# Supplementary material for: Integrated bulk and scRNA sequence identified anoikis-related diagnostic biomarkers and potential association with immune infiltration in type A aortic dissection
Source: Aging (Albany NY). 2023 Oct 24;15(20):11268–85. doi: 10.18632/aging.205126 (PMC10637813; doi:10.18632/aging.205126)
Supplement: Supplementary Table 2 [file aging-15-205126-s002.xlsx]

## Sheet: TableS2
Supplementary Table 2. Results of up-regulated DEGs between TAAD and HC.
	baseMean	log2FoldChange	lfcSE	stat	pvalue	padj
A4GALT	606.445	1.58788	0.285182	5.56793	2.57779e-08	8.36123e-07
ABCA1	1829.51	1.86522	0.240601	7.75235	9.02094e-15	1.0011e-12
ABCC3	612.765	2.51996	0.231028	10.9076	1.06039e-27	6.03566e-25
ABL2	2053.56	1.05884	0.147431	7.18194	6.87291e-13	5.51238e-11
AC010091.1	4.33776	5.7627	1.93172	2.9832	0.00285256	0.020263
AC010987.6	3.77697	5.5661	1.61824	3.4396	0.000582569	0.00548678
AC147651.4	70.1853	2.43204	0.562827	4.32111	1.55243e-05	0.000251078
ACVR1B	536.641	1.13033	0.195902	5.76987	7.93306e-09	2.83933e-07
ADAMTS3	349.025	1.38054	0.225603	6.11934	9.39639e-10	4.13464e-08
ADARB2	8.03097	4.0149	1.31512	3.05287	0.00226666	0.0167874
ADH4	129.909	3.50517	0.510684	6.86369	6.71037e-12	4.51926e-10
ADH6	3.14042	5.2952	1.71788	3.08241	0.00205335	0.0154425
ADIRF	1926.61	1.23469	0.268068	4.60588	4.10725e-06	7.99916e-05
ADK	203.563	1.48105	0.357262	4.14555	3.38995e-05	0.000491098
ADM	450.397	3.65792	0.526806	6.94358	3.82293e-12	2.71998e-10
ADORA3	198.939	1.4756	0.323878	4.55603	5.21298e-06	9.83775e-05
AGTRAP	85.8242	1.58925	0.464358	3.42247	0.000620544	0.00579126
AK4	56.0577	1.52109	0.528414	2.8786	0.00399443	0.0263745
AKR1C1	432.375	1.25902	0.268713	4.68537	2.79453e-06	5.67427e-05
AKR1C3	987.278	1.06299	0.213036	4.98971	6.04706e-07	1.44777e-05
ALDOC	677.899	1.0141	0.241188	4.20459	2.6156e-05	0.000393791
ALKBH2	114.044	1.13237	0.295768	3.82858	0.000128883	0.00153348
ALOX15B	5.68655	6.15202	1.33124	4.62125	3.81431e-06	7.50211e-05
ALOX5AP	212.973	1.46149	0.38148	3.83111	0.000127565	0.00151985
ANGPTL2	2474.83	1.68982	0.277577	6.08775	1.14509e-09	4.96439e-08
ANGPTL4	745.324	6.42043	0.854767	7.51133	5.85313e-14	5.52292e-12
ANPEP	240.291	2.38003	0.422015	5.63968	1.70368e-08	5.71528e-07
APCDD1L	152.873	1.38944	0.282153	4.9244	8.46193e-07	1.9724e-05
APLN	530.767	3.50446	0.356639	9.82633	8.67176e-23	3.12272e-20
APOL2	760.464	1.01862	0.190866	5.33684	9.45798e-08	2.73584e-06
AQP9	40.3413	2.58909	0.863112	2.99972	0.0027023	0.0193829
ARG2	27.2477	2.80278	0.83837	3.34313	0.000828396	0.00740854
ARHGAP22	111.195	1.33928	0.441001	3.0369	0.00239021	0.0174997
ARMC9	418.507	1.34339	0.222555	6.0362	1.57788e-09	6.56645e-08
ARNTL	262.575	1.6377	0.410054	3.99388	6.50019e-05	0.000852758
ARNTL2	666.9	1.27451	0.235655	5.40835	6.36065e-08	1.89905e-06
ARPC5L	580.73	1.28622	0.187549	6.85808	6.97924e-12	4.66473e-10
ARRDC3	3072.88	1.3918	0.197368	7.05179	1.76631e-12	1.3492e-10
ASS1	965.492	1.36496	0.223474	6.10793	1.00933e-09	4.42865e-08
ATP1A1	5177.68	1.30042	0.122196	10.6421	1.89868e-26	9.10027e-24
AURKB	5.50395	4.82449	1.80295	2.67588	0.00745338	0.0428864
B4GALT1	3001.25	1.01101	0.187077	5.40427	6.50743e-08	1.93959e-06
B4GALT5	1303.56	1.04546	0.159502	6.55452	5.58209e-11	3.078e-09
BAZ1A	1050.17	1.03132	0.187685	5.49493	3.90866e-08	1.22501e-06
BCAT1	1263.63	1.14156	0.380969	2.99647	0.00273124	0.0195667
BCL2A1	94.4848	2.1953	0.664952	3.30145	0.000961882	0.00833206
BCL3	142.654	1.86413	0.353749	5.26963	1.36696e-07	3.82251e-06
BCL6	1920.26	1.87644	0.222222	8.44397	3.06738e-17	5.0583e-15
BCR	417.249	1.20818	0.297392	4.06258	4.85333e-05	0.00066826
BEND3	89.8808	1.21843	0.357541	3.4078	0.000654878	0.00607535
BEST1	70.2075	1.35127	0.350925	3.85061	0.000117824	0.00141332
BHLHE40	2215.87	1.66793	0.273091	6.10759	1.01147e-09	4.42865e-08
BIRC3	1692.01	2.49297	0.526714	4.73305	2.21167e-06	4.65137e-05
BMP2	302.685	2.15605	0.28469	7.57332	3.63811e-14	3.60643e-12
C10orf10	6195.92	3.96545	0.223882	17.7122	3.37583e-70	1.98555e-66
C11orf91	18.1565	3.15978	0.919641	3.43589	0.000590612	0.00553738
C12orf68	87.7365	1.18981	0.360414	3.30122	0.00096264	0.00833417
C15orf48	7.28899	5.91727	1.35174	4.37752	1.20035e-05	0.000202294
C15orf57	27.0477	1.56881	0.596777	2.62881	0.00856848	0.0475892
C17orf62	239.086	1.01915	0.201138	5.06693	4.04273e-07	1.00754e-05
C17orf96	11.4655	3.15144	1.16004	2.71667	0.0065942	0.0389406
C19orf59	20.9663	3.98915	0.973322	4.09849	4.15855e-05	0.000586552
C1GALT1	905.061	1.06491	0.262747	4.05298	5.05702e-05	0.000692251
C1orf162	334.178	1.27035	0.367888	3.45309	0.000554202	0.00526596
C1orf192	10.1955	3.55216	1.11112	3.19693	0.001389	0.011331
C1QTNF1	2646.4	2.21928	0.259935	8.53783	1.36772e-17	2.38944e-15
C1R	6843.76	1.33586	0.253419	5.27134	1.35431e-07	3.79313e-06
C1RL	1873.17	1.94188	0.220227	8.81763	1.16906e-18	2.67897e-16
C2CD4A	26.2864	6.74689	1.05475	6.39666	1.58807e-10	8.05217e-09
C5AR1	405.386	1.11937	0.321871	3.47768	0.000505767	0.00485014
C5orf27	158.556	4.80338	0.990537	4.84926	1.23921e-06	2.78192e-05
CA12	1598.47	3.33864	0.449226	7.43197	1.06991e-13	9.58302e-12
CA13	54.857	1.62266	0.52177	3.10991	0.00187143	0.0144135
CA9	79.6476	9.96323	0.83465	11.937	7.59027e-33	8.37065e-30
CAPG	359.359	1.11245	0.339995	3.27196	0.00106804	0.00908705
CARD6	707.74	1.20602	0.238405	5.05872	4.22086e-07	1.04897e-05
CASC5	85.685	1.306	0.490711	2.66144	0.00778069	0.0442872
CASP4	879.922	1.57603	0.181275	8.6941	3.49583e-18	7.17255e-16
CCDC71L	477.612	2.05025	0.271835	7.54227	4.61868e-14	4.45337e-12
CCDC86	245.13	1.05224	0.289359	3.63646	0.000276406	0.00293807
CCL2	1340.56	2.83455	0.412074	6.87875	6.03817e-12	4.14566e-10
CCL20	113.17	8.064	1.30408	6.18366	6.26327e-10	2.87053e-08
CCL7	18.6465	7.86757	1.22488	6.42315	1.33485e-10	6.88696e-09
CCR1	206.196	1.16563	0.347444	3.35488	0.000793982	0.00716981
CCRN4L	90.5787	1.51002	0.511637	2.95136	0.00316377	0.0220564
CD163	7686.66	2.37573	0.485904	4.88931	1.01191e-06	2.30986e-05
CD3EAP	88.9903	1.9555	0.344965	5.6687	1.43881e-08	4.9106e-07
CD68	1287.11	2.36542	0.294299	8.03746	9.17195e-16	1.21683e-13
CD82	461.181	2.53034	0.336816	7.51252	5.79991e-14	5.50212e-12
CDC37L1	1013.55	1.093	0.250126	4.3698	1.2436e-05	0.000208389
CDC42EP4	485.448	1.17834	0.202208	5.82738	5.63047e-09	2.0612e-07
CDC7	84.8974	1.77395	0.633762	2.79907	0.00512495	0.0320164
CDCP1	172.451	2.50939	0.314648	7.97523	1.52099e-15	1.94477e-13
CDK18	411.412	1.44343	0.320335	4.50599	6.60641e-06	0.000121049
CDK2	358.708	1.59754	0.187671	8.51245	1.70303e-17	2.91748e-15
CDKN1A	1660.73	1.71121	0.268616	6.37047	1.88446e-10	9.44637e-09
CEBPB	256.403	1.31826	0.205762	6.40672	1.48679e-10	7.58219e-09
CEBPD	498.33	2.01424	0.257039	7.83634	4.63851e-15	5.31471e-13
CFB	1637.69	1.57787	0.451367	3.49577	0.000472702	0.00458419
CHAF1B	33.0682	1.36795	0.485845	2.81561	0.00486846	0.0307239
CHEK2	91.9847	1.54176	0.376633	4.09352	4.24868e-05	0.000596879
CHI3L2	388.755	4.95794	1.09872	4.51245	6.4083e-06	0.000117909
CHST1	302.918	2.42215	0.37786	6.41019	1.45338e-10	7.43331e-09
CHST3	1948.35	1.05915	0.141964	7.46066	8.60912e-14	7.87088e-12
CHSY1	2336.37	1.47946	0.179481	8.24299	1.67962e-16	2.44602e-14
CISD1	457.53	1.06104	0.254727	4.16542	3.10775e-05	0.000456588
CKS2	3.83912	5.28167	1.59564	3.31006	0.000932753	0.00811959
CLEC5A	321.599	2.15787	0.532951	4.04891	5.14575e-05	0.000703306
CLMP	6331.09	2.02174	0.153706	13.1533	1.62814e-39	3.19205e-36
CLSPN	72.8434	1.89746	0.628155	3.02069	0.00252203	0.0183208
CNTNAP1	281.154	1.26638	0.199628	6.34367	2.24355e-10	1.10889e-08
CP	25483.7	3.54294	0.456595	7.75948	8.52789e-15	9.52371e-13
CSMD2	64.772	1.21568	0.388485	3.12928	0.00175234	0.0137203
CSTF2T	1131.38	1.4113	0.18002	7.83968	4.51704e-15	5.20936e-13
CTSL	2367.18	1.05539	0.195756	5.39137	6.99221e-08	2.07357e-06
CXCL1	104.427	2.49063	0.858802	2.90012	0.00373022	0.0250551
CXCL3	28.7236	4.44287	1.04185	4.26442	2.0042e-05	0.000313846
CXCL5	246.506	8.68271	1.13092	7.67754	1.62176e-14	1.72386e-12
CXCL6	9.31059	4.9213	1.34494	3.65913	0.000253073	0.00272119
CYP19A1	45.6758	3.10359	0.891266	3.48222	0.000497275	0.0047817
DCHS2	9.85647	4.35274	1.17984	3.68926	0.000224906	0.00246031
DDIT4	989.108	3.0111	0.265806	11.3282	9.51772e-30	6.99751e-27
DHRS13	57.6864	1.99514	0.730226	2.73222	0.00629083	0.0374373
DIO2	850.299	2.3835	0.497814	4.78793	1.68511e-06	3.63494e-05
DIO3	76.0125	8.68576	1.47341	5.89502	3.74642e-09	1.42777e-07
DNAH11	213.87	1.38201	0.437666	3.15767	0.00159035	0.0126861
DNAJB9	1176.28	1.20809	0.258115	4.68044	2.86259e-06	5.77922e-05
E2F3	730.327	1.0776	0.162288	6.64005	3.13577e-11	1.81412e-09
EDN2	4.39089	5.78088	1.62909	3.54854	0.00038737	0.00387261
EGLN3	875.942	2.70169	0.385611	7.00626	2.4478e-12	1.81476e-10
EIF4A1	684.796	1.0468	0.167305	6.25682	3.92909e-10	1.85868e-08
EIF4EBP1	89.8389	2.03602	0.394465	5.16148	2.4501e-07	6.45255e-06
EIF5AL1	67.1842	1.03695	0.321398	3.22636	0.00125374	0.0104056
ELL2	12378.3	2.80319	0.146007	19.1989	3.77829e-82	3.33339e-78
ELOVL6	149.299	1.45522	0.435088	3.34466	0.000823844	0.00738304
EMR2	93.4772	1.44783	0.548854	2.63792	0.0083417	0.0465642
ENDOU	15.5268	3.22191	1.16412	2.76769	0.00564549	0.0345285
ENG	923.344	1.47949	0.314015	4.71153	2.45864e-06	5.09784e-05
ENTPD7	50.9297	1.08231	0.374647	2.88889	0.00386605	0.0257226
EPOR	39.6628	1.47087	0.560325	2.62503	0.00866419	0.0480149
ERMN	3.97004	5.62961	2.00806	2.80351	0.00505501	0.0316633
ERN1	427.559	1.14281	0.205891	5.55052	2.84815e-08	9.15404e-07
ERO1L	3174.82	1.81996	0.205872	8.84023	9.55193e-19	2.27762e-16
ERRFI1	4265.25	2.91972	0.350156	8.33834	7.53421e-17	1.16615e-14
ESM1	281.142	3.44237	0.422345	8.15061	3.62102e-16	4.99163e-14
ESPL1	24.9799	2.60888	0.768683	3.39396	0.0006889	0.00632118
ETS2	5500.6	1.33722	0.156984	8.5182	1.62056e-17	2.80342e-15
FAM129B	2323.89	1.42149	0.161486	8.80258	1.33701e-18	3.02456e-16
FAM132B	17.0438	3.11369	0.940409	3.311	0.000929639	0.00810049
FAM20C	902.783	3.37158	0.213453	15.7954	3.34732e-56	1.18127e-52
FAM27E2	10.8279	3.17306	1.10375	2.87481	0.0040427	0.026607
FAM27E3	189.497	3.08179	0.501414	6.1462	7.93632e-10	3.57236e-08
FAM46A	4425.45	1.33099	0.195063	6.82339	8.89198e-12	5.81107e-10
FAM89A	69.2793	1.41125	0.473639	2.9796	0.00288627	0.0204778
FBXO32	16511.5	1.19181	0.156395	7.62054	2.52623e-14	2.56846e-12
FCGR3A	1603.17	1.28609	0.409209	3.14287	0.00167301	0.0132082
FEN1	74.2225	1.05301	0.343209	3.06814	0.00215398	0.0160367
FGF5	6.27229	4.83809	1.53852	3.14465	0.00166286	0.0131457
FGR	79.492	1.349	0.384978	3.50411	0.000458139	0.0044687
FHAD1	4.81002	5.90945	1.47093	4.0175	5.88195e-05	0.000782117
FKBP11	147.865	1.55492	0.473241	3.28568	0.00101736	0.00873419
FKBP5	4695.1	2.53402	0.379138	6.68362	2.33109e-11	1.37565e-09
FLJ27255	7.81871	6.61498	1.63117	4.05535	5.00602e-05	0.000687402
FLOT2	1868.37	1.03977	0.163787	6.34829	2.17718e-10	1.07973e-08
FLVCR2	16.8264	2.31227	0.866923	2.66722	0.0076482	0.0436175
FMN1	427.575	1.06449	0.247993	4.29241	1.76744e-05	0.000281467
FN1	225304	1.08753	0.208397	5.21856	1.80317e-07	4.8874e-06
FNDC4	142.774	1.00254	0.247305	4.05384	5.03827e-05	0.000690755
FOSL1	191.074	3.18837	0.463955	6.87215	6.324e-12	4.30837e-10
FOSL2	5792.63	1.17489	0.162205	7.24324	4.38104e-13	3.64639e-11
FOXL1	630.47	1.07589	0.196015	5.48882	4.04633e-08	1.25922e-06
FPR1	135.754	1.84403	0.352011	5.23856	1.61834e-07	4.45485e-06
FTH1	31016.9	1.75704	0.366655	4.79208	1.6506e-06	3.57361e-05
GADD45B	3019.6	2.5069	0.256565	9.771	1.49964e-22	5.18847e-20
GALNT15	1279.29	1.61802	0.416805	3.88196	0.000103618	0.00126441
GAPDH	21243.1	1.16834	0.204459	5.71431	1.10148e-08	3.86394e-07
GCH1	180.6	1.42091	0.496739	2.86049	0.00422993	0.0274942
GCKR	30.1272	8.55733	0.851713	10.0472	9.45081e-24	3.54807e-21
GDF15	34.8215	3.12642	0.743621	4.20432	2.6187e-05	0.000393921
GGCT	186.511	1.06522	0.323435	3.29347	0.000989576	0.00852239
GGT5	420.34	1.64882	0.383227	4.30246	1.68911e-05	0.000270212
GK	163.203	1.11355	0.290066	3.83894	0.000123564	0.00147417
GLDN	1778.44	1.0053	0.197303	5.09521	3.48358e-07	8.88263e-06
GLIS3	585.037	1.71682	0.223826	7.67033	1.71555e-14	1.80184e-12
GLRX	2995.74	4.30767	0.359667	11.9768	4.70063e-33	5.5295e-30
GLUL	6722.53	1.04054	0.182937	5.68796	1.28568e-08	4.45693e-07
GNAI2	3.23587	5.33667	1.70543	3.12923	0.00175265	0.0137203
GNPNAT1	1265	1.11386	0.206204	5.40172	6.6004e-08	1.96398e-06
GPC2	4.62588	5.85609	1.59127	3.68013	0.000233118	0.00253912
GPR162	5.20285	5.73307	1.43817	3.98635	6.70973e-05	0.000872463
HGF	1392.54	1.97581	0.361719	5.46228	4.70066e-08	1.445e-06
HIF1A	5057.1	1.65108	0.1869	8.83401	1.00992e-18	2.376e-16
HIF1A-AS2	172.805	2.68234	0.756709	3.54475	0.000392991	0.00392435
HILPDA	671.325	3.00969	0.551717	5.45514	4.8933e-08	1.4964e-06
HIPK2	4501.43	1.06276	0.190669	5.57387	2.49148e-08	8.09616e-07
HIST1H2AG	54.5594	1.33742	0.416681	3.2097	0.00132875	0.0109406
HIST1H2AM	116.01	1.27484	0.41021	3.10777	0.00188506	0.0144995
HK2	1284.46	2.82427	0.298426	9.46389	2.96694e-21	9.17197e-19
HMGA1	16.6992	2.20504	0.780809	2.82404	0.00474219	0.0301209
HMGA2	20.1167	5.65636	0.955553	5.91946	3.22999e-09	1.24985e-07
HMOX1	481.325	3.92318	0.454762	8.62689	6.30416e-18	1.22238e-15
HRH1	17.0078	3.33603	1.05317	3.16761	0.00153697	0.0123497
HRH2	211.862	3.21806	0.47235	6.81288	9.56651e-12	6.18319e-10
HSBP1L1	73.9519	1.04924	0.291419	3.60045	0.000317671	0.00328757
HSD11B1	83.2419	1.67714	0.577403	2.90463	0.00367689	0.0247918
HSPA5	12921.7	1.37596	0.262727	5.23722	1.63011e-07	4.47328e-06
HSPA6	164.813	2.28862	0.469284	4.87684	1.07801e-06	2.44493e-05
HSPA8	7534.84	1.09245	0.183176	5.96396	2.46195e-09	9.8283e-08
ICAM1	541.759	1.95682	0.631812	3.09716	0.00195387	0.0149053
IER3	1276.63	2.99896	0.478486	6.2676	3.66656e-10	1.74384e-08
IER5L	216.947	1.69924	0.277658	6.1199	9.36345e-10	4.13045e-08
IFI30	246.723	2.07454	0.350457	5.91955	3.2283e-09	1.24985e-07
IFITM2	1384.82	1.09849	0.16797	6.53977	6.16115e-11	3.36574e-09
IFITM3	5808.06	1.60967	0.170812	9.4236	4.35897e-21	1.30363e-18
IGFBP3	25052.7	3.47771	0.342345	10.1585	3.03692e-24	1.19081e-21
IGFBP5	41274	1.79197	0.405509	4.41906	9.91294e-06	0.000171652
IKZF4	282.705	1.01892	0.146234	6.96772	3.22127e-12	2.32948e-10
IL15RA	161.307	1.26173	0.309939	4.0709	4.6832e-05	0.000648627
IL1R1	8239.53	1.54703	0.242256	6.38591	1.70379e-10	8.61413e-09
IL1R2	37.6525	2.30097	0.650386	3.53786	0.000403386	0.00400549
IL1RAP	200.24	2.91816	0.298882	9.7636	1.6132e-22	5.47401e-20
IL1RL1	155.772	3.13272	0.836529	3.7449	0.000180466	0.00203731
IL1RL2	13.7515	3.3986	1.03547	3.28217	0.00103011	0.0088277
IL33	2773.37	1.1683	0.271222	4.30752	1.65092e-05	0.000264822
IL4R	905.657	1.31923	0.215389	6.12488	9.07533e-10	4.02107e-08
IL6	1067.28	2.86773	0.738412	3.88364	0.000102903	0.00125829
IL8	1889.74	5.3288	0.917494	5.808	6.32248e-09	2.28607e-07
IPO4	246.414	1.04521	0.194093	5.38506	7.24196e-08	2.14044e-06
IRAK2	240.301	1.98754	0.359652	5.52629	3.27065e-08	1.03983e-06
ITGA2	783.102	2.06716	0.303893	6.80226	1.02992e-11	6.53702e-10
ITGA5	4124.35	2.61574	0.231337	11.3071	1.21065e-29	8.54478e-27
ITGAX	45.5895	1.33739	0.471881	2.83416	0.00459467	0.0293106
ITGB3	6969.86	2.26307	0.172595	13.1121	2.80862e-39	4.9558e-36
ITPKC	791.012	2.06798	0.179927	11.4935	1.42295e-30	1.25539e-27
JAK3	130.535	1.18224	0.405768	2.9136	0.00357287	0.0242567
JHDM1D-AS1	92.4604	1.39749	0.366222	3.81597	0.000135648	0.00160315
KBTBD8	62.8681	1.55518	0.568519	2.7355	0.00622864	0.0371801
KCNK15	288.318	1.30949	0.325154	4.02729	5.64235e-05	0.00075653
KCNK3	167.029	1.18998	0.340091	3.49901	0.000466997	0.00454504
KCNQ5-IT1	137.501	1.04949	0.387191	2.71052	0.00671787	0.039486
KDM6B	586.839	1.19414	0.250423	4.76848	1.85624e-06	3.97492e-05
KHDRBS3	228.209	1.02095	0.224961	4.53833	5.67004e-06	0.000106263
KIAA0247	1212.44	1.27998	0.200509	6.38366	1.7291e-10	8.71713e-09
KIAA0895L	131.267	1.26858	0.274266	4.62535	3.73958e-06	7.40572e-05
KIAA1456	26.9946	2.24391	0.716795	3.13048	0.00174523	0.0136743
KIAA1644	103.372	1.4361	0.528388	2.71788	0.00657007	0.0388111
KIF14	30.7653	1.84684	0.651337	2.83546	0.00457599	0.0292231
KLF17	47.1706	2.62058	0.592781	4.42083	9.83237e-06	0.000170592
KLHL25	52.2569	1.72265	0.416977	4.13128	3.6075e-05	0.00051878
KRT14	37.859	1.84725	0.612966	3.01363	0.00258145	0.0186737
KRT16	115.511	3.74991	0.803893	4.66468	3.09094e-06	6.19769e-05
LAIR1	255.024	1.07955	0.323955	3.3324	0.000861	0.00763051
LAMB1	5580.16	1.34078	0.160614	8.34782	6.95357e-17	1.0858e-14
LAMC2	277.275	2.44451	0.650288	3.75911	0.000170516	0.00194742
LAPTM5	1398.39	1.27977	0.265093	4.82761	1.38179e-06	3.06303e-05
LARP6	751.403	1.00771	0.212342	4.7457	2.07787e-06	4.39089e-05
LDHA	15253.6	1.23604	0.137161	9.01161	2.03056e-19	5.11845e-17
LDLR	237.968	1.25618	0.310734	4.04262	5.28568e-05	0.000715229
LHFPL2	1092.87	1.21604	0.161981	7.50725	6.03806e-14	5.66006e-12
LIF	330.581	5.76303	0.847213	6.80234	1.02936e-11	6.53702e-10
LILRA6	28.6027	2.30967	0.817783	2.82431	0.00473824	0.0301067
LINC00941	26.761	2.78667	0.7415	3.75816	0.00017117	0.0019511
LMNB1	150.368	2.0714	0.289374	7.15821	8.17371e-13	6.49662e-11
LNX1	350.581	1.43273	0.282188	5.07721	3.83018e-07	9.62728e-06
LOC100126584	3.88727	5.60572	1.78718	3.13663	0.00170904	0.0134385
LOC100129034	1465.96	1.34382	0.160799	8.35715	6.42515e-17	1.01225e-14
LOC100996433	47.7783	3.33024	0.629911	5.28684	1.24447e-07	3.52466e-06
LOC100996570	44.8541	2.92108	0.782946	3.73089	0.000190808	0.00213089
LOC101060172	3.80398	5.57263	1.98768	2.80358	0.00505391	0.0316633
LOC101927595	31.0506	1.49236	0.494876	3.01562	0.00256456	0.0185992
LOC101928173	3.77877	5.56158	1.67725	3.31588	0.000913544	0.00796811
LOC101928916	114.389	1.96624	0.548951	3.58181	0.000341223	0.0034843
LOC101929296	182.183	1.07379	0.267501	4.01414	5.96637e-05	0.000790365
LOC101929484	35.7638	2.6891	0.741855	3.62483	0.000289153	0.00303609
LOC101930357	34.8631	2.62187	0.845139	3.1023	0.00192024	0.014706
LOC102723625	67.0275	1.5264	0.371391	4.10996	3.95728e-05	0.000563437
LOC102723779	18.4404	2.79227	0.904484	3.08714	0.00202095	0.0152652
LOC102724594	22.6271	1.30405	0.466566	2.79499	0.00519005	0.0323256
LOC102724611	97.7316	1.24402	0.433133	2.87214	0.00407707	0.0267435
LOC102724660	49.7278	2.24057	0.754756	2.96861	0.00299153	0.0210805
LOC102724690	5.91154	4.93472	1.54345	3.19721	0.00138765	0.0113252
LOC102724720	90.271	4.95576	1.3934	3.5566	0.000375679	0.00377928
LOC102724944	160.584	1.05547	0.330323	3.19527	0.001397	0.0113752
LOC147004	5.97062	6.2282	1.64942	3.776	0.00015937	0.00184439
LOXL2	397.813	1.25026	0.282	4.43353	9.27044e-06	0.000162279
LPCAT1	817.401	1.10099	0.160374	6.86513	6.64284e-12	4.49092e-10
LPCAT3	267.293	1.52715	0.292966	5.21275	1.86066e-07	5.00478e-06
LRP8	383.288	1.98943	0.288653	6.89213	5.49647e-12	3.81832e-10
LUCAT1	87.5963	3.05814	1.02989	2.96938	0.00298398	0.021061
LURAP1	233.918	1.0131	0.247399	4.09499	4.22181e-05	0.000594049
MAD2L2	102.767	1.22151	0.296278	4.12284	3.74225e-05	0.000535691
MAFB	539.306	1.45833	0.252496	5.77564	7.66596e-09	2.76053e-07
MAFF	1169.86	1.16852	0.374404	3.12102	0.00180228	0.0140094
MAP4K4	9075.85	1.42824	0.211429	6.75516	1.42681e-11	8.80281e-10
MAPK13	123.484	1.12922	0.338995	3.33107	0.000865118	0.00765547
2023-03-03	179.954	3.07371	0.463584	6.63031	3.34982e-11	1.92533e-09
MARCO	91.5807	3.58802	0.964851	3.71873	0.000200225	0.0022258
MATR3	6.47094	4.28339	1.22466	3.4976	0.000469458	0.00456396
MBOAT7	140.061	1.0068	0.303546	3.31679	0.000910594	0.00795024
MEDAG	2715.99	1.6153	0.209183	7.72192	1.14591e-14	1.25588e-12
METTL1	116.04	1.29391	0.333254	3.88264	0.00010333	0.00126177
MFAP2	184.931	1.34628	0.303965	4.42906	9.4643e-06	0.000164854
MICALCL	376.877	1.41581	0.250276	5.65698	1.54062e-08	5.2077e-07
MID1IP1	588.029	1.2263	0.25044	4.89659	9.75127e-07	2.23747e-05
MIDN	514.557	1.09442	0.231245	4.73273	2.2152e-06	4.65324e-05
MIF	558.488	1.20321	0.307187	3.91688	8.97028e-05	0.00112423
MIR31HG	11.061	4.20297	1.06367	3.95138	7.77031e-05	0.000996418
MIR3605	65.5459	2.35146	0.565123	4.16098	3.16891e-05	0.000463259
MIR4737	2.97833	3.96302	1.4887	2.66207	0.00776611	0.0442328
MIR5690	60.1549	2.86794	1.05637	2.7149	0.00662948	0.0391097
MLKL	459.082	1.36327	0.254699	5.35245	8.67723e-08	2.53074e-06
MLLT11	247.653	1.18416	0.272693	4.34247	1.40888e-05	0.000231253
MMP1	28.2181	6.64433	0.887074	7.49017	6.87869e-14	6.35469e-12
MMP10	7.9203	6.63607	1.40653	4.71805	2.38115e-06	4.9605e-05
MMP14	4591.42	1.6299	0.160424	10.1599	2.99234e-24	1.19081e-21
MMP19	710.196	2.48596	0.269293	9.23144	2.67005e-20	7.59889e-18
MMP3	14.535	1.99366	0.746795	2.66962	0.00759363	0.0433764
MOCOS	90.6893	1.2035	0.394441	3.05115	0.00227964	0.0168373
MPV17L2	49.4663	1.44608	0.402031	3.59693	0.000321996	0.00332052
MRTO4	334.763	1.11644	0.213451	5.23045	1.69101e-07	4.62602e-06
MSMP	5.51345	6.10651	1.71739	3.5557	0.000376977	0.00378802
MSR1	1276.22	1.18285	0.300881	3.93128	8.44959e-05	0.00106571
MT1A	33.8374	2.14216	0.725023	2.95461	0.00313065	0.0218947
MT1E	1284.39	2.6491	0.389187	6.80675	9.98306e-12	6.4055e-10
MT1F	109.195	3.32827	0.90632	3.67229	0.000240382	0.00260613
MT1G	48.6868	3.54595	1.23774	2.86486	0.0041719	0.0272149
MT1M	193.524	2.99234	0.454161	6.58873	4.43608e-11	2.50881e-09
MT1X	3382.47	3.82416	0.241314	15.8472	1.46869e-56	6.47877e-53
MT2A	3169.02	3.57786	0.34742	10.2984	7.16505e-25	3.08359e-22
MTFP1	14.3887	3.84361	0.974406	3.94457	7.99431e-05	0.00102069
MTHFD2	2908.18	2.28009	0.110935	20.5533	7.19112e-94	1.26887e-89
MUC1	69.599	2.28181	0.562938	4.05339	5.04815e-05	0.000691573
MVP	1162.64	1.16839	0.168061	6.95215	3.59756e-12	2.5788e-10
MYC	618.281	1.55473	0.302583	5.1382	2.77388e-07	7.20841e-06
MYOM3	113.873	2.13931	0.435283	4.91475	8.88953e-07	2.05578e-05
NAMPT	7124.39	2.81018	0.406949	6.90548	5.00355e-12	3.5146e-10
NANS	552.275	1.32475	0.195736	6.76806	1.3052e-11	8.10926e-10
NAV1	287.279	1.58333	0.234629	6.74821	1.49676e-11	9.17023e-10
NDRG1	5658.71	1.83319	0.340803	5.37903	7.48901e-08	2.20239e-06
NDUFA4L2	362.826	1.4698	0.499981	2.9397	0.00328525	0.0227327
NDUFC2-KCTD14	46.0577	1.46852	0.520165	2.82318	0.00475498	0.0301693
NEK6	980.465	1.30841	0.189487	6.90503	5.01943e-12	3.5146e-10
NFIL3	672.433	1.48336	0.262117	5.65915	1.52124e-08	5.17193e-07
NFKBIA	3992.74	1.2219	0.240174	5.08756	3.62693e-07	9.15554e-06
NIPAL1	17.1395	3.09744	1.14108	2.71449	0.00663773	0.0391192
NKX3-1	137.604	1.17002	0.318273	3.67615	0.000236776	0.0025742
NLRP6	3.34747	5.07699	1.79839	2.82307	0.00475665	0.0301693
NME1	428.145	1.26326	0.262935	4.80446	1.55171e-06	3.40288e-05
NNMT	4855.42	2.09194	0.156941	13.3295	1.55957e-40	3.43983e-37
NOD2	76.9372	1.32555	0.425666	3.11405	0.00184536	0.0142438
NOP16	78.4296	1.52971	0.550361	2.77947	0.00544477	0.0335802
NPY2R	11.7565	7.20244	1.26113	5.71112	1.12236e-08	3.92659e-07
NRIP3	114.203	1.58017	0.310463	5.08972	3.58586e-07	9.07782e-06
NSDHL	110.236	1.03461	0.295979	3.49554	0.000473098	0.00458419
NUDT15	151.33	1.27455	0.260618	4.89049	1.00584e-06	2.29897e-05
OCLM	32.1882	1.27609	0.480254	2.65711	0.00788135	0.0447323
OLR1	80.0806	3.18228	0.713885	4.4577	8.28454e-06	0.000147807
ORM2	4.15511	5.70323	1.93076	2.95387	0.00313815	0.0219211
OSMR	3582.67	1.71616	0.15841	10.8337	2.38412e-27	1.31462e-24
P2RY2	204.22	1.14545	0.342509	3.34429	0.000824947	0.00738518
P2RY6	70.8474	1.13555	0.414741	2.73797	0.00618189	0.0370514
PAICS	1061.11	1.05402	0.161698	6.51846	7.10349e-11	3.82138e-09
PANX1	1399.69	1.08783	0.173399	6.27357	3.52867e-10	1.68279e-08
PCSK1	125.102	3.91798	0.828189	4.73078	2.23655e-06	4.6925e-05
PDGFA	4824.13	1.31548	0.262237	5.01636	5.26596e-07	1.2781e-05
PDGFRA	15881.4	1.64923	0.171073	9.64051	5.3922e-22	1.72992e-19
PDPN	346.218	1.65699	0.539777	3.06977	0.0021422	0.0159732
PGF	95.1863	2.13504	0.496163	4.30311	1.68417e-05	0.000269665
PGK1	3072.35	1.42958	0.179731	7.95401	1.80571e-15	2.22809e-13
PHC2	1760.02	1.7265	0.201118	8.58452	9.12194e-18	1.7123e-15
PHKG1	87.9427	1.42142	0.353553	4.0204	5.80992e-05	0.000774876
PHLDA1	1216.47	1.19948	0.198829	6.03272	1.6122e-09	6.69349e-08
PHYHIP	127.686	3.1343	0.539432	5.81037	6.23353e-09	2.25853e-07
PI15	503.926	4.30736	0.666608	6.46161	1.03595e-10	5.40809e-09
PIK3R5	102.337	1.53133	0.338886	4.51873	6.22119e-06	0.000114946
PIM1	322.057	1.33604	0.341858	3.90816	9.30011e-05	0.00115728
PITPNM1	182.506	1.00487	0.256884	3.91176	9.1626e-05	0.00114521
PKIB	6.98167	4.3369	1.48419	2.92206	0.00347728	0.0237724
PKNOX2	320.406	2.46365	0.320467	7.68771	1.49791e-14	1.61163e-12
PLAUR	351.731	2.0257	0.254664	7.95438	1.8003e-15	2.22809e-13
PLEKHA4	457.093	1.3002	0.298223	4.35984	1.30158e-05	0.00021585
PLEKHN1	7.47657	6.55116	1.13361	5.77902	7.51388e-09	2.7113e-07
PLIN2	923.237	2.14646	0.245202	8.75386	2.06177e-18	4.40761e-16
PLIN3	818.847	1.17472	0.193309	6.07691	1.22519e-09	5.24721e-08
PLOD2	6299.73	1.86523	0.221363	8.42613	3.57285e-17	5.8052e-15
PLSCR1	1060.28	1.3341	0.218878	6.09515	1.09336e-09	4.76355e-08
PMFBP1	3.50216	5.45339	1.82427	2.98936	0.00279563	0.0199389
PNMA2	1600.63	1.05722	0.181614	5.82123	5.84145e-09	2.12959e-07
PNP	689.859	2.46173	0.280346	8.78105	1.61954e-18	3.57209e-16
POLR2H	327.543	1.12593	0.166835	6.74878	1.49093e-11	9.16638e-10
POLR2I	61.04	1.12904	0.357419	3.15888	0.00158375	0.0126621
POP1	115.801	1.00458	0.292821	3.43068	0.000602069	0.00563283
PPFIA4	193.992	1.09908	0.356534	3.08268	0.00205147	0.0154425
PPP1R14C	25.6745	3.29911	1.02614	3.21506	0.00130419	0.0107837
PPP1R18	3198.19	1.27449	0.154565	8.24564	1.6428e-16	2.41559e-14
PPP4R4	65.688	1.35888	0.519914	2.61366	0.00895788	0.0493326
PRO2852	24.4651	1.91521	0.712392	2.68842	0.0071791	0.0416695
PROCR	208.445	1.11897	0.271656	4.11906	3.80415e-05	0.000543516
PRR7-AS1	3.2228	4.69667	1.75893	2.67018	0.0075811	0.0433469
PRRX1	5728.32	1.15728	0.15187	7.6202	2.53279e-14	2.56846e-12
PSTPIP2	183.891	1.08758	0.231602	4.69589	2.65451e-06	5.43373e-05
PTGS1	222.852	1.29881	0.295055	4.40193	1.07292e-05	0.00018416
PTPN1	1675.57	1.05735	0.160139	6.60272	4.03688e-11	2.29777e-09
PTPN2	444.439	1.26002	0.182698	6.89675	5.32059e-12	3.71075e-10
PTPRR	8.91004	3.66608	1.29745	2.8256	0.00471921	0.0300182
PTTG1	78.3913	1.2754	0.390597	3.26526	0.00109363	0.00928187
PTX3	279.884	3.92371	0.430304	9.11848	7.6186e-20	2.10047e-17
PUS7	390.077	1.07536	0.220045	4.887	1.02386e-06	2.3341e-05
PYGL	1007.6	2.09416	0.253608	8.25749	1.48773e-16	2.20596e-14
RAD51L3-RFFL	531.094	1.10829	0.155056	7.14768	8.82583e-13	6.98349e-11
RARA	74.9473	1.60977	0.576119	2.79416	0.00520351	0.0323801
RASGEF1B	398.897	1.56413	0.338201	4.62485	3.74871e-06	7.41548e-05
RELB	162.079	2.36731	0.404715	5.84932	4.93598e-09	1.84524e-07
RELT	46.0884	1.09806	0.409892	2.6789	0.00738654	0.0425516
RFC2	208.195	1.3382	0.283946	4.71288	2.44241e-06	5.07017e-05
RFFL	243.849	1.27361	0.241952	5.2639	1.41029e-07	3.92501e-06
RGPD2	96.6958	2.24325	0.536801	4.17892	2.92901e-05	0.000434306
RGS16	196.579	1.7795	0.456009	3.90234	9.52686e-05	0.00118049
RGS2	3312.82	1.30815	0.230326	5.67956	1.35042e-08	4.65393e-07
RGS8	5.24908	6.04425	1.88144	3.21256	0.00131558	0.0108576
RIBC2	3.78669	4.61021	1.61223	2.85953	0.0042427	0.0275586
RIPK4	149.386	1.44953	0.415293	3.49038	0.000482339	0.00466604
RND3	2230.33	1.80396	0.240813	7.49114	6.82798e-14	6.34104e-12
RNF24	2426.66	1.37105	0.134938	10.1606	2.97202e-24	1.19081e-21
RNR2	77.928	1.7819	0.611799	2.91256	0.00358476	0.0243001
RP11-290F20.3	40.4583	4.18518	0.876041	4.77738	1.77596e-06	3.81692e-05
RP11-436K8.1	6.82785	3.71957	1.36584	2.72328	0.0064638	0.0382988
RP11-569G13.2	3.81779	5.58253	1.78559	3.12643	0.00176943	0.0138149
RP11-61I13.3	85.0885	1.51428	0.507416	2.9843	0.00284227	0.0201981
RP11-65J3.1	45.3696	1.75954	0.528141	3.33158	0.000863548	0.00764925
RP11-664H17.1	246.763	1.23158	0.288807	4.26438	2.00456e-05	0.000313846
RPF2	967.825	1.19308	0.204969	5.82077	5.85755e-09	2.13106e-07
RPL22L1	123.862	1.18	0.268899	4.38825	1.14268e-05	0.000194244
RRM2	105.579	2.3744	0.835937	2.84041	0.00450562	0.0288782
RRP12	178.88	1.26694	0.284544	4.45253	8.48634e-06	0.000150494
RRS1	170.544	1.04347	0.268432	3.88729	0.000101371	0.00124388
RSPH9	3.42466	4.78773	1.35243	3.5401	0.000399971	0.00397829
RTN4RL1	36.5796	2.69886	0.855946	3.15308	0.0016156	0.0128296
S100A9	182.162	1.73007	0.497722	3.47598	0.000508983	0.00486775
SAT1	1543.21	1.68778	0.25511	6.61588	3.69351e-11	2.10913e-09
SBNO2	752.96	2.20366	0.192087	11.4722	1.82042e-30	1.52958e-27
SDF2L1	62.4955	1.56733	0.539621	2.9045	0.00367837	0.0247918
SEC14L2	144.056	2.35976	0.296606	7.95587	1.77877e-15	2.22809e-13
SEMA4B	7.38592	3.83806	1.39231	2.75661	0.00584036	0.03545
SERPINA1	627.374	3.40917	0.315005	10.8226	2.68983e-27	1.43824e-24
SERPINA3	3466.11	5.12765	0.454621	11.279	1.66685e-29	1.13122e-26
SERPINB1	1505.69	1.07614	0.207934	5.17542	2.27396e-07	6.03368e-06
SERPINB8	583.901	1.40394	0.209515	6.70092	2.07118e-11	1.2305e-09
SERPINE1	18681.7	2.53079	0.417554	6.06097	1.35299e-09	5.73884e-08
SH2B2	40.8921	1.68359	0.531757	3.16609	0.00154506	0.0124033
SH3D21	66.1057	2.0055	0.499437	4.01552	5.93147e-05	0.000786332
SHC1	1392.09	1.24434	0.147684	8.4257	3.5861e-17	5.8052e-15
SHMT2	613.308	1.81509	0.222021	8.17531	2.9511e-16	4.13272e-14
SIAE	93.8219	1.13533	0.412004	2.75562	0.00585807	0.0355453
SIGLEC10	52.1706	2.96508	0.737877	4.0184	5.8595e-05	0.000780309
SIGLEC9	43.3333	2.38802	0.736394	3.24286	0.00118335	0.00993825
SIRT4	3.39156	4.77938	1.47469	3.24093	0.0011914	0.00998446
SIX4	279.308	1.9622	0.275135	7.13177	9.90884e-13	7.80542e-11
SLA	323.621	2.37463	0.387722	6.12457	9.09271e-10	4.02107e-08
SLAMF8	118.653	1.58546	0.451472	3.51175	0.000445173	0.00435667
SLC11A1	143.246	3.42657	0.408194	8.39446	4.68025e-17	7.50755e-15
SLC16A10	77.5578	2.17042	0.559635	3.87828	0.0001052	0.00127929
SLC19A2	312.363	1.09903	0.243309	4.51702	6.27157e-06	0.000115634
SLC1A3	407.956	1.50411	0.395193	3.80603	0.000141217	0.00166007
SLC20A1	910.855	1.97604	0.221383	8.92587	4.42227e-19	1.08376e-16
SLC22A4	19.3296	2.34912	0.848165	2.76965	0.0056117	0.0344053
SLC2A1	1177.76	2.37961	0.391081	6.08469	1.16717e-09	5.04773e-08
SLC2A3	1357.93	1.31869	0.456419	2.88921	0.00386216	0.0257164
SLC2A5	30.3358	2.81075	0.906173	3.10178	0.00192358	0.0147207
SLC38A5	173.682	3.2271	0.376718	8.56635	1.06819e-17	1.94993e-15
SLC39A14	56.6054	3.02397	0.809702	3.73466	0.000187966	0.00210983
SLC39A8	417.158	1.00342	0.345938	2.90058	0.00372471	0.0250372
SLC3A2	457.673	1.10783	0.200425	5.52742	3.24979e-08	1.03694e-06
SLC43A2	173.234	2.10866	0.381878	5.52182	3.35506e-08	1.06475e-06
SLC43A3	1104.02	1.18655	0.196368	6.0425	1.51745e-09	6.32987e-08
SLC4A8	66.5205	1.60994	0.406813	3.95746	7.57518e-05	0.000973518
SLC50A1	247.139	1.15902	0.264587	4.38049	1.18412e-05	0.000200324
SLC6A6	963.639	1.47644	0.238812	6.18243	6.3121e-10	2.88541e-08
SLC6A8	275.87	1.57795	0.326286	4.8361	1.32411e-06	2.95e-05
SLC6A9	129.463	1.67178	0.399105	4.18882	2.80403e-05	0.000419143
SLC7A11	297.949	1.12427	0.409143	2.74787	0.00599835	0.0362024
SLC7A5	111.993	2.55671	0.544609	4.69458	2.67161e-06	5.45608e-05
SLC9A1	500.408	1.29487	0.210532	6.15048	7.72487e-10	3.48607e-08
SMIM3	362.535	2.14977	0.235464	9.12996	6.85224e-20	1.91917e-17
SMOX	163.026	1.07066	0.362808	2.95103	0.00316712	0.022071
SNAI2	1050.07	1.83497	0.394952	4.64607	3.38326e-06	6.75313e-05
SNCG	436.078	1.74832	0.257766	6.7826	1.18032e-11	7.41165e-10
SNHG1	144.983	1.31389	0.420246	3.12647	0.00176917	0.0138149
SOAT1	88.674	1.06201	0.331676	3.20195	0.00136503	0.0111716
SOD2	18036.9	3.61196	0.501222	7.2063	5.7494e-13	4.69667e-11
SOGA2	126.031	2.05294	0.381555	5.38045	7.42988e-08	2.19231e-06
SOX4	1159.38	1.94593	0.24456	7.95688	1.76436e-15	2.22809e-13
SPAG4	36.1112	3.19932	0.754537	4.24011	2.23411e-05	0.000343987
SPOCD1	45.791	3.9675	0.646767	6.13435	8.55063e-10	3.80999e-08
SPOCK1	2265.44	1.64361	0.281328	5.84235	5.14709e-09	1.9099e-07
SPP1	7238.71	3.42578	0.520967	6.57581	4.83882e-11	2.70585e-09
SPRED3	518.941	2.85675	0.300822	9.49647	2.1713e-21	6.84154e-19
SPRY4	2295.34	1.13082	0.215051	5.25838	1.45329e-07	4.03197e-06
SRGN	2146.05	1.06636	0.236579	4.50741	6.56224e-06	0.000120365
SRSF12	47.1366	1.66252	0.601376	2.76453	0.00570056	0.0347809
ST14	75.6345	2.70643	0.691969	3.9112	9.18372e-05	0.00114521
ST3GAL1	2483.27	1.32457	0.21786	6.07993	1.20236e-09	5.16194e-08
ST6GAL1	103.124	1.09455	0.348773	3.13829	0.00169938	0.0133744
STAC2	386.77	2.11099	0.352169	5.99425	2.0443e-09	8.31144e-08
STEAP1	270.916	2.98692	0.368485	8.10595	5.23371e-16	7.04953e-14
STEAP3	278.013	1.39735	0.359707	3.88469	0.000102462	0.00125378
STON1-GTF2A1L	8.74818	6.17828	1.13831	5.42757	5.71258e-08	1.726e-06
STX1A	68.5862	2.2188	0.594339	3.73322	0.000189045	0.00211791
STX6	1662.72	1.04263	0.160074	6.51345	7.34464e-11	3.93909e-09
SYNGAP1	127.709	1.08412	0.222769	4.86654	1.13566e-06	2.56579e-05
TANC2	59.2603	1.34778	0.487319	2.7657	0.0056801	0.0346807
TBC1D16	920.037	1.09262	0.155653	7.01955	2.22582e-12	1.67126e-10
TEAD2	1111.95	1.12187	0.166845	6.72401	1.76793e-11	1.06106e-09
TEAD4	98.8269	1.36884	0.2493	5.49075	4.00236e-08	1.24913e-06
TET3	530.946	1.60724	0.221673	7.25053	4.15152e-13	3.47858e-11
TFPI	2643.74	1.13053	0.25838	4.37544	1.21187e-05	0.000203652
TFPI2	513.019	1.53162	0.322076	4.75547	1.97981e-06	4.20889e-05
TGFBI	2519.04	1.40008	0.219672	6.3735	1.84767e-10	9.28837e-09
TGM2	16288.3	2.19843	0.326316	6.73714	1.61532e-11	9.76108e-10
THBD	5675.78	3.48114	0.389635	8.93438	4.09464e-19	1.0176e-16
THBS2	34076.4	2.34254	0.236596	9.90101	4.12099e-23	1.51489e-20
TIFA	322.392	1.03646	0.228904	4.52792	5.95681e-06	0.000110757
TIMELESS	98.5183	1.17295	0.387531	3.02674	0.00247209	0.017995
TIMP1	5509.83	1.72036	0.243835	7.05542	1.72078e-12	1.32014e-10
TJP2	2992.06	1.01819	0.135637	7.50672	6.06263e-14	5.66006e-12
TLCD2	314.916	1.03636	0.219557	4.72021	2.35599e-06	4.92552e-05
TLE2	252.973	1.598	0.320436	4.98695	6.13411e-07	1.46662e-05
TLE6	10.4002	6.13629	1.26148	4.86436	1.14826e-06	2.59093e-05
TLR2	1773.49	3.04552	0.294043	10.3574	3.87364e-25	1.70876e-22
TM4SF1	11760.2	2.03278	0.230425	8.82185	1.12587e-18	2.61394e-16
TM4SF1-AS1	3.61145	5.50174	1.80236	3.05253	0.00226924	0.0167886
TMEM2	1103.4	1.1373	0.233473	4.87124	1.10902e-06	2.51203e-05
TMEM39B	89.7587	1.60689	0.350577	4.58355	4.57143e-06	8.75819e-05
TMEM52B	6.67105	6.08245	1.24307	4.89307	9.92772e-07	2.27499e-05
TMEM54	65.8867	1.52365	0.336214	4.53177	5.84909e-06	0.000109228
TNC	12064.1	4.11517	0.48041	8.56594	1.07193e-17	1.94993e-15
TNFAIP3	670.309	1.30528	0.335429	3.89136	9.96831e-05	0.00122614
TNFAIP8L3	576.488	1.30533	0.172102	7.58466	3.33371e-14	3.32335e-12
TNFRSF10D	678.543	2.20446	0.228568	9.64467	5.17762e-22	1.69183e-19
TNFRSF11A	113.707	1.03578	0.383746	2.69912	0.00695239	0.0405881
TNFRSF9	48.8325	2.84687	0.782291	3.63915	0.000273542	0.00291288
TNFSF8	202.238	1.5075	0.347004	4.34434	1.39697e-05	0.000229657
TNIP2	373.855	1.165	0.220414	5.28552	1.2535e-07	3.53888e-06
TOP1MT	321.263	1.10117	0.237965	4.62744	3.70216e-06	7.3481e-05
TPI1	2817.77	1.21842	0.186359	6.53807	6.23198e-11	3.39393e-09
TRAF1	939.736	1.76212	0.226643	7.77485	7.55365e-15	8.54386e-13
TRAF3IP2	508.518	2.02013	0.21451	9.41743	4.62275e-21	1.35947e-18
TREM1	176.487	3.05724	0.827031	3.69664	0.000218468	0.00239745
TRIM9	69.948	3.26548	0.666783	4.89736	9.71328e-07	2.23165e-05
TRNAI2	4.58248	5.84566	2.10155	2.78159	0.00540926	0.0334196
TRNAK33	43.3527	2.21084	0.776827	2.84599	0.00442732	0.0285042
TSLP	78.7185	1.63809	0.422013	3.8816	0.000103771	0.0012654
TUBB3	51.9579	2.19307	0.65454	3.35056	0.000806497	0.00726053
TULP2	5.42096	3.59252	1.34688	2.66729	0.00764659	0.0436175
TUSC1	249.499	1.09854	0.250913	4.37816	1.19684e-05	0.000202088
TXN	2706.69	1.23158	0.206605	5.96102	2.50663e-09	9.93919e-08
UAP1	1311.9	1.0829	0.168197	6.43828	1.20838e-10	6.27116e-09
UBAP1	65.9022	1.37977	0.519977	2.65352	0.00796578	0.0450068
UBASH3B	279.822	2.76739	0.26138	10.5876	3.40125e-26	1.57934e-23
UCK2	179.527	1.05499	0.305858	3.44928	0.000562093	0.00532946
UGDH	1929.7	1.007	0.172635	5.83308	5.44119e-09	2.00021e-07
ULBP1	3.88652	5.60161	1.80485	3.10364	0.00191156	0.014665
UPP1	252.088	2.12429	0.30398	6.98825	2.78342e-12	2.05496e-10
USP54	548.655	1.10895	0.261448	4.24159	2.21943e-05	0.000342452
VDR	216.24	1.14025	0.244992	4.65425	3.2516e-06	6.51243e-05
VEGFA	3899	4.19166	0.380729	11.0096	3.43652e-28	2.09095e-25
VMP1	3939.24	1.17475	0.19706	5.9614	2.50088e-09	9.93874e-08
WBP1L	1552.51	1.071	0.123185	8.69424	3.4917e-18	7.17255e-16
WDR12	388.325	1.06509	0.237069	4.49272	7.03182e-06	0.000127519
YARS	849.289	1.05898	0.117157	9.03898	1.58141e-19	4.16476e-17
YBX3	3463.94	1.46472	0.16759	8.73987	2.33383e-18	4.90243e-16
ZDHHC9	723.07	1.67525	0.222543	7.52776	5.16169e-14	4.9499e-12
ZFP36L2	3979.26	1.0519	0.166985	6.29941	2.98783e-10	1.44836e-08
ZNF286B	110.345	1.06238	0.327096	3.24792	0.0011625	0.00980982
ZNF395	2246.34	1.89814	0.263832	7.19449	6.26936e-13	5.09783e-11
ZNF703	134.257	1.25165	0.385543	3.24646	0.0011685	0.0098463
ZSWIM4	109.174	1.17614	0.401616	2.92852	0.00340581	0.0233562
ZWINT	33.2217	1.70698	0.653973	2.61018	0.00904959	0.0497445
