# Supplementary material for: Integrated bulk and scRNA sequence identified anoikis-related diagnostic biomarkers and potential association with immune infiltration in type A aortic dissection
Source: Aging (Albany NY). 2023 Oct 24;15(20):11268–85. doi: 10.18632/aging.205126 (PMC10637813; doi:10.18632/aging.205126)
Supplement: Supplementary Table 3 [file aging-15-205126-s003.xlsx]

## Sheet: TableS3
Supplementary Table 3. Results of down-regulated DEGs between TAAD and HC.
	baseMean	log2FoldChange	lfcSE	stat	pvalue	padj
A2M-AS1	79.2046	-1.31831	0.332077	-3.9699	7.19028e-05	0.000928109
ABCA10	254.349	-3.71266	0.720515	-5.15278	2.56648e-07	6.71891e-06
ABCA3	378.507	-1.31754	0.21411	-6.15357	7.57576e-10	3.43636e-08
ABCA6	178.435	-1.67442	0.452523	-3.70018	0.000215451	0.00236792
ABCA8	1092.92	-1.5658	0.435246	-3.5975	0.000321288	0.00331587
ABCA9	439.119	-1.90225	0.533107	-3.56823	0.000359395	0.00364456
ABCD2	41.9269	-3.26431	0.726318	-4.49432	6.97917e-06	0.000126956
ABCG2	141.993	-3.10207	0.2839	-10.9266	8.59866e-28	5.05745e-25
ABI3BP	1644.67	-1.408	0.206455	-6.8199	9.11018e-12	5.9099e-10
ABLIM1	2844.89	-1.26993	0.181954	-6.97937	2.96508e-12	2.17091e-10
AC005022.1	54.7167	-1.63664	0.394085	-4.15303	3.28108e-05	0.000478469
AC007743.1	9.57568	-6.25398	1.21491	-5.14768	2.63722e-07	6.86337e-06
ACACB	1028.03	-1.58777	0.225314	-7.04691	1.82933e-12	1.38749e-10
ACE	56.8015	-3.54629	0.652632	-5.43383	5.5156e-08	1.66934e-06
ACE2	9.75681	-3.19765	1.11863	-2.85855	0.00425586	0.0276286
ACKR3	398.506	-1.75318	0.25682	-6.82648	8.70219e-12	5.70818e-10
ACKR4	214.265	-2.99442	0.422291	-7.0909	1.33241e-12	1.0357e-10
ACOT11	100.391	-1.07514	0.288025	-3.73281	0.000189352	0.00211866
ACSL5	219.115	-1.08684	0.358757	-3.02945	0.00245	0.0178417
ACTA2	31552.5	-1.70269	0.370006	-4.60177	4.18907e-06	8.14054e-05
ACTC1	654.281	-1.71855	0.574483	-2.99147	0.00277639	0.0198338
ACTG2	1162.57	-1.13773	0.367033	-3.09981	0.00193647	0.0147901
ACTN2	495.68	-1.33943	0.345853	-3.87285	0.000107572	0.00130634
ACTN4	10931	-1.03259	0.24345	-4.2415	2.22026e-05	0.000342452
ACVR1C	50.5727	-3.91086	1.21533	-3.21794	0.00129115	0.0106959
ACVRL1	157.671	-1.57851	0.388251	-4.0657	4.78889e-05	0.000661708
ADAM22	270.92	-2.09206	0.373762	-5.5973	2.17713e-08	7.14043e-07
ADAM33	402.232	-1.33096	0.342038	-3.89128	9.9717e-05	0.00122614
ADAMTS17	59.2873	-1.11054	0.320536	-3.46462	0.000530972	0.00506
ADAMTS18	9.68364	-6.56938	1.54027	-4.26508	1.99834e-05	0.000313708
ADCY1	120.567	-2.35385	0.596696	-3.9448	7.98665e-05	0.00102045
ADCY4	64.7564	-3.93281	0.964476	-4.07766	4.54905e-05	0.000633528
ADCYAP1R1	28.7524	-3.28975	0.685997	-4.79557	1.62209e-06	3.5292e-05
ADD2	15.9169	-3.83749	1.30824	-2.93333	0.00335345	0.0230866
ADHFE1	210.186	-1.38625	0.262789	-5.27513	1.32664e-07	3.73342e-06
ADIPOQ	80.0482	-9.61543	1.19729	-8.03098	9.66944e-16	1.27326e-13
ADRA2A	52.1731	-1.77173	0.655611	-2.70241	0.00688393	0.0402608
ADRB2	73.9236	-1.47267	0.431549	-3.41251	0.000643668	0.0059745
AFAP1L1	180.094	-1.35358	0.325043	-4.16432	3.12285e-05	0.000458415
AFAP1L2	204.053	-1.87566	0.404628	-4.63551	3.56057e-06	7.083e-05
AFF3	306.819	-2.27943	0.376394	-6.05598	1.39569e-09	5.87757e-08
AGTR1	119.006	-1.8801	0.408191	-4.60594	4.10601e-06	7.99916e-05
AGTR2	7.51063	-6.20112	1.46374	-4.23649	2.27036e-05	0.000348959
AJUBA	179.051	-1.08769	0.288433	-3.77104	0.000162566	0.00187233
AK5	35.1916	-2.48472	0.657441	-3.77938	0.00015722	0.0018275
AKAP5	297.884	-1.82249	0.299626	-6.08254	1.1829e-09	5.10325e-08
AKR1E2	121.124	-1.12909	0.270787	-4.16966	3.05055e-05	0.000448558
ALDH1A1	982.22	-1.91767	0.241739	-7.93284	2.14191e-15	2.60649e-13
ALDH1A2	121.145	-1.27277	0.413857	-3.07538	0.00210233	0.01573
ALDH1A3	45.9745	-2.10836	0.786253	-2.68153	0.00732859	0.0422868
ALDH1B1	3027.66	-1.52493	0.271575	-5.61512	1.96427e-08	6.49056e-07
ALDH5A1	265.394	-1.04401	0.210245	-4.96568	6.84604e-07	1.61608e-05
ALPL	14.5881	-5.36662	1.22971	-4.36413	1.2763e-05	0.000212817
AMICA1	68.5392	-1.54671	0.383287	-4.03539	5.45113e-05	0.000733677
AMIGO2	636.189	-2.04673	0.232876	-8.7889	1.51028e-18	3.37327e-16
AMOTL2	1078.61	-1.75355	0.212884	-8.23709	1.7645e-16	2.53127e-14
AMT	103.516	-1.6107	0.327692	-4.91527	8.86588e-07	2.053e-05
AMY2B	78.0097	-1.09769	0.31125	-3.52672	0.000420745	0.00415215
ANGPT1	1732.48	-1.1818	0.170694	-6.92346	4.40743e-12	3.11077e-10
ANGPTL5	6.67505	-6.03291	1.63018	-3.70075	0.000214961	0.00236618
ANGPTL7	154.968	-2.15627	0.466451	-4.62271	3.78757e-06	7.47559e-05
ANKRD29	59.6205	-3.20641	0.598992	-5.353	8.65055e-08	2.52714e-06
ANKRD6	1540.23	-1.7648	0.153394	-11.505	1.24477e-30	1.15599e-27
ANO5	726.278	-1.08713	0.237823	-4.57117	4.85016e-06	9.23204e-05
ANXA3	351.531	-2.81336	0.325178	-8.65178	5.07034e-18	1.00524e-15
APLNR	211.671	-4.12215	0.748364	-5.50821	3.62492e-08	1.14422e-06
APOB	1115.9	-1.84428	0.24743	-7.45374	9.07339e-14	8.21025e-12
APOD	1237.83	-5.86092	0.549474	-10.6664	1.46155e-26	7.36827e-24
AQP7	38.5097	-8.26841	1.36526	-6.05628	1.39306e-09	5.87757e-08
ARHGAP20	186.005	-1.01545	0.353068	-2.87607	0.00402665	0.026541
ARHGAP28	28.8808	-2.65396	0.726017	-3.65551	0.000256671	0.00275484
ARHGEF15	115.215	-3.60381	0.870215	-4.14128	3.45367e-05	0.000499508
ARHGEF4	60.9602	-1.81333	0.559254	-3.24241	0.00118521	0.00993969
ARL15	197.418	-1.04714	0.382694	-2.73622	0.00621487	0.0371482
ARL4A	188.32	-1.35266	0.27594	-4.90201	9.48599e-07	2.18227e-05
ARL4D	29.1535	-1.31332	0.45749	-2.87071	0.00409552	0.0268345
ARVCF	326.495	-1.31861	0.315922	-4.17385	2.99495e-05	0.000441486
ASAP3	191.38	-1.27245	0.249843	-5.09299	3.52453e-07	8.9512e-06
ASB2	122.398	-1.52806	0.420576	-3.63326	0.000279862	0.00296408
ASPA	17.836	-4.33655	1.27602	-3.3985	0.00067756	0.00623922
ASPN	5129.8	-1.93362	0.352454	-5.48617	4.10736e-08	1.27596e-06
ATP12A	7.5539	-4.3766	1.63177	-2.68212	0.00731564	0.0422535
ATP1B2	68.7674	-1.98955	0.445198	-4.46892	7.86169e-06	0.000140975
ATP6V0E2	163.35	-1.16788	0.34996	-3.33718	0.00084634	0.00753465
ATP6V1C2	29.5589	-2.7964	0.719775	-3.88511	0.000102284	0.00125334
ATP8A1	212.321	-2.03015	0.234782	-8.64698	5.28825e-18	1.03679e-15
AVPR1A	111.338	-2.65346	0.738448	-3.5933	0.000326519	0.00335943
AZGP1	5.80651	-5.52408	1.61748	-3.41523	0.000637271	0.00591824
B3GALNT1	441.659	-1.0367	0.221197	-4.6868	2.77515e-06	5.64141e-05
B3GALT2	35.2574	-2.4469	0.89155	-2.74455	0.00605946	0.0365286
B3GALT4	34.7897	-1.29558	0.465839	-2.78117	0.00541636	0.0334509
BACH2	374.589	-1.9192	0.332916	-5.76483	8.17418e-09	2.91381e-07
BCAM	646.992	-1.00196	0.239958	-4.17556	2.97249e-05	0.000439277
BCAP29	3438.12	-1.01081	0.244178	-4.13963	3.47869e-05	0.000502715
BCHE	28.1803	-8.10882	1.10044	-7.36871	1.72283e-13	1.51997e-11
BCL6B	109.928	-3.20907	0.491534	-6.52868	6.63513e-11	3.59052e-09
BDNF	176.746	-1.90982	0.645439	-2.95895	0.00308687	0.02164
BFSP1	24.8781	-1.77281	0.626833	-2.82821	0.00468095	0.029807
BMP3	11.6756	-3.83669	1.18312	-3.24287	0.00118332	0.00993825
BMP6	80.4928	-2.30967	0.582041	-3.96823	7.24074e-05	0.000933257
BMP7	5.56128	-5.77144	1.5585	-3.7032	0.0002129	0.00234495
BRINP3	12.7171	-5.23589	1.11256	-4.70615	2.52437e-06	5.20965e-05
BST1	89.8654	-1.16045	0.386725	-3.0007	0.00269362	0.0193339
BTC	186.111	-2.31283	0.401476	-5.76082	8.37067e-09	2.96587e-07
C10orf128	115.729	-1.86753	0.41905	-4.45659	8.32743e-06	0.000148394
C10orf71	10.7723	-5.0976	1.29753	-3.92869	8.54102e-05	0.00107494
C12orf75	994.636	-1.08996	0.252605	-4.31487	1.59697e-05	0.000257574
C14orf132	1723.91	-1.03725	0.173957	-5.9627	2.48111e-09	9.88244e-08
C14orf37	173.258	-1.1654	0.255516	-4.56094	5.09247e-06	9.64127e-05
C16orf89	32.5848	-4.21409	0.903057	-4.66647	3.06421e-06	6.15108e-05
C1orf110	129.376	-1.98271	0.281453	-7.04456	1.86047e-12	1.4029e-10
C1orf51	109.678	-1.14349	0.3754	-3.04605	0.0023187	0.0170828
C1orf95	39.5827	-2.15354	0.684861	-3.1445	0.00166372	0.0131466
C1QL3	46.9856	-3.3228	0.75173	-4.4202	9.86097e-06	0.00017092
C1QTNF2	205.334	-1.77916	0.304223	-5.84821	4.96906e-09	1.85368e-07
C1QTNF3	97.4866	-1.57422	0.428267	-3.67579	0.000237115	0.00257629
C1QTNF7	1814.34	-2.60336	0.212508	-12.2506	1.66685e-34	2.45097e-31
C1QTNF9	15.6318	-6.66978	1.15732	-5.76314	8.25634e-09	2.93125e-07
C20orf166-AS1	42.0294	-2.4596	0.659926	-3.72709	0.000193704	0.00215777
C2orf40	230.422	-1.43713	0.333103	-4.31436	1.60067e-05	0.000257935
C3	3117.32	-3.97504	0.663283	-5.99298	2.06024e-09	8.33784e-08
C3orf70	641.648	-1.03041	0.266544	-3.86581	0.000110719	0.00133994
C6	132.543	-4.62619	0.959926	-4.81933	1.44044e-06	3.17707e-05
C6orf141	9.68663	-6.56568	1.42183	-4.61776	3.87902e-06	7.59581e-05
C7	3316.18	-4.00736	0.57646	-6.95167	3.60989e-12	2.5788e-10
C8orf4	148.67	-1.31989	0.388263	-3.39948	0.000675146	0.00623289
CA4	35.793	-6.48056	0.935427	-6.92791	4.2709e-12	3.0265e-10
CA5B	292.62	-1.06108	0.223552	-4.74647	2.06998e-06	4.37947e-05
CABLES1	334.495	-1.38794	0.231118	-6.00535	1.90916e-09	7.79793e-08
CACNA2D3	40.4859	-2.03535	0.65946	-3.08639	0.00202606	0.0152958
CALCRL	420.619	-1.20783	0.280158	-4.31127	1.62322e-05	0.000261091
CAMK2A	5.41042	-5.73206	1.88163	-3.04633	0.00231655	0.0170742
CAMK2G	1960.46	-1.0232	0.170334	-6.007	1.88987e-09	7.73707e-08
CAND2	183.605	-1.05822	0.309656	-3.41742	0.000632172	0.00588017
CAP2	466.901	-1.19234	0.226908	-5.25471	1.48256e-07	4.10027e-06
CAPN6	69.0658	-3.12422	0.72426	-4.31368	1.60562e-05	0.000258496
CARD10	23.9544	-5.92936	0.893648	-6.635	3.24494e-11	1.87114e-09
CARNS1	107.243	-1.59421	0.417546	-3.81805	0.000134508	0.00159395
CASP10	85.871	-1.55109	0.396978	-3.90724	9.3357e-05	0.00116088
CASQ1	60.1509	-1.23128	0.414322	-2.97179	0.00296072	0.0209302
CASQ2	927.813	-2.45511	0.513131	-4.78456	1.71359e-06	3.69185e-05
CASZ1	232.92	-1.04942	0.285149	-3.68027	0.000232991	0.00253912
CAV2	2057.6	-1.11269	0.185807	-5.98841	2.11905e-09	8.55622e-08
CBFA2T3	19.8293	-3.6042	0.838645	-4.29765	1.72621e-05	0.000275397
CBLN1	11.9044	-5.32072	1.46887	-3.62232	0.000291974	0.00306113
CCDC141	236.698	-2.65077	0.44105	-6.01015	1.85356e-09	7.60604e-08
CCDC159	82.949	-1.31778	0.34435	-3.82686	0.000129788	0.0015432
CCDC170	70.5506	-1.36113	0.492591	-2.7632	0.00572374	0.0348919
CCDC178	12.198	-3.90161	1.37841	-2.83052	0.00464727	0.0296032
CCDC180	146.38	-1.11276	0.264942	-4.20003	2.66883e-05	0.000400438
CCDC42	6.98316	-3.63711	1.38892	-2.61866	0.00882755	0.048767
CCDC85A	11.3945	-5.89963	1.25003	-4.71959	2.36321e-06	4.93477e-05
CCDC88C	80.5473	-1.51366	0.513627	-2.94701	0.00320862	0.0222723
CCL15-CCL14	90.2014	-9.78753	0.804425	-12.1671	4.65216e-34	6.31441e-31
CCL21	120.301	-5.33268	1.25842	-4.23759	2.25932e-05	0.000347565
CCL3	25.9656	-2.0936	0.581967	-3.59746	0.000321345	0.00331587
CCNJL	51.9992	-1.32805	0.467127	-2.84301	0.00446893	0.0287265
CCSER1	55.113	-1.88932	0.546275	-3.45854	0.000543105	0.00516887
CD207	5.24224	-5.68209	2.07422	-2.73939	0.00615535	0.03693
CD248	144.96	-1.21198	0.306802	-3.95035	7.8038e-05	0.000999986
CD300LG	13.269	-4.58118	1.4037	-3.26363	0.00109993	0.00932974
CD34	1315.52	-1.61779	0.246981	-6.55025	5.74413e-11	3.14768e-09
CD55	5069.14	-1.50564	0.340388	-4.42329	9.72109e-06	0.000168994
CD69	78.1777	-2.86447	0.567201	-5.05018	4.41398e-07	1.09185e-05
CD96	21.2129	-1.85544	0.568045	-3.26636	0.00108939	0.00925041
CDH2	2786.09	-1.39932	0.182428	-7.67053	1.71287e-14	1.80184e-12
CDH23	4.66175	-5.51113	1.76507	-3.12233	0.00179428	0.0139533
CDH5	231.51	-3.81587	0.455664	-8.37432	5.55459e-17	8.82979e-15
CDH8	104.171	-2.98497	0.513388	-5.81425	6.09064e-09	2.2113e-07
CDKN1C	87.0951	-1.60264	0.28174	-5.68836	1.28263e-08	4.45512e-07
CES1	882.838	-1.08828	0.305698	-3.55999	0.000370873	0.0037416
CFD	322.088	-5.52919	0.646816	-8.54833	1.24888e-17	2.21218e-15
CFI	243.44	-4.09459	0.739477	-5.53715	3.07431e-08	9.84506e-07
CH25H	23.1392	-3.96162	0.871416	-4.54619	5.46267e-06	0.00010265
CHODL	60.8055	-2.35777	0.647647	-3.64052	0.000272086	0.00290088
CHRDL1	455.392	-6.66391	0.767259	-8.68536	3.77556e-18	7.57042e-16
CHST10	116.659	-1.05302	0.273755	-3.84659	0.000119773	0.00143378
CIDEA	13.279	-4.78277	1.45674	-3.2832	0.00102634	0.00879973
CIDEC	31.984	-8.29144	1.56453	-5.29963	1.16039e-07	3.30242e-06
CIITA	171.419	-1.5706	0.34458	-4.558	5.16435e-06	9.76688e-05
CILP	33.6906	-2.73165	0.974007	-2.80455	0.00503869	0.031606
CKB	108.75	-1.91423	0.57172	-3.34819	0.000813415	0.00731535
CLDN5	10.209	-3.92908	1.29034	-3.045	0.00232677	0.0171137
CLEC10A	49.2007	-1.83001	0.599455	-3.0528	0.00226718	0.0167874
CLEC14A	157.935	-3.47473	0.469228	-7.40521	1.3094e-13	1.16102e-11
CLEC1A	38.1401	-3.37264	0.686757	-4.91096	9.06304e-07	2.08769e-05
CLEC3A	42.8418	-4.61676	1.36484	-3.38263	0.000717945	0.0065604
CLEC3B	115.994	-2.17025	0.41619	-5.21456	1.84257e-07	4.97126e-06
CLIC2	200.578	-1.59654	0.319883	-4.99101	6.00644e-07	1.43999e-05
CLIC5	193.965	-5.2459	0.672362	-7.8022	6.08392e-15	6.92585e-13
CLSTN2	36.757	-4.31099	0.523041	-8.24217	1.69121e-16	2.44602e-14
CNN1	5128.2	-1.47678	0.403301	-3.66173	0.000250519	0.00269866
CNTFR	25.5328	-7.96334	0.89233	-8.92421	4.4889e-19	1.08502e-16
CNTN1	79.7547	-1.54649	0.558838	-2.76733	0.00565177	0.0345429
CNTN3	972.741	-1.16737	0.215838	-5.40855	6.35358e-08	1.89905e-06
CNTN4	56.8722	-1.98826	0.504882	-3.93807	8.21386e-05	0.00104194
CNTNAP3	92.1185	-2.246	0.501624	-4.47745	7.55386e-06	0.000136565
COBL	27.473	-4.48253	0.902571	-4.9664	6.82073e-07	1.61329e-05
COCH	52.4731	-1.69936	0.502305	-3.38312	0.000716666	0.00655491
COL12A1	4696.23	-1.17265	0.333679	-3.51431	0.000440892	0.00432197
COL15A1	1720.08	-1.48005	0.366492	-4.03841	5.38139e-05	0.000726509
COL21A1	4834.9	-1.26222	0.177632	-7.1058	1.19625e-12	9.38129e-11
COL25A1	68.3287	-1.82753	0.591313	-3.09063	0.00199731	0.0151516
COL28A1	58.96	-4.66622	1.03214	-4.5209	6.15777e-06	0.000113893
COL6A6	45.3269	-5.25262	0.863746	-6.08121	1.1928e-09	5.13339e-08
COL9A2	173.97	-1.24486	0.389094	-3.19939	0.0013772	0.0112608
COLGALT2	49.4491	-2.99168	0.760988	-3.93131	8.44846e-05	0.00106571
COLQ	177.405	-1.23162	0.292764	-4.20687	2.58936e-05	0.00039084
COPG2IT1	25.8907	-2.49465	0.946138	-2.63666	0.00837265	0.0467073
CORO6	76.0439	-1.43442	0.500343	-2.86687	0.00414551	0.0270917
COX1	205481	-1.50919	0.37033	-4.07525	4.59656e-05	0.000639135
COX3	27528.4	-1.44395	0.414562	-3.48308	0.000495677	0.00477216
CPED1	1648.85	-1.39627	0.190552	-7.32751	2.34474e-13	2.03807e-11
CPNE4	286.519	-2.33272	0.577457	-4.03964	5.35341e-05	0.000723284
CPXM1	12.7991	-3.33896	1.11523	-2.99395	0.0027539	0.019697
CPZ	5.07048	-4.76409	1.57808	-3.01891	0.00253686	0.0184134
CRABP1	4.40534	-5.13442	1.50214	-3.41806	0.000630684	0.00586942
CREB5	56.6264	-2.47624	0.702181	-3.5265	0.000421097	0.0041533
CRIM1	656.098	-1.95969	0.319028	-6.14269	8.11359e-10	3.64286e-08
CRIP1	314.708	-1.40092	0.373022	-3.75558	0.000172942	0.00196621
CRIP2	880.741	-1.23614	0.289702	-4.26693	1.9818e-05	0.000311944
CRISPLD1	4446.68	-2.46036	0.207206	-11.874	1.61607e-32	1.5842e-29
CSRNP3	385.203	-1.57807	0.325505	-4.84808	1.2466e-06	2.79496e-05
CSRP1	9095.76	-1.10908	0.236908	-4.68149	2.84797e-06	5.7629e-05
CTHRC1	247.197	-1.57804	0.374272	-4.21629	2.4835e-05	0.000376473
CTNNA3	164.925	-1.87567	0.369588	-5.07503	3.87433e-07	9.72439e-06
CTNND2	5.7927	-5.82895	2.07187	-2.81337	0.00490247	0.0309053
CTSH	262.027	-1.11228	0.29676	-3.74809	0.000178185	0.00201285
CTSK	653.34	-1.42993	0.205352	-6.96331	3.3238e-12	2.39381e-10
CTTNBP2	157.664	-1.08296	0.325509	-3.32697	0.000877961	0.00773421
CX3CR1	148.558	-3.57184	0.492368	-7.25441	4.03427e-13	3.40597e-11
CXCL11	10.5796	-4.76704	1.69096	-2.81913	0.00481546	0.0305094
CXCL14	441.388	-10.0637	1.21325	-8.29477	1.08793e-16	1.65488e-14
CXCL9	135.218	-1.60749	0.505285	-3.18135	0.00146592	0.0118489
CXorf36	145.074	-4.56169	0.997531	-4.57298	4.80844e-06	9.16252e-05
CXXC4	143.873	-1.44825	0.319678	-4.53035	5.88855e-06	0.000109719
CYGB	37.7636	-3.64258	0.763681	-4.76977	1.8444e-06	3.95436e-05
CYP4B1	6.27663	-4.50814	1.54833	-2.91162	0.00359557	0.0243359
CYS1	200.088	-2.05555	0.340031	-6.0452	1.49226e-09	6.23954e-08
CYSLTR1	133.044	-1.30205	0.432133	-3.01308	0.00258608	0.0186861
CYTB	23738	-1.5683	0.498384	-3.14677	0.00165083	0.0130682
CYTL1	2786.63	-2.16384	0.343176	-6.30532	2.87598e-10	1.39798e-08
CYYR1	198.141	-3.98095	0.488731	-8.14549	3.77756e-16	5.12731e-14
DAB1	7.52141	-4.3214	1.63414	-2.64444	0.00818256	0.0459228
DACH1	14.9547	-6.90221	1.47076	-4.69297	2.69272e-06	5.49285e-05
DACT1	1120.73	-1.11994	0.24416	-4.58689	4.49895e-06	8.66619e-05
DARC	76.9018	-8.39335	0.739653	-11.3477	7.61504e-30	5.84206e-27
DBP	33.7487	-2.11138	0.709241	-2.97696	0.00291119	0.0206463
DCLK1	176.398	-3.12366	0.606301	-5.152	2.57724e-07	6.7371e-06
DCLK2	292.849	-1.06132	0.199511	-5.31961	1.03993e-07	2.98851e-06
DCN	2986.2	-3.7386	0.338774	-11.0357	2.57049e-28	1.61987e-25
DDAH2	425.983	-1.09639	0.278482	-3.93703	8.24964e-05	0.00104572
DENND1B	422.49	-1.01953	0.185374	-5.49984	3.80145e-08	1.19566e-06
DENND2A	31.3685	-4.41525	0.673807	-6.55269	5.65102e-11	3.1063e-09
DES	1857.52	-2.74954	0.538714	-5.10389	3.32737e-07	8.55331e-06
DGCR6	27.7224	-1.68575	0.61599	-2.73665	0.0062069	0.0371364
DGKG	121.618	-1.61762	0.336849	-4.80221	1.56926e-06	3.42694e-05
DGKI	413.105	-1.10408	0.26802	-4.11939	3.79877e-05	0.000543188
DHRS9	22.6262	-2.37893	0.80746	-2.94619	0.00321717	0.0223228
DHX35	57.6433	-1.09146	0.386917	-2.82092	0.00478857	0.03035
DIAPH3	46.3488	-2.17709	0.495004	-4.39812	1.09194e-05	0.000186699
DKK2	50.0204	-2.06355	0.64669	-3.19095	0.00141808	0.011515
DLL4	94.0238	-1.99374	0.540295	-3.6901	0.000224168	0.00245375
DMPK	1009.72	-1.03648	0.264362	-3.9207	8.82933e-05	0.00110885
DNAH14	17.4903	-3.68556	0.910415	-4.04822	5.1609e-05	0.000704286
DNAJB4	2607.21	-1.22653	0.200033	-6.13162	8.69869e-10	3.86621e-08
DNASE1L3	43.7817	-7.86479	0.946614	-8.30833	9.70546e-17	1.48915e-14
DNER	65.2222	-1.12516	0.372304	-3.02215	0.00250988	0.0182475
DNM1	22.4023	-3.20682	0.978383	-3.27768	0.00104665	0.00894338
DNMT3B	32.3238	-1.33388	0.49861	-2.67521	0.00746834	0.0429247
DOC2B	39.501	-4.05328	0.672355	-6.02849	1.65501e-09	6.8551e-08
DPP4	64.0521	-2.60657	0.593442	-4.3923	1.12157e-05	0.00019084
DPT	1705.99	-1.86862	0.374199	-4.99367	5.92437e-07	1.42613e-05
DPY19L2	99.0017	-1.48321	0.32882	-4.5107	6.46147e-06	0.00011864
DRP2	37.8536	-1.87475	0.657268	-2.85234	0.00433988	0.0280811
DSCAML1	7.77571	-6.24831	1.78179	-3.50676	0.000453595	0.00443417
DSG2	105.518	-1.76979	0.523901	-3.3781	0.000729889	0.0066554
DSP	131.274	-1.60685	0.43689	-3.67792	0.000235145	0.00255803
DSTN	1754.46	-1.24494	0.243535	-5.11193	3.18882e-07	8.23818e-06
DTX1	7.48536	-5.89492	1.55637	-3.78761	0.000152101	0.00177619
DUOX1	4.52117	-5.46922	1.96916	-2.77744	0.00547884	0.0337667
DUSP28	29.314	-1.36654	0.448348	-3.04795	0.00230406	0.0169963
DUSP4	86.0847	-1.94908	0.490325	-3.97508	7.0357e-05	0.00091149
DYSF	276.475	-1.98008	0.290891	-6.80695	9.96869e-12	6.4055e-10
EBF2	105.577	-5.39555	0.957389	-5.6357	1.74352e-08	5.83766e-07
EBF3	103.555	-4.8828	0.887604	-5.50111	3.77415e-08	1.18919e-06
ECEL1	4.74615	-5.23816	1.80398	-2.90367	0.00368819	0.0248484
ECM2	3085.26	-1.14012	0.193094	-5.90445	3.53829e-09	1.35724e-07
ECSCR	173.896	-4.03448	0.459959	-8.77138	1.76497e-18	3.8448e-16
EDN1	56.8705	-1.50221	0.5541	-2.71108	0.00670638	0.0394447
EDNRB	218.372	-1.29328	0.358987	-3.60259	0.000315067	0.00326849
EFCAB4A	14.5132	-4.22266	0.85685	-4.92812	8.30238e-07	1.93777e-05
EFCC1	7.95912	-5.98639	1.45738	-4.10763	3.99737e-05	0.000567904
EFHD1	1711.65	-1.56415	0.268067	-5.83494	5.381e-09	1.98221e-07
EGFL7	57.151	-2.8193	0.540482	-5.21626	1.8257e-07	4.94088e-06
EGFL8	76.3371	-1.00051	0.381161	-2.62491	0.00866728	0.048017
EGR2	101.863	-2.77972	0.551462	-5.04063	4.63994e-07	1.13869e-05
EHD3	1944.09	-1.50094	0.251643	-5.96458	2.45263e-09	9.8133e-08
ELOVL7	68.0452	-2.9019	0.707133	-4.10376	4.0649e-05	0.000575644
ELTD1	259.89	-3.36556	0.752572	-4.47208	7.74627e-06	0.00013933
EMCN	320.859	-4.91406	0.864859	-5.68191	1.33196e-08	4.59929e-07
EMID1	6.54114	-3.43448	1.30067	-2.64054	0.00827734	0.0462927
EMILIN3	4.43759	-5.44276	1.58405	-3.43598	0.00059042	0.00553738
EMP1	1103.48	-1.06585	0.243139	-4.38371	1.16674e-05	0.000197763
EMX2OS	12.1454	-5.78943	1.01738	-5.69053	1.26644e-08	4.40754e-07
ENPEP	83.8654	-2.26316	0.562899	-4.02054	5.80647e-05	0.000774876
ENTPD1	1077.39	-1.28851	0.187867	-6.85863	6.95257e-12	4.66457e-10
ENTPD3	4.92949	-5.58826	1.57149	-3.55603	0.000376505	0.00378543
EPB41L4B	46.4302	-3.14098	0.87983	-3.56999	0.000357001	0.00362235
EPHA3	266.654	-1.57283	0.296723	-5.30068	1.15371e-07	3.28871e-06
EPHA5	27.5711	-3.50938	0.973442	-3.60512	0.000312009	0.0032461
EPHA7	40.7882	-3.96066	0.748658	-5.29035	1.22085e-07	3.46333e-06
EPHB3	44.3174	-1.55913	0.545252	-2.85947	0.0042435	0.0275586
EPHB4	140.158	-1.80473	0.342735	-5.26567	1.39678e-07	3.89355e-06
ERBB3	60.1401	-4.71563	0.762568	-6.18388	6.25457e-10	2.87053e-08
ESR1	390.365	-1.21069	0.20641	-5.86549	4.47809e-09	1.68477e-07
EXOC3L2	5.29966	-5.69679	1.87909	-3.03167	0.00243208	0.0177404
F10	27.3247	-1.4518	0.522557	-2.77826	0.00546509	0.0336937
F8	204.873	-1.848	0.274431	-6.73393	1.65144e-11	9.9453e-10
FABP3	131.093	-1.8305	0.456574	-4.00921	6.09229e-05	0.000804027
FABP4	553.066	-4.36269	0.846361	-5.15465	2.54107e-07	6.67221e-06
FAM107A	191.011	-3.00461	0.455522	-6.59597	4.22474e-11	2.39696e-09
FAM110D	8.5233	-6.38247	1.43499	-4.44776	8.67711e-06	0.000153568
FAM117A	173.82	-1.15158	0.266679	-4.31821	1.57298e-05	0.000254168
FAM124B	19.9779	-2.9148	0.874389	-3.33353	0.000857524	0.00761118
FAM133A	23.3423	-2.15437	0.590814	-3.64644	0.000265899	0.00283835
FAM134B	121.888	-1.29887	0.484169	-2.68267	0.0073036	0.0421978
FAM13C	281.006	-1.32097	0.297776	-4.43612	9.15951e-06	0.000160656
FAM162B	16.7082	-6.46264	1.10884	-5.82827	5.60054e-09	2.0545e-07
FAM26E	945.899	-1.46765	0.172454	-8.51038	1.73363e-17	2.94134e-15
FAM46B	260.86	-1.08213	0.380215	-2.84609	0.0044259	0.0285042
FAM69B	16.8148	-6.77459	0.934393	-7.25026	4.15971e-13	3.47858e-11
FAM84B	143.161	-1.8253	0.341576	-5.34374	9.10473e-08	2.64667e-06
FAXC	144.033	-1.32966	0.35613	-3.73363	0.000188736	0.00211579
FBLN1	2482.61	-1.64353	0.271681	-6.04947	1.45319e-09	6.09061e-08
FBLN2	579.033	-1.22655	0.253355	-4.84123	1.29038e-06	2.87848e-05
FBN2	98.558	-1.44508	0.457936	-3.15563	0.00160153	0.0127465
FBXL22	142.793	-3.08102	0.451172	-6.82891	8.55598e-12	5.63322e-10
FCRL6	5.42715	-4.79797	1.6376	-2.92989	0.00339086	0.0232808
FGD5	543.576	-1.44363	0.337806	-4.27355	1.92387e-05	0.000303637
FGF10	37.7227	-3.28762	0.786753	-4.17872	2.93157e-05	0.00043432
FGF10-AS1	4.96052	-5.60519	1.55616	-3.60193	0.000315863	0.00327462
FGF12	19.6237	-5.86263	0.897022	-6.53567	6.33266e-11	3.43815e-09
FGF9	9.77496	-5.98848	1.35171	-4.4303	9.41035e-06	0.000164077
FGFR2	149.149	-1.13449	0.262888	-4.31549	1.59251e-05	0.000257089
FGL2	20316.2	-1.13267	0.207685	-5.4538	4.93044e-08	1.50515e-06
FHL1	12301.3	-1.39191	0.318728	-4.36708	1.2592e-05	0.000210603
FILIP1	1737.89	-1.02314	0.232473	-4.4011	1.07704e-05	0.000184509
FILIP1L	8502.5	-1.69426	0.235739	-7.18703	6.62168e-13	5.33514e-11
FLRT2	124.319	-2.32913	0.378668	-6.15085	7.70694e-10	3.48607e-08
FLRT3	19.6559	-3.1554	0.870516	-3.62475	0.000289241	0.00303609
FLT1	648.835	-2.5413	0.570445	-4.45494	8.39167e-06	0.000149159
FLT4	46.2421	-3.34937	0.666021	-5.02892	4.93243e-07	1.20045e-05
FNDC1	416.41	-2.68537	0.454721	-5.90553	3.51511e-09	1.35129e-07
FNDC5	80.5569	-2.07164	0.473047	-4.37934	1.19037e-05	0.000201188
FOS	2943.25	-2.85011	0.396515	-7.1879	6.5797e-13	5.32563e-11
FRAS1	21.4936	-2.6823	0.925725	-2.89752	0.0037613	0.0252436
FREM1	1170.64	-1.50895	0.365567	-4.12771	3.66394e-05	0.000525612
FRMD5	19.7145	-2.46999	0.857154	-2.88161	0.00395644	0.0262055
FRMD7	42.8631	-5.02309	0.674813	-7.44367	9.79224e-14	8.81552e-12
FRZB	5725.8	-1.04014	0.246665	-4.2168	2.47795e-05	0.000376473
FSCN1	151.616	-1.16626	0.310412	-3.75713	0.000171874	0.00195673
FST	79.9267	-1.29988	0.46558	-2.79196	0.00523904	0.0325618
FUT1	20.785	-3.51768	0.852124	-4.12813	3.65722e-05	0.000525075
FXYD6	70.5876	-3.03609	0.534244	-5.68296	1.32379e-08	4.58007e-07
FZD10-AS1	6.86983	-4.84654	1.1389	-4.25547	2.08613e-05	0.000323745
FZD7	324.994	-1.19927	0.282155	-4.2504	2.1339e-05	0.000330576
FZD8	177.943	-1.1394	0.29174	-3.90555	9.40114e-05	0.00116655
GABRB1	24.343	-2.99903	0.907114	-3.30612	0.000945961	0.00821027
GADL1	14.0318	-2.59674	0.885426	-2.93276	0.00335964	0.0231114
GALM	237.855	-1.11195	0.232645	-4.77959	1.75652e-06	3.77973e-05
GALNT16	146.097	-1.48504	0.344504	-4.31067	1.62762e-05	0.000261561
GAREM	796.549	-1.09577	0.245971	-4.45488	8.39417e-06	0.000149159
GAS6	5014.76	-1.23216	0.369572	-3.33403	0.000855969	0.00760119
GATM	230.001	-1.58143	0.283334	-5.5815	2.38454e-08	7.79171e-07
GBP4	456.857	-1.75212	0.331795	-5.28073	1.28667e-07	3.62672e-06
GDF10	116.233	-1.09235	0.369701	-2.95468	0.00312991	0.0218947
GEM	4280.89	-1.99435	0.21077	-9.46222	3.01487e-21	9.17197e-19
GFRA1	698.75	-2.59024	0.420705	-6.1569	7.41846e-10	3.37368e-08
GIMAP1	118.77	-2.1215	0.503071	-4.2171	2.47464e-05	0.000376422
GIMAP4	556.287	-1.75975	0.438092	-4.01685	5.89808e-05	0.000783083
GIMAP5	185.054	-1.4726	0.389773	-3.77809	0.000158033	0.00183453
GIMAP6	197.428	-1.79065	0.37969	-4.71609	2.40419e-06	5.00259e-05
GIMAP7	129.661	-2.32312	0.453645	-5.121	3.03925e-07	7.87482e-06
GIMAP8	344.471	-2.52305	0.374317	-6.74041	1.5794e-11	9.57678e-10
GIPC3	35.4538	-3.01937	0.550621	-5.48356	4.16844e-08	1.29039e-06
GNB4	3961.76	-1.0039	0.183037	-5.48466	4.14276e-08	1.28469e-06
GPC3	137.308	-2.64871	0.446333	-5.93437	2.94974e-09	1.14897e-07
GPD1	33.568	-4.16864	0.755314	-5.51909	3.40759e-08	1.07948e-06
GPD1L	819.561	-1.2978	0.221757	-5.85238	4.84598e-09	1.8193e-07
GPIHBP1	40.4959	-6.44011	0.850948	-7.56816	3.78542e-14	3.7315e-12
GPLD1	524.11	-1.4118	0.237268	-5.95024	2.67748e-09	1.05692e-07
GPM6A	53.1637	-4.99718	0.772195	-6.47139	9.71051e-11	5.09946e-09
GPR1	3.64335	-5.15888	1.86318	-2.76886	0.00562524	0.0344544
GPR116	475.408	-2.98208	0.699981	-4.26024	2.04208e-05	0.00031859
GPR124	243.725	-1.28247	0.267587	-4.79273	1.64526e-06	3.5664e-05
GPR126	188.604	-2.85623	0.441147	-6.47455	9.50947e-11	5.00879e-09
GPR133	51.1245	-3.36008	0.675307	-4.97564	6.50333e-07	1.54651e-05
GPR153	38.1751	-1.02919	0.383523	-2.68351	0.00728537	0.0421063
GPRC5B	369.594	-1.93526	0.309081	-6.26135	3.81667e-10	1.81036e-08
GRASP	67.7496	-2.27918	0.39471	-5.77431	7.72682e-09	2.77113e-07
GREM2	10.1338	-5.01669	1.33615	-3.75458	0.000173633	0.00197153
GRIA1	1193.1	-1.32305	0.408535	-3.23852	0.00120152	0.0100383
GRIA2	1973.87	-1.34186	0.254947	-5.2633	1.41495e-07	3.93178e-06
GRIK3	40.1236	-8.32846	1.0206	-8.16034	3.34076e-16	4.64156e-14
GRIN2A	197.12	-3.52613	0.416388	-8.46838	2.48832e-17	4.18156e-15
GRIP1	24.156	-2.59423	0.747879	-3.46878	0.000522825	0.00498931
GRIP2	33.4614	-2.26355	0.709319	-3.19115	0.00141707	0.011512
GSG1L	1033.84	-1.97866	0.293259	-6.74715	1.50777e-11	9.20572e-10
GUCY1A2	227.778	-2.83142	0.718244	-3.94214	8.07566e-05	0.00102885
GYG2	55.5426	-2.03641	0.644731	-3.15854	0.0015856	0.0126655
H19	508.74	-3.35445	0.546346	-6.13979	8.26282e-10	3.70044e-08
HAND2	420.6	-1.45305	0.183956	-7.8989	2.81378e-15	3.35468e-13
HAND2-AS1	191.503	-1.40148	0.273337	-5.12727	2.93967e-07	7.62801e-06
HAS1	6.87454	-6.07579	1.63813	-3.70898	0.000208095	0.00229602
HBB	111.909	-1.6973	0.471104	-3.60282	0.000314784	0.00326849
HBEGF	249.266	-1.4406	0.384135	-3.75024	0.000176666	0.00200082
HCFC1R1	162.641	-2.14586	0.435942	-4.92235	8.55109e-07	1.98793e-05
HCP5	95.5791	-2.26923	0.411401	-5.51585	3.47105e-08	1.09761e-06
HEG1	3252.79	-1.20127	0.17438	-6.88885	5.62461e-12	3.87681e-10
HEY1	37.7731	-1.56333	0.408946	-3.82282	0.000131932	0.00156553
HHEX	67.7683	-1.70833	0.399052	-4.28097	1.86079e-05	0.000294502
HLA-DMB	176.557	-1.28797	0.35527	-3.62532	0.000288609	0.00303315
HLA-DOA	185.47	-1.48583	0.378384	-3.92677	8.60945e-05	0.00108201
HLA-DQA2	53.507	-2.10904	0.672115	-3.13792	0.00170152	0.0133853
HLF	1072.85	-1.70092	0.277104	-6.13821	8.34584e-10	3.72816e-08
HMCN1	21468	-1.20392	0.175048	-6.87767	6.0841e-12	4.16101e-10
HMCN2	31.5298	-6.47174	0.954631	-6.77931	1.20752e-11	7.55559e-10
HOXB3	75.19	-2.08127	0.456022	-4.56397	5.01954e-06	9.52362e-05
HOXB-AS1	36.8234	-1.66401	0.564905	-2.94564	0.00322285	0.0223535
HOXD8	15.6992	-5.4359	1.19077	-4.56502	4.99454e-06	9.49662e-05
HRASLS5	28.637	-2.17111	0.733604	-2.95951	0.00308125	0.0216264
HSPA12A	396.002	-1.00176	0.245482	-4.08079	4.48839e-05	0.000625573
HSPA12B	36.9366	-4.60813	0.927088	-4.97054	6.6767e-07	1.58347e-05
HTRA3	58.6555	-2.40804	0.757805	-3.17765	0.00148475	0.0119791
HYAL1	19.8584	-1.85995	0.691936	-2.68803	0.00718742	0.0417041
HYAL2	141.466	-1.1763	0.283554	-4.14842	3.34778e-05	0.000486168
ICA1	78.501	-3.05243	0.531852	-5.73925	9.50991e-09	3.34268e-07
ICAM2	56.1918	-2.07315	0.600894	-3.4501	0.000560371	0.00531599
ID4	3726.99	-1.72842	0.257257	-6.71865	1.83418e-11	1.09709e-09
IFI27	48.6147	-2.91267	0.673586	-4.32413	1.53135e-05	0.000248351
IFI44L	1398.97	-2.11263	0.587451	-3.59626	0.000322821	0.00332527
IGF1	315.821	-3.38854	0.649783	-5.21488	1.83939e-07	4.9703e-06
IGF2	473.634	-4.41012	0.562017	-7.84695	4.26293e-15	4.94864e-13
IGFBP6	351.537	-1.49571	0.330501	-4.52558	6.02311e-06	0.000111871
IGFBPL1	439.117	-1.29348	0.32415	-3.99037	6.59691e-05	0.00086288
IGHM	63.3431	-2.14255	0.785042	-2.72922	0.00634848	0.0377168
IGJ	374.532	-2.50511	0.834865	-3.00061	0.00269437	0.0193339
IGSF3	209.122	-1.12002	0.305581	-3.66522	0.000247122	0.00266566
IL12RB2	26.4712	-2.94345	0.907195	-3.24456	0.00117632	0.00990277
IL16	207.627	-1.617	0.272051	-5.94375	2.78578e-09	1.09477e-07
IL17RD	377.636	-1.02025	0.226548	-4.50344	6.68615e-06	0.000122281
IL31RA	106.154	-3.30718	0.88531	-3.73562	0.000187253	0.00210628
IMPG2	38.4416	-1.90368	0.589	-3.23206	0.00122902	0.0102292
INHBA-AS1	31.7399	-1.56793	0.587115	-2.67057	0.00757222	0.0433382
IQCH-AS1	69.1243	-1.14521	0.406706	-2.81583	0.0048652	0.0307143
IRF4	28.137	-1.52122	0.477016	-3.18904	0.00142748	0.0115753
ISL1	8.98125	-4.24698	1.34615	-3.15491	0.00160545	0.0127662
ISLR	774.504	-1.24592	0.232298	-5.36347	8.16365e-08	2.39282e-06
ITGA6	579.059	-3.01127	0.332256	-9.0631	1.26792e-19	3.38976e-17
ITGB4	182.658	-4.81564	0.342892	-14.0442	8.36456e-45	2.45988e-41
ITGB8	264.461	-2.1886	0.369633	-5.92102	3.19954e-09	1.24352e-07
ITIH5	1205.32	-1.14465	0.379757	-3.01417	0.00257679	0.0186572
ITLN1	236.997	-7.1142	1.53929	-4.62175	3.80526e-06	7.50209e-05
ITM2A	278.8	-2.46295	0.270477	-9.10596	8.55061e-20	2.32116e-17
JAG2	43.3139	-3.25652	0.695695	-4.68097	2.85525e-06	5.77101e-05
JUN	2283.63	-1.50574	0.257736	-5.84218	5.15223e-09	1.9099e-07
KANK3	20.0886	-3.46522	0.856173	-4.04733	5.18048e-05	0.000706411
KANK4	24.2508	-7.89001	1.04843	-7.52554	5.25013e-14	5.00749e-12
KAZALD1	104.313	-1.59351	0.316327	-5.03754	4.71545e-07	1.15241e-05
KCNA4	20.8465	-2.94467	0.916489	-3.21299	0.00131362	0.0108515
KCNA6	182.189	-1.65297	0.428131	-3.86089	0.000112973	0.00136069
KCNAB1	109.214	-1.55795	0.556275	-2.80068	0.00509948	0.0319079
KCNB1	78.3429	-1.64691	0.513692	-3.20603	0.0013458	0.0110501
KCND2	11.1683	-5.52022	1.56347	-3.53075	0.00041439	0.00409401
KCNH2	14.9345	-4.33077	1.36455	-3.17376	0.00150478	0.0121242
KCNIP2	68.3068	-2.42318	0.648204	-3.7383	0.000185271	0.00208622
KCNJ12	14.0943	-2.62809	0.973606	-2.69934	0.00694781	0.0405806
KCNJ3	206.655	-1.59051	0.351582	-4.52386	6.07219e-06	0.000112546
KCNK5	13.6405	-4.10458	1.09105	-3.76205	0.000168529	0.00192846
KCNMA1	3909.77	-1.01775	0.237403	-4.28703	1.81082e-05	0.000287855
KCNMB2	6.97681	-6.09749	1.77307	-3.43895	0.000583971	0.00548678
KCNMB4	82.3996	-1.2628	0.475286	-2.65693	0.00788564	0.0447402
KCNN3	122.152	-3.19765	0.33103	-9.65972	4.47068e-22	1.4884e-19
KDR	426.361	-3.25081	0.689435	-4.71517	2.41506e-06	5.01928e-05
KIAA0754	1901.59	-1.03027	0.147515	-6.98414	2.86603e-12	2.10713e-10
KIAA1683	82.0729	-1.97695	0.446905	-4.42366	9.7043e-06	0.000168868
KIF26A	40.4631	-5.54353	0.728771	-7.60669	2.81211e-14	2.83541e-12
KL	47.6832	-1.15417	0.441707	-2.61299	0.00897546	0.049414
KLF2	268.554	-2.10609	0.326577	-6.44899	1.12598e-10	5.86077e-09
KLF4	548.398	-1.35277	0.321649	-4.20574	2.60225e-05	0.000392451
KLHL14	6.12308	-5.90707	2.0114	-2.93679	0.00331626	0.0229113
KLHL23	168.947	-1.31276	0.268763	-4.88444	1.03726e-06	2.3616e-05
KLHL3	270.439	-1.08216	0.258842	-4.18078	2.90515e-05	0.000431425
KLHL30	136.236	-1.15848	0.436379	-2.65476	0.00793641	0.0449229
KLHL4	25.3564	-1.84246	0.666834	-2.76299	0.00572739	0.0348919
KRT222	11.4026	-6.80064	1.5197	-4.47499	7.64164e-06	0.000137696
L1CAM	29.9879	-5.79697	0.894116	-6.48346	8.96399e-11	4.74984e-09
LBH	2227.34	-1.22555	0.260287	-4.70847	2.49581e-06	5.16884e-05
LCAT	79.4109	-1.25262	0.382685	-3.27325	0.00106319	0.00905404
LCN10	13.6784	-4.61947	1.08513	-4.25706	2.07137e-05	0.000322874
LDB2	315.113	-3.50278	0.357111	-9.80867	1.03326e-22	3.64637e-20
LDB3	2087.41	-2.19382	0.370977	-5.91365	3.34616e-09	1.28915e-07
LDOC1	962.527	-1.17305	0.251293	-4.66804	3.04084e-06	6.11112e-05
LEFTY2	365.575	-2.23389	0.606591	-3.68269	0.000230782	0.00251833
LGI1	38.9491	-3.69376	0.684218	-5.39851	6.71962e-08	1.99609e-06
LGI2	368.793	-2.30537	0.268983	-8.57067	1.02883e-17	1.91091e-15
LGI4	36.4196	-2.07405	0.544697	-3.80771	0.000140257	0.00164989
LGR5	106.829	-1.15519	0.4113	-2.80863	0.00497532	0.0312975
LHFP	2396.36	-1.17583	0.176793	-6.65088	2.91352e-11	1.69109e-09
LHX6	54.4739	-5.40449	0.688147	-7.85369	4.03967e-15	4.752e-13
LIMS2	1235.9	-1.3164	0.311495	-4.22607	2.37805e-05	0.000362982
LINC00310	83.4673	-1.29317	0.308144	-4.19663	2.70914e-05	0.000405796
LINC00327	16.3604	-3.26022	0.975821	-3.341	0.000834778	0.00744674
LINC00639	14.167	-2.70366	0.969548	-2.78858	0.00529392	0.0328335
LINC00670	209.445	-1.82519	0.339294	-5.37937	7.47468e-08	2.20185e-06
LINC00702	472.28	-1.20543	0.282492	-4.26715	1.97985e-05	0.000311915
LINC00893	112.358	-1.00718	0.304805	-3.30433	0.000952051	0.00825906
LINC00924	29.5091	-3.79212	0.68528	-5.53368	3.1359e-08	1.00241e-06
LINC00982	276.068	-1.47521	0.403953	-3.65194	0.00026027	0.00278669
LINC01018	38.1237	-2.43328	0.644032	-3.7782	0.000157968	0.00183453
LINC01099	25.1515	-3.23991	0.88379	-3.66593	0.000246446	0.00266129
LINC01116	5.2972	-5.10352	1.64548	-3.10155	0.00192513	0.0147243
LINC01139	4.02768	-4.99524	1.85476	-2.6932	0.00707702	0.0412013
LINC01140	91.124	-1.16219	0.367697	-3.16073	0.00157374	0.0126049
LINC01197	47.5705	-1.16172	0.440656	-2.63634	0.00838052	0.0467181
LINGO1	10.3407	-4.29436	1.31958	-3.25433	0.0011366	0.00960976
LIPE	28.2382	-3.55754	0.916261	-3.88266	0.000103318	0.00126177
LMO3	486.509	-1.95226	0.257121	-7.59277	3.13134e-14	3.13935e-12
LOC100130992	38.1695	-1.57272	0.573724	-2.74124	0.00612074	0.0367474
LOC100131825	41.9986	-8.68193	0.85072	-10.2054	1.87562e-24	7.87984e-22
LOC100499484-C9ORF174	34.7379	-1.05889	0.405819	-2.60926	0.00907384	0.0498158
LOC100505504	15.6431	-3.0132	0.971237	-3.10243	0.00191939	0.0147059
LOC100506731	21.9371	-2.37787	0.81923	-2.90257	0.00370117	0.0249169
LOC100506870	194.082	-2.24307	0.290418	-7.7236	1.13093e-14	1.2472e-12
LOC100507236	5.10363	-5.63967	1.89926	-2.96941	0.00298375	0.021061
LOC100507403	39.6588	-2.62672	0.561522	-4.67787	2.89872e-06	5.84548e-05
LOC100652768	45.7018	-1.15263	0.411716	-2.79957	0.0051171	0.0319955
LOC100996455	6.68738	-5.43845	1.61831	-3.36057	0.000777829	0.0070492
LOC100996598	8.17408	-3.8085	1.40494	-2.71079	0.00671222	0.0394659
LOC101054525	43.6357	-1.83496	0.454664	-4.03585	5.44045e-05	0.0007328
LOC101926956	4.7483	-5.54275	1.90542	-2.90894	0.00362652	0.0245172
LOC101927032	23.4669	-2.52066	0.807947	-3.11984	0.0018095	0.0140469
LOC101927119	65.4408	-1.67941	0.442887	-3.79196	0.000149465	0.00174656
LOC101927249	90.4726	-1.77637	0.515984	-3.44268	0.000575991	0.00543786
LOC101927426	6.12874	-5.90296	1.55307	-3.80083	0.000144209	0.00168962
LOC101927562	48.9389	-1.22627	0.461885	-2.65493	0.00793247	0.0449229
LOC101927703	99.569	-1.06597	0.398003	-2.6783	0.00739974	0.0425998
LOC101927825	88.5971	-1.66008	0.35072	-4.73334	2.20856e-06	4.65036e-05
LOC101928166	14.1403	-3.97938	0.963197	-4.13143	3.60514e-05	0.00051878
LOC101928264	4.22538	-5.36623	1.97387	-2.71863	0.00655525	0.0387755
LOC101928281	5.05587	-5.01886	1.78677	-2.8089	0.00497119	0.0312827
LOC101928334	34.312	-2.1606	0.700495	-3.08439	0.00203967	0.0153738
LOC101928433	82.2778	-1.14636	0.41949	-2.73274	0.00628093	0.037403
LOC101928439	75.3305	-1.63625	0.443131	-3.69247	0.000222088	0.00243249
LOC101928489	37.7289	-1.43925	0.45566	-3.15861	0.00158522	0.0126655
LOC101928558	9.19916	-5.60029	1.24449	-4.50006	6.79328e-06	0.000123958
LOC101928584	26.4778	-2.94893	1.01778	-2.89741	0.00376258	0.0252436
LOC101928714	46.8117	-1.42089	0.399995	-3.55226	0.000381942	0.00382701
LOC101929042	13.3643	-3.34327	1.03984	-3.21517	0.00130367	0.0107837
LOC101929130	31.9288	-3.37488	0.807867	-4.17751	2.94712e-05	0.000436257
LOC101929500	487.217	-1.34816	0.246599	-5.46703	4.5764e-08	1.4142e-06
LOC101929722	6.65555	-6.02239	1.85975	-3.23828	0.00120254	0.0100393
LOC101930232	140.955	-1.16017	0.348856	-3.32563	0.000882196	0.00775216
LOC102467080	51.7805	-2.40727	0.67776	-3.5518	0.000382601	0.00383144
LOC102723601	3.97064	-5.27993	1.98645	-2.65797	0.0078613	0.0446596
LOC102723717	4.14467	-5.34336	1.96764	-2.71562	0.0066152	0.0390385
LOC102724147	30.9659	-1.85011	0.5805	-3.18709	0.00143711	0.011648
LOC102724287	16.773	-3.89823	1.05536	-3.69376	0.000220962	0.00242166
LOC102724348	58.4107	-2.54318	0.622069	-4.08826	4.34618e-05	0.000607673
LOC102724488	9.96034	-4.29939	1.20549	-3.56649	0.00036179	0.00366463
LOC102724783	113.526	-3.03136	0.759888	-3.98922	6.62898e-05	0.000865151
LOC102724804	1363.11	-1.99063	0.258704	-7.69465	1.41883e-14	1.54538e-12
LOC102724841	187.629	-1.37008	0.310644	-4.41044	1.0316e-05	0.000177934
LOC102724854	5.79601	-4.54832	1.6621	-2.73648	0.00620996	0.0371364
LOC284825	21.0658	-4.87519	1.84406	-2.64372	0.00820005	0.0459771
LOC646588	14.0665	-4.54759	1.15475	-3.93816	8.21074e-05	0.00104194
LOC646903	48.7869	-1.25093	0.473833	-2.64001	0.00829028	0.0463505
LOC653513	562.863	-1.68655	0.283969	-5.9392	2.86422e-09	1.1206e-07
LOC730101	207.648	-1.13058	0.202719	-5.5771	2.44557e-08	7.96164e-07
LONRF2	1075.72	-1.00538	0.225975	-4.44907	8.62448e-06	0.00015279
LPAR4	67.9362	-1.66324	0.447352	-3.71796	0.000200836	0.00222877
LPHN3	117.658	-2.08082	0.47128	-4.41525	1.00895e-05	0.000174368
LPL	790.819	-4.12265	0.860806	-4.7893	1.67366e-06	3.61909e-05
LPP-AS2	75.4661	-1.00728	0.362972	-2.77508	0.00551882	0.0339538
LPPR4	38.059	-5.68809	0.909286	-6.25556	3.9609e-10	1.86872e-08
LRMP	36.2282	-1.50645	0.538516	-2.79741	0.00515148	0.0321534
LRRC17	649.404	-1.46868	0.225792	-6.50458	7.79091e-11	4.16577e-09
LRRC2	29.3547	-8.16886	2.06441	-3.95699	7.58993e-05	0.000974704
LRRN1	427.288	-1.56596	0.314499	-4.97924	6.38348e-07	1.52006e-05
LRRN2	11.724	-3.66427	1.13181	-3.23754	0.00120565	0.0100584
LRRN4CL	28.9919	-3.60942	0.895993	-4.0284	5.61571e-05	0.000754558
LSAMP	74.3354	-9.50666	0.797803	-11.9161	9.76228e-33	1.01327e-29
LTBP1	544.015	-2.43903	0.305461	-7.98474	1.40822e-15	1.81372e-13
MAB21L1	68.6126	-1.40235	0.502746	-2.78939	0.00528081	0.0327637
MAMDC2	236.145	-2.11496	0.298988	-7.07373	1.5082e-12	1.1621e-10
MAP2K6	44.0587	-2.1894	0.696339	-3.14415	0.0016657	0.0131563
2023-03-01	82.4697	-1.18399	0.375741	-3.15107	0.00162675	0.0129038
MASP1	339.918	-2.43637	0.417076	-5.84155	5.17166e-09	1.91308e-07
MATN2	108.128	-2.27045	0.430883	-5.26929	1.36955e-07	3.82368e-06
MB21D2	105.521	-1.0382	0.362889	-2.86091	0.00422421	0.0274942
MCAM	14104.6	-1.00047	0.238859	-4.18852	2.80775e-05	0.000419143
MCTP1	70.7827	-2.26108	0.578073	-3.91141	9.17598e-05	0.00114521
MDFI	10.7368	-4.18725	1.20915	-3.46297	0.000534246	0.0050873
MDGA2	4.66699	-5.5163	2.10574	-2.61964	0.00880216	0.0486795
MDH1B	13.711	-2.45154	0.896437	-2.73476	0.00624255	0.0372408
MEGF10	156.949	-2.45681	0.473977	-5.18339	2.17889e-07	5.81641e-06
MEGF6	1062.14	-1.2006	0.270142	-4.44434	8.81638e-06	0.000155365
MEOX1	57.5532	-5.98133	0.792371	-7.54865	4.39805e-14	4.26393e-12
MEOX2	296.601	-1.75058	0.401428	-4.36087	1.29546e-05	0.000215036
MFAP5	785.16	-2.02981	0.669096	-3.03365	0.00241612	0.0176678
MFSD4	20.0667	-2.59735	0.645325	-4.02487	5.70076e-05	0.000763201
MGARP	101.887	-1.41966	0.300875	-4.71842	2.37685e-06	4.9574e-05
MGAT3	24.8981	-2.74074	0.824051	-3.32594	0.000881223	0.00774907
MGAT4C	148.894	-1.40153	0.407514	-3.43921	0.000583415	0.00548678
MGLL	1033.43	-1.03136	0.20989	-4.91381	8.93239e-07	2.06298e-05
MIR100	5.37011	-5.11416	1.9436	-2.63128	0.00850628	0.0472805
MIR133A1	5.19719	-5.67462	1.85868	-3.05304	0.00226539	0.0167874
MIR143	48.528	-1.01772	0.389559	-2.6125	0.00898814	0.049453
MIR143HG	770.174	-1.0282	0.264471	-3.88775	0.000101177	0.00124322
MIR145	45.5539	-1.24002	0.467374	-2.65316	0.00797414	0.0450396
MIR198	1326.1	-1.07069	0.201484	-5.314	1.07245e-07	3.07199e-06
MIR22	48.8006	-1.85274	0.656528	-2.82203	0.00477202	0.0302559
MIR675	33.6147	-2.15682	0.635325	-3.39483	0.000686713	0.00630439
MIR6837	5.33167	-4.08985	1.48889	-2.74691	0.00601594	0.036291
MIR6872	4.62036	-5.50114	1.93731	-2.83957	0.00451739	0.0289326
MIXL1	5.55122	-4.49491	1.4406	-3.12017	0.00180745	0.0140372
MKX	556.176	-1.35014	0.245814	-5.49252	3.96239e-08	1.23965e-06
MMP16	837.926	-1.05136	0.223837	-4.69699	2.64025e-06	5.41712e-05
MMP28	63.0455	-2.39602	0.447398	-5.35545	8.53443e-08	2.49735e-06
MMRN1	575.153	-7.46311	0.915878	-8.14858	3.68227e-16	5.03672e-14
MN1	544.442	-1.52496	0.237518	-6.42041	1.3591e-10	6.99166e-09
MPC1	610.338	-1.12381	0.233947	-4.80371	1.55749e-06	3.40543e-05
MPL	29.1595	-1.68683	0.436066	-3.86828	0.000109606	0.00132921
MPP7	1759.74	-1.18918	0.175256	-6.78536	1.15801e-11	7.32367e-10
MPPED2	566.04	-1.21757	0.193095	-6.30554	2.87185e-10	1.39798e-08
MPZ	115.979	-3.70798	0.773341	-4.79476	1.62872e-06	3.53489e-05
MPZL2	80.3995	-3.94544	0.874291	-4.51273	6.39981e-06	0.000117875
MRAP2	2427.25	-1.11904	0.192187	-5.82267	5.79158e-09	2.11579e-07
MRGPRF	169.295	-2.21111	0.432025	-5.118	3.08787e-07	7.98907e-06
MTTP	61.4908	-3.16834	0.622242	-5.09181	3.54666e-07	8.9915e-06
MTUS2	1305.87	-1.3706	0.190066	-7.21118	5.54687e-13	4.55231e-11
MXRA5	1033.86	-1.75935	0.288909	-6.08964	1.13164e-09	4.91817e-08
MYBL1	548.156	-1.20485	0.282811	-4.26027	2.04179e-05	0.00031859
MYCT1	18.6083	-4.61773	1.00651	-4.58788	4.47771e-06	8.64232e-05
MYH10	46048	-2.03162	0.360236	-5.63967	1.70373e-08	5.71528e-07
MYO3A	19.0562	-2.89018	1.0371	-2.7868	0.00532317	0.0329807
MYO5B	573.528	-1.15008	0.354934	-3.24026	0.0011942	0.00999129
MYO5C	137.384	-4.48426	0.571115	-7.85175	4.10259e-15	4.79406e-13
MYOC	268.515	-1.68712	0.635484	-2.65486	0.00793405	0.0449229
MYOCD	203.971	-1.44161	0.331784	-4.34502	1.39265e-05	0.000229443
MYOM1	651.156	-1.72918	0.330666	-5.22939	1.70073e-07	4.63823e-06
MYRIP	52.1827	-6.47702	0.71688	-9.03502	1.63979e-19	4.25501e-17
N6AMT1	159.641	-1.21011	0.20995	-5.76379	8.22469e-09	2.9259e-07
NAA38	61.3945	-1.18123	0.408572	-2.89111	0.00383889	0.0256289
NAALAD2	14.338	-4.75559	1.27395	-3.73296	0.000189244	0.00211866
NAP1L3	352.919	-1.16078	0.208956	-5.55514	2.77392e-08	8.94804e-07
NAT8L	8.93302	-6.15605	1.71902	-3.58114	0.000342103	0.00348926
NCAM1	376.997	-1.60349	0.330826	-4.84692	1.25394e-06	2.80784e-05
NCKAP5	64.0135	-1.53102	0.447872	-3.41843	0.000629845	0.00586471
ND1	38627.7	-1.5621	0.571613	-2.73278	0.00628018	0.037403
NDRG4	59.7424	-1.69527	0.63403	-2.6738	0.00749966	0.0430227
NEBL	42.0395	-4.93884	0.737178	-6.69965	2.08916e-11	1.23702e-09
NEGR1	1425.36	-1.44033	0.206482	-6.97556	3.04653e-12	2.21218e-10
NELL2	77.7619	-1.91365	0.542937	-3.52464	0.000424065	0.00418024
NEXN	3682.19	-1.3841	0.223329	-6.19757	5.7341e-10	2.66258e-08
NFATC2	274.384	-1.15945	0.390613	-2.96828	0.00299473	0.0210946
NGEF	21.7112	-2.66385	0.865866	-3.07652	0.00209434	0.0156854
NKD1	723.112	-1.62874	0.313804	-5.1903	2.09953e-07	5.61305e-06
NLGN3	80.1938	-1.05507	0.371279	-2.84171	0.00448717	0.0287987
NMNAT2	60.0407	-2.84185	0.68865	-4.1267	3.68004e-05	0.000527492
NOS3	48.8811	-4.49711	0.64177	-7.00736	2.42858e-12	1.80811e-10
NOSTRIN	140.204	-6.21226	0.876767	-7.08542	1.38625e-12	1.07283e-10
NOTCH4	126.092	-2.30224	0.423553	-5.43555	5.46269e-08	1.65617e-06
NOV	12175	-1.19888	0.387956	-3.09024	0.00199993	0.0151649
NOVA2	53.6276	-4.4571	0.763357	-5.83881	5.25739e-09	1.94072e-07
NPR1	1116.48	-1.02637	0.271212	-3.78439	0.000154084	0.00179697
NPR3	2463.89	-1.68748	0.205639	-8.20606	2.28574e-16	3.22655e-14
NPY1R	587.009	-2.17062	0.289833	-7.48921	6.92868e-14	6.36753e-12
NPY5R	46.7791	-2.10609	0.639665	-3.29249	0.000993057	0.00853507
NR1D2	2613.16	-1.3034	0.160912	-8.10007	5.49278e-16	7.34243e-14
NR2F1	10.6849	-3.63815	1.37998	-2.63638	0.00837967	0.0467181
NR2F1-AS1	16.3207	-3.257	1.07401	-3.03255	0.00242501	0.0177043
NR4A1	556.296	-1.88569	0.487383	-3.869	0.000109283	0.0013262
NR4A2	564.538	-1.81883	0.43465	-4.18458	2.85695e-05	0.000425049
NR5A2	25.3147	-4.56293	1.14367	-3.98973	6.61499e-05	0.000864603
NRARP	61.243	-3.19324	0.586056	-5.4487	5.07403e-08	1.54364e-06
NRBP2	184.553	-1.36567	0.25169	-5.42599	5.76354e-08	1.73842e-06
NRIP2	36.9554	-2.70056	0.686254	-3.93522	8.31197e-05	0.00105282
NRK	877.977	-1.26178	0.194731	-6.47961	9.19595e-11	4.85816e-09
NRN1	80.9331	-4.59915	0.679621	-6.76722	1.31278e-11	8.1277e-10
NRXN1	126.145	-6.26547	0.85203	-7.35359	1.92957e-13	1.6939e-11
NSG1	5.56287	-4.60489	1.4624	-3.14886	0.00163908	0.0129926
NT5DC3	1547.75	-1.41592	0.215841	-6.56001	5.3806e-11	2.98555e-09
NTRK2	777.193	-2.93121	0.312571	-9.37773	6.74068e-21	1.94982e-18
NUAK1	1969.56	-1.22299	0.193892	-6.3076	2.834e-10	1.38521e-08
NXN	198.93	-1.21449	0.284152	-4.27408	1.91928e-05	0.000303184
OAF	49.7319	-2.16952	0.506722	-4.28148	1.8565e-05	0.000294472
OAS1	174.746	-1.09075	0.416119	-2.62125	0.00876076	0.048474
OGN	13542.8	-1.84876	0.224523	-8.23414	1.80853e-16	2.57351e-14
OLFM1	139.228	-1.43221	0.40717	-3.51748	0.00043567	0.00427957
OLFML1	545.742	-1.94047	0.192925	-10.0582	8.4545e-24	3.24303e-21
OLFML2A	147.638	-5.82862	0.545854	-10.678	1.29044e-26	6.69702e-24
OLFML3	560.482	-1.63085	0.238585	-6.83548	8.17291e-12	5.40116e-10
OMD	3873.64	-1.73087	0.364493	-4.74869	2.04739e-06	4.33687e-05
OPCML	6.68029	-6.0292	1.81113	-3.32897	0.000871664	0.00769937
OR51E1	7.66424	-6.22592	1.60263	-3.8848	0.000102412	0.00125378
OSBPL3	141.723	-1.32023	0.42022	-3.14176	0.00167936	0.0132465
OSR1	873.228	-1.12197	0.326243	-3.43906	0.000583743	0.00548678
OSR2	65.2852	-1.20516	0.371485	-3.24417	0.00117791	0.00991145
OTUD1	270.635	-1.02385	0.162807	-6.28872	3.20093e-10	1.54318e-08
OVCH2	16.8347	-2.07727	0.698611	-2.97343	0.00294493	0.0208269
OXCT1	1349.57	-1.42872	0.210013	-6.80301	1.02454e-11	6.53702e-10
P2RY13	65.7134	-1.56891	0.566251	-2.77069	0.00559371	0.0343069
P2RY14	44.8171	-4.16667	0.607617	-6.85741	7.01214e-12	4.66903e-10
PAK3	676.119	-1.08439	0.174214	-6.22444	4.83264e-10	2.25587e-08
PAK7	30.5377	-3.04023	0.983966	-3.08977	0.00200311	0.0151825
PALM	63.9861	-2.12323	0.55741	-3.80911	0.00013947	0.00164392
PALMD	244.483	-5.66615	0.716188	-7.91154	2.54217e-15	3.05147e-13
PAMR1	52.6782	-3.17627	0.668343	-4.75246	2.0096e-06	4.26195e-05
PARD6G	69.4928	-1.34955	0.381045	-3.54171	0.000397548	0.00396088
PCAT19	27.6355	-4.01794	1.09998	-3.65274	0.000259458	0.00277968
PCDH1	214.93	-1.15053	0.376383	-3.0568	0.00223713	0.0165928
PCDH12	102.649	-2.20022	0.414193	-5.31207	1.08387e-07	3.09967e-06
PCDH15	37.4852	-2.51975	0.829548	-3.0375	0.00238552	0.0174735
PCDH17	125.332	-4.22853	0.7872	-5.37161	7.80382e-08	2.29116e-06
PCDH19	56.1581	-3.6922	0.627942	-5.87985	4.1064e-09	1.55155e-07
PCDH20	182.905	-1.52346	0.386402	-3.94267	8.05784e-05	0.00102765
PCDH7	11098.1	-1.03057	0.129552	-7.95487	1.79322e-15	2.22809e-13
PCLO	300.29	-1.2304	0.399835	-3.07728	0.00208901	0.0156587
PCP4L1	11.0148	-4.149	1.53186	-2.70847	0.00675937	0.0396902
PCYT2	107.568	-1.05797	0.304322	-3.47649	0.000508025	0.00486386
PDE10A	236.078	-1.02477	0.285586	-3.58829	0.000332854	0.00341268
PDGFB	47.6174	-1.92939	0.560168	-3.4443	0.000572532	0.00541099
PDLIM7	2558.96	-1.31664	0.228978	-5.75009	8.91967e-09	3.14775e-07
PECAM1	2497.6	-3.00308	0.458168	-6.55454	5.58142e-11	3.078e-09
PER3	1327.42	-1.69519	0.220456	-7.68949	1.47723e-14	1.59912e-12
PEX5L	7.69791	-6.2354	1.75933	-3.54419	0.000393826	0.00392825
PGM5	2858.41	-1.22089	0.159816	-7.63934	2.18342e-14	2.23991e-12
PGR	1931.54	-1.42847	0.197674	-7.2264	4.95972e-13	4.10865e-11
PHGDH	332.878	-1.09291	0.307984	-3.54859	0.0003873	0.00387261
PI16	127.47	-10.287	0.761576	-13.5075	1.41228e-41	3.55996e-38
PIEZO2	35.0014	-1.22295	0.366739	-3.33467	0.000854011	0.00758763
PKD2	9502.7	-1.13213	0.147309	-7.68542	1.52492e-14	1.63074e-12
PKDCC	431.369	-1.05654	0.266433	-3.9655	7.3243e-05	0.000943338
PKHD1L1	38.7255	-3.91209	0.811823	-4.8189	1.44354e-06	3.17993e-05
PLA2G2A	385.042	-7.23089	1.25954	-5.74088	9.41855e-09	3.31717e-07
PLCB1	174.845	-2.4726	0.393593	-6.28214	3.33949e-10	1.60559e-08
PLCB4	970.705	-1.48268	0.203009	-7.30351	2.80357e-13	2.42495e-11
PLCE1-AS1	6.34603	-5.96151	1.81763	-3.27983	0.0010387	0.00889481
PLCG2	131.469	-1.68213	0.38546	-4.36396	1.27727e-05	0.000212817
PLD5	271.181	-1.19155	0.268378	-4.43984	9.00254e-06	0.000158217
PLEKHA6	107.397	-3.58152	0.531037	-6.74438	1.53677e-11	9.35043e-10
PLEKHG1	126.898	-1.18508	0.269609	-4.39555	1.10495e-05	0.000188375
PLIN1	82.8717	-2.86967	0.595436	-4.81944	1.43962e-06	3.17707e-05
PLIN4	186.455	-5.50647	0.848594	-6.48893	8.64485e-11	4.59453e-09
PLN	7742.36	-1.27047	0.184418	-6.88912	5.61393e-12	3.87681e-10
PLP1	127.712	-3.95753	0.455655	-8.68538	3.77494e-18	7.57042e-16
PLVAP	378.644	-3.63558	0.487617	-7.45581	8.93193e-14	8.12391e-12
PLXDC1	68.8394	-2.64458	0.688252	-3.84245	0.00012181	0.0014552
PM20D1	14.2088	-4.09592	1.01935	-4.01816	5.86535e-05	0.000780498
PMP2	56.2781	-9.10709	1.25467	-7.25853	3.91322e-13	3.31966e-11
PNMAL1	629.339	-1.69548	0.224533	-7.55111	4.31559e-14	4.2071e-12
PNMAL2	58.3427	-1.95602	0.486934	-4.01702	5.89396e-05	0.000783083
PNPLA7	117.69	-1.23577	0.34725	-3.55874	0.000372634	0.00375507
PODN	71.5227	-2.44023	0.505454	-4.8278	1.3805e-06	3.06303e-05
PODXL	741.679	-3.11127	0.259558	-11.9868	4.16559e-33	5.25013e-30
PODXL2	42.6314	-1.65209	0.457977	-3.60736	0.000309328	0.00322202
POF1B	10.3692	-6.37518	1.64528	-3.87482	0.000106702	0.00129666
POMZP3	103.012	-1.06023	0.287523	-3.68747	0.000226491	0.0024761
PON3	6.60753	-6.01636	1.626	-3.70009	0.000215521	0.00236792
POU3F2	4.62455	-5.50578	1.91926	-2.8687	0.00412167	0.0269758
PPARG	103.618	-1.90336	0.464684	-4.09603	4.20299e-05	0.000592346
PPM1H	347.048	-1.42421	0.251261	-5.66825	1.44262e-08	4.9141e-07
PPP1R14A	2050.9	-1.02073	0.3722	-2.74242	0.00609884	0.0366695
PPP1R16B	200.199	-2.98175	0.43957	-6.78333	1.17435e-11	7.40053e-10
PPP1R1A	80.6823	-3.15578	0.928665	-3.39819	0.000678324	0.00623922
PPP1R1B	5.39823	-4.86643	1.68248	-2.89242	0.00382288	0.0255704
PPP1R9A	225.62	-1.9143	0.298577	-6.41143	1.44163e-10	7.39463e-09
PPP2R2B	390.592	-1.24969	0.245377	-5.09293	3.52569e-07	8.9512e-06
PRICKLE1	156.449	-1.48563	0.384261	-3.86619	0.000110547	0.00133878
PRIMA1	59.1204	-4.11376	0.569813	-7.21949	5.21847e-13	4.3028e-11
PRKAR2B	124.777	-1.25795	0.335199	-3.75285	0.000174833	0.00198261
PRKCDBP	511.989	-1.33445	0.320939	-4.15795	3.21122e-05	0.000468669
PRKCH	237.548	-1.76787	0.270803	-6.52826	6.65401e-11	3.59052e-09
PRKG2	19.1832	-3.10817	1.10309	-2.81769	0.00483709	0.0306245
PRND	6.31093	-5.94971	1.65333	-3.59861	0.00031992	0.00330696
PROM1	441.486	-2.26691	0.560449	-4.04481	5.23655e-05	0.000711856
PRRG3	7.48126	-5.59456	1.58303	-3.53408	0.000409196	0.00405632
PRRT2	122.907	-1.47252	0.398342	-3.69663	0.000218481	0.00239745
PRSS12	9.08517	-3.17991	0.971316	-3.27381	0.00106106	0.00904029
PRSS35	245.924	-1.47866	0.273199	-5.41238	6.21917e-08	1.86311e-06
PTGDS	116.497	-4.7168	0.607315	-7.76664	8.05939e-15	9.05784e-13
PTGER4	101.257	-1.21831	0.380763	-3.19964	0.00137598	0.011256
PTGFR	72.8266	-3.55483	0.631403	-5.63005	1.80161e-08	6.00934e-07
PTPLA	429.636	-1.29339	0.229967	-5.62425	1.86315e-08	6.1912e-07
PTPN5	10.2126	-5.74041	1.07693	-5.33033	9.8037e-08	2.8312e-06
PTPRB	755.269	-4.78003	0.449183	-10.6416	1.90825e-26	9.10027e-24
PTPRQ	95.9399	-2.49198	0.448107	-5.56112	2.68045e-08	8.67826e-07
PXDC1	1775.67	-1.06843	0.257561	-4.14824	3.35042e-05	0.000486168
PXMP2	32.6625	-1.52829	0.471262	-3.24297	0.00118292	0.00993825
PYHIN1	29.082	-2.7498	0.967611	-2.84185	0.00448532	0.0287987
RAB23	2314.08	-1.11153	0.204324	-5.44004	5.32699e-08	1.61781e-06
RAB3C	9.35149	-6.51637	1.42166	-4.58362	4.56985e-06	8.75819e-05
RAB7B	75.359	-1.09835	0.376358	-2.91837	0.00351872	0.0240092
RAB9B	312.137	-1.18135	0.219307	-5.38674	7.17471e-08	2.12412e-06
RAD54B	69.4158	-1.0397	0.380779	-2.73044	0.00632493	0.0376022
RAET1E	14.2176	-2.24934	0.847378	-2.65447	0.0079433	0.0449229
RALGPS1	38.0046	-1.42342	0.513618	-2.77137	0.0055821	0.0342595
RAMP1	411.872	-1.15796	0.327784	-3.5327	0.000411345	0.00407092
RAMP2	58.6938	-4.80887	0.532919	-9.02364	1.81948e-19	4.65286e-17
RAMP2-AS1	17.0016	-7.08418	1.16866	-6.06179	1.34617e-09	5.73746e-08
RAMP3	41.525	-8.67182	0.779491	-11.125	9.48377e-29	6.19782e-26
RAPGEF5	1002.04	-1.31737	0.212663	-6.19463	5.84235e-10	2.70573e-08
RARB	65.8179	-2.02363	0.689131	-2.93649	0.00331948	0.0229121
RARRES2	246.564	-1.21497	0.396826	-3.06171	0.00220074	0.0163372
RASD1	32.8382	-3.98094	0.935488	-4.25547	2.08609e-05	0.000323745
RASGRF1	5.08267	-5.02734	1.79368	-2.80281	0.00506588	0.0317089
RASGRP2	167.419	-1.02823	0.320241	-3.21079	0.0013237	0.0109042
RASIP1	54.754	-3.60528	0.601544	-5.99338	2.05518e-09	8.33649e-08
RASL11B	137.298	-1.49865	0.450203	-3.32884	0.000872099	0.00769937
RASSF10	7.03767	-6.11281	1.51187	-4.04322	5.27216e-05	0.000714817
RASSF3	188.223	-1.3508	0.341423	-3.95637	7.60967e-05	0.000976529
RASSF9	289.394	-1.1257	0.201093	-5.59791	2.16949e-08	7.12861e-07
RBM24	51.4319	-1.28218	0.366797	-3.49562	0.000472961	0.00458419
RBM38	142.3	-1.05307	0.331363	-3.17799	0.001483	0.011976
RBP5	17.2484	-4.57697	1.13384	-4.03672	5.42042e-05	0.00073066
RBP7	70.6967	-2.00277	0.392413	-5.10373	3.33019e-07	8.55331e-06
RBPMS2	75.5633	-2.06223	0.543711	-3.79287	0.000148917	0.00174132
RCAN2	6673.65	-1.51665	0.198146	-7.65422	1.94491e-14	2.03065e-12
RCAN3	77.1659	-1.26023	0.334322	-3.76953	0.000163557	0.00188011
REEP1	441.672	-2.15489	0.313846	-6.86608	6.59892e-12	4.47838e-10
RELN	158.59	-10.6024	1.59343	-6.65378	2.85652e-11	1.66347e-09
REM1	50.8841	-1.62204	0.471695	-3.43876	0.000584395	0.00548784
RERGL	167.37	-2.47923	0.634373	-3.90816	9.30023e-05	0.00115728
RGAG1	18.2079	-2.54821	0.803667	-3.17073	0.00152056	0.012229
RGCC	261.333	-2.3925	0.361506	-6.61815	3.63722e-11	2.08373e-09
RGS11	61.246	-1.23865	0.464241	-2.66811	0.00762797	0.0435303
RGS6	13.4974	-7.04461	1.4053	-5.01288	5.3621e-07	1.29965e-05
RGS7BP	197.255	-2.49812	0.395707	-6.31305	2.73582e-10	1.34093e-08
RHOBTB1	592.129	-1.46326	0.177136	-8.26066	1.44869e-16	2.16629e-14
RIMBP2	7.16421	-5.20523	1.5641	-3.32793	0.000874932	0.00771138
RIMS4	102.815	-1.62341	0.465267	-3.48921	0.000484456	0.0046814
RNF141	1985.86	-1.09078	0.176127	-6.19312	5.89844e-10	2.72456e-08
RNF144A	216.973	-1.08478	0.2846	-3.81158	0.000138079	0.00162971
RNF157	36.2889	-2.11047	0.678338	-3.11124	0.00186307	0.0143554
RNU11	158.758	-3.00298	0.659578	-4.55288	5.29153e-06	9.96469e-05
RNVU1-14	16.2396	-3.03266	1.05049	-2.8869	0.00389062	0.0258568
ROBO4	103.125	-3.14755	0.766614	-4.10578	4.02944e-05	0.000571999
ROR2	16.2833	-4.79967	1.03881	-4.62033	3.83128e-06	7.51144e-05
RORB	53.4266	-2.29653	0.759812	-3.0225	0.00250698	0.018234
RP11-401P9.5	27.8538	-1.86044	0.437115	-4.25617	2.07958e-05	0.000323356
RP11-695J4.2	37.2798	-1.41781	0.498094	-2.84648	0.00442059	0.028489
RP11-93I21.3	24.4983	-1.46662	0.543383	-2.69905	0.0069537	0.0405881
RP11-9G1.3	79.2824	-1.33977	0.397942	-3.36674	0.000760615	0.00689674
RP5-1071N3.1	4.4548	-4.83078	1.82555	-2.64621	0.00814	0.0457859
RPRML	3.65009	-5.15841	1.64197	-3.14159	0.00168035	0.0132483
RSPO1	19.4561	-2.65195	0.908095	-2.92034	0.00349645	0.023885
RSPO2	27.7464	-2.96338	0.877278	-3.37792	0.000730351	0.0066554
RSPO3	39.0907	-6.76311	1.02731	-6.58333	4.6004e-11	2.59342e-09
RUNDC3B	66.4823	-1.8335	0.653575	-2.80534	0.00502635	0.0315513
RXRG	12.7898	-4.7756	1.16472	-4.1002	4.12794e-05	0.0005827
RYR2	865.841	-1.41673	0.449591	-3.15115	0.00162631	0.0129038
RYR3	189.36	-1.93457	0.482065	-4.01309	5.99302e-05	0.000792705
S100B	45.1698	-2.24373	0.684623	-3.27732	0.00104798	0.00894963
SAMD4A	358.598	-1.07129	0.333653	-3.21081	0.00132363	0.0109042
SAMD5	56.6722	-1.44863	0.484243	-2.99154	0.0027757	0.0198338
SBSPON	741.609	-1.64519	0.259667	-6.33578	2.36149e-10	1.16068e-08
SCARA5	200.015	-5.36277	0.736962	-7.27686	3.41677e-13	2.92665e-11
SCARF1	30.475	-1.64829	0.407427	-4.04561	5.21875e-05	0.000710531
SCARF2	195.592	-1.19179	0.363495	-3.2787	0.00104285	0.00891529
SCD	2034.93	-1.59156	0.591786	-2.68942	0.00715773	0.0415591
SCG2	547.644	-1.65658	0.491697	-3.36911	0.000754117	0.00684838
SCN2B	12.889	-5.47239	1.16423	-4.70043	2.59608e-06	5.33891e-05
SCN3A	124.59	-1.68483	0.353959	-4.75996	1.93633e-06	4.1264e-05
SCN4B	105.063	-5.02053	0.790859	-6.3482	2.17843e-10	1.07973e-08
SCN7A	213.137	-11.0286	0.965537	-11.4223	3.23674e-30	2.59601e-27
SCN9A	130.01	-2.17059	0.350869	-6.18631	6.15884e-10	2.83741e-08
SCNN1B	6.99951	-6.09925	1.46191	-4.17212	3.01784e-05	0.000444118
SDPR	446.003	-4.98746	0.47919	-10.4081	2.27715e-25	1.03027e-22
SEC16B	141.083	-1.06313	0.254567	-4.17624	2.96366e-05	0.000438339
SELL	125.422	-1.54313	0.408638	-3.77628	0.000159191	0.00184439
SELP	88.2477	-5.58783	1.15312	-4.84582	1.26087e-06	2.81978e-05
SEMA3A	64.1235	-3.77953	0.745331	-5.07093	3.95868e-07	9.8799e-06
SEMA3B	80.952	-1.09086	0.393147	-2.77469	0.00552535	0.0339822
SEMA3C	1171.72	-1.02348	0.221272	-4.62544	3.73798e-06	7.40572e-05
SEMA3D	727.384	-1.61585	0.307315	-5.25796	1.4566e-07	4.03482e-06
SEMA3G	139.695	-5.53472	0.762036	-7.26307	3.78399e-13	3.22553e-11
SEMA5B	15.7222	-2.76826	0.908115	-3.04836	0.00230094	0.0169804
SEMA6A	110.58	-1.9228	0.498317	-3.85858	0.000114048	0.00137083
SEPP1	2647.62	-1.89788	0.41235	-4.6026	4.17252e-06	8.11733e-05
SERPINF1	534.931	-3.91904	0.495115	-7.91541	2.46434e-15	2.9783e-13
SERPINI1	353.924	-1.28157	0.283673	-4.51776	6.24985e-06	0.000115354
SERTAD4	552.681	-2.07286	0.26107	-7.93986	2.0241e-15	2.48023e-13
SFRP1	5388.64	-1.25561	0.245988	-5.10435	3.31925e-07	8.55011e-06
SFRP4	1315.64	-2.28465	0.453933	-5.03302	4.82813e-07	1.17832e-05
SFRP5	3.64414	-5.15851	1.83109	-2.81718	0.00484476	0.0306446
SGCG	85.2181	-3.14292	0.907161	-3.46456	0.000531092	0.00506
SH2D3C	55.1751	-2.30065	0.577036	-3.98702	6.69083e-05	0.000871933
SH3BGRL2	699.503	-1.39472	0.257163	-5.4235	5.84428e-08	1.75677e-06
SH3GL3	22.174	-3.96168	1.04166	-3.80322	0.000142826	0.00167675
SHANK3	44.6153	-3.51721	0.747585	-4.70476	2.54165e-06	5.23919e-05
SHC4	813.185	-1.185	0.29302	-4.04412	5.25211e-05	0.000713422
SHE	225.88	-4.32197	0.592406	-7.29562	2.97288e-13	2.55885e-11
SHROOM3	49.3713	-1.12983	0.396996	-2.84595	0.00442789	0.0285042
SIX1	23.3594	-2.07567	0.766993	-2.70624	0.00680498	0.0398651
SLC10A4	89.6464	-2.66823	0.482767	-5.52694	3.25862e-08	1.03788e-06
SLC1A7	14.2706	-6.23713	1.3313	-4.68499	2.79969e-06	5.67823e-05
SLC24A4	455.846	-2.62085	0.346745	-7.55844	4.07934e-14	3.99889e-12
SLC26A10	55.2934	-1.69289	0.480903	-3.52023	0.000431173	0.00424083
SLC26A2	1452.49	-1.01147	0.203954	-4.9593	7.0749e-07	1.66671e-05
SLC26A4	539.371	-2.99222	0.448333	-6.67411	2.48743e-11	1.46302e-09
SLC26A4-AS1	93.2642	-3.99053	0.62668	-6.36773	1.91841e-10	9.56222e-09
SLC26A5	8.89282	-5.54222	1.5263	-3.63115	0.000282158	0.00298303
SLC2A4	46.3442	-3.80059	1.31851	-2.8825	0.00394538	0.026142
SLC38A11	9.64631	-3.55971	1.32732	-2.68189	0.00732078	0.0422556
SLC4A3	83.3764	-1.23784	0.448506	-2.75992	0.00578153	0.0351435
SLC52A3	3.99191	-5.29095	1.77864	-2.97471	0.00293261	0.0207565
SLC5A4	8.001	-6.291	1.64271	-3.82965	0.000128324	0.00152785
SLC8A1	1008.94	-1.92068	0.377722	-5.08491	3.67805e-07	9.27131e-06
SLCO2A1	96.4995	-7.52237	0.956286	-7.86623	3.65497e-15	4.32832e-13
SLCO4C1	21.6852	-2.93115	1.11939	-2.61852	0.00883123	0.048767
SLFN12L	34.8247	-1.86812	0.678984	-2.75135	0.00593503	0.0358765
SLIT2	290.282	-1.39899	0.21967	-6.36861	1.90754e-10	9.53501e-09
SLIT3	2437.42	-1.04954	0.182011	-5.76633	8.10185e-09	2.89387e-07
SLITRK1	27.0469	-3.8938	1.0983	-3.54529	0.000392183	0.0039185
SLITRK5	37.1333	-1.74314	0.650811	-2.67841	0.00739726	0.0425994
SLITRK6	6.04733	-5.88946	1.83673	-3.20649	0.00134363	0.0110426
SMPD3	6.77307	-5.75674	1.58385	-3.63464	0.000278368	0.00295358
SMPX	21.3083	-3.10065	0.924187	-3.35501	0.00079363	0.00716981
SNORA53	37.3384	-1.38359	0.517374	-2.67425	0.0074897	0.0429915
SNORD3A	79.0317	-3.19814	0.499764	-6.39929	1.56099e-10	7.93763e-09
SORBS2	5620.18	-1.25155	0.211483	-5.91796	3.25967e-09	1.25858e-07
SORCS1	42.1271	-7.49493	0.980331	-7.64531	2.08445e-14	2.16354e-12
SORL1	1323.2	-1.0103	0.204259	-4.94615	7.56951e-07	1.77141e-05
SOST	533.862	-1.46717	0.53255	-2.75499	0.00586931	0.035589
SOX10	23.0706	-7.82058	1.02317	-7.64351	2.11384e-14	2.18121e-12
SOX17	22.1217	-2.80184	0.864112	-3.24245	0.00118507	0.00993969
SOX18	17.2881	-5.20349	1.0217	-5.09297	3.52501e-07	8.9512e-06
SOX6	52.1102	-1.59555	0.387841	-4.11393	3.88978e-05	0.000555301
SOX7	68.8725	-2.81343	0.747728	-3.76263	0.000168134	0.0019252
SPHKAP	143.734	-4.24532	0.913884	-4.64537	3.39472e-06	6.76835e-05
SPON1	198.354	-1.61719	0.445544	-3.62969	0.000283762	0.0029964
SPTBN1	381.35	-1.09602	0.217362	-5.04236	4.59834e-07	1.13005e-05
SRGAP3	42.7768	-1.37544	0.440981	-3.11904	0.00181439	0.0140787
SRPK3	40.3771	-2.7333	0.752075	-3.63435	0.000278682	0.00295513
SSC5D	162.035	-2.40704	0.632069	-3.80819	0.000139987	0.00164781
SSUH2	6.83011	-5.76165	1.71502	-3.35952	0.000780781	0.00707232
ST6GAL2	3575.1	-2.34512	0.277557	-8.44916	2.93411e-17	4.88419e-15
ST6GALNAC1	8.91048	-5.85842	1.35467	-4.32462	1.52793e-05	0.000248025
ST6GALNAC2	19.9942	-2.28858	0.706957	-3.23722	0.001207	0.0100602
ST6GALNAC5	94.306	-1.37059	0.365675	-3.74811	0.000178169	0.00201285
ST8SIA6	19.1065	-5.43566	1.09976	-4.9426	7.70863e-07	1.80157e-05
STAB2	37.968	-8.53945	1.35693	-6.29322	3.10952e-10	1.50322e-08
STON2	285.117	-3.09826	0.432644	-7.16121	7.99664e-13	6.38465e-11
STOX2	255.444	-1.15866	0.340879	-3.39905	0.000676204	0.00623289
SUCNR1	28.2899	-3.2374	0.695658	-4.65373	3.25984e-06	6.52153e-05
SULT1C2	5.31307	-5.70082	1.71792	-3.31845	0.000905196	0.00791486
SULT1C4	71.3369	-1.34927	0.405345	-3.32869	0.000872569	0.00769937
SV2B	39.3801	-2.50055	0.936387	-2.67042	0.0075756	0.0433436
SVEP1	2141.51	-1.49578	0.266679	-5.6089	2.03617e-08	6.71554e-07
SYNC	1115.33	-1.47124	0.183632	-8.0119	1.12953e-15	1.47634e-13
SYT15	29.2308	-4.86259	0.655141	-7.42221	1.15179e-13	1.02643e-11
SYT17	31.0634	-2.18791	0.727935	-3.00564	0.00265019	0.019079
TACC2	25.4348	-1.84216	0.634205	-2.90468	0.00367631	0.0247918
TAGAP	77.8197	-1.38879	0.472283	-2.9406	0.00327579	0.022685
TBC1D4	323.113	-1.38588	0.285698	-4.85088	1.22918e-06	2.76291e-05
TBX5-AS1	8.12254	-5.05146	1.61202	-3.13362	0.00172664	0.0135648
TCEANC	67.0768	-1.1373	0.314758	-3.61326	0.000302366	0.00315695
TCF15	4.23812	-5.0816	1.83552	-2.76848	0.00563187	0.0344811
TEK	162.012	-3.10552	0.375631	-8.26747	1.36828e-16	2.06354e-14
TENM1	73.5919	-1.0976	0.379472	-2.89244	0.00382257	0.0255704
TF	37.8365	-4.56862	1.21144	-3.77124	0.000162441	0.00187216
TGFB2	1084.22	-1.53955	0.30558	-5.03813	4.70095e-07	1.15046e-05
THBS4	117.553	-4.27356	0.82726	-5.16592	2.39263e-07	6.32941e-06
THRB	6197.93	-1.83664	0.144157	-12.7406	3.51786e-37	5.64297e-34
THSD1	71.7275	-2.7293	0.581328	-4.69494	2.66687e-06	5.45271e-05
THSD7A	113.946	-3.52366	0.516465	-6.82266	8.93712e-12	5.81902e-10
THSD7B	365.189	-1.20077	0.285346	-4.20812	2.57503e-05	0.000389343
THY1	233.981	-1.43291	0.430479	-3.32864	0.000872697	0.00769937
TIE1	103.453	-3.92327	0.761255	-5.15369	2.55405e-07	6.69631e-06
TIMP3	10806.5	-2.24536	0.420348	-5.34166	9.20988e-08	2.67283e-06
TINAGL1	2016.39	-1.52954	0.259426	-5.89585	3.72753e-09	1.42364e-07
TLL1	77.0117	-1.95706	0.614665	-3.18394	0.00145284	0.0117574
TM4SF18	89.0354	-3.35387	0.842451	-3.98109	6.86004e-05	0.00089135
TMCC3	106.316	-1.24869	0.424929	-2.93858	0.00329724	0.0228067
TMEM100	40.1925	-2.38536	0.79161	-3.0133	0.00258426	0.0186806
TMEM119	46.3136	-3.77518	0.607208	-6.21728	5.05834e-10	2.355e-08
TMEM150C	34.1494	-3.41961	0.808351	-4.23035	2.33325e-05	0.000356451
TMEM175	74.1309	-1.13184	0.3197	-3.54033	0.000399631	0.00397716
TMEM176A	56.8807	-1.60056	0.448316	-3.57016	0.00035676	0.003622
TMEM255A	31.8466	-3.14736	0.778449	-4.04312	5.27454e-05	0.000714817
TMEM30B	808.383	-1.22255	0.38733	-3.15635	0.00159758	0.0127329
TMEM47	7612.12	-1.39576	0.234956	-5.9405	2.84158e-09	1.11422e-07
TMEM88	13.0083	-3.53123	0.983537	-3.59034	0.000330247	0.00338988
TMOD2	716.382	-1.61349	0.242169	-6.66268	2.68881e-11	1.57099e-09
TNFRSF19	33.741	-2.77466	0.830381	-3.34143	0.000833472	0.00744261
TNFSF10	425.431	-1.80316	0.492583	-3.66063	0.000251596	0.0027086
TNNT2	3.88977	-5.25403	1.38998	-3.77993	0.000156875	0.0018271
TNXB	1087.99	-1.53528	0.226542	-6.77701	1.22686e-11	7.64948e-10
TPH1	1792.6	-2.17503	0.254453	-8.54788	1.25371e-17	2.21218e-15
TPM1	11313.8	-1.53194	0.319935	-4.78829	1.68205e-06	3.63277e-05
TPO	8.69541	-6.40891	1.57696	-4.06409	4.82195e-05	0.000665754
TPPP3	107.86	-1.45638	0.554155	-2.62811	0.00858601	0.0476715
TRAC	45.6287	-1.72175	0.495309	-3.47611	0.000508741	0.00486775
TRBC2	27.9425	-1.77197	0.676432	-2.61958	0.0088039	0.0486795
TRIL	26.9222	-3.8281	1.00689	-3.80189	0.000143597	0.00168357
TRIM29	27.0963	-3.58731	0.982351	-3.65176	0.000260445	0.00278687
TRIM36	354.584	-1.2849	0.313993	-4.09215	4.27399e-05	0.00059948
TRIM45	66.5085	-1.19629	0.416263	-2.87387	0.00405475	0.0266366
TRNL1	33.7084	-1.77675	0.659722	-2.69318	0.00707742	0.0412013
TRNM	170.12	-1.43424	0.505426	-2.83769	0.00454414	0.0290723
TRPC6	65.3138	-2.12057	0.521988	-4.06249	4.85525e-05	0.00066826
TRPM3	61.4652	-1.32487	0.454706	-2.91369	0.00357189	0.0242567
TRPM6	25.646	-3.5964	1.02697	-3.50195	0.000461868	0.00450258
TSHZ2	10.7909	-4.11888	1.23573	-3.33315	0.00085868	0.0076176
TSPAN11	25.6819	-4.2467	0.90207	-4.70773	2.50488e-06	5.18155e-05
TSPAN12	201.94	-1.58272	0.279746	-5.6577	1.53419e-08	5.19592e-07
TSPAN13	29.3411	-2.6687	0.714704	-3.73399	0.000188467	0.00211411
TSPAN18	146.651	-4.02407	0.78911	-5.0995	3.40551e-07	8.72137e-06
TSPAN2	1574.17	-1.29826	0.24857	-5.22289	1.76153e-07	4.7875e-06
TSPAN33	55.9276	-1.13164	0.416939	-2.71415	0.00664462	0.0391262
TSPAN8	95.9012	-2.25089	0.537367	-4.18874	2.80508e-05	0.000419143
TTLL11	409.558	-1.08947	0.228641	-4.76499	1.88861e-06	4.02958e-05
TTN	532.939	-2.72111	0.315972	-8.61188	7.18731e-18	1.37848e-15
TUSC3	23.8071	-3.53366	1.15114	-3.0697	0.00214273	0.0159732
TUSC5	66.466	-3.30707	1.05717	-3.12823	0.00175862	0.0137609
UBD	6.62163	-4.70518	1.76644	-2.66365	0.00772977	0.0440542
UBE2QL1	256.583	-1.09751	0.313873	-3.49667	0.00047111	0.00457246
UCHL1	623.828	-1.06581	0.23355	-4.56351	5.03061e-06	9.53439e-05
UNC79	5.41455	-5.42635	1.61587	-3.35817	0.00078461	0.00710336
USHBP1	10.8593	-6.14222	1.09291	-5.62007	1.90881e-08	6.331e-07
USP27X-AS1	28.7371	-2.06693	0.600877	-3.43986	0.000582016	0.00548594
VANGL2	17.7077	-3.26615	1.00122	-3.26217	0.00110563	0.00937021
VAT1L	1120.24	-1.39297	0.425065	-3.27707	0.0010489	0.00894963
VGLL3	1807.23	-1.03909	0.276918	-3.75234	0.00017519	0.00198537
VIT	62.2055	-6.30706	1.32602	-4.75638	1.97097e-06	4.19515e-05
VWA1	66.2607	-2.00826	0.393978	-5.0974	3.44356e-07	8.80604e-06
VWF	1937.11	-6.40856	0.749686	-8.54832	1.24891e-17	2.21218e-15
WDR17	137.932	-1.18383	0.292608	-4.04577	5.21516e-05	0.000710531
WFS1	1099.68	-1.1451	0.235824	-4.85576	1.19923e-06	2.69904e-05
WIPF3	61.1243	-1.11116	0.371642	-2.98987	0.00279098	0.0199138
WNK2	10.805	-3.06158	0.864578	-3.54112	0.00039843	0.00396744
WNT11	14.9845	-3.47613	1.18069	-2.94414	0.00323852	0.0224445
WNT5A	66.6656	-2.22314	0.644599	-3.44887	0.000562947	0.00533469
WRB	232.593	-1.0064	0.239718	-4.19826	2.68974e-05	0.000403232
WSCD2	238.514	-2.77756	0.612789	-4.53266	5.8246e-06	0.000108987
WTIP	187.705	-1.31923	0.294795	-4.4751	7.63773e-06	0.000137696
XAF1	600.504	-1.15367	0.422853	-2.7283	0.00636613	0.0377962
XG	389.486	-1.09614	0.251589	-4.35688	1.31928e-05	0.00021858
XK	69.5031	-1.54229	0.388267	-3.97223	7.12024e-05	0.000919742
ZBTB46	113.255	-1.06512	0.32637	-3.26353	0.00110032	0.00932974
ZCCHC5	47.2898	-2.78142	0.66622	-4.17493	2.98081e-05	0.000440137
ZNF366	34.2432	-5.01064	1.39759	-3.58521	0.000336805	0.00344917
ZNF385B	41.6617	-3.66099	0.813496	-4.50032	6.78526e-06	0.00012394
ZNF521	207.553	-2.01322	0.438928	-4.58667	4.50377e-06	8.66619e-05
ZNF547	42.9047	-1.44554	0.450091	-3.21166	0.0013197	0.0108864
ZSCAN31	154.971	-1.24946	0.259077	-4.82272	1.41612e-06	3.13519e-05
