# Supplementary material for: Integrated bulk and scRNA sequence identified anoikis-related diagnostic biomarkers and potential association with immune infiltration in type A aortic dissection
Source: Aging (Albany NY). 2023 Oct 24;15(20):11268–85. doi: 10.18632/aging.205126 (PMC10637813; doi:10.18632/aging.205126)
Supplement: Supplementary Table 4 [file aging-15-205126-s004.xlsx]

## Sheet: TableS4
Supplementary Table Table 4. Results of GO and KEGG enrichment analysis of up-regulated DEGs.
source	term_name	term_id	highlighted	adjusted_p_value	negative_log10_of_adjusted_p_value	term_size	query_size	intersection_size	effective_domain_size	intersections
GO:MF	signaling receptor binding	GO:0005102	TRUE	5.24e-08	7.28076	1556	336	62	20171	ABCA1,ANGPTL2,APLN,ARNTL,ARRDC3,BMP2,CCL2,CCL20,CCL7,CXCL1,CXCL3,CXCL5,CXCL6,ERN1,ESM1,FGR,FPR1,GNAI2,HGF,HILPDA,HSPA8,ICAM1,IL1R1,IL1RAP,IL33,IL6,IL8,ITGA2,ITGA5,ITGAX,ITGB3,JAK3,LAMB1,LAMC2,LIF,MARCO,MMP14,MSMP,NAMPT,NETO2,OSMR,P2RY2,PDGFA,PDGFRA,PGF,PLAUR,PLSCR1,PTPN2,RND1,S100A9,SH2B2,SHC1,SLA,SPP1,TIMP1,TLR2,TNFSF8,TRAF1,TRAF3IP2,TSLP,TUBB3,VEGFA
GO:MF	cytokine receptor binding	GO:0005126	FALSE	1.5e-07	6.82503	276	336	23	20171	CCL2,CCL20,CCL7,CXCL1,CXCL3,CXCL5,CXCL6,IL1RAP,IL33,IL6,IL8,ITGA5,ITGB3,JAK3,LIF,MSMP,OSMR,PGF,SHC1,TNFSF8,TRAF1,TSLP,VEGFA
GO:MF	platelet-derived growth factor receptor binding	GO:0005161	FALSE	5.7e-07	6.2438	14	336	7	20171	ERN1,IL1R1,ITGA5,ITGB3,PDGFA,PDGFRA,VEGFA
GO:MF	protein binding	GO:0005515	FALSE	2.5411e-06	5.59498	14778	336	290	20171	ABCA1,ACVR1B,ADAM8,ADAMTS3,ADH4,AKR1C1,ALKBH2,ALOX5AP,ANGPTL2,APCDD1L,APLN,AQP9,ARMC9,ARNTL,ARNTL2,ARPC5L,ARRDC3,ASS1,ATP1A1,B4GALT1,BAZ1A,BCAT1,BCL2A1,BCL3,BCL6,BEND3,BEST1,BHLHE40,BIRC3,BMP2,C15ORF48,C1GALT1,C1QTNF1,CA13,CAPG,CARD6,CASP4,CCL2,CCL20,CCL7,CCR1,CD163,CD68,CD82,CDC37L1,CDC42EP4,CDCP1,CDK18,CDK2,CDKN1A,CEBPB,CEBPD,CFB,CHEK2,CHST1,CKS2,CLMP,CNTNAP1,CSTF2T,CTSL,CXCL1,CXCL3,CXCL5,CXCL6…
GO:MF	cytokine activity	GO:0005125	FALSE	1.03772e-05	4.98392	237	336	19	20171	BMP2,CCL2,CCL20,CCL7,CXCL1,CXCL3,CXCL5,CXCL6,IL33,IL6,IL8,LIF,MSMP,NAMPT,SPP1,TIMP1,TNFSF8,TSLP,VEGFA
GO:MF	interleukin-1 receptor activity	GO:0004908	TRUE	1.39791e-05	4.85452	7	336	5	20171	IL1R1,IL1R2,IL1RAP,IL1RL1,IL1RL2
GO:MF	protein-containing complex binding	GO:0044877	TRUE	4.12989e-05	4.38406	1304	336	49	20171	ACVR1B,ALOX5AP,ARPC5L,BIRC3,C1QTNF1,CAPG,CDKN1A,CTSL,ERMN,ESM1,FCGR3A,FGR,GCH1,GNAI2,HGF,HMGA2,HSPA5,HSPA8,ICAM1,ITGA2,ITGA5,ITGAX,ITGB3,LAMB1,LDLR,LRP8,MAFB,MLKL,MMP14,MSR1,MYC,MYOM3,NEAT1,NME1,NOD2,PDGFA,PDGFRA,PGF,PIK3R5,PIM1,PKNOX2,PTPN2,PTX3,SHC1,SNRPD1,SPP1,STX1A,TLR2,YBX3
GO:MF	growth factor receptor binding	GO:0070851	FALSE	5.71562e-05	4.24294	141	336	14	20171	ERN1,ESM1,IL1R1,IL1RAP,IL6,ITGA5,ITGB3,PDGFA,PDGFRA,PGF,PLSCR1,SHC1,TSLP,VEGFA
GO:MF	immune receptor activity	GO:0140375	FALSE	0.000419067	3.37772	142	336	13	20171	C5AR1,CCR1,FCGR3A,FPR1,IL15RA,IL1R1,IL1R2,IL1RAP,IL1RL1,IL1RL2,IL4R,LILRA6,OSMR
GO:MF	chemokine activity	GO:0008009	FALSE	0.000874895	3.05804	50	336	8	20171	CCL2,CCL20,CCL7,CXCL1,CXCL3,CXCL5,CXCL6,IL8
GO:MF	chemokine receptor binding	GO:0042379	FALSE	0.00164956	2.78263	72	336	9	20171	CCL2,CCL20,CCL7,CXCL1,CXCL3,CXCL5,CXCL6,IL8,MSMP
GO:MF	NAD+ nucleosidase activity	GO:0003953	FALSE	0.00256937	2.59017	16	336	5	20171	IL1R1,IL1RAP,IL1RL1,IL1RL2,TLR2
GO:MF	NAD(P)+ nucleosidase activity	GO:0050135	TRUE	0.00256937	2.59017	16	336	5	20171	IL1R1,IL1RAP,IL1RL1,IL1RL2,TLR2
GO:MF	NAD+ nucleotidase, cyclic ADP-ribose generating	GO:0061809	TRUE	0.00256937	2.59017	16	336	5	20171	IL1R1,IL1RAP,IL1RL1,IL1RL2,TLR2
GO:MF	enzyme binding	GO:0019899	FALSE	0.00464573	2.33295	2082	336	61	20171	ABCA1,ACVR1B,ALOX5AP,BCL3,CDC42EP4,CDKN1A,CEBPB,CHEK2,CKS2,DIO2,ERN1,ERRFI1,FAM20C,FGR,GCH1,HIF1A,HMOX1,HSPA5,HSPA8,IL15RA,IL1R1,ITGAX,ITGB3,JAK3,LAPTM5,LDLR,LMNB1,MIDN,MLKL,MVP,NDRG1,NEK6,NFKBIA,NKX3-1,NOD2,PHYHIP,PLAUR,PLSCR1,PPP1R18,PTPN2,PUS7,RELB,RFC2,RFFL,RND1,RND3,SERPINA1,SH2B2,SHC1,SIGLEC10,SLC2A1,SLC9A1,SOD2,SPRED3,STX1A,TIMP1,TNFAIP3,TNIP2,TRAF1,UBASH3B,YBX3
GO:MF	neutral L-amino acid transmembrane transporter activity	GO:0015175	TRUE	0.00483895	2.31525	45	336	7	20171	SLC1A3,SLC38A5,SLC43A2,SLC6A6,SLC6A9,SLC7A11,SLC7A5
GO:MF	CXCR chemokine receptor binding	GO:0045236	FALSE	0.00490354	2.30949	18	336	5	20171	CXCL1,CXCL3,CXCL5,CXCL6,IL8
GO:MF	receptor ligand activity	GO:0048018	FALSE	0.00676393	2.1698	500	336	23	20171	APLN,BMP2,CCL2,CCL20,CCL7,CXCL1,CXCL3,CXCL5,CXCL6,HGF,IL33,IL6,IL8,LIF,MSMP,NAMPT,PDGFA,PGF,SPP1,TIMP1,TNFSF8,TSLP,VEGFA
GO:MF	signaling receptor activator activity	GO:0030546	FALSE	0.00870844	2.06006	508	336	23	20171	APLN,BMP2,CCL2,CCL20,CCL7,CXCL1,CXCL3,CXCL5,CXCL6,HGF,IL33,IL6,IL8,LIF,MSMP,NAMPT,PDGFA,PGF,SPP1,TIMP1,TNFSF8,TSLP,VEGFA
GO:MF	very-low-density lipoprotein particle receptor activity	GO:0030229	TRUE	0.00994466	2.00241	4	336	3	20171	APOBR,LDLR,LRP8
GO:MF	bile acid binding	GO:0032052	TRUE	0.0125025	1.903	11	336	4	20171	AKR1C1,AKR1C3,PYGL,VDR
GO:MF	G protein-coupled receptor binding	GO:0001664	FALSE	0.0172855	1.76232	290	336	16	20171	APLN,ARRDC3,CCL2,CCL20,CCL7,CXCL1,CXCL3,CXCL5,CXCL6,FPR1,GNAI2,HSPA8,IL8,MARCO,MSMP,P2RY2
GO:MF	virus receptor activity	GO:0001618	TRUE	0.0232175	1.63418	77	336	8	20171	ANPEP,CLEC5A,ICAM1,ITGA2,ITGA5,ITGB3,LDLR,PLSCR1
GO:MF	cytokine receptor activity	GO:0004896	FALSE	0.0245173	1.61053	100	336	9	20171	CCR1,IL15RA,IL1R1,IL1R2,IL1RAP,IL1RL1,IL1RL2,IL4R,OSMR
GO:MF	signaling receptor regulator activity	GO:0030545	FALSE	0.0245857	1.60932	543	336	23	20171	APLN,BMP2,CCL2,CCL20,CCL7,CXCL1,CXCL3,CXCL5,CXCL6,HGF,IL33,IL6,IL8,LIF,MSMP,NAMPT,PDGFA,PGF,SPP1,TIMP1,TNFSF8,TSLP,VEGFA
GO:MF	exogenous protein binding	GO:0140272	FALSE	0.0255009	1.59344	78	336	8	20171	ANPEP,CLEC5A,ICAM1,ITGA2,ITGA5,ITGB3,LDLR,PLSCR1
GO:MF	transition metal ion binding	GO:0046914	TRUE	0.0289244	1.53874	1115	336	37	20171	ADAM8,ADAMTS3,ADH4,ALKBH2,ANPEP,B4GALT1,CA12,CA13,FAM20C,FTH1,GCH1,IKZF4,MMP1,MMP14,MMP19,MMP3,MT1E,MT1G,MT1M,MT1X,MT2A,PHC2,PIM1,PLOD2,PLSCR1,POLR2L,RNF24,S100A9,SHMT2,SNCG,SOD2,TET3,TIMP1,TNFAIP3,TRAF1,TRIM9,VDR
GO:MF	kinase binding	GO:0019900	TRUE	0.033143	1.47961	788	336	29	20171	CDKN1A,CEBPB,CHEK2,CKS2,ERRFI1,FGR,GCH1,HIF1A,IL15RA,ITGAX,ITGB3,MIDN,MLKL,MVP,NEK6,NOD2,PHYHIP,PTPN2,RELB,RFFL,RND1,RND3,SH2B2,SHC1,SLC2A1,SPRED3,STX1A,TNFAIP3,TNIP2
GO:MF	vascular endothelial growth factor receptor binding	GO:0005172	FALSE	0.0364515	1.43828	14	336	4	20171	ITGA5,ITGB3,PGF,VEGFA
GO:MF	amino acid transmembrane transporter activity	GO:0015171	FALSE	0.0365939	1.43659	82	336	8	20171	SLC16A10,SLC1A3,SLC38A5,SLC43A2,SLC6A6,SLC6A9,SLC7A11,SLC7A5
GO:MF	growth factor binding	GO:0019838	FALSE	0.0409504	1.38774	132	336	10	20171	ACVR1B,IGFBP3,IGFBP5,IL1R1,IL1R2,ITGB3,OSMR,PDGFA,PDGFRA,SHC1
GO:MF	L-amino acid transmembrane transporter activity	GO:0015179	FALSE	0.0456537	1.34052	63	336	7	20171	SLC16A10,SLC1A3,SLC38A5,SLC43A2,SLC6A9,SLC7A11,SLC7A5
GO:MF	cargo receptor activity	GO:0038024	TRUE	0.0473225	1.32493	85	336	8	20171	ABCA1,APOBR,CD163,LDLR,LRP8,MARCO,MSR1,OLR1
GO:BP	inflammatory response	GO:0006954	TRUE	2.64e-31	30.5788	793	340	73	21128	ADAM8,ADORA3,ALOX5AP,ASS1,B4GALT1,BCL6,BIRC3,BMP2,C2CD4A,C5AR1,CASP4,CCL2,CCL20,CCL7,CCR1,CD163,CD68,CEBPB,CHST1,CXCL1,CXCL3,CXCL5,CXCL6,FCGR3A,FGR,FPR1,HGF,HIF1A,HMOX1,IER3,IL1R1,IL1R2,IL1RAP,IL1RL1,IL1RL2,IL33,IL4R,IL6,IL8,IRAK2,ITGA2,KDM6B,LDLR,LPCAT3,MAPK13,MMP3,MSMP,NEAT1,NFKBIA,NLRP6,NOD2,OLR1,ORM2,OSMR,PLSCR1,PTPN2,PTX3,RELB,S100A9,SBNO2,SERPINA1,SERPINA3,SIGLEC10,SLAMF8,SLC11A1,SPP1,TIMP1…
GO:BP	response to stress	GO:0006950	FALSE	3.18e-28	27.4969	3980	340	158	21128	ABCA1,ADAM8,ADORA3,AKR1C3,ALKBH2,ALOX5AP,AQP9,ARNTL,ASS1,B4GALT1,BCL2A1,BCL3,BCL6,BIRC3,BMP2,C1QTNF1,C1RL,C2CD4A,C5AR1,CASP4,CCL2,CCL20,CCL7,CCR1,CD163,CD68,CDC42EP4,CDK2,CDKN1A,CEBPB,CEBPD,CFB,CHEK2,CHST1,CLEC5A,CXCL1,CXCL3,CXCL5,CXCL6,DDIT4,DIO2,DNAJB9,ERN1,ERRFI1,FCGR3A,FGR,FOSL1,FPR1,GADD45B,GCH1,HGF,HIF1A,HILPDA,HIPK2,HK2,HMGA2,HMOX1,HSPA5,HSPA8,IER3,IFITM3,IL1R1,IL1R2,IL1RAP,IL1RL1,IL1RL2,I…
GO:BP	cellular response to chemical stimulus	GO:0070887	TRUE	6e-26	25.2217	2697	340	124	21128	ABCA1,ABCC3,ADAM8,ADH4,AKR1C1,AKR1C3,ALOX5AP,AQP9,ARNTL,ASS1,ATP1A1,BIRC3,BMP2,C5AR1,CASP4,CCL2,CCL20,CCL7,CCR1,CD68,CDC42EP4,CDK2,CEBPB,CHEK2,CTSL,CXCL1,CXCL3,CXCL5,CXCL6,DDIT4,DNAJB9,ERN1,ERRFI1,GCH1,GNAI2,HGF,HIF1A,HILPDA,HIPK2,HK2,HMOX1,HRH2,HSPA5,HSPA8,ICAM1,IFITM3,IGFBP5,IL15RA,IL1R1,IL1R2,IL1RAP,IL1RL1,IL1RL2,IL33,IL4R,IL6,IL8,IRAK2,ITGA2,ITGB3,ITPKC,JAK3,KCNK3,KDM6B,LAPTM5,LDLR,LILRA6,LRP…
GO:BP	defense response	GO:0006952	FALSE	1.29e-21	20.8895	1791	340	93	21128	ADAM8,ADORA3,ALOX5AP,ASS1,B4GALT1,BCL3,BCL6,BIRC3,BMP2,C1RL,C2CD4A,C5AR1,CASP4,CCL2,CCL20,CCL7,CCR1,CD163,CD68,CDC42EP4,CEBPB,CFB,CHST1,CLEC5A,CXCL1,CXCL3,CXCL5,CXCL6,DDIT4,FCGR3A,FGR,FOSL1,FPR1,GCH1,HGF,HIF1A,HMOX1,IER3,IFITM3,IL1R1,IL1R2,IL1RAP,IL1RL1,IL1RL2,IL33,IL4R,IL6,IL8,IRAK2,ITGA2,ITGAX,JAK3,KDM6B,LAPTM5,LDLR,LPCAT3,LRP8,MAPK13,MARCO,MLKL,MMP3,MSMP,NEAT1,NFKBIA,NLRP6,NOD2,OLR1,ORM2,OSMR,…
GO:BP	response to stimulus	GO:0050896	FALSE	3.81e-21	20.4191	9039	340	238	21128	ABCA1,ABCC3,ACVR1B,ADAM8,ADAMTS3,ADH4,ADORA3,AKR1C1,AKR1C3,ALKBH2,ALOX5AP,ANPEP,APCDD1L,APLN,AQP9,ARMC9,ARNTL,ARNTL2,ARRDC3,ASS1,ATP1A1,B4GALT1,BCL2A1,BCL3,BCL6,BEST1,BHLHE40,BIRC3,BMP2,C15ORF48,C1QTNF1,C1RL,C2CD4A,C5AR1,CASP4,CCL2,CCL20,CCL7,CCR1,CD163,CD68,CDC42EP4,CDK2,CDKN1A,CEBPB,CEBPD,CFB,CHEK2,CHST1,CHSY1,CLEC5A,CNTNAP1,CTSL,CXCL1,CXCL3,CXCL5,CXCL6,DDIT4,DIO2,DNAJB9,EIF4EBP1,ERN1,ERRFI1,ES…
GO:BP	positive regulation of biological process	GO:0048518	FALSE	4.84e-21	20.315	6348	340	192	21128	ABCA1,ACVR1B,ADAM8,ADAMTS3,AKR1C1,AKR1C3,ALOX5AP,APLN,ARMC9,ARNTL,ARNTL2,ARRDC3,ASS1,ATP1A1,B4GALT1,BAZ1A,BCL3,BCL6,BEND3,BIRC3,BMP2,C1QTNF1,C1RL,C2CD4A,C5AR1,CASP4,CCDC71L,CCL2,CCL20,CCL7,CCR1,CDC42EP4,CDK2,CDKN1A,CEBPB,CEBPD,CFB,CHEK2,CHSY1,CKS2,CLEC5A,CXCL5,DDIT4,DIO2,DNAJB9,E2F3,EIF4EBP1,ELL2,ERN1,ESM1,ETS2,FAM20C,FCGR3A,FGR,FOSL1,FOSL2,FPR1,GADD45B,GCH1,GLIS3,GLRX,GNAI2,HGF,HIF1A,HILPDA,HIPK…
GO:BP	response to external stimulus	GO:0009605	FALSE	1.07e-20	19.9699	2861	340	119	21128	ABCA1,ADAM8,AKR1C3,ALOX5AP,ARNTL2,ASS1,BCL3,BCL6,BEST1,BHLHE40,BIRC3,BMP2,C15ORF48,C1QTNF1,C1RL,C2CD4A,C5AR1,CASP4,CCL2,CCL20,CCL7,CCR1,CD68,CDC42EP4,CDKN1A,CEBPB,CFB,CHSY1,CLEC5A,CXCL1,CXCL3,CXCL5,CXCL6,DDIT4,DIO2,FCGR3A,FGR,FKBP5,FOSL1,FPR1,GCH1,GNAI2,HGF,HIF1A,HMGA2,HMOX1,HSPA5,HSPA8,IER3,IFITM3,IL1R1,IL1RAP,IL1RL1,IL1RL2,IL33,IL4R,IL6,IL8,IRAK2,ITGA2,ITGAX,ITGB3,JAK3,LAMC2,LDLR,LPCAT3,LRP8,MA…
GO:BP	response to organic substance	GO:0010033	FALSE	1.44e-20	19.8415	2664	340	114	21128	ABCA1,ADH4,AKR1C1,AKR1C3,AQP9,ARNTL,ASS1,ATP1A1,BIRC3,BMP2,C5AR1,CASP4,CCL2,CCL20,CCL7,CCR1,CD68,CDC42EP4,CEBPB,CHEK2,CTSL,CXCL1,CXCL3,CXCL5,CXCL6,DDIT4,DIO2,DNAJB9,ERN1,ERRFI1,FOSL1,GCH1,GNAI2,HIF1A,HK2,HMOX1,HRH2,HSPA5,HSPA8,ICAM1,IFITM3,IGFBP5,IL15RA,IL1R1,IL1R2,IL1RAP,IL1RL1,IL1RL2,IL33,IL4R,IL6,IL8,IRAK2,ITGA2,ITGB3,JAK3,LAPTM5,LDLR,LILRA6,LRP8,MAPK13,MMP14,MMP19,MMP3,MSR1,MT1X,MT2A,NFIL3,NF…
GO:BP	response to chemical	GO:0042221	FALSE	2.38e-18	17.6233	4088	340	142	21128	ABCA1,ABCC3,ADAM8,ADH4,AKR1C1,AKR1C3,ALOX5AP,AQP9,ARNTL,ASS1,ATP1A1,BIRC3,BMP2,C5AR1,CASP4,CCL2,CCL20,CCL7,CCR1,CD68,CDC42EP4,CDK2,CEBPB,CHEK2,CTSL,CXCL1,CXCL3,CXCL5,CXCL6,DDIT4,DIO2,DNAJB9,ERN1,ERRFI1,FOSL1,FPR1,GCH1,GNAI2,HGF,HIF1A,HILPDA,HIPK2,HK2,HMOX1,HRH2,HSPA5,HSPA8,ICAM1,IFITM3,IGFBP5,IL15RA,IL1R1,IL1R2,IL1RAP,IL1RL1,IL1RL2,IL33,IL4R,IL6,IL8,IRAK2,ITGA2,ITGB3,ITPKC,JAK3,KCNK3,KDM6B,LAMC2,…
GO:BP	response to cytokine	GO:0034097	FALSE	4.19e-18	17.3776	914	340	61	21128	ASS1,BIRC3,CASP4,CCL2,CCL20,CCL7,CCR1,CDC42EP4,CEBPB,CXCL1,CXCL3,CXCL5,CXCL6,FOSL1,GCH1,HIF1A,HK2,HSPA5,ICAM1,IFITM3,IL15RA,IL1R1,IL1R2,IL1RAP,IL1RL1,IL1RL2,IL33,IL4R,IL6,IL8,IRAK2,JAK3,LAPTM5,LILRA6,LRP8,MAPK13,MT1X,MT2A,NFIL3,NFKBIA,NKX3-1,NLRP6,OSMR,PLSCR1,PTPN2,RELB,RFFL,SBNO2,SH2B2,SHMT2,SLC11A1,SPP1,SPRY4,TIMP1,TLR2,TNFAIP3,TNIP2,TRAF1,TRAF3IP2,TSLP,YBX3
GO:BP	cellular response to stimulus	GO:0051716	FALSE	4.67e-18	17.3306	7491	340	206	21128	ABCA1,ABCC3,ACVR1B,ADAM8,ADAMTS3,ADH4,ADORA3,AKR1C1,AKR1C3,ALKBH2,ALOX5AP,ANPEP,APCDD1L,APLN,AQP9,ARMC9,ARNTL,ARRDC3,ASS1,ATP1A1,BCL2A1,BCL3,BCL6,BIRC3,BMP2,C1QTNF1,C5AR1,CASP4,CCL2,CCL20,CCL7,CCR1,CD68,CDC42EP4,CDK2,CDKN1A,CEBPB,CEBPD,CHEK2,CHSY1,CLEC5A,CNTNAP1,CTSL,CXCL1,CXCL3,CXCL5,CXCL6,DDIT4,DNAJB9,EIF4EBP1,ERN1,ERRFI1,ESM1,FAM20C,FCGR3A,FGR,FOSL1,FPR1,GADD45B,GCH1,GGCT,GNAI2,HGF,HIF1A,HILPD…
GO:BP	cellular response to organic substance	GO:0071310	FALSE	9.84e-18	17.0071	1993	340	92	21128	ABCA1,AKR1C1,AKR1C3,AQP9,ARNTL,ASS1,ATP1A1,BIRC3,BMP2,CASP4,CCL2,CCL20,CCL7,CCR1,CD68,CDC42EP4,CEBPB,CHEK2,CTSL,CXCL1,CXCL3,CXCL5,CXCL6,DDIT4,DNAJB9,ERN1,ERRFI1,GNAI2,HIF1A,HK2,HRH2,HSPA5,HSPA8,ICAM1,IFITM3,IGFBP5,IL15RA,IL1R1,IL1R2,IL1RAP,IL1RL1,IL1RL2,IL33,IL4R,IL6,IL8,IRAK2,ITGA2,ITGB3,JAK3,LAPTM5,LDLR,LILRA6,LRP8,MAPK13,MSR1,MT1X,MT2A,NFIL3,NFKBIA,NKX3-1,NLRP6,NOD2,OSMR,P2RY2,P2RY6,PDGFRA,PGF…
GO:BP	regulation of response to stimulus	GO:0048583	FALSE	2.46e-17	16.6094	3998	340	138	21128	ABCA1,ACVR1B,ADAM8,ADAMTS3,AKR1C3,ALOX5AP,APCDD1L,APLN,ARMC9,ARNTL,ARRDC3,BCL3,BCL6,BIRC3,BMP2,C1QTNF1,C1RL,C2CD4A,C5AR1,CASP4,CCL2,CCL20,CCL7,CCR1,CEBPB,CFB,CHEK2,CHSY1,CXCL6,DDIT4,DNAJB9,ERN1,ERRFI1,ESM1,FAM20C,FCGR3A,FGR,FPR1,GADD45B,GCH1,GNAI2,HGF,HIF1A,HIPK2,HMGA2,HMOX1,HSPA5,ICAM1,IER3,IGFBP3,IGFBP5,IL1R1,IL1R2,IL1RL1,IL1RL2,IL33,IL4R,IL6,IL8,IRAK2,ITGA2,ITGA5,ITGB3,JAK3,LAMB1,LAPTM5,LDLR,L…
GO:BP	positive regulation of cellular process	GO:0048522	FALSE	2.5e-16	15.6023	5657	340	169	21128	ABCA1,ACVR1B,ADAM8,ADAMTS3,AKR1C1,AKR1C3,APLN,ARMC9,ARNTL,ARNTL2,ARRDC3,ASS1,B4GALT1,BAZ1A,BCL3,BCL6,BEND3,BIRC3,BMP2,C1QTNF1,C5AR1,CASP4,CCDC71L,CCL2,CCL20,CCL7,CCR1,CDC42EP4,CDK2,CDKN1A,CEBPB,CEBPD,CHEK2,CHSY1,CKS2,CXCL5,DDIT4,E2F3,EIF4EBP1,ELL2,ERN1,ESM1,ETS2,FAM20C,FCGR3A,FGR,FOSL1,FOSL2,GADD45B,GLIS3,GLRX,GNAI2,HGF,HIF1A,HILPDA,HIPK2,HMGA2,HMOX1,HSPA5,HSPA8,ICAM1,IGFBP3,IGFBP5,IKZF4,IL15RA,I…
GO:BP	immune system process	GO:0002376	FALSE	4.8e-16	15.3184	2683	340	106	21128	ACVR1B,ADAM8,APLN,ASS1,B4GALT1,BCL3,BCL6,BIRC3,C1RL,C5AR1,CASP4,CCL2,CCL20,CCL7,CCR1,CD68,CDC42EP4,CDKN1A,CEBPB,CFB,CLEC5A,CTSL,CXCL1,CXCL3,CXCL5,CXCL6,DNAJB9,FCGR3A,FGR,FPR1,FTH1,GCH1,HIF1A,HIPK2,HMOX1,HRH2,ICAM1,IFI30,IFITM3,IL15RA,IL1R1,IL1R2,IL1RAP,IL1RL1,IL1RL2,IL33,IL4R,IL6,IL8,IRAK2,ITGA2,ITGB3,JAK3,KLHL25,LAIR1,LAPTM5,LDLR,LIF,LILRA6,LRP8,MAFB,MARCO,MMP14,MSMP,MT1G,MYC,NDRG1,NFIL3,NFKBIA,…
GO:BP	regulation of biological process	GO:0050789	FALSE	7.61e-16	15.1189	12378	340	276	21128	ABCA1,ACVR1B,ADAM8,ADAMTS3,ADORA3,AKR1C1,AKR1C3,ALOX5AP,ANPEP,APCDD1L,APLN,ARMC9,ARNTL,ARNTL2,ARPC5L,ARRDC3,ASS1,ATP1A1,B4GALT1,BAZ1A,BCL2A1,BCL3,BCL6,BEND3,BEST1,BHLHE40,BIRC3,BMP2,C1QTNF1,C1RL,C2CD4A,C5AR1,CAPG,CARD6,CASP4,CCDC71L,CCL2,CCL20,CCL7,CCR1,CD68,CDC42EP4,CDK18,CDK2,CDKN1A,CEBPB,CEBPD,CFB,CHEK2,CHSY1,CKS2,CLEC5A,CNTNAP1,CXCL1,CXCL3,CXCL5,CXCL6,DDIT4,DIO2,DNAJB9,E2F3,EIF4EBP1,ELL2,ERMN…
GO:BP	biological process involved in interspecies interaction between organisms	GO:0044419	FALSE	1.56e-15	14.8074	1724	340	81	21128	ABCA1,ADAM8,ANPEP,ASS1,BCL3,BIRC3,BMP2,C15ORF48,C1RL,C5AR1,CASP4,CCL2,CCL20,CCL7,CD68,CDC42EP4,CEBPB,CFB,CLEC5A,CTSL,CXCL1,CXCL3,CXCL5,CXCL6,DDIT4,DIO2,FCGR3A,FGR,FKBP5,FOSL1,GCH1,HIF1A,HMGA2,HSPA8,ICAM1,IER3,IFITM3,IL1RAP,IL1RL2,IL33,IL4R,IL6,IL8,IRAK2,ITGA2,ITGA5,ITGAX,ITGB3,JAK3,LDLR,LRP8,MARCO,MLKL,NFKBIA,NLRP6,NOD2,PLSCR1,PTPN2,PTX3,PYGL,RELB,S100A9,SBNO2,SHC1,SHMT2,SIGLEC10,SLA,SLAMF8,SLC11…
GO:BP	cell communication	GO:0007154	FALSE	4.61e-15	14.3366	6573	340	183	21128	ABCA1,ACVR1B,ADAM8,ADAMTS3,ADORA3,AKR1C3,ANGPTL2,ANPEP,APCDD1L,APLN,ARMC9,ARNTL,ARRDC3,ATP1A1,BCL2A1,BCL3,BCL6,BIRC3,BMP2,C1QTNF1,C5AR1,CASP4,CCL2,CCL20,CCL7,CCR1,CD68,CDC42EP4,CDK2,CDKN1A,CEBPB,CHEK2,CHSY1,CLEC5A,CNTNAP1,CXCL1,CXCL3,CXCL5,CXCL6,DDIT4,DNAJB9,EIF4EBP1,ERN1,ERRFI1,ESM1,FAM20C,FCGR3A,FGR,FOSL1,FPR1,GADD45B,GGCT,GNAI2,HGF,HIF1A,HILPDA,HIPK2,HMGA2,HMOX1,HRH2,HSPA5,HSPA8,ICAM1,IER3,IFI…
GO:BP	cell death	GO:0008219	FALSE	6.03e-15	14.2194	2113	340	90	21128	ACVR1B,ADAM8,AKR1C3,B4GALT1,BCL2A1,BCL3,BCL6,BIRC3,BMP2,CARD6,CASP4,CCL2,CDKN1A,CEBPB,CHEK2,CLEC5A,CTSL,DDIT4,E2F3,ERN1,FOSL1,FOSL2,GADD45B,GGCT,GNAI2,HGF,HIF1A,HIPK2,HK2,HMGA2,HMOX1,HSPA5,ICAM1,IER3,IGFBP3,IL33,IL6,ITGA5,ITGB3,JAK3,LAPTM5,LRP8,MAP4K4,MLKL,MLLT11,MMP3,MUC1,MYC,NEK6,NFKBIA,NKX3-1,NLRP6,NME1,NOD2,OLR1,PHLDA1,PIM1,PLAUR,PLEKHN1,PLSCR1,PTPN2,PYGL,RFFL,S100A9,SHC1,SIX4,SLC6A6,SLC7A11,…
GO:BP	biological regulation	GO:0065007	FALSE	1.04e-14	13.9815	12926	340	281	21128	ABCA1,ACVR1B,ADAM8,ADAMTS3,ADH4,ADORA3,AKR1C1,AKR1C3,ALOX5AP,ANPEP,APCDD1L,APLN,ARMC9,ARNTL,ARNTL2,ARPC5L,ARRDC3,ASS1,ATP1A1,B4GALT1,BAZ1A,BCL2A1,BCL3,BCL6,BEND3,BEST1,BHLHE40,BIRC3,BMP2,C1QTNF1,C1RL,C2CD4A,C5AR1,CAPG,CARD6,CASP4,CCDC71L,CCL2,CCL20,CCL7,CCR1,CD68,CDC37L1,CDC42EP4,CDK18,CDK2,CDKN1A,CEBPB,CEBPD,CFB,CHEK2,CHSY1,CKS2,CLEC5A,CNTNAP1,CTSL,CXCL1,CXCL3,CXCL5,CXCL6,DDIT4,DIO2,DNAJB9,E2F3,…
GO:BP	cellular response to cytokine stimulus	GO:0071345	FALSE	1.22e-14	13.9121	823	340	53	21128	ASS1,BIRC3,CASP4,CCL2,CCL20,CCL7,CCR1,CDC42EP4,CEBPB,CXCL1,CXCL3,CXCL5,CXCL6,HIF1A,HK2,HSPA5,ICAM1,IFITM3,IL15RA,IL1R1,IL1R2,IL1RAP,IL1RL1,IL1RL2,IL33,IL4R,IL6,IL8,IRAK2,JAK3,LAPTM5,LILRA6,LRP8,MAPK13,MT1X,MT2A,NFIL3,NFKBIA,NKX3-1,NLRP6,OSMR,PTPN2,RFFL,SBNO2,SH2B2,SPRY4,TLR2,TNFAIP3,TNIP2,TRAF1,TRAF3IP2,TSLP,YBX3
GO:BP	regulation of multicellular organismal process	GO:0051239	FALSE	2.31e-14	13.6359	3004	340	110	21128	ABCA1,ACVR1B,ADAM8,ADORA3,APLN,ARNTL,ARRDC3,ATP1A1,BCL3,BCL6,BHLHE40,BMP2,C1QTNF1,C5AR1,CCL2,CCR1,CDKN1A,CEBPB,CHSY1,CLEC5A,CXCL6,DIO2,ERRFI1,FAM20C,FCGR3A,FGR,GCH1,GNAI2,HGF,HIF1A,HILPDA,HIPK2,HK2,HMGA2,HMOX1,HRH2,IGFBP5,IL15RA,IL1R1,IL1R2,IL1RAP,IL1RL1,IL1RL2,IL33,IL4R,IL6,IL8,ITGA2,ITGA5,ITGAX,ITGB3,JAK3,KDM6B,KLHL25,LAPTM5,LDLR,LIF,LPCAT3,LRP8,MAFB,MAP4K4,MAPK13,MFAP2,MMP14,MYC,NFKBIA,NKX3-1,…
GO:BP	positive regulation of multicellular organismal process	GO:0051240	FALSE	2.74e-14	13.5623	1695	340	78	21128	ABCA1,ACVR1B,ADAM8,APLN,ATP1A1,BCL3,BCL6,BMP2,C1QTNF1,C5AR1,CCL2,CCR1,CDKN1A,CEBPB,CLEC5A,DIO2,FAM20C,FCGR3A,FGR,GCH1,GNAI2,HGF,HIF1A,HILPDA,HIPK2,HK2,HMGA2,HMOX1,HRH2,IL15RA,IL1R1,IL1RAP,IL1RL1,IL1RL2,IL33,IL4R,IL6,IL8,ITGA2,ITGA5,ITGAX,ITGB3,JAK3,KDM6B,KLHL25,LAPTM5,LIF,LPCAT3,LRP8,MAPK13,MFAP2,MMP14,MYC,NKX3-1,NOD2,ORM2,P2RY2,PGF,PIM1,PNP,RGS2,SIX4,SLC11A1,SLC7A5,SLC9A1,SOX4,SPP1,TEAD4,TGM2,TH…
GO:BP	regulation of response to stress	GO:0080134	FALSE	3.12e-14	13.5061	1441	340	71	21128	ADAM8,ALOX5AP,BCL6,BIRC3,BMP2,C1QTNF1,C2CD4A,CASP4,CEBPB,CHEK2,CXCL6,DNAJB9,ERN1,ERRFI1,FGR,GADD45B,GCH1,HGF,HIF1A,HIPK2,HMGA2,HSPA5,IER3,IL1R1,IL1RL1,IL1RL2,IL33,IL6,IRAK2,ITGA2,LDLR,LPCAT3,LRP8,MAP4K4,MAPK13,MMP3,MUC1,MYC,NEAT1,NFKBIA,NKX3-1,NLRP6,NOD2,OSMR,PDGFA,PDGFRA,PLAUR,PLSCR1,PRRX1,PTPN2,S100A9,SBNO2,SIGLEC10,SLAMF8,SLC7A11,SNAI2,SOD2,SOX4,SPP1,THBD,TIFA,TLR2,TNFAIP3,TNIP2,TRAF1,TRAF3IP2…
GO:BP	regulation of signaling	GO:0023051	FALSE	3.25e-14	13.4887	3378	340	118	21128	ABCA1,ACVR1B,ADAM8,ADAMTS3,AKR1C3,APCDD1L,APLN,ARMC9,ARNTL,ARRDC3,BCL3,BCL6,BIRC3,BMP2,C1QTNF1,C5AR1,CASP4,CCL2,CCL20,CCL7,CCR1,CHEK2,CHSY1,DDIT4,DNAJB9,ERN1,ERRFI1,ESM1,FAM20C,FGR,GADD45B,GNAI2,HGF,HIF1A,HIPK2,HMOX1,HSPA5,ICAM1,IER3,IGFBP3,IGFBP5,IL1R1,IL1R2,IL6,IL8,IRAK2,ITGA5,ITGB3,JAK3,LAMB1,LAPTM5,LDLR,LIF,LRP8,LRRC4C,MAP4K4,MARCO,MIDN,MMP14,MUC1,MVP,MYC,NEK6,NETO2,NFKBIA,NKX3-1,NLRP6,NOD2,P…
GO:BP	response to oxygen-containing compound	GO:1901700	FALSE	3.54e-14	13.4508	1665	340	77	21128	ABCA1,ADH4,AKR1C1,AKR1C3,AQP9,ASS1,ATP1A1,C5AR1,CASP4,CCL2,CD68,CDK2,CEBPB,CHEK2,CXCL1,CXCL3,CXCL5,CXCL6,DDIT4,DIO2,ERN1,ERRFI1,FOSL1,GCH1,GNAI2,HGF,HIF1A,HMOX1,HRH2,HSPA5,ICAM1,IGFBP5,IL6,IL8,IRAK2,ITGA2,ITGB3,JAK3,KDM6B,LDLR,LRP8,MAPK13,MMP19,MMP3,NFKBIA,NKX3-1,NOD2,NUDT15,P2RY2,P2RY6,PDGFA,PDGFRA,PIM1,PTPN2,RGS2,S100A9,SBNO2,SH2B2,SHC1,SLC11A1,SLC1A3,SLC2A1,SLC7A5,SLC9A1,SNAI2,SOD2,SOX4,SPP1,T…
GO:BP	regulation of cell communication	GO:0010646	FALSE	4.09e-14	13.3883	3388	340	118	21128	ABCA1,ACVR1B,ADAM8,ADAMTS3,AKR1C3,APCDD1L,APLN,ARMC9,ARNTL,ARRDC3,BCL3,BCL6,BIRC3,BMP2,C1QTNF1,C5AR1,CASP4,CCL2,CCL20,CCL7,CCR1,CHEK2,CHSY1,DDIT4,DNAJB9,ERN1,ERRFI1,ESM1,FAM20C,FGR,GADD45B,GNAI2,HGF,HIF1A,HIPK2,HMOX1,HSPA5,ICAM1,IER3,IGFBP3,IGFBP5,IL1R1,IL1R2,IL6,IL8,IRAK2,ITGA2,ITGA5,ITGB3,JAK3,LAMB1,LAPTM5,LIF,LRP8,LRRC4C,MAP4K4,MARCO,MIDN,MMP14,MUC1,MVP,MYC,NEK6,NETO2,NFKBIA,NKX3-1,NLRP6,NOD2,…
GO:BP	positive regulation of metabolic process	GO:0009893	FALSE	4.33e-14	13.3639	3857	340	128	21128	ACVR1B,ADAM8,AKR1C1,AKR1C3,APLN,ARNTL,ARNTL2,ARRDC3,ASS1,BAZ1A,BCL3,BCL6,BEND3,BIRC3,BMP2,C1QTNF1,C5AR1,CCL2,CDK2,CDKN1A,CEBPB,CEBPD,CHEK2,CKS2,CLEC5A,DIO2,DNAJB9,E2F3,ELL2,ERN1,ETS2,FCGR3A,FGR,FOSL1,FOSL2,GLIS3,GNAI2,HGF,HIF1A,HILPDA,HIPK2,HMGA2,HMOX1,HSPA5,HSPA8,IER3,IKZF4,IL1R1,IL1RAP,IL1RL1,IL1RL2,IL33,IL4R,IL6,IL8,ITGA2,ITGA5,ITGAX,ITGB3,JAK3,KDM6B,KLHL25,LAPTM5,LDLR,LIF,LPCAT3,LRP8,MAFB,MAP…
GO:BP	regulation of signal transduction	GO:0009966	FALSE	1.47e-13	12.8338	2991	340	108	21128	ABCA1,ACVR1B,ADAM8,ADAMTS3,AKR1C3,APCDD1L,APLN,ARMC9,ARNTL,ARRDC3,BCL3,BCL6,BIRC3,BMP2,C1QTNF1,C5AR1,CASP4,CCL2,CCL20,CCL7,CCR1,CHEK2,CHSY1,DDIT4,DNAJB9,ERN1,ERRFI1,ESM1,FAM20C,FGR,GADD45B,GNAI2,HGF,HIF1A,HIPK2,HMOX1,HSPA5,ICAM1,IER3,IGFBP3,IGFBP5,IL1R1,IL1R2,IL6,IL8,IRAK2,ITGA5,ITGB3,JAK3,LAMB1,LAPTM5,LIF,MAP4K4,MARCO,MMP14,MUC1,MVP,MYC,NEK6,NETO2,NFKBIA,NKX3-1,NLRP6,NOD2,P2RY6,PDGFA,PDGFRA,PIK3…
GO:BP	response to biotic stimulus	GO:0009607	FALSE	1.65e-13	12.7822	1598	340	74	21128	ABCA1,ADAM8,ASS1,BCL3,BIRC3,BMP2,C15ORF48,C1RL,C5AR1,CASP4,CCL2,CCL20,CCL7,CD68,CDC42EP4,CEBPB,CFB,CLEC5A,CXCL1,CXCL3,CXCL5,CXCL6,DDIT4,DIO2,FCGR3A,FGR,FKBP5,FOSL1,GCH1,HIF1A,HMGA2,HSPA5,IER3,IFITM3,IL1RAP,IL1RL2,IL33,IL4R,IL6,IL8,IRAK2,ITGAX,JAK3,LAPTM5,LRP8,MARCO,MLKL,NFKBIA,NLRP6,NOD2,PLSCR1,PTPN2,PTX3,PYGL,RELB,S100A9,SBNO2,SHC1,SHMT2,SIGLEC10,SLA,SLAMF8,SLC11A1,SLC7A5,SOD2,THBD,TIFA,TLR2,TNF…
GO:BP	positive regulation of response to stimulus	GO:0048584	FALSE	1.65e-13	12.7816	2267	340	91	21128	ACVR1B,ADAM8,ADAMTS3,AKR1C3,ALOX5AP,ARMC9,ARNTL,ARRDC3,BIRC3,BMP2,C1QTNF1,C1RL,C2CD4A,C5AR1,CASP4,CCL2,CCL20,CCL7,CCR1,CEBPB,CFB,CHSY1,ERN1,ESM1,FGR,FPR1,GADD45B,GNAI2,HGF,HIF1A,HIPK2,HMOX1,ICAM1,IGFBP3,IGFBP5,IL1R1,IL1RL1,IL33,IL4R,IL6,IL8,IRAK2,ITGA2,ITGA5,ITGB3,LAMB1,LAPTM5,LDLR,LIF,MAP4K4,MAPK13,MARCO,MYC,NEAT1,NEK6,NFKBIA,NKX3-1,NLRP6,NOD2,OSMR,P2RY6,PDGFA,PDGFRA,PGF,PIK3R5,PLAUR,PLEKHA4,PLS…
GO:BP	programmed cell death	GO:0012501	FALSE	1.86e-13	12.73	1948	340	83	21128	ACVR1B,ADAM8,AKR1C3,B4GALT1,BCL2A1,BCL3,BCL6,BIRC3,BMP2,CARD6,CASP4,CCL2,CDKN1A,CEBPB,CHEK2,CLEC5A,CTSL,DDIT4,E2F3,ERN1,FOSL1,GADD45B,GGCT,GNAI2,HGF,HIF1A,HIPK2,HK2,HMGA2,HMOX1,HSPA5,ICAM1,IER3,IGFBP3,IL33,IL6,ITGA5,JAK3,LAPTM5,LRP8,MAP4K4,MLKL,MLLT11,MUC1,MYC,NEK6,NFKBIA,NKX3-1,NLRP6,NME1,NOD2,PHLDA1,PIM1,PLAUR,PLEKHN1,PLSCR1,PTPN2,PYGL,RFFL,S100A9,SHC1,SIX4,SLC7A11,SLC7A5,SLC9A1,SNAI2,SOD2,SOX4…
GO:BP	cell surface receptor signaling pathway	GO:0007166	FALSE	1.9e-13	12.7216	2869	340	105	21128	ABCA1,ACVR1B,ADAMTS3,ADORA3,APCDD1L,APLN,ARMC9,ARNTL,BCL2A1,BCL3,BCL6,BIRC3,BMP2,C5AR1,CASP4,CCL2,CCL20,CCL7,CCR1,CHSY1,CXCL1,CXCL3,CXCL5,CXCL6,DDIT4,ERRFI1,ESM1,FAM20C,FCGR3A,FGR,FPR1,GNAI2,HGF,HIF1A,HIPK2,HMOX1,HSPA5,ICAM1,IFITM3,IGFBP3,IGFBP5,IL15RA,IL1R1,IL1R2,IL1RAP,IL1RL1,IL1RL2,IL33,IL4R,IL6,IL8,IRAK2,ITGA2,ITGA5,ITGAX,ITGB3,JAK3,LAMB1,LAPTM5,LIF,LILRA6,LRP8,MARCO,MLKL,MLLT11,MMP14,MVP,NFK…
GO:BP	cellular response to oxygen-containing compound	GO:1901701	FALSE	4.06e-13	12.3915	1191	340	62	21128	ABCA1,ADH4,AKR1C1,AKR1C3,AQP9,ASS1,CASP4,CCL2,CD68,CDK2,CEBPB,CHEK2,CXCL1,CXCL3,CXCL5,CXCL6,DDIT4,ERN1,ERRFI1,GCH1,GNAI2,HGF,HIF1A,HRH2,HSPA5,ICAM1,IGFBP5,IL6,IL8,IRAK2,ITGA2,ITGB3,JAK3,KDM6B,LDLR,LRP8,MAPK13,MMP3,NFKBIA,NOD2,P2RY2,P2RY6,PDGFRA,PIM1,PTPN2,SBNO2,SH2B2,SHC1,SLC1A3,SLC7A5,SLC9A1,SNAI2,SOD2,SOX4,SPP1,TGM2,TLR2,TNFAIP3,TNIP2,TXN,VDR,ZNF703
GO:BP	response to other organism	GO:0051707	FALSE	5.17e-13	12.2864	1557	340	72	21128	ABCA1,ADAM8,ASS1,BCL3,BIRC3,BMP2,C15ORF48,C1RL,C5AR1,CASP4,CCL2,CCL20,CCL7,CD68,CDC42EP4,CEBPB,CFB,CLEC5A,CXCL1,CXCL3,CXCL5,CXCL6,DDIT4,DIO2,FCGR3A,FGR,FKBP5,FOSL1,GCH1,HIF1A,HMGA2,IER3,IFITM3,IL1RAP,IL1RL2,IL33,IL4R,IL6,IL8,IRAK2,ITGAX,JAK3,LRP8,MARCO,MLKL,NFKBIA,NLRP6,NOD2,PLSCR1,PTPN2,PTX3,PYGL,RELB,S100A9,SBNO2,SHC1,SHMT2,SIGLEC10,SLA,SLAMF8,SLC11A1,SLC7A5,SOD2,THBD,TIFA,TLR2,TNFAIP3,TNFSF8,T…
GO:BP	response to external biotic stimulus	GO:0043207	FALSE	5.72e-13	12.2424	1560	340	72	21128	ABCA1,ADAM8,ASS1,BCL3,BIRC3,BMP2,C15ORF48,C1RL,C5AR1,CASP4,CCL2,CCL20,CCL7,CD68,CDC42EP4,CEBPB,CFB,CLEC5A,CXCL1,CXCL3,CXCL5,CXCL6,DDIT4,DIO2,FCGR3A,FGR,FKBP5,FOSL1,GCH1,HIF1A,HMGA2,IER3,IFITM3,IL1RAP,IL1RL2,IL33,IL4R,IL6,IL8,IRAK2,ITGAX,JAK3,LRP8,MARCO,MLKL,NFKBIA,NLRP6,NOD2,PLSCR1,PTPN2,PTX3,PYGL,RELB,S100A9,SBNO2,SHC1,SHMT2,SIGLEC10,SLA,SLAMF8,SLC11A1,SLC7A5,SOD2,THBD,TIFA,TLR2,TNFAIP3,TNFSF8,T…
GO:BP	regulation of cell population proliferation	GO:0042127	FALSE	6.47e-13	12.1892	1677	340	75	21128	ADORA3,AKR1C3,APLN,B4GALT1,BCL6,BMP2,C5AR1,CCL2,CDK2,CDKN1A,CEBPB,CXCL1,CXCL5,E2F3,ERN1,ERRFI1,ESM1,FCGR3A,FOSL1,FOSL2,FTH1,GNAI2,HIF1A,HILPDA,HIPK2,HMGA2,HMOX1,IFI30,IGFBP3,IGFBP5,IL33,IL4R,IL6,IL8,ITGA2,ITGAX,ITGB3,JAK3,LAMB1,LAMC2,LIF,MYC,NAMPT,NDRG1,NEAT1,NFKBIA,NKX3-1,NME1,NOD2,OSMR,P2RY6,PDGFA,PDGFRA,PGF,PIM1,PNP,PRRX1,PTPN2,SHC1,SHMT2,SIX4,SLC7A11,SLC7A5,SNAI2,SOD2,SOX4,TIMP1,TLR2,TNFAIP3,…
GO:BP	signaling	GO:0023052	FALSE	1.27e-12	11.8954	6462	340	175	21128	ABCA1,ACVR1B,ADAM8,ADAMTS3,ADORA3,AKR1C3,ANGPTL2,ANPEP,APCDD1L,APLN,ARMC9,ARNTL,ARRDC3,BCL2A1,BCL3,BCL6,BIRC3,BMP2,C1QTNF1,C5AR1,CASP4,CCL2,CCL20,CCL7,CCR1,CDC42EP4,CDK2,CDKN1A,CEBPB,CHEK2,CHSY1,CLEC5A,CNTNAP1,CXCL1,CXCL3,CXCL5,CXCL6,DDIT4,DNAJB9,EIF4EBP1,ERN1,ERRFI1,ESM1,FAM20C,FCGR3A,FGR,FPR1,GADD45B,GGCT,GNAI2,HGF,HIF1A,HILPDA,HIPK2,HMGA2,HMOX1,HRH2,HSPA5,ICAM1,IER3,IFITM3,IGFBP3,IGFBP5,IL15RA…
GO:BP	cytokine-mediated signaling pathway	GO:0019221	FALSE	1.34e-12	11.8724	480	340	38	21128	BIRC3,CASP4,CCL2,CCL20,CCL7,CCR1,CXCL1,CXCL3,CXCL5,CXCL6,HIF1A,IFITM3,IL15RA,IL1R1,IL1R2,IL1RAP,IL1RL1,IL1RL2,IL33,IL4R,IL6,IL8,IRAK2,JAK3,LAPTM5,LILRA6,LRP8,NFKBIA,NLRP6,OSMR,PTPN2,RFFL,SH2B2,TNFAIP3,TNIP2,TRAF1,TRAF3IP2,TSLP
GO:BP	regulation of cell death	GO:0010941	FALSE	2.15e-12	11.6677	1638	340	73	21128	ADAM8,AKR1C3,B4GALT1,BCL2A1,BCL3,BCL6,BIRC3,BMP2,CARD6,CASP4,CCL2,CDKN1A,CEBPB,CHEK2,CLEC5A,DDIT4,E2F3,FOSL1,GADD45B,GNAI2,HGF,HIF1A,HIPK2,HMGA2,HMOX1,HSPA5,ICAM1,IER3,IGFBP3,IL6,ITGA5,ITGB3,JAK3,LAPTM5,LRP8,MAP4K4,MLLT11,MMP3,MUC1,MYC,NKX3-1,NME1,NOD2,PHLDA1,PIM1,PLAUR,PLEKHN1,PTPN2,RFFL,S100A9,SHC1,SIX4,SLC6A6,SLC7A11,SLC7A5,SLC9A1,SNAI2,SNCG,SOD2,SOX4,ST3GAL1,TGM2,TIMP1,TNFAIP3,TNFAIP8L3,TNFRS…
GO:BP	regulation of response to external stimulus	GO:0032101	FALSE	2.32e-12	11.6343	1030	340	56	21128	ADAM8,ALOX5AP,BCL6,BIRC3,C1QTNF1,C2CD4A,C5AR1,CASP4,CCL2,CCL7,CCR1,CEBPB,CXCL6,FGR,HGF,IER3,IL1R1,IL1RL1,IL1RL2,IL33,IL6,IL8,IRAK2,ITGA2,LDLR,LPCAT3,LRP8,MAPK13,MMP3,NEAT1,NFKBIA,NLRP6,NOD2,OSMR,PDGFA,PDGFRA,PGF,PLAUR,PLSCR1,PTPN2,S100A9,SBNO2,SIGLEC10,SLAMF8,SNAI2,SPP1,THBD,TIFA,TLR2,TNFAIP3,TNIP2,TRAF3IP2,TSLP,UBASH3B,VDR,VEGFA
GO:BP	intracellular signal transduction	GO:0035556	FALSE	2.45e-12	11.6116	2667	340	98	21128	ABCA1,ADAM8,AKR1C3,ARNTL,ARRDC3,BCL2A1,BCL3,BCL6,BIRC3,BMP2,C1QTNF1,C5AR1,CASP4,CCL2,CCL20,CCL7,CCR1,CDC42EP4,CDK2,CDKN1A,CEBPB,CHEK2,CXCL1,DDIT4,EIF4EBP1,ERN1,ERRFI1,FCGR3A,FGR,FPR1,GADD45B,GNAI2,HGF,HIF1A,HIPK2,HMGA2,HMOX1,ICAM1,IER3,IGFBP3,IGFBP5,IL6,IL8,IRAK2,ITGB3,JAK3,LAPTM5,LIF,MAP4K4,MAPK13,MARCO,MLLT11,MUC1,MYC,NDRG1,NEK6,NFKBIA,NKX3-1,NLRP6,NOD2,P2RY6,PDGFA,PDGFRA,PIK3R5,PLAUR,PTPN2,RAS…
GO:BP	apoptotic process	GO:0006915	FALSE	4.2e-12	11.3766	1894	340	79	21128	ACVR1B,ADAM8,AKR1C3,B4GALT1,BCL2A1,BCL3,BCL6,BIRC3,BMP2,CARD6,CASP4,CCL2,CDKN1A,CEBPB,CHEK2,CLEC5A,CTSL,DDIT4,E2F3,ERN1,FOSL1,GADD45B,GGCT,GNAI2,HGF,HIF1A,HIPK2,HK2,HMGA2,HMOX1,HSPA5,ICAM1,IER3,IGFBP3,IL33,IL6,ITGA5,JAK3,LRP8,MAP4K4,MLLT11,MUC1,MYC,NEK6,NFKBIA,NKX3-1,NME1,NOD2,PHLDA1,PIM1,PLAUR,PLEKHN1,PLSCR1,PTPN2,RFFL,S100A9,SHC1,SIX4,SLC7A11,SLC7A5,SLC9A1,SNAI2,SOD2,SOX4,ST3GAL1,TGM2,TIMP1,TLR…
GO:BP	regulation of inflammatory response	GO:0050727	FALSE	4.41e-12	11.3558	371	340	33	21128	ADAM8,ALOX5AP,BCL6,BIRC3,C2CD4A,CASP4,CEBPB,FGR,HGF,IER3,IL1R1,IL1RL1,IL1RL2,IL33,IL6,ITGA2,LDLR,LPCAT3,MAPK13,MMP3,NEAT1,NFKBIA,NLRP6,NOD2,OSMR,PTPN2,S100A9,SBNO2,SIGLEC10,SLAMF8,TLR2,TNFAIP3,TSLP
GO:BP	cell population proliferation	GO:0008283	FALSE	5.72e-12	11.2426	1985	340	81	21128	ADORA3,AKR1C3,APLN,B4GALT1,BCL6,BMP2,C5AR1,CCL2,CDK2,CDKN1A,CEBPB,CKS2,CXCL1,CXCL5,E2F3,ERN1,ERRFI1,ESM1,FCGR3A,FGR,FOSL1,FOSL2,FTH1,GNAI2,HGF,HIF1A,HILPDA,HIPK2,HMGA2,HMOX1,IFI30,IGFBP3,IGFBP5,IL33,IL4R,IL6,IL8,ITGA2,ITGAX,ITGB3,JAK3,LAMB1,LAMC2,LIF,MMP14,MYC,NAMPT,NDRG1,NEAT1,NFKBIA,NKX3-1,NME1,NOD2,OSMR,P2RY6,PDGFA,PDGFRA,PGF,PIM1,PNP,PRRX1,PTPN2,SERPINB1,SHC1,SHMT2,SIX4,SLC11A1,SLC7A11,SLC7A5…
GO:BP	positive regulation of cell population proliferation	GO:0008284	FALSE	6.03e-12	11.2195	953	340	53	21128	AKR1C3,APLN,B4GALT1,BCL6,BMP2,C5AR1,CDK2,CDKN1A,CXCL5,E2F3,ERN1,ESM1,FCGR3A,FOSL1,FOSL2,GNAI2,HIF1A,HILPDA,HIPK2,HMGA2,HMOX1,IGFBP5,IL6,ITGA2,ITGAX,ITGB3,JAK3,LAMB1,LAMC2,LIF,MYC,NAMPT,NEAT1,NKX3-1,NME1,NOD2,OSMR,P2RY6,PDGFA,PDGFRA,PGF,PIM1,PNP,PRRX1,SHC1,SHMT2,SLC7A5,SOX4,TIMP1,TNFAIP3,TSLP,VEGFA,ZNF703
GO:BP	positive regulation of signal transduction	GO:0009967	FALSE	8.28e-12	11.0819	1528	340	69	21128	ACVR1B,ADAM8,ADAMTS3,AKR1C3,ARMC9,ARNTL,ARRDC3,BIRC3,BMP2,C1QTNF1,C5AR1,CASP4,CCL2,CCL20,CCL7,CCR1,CHSY1,ERN1,ESM1,FGR,GADD45B,GNAI2,HGF,HIF1A,HIPK2,HMOX1,ICAM1,IGFBP3,IGFBP5,IL1R1,IL6,ITGA5,ITGB3,LAMB1,LAPTM5,LIF,MAP4K4,MARCO,MYC,NEK6,NKX3-1,NLRP6,NOD2,P2RY6,PDGFA,PDGFRA,PIK3R5,PLAUR,PLEKHA4,PRRX1,PTPN2,S100A9,SHC1,SLC20A1,SLC9A1,SOX4,STX1A,TGM2,TIFA,TLR2,TNFAIP3,TNFAIP8L3,TNIP2,TRAF1,TRAF3IP2,T…
GO:BP	regulation of cellular process	GO:0050794	FALSE	1.13e-11	10.9488	11139	340	249	21128	ABCA1,ACVR1B,ADAM8,ADAMTS3,ADORA3,AKR1C1,AKR1C3,ANPEP,APCDD1L,APLN,ARMC9,ARNTL,ARNTL2,ARPC5L,ARRDC3,ASS1,ATP1A1,B4GALT1,BAZ1A,BCL2A1,BCL3,BCL6,BEND3,BHLHE40,BIRC3,BMP2,C1QTNF1,C2CD4A,C5AR1,CAPG,CARD6,CASP4,CCDC71L,CCL2,CCL20,CCL7,CCR1,CDC42EP4,CDK18,CDK2,CDKN1A,CEBPB,CEBPD,CHEK2,CHSY1,CKS2,CLEC5A,CNTNAP1,CXCL1,CXCL3,CXCL5,CXCL6,DDIT4,DIO2,DNAJB9,E2F3,EIF4EBP1,ELL2,ERMN,ERN1,ERRFI1,ESM1,ETS2,FAM20…
GO:BP	regulation of programmed cell death	GO:0043067	FALSE	2.22e-11	10.6528	1483	340	67	21128	ADAM8,AKR1C3,B4GALT1,BCL2A1,BCL3,BCL6,BIRC3,BMP2,CARD6,CASP4,CCL2,CDKN1A,CEBPB,CHEK2,CLEC5A,E2F3,FOSL1,GADD45B,GNAI2,HGF,HIF1A,HIPK2,HMGA2,HMOX1,HSPA5,ICAM1,IER3,IGFBP3,IL6,ITGA5,JAK3,LAPTM5,LRP8,MAP4K4,MLLT11,MUC1,MYC,NKX3-1,NME1,NOD2,PHLDA1,PIM1,PLAUR,PLEKHN1,PTPN2,RFFL,S100A9,SHC1,SIX4,SLC7A11,SLC7A5,SLC9A1,SNAI2,SOD2,SOX4,ST3GAL1,TGM2,TIMP1,TNFAIP3,TNFAIP8L3,TNFRSF10D,TNIP2,TRAF1,TSLP,VDR,VEG…
GO:BP	negative regulation of biological process	GO:0048519	FALSE	2.24e-11	10.6503	5927	340	162	21128	ABCA1,ACVR1B,ADAM8,ADORA3,AKR1C3,APCDD1L,APLN,ARNTL,ARRDC3,ASS1,ATP1A1,B4GALT1,BAZ1A,BCL2A1,BCL3,BCL6,BEND3,BHLHE40,BIRC3,BMP2,C1QTNF1,CAPG,CCL2,CCR1,CD68,CDK2,CDKN1A,CEBPB,CEBPD,CHEK2,CHSY1,CLEC5A,CXCL1,DDIT4,DNAJB9,E2F3,EIF4EBP1,ERN1,ERRFI1,ETS2,FGR,FOSL1,FTH1,GADD45B,GLIS3,GNAI2,HGF,HIF1A,HIPK2,HK2,HMGA2,HMOX1,HSPA5,HSPA8,ICAM1,IER3,IFI30,IFITM3,IGFBP3,IGFBP5,IKZF4,IL1R2,IL1RL1,IL33,IL4R,IL6,I…
GO:BP	regulation of immune system process	GO:0002682	FALSE	3.07e-11	10.5122	1493	340	67	21128	ACVR1B,ADAM8,BCL6,BIRC3,C1RL,C5AR1,CCL2,CCL20,CCL7,CCR1,CD68,CDKN1A,CEBPB,CFB,CXCL6,DNAJB9,FCGR3A,FGR,FPR1,HIF1A,HMOX1,ICAM1,IL15RA,IL1R1,IL1RL1,IL1RL2,IL33,IL4R,IL6,IL8,IRAK2,ITGA2,ITGB3,JAK3,KLHL25,LAPTM5,LDLR,LIF,LRP8,MAFB,MMP14,MYC,NFKBIA,NLRP6,NOD2,ORM2,PGF,PLSCR1,PNP,PTPN2,SH2B2,SIAE,SLAMF8,SLC11A1,SLC7A11,SLC7A5,SNAI2,SOX4,TIFA,TLR2,TNFAIP3,TNFRSF9,TNFSF8,TNIP2,TSLP,UBASH3B,VEGFA
GO:BP	regulation of intracellular signal transduction	GO:1902531	FALSE	3.14e-11	10.5024	1725	340	73	21128	ABCA1,ADAM8,AKR1C3,ARNTL,ARRDC3,BCL3,BCL6,BIRC3,BMP2,C1QTNF1,C5AR1,CCL2,CCL20,CCL7,CCR1,CHEK2,DDIT4,ERN1,ERRFI1,FGR,GADD45B,GNAI2,HGF,HIF1A,HIPK2,HMOX1,ICAM1,IGFBP3,IGFBP5,IL6,ITGB3,LAPTM5,LIF,MAP4K4,MARCO,MUC1,MYC,NEK6,NFKBIA,NKX3-1,NLRP6,NOD2,P2RY6,PDGFA,PDGFRA,PIK3R5,PLAUR,PTPN2,RFFL,RGS2,RPF2,RRS1,S100A9,SH2B2,SHC1,SLC20A1,SLC9A1,SNAI2,SOD2,SOX4,SPRED3,SPRY4,TGM2,TIFA,TLR2,TNFAIP3,TNFAIP8L3,T…
GO:BP	positive regulation of cell communication	GO:0010647	FALSE	3.54e-11	10.451	1729	340	73	21128	ACVR1B,ADAM8,ADAMTS3,AKR1C3,ARMC9,ARNTL,ARRDC3,BIRC3,BMP2,C1QTNF1,C5AR1,CASP4,CCL2,CCL20,CCL7,CCR1,CHSY1,ERN1,ESM1,FGR,GADD45B,GNAI2,HGF,HIF1A,HIPK2,HMOX1,ICAM1,IGFBP3,IGFBP5,IL1R1,IL6,ITGA2,ITGA5,ITGB3,LAMB1,LAPTM5,LIF,MAP4K4,MARCO,MYC,NEK6,NKX3-1,NLRP6,NOD2,P2RY6,PDGFA,PDGFRA,PIK3R5,PLAUR,PLEKHA4,PRRX1,PTPN2,S100A9,SHC1,SLC1A3,SLC20A1,SLC4A8,SLC9A1,SOX4,SPP1,STX1A,TGM2,TIFA,TLR2,TNFAIP3,TNFAIP8…
GO:BP	signal transduction	GO:0007165	FALSE	3.65e-11	10.4372	6012	340	163	21128	ABCA1,ACVR1B,ADAM8,ADAMTS3,ADORA3,AKR1C3,ANPEP,APCDD1L,APLN,ARMC9,ARNTL,ARRDC3,BCL2A1,BCL3,BCL6,BIRC3,BMP2,C1QTNF1,C5AR1,CASP4,CCL2,CCL20,CCL7,CCR1,CDC42EP4,CDK2,CDKN1A,CEBPB,CHEK2,CHSY1,CLEC5A,CNTNAP1,CXCL1,CXCL3,CXCL5,CXCL6,DDIT4,DNAJB9,EIF4EBP1,ERN1,ERRFI1,ESM1,FAM20C,FCGR3A,FGR,FPR1,GADD45B,GGCT,GNAI2,HGF,HIF1A,HIPK2,HMGA2,HMOX1,HRH2,HSPA5,ICAM1,IER3,IFITM3,IGFBP3,IGFBP5,IL15RA,IL1R1,IL1R2,IL…
GO:BP	immune response	GO:0006955	FALSE	9.04e-11	10.0439	1922	340	77	21128	ADAM8,APLN,ASS1,BCL3,BCL6,BIRC3,C1RL,C5AR1,CASP4,CCL2,CCL20,CCL7,CCR1,CD68,CDC42EP4,CEBPB,CFB,CLEC5A,CTSL,CXCL1,CXCL3,CXCL5,CXCL6,FCGR3A,FGR,FPR1,FTH1,GCH1,HMOX1,HRH2,ICAM1,IFITM3,IL1R1,IL1R2,IL1RAP,IL1RL1,IL1RL2,IL33,IL4R,IL6,IL8,IRAK2,JAK3,LAIR1,LAPTM5,LIF,LILRA6,LRP8,MARCO,NFIL3,NFKBIA,NLRP6,NOD2,PIK3R5,PLSCR1,PNP,PTPN2,PTX3,RELB,S100A9,SBNO2,SH2B2,SHMT2,SIGLEC10,SLA,SLAMF8,SLC11A1,SLC7A5,ST3G…
GO:BP	regulation of apoptotic process	GO:0042981	FALSE	9.94e-11	10.0026	1454	340	65	21128	ADAM8,AKR1C3,B4GALT1,BCL2A1,BCL3,BCL6,BIRC3,BMP2,CARD6,CASP4,CCL2,CEBPB,CHEK2,CLEC5A,E2F3,FOSL1,GADD45B,GNAI2,HGF,HIF1A,HIPK2,HMGA2,HMOX1,HSPA5,ICAM1,IER3,IGFBP3,IL6,ITGA5,JAK3,LRP8,MAP4K4,MLLT11,MUC1,MYC,NKX3-1,NME1,NOD2,PHLDA1,PIM1,PLAUR,PLEKHN1,PTPN2,RFFL,S100A9,SHC1,SIX4,SLC7A11,SLC7A5,SLC9A1,SNAI2,SOD2,SOX4,ST3GAL1,TGM2,TIMP1,TNFAIP3,TNFAIP8L3,TNFRSF10D,TNIP2,TRAF1,TSLP,VDR,VEGFA,YBX3
GO:BP	positive regulation of signaling	GO:0023056	FALSE	1.06e-10	9.97496	1727	340	72	21128	ACVR1B,ADAM8,ADAMTS3,AKR1C3,ARMC9,ARNTL,ARRDC3,BIRC3,BMP2,C1QTNF1,C5AR1,CASP4,CCL2,CCL20,CCL7,CCR1,CHSY1,ERN1,ESM1,FGR,GADD45B,GNAI2,HGF,HIF1A,HIPK2,HMOX1,ICAM1,IGFBP3,IGFBP5,IL1R1,IL6,ITGA5,ITGB3,LAMB1,LAPTM5,LIF,MAP4K4,MARCO,MYC,NEK6,NKX3-1,NLRP6,NOD2,P2RY6,PDGFA,PDGFRA,PIK3R5,PLAUR,PLEKHA4,PRRX1,PTPN2,S100A9,SHC1,SLC1A3,SLC20A1,SLC4A8,SLC9A1,SOX4,SPP1,STX1A,TGM2,TIFA,TLR2,TNFAIP3,TNFAIP8L3,TNI…
GO:BP	positive regulation of macromolecule metabolic process	GO:0010604	FALSE	1.52e-10	9.8189	3540	340	113	21128	ACVR1B,ADAM8,APLN,ARNTL,ARNTL2,ARRDC3,BAZ1A,BCL3,BCL6,BIRC3,BMP2,C1QTNF1,C5AR1,CCL2,CDK2,CDKN1A,CEBPB,CEBPD,CHEK2,CKS2,CLEC5A,DNAJB9,E2F3,ELL2,ERN1,ETS2,FCGR3A,FGR,FOSL1,FOSL2,GLIS3,HGF,HIF1A,HILPDA,HIPK2,HMGA2,HMOX1,HSPA5,HSPA8,IER3,IKZF4,IL1R1,IL1RAP,IL1RL1,IL1RL2,IL33,IL4R,IL6,IL8,ITGA2,ITGA5,ITGAX,ITGB3,JAK3,KDM6B,LAPTM5,LDLR,LIF,LPCAT3,LRP8,MAFB,MAPK13,MARCO,MLLT11,MMP14,MPV17L2,MUC1,MYC,NAM…
GO:BP	multicellular organismal process	GO:0032501	FALSE	5e-10	9.30142	7657	340	189	21128	ABCA1,ABCC3,ACVR1B,ADAM8,ADAMTS3,ADORA3,AKR1C1,AKR1C3,ALOX5AP,ANPEP,APLN,AQP9,ARNTL,ARRDC3,ASS1,ATP1A1,B4GALT1,BCL3,BCL6,BEST1,BHLHE40,BIRC3,BMP2,C1GALT1,C1QTNF1,C2CD4A,C5AR1,CAPG,CCL2,CCR1,CDKN1A,CEBPB,CEBPD,CHSY1,CLEC5A,CLMP,CNTNAP1,CTSL,CXCL1,CXCL6,DDIT4,DIO2,DNAJB9,ERMN,ERRFI1,ESM1,ETS2,FAM20C,FCGR3A,FGR,FOSL1,GCH1,GNAI2,HGF,HIF1A,HILPDA,HIPK2,HK2,HMGA2,HMOX1,HRH2,HSPA5,ICAM1,IER3,IGFBP3,IGFB…
GO:BP	negative regulation of cellular process	GO:0048523	FALSE	5.93e-10	9.22683	4755	340	136	21128	ABCA1,ACVR1B,ADAM8,ADORA3,AKR1C3,APCDD1L,APLN,ARNTL,ARRDC3,ASS1,ATP1A1,B4GALT1,BCL2A1,BCL3,BCL6,BEND3,BHLHE40,BIRC3,BMP2,C1QTNF1,CAPG,CCL2,CDK2,CDKN1A,CEBPB,CEBPD,CHEK2,CLEC5A,CXCL1,DDIT4,DNAJB9,E2F3,EIF4EBP1,ERRFI1,ETS2,FGR,FOSL1,FTH1,GADD45B,GLIS3,GNAI2,HGF,HIF1A,HIPK2,HK2,HMGA2,HMOX1,HSPA5,HSPA8,ICAM1,IER3,IFI30,IGFBP3,IGFBP5,IKZF4,IL1R2,IL33,IL4R,IL6,IL8,ITGA5,ITGB3,JAK3,KLHL25,LAPTM5,LDLR,LI…
GO:BP	cell activation	GO:0001775	FALSE	6.61e-10	9.17974	1142	340	55	21128	ADAM8,BCL3,BCL6,C1QTNF1,C5AR1,CCL2,CDKN1A,CEBPB,CTSL,CXCL6,DNAJB9,FCGR3A,FGR,HMOX1,ICAM1,IL15RA,IL1RL1,IL1RL2,IL33,IL4R,IL6,IL8,ITGB3,JAK3,KLHL25,LAPTM5,LDLR,MAFB,MMP14,MT1G,NDRG1,NFIL3,NOD2,PDGFA,PDGFRA,PLSCR1,PNP,PTPN2,RELB,SBNO2,SLAMF8,SLC11A1,SLC7A11,SOX4,ST3GAL1,THBD,TIMP1,TLR2,TNFAIP3,TNFRSF9,TNFSF8,TNIP2,TRAF3IP2,TSLP,UBASH3B
GO:BP	defense response to other organism	GO:0098542	FALSE	8.29e-10	9.08132	1221	340	57	21128	ADAM8,ASS1,BCL3,BIRC3,C1RL,C5AR1,CASP4,CCL2,CCL20,CCL7,CDC42EP4,CEBPB,CFB,CLEC5A,CXCL1,CXCL3,CXCL5,CXCL6,DDIT4,FCGR3A,FGR,GCH1,IFITM3,IL1RAP,IL1RL2,IL33,IL4R,IL6,IL8,IRAK2,ITGAX,JAK3,LRP8,MARCO,MLKL,NFKBIA,NLRP6,NOD2,PLSCR1,PTPN2,PTX3,RELB,S100A9,SHC1,SHMT2,SIGLEC10,SLA,SLAMF8,SLC11A1,TIFA,TLR2,TNFAIP3,TNFSF8,TNIP2,TRAF3IP2,TREM1,TSLP
GO:BP	response to endogenous stimulus	GO:0009719	FALSE	3.52e-09	8.45401	1692	340	68	21128	ABCA1,ACVR1B,ADAMTS3,AKR1C1,AKR1C3,APLN,AQP9,ARNTL,ASS1,ATP1A1,BMP2,CASP4,CCL2,CD68,CEBPB,CTSL,DDIT4,ERN1,ERRFI1,FAM20C,FOSL1,GNAI2,HGF,HIF1A,HIPK2,HMOX1,HRH2,HSPA5,HSPA8,ICAM1,IGFBP5,IL4R,IL6,IL8,ITGA2,ITGA5,ITGB3,JAK3,LDLR,LRP8,MAPK13,MMP14,MMP19,MT1G,MYC,NKX3-1,NOD2,P2RY2,P2RY6,PDGFA,PDGFRA,PGF,PTPN2,SH2B2,SHC1,SLC1A3,SLC2A1,SLC7A5,SLC9A1,SNAI2,SPP1,SPRED3,SPRY4,TGM2,TIMP1,TLR2,VEGFA,ZNF703
GO:BP	homeostatic process	GO:0042592	FALSE	5.18e-09	8.28583	1666	340	67	21128	ABCA1,ACVR1B,ADAM8,AKR1C1,ARNTL,ARRDC3,ATP1A1,BCL6,CA12,CCL2,CCL7,CCR1,CEBPB,CXCL6,DIO2,ERN1,FTH1,GNAI2,HIF1A,HIPK2,HK2,HMOX1,ICAM1,IGFBP5,IL4R,IL6,ITGB3,JAK3,KDM6B,LDLR,LPCAT3,MAFB,MFAP2,MT1E,MT1G,MT1M,MT1X,MT2A,MYC,NLRP6,NOD2,P2RY2,P2RY6,PTPN2,PYGL,S100A9,SERPINA3,SH2B2,SLAMF8,SLC11A1,SLC1A3,SLC2A1,SLC39A8,SLC4A8,SLC7A11,SLC9A1,SOD2,SOX4,SPP1,STEAP1,TGM2,TNFAIP3,TRAF3IP2,TXN,UBASH3B,VDR,VEGFA
GO:BP	anatomical structure formation involved in morphogenesis	GO:0048646	FALSE	5.6e-09	8.25219	1168	340	54	21128	ADAM8,ANPEP,APLN,B4GALT1,BCL3,BCL6,BMP2,C1GALT1,C5AR1,CCL2,CNTNAP1,ESM1,ETS2,FAM20C,HGF,HIF1A,HIPK2,HK2,HMGA2,HMOX1,IL4R,IL6,IL8,ITGA2,ITGA5,ITGAX,ITGB3,KDM6B,LAMB1,LRP8,MAFB,MMP14,MMP19,NKX3-1,PDGFA,PDGFRA,PGF,PGK1,PIM1,SAT1,SBNO2,SHC1,SIX4,SNAI2,SOX4,ST14,TEAD4,TGM2,THBS2,TLR2,TM4SF1,TMEM2,TNFAIP3,VEGFA
GO:BP	positive regulation of intracellular signal transduction	GO:1902533	FALSE	7.08e-09	8.14979	995	340	49	21128	ADAM8,AKR1C3,ARRDC3,BIRC3,BMP2,C1QTNF1,C5AR1,CCL2,CCL20,CCL7,CCR1,ERN1,FGR,GADD45B,GNAI2,HGF,HIPK2,HMOX1,ICAM1,IGFBP3,IGFBP5,IL6,ITGB3,LAPTM5,LIF,MAP4K4,MARCO,MYC,NEK6,NKX3-1,NOD2,P2RY6,PDGFA,PDGFRA,PIK3R5,PTPN2,S100A9,SHC1,SLC20A1,SLC9A1,TGM2,TIFA,TLR2,TNFAIP8L3,TNIP2,TRAF1,TRAF3IP2,TXN,VEGFA
GO:BP	hemopoiesis	GO:0030097	FALSE	8.79e-09	8.05614	931	340	47	21128	ACVR1B,ADAM8,BCL3,BCL6,BMP2,CCR1,CEBPB,CEBPD,CLEC5A,CTSL,DNAJB9,FAM20C,GPATCH4,HIF1A,HIPK2,IL15RA,IL1RL2,IL4R,IL6,JAK3,KLHL25,LIF,MAFB,MMP14,MT1G,MYC,NFIL3,NFKBIA,PDGFRA,PIM1,PNP,PTPN2,PUS7,RELB,RRS1,SBNO2,SLAMF8,SNAI2,SOD2,SOX4,ST3GAL1,TLR2,TNFRSF9,TNFSF8,TRAF3IP2,UBASH3B,VEGFA
GO:BP	regulation of developmental process	GO:0050793	FALSE	1.49e-08	7.82723	2474	340	85	21128	ABCA1,ACVR1B,ADAM8,ARNTL,BCL6,BHLHE40,BMP2,C5AR1,CCDC71L,CCL2,CCL7,CCR1,CDC42EP4,CDKN1A,CEBPB,CEBPD,ERMN,ERRFI1,FAM20C,FGR,HGF,HIF1A,HIPK2,HK2,HMGA2,HMOX1,IGFBP3,IGFBP5,IL15RA,IL1RAP,IL1RL2,IL33,IL4R,IL6,IL8,ITGA5,ITGAX,ITGB3,JAK3,KLHL25,LAMB1,LDLR,LIF,LRP8,LRRC4C,MAFB,MEDAG,MMP14,MSR1,MYC,NFKBIA,NKX3-1,PDGFA,PDGFRA,PGF,PGK1,PIM1,PLEKHA4,PNP,PRRX1,PTPN2,PUS7,RGS2,RND1,RND3,SIX4,SLAMF8,SLC6A6,SLC7…
GO:BP	regulation of metabolic process	GO:0019222	FALSE	1.52e-08	7.81758	7386	340	180	21128	ACVR1B,ADAM8,ADORA3,AKR1C1,AKR1C3,APLN,ARNTL,ARNTL2,ARRDC3,ASS1,ATP1A1,BAZ1A,BCL3,BCL6,BEND3,BHLHE40,BIRC3,BMP2,C1QTNF1,C5AR1,CCL2,CCR1,CDK18,CDK2,CDKN1A,CEBPB,CEBPD,CHEK2,CKS2,CLEC5A,CXCL6,DDIT4,DIO2,DNAJB9,E2F3,EIF4EBP1,ELL2,ERN1,ERRFI1,ETS2,FAM20C,FCGR3A,FGR,FOSL1,FOSL2,GADD45B,GCH1,GLIS3,GNAI2,HGF,HIF1A,HILPDA,HIPK2,HK2,HMGA2,HMOX1,HSPA5,HSPA8,IER3,IGFBP3,IGFBP5,IKZF4,IL1R1,IL1R2,IL1RAP,IL1RL…
GO:BP	positive regulation of gene expression	GO:0010628	FALSE	1.59e-08	7.79743	1163	340	53	21128	ACVR1B,ADAM8,BCL3,BMP2,C1QTNF1,C5AR1,CEBPB,CLEC5A,DNAJB9,ERN1,FCGR3A,FGR,HGF,HIF1A,HILPDA,HMGA2,HMOX1,HSPA8,IL1R1,IL1RAP,IL1RL1,IL1RL2,IL33,IL4R,IL6,IL8,ITGA2,ITGAX,ITGB3,LAPTM5,LDLR,LIF,LPCAT3,MAPK13,MMP14,MPV17L2,MYC,NEAT1,NFIL3,NKX3-1,NOD2,ORM2,PLSCR1,PNP,SLC11A1,SLC7A5,SOX4,TLR2,TRAF3IP2,TSLP,VDR,VEGFA,YBX3
GO:BP	positive regulation of cell migration	GO:0030335	FALSE	1.98e-08	7.70341	530	340	34	21128	ACVR1B,ADAM8,BMP2,C5AR1,CCL20,CCL7,CCR1,FGR,GNAI2,HGF,HIF1A,HMOX1,HSPA5,ICAM1,IGFBP5,IL1R1,IL6,IL8,ITGA2,ITGA5,ITGAX,ITGB3,LAMB1,LAMC2,MAP4K4,MMP14,P2RY6,PDGFA,PDGFRA,PGF,SNAI2,SOD2,VEGFA,ZNF703
GO:BP	positive regulation of immune system process	GO:0002684	FALSE	1.99e-08	7.70114	1060	340	50	21128	ADAM8,BCL6,BIRC3,C1RL,C5AR1,CCL2,CCL20,CCL7,CCR1,CDKN1A,CFB,DNAJB9,FCGR3A,FGR,FPR1,HMOX1,ICAM1,IL15RA,IL1R1,IL1RL1,IL1RL2,IL33,IL4R,IL6,IL8,IRAK2,ITGA2,ITGB3,JAK3,KLHL25,LAPTM5,LIF,MMP14,NFKBIA,NLRP6,NOD2,PGF,PLSCR1,PNP,PTPN2,SH2B2,SLC11A1,SLC7A5,SOX4,TIFA,TLR2,TNFAIP3,TNIP2,TSLP,VEGFA
GO:BP	regulation of defense response	GO:0031347	FALSE	2.12e-08	7.67283	718	340	40	21128	ADAM8,ALOX5AP,BCL6,BIRC3,C2CD4A,CASP4,CEBPB,CXCL6,FGR,HGF,IER3,IL1R1,IL1RL1,IL1RL2,IL33,IL6,IRAK2,ITGA2,LDLR,LPCAT3,LRP8,MAPK13,MMP3,NEAT1,NFKBIA,NLRP6,NOD2,OSMR,PLSCR1,PTPN2,S100A9,SBNO2,SIGLEC10,SLAMF8,TIFA,TLR2,TNFAIP3,TNIP2,TRAF3IP2,TSLP
GO:BP	cellular response to lipid	GO:0071396	FALSE	2.87e-08	7.54159	598	340	36	21128	ABCA1,AKR1C1,AKR1C3,ARNTL,ASS1,ATP1A1,CCL2,CD68,CEBPB,CXCL1,CXCL3,CXCL5,CXCL6,DDIT4,ERRFI1,HSPA8,IL6,IL8,IRAK2,ITGA2,LDLR,LRP8,NFKBIA,NKX3-1,NOD2,P2RY6,PIM1,SBNO2,SLC7A5,SNAI2,SPP1,TLR2,TNFAIP3,TNIP2,VDR,ZNF703
GO:BP	negative regulation of response to stimulus	GO:0048585	FALSE	3.05e-08	7.51589	1611	340	64	21128	APCDD1L,APLN,ARNTL,ARRDC3,BCL3,BCL6,BMP2,C1QTNF1,CCL2,CHEK2,DDIT4,DNAJB9,ERRFI1,FGR,GNAI2,HGF,HIF1A,HIPK2,HMGA2,HMOX1,HSPA5,ICAM1,IER3,IGFBP3,IGFBP5,IL1R2,IL1RL1,IL33,IL4R,IL6,IL8,JAK3,LAPTM5,LDLR,LIF,LPCAT3,MMP14,MUC1,MVP,MYC,NFKBIA,NKX3-1,NLRP6,NOD2,PDGFA,PDGFRA,PLAUR,PTPN2,RFFL,RGS16,RGS2,SIGLEC10,SLAMF8,SNAI2,SOD2,SPP1,SPRED3,SPRY4,THBD,TLE2,TNFAIP3,TXN,UBASH3B,YBX3
GO:BP	vasculature development	GO:0001944	FALSE	4.73e-08	7.32468	737	340	40	21128	ADAM8,ANPEP,APLN,B4GALT1,C1GALT1,C5AR1,CCL2,ERRFI1,ESM1,FOSL1,HGF,HIF1A,HIPK2,HK2,HMGA2,HMOX1,IL6,IL8,ITGA5,ITGAX,ITGB3,LDLR,LIF,MMP14,MMP19,NKX3-1,NSDHL,PDGFA,PDGFRA,PGF,PGK1,PRRX1,SAT1,SHC1,SOD2,SOX4,THBS2,TMEM2,TNFAIP3,VEGFA
GO:BP	response to bacterium	GO:0009617	FALSE	5.1e-08	7.29276	772	340	41	21128	ABCA1,ASS1,BCL3,BMP2,C15ORF48,C5AR1,CASP4,CCL2,CCL20,CD68,CEBPB,CFB,CXCL1,CXCL3,CXCL5,CXCL6,DIO2,FGR,FKBP5,GCH1,IL6,IL8,IRAK2,NFKBIA,NLRP6,NOD2,PYGL,S100A9,SBNO2,SHC1,SLAMF8,SLC11A1,SLC7A5,SOD2,THBD,TLR2,TNFAIP3,TNFSF8,TNIP2,TREM1,TSLP
GO:BP	positive regulation of inflammatory response	GO:0050729	FALSE	5.48e-08	7.26115	145	340	18	21128	ADAM8,ALOX5AP,C2CD4A,CASP4,CEBPB,IL1RL1,IL33,IL6,ITGA2,LDLR,MAPK13,NEAT1,NFKBIA,NLRP6,OSMR,S100A9,TLR2,TSLP
GO:BP	positive regulation of cell motility	GO:2000147	FALSE	7.66e-08	7.11559	557	340	34	21128	ACVR1B,ADAM8,BMP2,C5AR1,CCL20,CCL7,CCR1,FGR,GNAI2,HGF,HIF1A,HMOX1,HSPA5,ICAM1,IGFBP5,IL1R1,IL6,IL8,ITGA2,ITGA5,ITGAX,ITGB3,LAMB1,LAMC2,MAP4K4,MMP14,P2RY6,PDGFA,PDGFRA,PGF,SNAI2,SOD2,VEGFA,ZNF703
GO:BP	cellular response to stress	GO:0033554	FALSE	8.25e-08	7.08343	1941	340	71	21128	ADAM8,AKR1C3,ALKBH2,ARNTL,ASS1,BCL2A1,BCL3,BCL6,BMP2,CASP4,CDK2,CDKN1A,CEBPB,CEBPD,CHEK2,DDIT4,DNAJB9,ERN1,ERRFI1,FOSL1,GADD45B,GCH1,HGF,HIF1A,HILPDA,HIPK2,HK2,HMGA2,HMOX1,HSPA5,HSPA8,IER3,IL6,IL8,KCNK3,KDM6B,LPCAT3,MAFB,MAP4K4,MAPK13,MMP3,MUC1,MYC,NDRG1,NEK6,NFKBIA,NKX3-1,NOD2,NUDT15,PDGFRA,PGK1,PLIN2,PRRX1,PTPN2,RELB,RFC2,SLC2A1,SLC7A11,SLC7A5,SLC9A1,SNAI2,SOD2,SOX4,SPP1,TFPI2,TNFAIP3,TRAF1,TXN…
GO:BP	epithelial cell proliferation	GO:0050673	FALSE	9.58e-08	7.01883	443	340	30	21128	APLN,B4GALT1,BMP2,C5AR1,CCL2,CEBPB,ERN1,ERRFI1,HGF,HIF1A,HMOX1,IGFBP3,IGFBP5,IL6,ITGB3,LAMB1,MMP14,MYC,NEAT1,NKX3-1,NME1,NOD2,PGF,SERPINB1,SIX4,SNAI2,TNFAIP3,VDR,VEGFA,ZNF703
GO:BP	developmental process	GO:0032502	FALSE	9.95e-08	7.00233	6446	340	161	21128	ABCA1,ACVR1B,ADAM8,ADAMTS3,AKR1C1,AKR1C3,ANPEP,APLN,ARNTL,ARRDC3,ASS1,B4GALT1,BCL3,BCL6,BHLHE40,BIRC3,BMP2,C1GALT1,C5AR1,CAPG,CCDC71L,CCL2,CCL7,CCR1,CD68,CDC42EP4,CDKN1A,CEBPB,CEBPD,CHSY1,CLEC5A,CLMP,CNTNAP1,CTSL,CXCL1,DDIT4,DIO2,DNAJB9,ERMN,ERRFI1,ESM1,ETS2,FAM20C,FGR,FOSL1,FOSL2,GADD45B,GPATCH4,HGF,HIF1A,HIPK2,HK2,HMGA2,HMOX1,HSPA5,ICAM1,IER3,IGFBP3,IGFBP5,IL15RA,IL1RAP,IL1RL2,IL33,IL4R,IL6,IL8…
GO:BP	leukocyte activation	GO:0045321	FALSE	9.97e-08	7.00112	999	340	47	21128	ADAM8,BCL3,BCL6,C5AR1,CCL2,CDKN1A,CEBPB,CTSL,CXCL6,DNAJB9,FCGR3A,FGR,HMOX1,ICAM1,IL15RA,IL1RL1,IL1RL2,IL33,IL4R,IL6,IL8,JAK3,KLHL25,LAPTM5,LDLR,MAFB,MMP14,MT1G,NDRG1,NFIL3,NOD2,PLSCR1,PNP,PTPN2,RELB,SBNO2,SLAMF8,SLC11A1,SOX4,ST3GAL1,TLR2,TNFAIP3,TNFRSF9,TNFSF8,TNIP2,TRAF3IP2,TSLP
GO:BP	acute inflammatory response	GO:0002526	FALSE	1.44e-07	6.84094	116	340	16	21128	ADAM8,ALOX5AP,ASS1,B4GALT1,C2CD4A,CD163,CEBPB,FCGR3A,IL6,NLRP6,ORM2,OSMR,PLSCR1,SERPINA1,SERPINA3,TREM1
GO:BP	response to hypoxia	GO:0001666	FALSE	1.49e-07	6.82677	289	340	24	21128	ADAM8,BMP2,DDIT4,HIF1A,HILPDA,HIPK2,HK2,HMOX1,ITGA2,KCNK3,MMP14,MYC,NDRG1,NKX3-1,PDGFA,PGF,PGK1,PLEKHN1,PLOD2,SLC2A1,SLC9A1,SOD2,TLR2,VEGFA
GO:BP	positive regulation of locomotion	GO:0040017	FALSE	1.57e-07	6.80526	572	340	34	21128	ACVR1B,ADAM8,BMP2,C5AR1,CCL20,CCL7,CCR1,FGR,GNAI2,HGF,HIF1A,HMOX1,HSPA5,ICAM1,IGFBP5,IL1R1,IL6,IL8,ITGA2,ITGA5,ITGAX,ITGB3,LAMB1,LAMC2,MAP4K4,MMP14,P2RY6,PDGFA,PDGFRA,PGF,SNAI2,SOD2,VEGFA,ZNF703
GO:BP	myeloid leukocyte migration	GO:0097529	FALSE	1.67e-07	6.77665	242	340	22	21128	ADAM8,B4GALT1,C5AR1,CCL2,CCL20,CCL7,CCR1,CXCL1,CXCL3,CXCL5,CXCL6,IL1R1,IL6,IL8,MMP14,MSMP,NOD2,PGF,S100A9,SLAMF8,TREM1,VEGFA
GO:BP	regulation of multicellular organismal development	GO:2000026	FALSE	1.95e-07	6.70888	1400	340	57	21128	ACVR1B,ADAM8,ARNTL,BCL6,BHLHE40,BMP2,C5AR1,CCR1,CEBPB,ERRFI1,FAM20C,HGF,HIF1A,HIPK2,HK2,HMGA2,HMOX1,IL15RA,IL1RAP,IL1RL2,IL33,IL4R,IL6,IL8,ITGA5,ITGAX,ITGB3,JAK3,KLHL25,LDLR,LIF,LRP8,MAFB,MMP14,MYC,NFKBIA,PGF,PGK1,PIM1,PNP,PTPN2,RGS2,SIX4,SLAMF8,SLC7A5,SNAI2,SOX4,SPP1,SPRED3,TGM2,THBS2,TLR2,TMEM2,TNFAIP3,UBASH3B,VDR,VEGFA
GO:BP	regulation of MAPK cascade	GO:0043408	FALSE	1.99e-07	6.70057	673	340	37	21128	ADAM8,BMP2,C1QTNF1,C5AR1,CCL2,CCL20,CCL7,CCR1,ERN1,ERRFI1,GADD45B,GNAI2,HGF,HIPK2,ICAM1,IGFBP3,IL6,ITGB3,LAPTM5,LIF,MAP4K4,MARCO,MYC,NLRP6,NOD2,P2RY6,PDGFA,PDGFRA,PIK3R5,PTPN2,RGS2,SHC1,SPRED3,SPRY4,TNFAIP8L3,TRAF1,VEGFA
GO:BP	response to lipid	GO:0033993	FALSE	2.09e-07	6.68054	913	340	44	21128	ABCA1,AKR1C1,AKR1C3,ARNTL,ASS1,ATP1A1,CCL2,CD68,CEBPB,CXCL1,CXCL3,CXCL5,CXCL6,DDIT4,DIO2,ERRFI1,FOSL1,GCH1,HSPA8,IL6,IL8,IRAK2,ITGA2,LDLR,LRP8,NFKBIA,NKX3-1,NOD2,P2RY6,PDGFA,PIM1,S100A9,SBNO2,SLC11A1,SLC7A5,SNAI2,SOD2,SPP1,THBD,TLR2,TNFAIP3,TNIP2,VDR,ZNF703
GO:BP	regulation of protein metabolic process	GO:0051246	FALSE	2.22e-07	6.6539	2560	340	84	21128	ADAM8,ARNTL,ARRDC3,BCL3,BCL6,BIRC3,BMP2,C5AR1,CDK2,CDKN1A,CHEK2,CKS2,DDIT4,DIO2,EIF4EBP1,ERN1,ERRFI1,FGR,GADD45B,GNAI2,HGF,HIF1A,HIPK2,HMGA2,HSPA5,IER3,IGFBP3,IGFBP5,IL1R2,IL33,IL6,ITGA2,ITGA5,ITGB3,JAK3,KLHL25,LAPTM5,LDLR,LIF,LPCAT3,LRP8,MARCO,MMP14,MPV17L2,MUC1,MVP,MYC,NFKBIA,NKX3-1,NLRP6,NNMT,NOD2,NUDT15,PDGFA,PGF,PI15,PIK3R5,PLAUR,PLEKHN1,PTPN2,PTX3,PUS7,RFFL,RGS2,S100A9,SERPINA1,SERPINA3,SER…
GO:BP	response to molecule of bacterial origin	GO:0002237	FALSE	2.28e-07	6.64287	347	340	26	21128	ABCA1,ASS1,C5AR1,CCL2,CD68,CEBPB,CXCL1,CXCL3,CXCL5,CXCL6,DIO2,GCH1,IL6,IL8,IRAK2,NFKBIA,NOD2,S100A9,SBNO2,SLC11A1,SLC7A5,SOD2,THBD,TLR2,TNFAIP3,TNIP2
GO:BP	negative regulation of multicellular organismal process	GO:0051241	FALSE	2.87e-07	6.5427	1105	340	49	21128	ARNTL,ARRDC3,ATP1A1,BCL3,BCL6,BMP2,C1QTNF1,CCR1,CEBPB,CHSY1,ERRFI1,FGR,GNAI2,HGF,HIF1A,HMOX1,IGFBP5,IL1R2,IL1RL1,IL33,IL4R,IL6,JAK3,LAPTM5,LDLR,MAFB,MYC,NKX3-1,NLRP6,NOD2,PDGFA,PDGFRA,PGK1,PLAUR,PTPN2,RELB,RGS2,SERPINB1,SLAMF8,SLC11A1,SNAI2,SPP1,SPRED3,THBD,THBS2,TIMP1,TLR2,TNFAIP3,UBASH3B
GO:BP	anatomical structure development	GO:0048856	FALSE	2.89e-07	6.53886	5861	340	149	21128	ACVR1B,ADAM8,ADAMTS3,AKR1C1,AKR1C3,ANPEP,APLN,ARNTL,ARRDC3,ASS1,B4GALT1,BCL3,BCL6,BHLHE40,BMP2,C1GALT1,C5AR1,CAPG,CCL2,CCL7,CCR1,CDC42EP4,CDKN1A,CEBPB,CEBPD,CHSY1,CLEC5A,CLMP,CNTNAP1,CTSL,CXCL1,DDIT4,DNAJB9,ERMN,ERRFI1,ESM1,ETS2,FAM20C,FGR,FOSL1,FOSL2,GPATCH4,HGF,HIF1A,HIPK2,HK2,HMGA2,HMOX1,HSPA5,ICAM1,IER3,IGFBP3,IGFBP5,IL15RA,IL1RAP,IL1RL2,IL33,IL4R,IL6,IL8,ITGA2,ITGA5,ITGAX,ITGB3,JAK3,KCNK3,KD…
GO:BP	regulation of cellular metabolic process	GO:0031323	FALSE	3.33e-07	6.4773	5653	340	145	21128	ACVR1B,ADAM8,ADORA3,AKR1C1,AKR1C3,APLN,ARNTL,ARNTL2,ASS1,ATP1A1,BAZ1A,BCL3,BCL6,BEND3,BHLHE40,BMP2,C1QTNF1,C5AR1,CDK18,CDK2,CDKN1A,CEBPB,CEBPD,CHEK2,CKS2,DDIT4,DIO2,E2F3,EIF4EBP1,ELL2,ERN1,ERRFI1,ETS2,FAM20C,FGR,FOSL1,FOSL2,GADD45B,GCH1,GLIS3,GNAI2,HGF,HIF1A,HIPK2,HK2,HMGA2,HMOX1,HSPA5,HSPA8,IER3,IGFBP3,IGFBP5,IKZF4,IL1RAP,IL33,IL6,IL8,IRAK2,ITGA2,ITGA5,ITGB3,JAK3,KDM6B,KLF17,KLHL25,LAPTM5,LDLR,L…
GO:BP	positive regulation of cellular metabolic process	GO:0031325	FALSE	3.49e-07	6.45705	3097	340	95	21128	ADAM8,AKR1C1,AKR1C3,APLN,ARNTL,ARNTL2,ASS1,BAZ1A,BCL3,BEND3,BMP2,CDK2,CDKN1A,CEBPB,CEBPD,CHEK2,CKS2,E2F3,ELL2,ERN1,ETS2,FGR,FOSL1,FOSL2,GLIS3,GNAI2,HGF,HIF1A,HIPK2,HMGA2,HMOX1,HSPA5,HSPA8,IKZF4,IL33,IL6,IL8,ITGA2,ITGA5,ITGB3,KDM6B,KLHL25,LAPTM5,LDLR,LIF,LRP8,MAFB,MARCO,MID1IP1,MLLT11,MPV17L2,MUC1,MYC,NAMPT,NFIL3,NFKBIA,NKX3-1,NNMT,NOD2,P2RY6,PDGFA,PDGFRA,PGF,PIK3R5,PIM1,PLAUR,PLEKHN1,PLSCR1,PRRX1…
GO:BP	cell migration	GO:0016477	FALSE	3.52e-07	6.45313	1502	340	59	21128	ACVR1B,ADAM8,ADORA3,ARPC5L,B4GALT1,BMP2,C5AR1,CCL2,CCL20,CCL7,CCR1,CXCL1,CXCL3,CXCL5,CXCL6,DDIT4,FGR,GNAI2,HGF,HIF1A,HMOX1,HSPA5,ICAM1,IGFBP3,IGFBP5,IL1R1,IL33,IL6,IL8,ITGA2,ITGA5,ITGAX,ITGB3,LAMB1,LAMC2,LRP8,MAP4K4,MMP14,MSMP,NAV1,NOD2,P2RY6,PDGFA,PDGFRA,PGF,RFFL,RND1,RND3,S100A9,SIX4,SLAMF8,SLC9A1,SNAI2,SOD2,TIMP1,TNFAIP3,TREM1,VEGFA,ZNF703
GO:BP	negative regulation of cell death	GO:0060548	FALSE	3.58e-07	6.44598	1001	340	46	21128	ADAM8,BCL2A1,BCL3,BCL6,BIRC3,CCL2,CEBPB,CLEC5A,GNAI2,HGF,HIF1A,HIPK2,HMGA2,HMOX1,HSPA5,ICAM1,IER3,IL6,ITGA5,ITGB3,JAK3,LAPTM5,MAP4K4,MUC1,MYC,NOD2,PIM1,PLAUR,RFFL,SHC1,SIX4,SLC7A11,SLC7A5,SLC9A1,SNAI2,SOD2,SOX4,ST3GAL1,TIMP1,TNFAIP3,TNFRSF10D,TNIP2,TSLP,TXN,VEGFA,YBX3
GO:BP	response to lipopolysaccharide	GO:0032496	FALSE	3.69e-07	6.43298	328	340	25	21128	ABCA1,ASS1,CCL2,CD68,CEBPB,CXCL1,CXCL3,CXCL5,CXCL6,DIO2,GCH1,IL6,IL8,IRAK2,NFKBIA,NOD2,S100A9,SBNO2,SLC11A1,SLC7A5,SOD2,THBD,TLR2,TNFAIP3,TNIP2
GO:BP	response to decreased oxygen levels	GO:0036293	FALSE	3.7e-07	6.43143	302	340	24	21128	ADAM8,BMP2,DDIT4,HIF1A,HILPDA,HIPK2,HK2,HMOX1,ITGA2,KCNK3,MMP14,MYC,NDRG1,NKX3-1,PDGFA,PGF,PGK1,PLEKHN1,PLOD2,SLC2A1,SLC9A1,SOD2,TLR2,VEGFA
GO:BP	regulation of primary metabolic process	GO:0080090	FALSE	3.82e-07	6.41737	5882	340	149	21128	ACVR1B,ADAM8,ADORA3,AKR1C3,APLN,ARNTL,ARNTL2,ARRDC3,ATP1A1,BAZ1A,BCL3,BCL6,BEND3,BHLHE40,BIRC3,BMP2,C1QTNF1,C5AR1,CDK18,CDK2,CDKN1A,CEBPB,CEBPD,CHEK2,CKS2,DDIT4,DIO2,E2F3,EIF4EBP1,ELL2,ERN1,ERRFI1,ETS2,FGR,FOSL1,FOSL2,GADD45B,GLIS3,GNAI2,HGF,HIF1A,HIPK2,HMGA2,HMOX1,HSPA5,HSPA8,IER3,IGFBP3,IGFBP5,IKZF4,IL1R2,IL1RAP,IL33,IL6,IL8,IRAK2,ITGA2,ITGA5,ITGB3,JAK3,KDM6B,KLF17,KLHL25,LAPTM5,LDLR,LIF,LPCAT3…
GO:BP	circulatory system development	GO:0072359	FALSE	4.28e-07	6.36846	1118	340	49	21128	ADAM8,ANPEP,APLN,B4GALT1,BMP2,C1GALT1,C5AR1,CCL2,CDKN1A,ERRFI1,ESM1,FOSL1,HGF,HIF1A,HIPK2,HK2,HMGA2,HMOX1,IL6,IL8,ITGA5,ITGAX,ITGB3,KDM6B,LDLR,LIF,MMP14,MMP19,NKX3-1,NPY2R,NSDHL,PDGFA,PDGFRA,PGF,PGK1,PIM1,PRRX1,RGS2,SAT1,SHC1,SLC9A1,SNAI2,SOD2,SOX4,THBS2,TMEM2,TNFAIP3,TRAF3IP2,VEGFA
GO:BP	response to oxygen levels	GO:0070482	FALSE	4.47e-07	6.34929	331	340	25	21128	ADAM8,BMP2,DDIT4,HIF1A,HILPDA,HIPK2,HK2,HMOX1,ITGA2,KCNK3,MMP14,MYC,NDRG1,NKX3-1,PDGFA,PGF,PGK1,PLEKHN1,PLOD2,SLC2A1,SLC7A5,SLC9A1,SOD2,TLR2,VEGFA
GO:BP	locomotion	GO:0040011	FALSE	4.71e-07	6.32677	1353	340	55	21128	ACVR1B,ADAM8,ADORA3,ARRDC3,BMP2,C5AR1,CCL2,CCL20,CCL7,CCR1,CXCL1,CXCL3,CXCL5,CXCL6,FGR,FOSL1,FPR1,GNAI2,HGF,HIF1A,HMOX1,HSPA5,ICAM1,IGFBP3,IGFBP5,IL1R1,IL33,IL6,IL8,ITGA2,ITGA5,ITGAX,ITGB3,LAMB1,LAMC2,MAP4K4,MMP14,MSMP,NOD2,P2RY6,PDGFA,PDGFRA,PGF,PLAUR,PTPN2,RFFL,S100A9,SLAMF8,SNAI2,SOD2,TIMP1,TREM1,TUBB3,VEGFA,ZNF703
GO:BP	leukocyte differentiation	GO:0002521	FALSE	5.33e-07	6.27357	599	340	34	21128	ADAM8,BCL3,BCL6,BMP2,CCR1,CEBPB,CTSL,DNAJB9,FAM20C,IL15RA,IL1RL2,IL4R,IL6,JAK3,KLHL25,LIF,MAFB,MMP14,MT1G,MYC,NFIL3,PNP,PTPN2,RELB,SBNO2,SLAMF8,SOX4,ST3GAL1,TLR2,TNFRSF9,TNFSF8,TRAF3IP2,UBASH3B,VEGFA
GO:BP	myeloid leukocyte activation	GO:0002274	FALSE	6.82e-07	6.16645	236	340	21	21128	C5AR1,CXCL6,FCGR3A,FGR,HMOX1,IL1RL1,IL33,IL4R,IL6,IL8,LDLR,MT1G,NDRG1,PLSCR1,RELB,SBNO2,SLC11A1,TLR2,TNIP2,TRAF3IP2,TSLP
GO:BP	MAPK cascade	GO:0000165	FALSE	7.35e-07	6.13355	773	340	39	21128	ADAM8,BMP2,C1QTNF1,C5AR1,CCL2,CCL20,CCL7,CCR1,ERN1,ERRFI1,GADD45B,GNAI2,HGF,HIPK2,ICAM1,IGFBP3,IL6,ITGB3,LAPTM5,LIF,MAP4K4,MAPK13,MARCO,MYC,NLRP6,NOD2,P2RY6,PDGFA,PDGFRA,PIK3R5,PTPN2,RGS2,SHC1,SPRED3,SPRY4,TNFAIP8L3,TRAF1,VEGFA,ZDHHC9
GO:BP	blood vessel development	GO:0001568	FALSE	7.64e-07	6.11688	706	340	37	21128	ADAM8,ANPEP,APLN,B4GALT1,C1GALT1,C5AR1,CCL2,ESM1,FOSL1,HGF,HIF1A,HIPK2,HK2,HMGA2,HMOX1,IL6,IL8,ITGA5,ITGAX,ITGB3,LDLR,MMP14,MMP19,NKX3-1,NSDHL,PDGFA,PDGFRA,PGF,PGK1,PRRX1,SAT1,SHC1,SOX4,THBS2,TMEM2,TNFAIP3,VEGFA
GO:BP	cytokine production	GO:0001816	FALSE	7.7e-07	6.11358	740	340	38	21128	ADAM8,ADAMTS3,BCL3,BCL6,C5AR1,CEBPB,CLEC5A,CXCL6,ERRFI1,FCGR3A,FGR,HGF,HIF1A,HILPDA,HMOX1,IL1R1,IL1R2,IL1RAP,IL1RL1,IL1RL2,IL33,IL4R,IL6,JAK3,LAPTM5,MAPK13,NLRP6,NOD2,ORM2,PNP,RELB,SERPINB1,SLC11A1,SLC7A5,SNAI2,TLR2,TNFAIP3,TSLP
GO:BP	response to abiotic stimulus	GO:0009628	FALSE	8.56e-07	6.06761	1141	340	49	21128	ADAM8,BCL3,BEST1,BHLHE40,BMP2,CDKN1A,CHEK2,DDIT4,DIO2,ERRFI1,FOSL1,HIF1A,HILPDA,HIPK2,HK2,HMOX1,HSPA5,IL33,ITGA2,ITGB3,KCNK3,MAPK13,MMP1,MMP14,MMP3,MYC,NDRG1,NFKBIA,NKX3-1,PDGFA,PGF,PGK1,PLEKHN1,PLOD2,RELB,SLC1A3,SLC2A1,SLC7A11,SLC7A5,SLC9A1,SNAI2,SOD2,STX1A,THBD,TIMP1,TLR2,TXN,VEGFA,YBX3
GO:BP	leukocyte migration	GO:0050900	FALSE	9.63e-07	6.0163	399	340	27	21128	ADAM8,B4GALT1,C5AR1,CCL2,CCL20,CCL7,CCR1,CXCL1,CXCL3,CXCL5,CXCL6,HMOX1,ICAM1,IL1R1,IL33,IL6,IL8,ITGA2,ITGB3,MMP14,MSMP,NOD2,PGF,S100A9,SLAMF8,TREM1,VEGFA
GO:BP	blood vessel morphogenesis	GO:0048514	FALSE	1.20584e-06	5.91871	618	340	34	21128	ADAM8,ANPEP,APLN,B4GALT1,C1GALT1,C5AR1,CCL2,ESM1,HGF,HIF1A,HIPK2,HK2,HMGA2,HMOX1,IL6,IL8,ITGA5,ITGAX,ITGB3,LDLR,MMP14,MMP19,PDGFA,PDGFRA,PGF,PGK1,PRRX1,SAT1,SHC1,SOX4,THBS2,TMEM2,TNFAIP3,VEGFA
GO:BP	positive regulation of developmental process	GO:0051094	FALSE	1.29384e-06	5.88812	1311	340	53	21128	ACVR1B,ADAM8,ARNTL,BCL6,BMP2,C5AR1,CCDC71L,CCR1,CEBPB,CEBPD,FAM20C,HGF,HIF1A,HIPK2,HK2,HMGA2,HMOX1,IGFBP3,IL15RA,IL1RAP,IL1RL2,IL33,IL4R,IL6,IL8,ITGA5,ITGAX,ITGB3,KLHL25,LAMB1,LIF,LRP8,MEDAG,MMP14,MSR1,MYC,PGF,PIM1,PNP,SIX4,SLC6A6,SLC7A5,SNAI2,SOD2,SOX4,TEAD4,TGM2,THBS2,TLR2,VDR,VEGFA,YBX3,ZNF703
GO:BP	tube development	GO:0035295	FALSE	1.29573e-06	5.88748	1079	340	47	21128	ADAM8,ANPEP,APLN,ASS1,B4GALT1,BMP2,C1GALT1,C5AR1,CCL2,CLMP,ERRFI1,ESM1,HGF,HIF1A,HIPK2,HK2,HMGA2,HMOX1,IGFBP5,IL6,IL8,ITGA5,ITGAX,ITGB3,LDLR,LIF,MMP14,MMP19,MYC,NKX3-1,PDGFA,PDGFRA,PGF,PGK1,PRRX1,SAT1,SHC1,SIX4,SLC7A11,SOX4,ST14,TGM2,THBS2,TMEM2,TNFAIP3,VDR,VEGFA
GO:BP	organonitrogen compound metabolic process	GO:1901564	FALSE	1.35891e-06	5.86681	6538	340	159	21128	A4GALT,ABCA1,ACVR1B,ADAM8,ADAMTS3,ADK,ANPEP,ARNTL,ARRDC3,ASS1,B4GALT1,BCAT1,BCL3,BCL6,BEND3,BIRC3,BMP2,C1GALT1,C1RL,C5AR1,CASP4,CCL2,CDK18,CDK2,CDKN1A,CFB,CHEK2,CHST1,CHSY1,CKS2,CTSL,DDIT4,DIO2,DNAJB9,EIF4EBP1,ERN1,ERRFI1,FAM20C,FGR,FKBP5,GADD45B,GCH1,GLRX,GNAI2,HGF,HIF1A,HIPK2,HK2,HMGA2,HMOX1,HSPA5,HSPA8,IER3,IGFBP3,IGFBP5,IL1R2,IL33,IL6,IRAK2,ITGA2,ITGA5,ITGB3,JAK3,KDM6B,KLHL25,LAPTM5,LDLR,LIF,…
GO:BP	angiogenesis	GO:0001525	FALSE	1.54679e-06	5.81057	528	340	31	21128	ADAM8,ANPEP,APLN,B4GALT1,C1GALT1,C5AR1,CCL2,ESM1,HGF,HIF1A,HIPK2,HK2,HMGA2,HMOX1,IL6,IL8,ITGA5,ITGAX,ITGB3,MMP14,MMP19,PDGFA,PDGFRA,PGF,PGK1,SAT1,SHC1,THBS2,TMEM2,TNFAIP3,VEGFA
GO:BP	negative regulation of programmed cell death	GO:0043069	FALSE	1.55323e-06	5.80876	900	340	42	21128	ADAM8,BCL2A1,BCL3,BCL6,BIRC3,CCL2,CEBPB,CLEC5A,GNAI2,HGF,HIF1A,HIPK2,HMGA2,HMOX1,HSPA5,ICAM1,IER3,IL6,ITGA5,JAK3,LAPTM5,MAP4K4,MUC1,MYC,NOD2,PIM1,PLAUR,RFFL,SHC1,SIX4,SLC7A5,SLC9A1,SNAI2,SOD2,ST3GAL1,TIMP1,TNFAIP3,TNFRSF10D,TNIP2,TSLP,VEGFA,YBX3
GO:BP	tube morphogenesis	GO:0035239	FALSE	1.60304e-06	5.79506	865	340	41	21128	ADAM8,ANPEP,APLN,B4GALT1,BMP2,C1GALT1,C5AR1,CCL2,ESM1,HGF,HIF1A,HIPK2,HK2,HMGA2,HMOX1,IL6,IL8,ITGA5,ITGAX,ITGB3,LDLR,MMP14,MMP19,MYC,NKX3-1,PDGFA,PDGFRA,PGF,PGK1,PRRX1,SAT1,SHC1,SIX4,SOX4,ST14,TGM2,THBS2,TMEM2,TNFAIP3,VDR,VEGFA
GO:BP	ERK1 and ERK2 cascade	GO:0070371	FALSE	1.65125e-06	5.78219	325	340	24	21128	BMP2,C5AR1,CCL2,CCL20,CCL7,CCR1,ERRFI1,GNAI2,ICAM1,ITGB3,LIF,MARCO,MYC,NLRP6,NOD2,P2RY6,PDGFA,PDGFRA,PTPN2,SHC1,SPRED3,SPRY4,TNFAIP8L3,VEGFA
GO:BP	positive regulation of response to external stimulus	GO:0032103	FALSE	1.80732e-06	5.74297	563	340	32	21128	ADAM8,ALOX5AP,BIRC3,C2CD4A,C5AR1,CASP4,CCL7,CCR1,CEBPB,IL1RL1,IL33,IL6,IL8,IRAK2,ITGA2,LDLR,MAPK13,NEAT1,NFKBIA,NLRP6,NOD2,OSMR,PGF,PLSCR1,S100A9,THBD,TIFA,TLR2,TNFAIP3,TNIP2,TSLP,VEGFA
GO:BP	regulation of ERK1 and ERK2 cascade	GO:0070372	FALSE	1.9511e-06	5.70972	301	340	23	21128	BMP2,C5AR1,CCL2,CCL20,CCL7,CCR1,ERRFI1,GNAI2,ICAM1,ITGB3,LIF,MARCO,NLRP6,NOD2,P2RY6,PDGFA,PDGFRA,PTPN2,SHC1,SPRED3,SPRY4,TNFAIP8L3,VEGFA
GO:BP	regulation of cytokine production	GO:0001817	FALSE	2.23373e-06	5.65097	734	340	37	21128	ADAM8,BCL3,BCL6,C5AR1,CEBPB,CLEC5A,CXCL6,ERRFI1,FCGR3A,FGR,HGF,HIF1A,HILPDA,HMOX1,IL1R1,IL1R2,IL1RAP,IL1RL1,IL1RL2,IL33,IL4R,IL6,JAK3,LAPTM5,MAPK13,NLRP6,NOD2,ORM2,PNP,RELB,SERPINB1,SLC11A1,SLC7A5,SNAI2,TLR2,TNFAIP3,TSLP
GO:BP	negative regulation of apoptotic process	GO:0043066	FALSE	2.74938e-06	5.56076	881	340	41	21128	ADAM8,BCL2A1,BCL3,BCL6,BIRC3,CCL2,CEBPB,CLEC5A,GNAI2,HGF,HIF1A,HIPK2,HMGA2,HMOX1,HSPA5,ICAM1,IER3,IL6,ITGA5,JAK3,MAP4K4,MUC1,MYC,NOD2,PIM1,PLAUR,RFFL,SHC1,SIX4,SLC7A5,SLC9A1,SNAI2,SOD2,ST3GAL1,TIMP1,TNFAIP3,TNFRSF10D,TNIP2,TSLP,VEGFA,YBX3
GO:BP	cellular response to lipopolysaccharide	GO:0071222	FALSE	3.4263e-06	5.46517	209	340	19	21128	ABCA1,ASS1,CCL2,CD68,CEBPB,CXCL1,CXCL3,CXCL5,CXCL6,IL6,IL8,IRAK2,NFKBIA,NOD2,SBNO2,SLC7A5,TLR2,TNFAIP3,TNIP2
GO:BP	cell differentiation	GO:0030154	FALSE	3.57612e-06	5.44659	4287	340	116	21128	ABCA1,ACVR1B,ADAM8,AKR1C1,AKR1C3,ANPEP,ARNTL,B4GALT1,BCL3,BCL6,BHLHE40,BMP2,C1GALT1,C5AR1,CCDC71L,CCL2,CCR1,CEBPB,CEBPD,CHSY1,CLEC5A,CNTNAP1,CTSL,DDIT4,DIO2,DNAJB9,ERRFI1,ETS2,FAM20C,FGR,FOSL2,GADD45B,GPATCH4,HGF,HIF1A,HIPK2,HMGA2,HSPA5,ICAM1,IGFBP3,IGFBP5,IL15RA,IL1RL2,IL33,IL4R,IL6,ITGA2,ITGA5,ITGB3,JAK3,KDM6B,KLHL25,LAMB1,LAMC2,LDLR,LIF,LRP8,LRRC4C,MAFB,MAP4K4,MEDAG,MMP14,MMP19,MSR1,MT1G,MYC,N…
GO:BP	positive regulation of MAPK cascade	GO:0043410	FALSE	3.57616e-06	5.44658	484	340	29	21128	ADAM8,BMP2,C1QTNF1,C5AR1,CCL2,CCL20,CCL7,CCR1,ERN1,GADD45B,GNAI2,HGF,HIPK2,ICAM1,IGFBP3,IL6,ITGB3,LAPTM5,LIF,MARCO,NOD2,P2RY6,PDGFA,PDGFRA,PIK3R5,SHC1,TNFAIP8L3,TRAF1,VEGFA
GO:BP	regulation of cell migration	GO:0030334	FALSE	3.6371e-06	5.43924	926	340	42	21128	ACVR1B,ADAM8,ADORA3,BMP2,C5AR1,CCL2,CCL20,CCL7,CCR1,FGR,GNAI2,HGF,HIF1A,HMOX1,HSPA5,ICAM1,IGFBP3,IGFBP5,IL1R1,IL33,IL6,IL8,ITGA2,ITGA5,ITGAX,ITGB3,LAMB1,LAMC2,MAP4K4,MMP14,NOD2,P2RY6,PDGFA,PDGFRA,PGF,RFFL,SLAMF8,SNAI2,SOD2,TIMP1,VEGFA,ZNF703
GO:BP	regulation of macromolecule metabolic process	GO:0060255	FALSE	3.83436e-06	5.41631	6851	340	163	21128	ACVR1B,ADAM8,ADORA3,APLN,ARNTL,ARNTL2,ARRDC3,BAZ1A,BCL3,BCL6,BEND3,BHLHE40,BIRC3,BMP2,C1QTNF1,C5AR1,CCL2,CCR1,CDK18,CDK2,CDKN1A,CEBPB,CEBPD,CHEK2,CKS2,CLEC5A,CXCL6,DDIT4,DIO2,DNAJB9,E2F3,EIF4EBP1,ELL2,ERN1,ERRFI1,ETS2,FCGR3A,FGR,FOSL1,FOSL2,GADD45B,GLIS3,GNAI2,HGF,HIF1A,HILPDA,HIPK2,HMGA2,HMOX1,HSPA5,HSPA8,IER3,IGFBP3,IGFBP5,IKZF4,IL1R1,IL1R2,IL1RAP,IL1RL1,IL1RL2,IL33,IL4R,IL6,IL8,IRAK2,ITGA2,ITG…
GO:BP	cellular response to interleukin-1	GO:0071347	FALSE	4.16384e-06	5.38051	106	340	14	21128	CCL2,CCL20,CCL7,CEBPB,HIF1A,IL1R1,IL1R2,IL1RL2,IL6,IL8,IRAK2,MAPK13,NKX3-1,TNIP2
GO:BP	positive regulation of biosynthetic process	GO:0009891	FALSE	4.1841e-06	5.3784	2077	340	70	21128	APLN,ARNTL,ARNTL2,ASS1,BCL3,BMP2,CCL2,CDK2,CEBPB,CEBPD,CHEK2,E2F3,ELL2,ETS2,FOSL1,FOSL2,GLIS3,HGF,HIF1A,HIPK2,HMGA2,HSPA5,IKZF4,IL33,IL6,IL8,ITGA2,JAK3,KDM6B,LDLR,LIF,MAFB,MID1IP1,MLLT11,MPV17L2,MUC1,MYC,NAMPT,NFIL3,NFKBIA,NKX3-1,NNMT,NOD2,P2RY6,PIM1,PLSCR1,PRRX1,PTPN2,PTX3,RELB,RFC2,SBNO2,SEC14L2,SHC1,SIX4,SLC11A1,SLC6A9,SLC9A1,SOD2,SOX4,SPP1,TEAD4,TET3,TLR2,TNFSF8,TNIP2,VDR,VEGFA,YBX3,ZNF395
GO:BP	positive regulation of nitrogen compound metabolic process	GO:0051173	FALSE	4.7631e-06	5.32211	3154	340	93	21128	ADAM8,APLN,ARNTL,ARNTL2,ARRDC3,ASS1,BAZ1A,BCL3,BCL6,BEND3,BIRC3,BMP2,CDK2,CDKN1A,CEBPB,CEBPD,CHEK2,CKS2,E2F3,ELL2,ERN1,ETS2,FOSL1,FOSL2,GLIS3,HGF,HIF1A,HIPK2,HMGA2,HSPA5,HSPA8,IER3,IKZF4,IL33,IL6,ITGA2,ITGA5,ITGB3,KDM6B,LAPTM5,LDLR,LIF,LPCAT3,LRP8,MAFB,MARCO,MLLT11,MMP14,MPV17L2,MUC1,MYC,NAMPT,NFIL3,NFKBIA,NKX3-1,NLRP6,NNMT,NOD2,PDGFA,PGF,PIK3R5,PIM1,PLAUR,PLEKHN1,PLSCR1,PRRX1,PTX3,RELB,RFC2,S100…
GO:BP	regulation of molecular function	GO:0065009	FALSE	4.89536e-06	5.31022	3059	340	91	21128	ADAM8,ADORA3,ALOX5AP,ARRDC3,BCL3,BCL6,BHLHE40,BIRC3,BMP2,C5AR1,CCL2,CCL20,CCL7,CDKN1A,CKS2,CXCL1,ERN1,ERRFI1,FGR,FOSL1,GADD45B,GCH1,GLRX,GNAI2,HGF,HIF1A,HIPK2,HMGA2,HMOX1,IGFBP3,IL1RAP,IL6,IRAK2,ITGA2,ITGB3,KCNK3,LAPTM5,LIF,LRP8,MAP4K4,MID1IP1,MIDN,MVP,MYC,NETO2,NFKBIA,NKX3-1,NLRP6,NME1,NOD2,P2RY6,PDGFA,PDGFRA,PI15,PIK3R5,PIM1,PLAUR,PLSCR1,PTPN2,PTX3,RASGEF1B,RFC2,RFFL,RGPD2,RGS16,RGS2,RIPK4,S100…
GO:BP	cellular developmental process	GO:0048869	FALSE	5.10206e-06	5.29225	4312	340	116	21128	ABCA1,ACVR1B,ADAM8,AKR1C1,AKR1C3,ANPEP,ARNTL,B4GALT1,BCL3,BCL6,BHLHE40,BMP2,C1GALT1,C5AR1,CCDC71L,CCL2,CCR1,CEBPB,CEBPD,CHSY1,CLEC5A,CNTNAP1,CTSL,DDIT4,DIO2,DNAJB9,ERRFI1,ETS2,FAM20C,FGR,FOSL2,GADD45B,GPATCH4,HGF,HIF1A,HIPK2,HMGA2,HSPA5,ICAM1,IGFBP3,IGFBP5,IL15RA,IL1RL2,IL33,IL4R,IL6,ITGA2,ITGA5,ITGB3,JAK3,KDM6B,KLHL25,LAMB1,LAMC2,LDLR,LIF,LRP8,LRRC4C,MAFB,MAP4K4,MEDAG,MMP14,MMP19,MSR1,MT1G,MYC,N…
GO:BP	phosphorylation	GO:0016310	FALSE	5.67082e-06	5.24635	1872	340	65	21128	ACVR1B,ADAM8,ADK,BMP2,C5AR1,CCL2,CDK18,CDK2,CDKN1A,CHEK2,CKS2,DDIT4,ERN1,ERRFI1,FAM20C,FGR,GADD45B,GK,HGF,HIF1A,HIPK2,HK2,HMGA2,IER3,IGFBP3,IL6,IRAK2,ITGA5,ITGB3,ITPKC,JAK3,LIF,LRP8,MAP4K4,MAPK13,MARCO,MIDN,MLKL,MVP,NEK6,NKX3-1,NME1,NOD2,PDGFA,PDGFRA,PGF,PGK1,PIK3R5,PIM1,PLAUR,PTPN2,RGS2,RIPK4,SHC1,SLAMF8,SLC11A1,SPRY4,ST3GAL1,TLR2,TNFAIP3,TNFAIP8L3,TSLP,TXN,UBASH3B,VEGFA
GO:BP	anatomical structure morphogenesis	GO:0009653	FALSE	6.75885e-06	5.17013	2697	340	83	21128	ADAM8,ANPEP,APLN,B4GALT1,BCL3,BCL6,BMP2,C1GALT1,C5AR1,CCL2,CCL7,CDC42EP4,CEBPB,CHSY1,CNTNAP1,ERMN,ERRFI1,ESM1,ETS2,FAM20C,FGR,HGF,HIF1A,HIPK2,HK2,HMGA2,HMOX1,HSPA5,IER3,IGFBP5,IL4R,IL6,IL8,ITGA2,ITGA5,ITGAX,ITGB3,KDM6B,LAMB1,LAMC2,LDLR,LIF,LRP8,LRRC4C,MAFB,MAP4K4,MFAP2,MMP14,MMP19,MYC,NKX3-1,NPY2R,PDGFA,PDGFRA,PGF,PGK1,PIM1,PLEKHA4,PRRX1,RIPK4,RND1,RND3,SAT1,SBNO2,SHC1,SIX4,SLC1A3,SLC7A5,SNAI2,SO…
GO:BP	cellular response to molecule of bacterial origin	GO:0071219	FALSE	6.94048e-06	5.15861	218	340	19	21128	ABCA1,ASS1,CCL2,CD68,CEBPB,CXCL1,CXCL3,CXCL5,CXCL6,IL6,IL8,IRAK2,NFKBIA,NOD2,SBNO2,SLC7A5,TLR2,TNFAIP3,TNIP2
GO:BP	regulation of nitrogen compound metabolic process	GO:0051171	FALSE	7.02631e-06	5.15327	5724	340	142	21128	ACVR1B,ADAM8,ADORA3,APLN,ARNTL,ARNTL2,ARRDC3,ASS1,BAZ1A,BCL3,BCL6,BEND3,BHLHE40,BIRC3,BMP2,C5AR1,CDK18,CDK2,CDKN1A,CEBPB,CEBPD,CHEK2,CKS2,DDIT4,DIO2,E2F3,EIF4EBP1,ELL2,ERN1,ERRFI1,ETS2,FGR,FOSL1,FOSL2,GADD45B,GLIS3,GNAI2,HGF,HIF1A,HIPK2,HMGA2,HMOX1,HSPA5,HSPA8,IER3,IGFBP3,IGFBP5,IKZF4,IL1R2,IL1RAP,IL33,IL6,IL8,IRAK2,ITGA2,ITGA5,ITGB3,JAK3,KDM6B,KLF17,KLHL25,LAPTM5,LDLR,LIF,LPCAT3,LRP8,MAFB,MARCO,…
GO:BP	neutrophil migration	GO:1990266	FALSE	8.17715e-06	5.0874	131	340	15	21128	ADAM8,C5AR1,CCL2,CCL20,CCL7,CXCL1,CXCL3,CXCL5,CXCL6,IL1R1,IL8,NOD2,S100A9,SLAMF8,TREM1
GO:BP	cellular response to biotic stimulus	GO:0071216	FALSE	8.82948e-06	5.05406	246	340	20	21128	ABCA1,ASS1,CCL2,CD68,CEBPB,CXCL1,CXCL3,CXCL5,CXCL6,HSPA5,IL6,IL8,IRAK2,NFKBIA,NOD2,SBNO2,SLC7A5,TLR2,TNFAIP3,TNIP2
GO:BP	intrinsic apoptotic signaling pathway	GO:0097193	FALSE	9.27299e-06	5.03278	299	340	22	21128	BCL2A1,BCL3,CASP4,CDKN1A,CEBPB,CHEK2,DDIT4,ERN1,HIF1A,HIPK2,HMOX1,IER3,MLLT11,MUC1,MYC,NKX3-1,PLAUR,PTPN2,S100A9,SNAI2,SOD2,YBX3
GO:BP	regulation of locomotion	GO:0040012	FALSE	9.71247e-06	5.01267	1033	340	44	21128	ACVR1B,ADAM8,ADORA3,ARRDC3,BMP2,C5AR1,CCL2,CCL20,CCL7,CCR1,FGR,GNAI2,HGF,HIF1A,HMOX1,HSPA5,ICAM1,IGFBP3,IGFBP5,IL1R1,IL33,IL6,IL8,ITGA2,ITGA5,ITGAX,ITGB3,LAMB1,LAMC2,MAP4K4,MMP14,NOD2,P2RY6,PDGFA,PDGFRA,PGF,PTPN2,RFFL,SLAMF8,SNAI2,SOD2,TIMP1,VEGFA,ZNF703
GO:BP	protein metabolic process	GO:0019538	FALSE	1.04242e-05	4.98196	5482	340	137	21128	ABCA1,ACVR1B,ADAM8,ADAMTS3,ANPEP,ARNTL,ARRDC3,B4GALT1,BCL3,BCL6,BEND3,BIRC3,BMP2,C1GALT1,C1RL,C5AR1,CASP4,CCL2,CDK18,CDK2,CDKN1A,CFB,CHEK2,CHSY1,CKS2,CTSL,DDIT4,DIO2,DNAJB9,EIF4EBP1,ERN1,ERRFI1,FAM20C,FGR,FKBP5,GADD45B,GLRX,GNAI2,HGF,HIF1A,HIPK2,HMGA2,HSPA5,HSPA8,IER3,IGFBP3,IGFBP5,IL1R2,IL33,IL6,IRAK2,ITGA2,ITGA5,ITGB3,JAK3,KDM6B,KLHL25,LAPTM5,LDLR,LIF,LNX1,LPCAT3,LRP8,MAFB,MAP4K4,MAPK13,MARCO,M…
GO:BP	positive regulation of cellular biosynthetic process	GO:0031328	FALSE	1.12095e-05	4.95041	2037	340	68	21128	APLN,ARNTL,ARNTL2,ASS1,BCL3,BMP2,CDK2,CEBPB,CEBPD,CHEK2,E2F3,ELL2,ETS2,FOSL1,FOSL2,GLIS3,HGF,HIF1A,HIPK2,HMGA2,HSPA5,IKZF4,IL33,IL6,IL8,ITGA2,KDM6B,LDLR,LIF,MAFB,MID1IP1,MLLT11,MPV17L2,MUC1,MYC,NAMPT,NFIL3,NFKBIA,NKX3-1,NNMT,NOD2,P2RY6,PIM1,PLSCR1,PRRX1,PTPN2,PTX3,RELB,RFC2,SBNO2,SEC14L2,SHC1,SIX4,SLC11A1,SLC6A9,SLC9A1,SOD2,SOX4,SPP1,TEAD4,TET3,TLR2,TNFSF8,TNIP2,VDR,VEGFA,YBX3,ZNF395
GO:BP	cell adhesion	GO:0007155	FALSE	1.17871e-05	4.92859	1521	340	56	21128	ADAM8,ASS1,B4GALT1,BCL6,BMP2,C1QTNF1,C2CD4A,CCL2,CCR1,CEBPB,CNTNAP1,ICAM1,IL1RAP,IL1RL2,IL4R,IL6,IL8,ITGA2,ITGA5,ITGAX,ITGB3,JAK3,KLHL25,LAMB1,LAMC2,LAPTM5,LIF,LRRC4C,MAP4K4,MMP14,MUC1,NOD2,OLR1,PDGFRA,PLAUR,PNP,PTPN2,RND1,RND3,S100A9,SERPINB8,SHC1,SIGLEC10,SLC39A8,SLC7A11,SLC9A1,SNAI2,SOX4,SPP1,SPRY4,TGM2,THBS2,UBASH3B,VEGFA,VMP1,ZNF703
GO:BP	regulation of cell activation	GO:0050865	FALSE	1.30201e-05	4.88539	713	340	35	21128	ADAM8,BCL6,C1QTNF1,CCL2,CDKN1A,CEBPB,FCGR3A,FGR,HMOX1,IL15RA,IL1RL1,IL1RL2,IL33,IL4R,IL6,JAK3,KLHL25,LAPTM5,LDLR,MMP14,NOD2,PDGFA,PDGFRA,PLSCR1,PNP,PTPN2,SLAMF8,SOX4,THBD,TNFAIP3,TNFRSF9,TNFSF8,TNIP2,TSLP,UBASH3B
GO:BP	cell motility	GO:0048870	FALSE	1.43153e-05	4.8442	1699	340	60	21128	ACVR1B,ADAM8,ADORA3,ARPC5L,B4GALT1,BMP2,C5AR1,CCL2,CCL20,CCL7,CCR1,CXCL1,CXCL3,CXCL5,CXCL6,DDIT4,FGR,GNAI2,HGF,HIF1A,HMOX1,HSPA5,ICAM1,IGFBP3,IGFBP5,IL1R1,IL33,IL6,IL8,ITGA2,ITGA5,ITGAX,ITGB3,LAMB1,LAMC2,LRP8,MAP4K4,MMP14,MSMP,NAV1,NOD2,P2RY6,PDGFA,PDGFRA,PGF,RFFL,RND1,RND3,RSPH9,S100A9,SIX4,SLAMF8,SLC9A1,SNAI2,SOD2,TIMP1,TNFAIP3,TREM1,VEGFA,ZNF703
GO:BP	response to organic cyclic compound	GO:0014070	FALSE	1.44204e-05	4.84102	933	340	41	21128	AKR1C3,AQP9,ARNTL,ASS1,ATP1A1,BMP2,CCL2,CEBPB,CHEK2,DDIT4,ERRFI1,FOSL1,HRH2,HSPA5,HSPA8,IGFBP5,IL6,ITGA2,LRP8,MMP14,MMP19,MSR1,NFKBIA,NKX3-1,NOD2,P2RY2,P2RY6,PDGFA,PIM1,PLIN2,SLC1A3,SLC7A11,SLC9A1,SNAI2,SOD2,SPP1,TGM2,THBD,TLR2,VDR,ZNF703
GO:BP	regulation of leukocyte migration	GO:0002685	FALSE	1.56808e-05	4.80463	229	340	19	21128	ADAM8,C5AR1,CCL2,CCL20,CCL7,CCR1,HMOX1,ICAM1,IL1R1,IL33,IL6,IL8,ITGA2,ITGB3,MMP14,NOD2,PGF,SLAMF8,VEGFA
GO:BP	negative regulation of metabolic process	GO:0009892	FALSE	1.65931e-05	4.78007	3579	340	100	21128	ACVR1B,AKR1C3,APLN,ARNTL,ARRDC3,ATP1A1,BAZ1A,BCL3,BCL6,BEND3,BHLHE40,BIRC3,BMP2,CCR1,CDK2,CDKN1A,CEBPB,CEBPD,DDIT4,EIF4EBP1,ERN1,ERRFI1,ETS2,GADD45B,GLIS3,GNAI2,HGF,HIF1A,HIPK2,HK2,HMGA2,HMOX1,HSPA8,IER3,IGFBP3,IGFBP5,IKZF4,IL1R2,IL1RL1,IL33,IL6,IL8,ITGB3,JAK3,KLHL25,LAPTM5,LDLR,LMNB1,MAFB,MIDN,MMP3,MRTO4,MSR1,MUC1,MVP,MYC,NEAT1,NFIL3,NKX3-1,NLRP6,NOD2,PDGFA,PHC2,PI15,PLAUR,PLEKHN1,PRRX1,PTPN2,PT…
GO:BP	regulation of biosynthetic process	GO:0009889	FALSE	1.66856e-05	4.77766	4190	340	112	21128	ACVR1B,ADAM8,ADORA3,AKR1C3,APLN,ARNTL,ARNTL2,ASS1,ATP1A1,BAZ1A,BCL3,BCL6,BEND3,BHLHE40,BMP2,CCL2,CDK18,CDK2,CDKN1A,CEBPB,CEBPD,CHEK2,CKS2,DIO2,E2F3,EIF4EBP1,ELL2,ERRFI1,ETS2,FOSL1,FOSL2,GLIS3,HGF,HIF1A,HIPK2,HMGA2,HMOX1,HSPA5,HSPA8,IGFBP5,IKZF4,IL1RAP,IL33,IL6,IL8,IRAK2,ITGA2,JAK3,KDM6B,KLF17,KLHL25,LDLR,LIF,LPCAT3,LRP8,MAFB,MID1IP1,MLLT11,MPV17L2,MUC1,MYC,NAMPT,NFIL3,NFKBIA,NKX3-1,NNMT,NOD2,P2RY…
GO:BP	granulocyte migration	GO:0097530	FALSE	1.77822e-05	4.75002	160	340	16	21128	ADAM8,C5AR1,CCL2,CCL20,CCL7,CXCL1,CXCL3,CXCL5,CXCL6,IL1R1,IL8,NOD2,S100A9,SLAMF8,TREM1,VEGFA
GO:BP	negative regulation of cellular metabolic process	GO:0031324	FALSE	1.87987e-05	4.72587	2244	340	72	21128	AKR1C3,ARNTL,ATP1A1,BCL3,BCL6,BEND3,BHLHE40,BMP2,CDK2,CDKN1A,CEBPB,CEBPD,DDIT4,EIF4EBP1,ERRFI1,ETS2,GADD45B,GLIS3,GNAI2,HGF,HIF1A,HIPK2,HK2,HMGA2,HMOX1,HSPA8,IER3,IGFBP3,IGFBP5,IKZF4,IL33,IL6,ITGB3,JAK3,KLHL25,LDLR,MAFB,MIDN,MMP3,MUC1,MVP,MYC,NFIL3,NKX3-1,PDGFA,PHC2,PLEKHN1,PRRX1,PTPN2,PTX3,PUS7,RELB,RGS2,SBNO2,SHC1,SHMT2,SIX4,SLC11A1,SLC7A5,SNAI2,SPRY4,SRSF12,TIMP1,TLE2,TNFAIP3,TRAF3IP2,TXN,UBAS…
GO:BP	female pregnancy	GO:0007565	TRUE	2.17157e-05	4.66323	185	340	17	21128	ACVR1B,FOSL1,IGFBP5,ITGA2,ITGA5,ITGB3,LIF,PGF,RGS2,SLC2A1,SPP1,TEAD4,THBD,TIMP1,VDR,VEGFA,VMP1
GO:BP	regulation of cell motility	GO:2000145	FALSE	2.41082e-05	4.61784	988	340	42	21128	ACVR1B,ADAM8,ADORA3,BMP2,C5AR1,CCL2,CCL20,CCL7,CCR1,FGR,GNAI2,HGF,HIF1A,HMOX1,HSPA5,ICAM1,IGFBP3,IGFBP5,IL1R1,IL33,IL6,IL8,ITGA2,ITGA5,ITGAX,ITGB3,LAMB1,LAMC2,MAP4K4,MMP14,NOD2,P2RY6,PDGFA,PDGFRA,PGF,RFFL,SLAMF8,SNAI2,SOD2,TIMP1,VEGFA,ZNF703
GO:BP	apoptotic signaling pathway	GO:0097190	FALSE	2.84624e-05	4.54573	597	340	31	21128	ACVR1B,BCL2A1,BCL3,CASP4,CDKN1A,CEBPB,CHEK2,DDIT4,ERN1,GGCT,GNAI2,HGF,HIF1A,HIPK2,HMOX1,ICAM1,IER3,IL33,MLLT11,MUC1,MYC,NKX3-1,PLAUR,PTPN2,RFFL,S100A9,SNAI2,SOD2,TNFAIP3,TRAF1,YBX3
GO:BP	regulation of cell differentiation	GO:0045595	FALSE	3.35822e-05	4.47389	1567	340	56	21128	ABCA1,ACVR1B,ADAM8,ARNTL,BCL6,BHLHE40,BMP2,CCDC71L,CCR1,CEBPB,CEBPD,ERRFI1,FAM20C,HGF,HIF1A,IGFBP3,IGFBP5,IL15RA,IL1RL2,IL33,IL4R,IL6,ITGB3,JAK3,KLHL25,LAMB1,LDLR,LIF,LRP8,MAFB,MEDAG,MMP14,MSR1,MYC,NFKBIA,PDGFRA,PIM1,PNP,PTPN2,PUS7,RGS2,SIX4,SLAMF8,SLC6A6,SLC7A5,SNAI2,SOD2,SOX4,SPP1,SPRED3,TGM2,TLR2,UBASH3B,VDR,VEGFA,ZNF703
GO:BP	regulation of cell adhesion	GO:0030155	FALSE	3.46845e-05	4.45986	777	340	36	21128	ADAM8,ASS1,BCL6,BMP2,C1QTNF1,C2CD4A,CCL2,CEBPB,IL1RL2,IL4R,IL6,IL8,ITGA2,ITGA5,ITGB3,JAK3,KLHL25,LAMB1,LAPTM5,LIF,MAP4K4,MMP14,MUC1,NOD2,PLAUR,PNP,PTPN2,RND1,SLC9A1,SNAI2,SOX4,SPRY4,TGM2,UBASH3B,VEGFA,ZNF703
GO:BP	leukocyte chemotaxis	GO:0030595	FALSE	3.61408e-05	4.442	241	340	19	21128	ADAM8,C5AR1,CCL2,CCL20,CCL7,CCR1,CXCL1,CXCL3,CXCL5,CXCL6,IL6,IL8,MSMP,NOD2,PGF,S100A9,SLAMF8,TREM1,VEGFA
GO:BP	multi-multicellular organism process	GO:0044706	FALSE	3.69196e-05	4.43274	216	340	18	21128	ACVR1B,B4GALT1,FOSL1,IGFBP5,ITGA2,ITGA5,ITGB3,LIF,PGF,RGS2,SLC2A1,SPP1,TEAD4,THBD,TIMP1,VDR,VEGFA,VMP1
GO:BP	cellular response to endogenous stimulus	GO:0071495	FALSE	3.70819e-05	4.43084	1445	340	53	21128	ACVR1B,ADAMTS3,AKR1C1,AKR1C3,APLN,AQP9,ARNTL,ASS1,ATP1A1,BMP2,CASP4,CCL2,CEBPB,CTSL,DDIT4,ERN1,ERRFI1,FAM20C,GNAI2,HGF,HIF1A,HIPK2,HRH2,HSPA5,HSPA8,ICAM1,IGFBP5,IL8,ITGA5,ITGB3,JAK3,LRP8,MAPK13,MT1G,NKX3-1,NOD2,P2RY2,P2RY6,PDGFA,PDGFRA,PGF,PTPN2,SH2B2,SHC1,SLC1A3,SLC7A5,SLC9A1,SNAI2,SPRED3,SPRY4,TGM2,VEGFA,ZNF703
GO:BP	mononuclear cell differentiation	GO:1903131	FALSE	3.91636e-05	4.40712	474	340	27	21128	ADAM8,BCL3,BCL6,CEBPB,CTSL,DNAJB9,IL15RA,IL1RL2,IL4R,IL6,JAK3,KLHL25,MAFB,MMP14,MT1G,MYC,NFIL3,PNP,PTPN2,RELB,SLAMF8,SOX4,ST3GAL1,TNFRSF9,TNFSF8,TRAF3IP2,VEGFA
GO:BP	response to wounding	GO:0009611	FALSE	4.28998e-05	4.36754	574	340	30	21128	ADORA3,B4GALT1,C1QTNF1,CCR1,CDKN1A,HIF1A,HMOX1,IL33,IL6,ITGA2,ITGA5,ITGB3,NLRP6,PDGFA,PDGFRA,PLAUR,PLSCR1,SERPINA1,SIGLEC10,SLC11A1,SLC1A3,SLC7A11,SOD2,SPP1,TFPI2,THBD,TIMP1,TNFAIP3,UBASH3B,VEGFA
GO:BP	multicellular organism development	GO:0007275	FALSE	4.2907e-05	4.36747	4627	340	119	21128	ACVR1B,ADAM8,ADAMTS3,AKR1C3,ANPEP,APLN,ARNTL,ASS1,B4GALT1,BCL3,BCL6,BHLHE40,BMP2,C1GALT1,C5AR1,CAPG,CCL2,CCR1,CDKN1A,CEBPB,CHSY1,CLMP,CNTNAP1,CXCL1,DDIT4,ERRFI1,ESM1,ETS2,FAM20C,FGR,FOSL1,HGF,HIF1A,HIPK2,HK2,HMGA2,HMOX1,HSPA5,IGFBP5,IL15RA,IL1RAP,IL1RL2,IL33,IL4R,IL6,IL8,ITGA2,ITGA5,ITGAX,ITGB3,JAK3,KCNK3,KDM6B,KLHL25,LAMB1,LAMC2,LDLR,LHFPL2,LIF,LRP8,LRRC4C,MAFB,MAP4K4,MFAP2,MMP14,MMP19,MYC,NAV1,…
GO:BP	positive regulation of cytokine production	GO:0001819	FALSE	4.46693e-05	4.34999	477	340	27	21128	ADAM8,BCL3,C5AR1,CEBPB,CLEC5A,FCGR3A,FGR,HGF,HIF1A,HILPDA,HMOX1,IL1R1,IL1RAP,IL1RL1,IL1RL2,IL33,IL4R,IL6,LAPTM5,MAPK13,NOD2,ORM2,PNP,SLC11A1,SLC7A5,TLR2,TSLP
GO:BP	regulation of gene expression	GO:0010468	FALSE	4.58712e-05	4.33846	5494	340	135	21128	ACVR1B,ADAM8,ADORA3,APLN,ARNTL,ARNTL2,BAZ1A,BCL3,BCL6,BEND3,BHLHE40,BMP2,C1QTNF1,C5AR1,CCR1,CDK18,CDK2,CDKN1A,CEBPB,CEBPD,CHEK2,CKS2,CLEC5A,CXCL6,DIO2,DNAJB9,E2F3,EIF4EBP1,ELL2,ERN1,ERRFI1,ETS2,FCGR3A,FGR,FOSL1,FOSL2,GLIS3,HGF,HIF1A,HILPDA,HIPK2,HMGA2,HMOX1,HSPA5,HSPA8,IGFBP5,IKZF4,IL1R1,IL1R2,IL1RAP,IL1RL1,IL1RL2,IL33,IL4R,IL6,IL8,IRAK2,ITGA2,ITGAX,ITGB3,JAK3,KDM6B,KLF17,KLHL25,LAPTM5,LDLR,LIF,L…
GO:BP	chemical homeostasis	GO:0048878	FALSE	5.05257e-05	4.29649	1014	340	42	21128	ABCA1,AKR1C1,ATP1A1,CA12,CCL7,CCR1,ERN1,FTH1,GNAI2,HIF1A,HK2,HMOX1,ICAM1,IGFBP5,IL6,ITGB3,LDLR,MT1E,MT1G,MT1M,MT1X,MT2A,MYC,P2RY2,P2RY6,PTPN2,PYGL,S100A9,SLAMF8,SLC11A1,SLC1A3,SLC39A8,SLC4A8,SLC7A11,SLC9A1,SOD2,SOX4,STEAP1,TGM2,UBASH3B,VDR,VEGFA
GO:BP	cellular response to organic cyclic compound	GO:0071407	FALSE	5.2102e-05	4.28315	579	340	30	21128	AKR1C3,AQP9,ARNTL,ASS1,ATP1A1,BMP2,CCL2,CEBPB,CHEK2,DDIT4,ERRFI1,HRH2,HSPA5,HSPA8,IGFBP5,ITGA2,LRP8,MSR1,NKX3-1,NOD2,P2RY2,P2RY6,PIM1,SLC1A3,SLC9A1,SNAI2,SPP1,TGM2,VDR,ZNF703
GO:BP	regulation of cellular biosynthetic process	GO:0031326	FALSE	5.61888e-05	4.25035	4124	340	109	21128	ACVR1B,ADAM8,ADORA3,AKR1C3,APLN,ARNTL,ARNTL2,ASS1,ATP1A1,BAZ1A,BCL3,BCL6,BEND3,BHLHE40,BMP2,CDK18,CDK2,CDKN1A,CEBPB,CEBPD,CHEK2,CKS2,DIO2,E2F3,EIF4EBP1,ELL2,ETS2,FOSL1,FOSL2,GLIS3,HGF,HIF1A,HIPK2,HMGA2,HMOX1,HSPA5,HSPA8,IGFBP5,IKZF4,IL1RAP,IL33,IL6,IL8,IRAK2,ITGA2,JAK3,KDM6B,KLF17,KLHL25,LDLR,LIF,LRP8,MAFB,MID1IP1,MLLT11,MPV17L2,MUC1,MYC,NAMPT,NFIL3,NFKBIA,NKX3-1,NNMT,NOD2,P2RY6,PDGFA,PHC2,PIM1,P…
GO:BP	positive regulation of defense response	GO:0031349	FALSE	6.94508e-05	4.15832	424	340	25	21128	ADAM8,ALOX5AP,BIRC3,C2CD4A,CASP4,CEBPB,IL1RL1,IL33,IL6,IRAK2,ITGA2,LDLR,MAPK13,NEAT1,NFKBIA,NLRP6,NOD2,OSMR,PLSCR1,S100A9,TIFA,TLR2,TNFAIP3,TNIP2,TSLP
GO:BP	biosynthetic process	GO:0009058	FALSE	7.04895e-05	4.15188	5973	340	143	21128	A4GALT,ABCA1,ACVR1B,ADAM8,ADAMTS3,ADK,ADORA3,AKR1C3,ALOX5AP,APLN,ARNTL,ARNTL2,ASS1,ATP1A1,B4GALT1,BAZ1A,BCAT1,BCL3,BCL6,BEND3,BHLHE40,BMP2,C1GALT1,C5AR1,CCL2,CDK18,CDK2,CDKN1A,CEBPB,CEBPD,CHEK2,CHST1,CHSY1,CKS2,DIO2,E2F3,EIF4EBP1,ELL2,ERRFI1,ETS2,FOSL1,FOSL2,GCH1,GK,GLIS3,HGF,HIF1A,HIPK2,HMGA2,HMOX1,HSPA5,HSPA8,IGFBP5,IKZF4,IL1RAP,IL33,IL6,IL8,IRAK2,ITGA2,ITPKC,JAK3,KDM6B,KLF17,KLHL25,LDLR,LIF,LP…
GO:BP	positive regulation of cell death	GO:0010942	FALSE	7.34852e-05	4.1338	588	340	30	21128	ADAM8,AKR1C3,B4GALT1,BCL6,BMP2,CCL2,CDKN1A,CHEK2,DDIT4,E2F3,FOSL1,GADD45B,HMOX1,IGFBP3,IL6,LAPTM5,MLLT11,MMP3,MYC,NKX3-1,PHLDA1,PLEKHN1,PTPN2,S100A9,SLC6A6,SLC9A1,SOD2,SOX4,TGM2,VDR
GO:BP	response to interleukin-1	GO:0070555	FALSE	8.15518e-05	4.08857	133	340	14	21128	CCL2,CCL20,CCL7,CEBPB,HIF1A,IL1R1,IL1R2,IL1RL2,IL6,IL8,IRAK2,MAPK13,NKX3-1,TNIP2
GO:BP	regulation of body fluid levels	GO:0050878	FALSE	8.35407e-05	4.0781	367	340	23	21128	APLN,C1QTNF1,GNAI2,HIF1A,HK2,IL6,ITGA2,ITGB3,NLRP6,NME1,P2RY2,PDGFA,PDGFRA,PLAUR,PLSCR1,SERPINA1,SLC7A11,TFPI2,THBD,TRAF3IP2,UBASH3B,VDR,VEGFA
GO:BP	response to organonitrogen compound	GO:0010243	FALSE	8.75133e-05	4.05793	1034	340	42	21128	ABCA1,AQP9,ASS1,C5AR1,CASP4,CD68,CEBPB,DNAJB9,ERRFI1,FOSL1,GNAI2,HRH2,HSPA5,ICAM1,IGFBP5,IL6,ITGA2,ITGB3,JAK3,LDLR,MAPK13,MMP19,MMP3,NFKBIA,NNMT,NOD2,P2RY2,P2RY6,PDGFRA,PTPN2,RGS2,SH2B2,SHC1,SLC1A3,SLC2A1,SLC7A5,SLC9A1,TGM2,THBD,TIMP1,TLR2,TNFAIP3
GO:BP	multi-organism reproductive process	GO:0044703	FALSE	0.00010778	3.96746	206	340	17	21128	ACVR1B,FOSL1,IGFBP5,ITGA2,ITGA5,ITGB3,LIF,PGF,RGS2,SLC2A1,SPP1,TEAD4,THBD,TIMP1,VDR,VEGFA,VMP1
GO:BP	positive regulation of cell differentiation	GO:0045597	FALSE	0.000108339	3.96521	850	340	37	21128	ACVR1B,ADAM8,ARNTL,BCL6,BMP2,CCDC71L,CCR1,CEBPB,CEBPD,FAM20C,HGF,HIF1A,IGFBP3,IL15RA,IL1RL2,IL33,IL4R,IL6,KLHL25,LAMB1,LIF,LRP8,MEDAG,MMP14,MSR1,PIM1,PNP,SLC6A6,SLC7A5,SNAI2,SOD2,SOX4,TGM2,TLR2,VDR,VEGFA,ZNF703
GO:BP	regulation of transport	GO:0051049	FALSE	0.000112303	3.94961	1754	340	59	21128	ABCA1,ADAM8,ADORA3,APLN,ARNTL,ATP1A1,BEST1,BMP2,C1QTNF1,CCL2,CCR1,CEBPB,FGR,GLRX,GNAI2,HIF1A,HK2,HMOX1,HSPA8,IER3,IL15RA,IL4R,IL6,ITGA2,ITGB3,JAK3,KCNK15,KCNK3,LIF,LPCAT3,MIDN,NETO2,NFKBIA,NKX3-1,NLRP6,NOD2,P2RY2,P2RY6,PIM1,PLSCR1,PTX3,RGS2,SLC11A1,SLC43A2,SLC4A8,SLC6A9,SLC7A11,SLC7A5,SLC9A1,SNCG,SOX4,SPP1,STX1A,TGM2,TLR2,TXN,UBASH3B,VEGFA,VMP1
GO:BP	positive regulation of molecular function	GO:0044093	FALSE	0.000112549	3.94866	1580	340	55	21128	ADAM8,ADORA3,ARRDC3,BMP2,C5AR1,CCL2,CCL20,CCL7,CDKN1A,CKS2,ERN1,FGR,FOSL1,GCH1,GLRX,GNAI2,HIF1A,HIPK2,HMGA2,IL1RAP,IL6,IRAK2,ITGA2,ITGB3,KCNK3,LAPTM5,LRP8,MAP4K4,MID1IP1,MYC,NKX3-1,NLRP6,NME1,NOD2,P2RY6,PDGFA,PDGFRA,PIK3R5,PLAUR,PLSCR1,RASGEF1B,RFC2,RGS16,RIPK4,S100A9,SLC11A1,SLC9A1,TGM2,TLR2,TNFAIP8L3,TRAF1,TXN,VDR,VEGFA,VMP1
GO:BP	response to nitrogen compound	GO:1901698	FALSE	0.000113545	3.94483	1123	340	44	21128	ABCA1,AQP9,ASS1,C5AR1,CASP4,CD68,CDK2,CEBPB,DNAJB9,ERRFI1,FOSL1,GNAI2,HRH2,HSPA5,ICAM1,IGFBP5,IL6,ITGA2,ITGB3,JAK3,LDLR,MAPK13,MMP19,MMP3,NFKBIA,NNMT,NOD2,P2RY2,P2RY6,PDGFRA,PTPN2,RGS2,SH2B2,SHC1,SLC1A3,SLC2A1,SLC7A5,SLC9A1,TGM2,THBD,TIMP1,TLR2,TNFAIP3,TXN
GO:BP	cell chemotaxis	GO:0060326	FALSE	0.000117306	3.93068	315	340	21	21128	ADAM8,C5AR1,CCL2,CCL20,CCL7,CCR1,CXCL1,CXCL3,CXCL5,CXCL6,HGF,IL6,IL8,MSMP,NOD2,PDGFRA,PGF,S100A9,SLAMF8,TREM1,VEGFA
GO:BP	negative regulation of signal transduction	GO:0009968	FALSE	0.000124033	3.90646	1248	340	47	21128	APCDD1L,APLN,ARNTL,ARRDC3,BCL3,BCL6,BMP2,CHEK2,DDIT4,DNAJB9,ERRFI1,GNAI2,HGF,HIF1A,HIPK2,HMOX1,HSPA5,ICAM1,IER3,IGFBP3,IGFBP5,IL1R2,IL6,IL8,LAPTM5,LIF,MMP14,MUC1,MVP,MYC,NFKBIA,NKX3-1,NLRP6,NOD2,PLAUR,PTPN2,RFFL,RGS16,RGS2,SNAI2,SOD2,SPRED3,SPRY4,TLE2,TNFAIP3,UBASH3B,YBX3
GO:BP	negative regulation of nitrogen compound metabolic process	GO:0051172	FALSE	0.000134493	3.8713	2401	340	73	21128	ARNTL,BCL3,BCL6,BEND3,BHLHE40,BIRC3,BMP2,CDK2,CDKN1A,CEBPB,CEBPD,DDIT4,EIF4EBP1,ERRFI1,ETS2,GADD45B,GLIS3,GNAI2,HGF,HIPK2,HMGA2,HSPA8,IER3,IGFBP3,IGFBP5,IKZF4,IL1R2,IL33,IL6,ITGB3,JAK3,LDLR,MAFB,MUC1,MVP,MYC,NFIL3,NKX3-1,PHC2,PI15,PLAUR,PLEKHN1,PRRX1,PTPN2,PTX3,PUS7,RELB,RFFL,RGS2,SBNO2,SERPINA1,SERPINA3,SERPINB1,SERPINB8,SHC1,SHMT2,SIX4,SLC11A1,SNAI2,SOX4,SPRY4,SRSF12,TFPI2,TIMP1,TLE2,TNFAIP3,TR…
GO:BP	regulation of biological quality	GO:0065008	FALSE	0.000152831	3.81579	2790	340	81	21128	ABCA1,ADH4,AKR1C1,AKR1C3,ANPEP,APLN,ARNTL,ARPC5L,ATP1A1,BMP2,C1QTNF1,C2CD4A,C5AR1,CAPG,CCR1,CDC37L1,CDC42EP4,CHEK2,CNTNAP1,CTSL,DIO2,FPR1,GCH1,GLRX,GNAI2,HIF1A,HK2,HMOX1,HRH2,HSPA8,IER3,IFI30,IL1RAP,IL6,ITGA2,ITGB3,JAK3,KCNK15,KCNK3,LAPTM5,LIF,LRP8,MIDN,MLLT11,NKX3-1,NLRP6,NME1,P2RY2,PDGFA,PDGFRA,PIM1,PLAUR,PLEKHN1,PLSCR1,RGS2,SERPINA1,SIX4,SLC11A1,SLC16A10,SLC1A3,SLC39A8,SLC4A8,SLC7A11,SLC7A5,SL…
GO:BP	multicellular organismal homeostasis	GO:0048871	FALSE	0.000172502	3.76321	754	340	34	21128	ACVR1B,ADAM8,ARNTL,ARRDC3,BCL6,CEBPB,CXCL6,DIO2,HIF1A,HIPK2,HMOX1,IL4R,IL6,ITGB3,JAK3,KDM6B,LPCAT3,MAFB,MFAP2,NLRP6,NOD2,PTPN2,SERPINA3,SH2B2,SLC11A1,SLC2A1,SLC39A8,SLC7A11,SOX4,SPP1,TNFAIP3,TRAF3IP2,UBASH3B,VEGFA
GO:BP	organic substance biosynthetic process	GO:1901576	FALSE	0.000174132	3.75912	5886	340	140	21128	A4GALT,ABCA1,ACVR1B,ADAM8,ADK,ADORA3,AKR1C3,ALOX5AP,APLN,ARNTL,ARNTL2,ASS1,ATP1A1,B4GALT1,BAZ1A,BCAT1,BCL3,BCL6,BEND3,BHLHE40,BMP2,C1GALT1,C5AR1,CCL2,CDK18,CDK2,CDKN1A,CEBPB,CEBPD,CHEK2,CHST1,CHSY1,CKS2,DIO2,E2F3,EIF4EBP1,ELL2,ETS2,FOSL1,FOSL2,GCH1,GK,GLIS3,HGF,HIF1A,HIPK2,HMGA2,HMOX1,HSPA5,HSPA8,IGFBP5,IKZF4,IL1RAP,IL33,IL6,IL8,IRAK2,ITGA2,ITPKC,JAK3,KDM6B,KLF17,KLHL25,LDLR,LIF,LPCAT3,LRP8,MAFB,…
GO:BP	gland development	GO:0048732	FALSE	0.00017733	3.75122	445	340	25	21128	APLN,ASS1,BMP2,CEBPB,HGF,HIF1A,HK2,HMOX1,IGFBP5,IL6,ITGA2,MAFB,NKX3-1,NME1,PDGFA,PDGFRA,SIX4,SLC7A5,SNAI2,SOD2,TGM2,TNFAIP3,VDR,VEGFA,ZNF703
GO:BP	regulation of smooth muscle cell proliferation	GO:0048660	FALSE	0.000187577	3.72682	142	340	14	21128	APLN,BMP2,CDKN1A,ERN1,GNAI2,HMOX1,IGFBP3,IGFBP5,IL6,ITGA2,ITGB3,P2RY6,SOD2,TNFAIP3
GO:BP	transition metal ion homeostasis	GO:0055076	FALSE	0.000187577	3.72682	142	340	14	21128	FTH1,HIF1A,HMOX1,MT1E,MT1G,MT1M,MT1X,MT2A,MYC,S100A9,SLC11A1,SLC39A8,SOD2,STEAP1
GO:BP	positive regulation of ERK1 and ERK2 cascade	GO:0070374	FALSE	0.000188215	3.72535	214	340	17	21128	BMP2,C5AR1,CCL2,CCL20,CCL7,CCR1,GNAI2,ICAM1,ITGB3,MARCO,NOD2,P2RY6,PDGFA,PDGFRA,SHC1,TNFAIP8L3,VEGFA
GO:BP	regulation of localization	GO:0032879	FALSE	0.000206736	3.68458	2101	340	66	21128	ABCA1,ADAM8,ADORA3,APLN,ARNTL,ATP1A1,BEST1,BMP2,C1QTNF1,CCL2,CCR1,CEBPB,FGR,GLRX,GNAI2,HIF1A,HILPDA,HK2,HMOX1,HSPA8,IER3,IL15RA,IL4R,IL6,ITGA2,ITGB3,JAK3,KCNK15,KCNK3,LIF,LPCAT3,MIDN,MMP14,MSR1,NETO2,NFKBIA,NKX3-1,NLRP6,NOD2,P2RY2,P2RY6,PIM1,PLIN2,PLSCR1,PTPN2,PTX3,RGS2,SIX4,SLC11A1,SLC43A2,SLC4A8,SLC6A9,SLC7A11,SLC7A5,SLC9A1,SNCG,SOX4,SPP1,STX1A,STX6,TGM2,TLR2,TXN,UBASH3B,VEGFA,VMP1
GO:BP	negative regulation of signaling	GO:0023057	FALSE	0.00020743	3.68313	1353	340	49	21128	APCDD1L,APLN,ARNTL,ARRDC3,BCL3,BCL6,BMP2,CHEK2,DDIT4,DNAJB9,ERRFI1,GNAI2,HGF,HIF1A,HIPK2,HMOX1,HSPA5,ICAM1,IER3,IGFBP3,IGFBP5,IL1R2,IL6,IL8,LAPTM5,LDLR,LIF,MIDN,MMP14,MUC1,MVP,MYC,NFKBIA,NKX3-1,NLRP6,NOD2,PLAUR,PTPN2,RFFL,RGS16,RGS2,SNAI2,SOD2,SPRED3,SPRY4,TLE2,TNFAIP3,UBASH3B,YBX3
GO:BP	protein phosphorylation	GO:0006468	FALSE	0.000230286	3.63773	1571	340	54	21128	ACVR1B,ADAM8,BMP2,C5AR1,CCL2,CDK18,CDK2,CDKN1A,CHEK2,CKS2,DDIT4,ERN1,ERRFI1,FAM20C,FGR,GADD45B,HGF,HIPK2,HMGA2,IGFBP3,IL6,IRAK2,ITGA5,ITGB3,JAK3,LIF,LRP8,MAP4K4,MAPK13,MARCO,MLKL,MVP,NEK6,NKX3-1,NOD2,PDGFA,PDGFRA,PGF,PIK3R5,PIM1,PLAUR,PTPN2,RGS2,RIPK4,SHC1,SLC11A1,SPRY4,ST3GAL1,TLR2,TNFAIP3,TSLP,TXN,UBASH3B,VEGFA
GO:BP	regulation of phosphorus metabolic process	GO:0051174	FALSE	0.000236493	3.62618	1401	340	50	21128	ADAM8,BEND3,BMP2,C5AR1,CDKN1A,CHEK2,CKS2,DDIT4,ERN1,ERRFI1,FAM20C,FGR,GADD45B,GNAI2,HGF,HIF1A,HIPK2,HMGA2,IER3,IGFBP3,IL6,ITGA2,ITGA5,ITGB3,LDLR,LIF,LRP8,MARCO,MIDN,MVP,NKX3-1,NOD2,P2RY6,PDGFA,PDGFRA,PGF,PIK3R5,PLAUR,PTPN2,RGS2,SHC1,SLAMF8,SLC11A1,SPRY4,TNFAIP3,TNFAIP8L3,TSLP,TXN,UBASH3B,VEGFA
GO:BP	phosphorus metabolic process	GO:0006793	FALSE	0.000240313	3.61922	2868	340	82	21128	ACVR1B,ADAM8,ADK,BEND3,BMP2,C5AR1,CCL2,CDK18,CDK2,CDKN1A,CHEK2,CKS2,DDIT4,ERN1,ERRFI1,FAM20C,FGR,GADD45B,GCH1,GK,GNAI2,HGF,HIF1A,HIPK2,HK2,HMGA2,HSPA8,IER3,IGFBP3,IL6,IRAK2,ITGA2,ITGA5,ITGB3,ITPKC,JAK3,LDLR,LIF,LPCAT3,LRP8,MAP4K4,MAPK13,MARCO,MIDN,MLKL,MVP,NAMPT,NANS,NEK6,NKX3-1,NME1,NNMT,NOD2,NUDT15,P2RY6,PDGFA,PDGFRA,PGF,PGK1,PIK3R5,PIM1,PLAUR,PLSCR1,PNP,PTPN2,PYGL,RGS2,RIPK4,SHC1,SLAMF8,SLC11A…
GO:BP	chemotaxis	GO:0006935	FALSE	0.000243769	3.61302	621	340	30	21128	ADAM8,C5AR1,CCL2,CCL20,CCL7,CCR1,CXCL1,CXCL3,CXCL5,CXCL6,FOSL1,FPR1,HGF,IL6,IL8,ITGA2,ITGB3,LAMC2,MSMP,NOD2,PDGFA,PDGFRA,PGF,PLAUR,PTPN2,S100A9,SLAMF8,TREM1,TUBB3,VEGFA
GO:BP	taxis	GO:0042330	FALSE	0.000261368	3.58275	623	340	30	21128	ADAM8,C5AR1,CCL2,CCL20,CCL7,CCR1,CXCL1,CXCL3,CXCL5,CXCL6,FOSL1,FPR1,HGF,IL6,IL8,ITGA2,ITGB3,LAMC2,MSMP,NOD2,PDGFA,PDGFRA,PGF,PLAUR,PTPN2,S100A9,SLAMF8,TREM1,TUBB3,VEGFA
GO:BP	cell development	GO:0048468	FALSE	0.000261812	3.58201	2728	340	79	21128	ACVR1B,ADAM8,ARNTL,B4GALT1,BCL3,BCL6,BHLHE40,BMP2,C1GALT1,C5AR1,CCR1,CEBPB,CEBPD,CHSY1,CLEC5A,CNTNAP1,CTSL,DNAJB9,FAM20C,FOSL2,GPATCH4,HGF,HIF1A,HIPK2,HSPA5,ICAM1,IL15RA,IL1RL2,IL33,IL4R,IL6,JAK3,KLHL25,LAMB1,LAMC2,LDLR,LIF,LRP8,LRRC4C,MAFB,MAP4K4,MMP14,MT1G,MYC,NDRG1,NFIL3,NFKBIA,PDGFRA,PIM1,PNP,PRRX1,PTPN2,PTX3,PUS7,RELB,RGS2,RND1,RRS1,S100A9,SBNO2,SIX4,SLAMF8,SLC1A3,SLC7A5,SNAI2,SOD2,SOX4,SPP1…
GO:BP	response to inorganic substance	GO:0010035	FALSE	0.000273556	3.56295	555	340	28	21128	AKR1C3,ALOX5AP,ASS1,CDK2,ERN1,FOSL1,GCH1,HGF,HIF1A,HMOX1,HSPA5,IL6,ITPKC,KCNK3,KDM6B,MAPK13,MMP3,MT1E,MT1G,MT1M,MT1X,MT2A,NDRG1,PDGFA,PLSCR1,SOD2,TNFAIP3,TXN
GO:BP	positive regulation of programmed cell death	GO:0043068	FALSE	0.000282652	3.54875	522	340	27	21128	ADAM8,AKR1C3,B4GALT1,BCL6,BMP2,CCL2,CDKN1A,CHEK2,E2F3,FOSL1,GADD45B,HMOX1,IGFBP3,IL6,LAPTM5,MLLT11,MYC,NKX3-1,PHLDA1,PLEKHN1,PTPN2,S100A9,SLC9A1,SOD2,SOX4,TGM2,VDR
GO:BP	smooth muscle cell proliferation	GO:0048659	FALSE	0.000289926	3.53771	147	340	14	21128	APLN,BMP2,CDKN1A,ERN1,GNAI2,HMOX1,IGFBP3,IGFBP5,IL6,ITGA2,ITGB3,P2RY6,SOD2,TNFAIP3
GO:BP	response to xenobiotic stimulus	GO:0009410	FALSE	0.000296597	3.52783	425	340	24	21128	ABCC3,AKR1C1,ASS1,ATP1A1,CHEK2,FOSL1,HMOX1,HSPA5,ITGA2,ITGB3,KCNK3,LRP8,MYC,NKX3-1,NNMT,NUDT15,PDGFA,PGF,PLIN2,PNP,SLC1A3,SMOX,SOD2,TRAF3IP2
GO:BP	phosphate-containing compound metabolic process	GO:0006796	FALSE	0.000343835	3.46365	2843	340	81	21128	ACVR1B,ADAM8,ADK,BEND3,BMP2,C5AR1,CCL2,CDK18,CDK2,CDKN1A,CHEK2,CKS2,DDIT4,ERN1,ERRFI1,FAM20C,FGR,GADD45B,GCH1,GK,GNAI2,HGF,HIF1A,HIPK2,HK2,HMGA2,HSPA8,IER3,IGFBP3,IL6,IRAK2,ITGA2,ITGA5,ITGB3,ITPKC,JAK3,LDLR,LIF,LPCAT3,LRP8,MAP4K4,MAPK13,MARCO,MIDN,MLKL,MVP,NAMPT,NEK6,NKX3-1,NME1,NNMT,NOD2,NUDT15,P2RY6,PDGFA,PDGFRA,PGF,PGK1,PIK3R5,PIM1,PLAUR,PLSCR1,PNP,PTPN2,PYGL,RGS2,RIPK4,SHC1,SLAMF8,SLC11A1,SLC…
GO:BP	neutrophil chemotaxis	GO:0030593	FALSE	0.00035302	3.4522	106	340	12	21128	C5AR1,CCL2,CCL20,CCL7,CXCL1,CXCL3,CXCL5,CXCL6,IL8,NOD2,S100A9,TREM1
GO:BP	cellular biosynthetic process	GO:0044249	FALSE	0.000393884	3.40463	5793	340	137	21128	A4GALT,ABCA1,ACVR1B,ADAM8,ADK,ADORA3,AKR1C3,ALOX5AP,APLN,ARNTL,ARNTL2,ASS1,ATP1A1,B4GALT1,BAZ1A,BCAT1,BCL3,BCL6,BEND3,BHLHE40,BMP2,C1GALT1,C5AR1,CDK18,CDK2,CDKN1A,CEBPB,CEBPD,CHEK2,CHST1,CHSY1,CKS2,DIO2,E2F3,EIF4EBP1,ELL2,ETS2,FOSL1,FOSL2,GCH1,GK,GLIS3,HGF,HIF1A,HIPK2,HMGA2,HMOX1,HSPA5,HSPA8,IGFBP5,IKZF4,IL1RAP,IL33,IL6,IL8,IRAK2,ITGA2,ITPKC,JAK3,KDM6B,KLF17,KLHL25,LDLR,LIF,LPCAT3,LRP8,MAFB,MID1I…
GO:BP	negative regulation of cell population proliferation	GO:0008285	FALSE	0.000394227	3.40425	707	340	32	21128	ADORA3,APLN,B4GALT1,BCL6,BMP2,CCL2,CDKN1A,CEBPB,CXCL1,E2F3,FOSL1,FTH1,HMOX1,IFI30,IGFBP3,IGFBP5,IL33,IL6,IL8,LIF,MYC,NDRG1,NKX3-1,NME1,PTPN2,SNAI2,SOD2,SOX4,TLR2,TNFAIP3,TNFRSF9,VDR
GO:BP	positive regulation of leukocyte migration	GO:0002687	FALSE	0.000405499	3.39201	151	340	14	21128	ADAM8,C5AR1,CCL20,CCL7,CCR1,ICAM1,IL1R1,IL6,IL8,ITGA2,ITGB3,MMP14,PGF,VEGFA
GO:BP	innate immune response	GO:0045087	FALSE	0.000453821	3.34312	978	340	39	21128	ADAM8,ASS1,BIRC3,C1RL,CASP4,CCL2,CCL20,CCL7,CDC42EP4,CFB,CLEC5A,FCGR3A,FGR,GCH1,IFITM3,IL1RAP,IL1RL2,IRAK2,JAK3,LRP8,MARCO,NFKBIA,NLRP6,NOD2,PLSCR1,PTPN2,PTX3,RELB,S100A9,SHMT2,SIGLEC10,SLA,SLAMF8,SLC11A1,TIFA,TLR2,TNFAIP3,TNIP2,TREM1
GO:BP	regulation of epithelial cell proliferation	GO:0050678	FALSE	0.000480256	3.31853	373	340	22	21128	APLN,B4GALT1,BMP2,C5AR1,CCL2,ERRFI1,HIF1A,HMOX1,ITGB3,LAMB1,MYC,NEAT1,NKX3-1,NME1,NOD2,PGF,SIX4,SNAI2,TNFAIP3,VDR,VEGFA,ZNF703
GO:BP	granulocyte chemotaxis	GO:0071621	FALSE	0.000509388	3.29295	131	340	13	21128	C5AR1,CCL2,CCL20,CCL7,CXCL1,CXCL3,CXCL5,CXCL6,IL8,NOD2,S100A9,TREM1,VEGFA
GO:BP	cellular homeostasis	GO:0019725	FALSE	0.000517433	3.28615	790	340	34	21128	ATP1A1,CCL2,CCL7,CCR1,ERN1,FTH1,HIF1A,HK2,HMOX1,ICAM1,IL6,ITGB3,MT1E,MT1G,MT1M,MT1X,MT2A,MYC,P2RY2,P2RY6,S100A9,SLAMF8,SLC11A1,SLC1A3,SLC39A8,SLC4A8,SLC7A11,SLC9A1,SOD2,SOX4,TGM2,TXN,UBASH3B,VDR
GO:BP	negative regulation of cell communication	GO:0010648	FALSE	0.000527581	3.27771	1353	340	48	21128	APCDD1L,APLN,ARNTL,ARRDC3,BCL3,BCL6,BMP2,CHEK2,DDIT4,DNAJB9,ERRFI1,GNAI2,HGF,HIF1A,HIPK2,HMOX1,HSPA5,ICAM1,IER3,IGFBP3,IGFBP5,IL1R2,IL6,IL8,LAPTM5,LIF,MIDN,MMP14,MUC1,MVP,MYC,NFKBIA,NKX3-1,NLRP6,NOD2,PLAUR,PTPN2,RFFL,RGS16,RGS2,SNAI2,SOD2,SPRED3,SPRY4,TLE2,TNFAIP3,UBASH3B,YBX3
GO:BP	wound healing	GO:0042060	FALSE	0.000560745	3.25123	440	340	24	21128	B4GALT1,C1QTNF1,CDKN1A,HIF1A,HMOX1,IL33,IL6,ITGA2,ITGA5,ITGB3,NLRP6,PDGFA,PDGFRA,PLAUR,PLSCR1,SERPINA1,SLC11A1,SLC7A11,TFPI2,THBD,TIMP1,TNFAIP3,UBASH3B,VEGFA
GO:BP	regulation of phosphate metabolic process	GO:0019220	FALSE	0.000580622	3.23611	1400	340	49	21128	ADAM8,BEND3,BMP2,C5AR1,CDKN1A,CHEK2,CKS2,DDIT4,ERN1,ERRFI1,FGR,GADD45B,GNAI2,HGF,HIF1A,HIPK2,HMGA2,IER3,IGFBP3,IL6,ITGA2,ITGA5,ITGB3,LDLR,LIF,LRP8,MARCO,MIDN,MVP,NKX3-1,NOD2,P2RY6,PDGFA,PDGFRA,PGF,PIK3R5,PLAUR,PTPN2,RGS2,SHC1,SLAMF8,SLC11A1,SPRY4,TNFAIP3,TNFAIP8L3,TSLP,TXN,UBASH3B,VEGFA
GO:BP	muscle cell proliferation	GO:0033002	FALSE	0.000581229	3.23565	205	340	16	21128	APLN,BMP2,CDKN1A,ERN1,GNAI2,HGF,HMOX1,IGFBP3,IGFBP5,IL6,ITGA2,ITGB3,P2RY6,PIM1,SOD2,TNFAIP3
GO:BP	positive regulation of macromolecule biosynthetic process	GO:0010557	FALSE	0.000588118	3.23054	1931	340	61	21128	APLN,ARNTL,ARNTL2,BCL3,BMP2,CCL2,CDK2,CEBPB,CEBPD,CHEK2,E2F3,ELL2,ETS2,FOSL1,FOSL2,GLIS3,HGF,HIF1A,HIPK2,HMGA2,HSPA5,IKZF4,IL33,IL6,ITGA2,JAK3,KDM6B,LIF,MAFB,MLLT11,MPV17L2,MUC1,MYC,NAMPT,NFIL3,NFKBIA,NKX3-1,NOD2,PIM1,PLSCR1,PRRX1,RELB,RFC2,SBNO2,SEC14L2,SHC1,SIX4,SLC11A1,SLC6A9,SLC9A1,SOX4,SPP1,TEAD4,TET3,TLR2,TNFSF8,TNIP2,VDR,VEGFA,YBX3,ZNF395
GO:BP	monoatomic ion homeostasis	GO:0050801	FALSE	0.000644249	3.19095	614	340	29	21128	ATP1A1,CA12,CCL7,CCR1,FTH1,GNAI2,HIF1A,HMOX1,ITGB3,MT1E,MT1G,MT1M,MT1X,MT2A,MYC,P2RY2,P2RY6,S100A9,SLAMF8,SLC11A1,SLC1A3,SLC39A8,SLC4A8,SLC9A1,SOD2,STEAP1,TGM2,UBASH3B,VDR
GO:BP	stress response to metal ion	GO:0097501	FALSE	0.000655174	3.18364	18	340	6	21128	HSPA5,MT1E,MT1G,MT1M,MT1X,MT2A
GO:BP	positive regulation of nitric-oxide synthase biosynthetic process	GO:0051770	FALSE	0.000655174	3.18364	18	340	6	21128	CCL2,IL33,JAK3,NAMPT,NOD2,TLR2
GO:BP	regulation of catalytic activity	GO:0050790	FALSE	0.000659081	3.18106	2356	340	70	21128	ADAM8,ADORA3,ALOX5AP,ARRDC3,BCL6,BIRC3,BMP2,C5AR1,CCL2,CCL20,CCL7,CDKN1A,CKS2,CXCL1,ERN1,ERRFI1,FGR,GADD45B,GCH1,GNAI2,HGF,HIF1A,HMGA2,IGFBP3,ITGA2,ITGB3,LAPTM5,LRP8,MAP4K4,MID1IP1,MIDN,MVP,MYC,NKX3-1,NLRP6,NOD2,P2RY6,PDGFA,PDGFRA,PI15,PIK3R5,PLAUR,PLSCR1,PTPN2,PTX3,RASGEF1B,RFC2,RFFL,RGPD2,RGS16,RGS2,S100A9,SERPINA1,SERPINA3,SERPINB1,SERPINB8,SHC1,SLAMF8,SLC11A1,SOD2,SPRY4,TFPI2,TGM2,TIMP1,TNFAI…
GO:BP	cellular chemical homeostasis	GO:0055082	FALSE	0.00070811	3.1499	689	340	31	21128	ATP1A1,CCL7,CCR1,ERN1,FTH1,HIF1A,HK2,HMOX1,ICAM1,ITGB3,MT1E,MT1G,MT1M,MT1X,MT2A,MYC,P2RY2,P2RY6,S100A9,SLAMF8,SLC11A1,SLC1A3,SLC39A8,SLC4A8,SLC7A11,SLC9A1,SOD2,SOX4,TGM2,UBASH3B,VDR
GO:BP	cellular transition metal ion homeostasis	GO:0046916	FALSE	0.000716824	3.14459	113	340	12	21128	FTH1,HIF1A,HMOX1,MT1E,MT1G,MT1M,MT1X,MT2A,MYC,S100A9,SLC11A1,SLC39A8
GO:BP	positive regulation of transcription by RNA polymerase II	GO:0045944	FALSE	0.000739103	3.13129	1242	340	45	21128	ARNTL,ARNTL2,BCL3,BMP2,CEBPB,CEBPD,E2F3,ELL2,ETS2,FOSL1,FOSL2,GLIS3,HGF,HIF1A,HIPK2,HMGA2,HSPA5,IKZF4,IL33,IL6,KDM6B,LIF,MAFB,MUC1,MYC,NAMPT,NFKBIA,NKX3-1,NOD2,PLSCR1,PRRX1,RELB,SBNO2,SIX4,SLC11A1,SLC9A1,SOX4,TEAD4,TET3,TLR2,TNFSF8,TNIP2,VDR,VEGFA,ZNF395
GO:BP	regulation of chemokine production	GO:0032642	FALSE	0.000749963	3.12496	93	340	11	21128	CXCL6,HIF1A,HMOX1,IL1RL1,IL33,IL4R,IL6,NOD2,SNAI2,TLR2,TSLP
GO:BP	chemokine production	GO:0032602	FALSE	0.000749963	3.12496	93	340	11	21128	CXCL6,HIF1A,HMOX1,IL1RL1,IL33,IL4R,IL6,NOD2,SNAI2,TLR2,TSLP
GO:BP	system development	GO:0048731	FALSE	0.000760802	3.11873	3962	340	102	21128	ACVR1B,ADAM8,AKR1C3,ANPEP,APLN,ARNTL,ASS1,B4GALT1,BCL3,BCL6,BHLHE40,BMP2,C1GALT1,C5AR1,CAPG,CCL2,CDKN1A,CEBPB,CHSY1,CLMP,CNTNAP1,CXCL1,DDIT4,ERRFI1,ESM1,ETS2,FAM20C,FGR,FOSL1,HGF,HIF1A,HIPK2,HK2,HMGA2,HMOX1,HSPA5,IGFBP5,IL1RAP,IL33,IL6,IL8,ITGA2,ITGA5,ITGAX,ITGB3,KCNK3,KDM6B,LAMB1,LAMC2,LDLR,LIF,LRP8,LRRC4C,MAFB,MAP4K4,MFAP2,MMP14,MMP19,MYC,NAV1,NDRG1,NKX3-1,NME1,NPY2R,NSDHL,PDGFA,PDGFRA,PGF,PGK1…
GO:BP	tissue development	GO:0009888	FALSE	0.000811167	3.09089	1995	340	62	21128	ACVR1B,AKR1C1,AKR1C3,ARNTL,ARRDC3,B4GALT1,BMP2,C1GALT1,CCR1,CEBPB,CHSY1,CNTNAP1,ERRFI1,ETS2,FAM20C,FGR,FOSL2,HGF,HIF1A,HMGA2,ICAM1,IGFBP5,IL6,ITGA2,ITGA5,ITGAX,ITGB3,KDM6B,LAMB1,LAMC2,LIF,MAFB,MMP14,MYC,NKX3-1,NSDHL,PDGFA,PDGFRA,PGK1,PIM1,PLEKHA4,PRRX1,PUS7,RGS2,RIPK4,SBNO2,SIX4,SLC20A1,SLC7A11,SLC9A1,SNAI2,SOX4,SPP1,SPRED3,ST14,TGM2,TIMP1,TUBB3,VDR,VEGFA,YBX3,ZNF703
GO:BP	regulation of leukocyte activation	GO:0002694	FALSE	0.000841332	3.07503	658	340	30	21128	ADAM8,BCL6,CCL2,CDKN1A,CEBPB,FCGR3A,FGR,HMOX1,IL15RA,IL1RL1,IL1RL2,IL33,IL4R,IL6,JAK3,KLHL25,LAPTM5,LDLR,MMP14,NOD2,PLSCR1,PNP,PTPN2,SLAMF8,SOX4,TNFAIP3,TNFRSF9,TNFSF8,TNIP2,TSLP
GO:BP	positive regulation of epithelial cell proliferation	GO:0050679	FALSE	0.000860228	3.06539	211	340	16	21128	APLN,B4GALT1,BMP2,C5AR1,HIF1A,HMOX1,ITGB3,LAMB1,MYC,NEAT1,NME1,NOD2,PGF,TNFAIP3,VEGFA,ZNF703
GO:BP	negative regulation of macromolecule metabolic process	GO:0010605	FALSE	0.00091682	3.03772	3360	340	90	21128	ACVR1B,APLN,ARNTL,BAZ1A,BCL3,BCL6,BEND3,BHLHE40,BIRC3,BMP2,CCR1,CDK2,CDKN1A,CEBPB,CEBPD,DDIT4,EIF4EBP1,ERN1,ERRFI1,ETS2,GADD45B,GLIS3,GNAI2,HGF,HIF1A,HIPK2,HMGA2,HMOX1,HSPA8,IGFBP3,IGFBP5,IKZF4,IL1R2,IL1RL1,IL33,IL6,IL8,ITGB3,JAK3,LAPTM5,LDLR,LMNB1,MAFB,MRTO4,MSR1,MUC1,MVP,MYC,NEAT1,NFIL3,NKX3-1,NLRP6,NOD2,PHC2,PI15,PLAUR,PLEKHN1,PRRX1,PTPN2,PTX3,PUS7,RELB,RFFL,RGS2,SBNO2,SERPINA1,SERPINA3,SERPIN…
GO:BP	transmembrane receptor protein tyrosine kinase signaling pathway	GO:0007169	FALSE	0.000960862	3.01734	626	340	29	21128	ADAMTS3,APLN,BMP2,DDIT4,ERRFI1,ESM1,FAM20C,FGR,GNAI2,HGF,HIF1A,IGFBP3,IGFBP5,ITGA5,ITGB3,JAK3,MVP,NKX3-1,PDGFA,PDGFRA,PGF,PLAUR,PTPN2,SH2B2,SHC1,SLA,SPRY4,UBASH3B,VEGFA
GO:BP	lymphocyte differentiation	GO:0030098	FALSE	0.00102174	2.99066	422	340	23	21128	ADAM8,BCL3,BCL6,CTSL,DNAJB9,IL15RA,IL1RL2,IL4R,IL6,JAK3,KLHL25,MAFB,MMP14,NFIL3,PNP,PTPN2,RELB,SLAMF8,SOX4,ST3GAL1,TNFRSF9,TNFSF8,TRAF3IP2
GO:BP	cellular response to chemical stress	GO:0062197	FALSE	0.00125094	2.90276	332	340	20	21128	AKR1C3,ARNTL,ERN1,ERRFI1,GCH1,HGF,HIF1A,HMOX1,IL6,KDM6B,MAPK13,MMP3,PDGFRA,RELB,SLC2A1,SLC7A11,SOD2,TNFAIP3,TXN,YBX3
GO:BP	response to tumor necrosis factor	GO:0034612	FALSE	0.00130187	2.88543	245	340	17	21128	ASS1,BIRC3,CASP4,CCL2,CCL20,CCL7,GCH1,IL8,LAPTM5,NFKBIA,NKX3-1,PTPN2,RFFL,TNFAIP3,TRAF1,TRAF3IP2,YBX3
GO:BP	leukocyte apoptotic process	GO:0071887	FALSE	0.00138303	2.85917	120	340	12	21128	ADAM8,BCL3,BCL6,CHEK2,CTSL,HIF1A,IL6,JAK3,NOD2,SLC7A11,ST3GAL1,TRAF3IP2
GO:BP	response to reactive oxygen species	GO:0000302	FALSE	0.00156543	2.80537	194	340	15	21128	AKR1C3,ERN1,FOSL1,GCH1,HGF,HIF1A,HMOX1,IL6,KDM6B,MAPK13,NUDT15,PDGFRA,SOD2,TNFAIP3,TXN
GO:BP	T-helper 1 type immune response	GO:0042088	TRUE	0.00158619	2.79964	46	340	8	21128	BCL3,IL1R1,IL1RL1,IL33,IL4R,JAK3,RELB,SLC11A1
GO:BP	regulation of cell development	GO:0060284	FALSE	0.00160792	2.79374	830	340	34	21128	ACVR1B,ADAM8,ARNTL,BCL6,BHLHE40,BMP2,CCR1,CEBPB,HIF1A,IL15RA,IL1RL2,IL33,IL4R,IL6,JAK3,KLHL25,LDLR,LIF,LRP8,MAFB,MMP14,MYC,NFKBIA,PNP,PTPN2,SLAMF8,SLC7A5,SNAI2,SOX4,SPP1,TGM2,TLR2,UBASH3B,VEGFA
GO:BP	cell-cell adhesion	GO:0098609	FALSE	0.00161445	2.79198	948	340	37	21128	ADAM8,ASS1,BCL6,BMP2,C1QTNF1,CCL2,CEBPB,ICAM1,IL1RAP,IL1RL2,IL4R,IL6,ITGA2,ITGA5,ITGAX,ITGB3,JAK3,KLHL25,LAMB1,LAPTM5,LRRC4C,NOD2,OLR1,PDGFRA,PLAUR,PNP,PTPN2,S100A9,SERPINB8,SHC1,SLC39A8,SLC7A11,SOX4,UBASH3B,VEGFA,VMP1,ZNF703
GO:BP	positive regulation of protein metabolic process	GO:0051247	FALSE	0.00180772	2.74287	1499	340	50	21128	ADAM8,ARNTL,ARRDC3,BCL3,BCL6,BIRC3,BMP2,CDKN1A,CHEK2,CKS2,ERN1,HGF,HIPK2,HMGA2,HSPA5,IER3,IL33,IL6,ITGA2,ITGA5,ITGB3,LAPTM5,LDLR,LIF,LPCAT3,LRP8,MARCO,MMP14,MPV17L2,MUC1,MYC,NFKBIA,NKX3-1,NLRP6,NNMT,NOD2,PDGFA,PGF,PIK3R5,PLAUR,S100A9,SLC11A1,SLC6A9,SNAI2,SOX4,TNFAIP3,TSLP,TXN,VEGFA,YBX3
GO:BP	animal organ development	GO:0048513	FALSE	0.0018269	2.73829	3109	340	84	21128	ACVR1B,AKR1C3,APLN,ARNTL,ARRDC3,ASS1,BCL3,BMP2,C1GALT1,CCL2,CCR1,CDKN1A,CEBPB,CEBPD,CHSY1,CNTNAP1,DDIT4,ERRFI1,FAM20C,FGR,FOSL1,FOSL2,HGF,HIF1A,HIPK2,HK2,HMGA2,HMOX1,HSPA5,IGFBP5,IL6,IL8,ITGA2,ITGAX,ITGB3,KCNK3,KDM6B,LAMB1,LAMC2,LIF,LRP8,MAFB,MFAP2,MMP14,MMP19,MYC,NKX3-1,NME1,NNMT,NPY2R,NSDHL,PDGFA,PDGFRA,PGF,PIM1,PLEKHA4,PRRX1,PTX3,RGS2,SBNO2,SHC1,SIX4,SLC20A1,SLC2A1,SLC7A11,SLC7A5,SLC9A1,SNAI2,…
GO:BP	nitric-oxide synthase biosynthetic process	GO:0051767	FALSE	0.00183855	2.73552	21	340	6	21128	CCL2,IL33,JAK3,NAMPT,NOD2,TLR2
GO:BP	regulation of nitric-oxide synthase biosynthetic process	GO:0051769	FALSE	0.00183855	2.73552	21	340	6	21128	CCL2,IL33,JAK3,NAMPT,NOD2,TLR2
GO:BP	regulation of phosphorylation	GO:0042325	FALSE	0.00195005	2.70995	1244	340	44	21128	ADAM8,BMP2,C5AR1,CDKN1A,CHEK2,CKS2,DDIT4,ERN1,ERRFI1,FGR,GADD45B,HGF,HIF1A,HIPK2,HMGA2,IER3,IGFBP3,IL6,ITGA5,ITGB3,LIF,LRP8,MARCO,MIDN,MVP,NKX3-1,NOD2,PDGFA,PDGFRA,PGF,PIK3R5,PLAUR,PTPN2,RGS2,SHC1,SLAMF8,SLC11A1,SPRY4,TNFAIP3,TNFAIP8L3,TSLP,TXN,UBASH3B,VEGFA
GO:BP	lymphocyte activation	GO:0046649	FALSE	0.00199673	2.69968	838	340	34	21128	ADAM8,BCL3,BCL6,CCL2,CDKN1A,CEBPB,CTSL,DNAJB9,FCGR3A,FGR,ICAM1,IL15RA,IL1RL2,IL4R,IL6,JAK3,KLHL25,LAPTM5,MAFB,MMP14,NFIL3,NOD2,PNP,PTPN2,RELB,SLAMF8,SLC11A1,SOX4,ST3GAL1,TNFAIP3,TNFRSF9,TNFSF8,TNIP2,TRAF3IP2
GO:BP	cellular response to tumor necrosis factor	GO:0071356	FALSE	0.00203693	2.69102	225	340	16	21128	ASS1,BIRC3,CASP4,CCL2,CCL20,CCL7,IL8,LAPTM5,NFKBIA,NKX3-1,PTPN2,RFFL,TNFAIP3,TRAF1,TRAF3IP2,YBX3
GO:BP	positive regulation of apoptotic process	GO:0043065	FALSE	0.00219242	2.65908	509	340	25	21128	ADAM8,AKR1C3,B4GALT1,BCL6,BMP2,CCL2,CHEK2,E2F3,FOSL1,GADD45B,HMOX1,IGFBP3,IL6,MLLT11,MYC,NKX3-1,PHLDA1,PLEKHN1,PTPN2,S100A9,SLC9A1,SOD2,SOX4,TGM2,VDR
GO:BP	regulation of anatomical structure morphogenesis	GO:0022603	FALSE	0.00226857	2.64425	882	340	35	21128	BCL6,BMP2,C5AR1,CCL2,CCL7,CDC42EP4,ERMN,FGR,HGF,HIF1A,HIPK2,HK2,HMGA2,HMOX1,IL6,IL8,ITGA5,ITGAX,ITGB3,LIF,LRP8,LRRC4C,PDGFA,PGF,PGK1,PLEKHA4,RND1,RND3,SIX4,SNAI2,SPP1,THBS2,TMEM2,TNFAIP3,VEGFA
GO:BP	cellular monoatomic ion homeostasis	GO:0006873	FALSE	0.00227208	2.64358	510	340	25	21128	ATP1A1,CCL7,CCR1,FTH1,HIF1A,HMOX1,ITGB3,MT1E,MT1G,MT1M,MT1X,MT2A,MYC,P2RY2,P2RY6,S100A9,SLAMF8,SLC11A1,SLC1A3,SLC39A8,SLC4A8,SLC9A1,TGM2,UBASH3B,VDR
GO:BP	regulation of hemopoiesis	GO:1903706	FALSE	0.00237806	2.62378	410	340	22	21128	ACVR1B,ADAM8,BCL6,CCR1,CEBPB,HIF1A,IL15RA,IL1RL2,IL4R,JAK3,KLHL25,LIF,MAFB,MMP14,MYC,NFKBIA,PNP,PTPN2,SLAMF8,SNAI2,SOX4,UBASH3B
GO:BP	inorganic ion homeostasis	GO:0098771	FALSE	0.00252225	2.59821	548	340	26	21128	ATP1A1,CA12,CCL7,CCR1,FTH1,GNAI2,HIF1A,HMOX1,ITGB3,MT1E,MT1G,MT1M,MT1X,MT2A,MYC,P2RY6,S100A9,SLC11A1,SLC1A3,SLC39A8,SLC9A1,SOD2,STEAP1,TGM2,UBASH3B,VDR
GO:BP	macrophage activation	GO:0042116	FALSE	0.00258172	2.58809	105	340	11	21128	C5AR1,FCGR3A,IL1RL1,IL33,IL4R,IL6,LDLR,SBNO2,SLC11A1,TLR2,TNIP2
GO:BP	acute-phase response	GO:0006953	FALSE	0.00262877	2.58025	49	340	8	21128	ASS1,CD163,CEBPB,IL6,ORM2,PLSCR1,SERPINA1,SERPINA3
GO:BP	negative regulation of cell adhesion	GO:0007162	FALSE	0.00263311	2.57953	287	340	18	21128	ASS1,BCL6,BMP2,C1QTNF1,CEBPB,IL4R,JAK3,LAPTM5,MAP4K4,MMP14,MUC1,PTPN2,RND1,SNAI2,SPRY4,UBASH3B,VEGFA,ZNF703
GO:BP	regulation of angiogenesis	GO:0045765	FALSE	0.00263311	2.57953	287	340	18	21128	C5AR1,HGF,HIF1A,HIPK2,HK2,HMGA2,HMOX1,IL6,IL8,ITGA5,ITGAX,ITGB3,PGF,PGK1,THBS2,TMEM2,TNFAIP3,VEGFA
GO:BP	regulation of macromolecule biosynthetic process	GO:0010556	FALSE	0.00280543	2.552	3965	340	100	21128	ACVR1B,ADAM8,ADORA3,APLN,ARNTL,ARNTL2,BAZ1A,BCL3,BCL6,BEND3,BHLHE40,BMP2,CCL2,CDK18,CDK2,CDKN1A,CEBPB,CEBPD,CHEK2,CKS2,DIO2,E2F3,EIF4EBP1,ELL2,ETS2,FOSL1,FOSL2,GLIS3,HGF,HIF1A,HIPK2,HMGA2,HMOX1,HSPA5,HSPA8,IGFBP5,IKZF4,IL1RAP,IL33,IL6,IL8,IRAK2,ITGA2,JAK3,KDM6B,KLF17,KLHL25,LIF,LRP8,MAFB,MLLT11,MPV17L2,MUC1,MYC,NAMPT,NFIL3,NFKBIA,NKX3-1,NOD2,PHC2,PIM1,PKNOX2,PLEKHN1,PLSCR1,POLR2L,PRRX1,PTPN2,PUS7…
GO:BP	positive regulation of nucleic acid-templated transcription	GO:1903508	FALSE	0.00292572	2.53377	1703	340	54	21128	APLN,ARNTL,ARNTL2,BCL3,BMP2,CDK2,CEBPB,CEBPD,CHEK2,E2F3,ELL2,ETS2,FOSL1,FOSL2,GLIS3,HGF,HIF1A,HIPK2,HMGA2,HSPA5,IKZF4,IL33,IL6,KDM6B,LIF,MAFB,MLLT11,MUC1,MYC,NAMPT,NFIL3,NFKBIA,NKX3-1,NOD2,PIM1,PLSCR1,PRRX1,RELB,SBNO2,SEC14L2,SHC1,SIX4,SLC11A1,SLC9A1,SOX4,SPP1,TEAD4,TET3,TLR2,TNFSF8,TNIP2,VDR,VEGFA,ZNF395
GO:BP	positive regulation of DNA-templated transcription	GO:0045893	FALSE	0.00292572	2.53377	1703	340	54	21128	APLN,ARNTL,ARNTL2,BCL3,BMP2,CDK2,CEBPB,CEBPD,CHEK2,E2F3,ELL2,ETS2,FOSL1,FOSL2,GLIS3,HGF,HIF1A,HIPK2,HMGA2,HSPA5,IKZF4,IL33,IL6,KDM6B,LIF,MAFB,MLLT11,MUC1,MYC,NAMPT,NFIL3,NFKBIA,NKX3-1,NOD2,PIM1,PLSCR1,PRRX1,RELB,SBNO2,SEC14L2,SHC1,SIX4,SLC11A1,SLC9A1,SOX4,SPP1,TEAD4,TET3,TLR2,TNFSF8,TNIP2,VDR,VEGFA,ZNF395
GO:BP	regulation of lipid storage	GO:0010883	FALSE	0.00308602	2.5106	50	340	8	21128	ABCA1,HILPDA,IL6,ITGB3,MSR1,NFKBIA,PLIN2,PTPN2
GO:BP	positive regulation of RNA metabolic process	GO:0051254	FALSE	0.003099	2.50878	1843	340	57	21128	APLN,ARNTL,ARNTL2,BCL3,BMP2,CDK2,CEBPB,CEBPD,CHEK2,E2F3,ELL2,ERN1,ETS2,FOSL1,FOSL2,GLIS3,HGF,HIF1A,HIPK2,HMGA2,HSPA5,HSPA8,IKZF4,IL33,IL6,KDM6B,LIF,MAFB,MLLT11,MUC1,MYC,NAMPT,NFIL3,NFKBIA,NKX3-1,NOD2,PIM1,PLEKHN1,PLSCR1,PRRX1,RELB,SBNO2,SEC14L2,SHC1,SIX4,SLC11A1,SLC9A1,SOX4,SPP1,TEAD4,TET3,TLR2,TNFSF8,TNIP2,VDR,VEGFA,ZNF395
GO:BP	fibroblast proliferation	GO:0048144	TRUE	0.00312026	2.50581	107	340	11	21128	CDKN1A,CKS2,FOSL2,FTH1,IFI30,ITGB3,LIF,MYC,PDGFA,PDGFRA,SOD2
GO:BP	regulation of vasculature development	GO:1901342	FALSE	0.00321173	2.49326	291	340	18	21128	C5AR1,HGF,HIF1A,HIPK2,HK2,HMGA2,HMOX1,IL6,IL8,ITGA5,ITGAX,ITGB3,PGF,PGK1,THBS2,TMEM2,TNFAIP3,VEGFA
GO:BP	positive regulation of RNA biosynthetic process	GO:1902680	FALSE	0.00331434	2.4796	1710	340	54	21128	APLN,ARNTL,ARNTL2,BCL3,BMP2,CDK2,CEBPB,CEBPD,CHEK2,E2F3,ELL2,ETS2,FOSL1,FOSL2,GLIS3,HGF,HIF1A,HIPK2,HMGA2,HSPA5,IKZF4,IL33,IL6,KDM6B,LIF,MAFB,MLLT11,MUC1,MYC,NAMPT,NFIL3,NFKBIA,NKX3-1,NOD2,PIM1,PLSCR1,PRRX1,RELB,SBNO2,SEC14L2,SHC1,SIX4,SLC11A1,SLC9A1,SOX4,SPP1,TEAD4,TET3,TLR2,TNFSF8,TNIP2,VDR,VEGFA,ZNF395
GO:BP	cellular response to zinc ion	GO:0071294	TRUE	0.00332851	2.47775	23	340	6	21128	KCNK3,MT1E,MT1G,MT1M,MT1X,MT2A
GO:BP	intrinsic apoptotic signaling pathway in response to DNA damage	GO:0008630	FALSE	0.00342481	2.46536	108	340	11	21128	BCL2A1,BCL3,CDKN1A,CHEK2,DDIT4,HIPK2,HMOX1,IER3,MUC1,SNAI2,SOD2
GO:BP	cellular response to cadmium ion	GO:0071276	TRUE	0.003671	2.43522	36	340	7	21128	AKR1C3,HMOX1,MT1E,MT1G,MT1M,MT1X,MT2A
GO:BP	positive regulation of chemokine production	GO:0032722	FALSE	0.00394704	2.40373	69	340	9	21128	HIF1A,HMOX1,IL1RL1,IL33,IL4R,IL6,NOD2,TLR2,TSLP
GO:BP	regulation of protein modification process	GO:0031399	FALSE	0.00395223	2.40316	1540	340	50	21128	ADAM8,ARNTL,ARRDC3,BCL6,BIRC3,BMP2,C5AR1,CDKN1A,CHEK2,CKS2,DDIT4,ERN1,ERRFI1,FGR,GADD45B,GNAI2,HGF,HIF1A,HIPK2,HMGA2,HSPA5,IGFBP3,IL6,ITGA5,ITGB3,LAPTM5,LIF,LRP8,MARCO,MUC1,MVP,NKX3-1,NNMT,NOD2,PDGFA,PGF,PIK3R5,PLAUR,PTPN2,RGS2,SHC1,SLC11A1,SNAI2,SOX4,SPRY4,TNFAIP3,TSLP,TXN,UBASH3B,VEGFA
GO:BP	metal ion homeostasis	GO:0055065	FALSE	0.00396804	2.40142	526	340	25	21128	ATP1A1,CCL7,CCR1,FTH1,GNAI2,HIF1A,HMOX1,ITGB3,MT1E,MT1G,MT1M,MT1X,MT2A,MYC,P2RY6,S100A9,SLC11A1,SLC1A3,SLC39A8,SLC9A1,SOD2,STEAP1,TGM2,UBASH3B,VDR
GO:BP	cellular metal ion homeostasis	GO:0006875	FALSE	0.00398113	2.39999	423	340	22	21128	ATP1A1,CCL7,CCR1,FTH1,HIF1A,HMOX1,ITGB3,MT1E,MT1G,MT1M,MT1X,MT2A,MYC,P2RY6,S100A9,SLC11A1,SLC1A3,SLC39A8,SLC9A1,TGM2,UBASH3B,VDR
GO:BP	fat cell differentiation	GO:0045444	FALSE	0.0040435	2.39324	237	340	16	21128	ARNTL,BMP2,CCDC71L,CEBPB,CEBPD,DIO2,HMGA2,IL6,MAFB,MEDAG,PDGFRA,PIM1,RGS2,SH2B2,SNAI2,SOD2
GO:BP	regulation of cellular response to stress	GO:0080135	FALSE	0.00418143	2.37867	711	340	30	21128	BMP2,CHEK2,DNAJB9,ERN1,GADD45B,GCH1,HGF,HIF1A,HIPK2,HMGA2,HSPA5,IER3,LPCAT3,MAP4K4,MMP3,MUC1,MYC,NKX3-1,NOD2,PRRX1,PTPN2,SLC7A11,SNAI2,SOD2,SOX4,SPP1,TRAF1,TXN,VEGFA,YBX3
GO:BP	amino acid import across plasma membrane	GO:0089718	TRUE	0.00420633	2.3761	52	340	8	21128	RGS2,SLC1A3,SLC38A5,SLC43A2,SLC6A6,SLC6A9,SLC7A11,SLC7A5
GO:BP	response to zinc ion	GO:0010043	FALSE	0.00420633	2.3761	52	340	8	21128	ASS1,KCNK3,MT1E,MT1G,MT1M,MT1X,MT2A,SOD2
GO:BP	cellular response to external stimulus	GO:0071496	FALSE	0.00433524	2.36299	328	340	19	21128	AKR1C3,CD68,CDKN1A,FOSL1,HMOX1,HSPA5,HSPA8,IL33,ITGA2,ITGB3,NUDT15,PIM1,PLIN2,SLC2A1,SLC7A5,SLC9A1,SNAI2,UPP1,VDR
GO:BP	regulation of small molecule metabolic process	GO:0062012	FALSE	0.00433524	2.36299	328	340	19	21128	AKR1C3,BEND3,BMP2,C1QTNF1,DDIT4,HIF1A,IER3,IGFBP3,KLHL25,LDLR,LPCAT3,MID1IP1,MIDN,NNMT,P2RY6,PTPN2,SEC14L2,SLC7A11,SNAI2
GO:BP	detoxification of copper ion	GO:0010273	FALSE	0.00465535	2.33205	14	340	5	21128	MT1E,MT1G,MT1M,MT1X,MT2A
GO:BP	stress response to copper ion	GO:1990169	FALSE	0.00465535	2.33205	14	340	5	21128	MT1E,MT1G,MT1M,MT1X,MT2A
GO:BP	chemokine-mediated signaling pathway	GO:0070098	FALSE	0.00466714	2.33095	90	340	10	21128	CCL2,CCL20,CCL7,CCR1,CXCL1,CXCL3,CXCL5,CXCL6,HIF1A,IL8
GO:BP	regulation of fibroblast proliferation	GO:0048145	FALSE	0.00466714	2.33095	90	340	10	21128	CDKN1A,FOSL2,FTH1,IFI30,ITGB3,LIF,MYC,PDGFA,PDGFRA,SOD2
GO:BP	monoatomic cation homeostasis	GO:0055080	FALSE	0.00483494	2.31561	604	340	27	21128	ATP1A1,CCL7,CCR1,FTH1,GNAI2,HIF1A,HMOX1,ITGB3,MT1E,MT1G,MT1M,MT1X,MT2A,MYC,P2RY6,S100A9,SLAMF8,SLC11A1,SLC1A3,SLC39A8,SLC4A8,SLC9A1,SOD2,STEAP1,TGM2,UBASH3B,VDR
GO:BP	negative regulation of smooth muscle cell proliferation	GO:0048662	FALSE	0.00488534	2.31111	53	340	8	21128	APLN,BMP2,CDKN1A,HMOX1,IGFBP3,IGFBP5,SOD2,TNFAIP3
GO:BP	detoxification	GO:0098754	FALSE	0.00489125	2.31058	135	340	12	21128	ADH4,ALOX5AP,GCH1,MT1E,MT1G,MT1M,MT1X,MT2A,PIM1,S100A9,SOD2,TXN
GO:BP	homeostasis of number of cells	GO:0048872	FALSE	0.00495655	2.30482	300	340	18	21128	ACVR1B,BCL6,CXCL6,HIF1A,HIPK2,HMOX1,IL6,JAK3,LPCAT3,MAFB,NLRP6,PTPN2,SH2B2,SLC7A11,SOX4,TNFAIP3,TRAF3IP2,VEGFA
GO:BP	type 2 immune response	GO:0042092	FALSE	0.00539868	2.26771	38	340	7	21128	BCL3,BCL6,IL33,IL4R,IL6,NOD2,TRAF3IP2
GO:BP	negative regulation of T-helper 1 type immune response	GO:0002826	FALSE	0.0055494	2.25575	7	340	4	21128	IL1RL1,IL33,IL4R,JAK3
GO:BP	cellular monoatomic cation homeostasis	GO:0030003	FALSE	0.00562717	2.24971	501	340	24	21128	ATP1A1,CCL7,CCR1,FTH1,HIF1A,HMOX1,ITGB3,MT1E,MT1G,MT1M,MT1X,MT2A,MYC,P2RY6,S100A9,SLAMF8,SLC11A1,SLC1A3,SLC39A8,SLC4A8,SLC9A1,TGM2,UBASH3B,VDR
GO:BP	cellular nitrogen compound biosynthetic process	GO:0044271	FALSE	0.00595963	2.22478	4890	340	116	21128	ACVR1B,ADAM8,ADK,ADORA3,AKR1C3,APLN,ARNTL,ARNTL2,ASS1,BAZ1A,BCL3,BCL6,BEND3,BHLHE40,BMP2,C5AR1,CDK18,CDK2,CDKN1A,CEBPB,CEBPD,CHEK2,CKS2,DIO2,E2F3,EIF4EBP1,ELL2,ETS2,FOSL1,FOSL2,GCH1,GLIS3,HGF,HIF1A,HIPK2,HMGA2,HMOX1,HSPA5,HSPA8,IGFBP5,IKZF4,IL1RAP,IL33,IL6,IL8,IRAK2,ITGA2,KDM6B,KLF17,KLHL25,LIF,LRP8,MAFB,MLLT11,MPV17L2,MUC1,MYC,NAMPT,NANS,NFIL3,NFKBIA,NKX3-1,NME1,NNMT,NOD2,PHC2,PIM1,PKNOX2,PLEKHN…
GO:BP	negative regulation of cell activation	GO:0050866	FALSE	0.00604347	2.21871	216	340	15	21128	BCL6,C1QTNF1,CEBPB,FGR,HMOX1,IL4R,JAK3,LAPTM5,LDLR,PDGFA,PDGFRA,PTPN2,THBD,TNFAIP3,UBASH3B
GO:BP	regulation of DNA-binding transcription factor activity	GO:0051090	FALSE	0.00605229	2.21808	434	340	22	21128	ADAM8,ADORA3,BCL3,BHLHE40,BMP2,FOSL1,HIPK2,HMOX1,IL1RAP,IL6,IRAK2,LRP8,NFKBIA,NKX3-1,NOD2,PIM1,RIPK4,S100A9,TLR2,TNFAIP3,TRAF1,VEGFA
GO:BP	regulation of response to cytokine stimulus	GO:0060759	FALSE	0.00623235	2.20535	163	340	13	21128	CASP4,HIF1A,IL1R1,IL1R2,IL6,IRAK2,LAPTM5,NLRP6,PTPN2,RFFL,TLR2,TNFAIP3,TSLP
GO:BP	cellular zinc ion homeostasis	GO:0006882	FALSE	0.00648941	2.18779	39	340	7	21128	MT1E,MT1G,MT1M,MT1X,MT2A,S100A9,SLC39A8
GO:BP	embryo implantation	GO:0007566	FALSE	0.0065261	2.18535	55	340	8	21128	ACVR1B,ITGB3,LIF,SPP1,TEAD4,TIMP1,VEGFA,VMP1
GO:BP	positive regulation of angiogenesis	GO:0045766	FALSE	0.00713935	2.14634	165	340	13	21128	C5AR1,HGF,HIF1A,HIPK2,HK2,HMGA2,HMOX1,IL8,ITGA5,ITGAX,ITGB3,PGF,VEGFA
GO:BP	positive regulation of vasculature development	GO:1904018	FALSE	0.00713935	2.14634	165	340	13	21128	C5AR1,HGF,HIF1A,HIPK2,HK2,HMGA2,HMOX1,IL8,ITGA5,ITGAX,ITGB3,PGF,VEGFA
GO:BP	positive regulation of catalytic activity	GO:0043085	FALSE	0.00764489	2.11663	1181	340	41	21128	ADAM8,ADORA3,ARRDC3,BMP2,C5AR1,CCL2,CCL20,CCL7,CDKN1A,CKS2,ERN1,FGR,GCH1,GNAI2,HIF1A,HMGA2,ITGA2,ITGB3,LAPTM5,LRP8,MAP4K4,MID1IP1,MYC,NKX3-1,NLRP6,NOD2,P2RY6,PDGFA,PDGFRA,PIK3R5,PLSCR1,RASGEF1B,RFC2,RGS16,S100A9,SLC11A1,TGM2,TNFAIP8L3,TXN,VDR,VEGFA
GO:BP	cellular response to hypoxia	GO:0071456	FALSE	0.00832451	2.07964	142	340	12	21128	ADAM8,HIF1A,HILPDA,HIPK2,HMOX1,KCNK3,MYC,NDRG1,NKX3-1,PGK1,SLC9A1,VEGFA
GO:BP	myeloid cell differentiation	GO:0030099	FALSE	0.00842631	2.07436	409	340	21	21128	ACVR1B,BCL6,BMP2,CCR1,CEBPB,CLEC5A,FAM20C,HIF1A,HIPK2,JAK3,LIF,MAFB,MT1G,MYC,NFKBIA,PTPN2,RELB,SBNO2,TLR2,UBASH3B,VEGFA
GO:BP	negative regulation of cytokine production	GO:0001818	FALSE	0.00855151	2.06796	281	340	17	21128	BCL3,BCL6,ERRFI1,HGF,HMOX1,IL1R2,IL1RL1,IL33,IL6,JAK3,LAPTM5,NLRP6,NOD2,RELB,SERPINB1,SLC11A1,TNFAIP3
GO:BP	zinc ion homeostasis	GO:0055069	FALSE	0.00922709	2.03494	41	340	7	21128	MT1E,MT1G,MT1M,MT1X,MT2A,S100A9,SLC39A8
GO:BP	interleukin-1-mediated signaling pathway	GO:0070498	FALSE	0.00924416	2.03413	27	340	6	21128	IL1R1,IL1R2,IL1RL2,IL6,IRAK2,TNIP2
GO:BP	positive regulation of nucleobase-containing compound metabolic process	GO:0045935	FALSE	0.00934856	2.02926	2051	340	60	21128	APLN,ARNTL,ARNTL2,BAZ1A,BCL3,BEND3,BMP2,CDK2,CEBPB,CEBPD,CHEK2,E2F3,ELL2,ERN1,ETS2,FOSL1,FOSL2,GLIS3,HGF,HIF1A,HIPK2,HMGA2,HSPA5,HSPA8,IKZF4,IL33,IL6,KDM6B,LIF,MAFB,MLLT11,MUC1,MYC,NAMPT,NFIL3,NFKBIA,NKX3-1,NOD2,PIM1,PLEKHN1,PLSCR1,PRRX1,RELB,RFC2,SBNO2,SEC14L2,SHC1,SIX4,SLC11A1,SLC9A1,SOX4,SPP1,TEAD4,TET3,TLR2,TNFSF8,TNIP2,VDR,VEGFA,ZNF395
GO:BP	enzyme-linked receptor protein signaling pathway	GO:0007167	FALSE	0.00967997	2.01413	982	340	36	21128	ACVR1B,ADAMTS3,APLN,BMP2,DDIT4,ERRFI1,ESM1,FAM20C,FGR,GNAI2,HGF,HIF1A,HIPK2,HSPA5,IGFBP3,IGFBP5,ITGA5,ITGB3,JAK3,LIF,MVP,NKX3-1,OSMR,PDGFA,PDGFRA,PGF,PLAUR,PTPN2,SH2B2,SHC1,SLA,SPRED3,SPRY4,UBASH3B,VEGFA,ZNF703
GO:BP	regulation of leukocyte differentiation	GO:1902105	FALSE	0.0102818	1.98793	316	340	18	21128	ADAM8,BCL6,CCR1,CEBPB,IL15RA,IL1RL2,IL4R,JAK3,KLHL25,LIF,MAFB,MMP14,MYC,PNP,PTPN2,SLAMF8,SOX4,UBASH3B
GO:BP	interleukin-33-mediated signaling pathway	GO:0038172	FALSE	0.0103281	1.98598	3	340	3	21128	IL1RAP,IL1RL1,IL33
GO:BP	positive regulation of transport	GO:0051050	FALSE	0.010844	1.96481	905	340	34	21128	ABCA1,ADAM8,APLN,BMP2,C1QTNF1,CCL2,CCR1,CEBPB,FGR,GLRX,GNAI2,HIF1A,IL15RA,IL4R,ITGA2,JAK3,KCNK3,LPCAT3,NFKBIA,NKX3-1,NOD2,P2RY2,P2RY6,PTX3,SLC11A1,SLC4A8,SLC7A5,SLC9A1,SOX4,SPP1,STX1A,TLR2,VEGFA,VMP1
GO:BP	response to chemokine	GO:1990868	FALSE	0.0111853	1.95135	99	340	10	21128	CCL2,CCL20,CCL7,CCR1,CXCL1,CXCL3,CXCL5,CXCL6,HIF1A,IL8
GO:BP	cellular response to chemokine	GO:1990869	FALSE	0.0111853	1.95135	99	340	10	21128	CCL2,CCL20,CCL7,CCR1,CXCL1,CXCL3,CXCL5,CXCL6,HIF1A,IL8
GO:BP	response to cadmium ion	GO:0046686	FALSE	0.0112395	1.94925	59	340	8	21128	AKR1C3,HMOX1,MT1E,MT1G,MT1M,MT1X,MT2A,SOD2
GO:BP	negative regulation of protein metabolic process	GO:0051248	FALSE	0.0114485	1.94125	1031	340	37	21128	BIRC3,BMP2,CDKN1A,DDIT4,EIF4EBP1,ERRFI1,GADD45B,GNAI2,HGF,HIPK2,IGFBP3,IGFBP5,IL1R2,ITGB3,JAK3,LDLR,MVP,PI15,PLAUR,PLEKHN1,PTPN2,PTX3,PUS7,RFFL,RGS2,SERPINA1,SERPINA3,SERPINB1,SERPINB8,SHMT2,SOX4,SPRY4,TFPI2,TIMP1,TNFAIP3,UBASH3B,VEGFA
GO:BP	organic cyclic compound biosynthetic process	GO:1901362	FALSE	0.0120373	1.91947	4307	340	104	21128	ACVR1B,ADAM8,ADK,ADORA3,AKR1C3,APLN,ARNTL,ARNTL2,ATP1A1,BAZ1A,BCL3,BCL6,BEND3,BHLHE40,BMP2,C5AR1,CDK18,CDK2,CDKN1A,CEBPB,CEBPD,CHEK2,CKS2,E2F3,ELL2,ETS2,FOSL1,FOSL2,GCH1,GLIS3,HGF,HIF1A,HIPK2,HMGA2,HMOX1,HSPA5,HSPA8,IKZF4,IL1RAP,IL33,IL6,IL8,IRAK2,KDM6B,KLF17,LIF,LPCAT3,LRP8,MAFB,MLLT11,MUC1,MYC,NAMPT,NANS,NFIL3,NFKBIA,NKX3-1,NME1,NNMT,NOD2,NSDHL,PHC2,PIM1,PKNOX2,PLSCR1,PNP,POLR2H,POLR2L,PRRX1,PT…
GO:BP	biological process involved in symbiotic interaction	GO:0044403	FALSE	0.0122432	1.9121	320	340	18	21128	ANPEP,CLEC5A,CTSL,CXCL6,HMGA2,HSPA8,ICAM1,IFITM3,IL8,ITGA2,ITGA5,ITGB3,LDLR,NLRP6,PLSCR1,PTX3,TREM1,ZDHHC9
GO:BP	signal transduction by p53 class mediator	GO:0072331	FALSE	0.0136686	1.86428	175	340	13	21128	BCL3,CDKN1A,CHEK2,DDIT4,HIPK2,MUC1,MYC,NDRG1,RFFL,RPF2,RRS1,SNAI2,SOX4
GO:BP	detoxification of inorganic compound	GO:0061687	FALSE	0.0138282	1.85923	17	340	5	21128	MT1E,MT1G,MT1M,MT1X,MT2A
GO:BP	aromatic compound biosynthetic process	GO:0019438	FALSE	0.0140806	1.85138	4161	340	101	21128	ACVR1B,ADAM8,ADK,ADORA3,AKR1C3,APLN,ARNTL,ARNTL2,BAZ1A,BCL3,BCL6,BEND3,BHLHE40,BMP2,C5AR1,CDK18,CDK2,CDKN1A,CEBPB,CEBPD,CHEK2,CKS2,E2F3,ELL2,ETS2,FOSL1,FOSL2,GCH1,GLIS3,HGF,HIF1A,HIPK2,HMGA2,HMOX1,HSPA5,HSPA8,IKZF4,IL1RAP,IL33,IL6,IL8,IRAK2,KDM6B,KLF17,LIF,LRP8,MAFB,MLLT11,MUC1,MYC,NAMPT,NANS,NFIL3,NFKBIA,NKX3-1,NME1,NNMT,NOD2,PHC2,PIM1,PKNOX2,PLSCR1,PNP,POLR2H,POLR2L,PRRX1,PTPN2,RELB,RFC2,RIPK4,…
GO:BP	response to toxic substance	GO:0009636	FALSE	0.0145057	1.83846	232	340	15	21128	ADH4,ALOX5AP,ASS1,GCH1,MT1E,MT1G,MT1M,MT1X,MT2A,PIM1,S100A9,SLC7A11,SOD2,TLR2,TXN
GO:BP	amino acid transmembrane transport	GO:0003333	FALSE	0.0146557	1.83399	102	340	10	21128	RGS2,SLC11A1,SLC16A10,SLC1A3,SLC38A5,SLC43A2,SLC6A6,SLC6A9,SLC7A11,SLC7A5
GO:BP	regulation of phagocytosis	GO:0050764	TRUE	0.0146557	1.83399	102	340	10	21128	CCL2,FGR,IL15RA,ITGA2,NOD2,PLSCR1,PTX3,SLC11A1,TGM2,TLR2
GO:BP	cellular response to decreased oxygen levels	GO:0036294	FALSE	0.0147081	1.83244	150	340	12	21128	ADAM8,HIF1A,HILPDA,HIPK2,HMOX1,KCNK3,MYC,NDRG1,NKX3-1,PGK1,SLC9A1,VEGFA
GO:BP	collagen metabolic process	GO:0032963	TRUE	0.0160029	1.7958	103	340	10	21128	ADAMTS3,CTSL,ERRFI1,HIF1A,IL6,ITGA2,MMP1,MMP14,MMP19,MMP3
GO:BP	regulation of vascular associated smooth muscle cell proliferation	GO:1904705	FALSE	0.0164344	1.78425	62	340	8	21128	APLN,CDKN1A,ERN1,GNAI2,HMOX1,IGFBP5,P2RY6,SOD2
GO:BP	regulation of cytokine-mediated signaling pathway	GO:0001959	FALSE	0.0168573	1.77321	152	340	12	21128	CASP4,HIF1A,IL1R1,IL1R2,IL6,IRAK2,LAPTM5,NLRP6,PTPN2,RFFL,TNFAIP3,TSLP
GO:BP	regulation of T-helper 1 type immune response	GO:0002825	FALSE	0.0178034	1.7495	30	340	6	21128	IL1R1,IL1RL1,IL33,IL4R,JAK3,SLC11A1
GO:BP	T cell differentiation	GO:0030217	FALSE	0.0178593	1.74814	297	340	17	21128	ADAM8,BCL3,BCL6,CTSL,IL1RL2,IL4R,IL6,JAK3,KLHL25,MAFB,PNP,PTPN2,RELB,SOX4,TNFRSF9,TNFSF8,TRAF3IP2
GO:BP	macromolecule modification	GO:0043412	TRUE	0.0197156	1.70519	3873	340	95	21128	ABCA1,ACVR1B,ADAM8,ALKBH2,ARNTL,ARRDC3,B4GALT1,BCL6,BEND3,BIRC3,BMP2,C1GALT1,C5AR1,CCL2,CDK18,CDK2,CDKN1A,CHEK2,CKS2,DDIT4,ERN1,ERRFI1,FAM20C,FGR,FKBP5,GADD45B,GLRX,GNAI2,HGF,HIF1A,HIPK2,HMGA2,HSPA5,IGFBP3,IL6,IRAK2,ITGA5,ITGB3,JAK3,KDM6B,KLHL25,LAPTM5,LIF,LNX1,LRP8,MAP4K4,MAPK13,MARCO,METTL1,MLKL,MUC1,MVP,MYC,NEK6,NKX3-1,NNMT,NOD2,PDGFA,PDGFRA,PGF,PIK3R5,PIM1,PLAUR,PLOD2,PTPN2,PUS7,RFFL,RGS2,RIP…
GO:BP	regulation of protein phosphorylation	GO:0001932	FALSE	0.0206684	1.68469	1101	340	38	21128	ADAM8,BMP2,C5AR1,CDKN1A,CHEK2,CKS2,DDIT4,ERN1,ERRFI1,FGR,GADD45B,HGF,HIPK2,HMGA2,IGFBP3,IL6,ITGA5,ITGB3,LIF,LRP8,MARCO,MVP,NKX3-1,NOD2,PDGFA,PGF,PIK3R5,PLAUR,PTPN2,RGS2,SHC1,SLC11A1,SPRY4,TNFAIP3,TSLP,TXN,UBASH3B,VEGFA
GO:BP	lipid localization	GO:0010876	FALSE	0.0208621	1.68064	469	340	22	21128	ABCA1,ABCC3,AKR1C1,APOBR,AQP9,C1QTNF1,HILPDA,IL6,ITGB3,LDLR,LPCAT3,MSR1,NFKBIA,NKX3-1,PLIN2,PLSCR1,PTPN2,SLC2A1,SLC43A3,SPP1,TNFAIP8L3,VMP1
GO:BP	heterocycle biosynthetic process	GO:0018130	FALSE	0.0221343	1.65494	4150	340	100	21128	ACVR1B,ADAM8,ADK,ADORA3,AKR1C3,APLN,ARNTL,ARNTL2,BAZ1A,BCL3,BCL6,BEND3,BHLHE40,BMP2,C5AR1,CDK18,CDK2,CDKN1A,CEBPB,CEBPD,CHEK2,CKS2,E2F3,ELL2,ETS2,FOSL1,FOSL2,GCH1,GLIS3,HGF,HIF1A,HIPK2,HMGA2,HMOX1,HSPA5,HSPA8,IKZF4,IL1RAP,IL33,IL6,IL8,IRAK2,KDM6B,KLF17,LIF,LRP8,MAFB,MLLT11,MUC1,MYC,NAMPT,NANS,NFIL3,NFKBIA,NKX3-1,NME1,NNMT,NOD2,PHC2,PIM1,PKNOX2,PLSCR1,PNP,POLR2H,POLR2L,PRRX1,PTPN2,RELB,RFC2,RIPK4,…
GO:BP	regulation of kinase activity	GO:0043549	FALSE	0.0230133	1.63802	775	340	30	21128	ADAM8,BMP2,C5AR1,CDKN1A,CKS2,ERN1,ERRFI1,FGR,GADD45B,HGF,HMGA2,ITGB3,LRP8,MIDN,MVP,NOD2,PDGFA,PDGFRA,PIK3R5,PTPN2,RGS2,SHC1,SLAMF8,SLC11A1,SPRY4,TNFAIP3,TNFAIP8L3,TXN,UBASH3B,VEGFA
GO:BP	response to extracellular stimulus	GO:0009991	FALSE	0.0230872	1.63663	508	340	23	21128	AKR1C3,ASS1,CD68,CDKN1A,CHSY1,FOSL1,GNAI2,HMOX1,HSPA5,HSPA8,ITGA2,LDLR,NOD2,NUDT15,PIM1,PLIN2,SLC2A1,SLC7A5,SNAI2,SOD2,SPP1,UPP1,VDR
GO:BP	vascular associated smooth muscle cell proliferation	GO:1990874	FALSE	0.0235277	1.62842	65	340	8	21128	APLN,CDKN1A,ERN1,GNAI2,HMOX1,IGFBP5,P2RY6,SOD2
GO:BP	leukocyte cell-cell adhesion	GO:0007159	FALSE	0.0238365	1.62276	403	340	20	21128	ADAM8,ASS1,BCL6,CCL2,CEBPB,ICAM1,IL1RL2,IL4R,IL6,ITGA5,JAK3,KLHL25,LAPTM5,NOD2,OLR1,PNP,PTPN2,S100A9,SLC39A8,SOX4
GO:BP	negative regulation of platelet activation	GO:0010544	TRUE	0.0253055	1.59679	19	340	5	21128	C1QTNF1,PDGFA,PDGFRA,THBD,UBASH3B
GO:BP	animal organ morphogenesis	GO:0009887	FALSE	0.0262855	1.58028	1070	340	37	21128	BMP2,CCL2,CEBPB,CHSY1,ERRFI1,FAM20C,FGR,HGF,HIF1A,HIPK2,IGFBP5,IL6,ITGA2,ITGAX,LAMB1,LAMC2,LIF,MAFB,MFAP2,MMP14,MYC,NKX3-1,NPY2R,PDGFA,PDGFRA,PIM1,PLEKHA4,PRRX1,SIX4,SLC7A5,SNAI2,SOX4,TGM2,TLE2,TNFAIP3,VDR,VEGFA
GO:BP	entry into host	GO:0044409	TRUE	0.0267065	1.57338	159	340	12	21128	ANPEP,CLEC5A,CTSL,ICAM1,IFITM3,IL8,ITGA2,ITGA5,ITGB3,LDLR,PLSCR1,PTX3
GO:BP	cellular response to oxidative stress	GO:0034599	FALSE	0.0270844	1.56728	275	340	16	21128	AKR1C3,ARNTL,ERN1,GCH1,HGF,HIF1A,HMOX1,IL6,KDM6B,MAPK13,MMP3,PDGFRA,SLC7A11,SOD2,TNFAIP3,TXN
GO:BP	secretion	GO:0046903	FALSE	0.0270847	1.56728	945	340	34	21128	ABCA1,ADAM8,ADORA3,APLN,AQP9,ARNTL,BMP2,C1QTNF1,CCR1,FCGR3A,FGR,GNAI2,HIF1A,HK2,HMOX1,HRH2,IL4R,IL6,LIF,MIDN,NKX3-1,NLRP6,NME1,P2RY2,SLC16A10,SLC4A8,SNCG,SOX4,SPP1,STX1A,TLR2,TRAF3IP2,VDR,VEGFA
GO:BP	macromolecule biosynthetic process	GO:0009059	FALSE	0.02745	1.56146	4822	340	112	21128	ABCA1,ACVR1B,ADAM8,ADORA3,APLN,ARNTL,ARNTL2,B4GALT1,BAZ1A,BCL3,BCL6,BEND3,BHLHE40,BMP2,C1GALT1,C5AR1,CCL2,CDK18,CDK2,CDKN1A,CEBPB,CEBPD,CHEK2,CHST1,CHSY1,CKS2,DIO2,E2F3,EIF4EBP1,ELL2,ETS2,FOSL1,FOSL2,GLIS3,HGF,HIF1A,HIPK2,HMGA2,HMOX1,HSPA5,HSPA8,IGFBP5,IKZF4,IL1RAP,IL33,IL6,IL8,IRAK2,ITGA2,JAK3,KDM6B,KLF17,KLHL25,LIF,LRP8,MAFB,MLLT11,MPV17L2,MUC1,MYC,NAMPT,NFIL3,NFKBIA,NKX3-1,NOD2,PHC2,PHLDA1,PIM…
GO:BP	response to growth factor	GO:0070848	FALSE	0.0289795	1.53791	705	340	28	21128	ACVR1B,ADAMTS3,APLN,BMP2,CCL2,DDIT4,ERN1,ERRFI1,FAM20C,HGF,HIF1A,HIPK2,HSPA5,IL8,ITGA5,ITGB3,LRP8,MT1G,MYC,PDGFA,PDGFRA,PGF,SHC1,SNAI2,SPRED3,SPRY4,VEGFA,ZNF703
GO:BP	regulation of transferase activity	GO:0051338	FALSE	0.0299326	1.52386	908	340	33	21128	ADAM8,ARRDC3,BMP2,C5AR1,CDKN1A,CKS2,ERN1,ERRFI1,FGR,GADD45B,HGF,HMGA2,ITGB3,LRP8,MIDN,MVP,MYC,NOD2,PDGFA,PDGFRA,PIK3R5,PTPN2,RFC2,RGS2,SHC1,SLAMF8,SLC11A1,SPRY4,TNFAIP3,TNFAIP8L3,TXN,UBASH3B,VEGFA
GO:BP	body fluid secretion	GO:0007589	FALSE	0.0304445	1.51649	88	340	9	21128	APLN,HIF1A,HK2,NLRP6,NME1,P2RY2,TRAF3IP2,VDR,VEGFA
GO:BP	positive regulation of transcription from RNA polymerase II promoter in response to stress	GO:0036003	FALSE	0.0332969	1.4776	20	340	5	21128	CEBPB,HIF1A,HSPA5,MUC1,VEGFA
GO:BP	myeloid leukocyte differentiation	GO:0002573	FALSE	0.0337173	1.47215	219	340	14	21128	BMP2,CCR1,CEBPB,FAM20C,LIF,MAFB,MT1G,MYC,PTPN2,RELB,SBNO2,TLR2,UBASH3B,VEGFA
GO:BP	cellular response to growth factor stimulus	GO:0071363	FALSE	0.0367682	1.43453	675	340	27	21128	ACVR1B,ADAMTS3,APLN,BMP2,CCL2,DDIT4,ERN1,ERRFI1,FAM20C,HGF,HIF1A,HIPK2,HSPA5,IL8,ITGA5,ITGB3,LRP8,MT1G,PDGFA,PDGFRA,PGF,SHC1,SNAI2,SPRED3,SPRY4,VEGFA,ZNF703
GO:BP	small molecule metabolic process	GO:0044281	FALSE	0.0368684	1.43335	1857	340	54	21128	ABCA1,ADH4,ADK,AKR1C1,AKR1C3,ALOX5AP,APOBR,ASS1,B4GALT1,BCAT1,BEND3,BMP2,C1QTNF1,CA12,CA13,CHST1,DDIT4,GCH1,GK,GLRX,HIF1A,HK2,HSPA8,IER3,IGFBP3,ITPKC,KLHL25,LDLR,LPCAT3,MID1IP1,MIDN,MTHFD2,NAMPT,NANS,NME1,NNMT,NSDHL,NUDT15,P2RY6,PGK1,PLOD2,PNP,PTPN2,SEC14L2,SHMT2,SLC1A3,SLC2A1,SLC39A8,SLC6A8,SLC7A11,SNAI2,ST3GAL1,TLR2,UPP1
GO:BP	regulation of lipid localization	GO:1905952	FALSE	0.0388359	1.41077	165	340	12	21128	ABCA1,C1QTNF1,HILPDA,IL6,ITGB3,LPCAT3,MSR1,NFKBIA,NKX3-1,PLIN2,PTPN2,SPP1
GO:BP	negative regulation of biosynthetic process	GO:0009890	FALSE	0.0392678	1.40596	1627	340	49	21128	AKR1C3,ARNTL,ATP1A1,BCL3,BCL6,BEND3,BHLHE40,BMP2,CDK2,CDKN1A,CEBPB,CEBPD,EIF4EBP1,ERRFI1,ETS2,GLIS3,HIPK2,HMGA2,HSPA8,IGFBP5,IKZF4,IL33,IL6,JAK3,KLHL25,MAFB,MUC1,MYC,NFIL3,NKX3-1,PDGFA,PHC2,PLEKHN1,PRRX1,PTPN2,PUS7,RELB,RGS2,SBNO2,SHC1,SHMT2,SIX4,SNAI2,TLE2,TXN,VDR,VEGFA,YBX3,ZNF703
GO:BP	positive regulation of protein modification process	GO:0031401	FALSE	0.0398398	1.39968	1005	340	35	21128	ADAM8,ARNTL,ARRDC3,BCL6,BIRC3,BMP2,CDKN1A,CHEK2,CKS2,ERN1,HGF,HIPK2,HMGA2,HSPA5,IL6,ITGA5,ITGB3,LAPTM5,LIF,LRP8,MARCO,MUC1,NKX3-1,NNMT,NOD2,PDGFA,PGF,PIK3R5,PLAUR,SLC11A1,SNAI2,SOX4,TSLP,TXN,VEGFA
GO:BP	B-1 B cell homeostasis	GO:0001922	TRUE	0.0408182	1.38915	4	340	3	21128	HIF1A,SH2B2,TNFAIP3
GO:BP	negative regulation of lipid storage	GO:0010888	FALSE	0.0431276	1.36524	21	340	5	21128	ABCA1,IL6,ITGB3,NFKBIA,PTPN2
GO:BP	cellular response to oxygen levels	GO:0071453	FALSE	0.0438301	1.35823	167	340	12	21128	ADAM8,HIF1A,HILPDA,HIPK2,HMOX1,KCNK3,MYC,NDRG1,NKX3-1,PGK1,SLC9A1,VEGFA
GO:BP	regulation of lymphocyte activation	GO:0051249	FALSE	0.0447862	1.34886	567	340	24	21128	ADAM8,BCL6,CCL2,CDKN1A,CEBPB,FCGR3A,FGR,IL15RA,IL1RL2,IL4R,IL6,JAK3,KLHL25,LAPTM5,MMP14,NOD2,PNP,PTPN2,SLAMF8,SOX4,TNFAIP3,TNFRSF9,TNFSF8,TNIP2
GO:BP	I-kappaB kinase/NF-kappaB signaling	GO:0007249	FALSE	0.0459519	1.3377	287	340	16	21128	BCL3,BIRC3,HMOX1,IRAK2,NEK6,NFKBIA,NLRP6,NOD2,RELB,SLC20A1,TIFA,TLR2,TNFAIP3,TNIP2,TRAF1,TRAF3IP2
GO:BP	alpha-beta T cell differentiation	GO:0046632	FALSE	0.0460198	1.33706	116	340	10	21128	BCL3,BCL6,CTSL,IL4R,IL6,JAK3,KLHL25,PNP,RELB,TNFSF8
GO:BP	immune effector process	GO:0002252	FALSE	0.0464358	1.33315	684	340	27	21128	BCL3,BCL6,C1RL,CFB,CXCL6,DNAJB9,FCGR3A,FGR,HMOX1,ICAM1,IL1R1,IL33,IL4R,IL6,JAK3,LAPTM5,NLRP6,NOD2,PTX3,RELB,SBNO2,SLAMF8,SLC11A1,SLC7A5,ST3GAL1,TRAF3IP2,TREM1
GO:BP	tissue remodeling	GO:0048771	FALSE	0.0465309	1.33226	168	340	12	21128	ADAM8,HIF1A,IGFBP5,IL6,ITGB3,LIF,MMP14,SPP1,TIMP1,TNFAIP3,UBASH3B,VDR
GO:BP	cellular response to reactive oxygen species	GO:0034614	FALSE	0.0487138	1.31235	142	340	11	21128	AKR1C3,ERN1,GCH1,HGF,IL6,KDM6B,MAPK13,PDGFRA,SOD2,TNFAIP3,TXN
GO:CC	extracellular region	GO:0005576	TRUE	2.48e-13	12.606	4234	340	128	22112	ADAMTS3,AKR1C1,AKR1C3,ANGPTL2,ANPEP,APLN,APOBR,ARMC9,ARPC5L,ASS1,ATP1A1,B4GALT1,BMP2,C1QTNF1,C1RL,CAPG,CASP4,CCL2,CCL20,CCL7,CD163,CD82,CDC37L1,CDCP1,CFB,CHSY1,CTSL,CXCL1,CXCL3,CXCL5,CXCL6,DNAJB9,ERMN,ESM1,FAM20C,FCGR3A,FGR,FKBP5,FTH1,GGCT,GK,GLRX,GNAI2,HGF,HILPDA,HMOX1,HSPA5,HSPA8,ICAM1,IFI30,IGFBP3,IGFBP5,IL15RA,IL1R1,IL1R2,IL1RAP,IL1RL1,IL33,IL4R,IL6,IL8,ITGB3,LAMB1,LAMC2,LDLR,LIF,LRP8,LRRC4C,…
GO:CC	extracellular space	GO:0005615	FALSE	3.65e-12	11.4381	3379	340	108	22112	ADAMTS3,AKR1C1,AKR1C3,ANGPTL2,ANPEP,APLN,APOBR,ARMC9,ARPC5L,ASS1,ATP1A1,B4GALT1,BMP2,C1QTNF1,C1RL,CAPG,CCL2,CCL20,CCL7,CD82,CFB,CTSL,CXCL1,CXCL3,CXCL5,CXCL6,DNAJB9,ERMN,FAM20C,FCGR3A,FGR,FKBP5,FTH1,GGCT,GK,GLRX,GNAI2,HGF,HILPDA,HMOX1,HSPA5,HSPA8,ICAM1,IGFBP3,IGFBP5,IL15RA,IL33,IL4R,IL6,IL8,ITGB3,LAMB1,LAMC2,LDLR,LIF,LRP8,LRRC4C,MMP14,MMP19,MMP3,MSMP,MSR1,MTHFD2,MUC1,MVP,NAMPT,NANS,NDRG1,NME1,ORM2…
GO:CC	cell periphery	GO:0071944	TRUE	1.99e-11	10.7018	6168	340	159	22112	ABCA1,ABCC3,ACVR1B,ADAM8,ADAMTS3,ADK,ADORA3,ANGPTL2,ANPEP,APCDD1L,APOBR,AQP9,ARRDC3,ATP1A1,B4GALT1,BCL3,BEST1,BMP2,C5AR1,CA12,CASP4,CCR1,CD163,CD68,CD82,CDC42EP4,CDCP1,CFB,CLEC5A,CLMP,CNTNAP1,CTSL,DIO2,ERMN,ERRFI1,ETS2,FCGR3A,FGR,FLVCR2,FOSL1,FPR1,GNAI2,HK2,HMOX1,HRH2,HSPA5,HSPA8,ICAM1,IFITM3,IL15RA,IL1R1,IL1R2,IL1RAP,IL1RL1,IL1RL2,IL4R,IL6,IRAK2,ITGA2,ITGA5,ITGAX,ITGB3,JAK3,KCNK15,KCNK3,LAIR1,LA…
GO:CC	vesicle	GO:0031982	FALSE	2.38e-11	10.623	3973	340	118	22112	ABCA1,ADAM8,ADAMTS3,AKR1C1,AKR1C3,ANGPTL2,ANPEP,ARMC9,ARPC5L,ARRDC3,ASS1,ATP1A1,B4GALT1,C1RL,C5AR1,CAPG,CD163,CD68,CD82,CDC37L1,CDC42EP4,CDK2,CFB,CLEC5A,CTSL,CXCL1,DNAJB9,ERMN,FAM20C,FCGR3A,FGR,FKBP5,FPR1,FTH1,GCH1,GGCT,GK,GLRX,GNAI2,HGF,HILPDA,HSPA5,HSPA8,ICAM1,IFITM3,IL15RA,IL33,IRAK2,ITGA5,ITGAX,ITGB3,JAK3,LAIR1,LAMB1,LAPTM5,LDLR,LHFPL2,MARCO,MMP14,MSR1,MUC1,MVP,NAMPT,NANS,NDRG1,NME1,NOD2,OLR1…
GO:CC	plasma membrane	GO:0005886	FALSE	1.48e-07	6.82836	5682	340	139	22112	ABCA1,ABCC3,ACVR1B,ADAM8,ADK,ADORA3,ANPEP,APCDD1L,APOBR,AQP9,ARRDC3,ATP1A1,B4GALT1,BCL3,BEST1,BMP2,C5AR1,CA12,CASP4,CCR1,CD163,CD68,CD82,CDC42EP4,CDCP1,CFB,CLEC5A,CLMP,CNTNAP1,CTSL,DIO2,ERRFI1,ETS2,FCGR3A,FGR,FLVCR2,FOSL1,FPR1,GNAI2,HK2,HMOX1,HRH2,HSPA5,HSPA8,ICAM1,IFITM3,IL15RA,IL1R1,IL1R2,IL1RAP,IL1RL1,IL1RL2,IL4R,IL6,IRAK2,ITGA2,ITGA5,ITGAX,ITGB3,JAK3,KCNK15,KCNK3,LAIR1,LDLR,LHFPL2,LILRA6,LRP8…
GO:CC	secretory granule	GO:0030141	FALSE	2.4728e-06	5.60681	874	340	38	22112	ADAM8,ANPEP,B4GALT1,C5AR1,CD68,CDC37L1,CLEC5A,CTSL,CXCL1,FGR,FPR1,FTH1,HGF,HILPDA,HSPA8,ITGAX,ITGB3,LAIR1,LHFPL2,MVP,OLR1,ORM2,PDGFA,PLAUR,PNP,PTX3,PYGL,S100A9,SERPINA1,SERPINA3,SERPINB1,SLC11A1,SLC6A9,STX1A,THBS2,TIMP1,TLR2,VEGFA
GO:CC	cell surface	GO:0009986	FALSE	2.75502e-06	5.55988	955	340	40	22112	ABCA1,ACVR1B,ADAM8,ANPEP,B4GALT1,BMP2,CCR1,CD163,CLEC5A,CLMP,FCGR3A,HILPDA,HSPA5,ICAM1,IL15RA,IL1R1,IL1RL1,IL4R,ITGA2,ITGA5,ITGAX,ITGB3,LDLR,LRP8,MSR1,NOD2,OSMR,PDGFA,PDGFRA,PLAUR,SLAMF8,SLC1A3,SLC7A11,SLC7A5,SLC9A1,THBD,TLR2,TNFRSF10D,TNFRSF9,VEGFA
GO:CC	basal part of cell	GO:0045178	FALSE	3.12676e-06	5.5049	275	340	20	22112	ABCC3,AQP9,ATP1A1,B4GALT1,BEST1,C5AR1,ITGA2,LDLR,NOD2,P2RY6,SLC16A10,SLC1A3,SLC2A1,SLC39A8,SLC43A3,SLC6A6,SLC6A9,SLC7A5,SLC9A1,ST14
GO:CC	extracellular exosome	GO:0070062	FALSE	4.80307e-06	5.31848	2109	340	66	22112	ADAMTS3,AKR1C1,AKR1C3,ANGPTL2,ANPEP,ARMC9,ARPC5L,ASS1,ATP1A1,B4GALT1,C1RL,CAPG,CD82,CFB,CTSL,DNAJB9,ERMN,FAM20C,FCGR3A,FGR,FKBP5,FTH1,GGCT,GK,GLRX,GNAI2,HSPA5,HSPA8,ICAM1,ITGB3,LAMB1,MUC1,MVP,NAMPT,NANS,NDRG1,NME1,ORM2,PGK1,PI15,PLOD2,PLSCR1,PNP,PYGL,S100A9,SEC14L2,SERPINA1,SERPINA3,SERPINB1,SERPINB8,SHMT2,SIAE,SLC2A1,SLC7A5,SLC9A1,SNCG,SOD2,SPP1,ST3GAL1,TGM2,TIMP1,TMEM2,TMEM52B,TNFAIP3,TUBB3,TXN
GO:CC	basolateral plasma membrane	GO:0016323	FALSE	5.18597e-06	5.28517	229	340	18	22112	ABCC3,AQP9,ATP1A1,B4GALT1,BEST1,C5AR1,LDLR,NOD2,P2RY6,SLC16A10,SLC2A1,SLC39A8,SLC43A3,SLC6A6,SLC6A9,SLC7A5,SLC9A1,ST14
GO:CC	basal plasma membrane	GO:0009925	FALSE	5.27757e-06	5.27757	256	340	19	22112	ABCC3,AQP9,ATP1A1,B4GALT1,BEST1,C5AR1,LDLR,NOD2,P2RY6,SLC16A10,SLC1A3,SLC2A1,SLC39A8,SLC43A3,SLC6A6,SLC6A9,SLC7A5,SLC9A1,ST14
GO:CC	extracellular vesicle	GO:1903561	FALSE	7.43142e-06	5.12893	2133	340	66	22112	ADAMTS3,AKR1C1,AKR1C3,ANGPTL2,ANPEP,ARMC9,ARPC5L,ASS1,ATP1A1,B4GALT1,C1RL,CAPG,CD82,CFB,CTSL,DNAJB9,ERMN,FAM20C,FCGR3A,FGR,FKBP5,FTH1,GGCT,GK,GLRX,GNAI2,HSPA5,HSPA8,ICAM1,ITGB3,LAMB1,MUC1,MVP,NAMPT,NANS,NDRG1,NME1,ORM2,PGK1,PI15,PLOD2,PLSCR1,PNP,PYGL,S100A9,SEC14L2,SERPINA1,SERPINA3,SERPINB1,SERPINB8,SHMT2,SIAE,SLC2A1,SLC7A5,SLC9A1,SNCG,SOD2,SPP1,ST3GAL1,TGM2,TIMP1,TMEM2,TMEM52B,TNFAIP3,TUBB3,TXN
GO:CC	extracellular organelle	GO:0043230	FALSE	7.56632e-06	5.12112	2134	340	66	22112	ADAMTS3,AKR1C1,AKR1C3,ANGPTL2,ANPEP,ARMC9,ARPC5L,ASS1,ATP1A1,B4GALT1,C1RL,CAPG,CD82,CFB,CTSL,DNAJB9,ERMN,FAM20C,FCGR3A,FGR,FKBP5,FTH1,GGCT,GK,GLRX,GNAI2,HSPA5,HSPA8,ICAM1,ITGB3,LAMB1,MUC1,MVP,NAMPT,NANS,NDRG1,NME1,ORM2,PGK1,PI15,PLOD2,PLSCR1,PNP,PYGL,S100A9,SEC14L2,SERPINA1,SERPINA3,SERPINB1,SERPINB8,SHMT2,SIAE,SLC2A1,SLC7A5,SLC9A1,SNCG,SOD2,SPP1,ST3GAL1,TGM2,TIMP1,TMEM2,TMEM52B,TNFAIP3,TUBB3,TXN
GO:CC	extracellular membrane-bounded organelle	GO:0065010	FALSE	7.56632e-06	5.12112	2134	340	66	22112	ADAMTS3,AKR1C1,AKR1C3,ANGPTL2,ANPEP,ARMC9,ARPC5L,ASS1,ATP1A1,B4GALT1,C1RL,CAPG,CD82,CFB,CTSL,DNAJB9,ERMN,FAM20C,FCGR3A,FGR,FKBP5,FTH1,GGCT,GK,GLRX,GNAI2,HSPA5,HSPA8,ICAM1,ITGB3,LAMB1,MUC1,MVP,NAMPT,NANS,NDRG1,NME1,ORM2,PGK1,PI15,PLOD2,PLSCR1,PNP,PYGL,S100A9,SEC14L2,SERPINA1,SERPINA3,SERPINB1,SERPINB8,SHMT2,SIAE,SLC2A1,SLC7A5,SLC9A1,SNCG,SOD2,SPP1,ST3GAL1,TGM2,TIMP1,TMEM2,TMEM52B,TNFAIP3,TUBB3,TXN
GO:CC	secretory vesicle	GO:0099503	FALSE	9.61869e-06	5.01688	1040	340	41	22112	ADAM8,ANPEP,B4GALT1,C5AR1,CD68,CDC37L1,CLEC5A,CTSL,CXCL1,FGR,FPR1,FTH1,HGF,HILPDA,HSPA8,ITGAX,ITGB3,LAIR1,LHFPL2,MVP,OLR1,ORM2,PDGFA,PLAUR,PNP,PTX3,PYGL,S100A9,SERPINA1,SERPINA3,SERPINB1,SLC11A1,SLC4A8,SLC6A9,STX1A,STX6,THBS2,TIMP1,TLR2,TRIM9,VEGFA
GO:CC	cytoplasmic vesicle	GO:0031410	FALSE	9.7253e-06	5.0121	2485	340	73	22112	ABCA1,ADAM8,ANPEP,ARRDC3,ATP1A1,B4GALT1,C5AR1,CAPG,CD163,CD68,CDC37L1,CDC42EP4,CDK2,CLEC5A,CTSL,CXCL1,FGR,FPR1,FTH1,GCH1,HGF,HILPDA,HSPA5,HSPA8,IFITM3,IL15RA,IL33,IRAK2,ITGA5,ITGAX,ITGB3,JAK3,LAIR1,LAPTM5,LDLR,LHFPL2,MARCO,MMP14,MSR1,MVP,NDRG1,NOD2,OLR1,ORM2,PDGFA,PHLDA1,PLAUR,PNP,PTX3,PYGL,RASGEF1B,RFFL,RND1,RND3,S100A9,SERPINA1,SERPINA3,SERPINB1,SLA,SLC11A1,SLC1A3,SLC2A1,SLC4A8,SLC6A9,STEAP1,ST…
GO:CC	intracellular vesicle	GO:0097708	FALSE	1.00509e-05	4.9978	2487	340	73	22112	ABCA1,ADAM8,ANPEP,ARRDC3,ATP1A1,B4GALT1,C5AR1,CAPG,CD163,CD68,CDC37L1,CDC42EP4,CDK2,CLEC5A,CTSL,CXCL1,FGR,FPR1,FTH1,GCH1,HGF,HILPDA,HSPA5,HSPA8,IFITM3,IL15RA,IL33,IRAK2,ITGA5,ITGAX,ITGB3,JAK3,LAIR1,LAPTM5,LDLR,LHFPL2,MARCO,MMP14,MSR1,MVP,NDRG1,NOD2,OLR1,ORM2,PDGFA,PHLDA1,PLAUR,PNP,PTX3,PYGL,RASGEF1B,RFFL,RND1,RND3,S100A9,SERPINA1,SERPINA3,SERPINB1,SLA,SLC11A1,SLC1A3,SLC2A1,SLC4A8,SLC6A9,STEAP1,ST…
GO:CC	cytoplasm	GO:0005737	FALSE	1.04126e-05	4.98244	12321	340	238	22112	A4GALT,ABCA1,ACVR1B,ADAM8,ADH4,ADK,AKR1C1,AKR1C3,ALOX5AP,ANPEP,ARMC9,ARNTL,ARNTL2,ARPC5L,ARRDC3,ASS1,ATP1A1,B4GALT1,BCAT1,BCL2A1,BCL3,BCL6,BEST1,BHLHE40,BIRC3,C15ORF48,C1GALT1,C5AR1,CA13,CAPG,CASP4,CCR1,CD163,CD68,CDC37L1,CDC42EP4,CDK18,CDK2,CDKN1A,CEBPB,CHEK2,CHST1,CHSY1,CLEC5A,CLMP,CTSL,CXCL1,DDIT4,DNAJB9,EIF4EBP1,ERMN,ERN1,ERRFI1,ETS2,FAM20C,FGR,FKBP5,FOSL1,FPR1,FTH1,GADD45B,GCH1,GGCT,GK,GLRX,…
GO:CC	side of membrane	GO:0098552	FALSE	5.02525e-05	4.29884	631	340	29	22112	ABCA1,ANPEP,B4GALT1,CCR1,CD163,ERRFI1,FCGR3A,FGR,GNAI2,HSPA8,ICAM1,IL1R1,IL1RL1,IL4R,ITGA2,ITGA5,ITGAX,ITGB3,LDLR,MSR1,OSMR,PDGFRA,PLEKHA4,RGS2,SLA,SLC7A5,THBD,TNFRSF9,TRAF1
GO:CC	platelet alpha granule	GO:0031091	FALSE	0.000349988	3.45595	90	340	10	22112	HGF,ITGB3,LHFPL2,ORM2,PDGFA,SERPINA1,SERPINA3,THBS2,TIMP1,VEGFA
GO:CC	growth factor complex	GO:0036454	TRUE	0.00102859	2.98776	8	340	4	22112	IGFBP3,IGFBP5,PDGFA,VEGFA
GO:CC	external side of plasma membrane	GO:0009897	FALSE	0.00127395	2.89485	436	340	21	22112	ABCA1,ANPEP,B4GALT1,CCR1,CD163,FCGR3A,ICAM1,IL1R1,IL1RL1,IL4R,ITGA2,ITGA5,ITGAX,ITGB3,LDLR,MSR1,OSMR,PDGFRA,SLC7A5,THBD,TNFRSF9
GO:CC	extracellular matrix	GO:0031012	FALSE	0.00226814	2.64433	565	340	24	22112	ADAMTS3,ANGPTL2,CTSL,ICAM1,LAMB1,LAMC2,MFAP2,MMP1,MMP14,MMP19,MMP3,ORM2,PLSCR1,PTX3,S100A9,SERPINA1,SERPINA3,SERPINB1,SERPINB8,TFPI2,TGM2,THBS2,TIMP1,VEGFA
GO:CC	endomembrane system	GO:0012505	FALSE	0.00231192	2.63603	4730	340	107	22112	A4GALT,ABCA1,ADAM8,ALOX5AP,ANPEP,ARRDC3,ASS1,ATP1A1,B4GALT1,BCL6,C1GALT1,C5AR1,CASP4,CD68,CDC37L1,CDC42EP4,CDK2,CHEK2,CHST1,CHSY1,CLEC5A,CTSL,CXCL1,DNAJB9,ERN1,FAM20C,FGR,FPR1,FTH1,GCH1,HGF,HILPDA,HK2,HMOX1,HSPA5,HSPA8,IFITM3,IGFBP3,IGFBP5,IL15RA,IL33,IL6,IRAK2,ITGA5,ITGAX,ITGB3,JAK3,LAIR1,LAMB1,LAPTM5,LDLR,LHFPL2,LMNB1,LPCAT3,MMP14,MUC1,MVP,MYC,NDRG1,NLRP6,NOD2,NSDHL,OLR1,ORM2,PDGFA,PDGFRA,PLAUR…
GO:CC	external encapsulating structure	GO:0030312	FALSE	0.00233583	2.63156	566	340	24	22112	ADAMTS3,ANGPTL2,CTSL,ICAM1,LAMB1,LAMC2,MFAP2,MMP1,MMP14,MMP19,MMP3,ORM2,PLSCR1,PTX3,S100A9,SERPINA1,SERPINA3,SERPINB1,SERPINB8,TFPI2,TGM2,THBS2,TIMP1,VEGFA
GO:CC	plasma membrane region	GO:0098590	FALSE	0.00282907	2.54836	1207	340	39	22112	ABCC3,ADORA3,AQP9,ATP1A1,B4GALT1,BEST1,C5AR1,CNTNAP1,CTSL,FGR,FOSL1,HMOX1,HSPA8,ITGA5,ITGB3,LDLR,LRP8,LRRC4C,MUC1,NME1,NOD2,OSMR,P2RY6,SLC16A10,SLC1A3,SLC2A1,SLC39A8,SLC43A3,SLC4A8,SLC6A6,SLC6A8,SLC6A9,SLC7A11,SLC7A5,SLC9A1,SPRY4,ST14,STX1A,THBD
GO:CC	secretory granule lumen	GO:0034774	FALSE	0.00296822	2.5275	320	340	17	22112	CDC37L1,CXCL1,FGR,HGF,HSPA8,MVP,ORM2,PDGFA,PNP,PTX3,PYGL,S100A9,SERPINA1,SERPINA3,SERPINB1,TIMP1,VEGFA
GO:CC	cytoplasmic vesicle lumen	GO:0060205	FALSE	0.00335058	2.47488	323	340	17	22112	CDC37L1,CXCL1,FGR,HGF,HSPA8,MVP,ORM2,PDGFA,PNP,PTX3,PYGL,S100A9,SERPINA1,SERPINA3,SERPINB1,TIMP1,VEGFA
GO:CC	vesicle lumen	GO:0031983	FALSE	0.00362937	2.44017	325	340	17	22112	CDC37L1,CXCL1,FGR,HGF,HSPA8,MVP,ORM2,PDGFA,PNP,PTX3,PYGL,S100A9,SERPINA1,SERPINA3,SERPINB1,TIMP1,VEGFA
GO:CC	membrane	GO:0016020	FALSE	0.016152	1.79177	9840	340	187	22112	A4GALT,ABCA1,ABCC3,ACVR1B,ADAM8,ADK,ADORA3,ALOX5AP,ANPEP,APCDD1L,APOBR,AQP9,ARRDC3,ASS1,ATP1A1,B4GALT1,BCL2A1,BCL3,BEST1,BIRC3,BMP2,C15ORF48,C1GALT1,C1ORF162,C5AR1,CA12,CASP4,CCR1,CD163,CD68,CD82,CDC42EP4,CDCP1,CFB,CHST1,CHSY1,CLEC5A,CLMP,CNTNAP1,CTSL,DIO2,DNAJB9,ERN1,ERRFI1,ETS2,FAM20C,FCGR3A,FGR,FKBP5,FLVCR2,FOSL1,FPR1,FTH1,GCH1,GK,GNAI2,HGF,HILPDA,HK2,HMOX1,HRH2,HSPA5,HSPA8,ICAM1,IER3,IFITM3,I…
GO:CC	platelet alpha granule lumen	GO:0031093	FALSE	0.0191935	1.71685	66	340	7	22112	HGF,ORM2,PDGFA,SERPINA1,SERPINA3,TIMP1,VEGFA
GO:CC	secretory granule membrane	GO:0030667	TRUE	0.0271211	1.56669	309	340	15	22112	ADAM8,ANPEP,B4GALT1,C5AR1,CD68,CLEC5A,FPR1,ITGAX,ITGB3,LAIR1,LHFPL2,OLR1,PLAUR,SLC11A1,TLR2
GO:CC	protein complex involved in cell adhesion	GO:0098636	TRUE	0.0443656	1.35295	53	340	6	22112	ITGA2,ITGA5,ITGAX,ITGB3,LAMB1,PLAUR
GO:CC	RNA polymerase II transcription regulator complex	GO:0090575	TRUE	0.0486517	1.3129	255	340	13	22112	ARNTL,ARNTL2,CEBPB,CEBPD,E2F3,FOSL1,FOSL2,HIF1A,HIPK2,MAFB,MYC,NFIL3,VDR
KEGG	TNF signaling pathway	KEGG:04668	FALSE	8.92e-10	9.04959	113	212	20	8091	BCL3,BIRC3,CCL2,CCL20,CEBPB,CXCL1,CXCL3,CXCL5,CXCL6,ICAM1,IL6,LIF,MAPK13,MLKL,MMP14,MMP3,NFKBIA,NOD2,TNFAIP3,TRAF1
KEGG	IL-17 signaling pathway	KEGG:04657	FALSE	1.46e-09	8.83693	91	212	18	8091	CCL2,CCL20,CCL7,CEBPB,CXCL1,CXCL3,CXCL5,CXCL6,FOSL1,IL6,IL8,MAPK13,MMP1,MMP3,NFKBIA,S100A9,TNFAIP3,TRAF3IP2
KEGG	Cytokine-cytokine receptor interaction	KEGG:04060	FALSE	4.04931e-06	5.39262	293	212	26	8091	ACVR1B,BMP2,CCL2,CCL20,CCL7,CCR1,CXCL1,CXCL3,CXCL5,CXCL6,IL15RA,IL1R1,IL1R2,IL1RAP,IL1RL1,IL1RL2,IL33,IL4R,IL6,IL8,LIF,OSMR,TNFRSF10D,TNFRSF9,TNFSF8,TSLP
KEGG	Rheumatoid arthritis	KEGG:05323	FALSE	5.49314e-06	5.26018	88	212	14	8091	CCL2,CCL20,CTSL,CXCL1,CXCL3,CXCL5,CXCL6,ICAM1,IL6,IL8,MMP1,MMP3,TLR2,VEGFA
KEGG	Mineral absorption	KEGG:04978	FALSE	0.00029913	3.52414	60	212	10	8091	ATP1A1,FTH1,HMOX1,MT1E,MT1G,MT1M,MT1X,MT2A,STEAP1,VDR
KEGG	Small cell lung cancer	KEGG:05222	FALSE	0.000444583	3.35205	92	212	12	8091	BIRC3,CDK2,CDKN1A,CKS2,E2F3,GADD45B,ITGA2,LAMB1,LAMC2,MYC,NFKBIA,TRAF1
KEGG	Lipid and atherosclerosis	KEGG:05417	FALSE	0.0011851	2.92624	214	212	18	8091	ABCA1,CCL2,CXCL1,CXCL3,ERN1,HSPA5,HSPA8,ICAM1,IL6,IL8,LDLR,MAPK13,MMP1,MMP3,NFKBIA,OLR1,SOD2,TLR2
KEGG	NF-kappa B signaling pathway	KEGG:04064	FALSE	0.00131495	2.88109	102	212	12	8091	BCL2A1,BIRC3,CXCL1,CXCL3,GADD45B,ICAM1,IL1R1,IL8,NFKBIA,RELB,TNFAIP3,TRAF1
KEGG	Transcriptional misregulation in cancer	KEGG:05202	FALSE	0.00412668	2.3844	192	212	16	8091	BCL2A1,BCL6,BIRC3,CDKN1A,CEBPB,GADD45B,HMGA2,IGFBP3,IL1R2,IL6,IL8,MMP3,MYC,PDGFA,SIX4,TRAF1
KEGG	Pathways in cancer	KEGG:05200	FALSE	0.00458096	2.33904	529	212	30	8091	BIRC3,BMP2,CDK2,CDKN1A,CKS2,E2F3,GADD45B,GNAI2,HGF,HIF1A,HMOX1,IL15RA,IL4R,IL6,IL8,ITGA2,JAK3,LAMB1,LAMC2,MMP1,MYC,NFKBIA,NKX3-1,PDGFA,PDGFRA,PGF,PIM1,SLC2A1,TRAF1,VEGFA
KEGG	Viral protein interaction with cytokine and cytokine receptor	KEGG:04061	FALSE	0.0047291	2.32522	98	212	11	8091	CCL2,CCL20,CCL7,CCR1,CXCL1,CXCL3,CXCL5,CXCL6,IL6,IL8,TNFRSF10D
KEGG	PI3K-Akt signaling pathway	KEGG:04151	FALSE	0.00477408	2.32111	353	212	23	8091	CDK2,CDKN1A,DDIT4,EIF4EBP1,HGF,IL4R,IL6,ITGA2,ITGA5,ITGB3,JAK3,LAMB1,LAMC2,MYC,OSMR,PDGFA,PDGFRA,PGF,PIK3R5,SPP1,THBS2,TLR2,VEGFA
KEGG	Fluid shear stress and atherosclerosis	KEGG:05418	FALSE	0.00631379	2.19971	138	212	13	8091	ASS1,CCL2,CTSL,HMOX1,ICAM1,IL1R1,IL1R2,ITGB3,MAPK13,PDGFA,THBD,TXN,VEGFA
KEGG	NOD-like receptor signaling pathway	KEGG:04621	FALSE	0.00818374	2.08705	182	212	15	8091	BIRC3,CARD6,CASP4,CCL2,CXCL1,CXCL3,IL6,IL8,MAPK13,NAMPT,NFKBIA,NLRP6,NOD2,TNFAIP3,TXN
KEGG	Chemokine signaling pathway	KEGG:04062	FALSE	0.013304	1.87602	190	212	15	8091	CCL2,CCL20,CCL7,CCR1,CXCL1,CXCL3,CXCL5,CXCL6,FGR,GNAI2,IL8,JAK3,NFKBIA,PIK3R5,SHC1
KEGG	Human T-cell leukemia virus 1 infection	KEGG:05166	FALSE	0.019664	1.70633	219	212	16	8091	CDK2,CDKN1A,CHEK2,E2F3,ETS2,FOSL1,ICAM1,IL15RA,IL1R1,IL1R2,IL6,JAK3,MYC,NFKBIA,RELB,SLC2A1
KEGG	Cellular senescence	KEGG:04218	FALSE	0.022003	1.65752	156	212	13	8091	CDK2,CDKN1A,CHEK2,E2F3,EIF4EBP1,GADD45B,HIPK2,IGFBP3,IL6,IL8,MAPK13,MYC,TRAF3IP2
KEGG	Malaria	KEGG:05144	FALSE	0.0261445	1.58262	49	212	7	8091	CCL2,HGF,ICAM1,IL6,IL8,THBS2,TLR2
KEGG	JAK-STAT signaling pathway	KEGG:04630	FALSE	0.0404714	1.39285	166	212	13	8091	CDKN1A,IL15RA,IL4R,IL6,JAK3,LIF,MYC,OSMR,PDGFA,PDGFRA,PIM1,PTPN2,TSLP
