# Supplementary material for: Integrated bulk and scRNA sequence identified anoikis-related diagnostic biomarkers and potential association with immune infiltration in type A aortic dissection
Source: Aging (Albany NY). 2023 Oct 24;15(20):11268–85. doi: 10.18632/aging.205126 (PMC10637813; doi:10.18632/aging.205126)
Supplement: Supplementary Table 5 [file aging-15-205126-s005.xlsx]

## Sheet: TableS5
Supplementay Table 5. Results of GO and KEGG enrichment analysis of up-regulated DEGs.
source	term_name	term_id	highlighted	adjusted_p_value	negative_log10_of_adjusted_p_value	term_size	query_size	intersection_size	effective_domain_size	intersections
GO:MF	extracellular matrix structural constituent	GO:0005201	TRUE	1.6e-11	10.7946	174	774	33	20171	ABI3BP,ADIPOQ,ASPN,COL12A1,COL15A1,COL21A1,COL28A1,COL6A6,COLQ,CTHRC1,DCN,DPT,EMILIN3,FBLN1,FBLN2,FRAS1,HMCN1,HMCN2,IMPG2,LTBP1,MATN2,MFAP5,MMRN1,MMRN2,MXRA5,OGN,PODN,SBSPON,SPON1,TINAGL1,TNXB,VWA1,VWF
GO:MF	calcium ion binding	GO:0005509	TRUE	7.7e-10	9.11324	724	774	70	20171	ACTN2,ACTN4,ALPL,ANXA3,ASPN,CASQ2,CD248,CDH2,CDH23,CDH5,CDH8,CLEC3B,CLSTN2,DGKG,DLL4,DNASE1L3,DNER,DOC2B,DSG2,DYSF,EFCC1,EFHD1,EGFL7,EHD3,FBLN1,FBLN2,GAS6,HEG1,HMCN1,HMCN2,ITLN1,JAG2,KCNIP2,LPL,LTBP1,MASP1,MATN2,MCTP1,MEGF6,MMRN1,NELL2,NKD1,NOTCH4,NRXN1,PAMR1,PCDH1,PCDH12,PCDH15,PCDH17,PCDH19,PCDH20,PKD2,PLA2G2A,PLCB1,PLCB4,PRRG3,RYR2,RYR3,S100B,SELL,SELP,SLC8A1,SLIT2,STAB2,SVEP1,SYT17,THBS4,TLL1…
GO:MF	signaling receptor binding	GO:0005102	TRUE	1.71e-07	6.76796	1556	774	110	20171	ACE,ACTN2,ACTN4,ADAM22,ADIPOQ,AGTR1,AGTR2,AKAP5,ANGPT1,ANGPTL7,APOB,AVPR1A,BDNF,BMP3,BMP6,BMP7,BTC,C1QTNF9,C3,CAMK2A,CCL15-CCL14,CCL21,CCL3,CDH5,CNTFR,CTHRC1,CX3CR1,CXCL14,CYTL1,DKK2,DLL4,DNER,DPP4,DTX1,ECM2,EDNRB,EGFL7,EPHA7,ERBB3,FABP4,FBLN1,FCRL6,FGF10,FGF12,FGF9,FLRT2,FLRT3,FNDC5,FZD7,FZD8,GABRB1,GAS6,GFRA1,GPRC5B,GREM2,GRIP2,HBEGF,HYAL2,ICAM2,IDUA,IGF1,IGF2,IGFBP6,IL16,ITGA6,ITGB4,ITGB8,JAG2…
GO:MF	protein binding	GO:0005515	FALSE	2.53e-07	6.59605	14778	774	639	20171	ABCD2,ABCG2,ABI3BP,ABLIM1,ACACB,ACE,ACKR3,ACKR4,ACOT11,ACTA2,ACTC1,ACTN2,ACTN4,ACVR1C,ACVRL1,ADAM22,ADAM33,ADAMTS7,ADAMTSL5,ADCY1,ADCY4,ADCYAP1R1,ADIPOQ,ADRA1B,ADRB2,AFAP1L1,AFAP1L2,AGTR1,AGTR2,AJUBA,AKAP5,ALDH1A1,ALPL,AMIGO2,AMOTL2,AMT,ANGPT1,ANGPTL5,ANGPTL7,ANKRD29,ANKRD6,ANO5,ANXA3,APLNR,APOB,APOD,AQP7,ARHGEF15,ARL4A,ARVCF,ASAP3,ASB2,ASPA,ASPN,ATP1B2,ATP6V1C2,ATP8A1,AVPR1A,AZGP1,B3GALT4,BACH2,…
GO:MF	transmembrane receptor protein kinase activity	GO:0019199	TRUE	8.07224e-06	5.09301	82	774	17	20171	ACVR1C,ACVRL1,CRIM1,EPHA3,EPHA5,EPHA7,EPHB4,ERBB3,FGFR2,FLT1,FLT4,KDR,LTBP1,NTRK2,ROR2,TEK,TIE1
GO:MF	heparin binding	GO:0008201	TRUE	3.704e-05	4.43133	173	774	24	20171	ABI3BP,APOB,BMP7,CLEC3B,COLQ,ECM2,FGF10,FGF12,FGF9,FGFR2,GREM2,HBEGF,IMPG2,LPL,NELL2,NOV,RSPO2,RSPO3,SELL,SELP,SFRP1,SLIT2,THBS4,TNXB
GO:MF	chemorepellent activity	GO:0045499	FALSE	4.88613e-05	4.31103	29	774	10	20171	DPP4,EPHA7,FLRT2,FLRT3,SEMA3A,SEMA3D,SEMA3E,SEMA3G,SEMA5B,SEMA6A
GO:MF	glycosaminoglycan binding	GO:0005539	FALSE	5.13876e-05	4.28914	244	774	29	20171	ABI3BP,APOB,BMP7,CLEC3B,COLQ,DCN,ECM2,FGF10,FGF12,FGF9,FGFR2,GREM2,HBEGF,HYAL2,IMPG2,LPL,NELL2,NOV,PODXL2,RSPO2,RSPO3,SELL,SELP,SFRP1,SLIT2,STAB2,THBS4,TNXB,VIT
GO:MF	transmembrane receptor protein tyrosine kinase activity	GO:0004714	FALSE	6.30456e-05	4.20035	63	774	14	20171	CRIM1,EPHA3,EPHA5,EPHA7,EPHB4,ERBB3,FGFR2,FLT1,FLT4,KDR,NTRK2,ROR2,TEK,TIE1
GO:MF	sulfur compound binding	GO:1901681	FALSE	0.000414397	3.38258	269	774	29	20171	ABI3BP,ACACB,ACOT11,APOB,BMP7,CD34,CLEC3B,COLQ,ECM2,FGF10,FGF12,FGF9,FGFR2,GREM2,HBEGF,IMPG2,LPL,N6AMT1,NELL2,NOV,RSPO2,RSPO3,RYR2,SELL,SELP,SFRP1,SLIT2,THBS4,TNXB
GO:MF	growth factor binding	GO:0019838	TRUE	0.000507758	3.29434	132	774	19	20171	ACVR1C,ACVRL1,CHRDL1,CRIM1,EPHA7,ERBB3,FGFR2,FLT1,FLT4,HYAL2,IGFBP6,IGFBPL1,ITGA6,ITGB4,KAZALD1,KDR,LTBP1,NTRK2,PDGFB
GO:MF	monoatomic ion gated channel activity	GO:0022839	TRUE	0.00101392	2.994	328	774	32	20171	CLIC2,CLIC5,GABRA4,GABRB1,GRIA1,GRIA2,GRIK3,GRIN2A,KCNA4,KCNA6,KCNB1,KCND2,KCNH2,KCNIP2,KCNJ3,KCNK5,KCNMB2,KCNN3,PEX5L,PIEZO2,PKD2,RYR2,RYR3,SCN2B,SCN3A,SCN4B,SCN7A,SCN9A,SCNN1B,SLC1A7,TMEM150C,TRPM3
GO:MF	gated channel activity	GO:0022836	FALSE	0.00115653	2.93684	330	774	32	20171	CLIC2,CLIC5,GABRA4,GABRB1,GRIA1,GRIA2,GRIK3,GRIN2A,KCNA4,KCNA6,KCNB1,KCND2,KCNH2,KCNIP2,KCNJ3,KCNK5,KCNMB2,KCNN3,PEX5L,PIEZO2,PKD2,RYR2,RYR3,SCN2B,SCN3A,SCN4B,SCN7A,SCN9A,SCNN1B,SLC1A7,TMEM150C,TRPM3
GO:MF	signaling receptor regulator activity	GO:0030545	FALSE	0.00196531	2.70657	543	774	44	20171	ADIPOQ,AGTR2,BDNF,BMP3,BMP6,BMP7,BTC,C1QTNF9,CCL15-CCL14,CCL21,CCL3,CXCL14,DKK2,DPP4,EPHA7,FGF10,FGF12,FGF9,FLRT2,FLRT3,FNDC5,GAS6,GREM2,HBEGF,IGF1,IGF2,IL16,JAG2,LEFTY2,MRAP2,NOV,OGN,PDGFB,SCG2,SEMA3A,SEMA3D,SEMA3E,SEMA3G,SEMA5B,SEMA6A,TGFB2,THBS4,TNFSF10,WNT5A
GO:MF	monoatomic ion channel activity	GO:0005216	FALSE	0.00252475	2.59778	443	774	38	20171	ANO5,CLIC2,CLIC5,GABRA4,GABRB1,GPM6A,GRIA1,GRIA2,GRIK3,GRIN2A,KCNA4,KCNA6,KCNB1,KCND2,KCNH2,KCNIP2,KCNJ3,KCNK5,KCNMB2,KCNN3,PEX5L,PIEZO2,PKD2,RYR2,RYR3,SCN2B,SCN3A,SCN4B,SCN7A,SCN9A,SCNN1B,SLC1A7,SLC24A4,TMEM150C,TMEM175,TRPC6,TRPM3,TRPM6
GO:MF	molecular transducer activity	GO:0060089	FALSE	0.00257077	2.58994	1489	774	92	20171	ACKR3,ACKR4,ACVR1C,ACVRL1,ADCYAP1R1,ADRA1B,ADRB2,AGTR1,AGTR2,APLNR,AVPR1A,CALCRL,CD300LG,CD69,CLEC1A,CNTFR,CRIM1,CX3CR1,DAPL1,DNER,EDNRB,EPHA3,EPHA5,EPHA7,EPHB4,ERBB3,ESR1,FCRL6,FGFR2,FLT1,FLT4,FZD7,FZD8,GABRA4,GABRB1,GFRA1,GPER1,GPR153,GPRC5B,GRIA1,GRIA2,GRIK3,GRIN2A,HCAR1,HLA-DOA,IL12RB2,IL17RD,IL31RA,ITGB8,KDR,L1CAM,LGR5,LPAR4,LRRN2,LTBP1,MPL,MRGPRF,MYOT,NOTCH4,NPR3,NPY1R,NPY5R,NR1D2,NR4A1,NR4…
GO:MF	signaling receptor activity	GO:0038023	FALSE	0.00257077	2.58994	1489	774	92	20171	ACKR3,ACKR4,ACVR1C,ACVRL1,ADCYAP1R1,ADRA1B,ADRB2,AGTR1,AGTR2,APLNR,AVPR1A,CALCRL,CD300LG,CD69,CLEC1A,CNTFR,CRIM1,CX3CR1,DAPL1,DNER,EDNRB,EPHA3,EPHA5,EPHA7,EPHB4,ERBB3,ESR1,FCRL6,FGFR2,FLT1,FLT4,FZD7,FZD8,GABRA4,GABRB1,GFRA1,GPER1,GPR153,GPRC5B,GRIA1,GRIA2,GRIK3,GRIN2A,HCAR1,HLA-DOA,IL12RB2,IL17RD,IL31RA,ITGB8,KDR,L1CAM,LGR5,LPAR4,LRRN2,LTBP1,MPL,MRGPRF,MYOT,NOTCH4,NPR3,NPY1R,NPY5R,NR1D2,NR4A1,NR4…
GO:MF	receptor ligand activity	GO:0048018	FALSE	0.00321364	2.493	500	774	41	20171	ADIPOQ,BDNF,BMP3,BMP6,BMP7,BTC,C1QTNF9,CCL15-CCL14,CCL21,CCL3,CXCL14,DPP4,EPHA7,FGF10,FGF12,FGF9,FLRT2,FLRT3,FNDC5,GAS6,GREM2,HBEGF,IGF1,IGF2,IL16,JAG2,LEFTY2,NOV,OGN,PDGFB,SCG2,SEMA3A,SEMA3D,SEMA3E,SEMA3G,SEMA5B,SEMA6A,TGFB2,THBS4,TNFSF10,WNT5A
GO:MF	signaling receptor activator activity	GO:0030546	FALSE	0.00473068	2.32508	508	774	41	20171	ADIPOQ,BDNF,BMP3,BMP6,BMP7,BTC,C1QTNF9,CCL15-CCL14,CCL21,CCL3,CXCL14,DPP4,EPHA7,FGF10,FGF12,FGF9,FLRT2,FLRT3,FNDC5,GAS6,GREM2,HBEGF,IGF1,IGF2,IL16,JAG2,LEFTY2,NOV,OGN,PDGFB,SCG2,SEMA3A,SEMA3D,SEMA3E,SEMA3G,SEMA5B,SEMA6A,TGFB2,THBS4,TNFSF10,WNT5A
GO:MF	integrin binding	GO:0005178	FALSE	0.00767393	2.11498	158	774	19	20171	ACTN2,ACTN4,ADAM22,ECM2,FBLN1,GFRA1,ICAM2,IGF1,IGF2,ITGA6,ITGB4,ITGB8,KDR,NOV,THBS4,THY1,TNXB,TSPAN8,VWF
GO:MF	scavenger receptor activity	GO:0005044	TRUE	0.0082394	2.0841	48	774	10	20171	ACKR3,ACKR4,CFI,MEGF10,PRSS12,SCARA5,SCARF1,SCARF2,SSC5D,STAB2
GO:MF	calmodulin binding	GO:0005516	TRUE	0.00864021	2.06348	203	774	22	20171	ACE,ADCY1,AKAP5,CAMK2A,CNN1,CNN2,GEM,KCNN3,MYH10,MYO3A,MYO5B,MYO5C,NOS3,PLCB1,REM1,RYR2,RYR3,SLC24A4,SLC8A1,SPTBN1,TTN,WFS1
GO:MF	molecular function regulator activity	GO:0098772	FALSE	0.0134115	1.87252	2006	774	113	20171	ADIPOQ,ADRB2,AFAP1L2,AGTR2,ALDH1A1,ANXA3,ARHGAP28,ARHGEF15,ASAP3,ATP1B2,BDNF,BMP3,BMP6,BMP7,BTC,C1QTNF9,C3,CCL15-CCL14,CCL21,CCL3,CDKN1C,COL28A1,CRIM1,CXCL14,DENND2A,DGKI,DKK2,DMPK,DNAJB4,DPM3,DPP4,EPHA7,ERBB3,ESR1,FBLN1,FGD5,FGF10,FGF12,FGF9,FLRT2,FLRT3,FNDC5,FRMD7,FXYD6,GAS6,GEM,GPC3,GPD1L,GPIHBP1,GPLD1,GPRC5B,GREM2,HBEGF,HYAL2,ID4,IGF1,IGF2,IL16,ITIH5,JAG2,JUN,KCNIP2,KCNMB2,LEFTY2,MAP2K6,MDFI,…
GO:MF	channel activity	GO:0015267	FALSE	0.0157165	1.80364	498	774	39	20171	ANO5,AQP7,CLIC2,CLIC5,GABRA4,GABRB1,GPM6A,GRIA1,GRIA2,GRIK3,GRIN2A,KCNA4,KCNA6,KCNB1,KCND2,KCNH2,KCNIP2,KCNJ3,KCNK5,KCNMB2,KCNN3,PEX5L,PIEZO2,PKD2,RYR2,RYR3,SCN2B,SCN3A,SCN4B,SCN7A,SCN9A,SCNN1B,SLC1A7,SLC24A4,TMEM150C,TMEM175,TRPC6,TRPM3,TRPM6
GO:MF	passive transmembrane transporter activity	GO:0022803	FALSE	0.0164395	1.78411	499	774	39	20171	ANO5,AQP7,CLIC2,CLIC5,GABRA4,GABRB1,GPM6A,GRIA1,GRIA2,GRIK3,GRIN2A,KCNA4,KCNA6,KCNB1,KCND2,KCNH2,KCNIP2,KCNJ3,KCNK5,KCNMB2,KCNN3,PEX5L,PIEZO2,PKD2,RYR2,RYR3,SCN2B,SCN3A,SCN4B,SCN7A,SCN9A,SCNN1B,SLC1A7,SLC24A4,TMEM150C,TMEM175,TRPC6,TRPM3,TRPM6
GO:MF	nuclear receptor activity	GO:0004879	TRUE	0.0173489	1.76073	52	774	10	20171	ESR1,NR1D2,NR4A1,NR4A2,NR5A2,PGR,PPARG,RARB,RXRG,THRB
GO:MF	ligand-activated transcription factor activity	GO:0098531	FALSE	0.0173489	1.76073	52	774	10	20171	ESR1,NR1D2,NR4A1,NR4A2,NR5A2,PGR,PPARG,RARB,RXRG,THRB
GO:MF	actin binding	GO:0003779	TRUE	0.0179516	1.7459	447	774	36	20171	ABLIM1,ACTN2,ACTN4,AJUBA,CAP2,CNN1,CNN2,COBL,CORO6,CTNNA3,DIAPH3,DSTN,FAM107A,FSCN1,KLHL3,LDB3,MYH10,MYO15B,MYO3A,MYO5B,MYO5C,MYOM1,MYOT,MYRIP,NEBL,NEXN,NOS3,PDLIM7,POF1B,PPP1R9A,SHROOM3,SPTBN1,TMOD2,TNNT2,TPM1,TTN
GO:MF	structural constituent of muscle	GO:0008307	TRUE	0.0217667	1.66221	43	774	9	20171	ACTN2,CSRP1,MYOM1,MYOT,NEBL,NEXN,SORBS2,TPM1,TTN
GO:MF	calcitonin family receptor activity	GO:0097642	TRUE	0.0219835	1.6579	6	774	4	20171	CALCRL,RAMP1,RAMP2,RAMP3
GO:MF	Notch binding	GO:0005112	FALSE	0.0226622	1.6447	25	774	7	20171	DLL4,DNER,DTX1,JAG2,MEGF10,NOTCH4,NOV
GO:MF	monoatomic cation channel activity	GO:0005261	FALSE	0.0242018	1.61615	331	774	29	20171	GPM6A,GRIK3,GRIN2A,KCNA4,KCNA6,KCNB1,KCND2,KCNH2,KCNIP2,KCNJ3,KCNK5,KCNMB2,KCNN3,PEX5L,PIEZO2,PKD2,RYR2,RYR3,SCN2B,SCN3A,SCN4B,SCN7A,SCN9A,SCNN1B,SLC24A4,TMEM175,TRPC6,TRPM3,TRPM6
GO:MF	G protein-coupled peptide receptor activity	GO:0008528	FALSE	0.0280388	1.55224	144	774	17	20171	ACKR3,ACKR4,ADCYAP1R1,AGTR1,AGTR2,APLNR,AVPR1A,CALCRL,CX3CR1,EDNRB,NPR3,NPY1R,NPY5R,RAMP1,RAMP2,RAMP3,SORCS1
GO:MF	transmembrane signaling receptor activity	GO:0004888	FALSE	0.0330588	1.48071	1271	774	77	20171	ACKR3,ACKR4,ACVR1C,ACVRL1,ADCYAP1R1,ADRA1B,ADRB2,AGTR1,AGTR2,APLNR,AVPR1A,CALCRL,CD300LG,CD69,CLEC1A,CNTFR,CRIM1,CX3CR1,DAPL1,DNER,EDNRB,EPHA3,EPHA5,EPHA7,EPHB4,ERBB3,FCRL6,FGFR2,FLT1,FLT4,FZD7,FZD8,GABRA4,GABRB1,GFRA1,GPER1,GPR153,GPRC5B,GRIA1,GRIA2,GRIK3,GRIN2A,HCAR1,HLA-DOA,IL12RB2,IL17RD,IL31RA,KDR,L1CAM,LGR5,LPAR4,LTBP1,MPL,MRGPRF,MYOT,NPR3,NPY1R,NPY5R,NRXN1,NTRK2,OR51E1,P2RY14,PECAM1,PPARG,…
GO:MF	monoatomic ion transmembrane transporter activity	GO:0015075	FALSE	0.0346217	1.46065	725	774	50	20171	ANO5,ATP6V0E2,ATP6V1C2,ATP8A1,CLIC2,CLIC5,COX1,COX3,CYTB,GABRA4,GABRB1,GPM6A,GRIA1,GRIA2,GRIK3,GRIN2A,KCNA4,KCNA6,KCNB1,KCND2,KCNH2,KCNIP2,KCNJ3,KCNK5,KCNMB2,KCNN3,PEX5L,PIEZO2,PKD2,RYR2,RYR3,SCN2B,SCN3A,SCN4B,SCN7A,SCN9A,SCNN1B,SLC10A4,SLC1A7,SLC24A4,SLC26A4,SLC26A5,SLC5A4,SLC8A1,TMEM150C,TMEM175,TRPC6,TRPM3,TRPM6,TUSC3
GO:MF	protein tyrosine kinase activity	GO:0004713	FALSE	0.0365266	1.43739	147	774	17	20171	CRIM1,EPHA3,EPHA5,EPHA7,EPHB4,ERBB3,FGFR2,FLT1,FLT4,KDR,MAP2K6,NTRK2,PKDCC,ROR2,TEK,TIE1,TTN
GO:MF	adrenomedullin receptor activity	GO:0001605	FALSE	0.0407888	1.38946	3	774	3	20171	CALCRL,RAMP2,RAMP3
GO:MF	cell adhesion molecule binding	GO:0050839	FALSE	0.0471546	1.32648	561	774	41	20171	ACTN2,ACTN4,ADAM22,ARVCF,CDH2,CDH23,CDH5,CDH8,CNN2,CNTN4,CTNNA3,DIAPH3,DSCAML1,DSG2,DSP,ECM2,FBLN1,FSCN1,GFRA1,ICAM2,IGF1,IGF2,ITGA6,ITGB4,ITGB8,KDR,MPP7,NEXN,NOV,NRXN1,PROM1,PTPRB,ROBO4,SPTBN1,STXBP6,THBS4,THY1,TNXB,TRIM29,TSPAN8,VWF
GO:MF	actinin binding	GO:0042805	TRUE	0.047169	1.32634	37	774	8	20171	CSRP1,LDB3,MYOT,PDLIM7,PKD2,PPARG,PROM1,TTN
GO:MF	peptide receptor activity	GO:0001653	FALSE	0.0472093	1.32597	150	774	17	20171	ACKR3,ACKR4,ADCYAP1R1,AGTR1,AGTR2,APLNR,AVPR1A,CALCRL,CX3CR1,EDNRB,NPR3,NPY1R,NPY5R,RAMP1,RAMP2,RAMP3,SORCS1
GO:MF	growth factor activity	GO:0008083	FALSE	0.0481654	1.31726	165	774	18	20171	BDNF,BMP3,BMP6,BMP7,BTC,FGF10,FGF12,FGF9,HBEGF,IGF1,IGF2,JAG2,LEFTY2,NOV,OGN,PDGFB,TGFB2,THBS4
GO:BP	system development	GO:0048731	TRUE	8.22e-46	45.085	3962	751	312	21128	ABCA3,ABCD2,ABI3BP,ACACB,ACE,ACKR3,ACTA2,ACTC1,ACTN2,ACVR1C,ACVRL1,ADAM22,ADAMTS18,ADAMTS6,ADAMTS7,ADCY1,ADIPOQ,AGTR1,AGTR2,ALDH1A2,ALPL,AMIGO2,AMOTL2,ANGPT1,ANGPTL7,ANXA3,APLNR,APOB,APOD,ARHGEF15,ASB2,ASPA,ATP1B2,AVPR1A,BCHE,BDNF,BMP3,BMP6,BMP7,BRINP3,C3,C3ORF70,CABLES1,CALCRL,CAMK2A,CARD10,CASZ1,CBLN1,CCDC141,CCL3,CCM2L,CD248,CD34,CDH2,CDH23,CDH5,CDKN1C,CHODL,CHRDL1,CKB,CLDN5,CLEC14A,CLEC3A,CLS…
GO:BP	anatomical structure development	GO:0048856	FALSE	1.13e-44	43.9478	5861	751	394	21128	ABCA3,ABCD2,ABI3BP,ABLIM1,ACACB,ACE,ACKR3,ACTA2,ACTC1,ACTG2,ACTN2,ACTN4,ACVR1C,ACVRL1,ADAM22,ADAMTS18,ADAMTS6,ADAMTS7,ADCY1,ADCYAP1R1,ADIPOQ,ADRB2,AFF3,AGTR1,AGTR2,AJUBA,ALDH1A2,ALPL,AMIGO2,AMOTL2,ANGPT1,ANGPTL7,ANKRD6,ANXA3,APLNR,APOB,APOD,ARHGEF15,ASB2,ASPA,ASPN,ATP1B2,AVPR1A,BCHE,BDNF,BMP3,BMP6,BMP7,BRINP3,C3,C3ORF70,C6,CABLES1,CALCRL,CAMK2A,CAP2,CARD10,CASZ1,CAV2,CBFA2T3,CBLN1,CCDC141,CCDC42,…
GO:BP	developmental process	GO:0032502	FALSE	9.76e-44	43.0105	6446	751	416	21128	ABCA3,ABCD2,ABI3BP,ABLIM1,ACACB,ACE,ACKR3,ACTA2,ACTC1,ACTG2,ACTN2,ACTN4,ACVR1C,ACVRL1,ADAM22,ADAMTS18,ADAMTS6,ADAMTS7,ADCY1,ADCYAP1R1,ADIPOQ,ADRB2,AFF3,AGTR1,AGTR2,AJUBA,ALDH1A2,ALPL,AMIGO2,AMOTL2,ANGPT1,ANGPTL7,ANKRD6,ANXA3,APLNR,APOB,APOD,ARHGEF15,ARL4A,ASB2,ASPA,ASPN,ATP1B2,AVPR1A,BCHE,BCL6B,BDNF,BMP3,BMP6,BMP7,BRINP3,C1QTNF3,C3,C3ORF70,C6,CABLES1,CALCRL,CAMK2A,CAP2,CARD10,CASZ1,CAV2,CBFA2T3,C…
GO:BP	multicellular organismal process	GO:0032501	FALSE	1.23e-43	42.9097	7657	751	463	21128	ABCA3,ABCD2,ABCG2,ABI3BP,ABLIM1,ACACB,ACE,ACKR3,ACOT11,ACTA2,ACTC1,ACTG2,ACTN2,ACVR1C,ACVRL1,ADAM22,ADAMTS18,ADAMTS6,ADAMTS7,ADCY1,ADCYAP1R1,ADIPOQ,ADRA1B,ADRB2,AFAP1L2,AFF3,AGTR1,AGTR2,ALDH1A1,ALDH1A2,ALPL,AMIGO2,AMOTL2,ANGPT1,ANGPTL7,ANXA3,APLNR,APOB,APOD,ARHGEF15,ASB2,ASPA,ASPN,ATP1B2,ATP8A1,AVPR1A,AZGP1,BCHE,BCL6B,BDNF,BMP3,BMP6,BMP7,BRINP3,C1QTNF3,C3,C3ORF70,C6,CABLES1,CALCRL,CAMK2A,CARD10,C…
GO:BP	multicellular organism development	GO:0007275	FALSE	1.96e-43	42.7086	4627	751	338	21128	ABCA3,ABCD2,ABI3BP,ACACB,ACE,ACKR3,ACTA2,ACTC1,ACTN2,ACVR1C,ACVRL1,ADAM22,ADAMTS18,ADAMTS6,ADAMTS7,ADCY1,ADCYAP1R1,ADIPOQ,ADRB2,AFF3,AGTR1,AGTR2,ALDH1A2,ALPL,AMIGO2,AMOTL2,ANGPT1,ANGPTL7,ANXA3,APLNR,APOB,APOD,ARHGEF15,ASB2,ASPA,ASPN,ATP1B2,AVPR1A,BCHE,BDNF,BMP3,BMP6,BMP7,BRINP3,C3,C3ORF70,C6,CABLES1,CALCRL,CAMK2A,CARD10,CASZ1,CBLN1,CCDC141,CCL3,CCM2L,CD248,CD34,CDH2,CDH23,CDH5,CDKN1C,CHODL,CHRDL1…
GO:BP	anatomical structure morphogenesis	GO:0009653	FALSE	8.91e-42	41.05	2697	751	241	21128	ABLIM1,ACE,ACKR3,ACTA2,ACTC1,ACTG2,ACTN2,ACVRL1,ADCY1,ADIPOQ,AFF3,AGTR1,AGTR2,AJUBA,ALDH1A2,ALPL,AMOTL2,ANGPT1,ANKRD6,ANXA3,APLNR,APOB,APOD,ARHGEF15,ASB2,ASPN,BDNF,BMP6,BMP7,C3,CALCRL,CAP2,CARD10,CBLN1,CCDC141,CCL3,CCM2L,CD248,CD34,CDH2,CDH23,CDH5,CDH8,CDKN1C,CHODL,CLDN5,CLEC14A,CNTN4,COBL,COCH,COL12A1,COL15A1,CRIP1,CRISPLD1,CSRP1,CTHRC1,CX3CR1,DACT1,DCLK1,DCN,DGCR6,DLL4,DSCAML1,DSP,DUSP4,ECSCR,E…
GO:BP	animal organ development	GO:0048513	FALSE	1.58e-37	36.8015	3109	751	254	21128	ABCA3,ABI3BP,ABLIM1,ACACB,ACE,ACTA2,ACTC1,ACTG2,ACTN2,ACVRL1,ADAMTS18,ADAMTS6,ADAMTS7,ADCY1,ADIPOQ,ADRB2,AGTR1,AGTR2,ALDH1A2,ALPL,AMIGO2,ANGPT1,ANGPTL7,ANKRD6,ANXA3,APLNR,APOD,ARHGEF15,ASB2,ASPN,ATP1B2,AVPR1A,BMP3,BMP6,BMP7,CALCRL,CAV2,CBLN1,CCDC141,CCL3,CCM2L,CD248,CD34,CDH2,CDH23,CDKN1C,CHODL,CHRDL1,CKB,CLDN5,CLEC3B,CNTFR,CNTN4,COBL,COX1,CRIP1,CTHRC1,CTSK,CX3CR1,CXCL14,CYTL1,DACT1,DCLK1,DCN,DES…
GO:BP	circulatory system development	GO:0072359	FALSE	4.09e-37	36.3879	1118	751	140	21128	ABI3BP,ACACB,ACE,ACKR3,ACTA2,ACTC1,ACTN2,ACVRL1,ADAMTS6,AGTR1,ALDH1A2,AMOTL2,ANGPT1,ANGPTL7,ANXA3,APLNR,APOB,APOD,ARHGEF15,ASB2,BMP7,C3,CALCRL,CARD10,CCM2L,CD34,CDH2,CDH5,CLDN5,CLEC14A,COL15A1,CRIP1,CX3CR1,DCN,DLL4,DSG2,DSP,ECSCR,EGFL7,EGR2,EMCN,ENPEP,EPHB4,ERBB3,FGF10,FGF12,FGF9,FGFR2,FHL2,FLRT2,FLRT3,FLT1,FLT4,FUT1,FZD7,FZD8,GPC3,GPER1,GPLD1,HAND2,HEG1,HEY1,HHEX,HOXB3,IGF1,ISL1,ITGB8,JUN,KDR,KL…
GO:BP	cell differentiation	GO:0030154	FALSE	1.67e-29	28.7775	4287	751	292	21128	ABI3BP,ACE,ACKR3,ACTA2,ACTC1,ACTN2,ACTN4,ACVR1C,ACVRL1,ADAM22,ADAMTS7,ADCY1,ADCYAP1R1,ADIPOQ,ADRB2,AGTR1,ALDH1A2,ALPL,ANGPT1,APLNR,APOB,APOD,ARL4A,ASB2,ASPA,ATP1B2,AVPR1A,BCHE,BCL6B,BDNF,BMP3,BMP6,BMP7,BRINP3,C1QTNF3,C3,CAMK2A,CASZ1,CAV2,CBFA2T3,CBLN1,CCDC141,CCDC42,CCL21,CCL3,CD34,CDH2,CDH23,CDH5,CDKN1C,CHODL,CHRDL1,CLDN5,CNN2,CNTN4,COBL,COL12A1,COL15A1,CRIM1,CRIP2,CSRP1,CTHRC1,CTSK,CX3CR1,CXCL1…
GO:BP	cellular developmental process	GO:0048869	FALSE	4.87e-29	28.3122	4312	751	292	21128	ABI3BP,ACE,ACKR3,ACTA2,ACTC1,ACTN2,ACTN4,ACVR1C,ACVRL1,ADAM22,ADAMTS7,ADCY1,ADCYAP1R1,ADIPOQ,ADRB2,AGTR1,ALDH1A2,ALPL,ANGPT1,APLNR,APOB,APOD,ARL4A,ASB2,ASPA,ATP1B2,AVPR1A,BCHE,BCL6B,BDNF,BMP3,BMP6,BMP7,BRINP3,C1QTNF3,C3,CAMK2A,CASZ1,CAV2,CBFA2T3,CBLN1,CCDC141,CCDC42,CCL21,CCL3,CD34,CDH2,CDH23,CDH5,CDKN1C,CHODL,CHRDL1,CLDN5,CNN2,CNTN4,COBL,COL12A1,COL15A1,CRIM1,CRIP2,CSRP1,CTHRC1,CTSK,CX3CR1,CXCL1…
GO:BP	vasculature development	GO:0001944	FALSE	6.89e-29	28.1615	737	751	101	21128	ACE,ACKR3,ACTA2,ACVRL1,ADAMTS6,AGTR1,ALDH1A2,AMOTL2,ANGPT1,ANGPTL7,ANXA3,APLNR,APOB,APOD,ARHGEF15,BMP7,C3,CALCRL,CARD10,CD34,CDH2,CDH5,CLDN5,CLEC14A,COL15A1,CX3CR1,DCN,DLL4,ECSCR,EGFL7,EGR2,EMCN,ENPEP,EPHB4,FGF10,FGF9,FGFR2,FLT1,FLT4,FUT1,FZD8,GPC3,GPER1,GPLD1,HAND2,HEG1,HEY1,HHEX,HOXB3,ISL1,ITGB8,JUN,KDR,KLF2,KLF4,MEOX2,MMRN2,MYOCD,NOS3,NOTCH4,NOV,NR4A1,NRARP,NRXN1,NTRK2,OSR1,PDGFB,PECAM1,PKD2,P…
GO:BP	tube morphogenesis	GO:0035239	FALSE	8.05e-29	28.0942	865	751	110	21128	ACE,ACKR3,ACVRL1,AGTR1,AGTR2,AMOTL2,ANGPT1,ANXA3,APLNR,APOB,APOD,ASB2,BMP7,C3,CALCRL,CARD10,CD34,CDH2,CDH5,CLDN5,CLEC14A,COBL,COL15A1,CTHRC1,CX3CR1,DACT1,DCN,DLL4,ECSCR,EGFL7,EMCN,ENPEP,EPHA7,EPHB4,ESR1,FGF10,FGF9,FGFR2,FLT1,FLT4,FUT1,FZD8,GPC3,GPLD1,HAND2,HEG1,HEY1,HHEX,HOXB3,ISL1,ITGB8,JUN,KDR,KLF2,KLF4,KLHL3,LGR5,MEOX2,MMRN2,MYOCD,NOS3,NOTCH4,NOV,NR4A1,NRARP,NRXN1,NTRK2,OSR1,PGR,PKD2,PLXDC1,PO…
GO:BP	tissue development	GO:0009888	FALSE	1.29e-28	27.8901	1995	751	178	21128	ACTA2,ACTC1,ACTG2,ACTN2,ACVRL1,ADAMTS7,ADIPOQ,ADRB2,AGTR2,AJUBA,ALDH1A2,ALPL,ANKRD6,APLNR,ASB2,ASPN,BMP3,BMP6,BMP7,C3,CAV2,CCL3,CD34,CDH2,CDH23,CDH5,CDKN1C,CLDN5,CLEC3B,COBL,COL12A1,COL15A1,CRIP1,CSRP1,CTHRC1,CTSK,CYTL1,DACT1,DLL4,DNER,DSG2,DSP,DUSP4,EBF2,EDNRB,EGR2,EMP1,EPHA3,EPHA7,ERBB3,ESR1,FGF10,FGF9,FGFR2,FHL2,FLRT3,FOS,FRAS1,FZD7,GAS6,GPC3,GPLD1,HAND2,HBEGF,HEG1,HEY1,HLF,HOXB3,HYAL2,ID4,IGF…
GO:BP	blood vessel development	GO:0001568	FALSE	2.19e-28	27.6605	706	751	98	21128	ACE,ACKR3,ACTA2,ACVRL1,ADAMTS6,AGTR1,ALDH1A2,AMOTL2,ANGPT1,ANXA3,APLNR,APOB,APOD,BMP7,C3,CALCRL,CARD10,CD34,CDH2,CDH5,CLDN5,CLEC14A,COL15A1,CX3CR1,DCN,DLL4,ECSCR,EGFL7,EGR2,EMCN,ENPEP,EPHB4,FGF10,FGF9,FGFR2,FLT1,FLT4,FUT1,FZD8,GPC3,GPER1,GPLD1,HAND2,HEG1,HEY1,HHEX,HOXB3,ISL1,ITGB8,JUN,KDR,KLF2,KLF4,MEOX2,MMRN2,MYOCD,NOS3,NOTCH4,NOV,NR4A1,NRARP,NRXN1,NTRK2,OSR1,PDGFB,PECAM1,PKD2,PLXDC1,PPARG,PPP1R…
GO:BP	cell migration	GO:0016477	FALSE	6.07e-27	26.2167	1502	751	147	21128	ACE,ACKR3,ACKR4,ACTA2,ACTN4,ACVR1C,ACVRL1,ADIPOQ,AGTR1,AGTR2,AJUBA,AMOTL2,ANGPT1,ANXA3,APOD,ASAP3,ASB2,ATP1B2,ATP8A1,BMP7,CAMK2A,CARD10,CCDC141,CCL15-CCL14,CCL21,CCL3,CD248,CD34,CDH2,CDH5,CH25H,CLDN5,CLEC14A,CNN2,CORO6,CTHRC1,CTNNA3,CX3CR1,CXCL14,CYGB,DACH1,DCLK1,DCN,DLL4,DNER,DPP4,EDNRB,ENPEP,EPB41L4B,EPHA3,EPHB4,FAM107A,FBLN1,FGF10,FGF9,FLRT2,FLRT3,FLT1,FLT4,FSCN1,FUT1,GAS6,GFRA1,GPC3,GPER1,GPL…
GO:BP	response to stimulus	GO:0050896	FALSE	1.63e-26	25.787	9039	751	473	21128	ABCA3,ABCD2,ABCG2,ABI3BP,ACACB,ACE,ACKR3,ACKR4,ACOT11,ACTA2,ACTN2,ACTN4,ACVR1C,ACVRL1,ADAMTS18,ADAMTS7,ADCY1,ADCY4,ADCYAP1R1,ADIPOQ,ADRA1B,ADRB2,AFAP1L2,AFF3,AGTR1,AGTR2,AJUBA,AKAP5,ALDH1A1,ALDH1A2,ALPL,AMOTL2,ANGPT1,ANGPTL7,ANKRD6,ANXA3,APLNR,APOB,APOD,ARHGAP28,ARHGEF15,ASB2,ASPN,ATP6V1C2,AVPR1A,AZGP1,BACH2,BCHE,BCL6B,BDNF,BMP3,BMP6,BMP7,BRINP3,BTC,C10ORF71,C1QTNF3,C1QTNF9,C3,C6,C7,CALCRL,CAMK2A…
GO:BP	tube development	GO:0035295	FALSE	3.2e-26	25.4951	1079	751	120	21128	ABCA3,ACE,ACKR3,ACVRL1,AGTR1,AGTR2,ALDH1A2,AMOTL2,ANGPT1,ANXA3,APLNR,APOB,APOD,ASB2,BMP7,C3,CALCRL,CARD10,CD34,CDH2,CDH5,CLDN5,CLEC14A,COBL,COL15A1,CTHRC1,CX3CR1,DACT1,DCN,DLL4,ECSCR,EDNRB,EGFL7,EMCN,ENPEP,EPHA7,EPHB4,ESR1,FGF10,FGF9,FGFR2,FLT1,FLT4,FUT1,FZD8,GPC3,GPLD1,HAND2,HEG1,HEY1,HHEX,HOXB3,ISL1,ITGB8,JUN,KDR,KLF2,KLF4,KLHL3,LGR5,MEOX2,MIXL1,MMRN2,MYOCD,NOS3,NOTCH4,NOV,NR4A1,NRARP,NRXN1,NTR…
GO:BP	cell adhesion	GO:0007155	FALSE	2.65e-25	24.5766	1521	751	145	21128	ABI3BP,ACKR3,ACTN2,ACTN4,ACVRL1,ADAM22,ADAMTS18,ADIPOQ,AJUBA,AMIGO2,ANGPT1,APOD,ARVCF,ATP1B2,AZGP1,BMP6,BMP7,CBLN1,CCDC141,CCL21,CD34,CD55,CD96,CDH2,CDH23,CDH5,CDH8,CHST10,CLDN5,CLSTN2,CNTN3,CNTN4,CNTNAP3,COL12A1,COL15A1,COL28A1,COL6A6,CSRP1,CTNNA3,CX3CR1,DGCR6,DPP4,DPT,DSCAML1,DSG2,DSP,DTX1,ECM2,EGFL7,EMCN,ENTPD1,EPB41L4B,EPHA3,EPHA7,EPHB4,ERBB3,FAM107A,FBLN1,FBLN2,FLRT2,FLRT3,FREM1,FUT1,FZD7,GA…
GO:BP	blood vessel morphogenesis	GO:0048514	FALSE	2.74e-25	24.5624	618	751	87	21128	ACE,ACKR3,ACVRL1,AGTR1,AMOTL2,ANGPT1,ANXA3,APLNR,APOB,APOD,C3,CALCRL,CARD10,CD34,CDH2,CDH5,CLDN5,CLEC14A,COL15A1,CX3CR1,DCN,DLL4,ECSCR,EGFL7,EMCN,ENPEP,EPHB4,FGF10,FGF9,FGFR2,FLT1,FLT4,FUT1,FZD8,GPLD1,HAND2,HEG1,HEY1,HHEX,HOXB3,ISL1,ITGB8,JUN,KDR,KLF2,KLF4,MEOX2,MMRN2,MYOCD,NOS3,NOTCH4,NOV,NR4A1,NRARP,NRXN1,NTRK2,PKD2,PLXDC1,PPARG,PPP1R16B,PTPRB,RAMP1,RAMP2,RASIP1,RGCC,ROBO4,RSPO3,SCG2,SEMA3E,SEM…
GO:BP	angiogenesis	GO:0001525	FALSE	1.76e-24	23.7548	528	751	79	21128	ACE,ACKR3,ACVRL1,AGTR1,AMOTL2,ANGPT1,ANXA3,APLNR,APOD,C3,CALCRL,CARD10,CD34,CDH5,CLDN5,CLEC14A,COL15A1,CX3CR1,DCN,DLL4,ECSCR,EGFL7,EMCN,ENPEP,EPHB4,FGF10,FGF9,FGFR2,FLT1,FLT4,FUT1,FZD8,GPLD1,HAND2,HEY1,HHEX,HOXB3,ISL1,ITGB8,JUN,KDR,KLF2,KLF4,MEOX2,MMRN2,NOS3,NOTCH4,NOV,NR4A1,NRARP,NRXN1,PLXDC1,PPARG,PPP1R16B,PTPRB,RAMP1,RAMP2,RASIP1,RGCC,ROBO4,RSPO3,SCG2,SEMA3E,SEMA6A,SERPINF1,SFRP1,SLIT2,SOX17,S…
GO:BP	regulation of multicellular organismal process	GO:0051239	FALSE	7.5e-24	23.1249	3004	751	219	21128	ABCD2,ABI3BP,ACACB,ACE,ACOT11,ACTA2,ACVR1C,ACVRL1,ADAMTS18,ADAMTS7,ADIPOQ,ADRA1B,ADRB2,AFAP1L2,AGTR1,AGTR2,ALDH1A1,ALPL,AMIGO2,ANGPT1,ANGPTL7,ANXA3,APLNR,APOD,ASPA,ASPN,ATP1B2,AVPR1A,BCL6B,BDNF,BMP6,BMP7,C1QTNF3,C3,CALCRL,CARD10,CASQ2,CBLN1,CCL21,CCL3,CD34,CD55,CD96,CDH5,CDKN1C,CHODL,CIDEA,CLDN5,CLIC2,CLSTN2,CNN1,CTNNA3,CTSK,CX3CR1,CYGB,DCN,DES,DLL4,DMPK,DPP4,DSG2,DSP,DTX1,EBF2,ECSCR,EDNRB,EGR2,E…
GO:BP	cell motility	GO:0048870	FALSE	2.83e-23	22.5483	1699	751	151	21128	ACE,ACKR3,ACKR4,ACTA2,ACTN4,ACVR1C,ACVRL1,ADIPOQ,AGTR1,AGTR2,AJUBA,AMOTL2,ANGPT1,ANXA3,APOB,APOD,ASAP3,ASB2,ATP1B2,ATP8A1,BMP7,CAMK2A,CARD10,CCDC141,CCL15-CCL14,CCL21,CCL3,CD248,CD34,CDH2,CDH5,CH25H,CLDN5,CLEC14A,CNN2,CORO6,CTHRC1,CTNNA3,CX3CR1,CXCL14,CYGB,DACH1,DCLK1,DCN,DLL4,DNAH14,DNER,DPP4,EDNRB,ENPEP,EPB41L4B,EPHA3,EPHB4,FAM107A,FBLN1,FGF10,FGF9,FLRT2,FLRT3,FLT1,FLT4,FSCN1,FUT1,GAS6,GFRA1,GP…
GO:BP	anatomical structure formation involved in morphogenesis	GO:0048646	FALSE	1.56e-22	21.8068	1168	751	119	21128	ACE,ACKR3,ACTC1,ACTN2,ACVRL1,AGTR1,ALDH1A2,AMOTL2,ANGPT1,ANXA3,APLNR,APOD,BMP7,C3,CALCRL,CARD10,CBLN1,CD34,CDH5,CLDN5,CLEC14A,COBL,COL12A1,COL15A1,CSRP1,CTHRC1,CX3CR1,DCN,DLL4,DUSP4,ECSCR,EGFL7,EGR2,EMCN,ENPEP,EPHB4,FGF10,FGF9,FGFR2,FHL2,FLT1,FLT4,FUT1,FZD7,FZD8,GPLD1,HAND2,HEY1,HHEX,HOXB3,ISL1,ITGB4,ITGB8,JUN,KDR,KLF2,KLF4,LDB3,MEOX1,MEOX2,MIXL1,MMRN2,MPL,NEBL,NKD1,NOS3,NOTCH4,NOV,NR4A1,NRARP,NR…
GO:BP	cell communication	GO:0007154	FALSE	1.81e-22	21.7426	6573	751	369	21128	ACE,ACKR3,ACKR4,ACOT11,ACTA2,ACTN2,ACTN4,ACVR1C,ACVRL1,ADAMTS18,ADCY1,ADCY4,ADCYAP1R1,ADIPOQ,ADRA1B,ADRB2,AFAP1L2,AGTR1,AGTR2,AJUBA,AKAP5,ALDH1A2,AMOTL2,ANGPT1,ANKRD6,APLNR,APOD,ARHGAP28,ARHGEF15,ASB2,ASPN,ATP1B2,ATP6V1C2,AVPR1A,BCHE,BDNF,BMP3,BMP6,BMP7,BTC,C10ORF71,C1QTNF3,C1QTNF9,C3,CALCRL,CAMK2A,CAP2,CARD10,CASP10,CASQ2,CAV2,CBLN1,CCL15-CCL14,CCL21,CCL3,CD34,CD55,CDH2,CDH5,CDH8,CDKN1C,CFD,CHRD…
GO:BP	regulation of developmental process	GO:0050793	FALSE	3.93e-22	21.4057	2474	751	189	21128	ABI3BP,ACACB,ACE,ACVRL1,ADAMTS7,ADIPOQ,ADRB2,AGTR1,AGTR2,AMIGO2,ANGPTL7,ANKRD6,ANXA3,APLNR,APOB,ARHGEF15,ASPA,ASPN,BCL6B,BDNF,BMP6,BMP7,BRINP3,C3,CASZ1,CBLN1,CCL3,CD34,CDH2,CDH5,CDKN1C,CHODL,CLDN5,CLSTN2,CNTN4,COBL,COCH,COLQ,CRIM1,CTHRC1,CTSK,CX3CR1,CXCL14,DACT1,DCN,DGKG,DLL4,DMPK,DTX1,ECSCR,EDNRB,EGR2,EPHA3,EPHA7,ERBB3,ESR1,FGD5,FGF10,FGF9,FGFR2,FLRT2,FLRT3,FLT1,FLT4,FNDC5,FOS,FUT1,FZD7,GAS6,GPA…
GO:BP	locomotion	GO:0040011	FALSE	4.89e-22	21.3106	1353	751	129	21128	ACE,ACKR3,ACKR4,ACTA2,ACTN4,ACVR1C,ACVRL1,ADIPOQ,AGTR1,AGTR2,AJUBA,AMOTL2,ANGPT1,ANXA3,APOD,ATP1B2,ATP8A1,BDNF,BMP7,CAMK2A,CARD10,CCDC141,CCL15-CCL14,CCL21,CCL3,CDH5,CH25H,CLDN5,CNN2,CNTN4,CX3CR1,CXCL14,CYGB,DACH1,DCN,DLL4,DPP4,DSCAML1,ECSCR,EDNRB,EGR2,EPB41L4B,EPHA3,EPHA5,EPHA7,EPHB4,FAM107A,FBLN1,FGF10,FGF9,FLRT2,FLRT3,FLT1,FLT4,FUT1,GAS6,GPER1,GPLD1,GRIN2A,HAS1,HBEGF,HYAL2,IGF1,IL16,ISL1,ITGA6…
GO:BP	cell development	GO:0048468	FALSE	1.67e-21	20.7761	2728	751	200	21128	ACE,ACTA2,ACTC1,ACTN2,ACTN4,ADAM22,ADCY1,ADIPOQ,ALDH1A2,ANGPT1,APOD,ASB2,ASPA,ATP1B2,BDNF,BMP6,BMP7,C3,CAMK2A,CAV2,CBFA2T3,CCDC141,CCDC42,CCL21,CCL3,CD34,CDH2,CDH23,CDH5,CDKN1C,CHODL,CLDN5,CNN2,CNTN4,COBL,COL15A1,CRIP2,CSRP1,CTHRC1,CTSK,CX3CR1,DCLK1,DGKG,DLL4,DNASE1L3,DNER,DPY19L2,DSCAML1,DTX1,DYSF,EDNRB,EFHD1,EGR2,EPHA3,EPHA5,EPHA7,EPHB4,ESR1,FGFR2,FHL2,FLRT2,FLRT3,FLT1,FLT4,FOS,FRMD7,FZD7,FZD8,…
GO:BP	regulation of biological quality	GO:0065008	FALSE	1.68e-21	20.7745	2790	751	203	21128	ABCA3,ACE,ACKR3,ACKR4,ACTA2,ACTN2,ACVR1C,ACVRL1,ADAM22,ADAMTS18,ADCY1,ADCYAP1R1,ADIPOQ,ADRA1B,ADRB2,AGTR1,AGTR2,AKAP5,ALDH1A1,ALDH1A2,AMIGO2,ANGPT1,APLNR,ARHGAP28,ARHGEF15,ATP1B2,ATP8A1,AVPR1A,BCHE,BDNF,BMP6,C1QL3,C1QTNF3,CAMK2A,CASQ2,CBLN1,CCL21,CD34,CD55,CDH2,CDH5,CDH8,CHRDL1,CHST10,CLDN5,CLSTN2,CNTN4,COLQ,CRABP1,CSRP1,CTNNA3,CTSK,CX3CR1,DACT1,DCN,DGKG,DGKI,DMPK,DOC2B,DPM3,DPP4,DSG2,DSP,DSTN,ED…
GO:BP	regulation of cellular process	GO:0050794	FALSE	1.22e-20	19.9131	11139	751	529	21128	ABCA3,ABCD2,ABI3BP,ACACB,ACE,ACKR3,ACKR4,ACOT11,ACTA2,ACTC1,ACTN2,ACTN4,ACVR1C,ACVRL1,ADAM22,ADAMTS18,ADAMTS7,ADCY1,ADCY4,ADCYAP1R1,ADIPOQ,ADRA1B,ADRB2,AFAP1L2,AFF3,AGTR1,AGTR2,AJUBA,AKAP5,ALDH1A2,AMIGO2,AMOTL2,ANGPT1,ANGPTL7,ANKRD6,ANXA3,APLNR,APOB,APOD,ARHGAP28,ARHGEF15,ASAP3,ASB2,ASPA,ASPN,ATP1B2,ATP6V0E2,ATP6V1C2,ATP8A1,AVPR1A,AZGP1,BACH2,BCHE,BCL6B,BDNF,BMP3,BMP6,BMP7,BRINP3,BTC,C10ORF71,C1Q…
GO:BP	animal organ morphogenesis	GO:0009887	FALSE	2.47e-20	19.6077	1070	751	109	21128	ABLIM1,ACTA2,ACTC1,ACTG2,ACVRL1,AGTR2,ALDH1A2,ALPL,ANKRD6,APLNR,ASB2,ASPN,BMP6,BMP7,CCM2L,CD34,CDH2,CDH23,CLDN5,CRIP1,CTHRC1,DACT1,DCN,DGCR6,DLL4,DSCAML1,DSP,EPHB4,ESR1,FGF10,FGF9,FGFR2,FHL1,FHL2,FLRT2,FRAS1,FREM1,FZD7,GPC3,GREM2,HAND2,HEG1,HEY1,HOXB3,HOXD8,HYAL2,ID4,IGF2,IMPG2,ISL1,ITGA6,ITGB4,JAG2,JUN,KDR,KLHL3,LIMS2,MDFI,MFAP5,MYO3A,NKD1,NOS3,NPY1R,NPY5R,NR5A2,NTRK2,OLFM1,OSR1,OSR2,PCDH15,PGR,…
GO:BP	signaling	GO:0023052	FALSE	3.14e-20	19.5033	6462	751	358	21128	ACE,ACKR3,ACKR4,ACOT11,ACTA2,ACTN2,ACTN4,ACVR1C,ACVRL1,ADAMTS18,ADCY1,ADCY4,ADCYAP1R1,ADIPOQ,ADRA1B,ADRB2,AFAP1L2,AGTR1,AGTR2,AJUBA,AKAP5,ALDH1A2,AMOTL2,ANGPT1,ANKRD6,APLNR,APOD,ARHGAP28,ARHGEF15,ASB2,ASPN,ATP6V1C2,AVPR1A,BCHE,BDNF,BMP3,BMP6,BMP7,BTC,C10ORF71,C1QTNF3,C1QTNF9,C3,CALCRL,CAMK2A,CAP2,CARD10,CASP10,CASQ2,CAV2,CBLN1,CCL15-CCL14,CCL21,CCL3,CD34,CD55,CDH2,CDH5,CDH8,CDKN1C,CFD,CHRDL1,CIDE…
GO:BP	nervous system development	GO:0007399	FALSE	7.95e-20	19.0995	2525	751	186	21128	ABCD2,ACE,ACKR3,ACVR1C,ADAM22,ADCY1,AGTR2,ALDH1A2,AMIGO2,ANXA3,APOB,APOD,ARHGEF15,ASPA,ATP1B2,AVPR1A,BCHE,BDNF,BMP6,BMP7,BRINP3,C3,C3ORF70,CABLES1,CAMK2A,CASZ1,CBLN1,CCDC141,CCL3,CDH2,CDH23,CDKN1C,CHODL,CHRDL1,CKB,CLDN5,CLSTN2,CNTFR,CNTN4,COBL,COLQ,COX1,CRIM1,CTHRC1,CX3CR1,DACT1,DCLK1,DGKG,DLL4,DNER,DRP2,DSCAML1,DTX1,EDNRB,EFHD1,EGR2,EPHA3,EPHA5,EPHA7,EPHB4,ERBB3,FGF10,FGF12,FGF9,FGFR2,FLRT2,FLRT…
GO:BP	heart development	GO:0007507	FALSE	2.68e-19	18.5711	590	751	76	21128	ABI3BP,ACACB,ACE,ACTC1,ACTN2,ACVRL1,ADAMTS6,ALDH1A2,APLNR,ASB2,BMP7,CALCRL,CCM2L,CLDN5,CRIP1,DLL4,DSG2,DSP,EPHB4,ERBB3,FGF12,FGF9,FGFR2,FHL2,FLRT2,FLRT3,FZD7,GPC3,GPER1,HAND2,HEG1,HEY1,IGF1,ISL1,JUN,KDR,LDB3,MIXL1,MYOCD,NEBL,NOS3,NPY1R,NPY5R,OLFM1,OSR1,OXCT1,PDGFB,PDLIM7,PI16,PKD2,PLN,PPARG,PRICKLE1,RAMP2,RARB,RBM24,RXRG,RYR2,SGCD,SGCG,SIX1,SLC8A1,SLIT2,SORBS2,SOX17,SOX18,SOX6,TEK,TGFB2,TIE1,TMEM…
GO:BP	regulation of cell communication	GO:0010646	FALSE	3.84e-19	18.416	3388	751	225	21128	ACE,ACKR3,ACTA2,ACTN4,ACVR1C,ACVRL1,ADCY1,ADCYAP1R1,ADIPOQ,ADRA1B,ADRB2,AFAP1L2,AGTR1,AGTR2,AJUBA,AKAP5,ANGPT1,ANKRD6,APLNR,APOD,ARHGAP28,ARHGEF15,ASPN,ATP6V1C2,AVPR1A,BCHE,BDNF,BMP3,BMP6,BMP7,BTC,C10ORF71,C1QTNF3,C3,CAMK2A,CASP10,CASQ2,CAV2,CBLN1,CCL21,CCL3,CD55,CDH2,CDH5,CDKN1C,CHRDL1,CIDEA,CLSTN2,CNTN4,CRIM1,CTHRC1,CX3CR1,DACT1,DCN,DGKG,DGKI,DKK2,DLL4,DMPK,DNM1,DOC2B,DTX1,DUSP4,EGFL7,EGR2,EPHA…
GO:BP	regulation of biological process	GO:0050789	FALSE	9.33e-19	18.0299	12378	751	564	21128	ABCA3,ABCA8,ABCD2,ABI3BP,ACACB,ACE,ACKR3,ACKR4,ACOT11,ACTA2,ACTC1,ACTG2,ACTN2,ACTN4,ACVR1C,ACVRL1,ADAM22,ADAMTS18,ADAMTS7,ADCY1,ADCY4,ADCYAP1R1,ADIPOQ,ADRA1B,ADRB2,AFAP1L2,AFF3,AGTR1,AGTR2,AJUBA,AKAP5,ALDH1A1,ALDH1A2,ALPL,AMIGO2,AMOTL2,ANGPT1,ANGPTL7,ANKRD6,ANXA3,APLNR,APOB,APOD,ARHGAP28,ARHGEF15,ASAP3,ASB2,ASPA,ASPN,ATP1B2,ATP6V0E2,ATP6V1C2,ATP8A1,AVPR1A,AZGP1,BACH2,BCHE,BCL6B,BDNF,BMP3,BMP6,BMP…
GO:BP	regulation of cell migration	GO:0030334	FALSE	1.3e-18	17.887	926	751	97	21128	ACE,ACKR3,ACTA2,ACTN4,ACVR1C,ACVRL1,ADIPOQ,AGTR2,AJUBA,AMOTL2,ANGPT1,ANXA3,APOD,ATP1B2,ATP8A1,BMP7,CAMK2A,CARD10,CCL21,CCL3,CDH5,CLDN5,CNN2,CX3CR1,CXCL14,CYGB,DACH1,DCN,DLL4,DPP4,EPB41L4B,FAM107A,FBLN1,FGF10,FGF9,FLRT2,FLT1,FLT4,FUT1,GAS6,GPER1,GPLD1,HAS1,HBEGF,HYAL2,IGF1,ITGA6,JUN,KDR,KLF4,LDB2,MCTP1,MEOX2,MGAT3,MMP28,MMRN2,MYOC,MYOCD,NEXN,NKD1,NOS3,NOV,PDGFB,PECAM1,PLCB1,PLCG2,PLP1,PLVAP,PODN,P…
GO:BP	regulation of locomotion	GO:0040012	FALSE	2.49e-18	17.6037	1033	751	103	21128	ACE,ACKR3,ACTA2,ACTN4,ACVR1C,ACVRL1,ADIPOQ,AGTR2,AJUBA,AMOTL2,ANGPT1,ANXA3,APOD,ATP1B2,ATP8A1,BMP7,CAMK2A,CARD10,CCL21,CCL3,CDH5,CLDN5,CNN2,CX3CR1,CXCL14,CYGB,DACH1,DCN,DLL4,DPP4,EPB41L4B,FAM107A,FBLN1,FGF10,FGF9,FLRT2,FLT1,FLT4,FUT1,GAS6,GPER1,GPLD1,HAS1,HBEGF,HYAL2,IGF1,IL16,ITGA6,JUN,KDR,KLF4,LDB2,MCTP1,MEOX2,MGAT3,MMP28,MMRN2,MYOC,MYOCD,NEXN,NKD1,NOS3,NOV,NOVA2,PDGFB,PECAM1,PLCB1,PLCG2,PLP1,P…
GO:BP	positive regulation of biological process	GO:0048518	FALSE	3.95e-18	17.4037	6348	751	347	21128	ABCA3,ABCA8,ABCD2,ABI3BP,ACACB,ACE,ACKR3,ACTA2,ACTC1,ACTG2,ACTN2,ACTN4,ACVR1C,ACVRL1,ADCY1,ADCYAP1R1,ADIPOQ,ADRA1B,ADRB2,AFAP1L2,AGTR1,AGTR2,AJUBA,AKAP5,ALDH1A2,ALPL,AMIGO2,ANGPT1,ANKRD6,ANXA3,APLNR,APOB,ARHGEF15,ASPA,ATP1B2,ATP6V1C2,ATP8A1,AVPR1A,BDNF,BMP3,BMP6,BMP7,BRINP3,BTC,C10ORF71,C1QTNF3,C3,C6,C7,CALCRL,CAMK2A,CARD10,CASP10,CASQ2,CASZ1,CAV2,CBFA2T3,CBLN1,CCL21,CCL3,CD248,CD34,CD55,CDH2,CDH…
GO:BP	biological regulation	GO:0065007	FALSE	6.19e-18	17.2082	12926	751	579	21128	ABCA3,ABCA8,ABCD2,ABI3BP,ACACB,ACE,ACKR3,ACKR4,ACOT11,ACTA2,ACTC1,ACTG2,ACTN2,ACTN4,ACVR1C,ACVRL1,ADAM22,ADAMTS18,ADAMTS7,ADCY1,ADCY4,ADCYAP1R1,ADIPOQ,ADRA1B,ADRB2,AFAP1L2,AFF3,AGTR1,AGTR2,AJUBA,AKAP5,ALDH1A1,ALDH1A2,ALPL,AMIGO2,AMOTL2,ANGPT1,ANGPTL7,ANKRD6,ANXA3,APLNR,APOB,APOD,ARHGAP28,ARHGEF15,ASAP3,ASB2,ASPA,ASPN,ATP1B2,ATP6V0E2,ATP6V1C2,ATP8A1,AVPR1A,AZGP1,BACH2,BCHE,BCL6B,BDNF,BMP3,BMP6,BMP…
GO:BP	regulation of cell motility	GO:2000145	FALSE	1.19e-17	16.9252	988	751	99	21128	ACE,ACKR3,ACTA2,ACTN4,ACVR1C,ACVRL1,ADIPOQ,AGTR2,AJUBA,AMOTL2,ANGPT1,ANXA3,APOD,ATP1B2,ATP8A1,BMP7,CAMK2A,CARD10,CCL21,CCL3,CDH5,CLDN5,CNN2,CX3CR1,CXCL14,CYGB,DACH1,DCN,DLL4,DPP4,EPB41L4B,FAM107A,FBLN1,FGF10,FGF9,FLRT2,FLT1,FLT4,FUT1,GAS6,GPER1,GPLD1,HAS1,HBEGF,HYAL2,IGF1,ITGA6,JUN,KDR,KLF4,LDB2,MCTP1,MEOX2,MGAT3,MMP28,MMRN2,MYOC,MYOCD,NEXN,NKD1,NOS3,NOV,PDGFB,PECAM1,PLCB1,PLCG2,PLP1,PLVAP,PODN,P…
GO:BP	signal transduction	GO:0007165	FALSE	1.3e-17	16.8847	6012	751	332	21128	ACKR3,ACKR4,ACOT11,ACTA2,ACTN2,ACTN4,ACVR1C,ACVRL1,ADAMTS18,ADCY1,ADCY4,ADCYAP1R1,ADIPOQ,ADRA1B,ADRB2,AFAP1L2,AGTR1,AGTR2,AJUBA,AKAP5,ALDH1A2,AMOTL2,ANGPT1,ANKRD6,APLNR,APOD,ARHGAP28,ARHGEF15,ASB2,ASPN,ATP6V1C2,AVPR1A,BDNF,BMP3,BMP6,BMP7,BTC,C10ORF71,C1QTNF3,C1QTNF9,C3,CALCRL,CAMK2A,CAP2,CARD10,CASP10,CASQ2,CAV2,CBLN1,CCL15-CCL14,CCL21,CCL3,CD34,CD55,CDH2,CDH5,CDKN1C,CFD,CHRDL1,CIDEA,CLDN5,CLEC14…
GO:BP	regulation of signaling	GO:0023051	FALSE	1.72e-17	16.7654	3378	751	220	21128	ACE,ACKR3,ACTA2,ACTN4,ACVR1C,ACVRL1,ADCY1,ADCYAP1R1,ADIPOQ,ADRA1B,ADRB2,AFAP1L2,AGTR1,AGTR2,AJUBA,AKAP5,ANGPT1,ANKRD6,APLNR,APOD,ARHGAP28,ARHGEF15,ASPN,ATP6V1C2,BCHE,BDNF,BMP3,BMP6,BMP7,BTC,C10ORF71,C1QTNF3,C3,CAMK2A,CASP10,CAV2,CBLN1,CCL21,CCL3,CD55,CDH2,CDH5,CDKN1C,CHRDL1,CIDEA,CLSTN2,CNTN4,CRIM1,CTHRC1,CX3CR1,DACT1,DCN,DGKG,DGKI,DKK2,DLL4,DMPK,DNM1,DOC2B,DTX1,DUSP4,EGFL7,EGR2,EPHA5,EPHA7,ERBB3…
GO:BP	ameboidal-type cell migration	GO:0001667	FALSE	3.64e-17	16.439	429	751	61	21128	ACTA2,ACVR1C,ACVRL1,AGTR2,AMOTL2,ANGPT1,ANXA3,BMP7,CARD10,CD248,CDH2,CDH5,CLEC14A,CYGB,DCN,DLL4,DPP4,EDNRB,EPB41L4B,EPHB4,FGF10,FLT4,FUT1,GPC3,GPLD1,HAND2,HAS1,HBEGF,HYAL2,ISL1,ITGB4,JUN,KDR,KLF4,MEOX2,MIXL1,MMRN2,NOS3,NOV,NR4A1,PDGFB,PLCG2,PLEKHG5,PPARG,RGCC,SCG2,SEMA3A,SEMA3D,SEMA3E,SEMA3G,SEMA5B,SEMA6A,SERPINF1,SLC8A1,SLIT2,SOX10,SOX17,SOX18,TEK,TGFB2,WNT5A
GO:BP	cell-cell signaling	GO:0007267	FALSE	1.05e-16	15.9788	1666	751	135	21128	ACE,ACVR1C,ADCY1,ADIPOQ,ADRA1B,ADRB2,AGTR1,AKAP5,AMOTL2,ANKRD6,ATP6V1C2,BCHE,BDNF,BMP3,BMP6,C1QTNF3,C3,CAMK2A,CASQ2,CBLN1,CCL21,CCL3,CD34,CDH2,CDH8,CHRDL1,CLSTN2,CNTN4,COLQ,CPZ,CTHRC1,CX3CR1,CXCL14,DACT1,DGKI,DKK2,DMPK,DNM1,DOC2B,DRP2,EDNRB,EGR2,ENPEP,EPHA5,FAM107A,FGF10,FGF12,FGF9,FGFR2,FZD7,FZD8,GABRA4,GABRB1,GPC3,GPER1,GPLD1,GPRC5B,GRIA1,GRIA2,GRIK3,GRIN2A,HHEX,ICA1,IGFBP6,ISL1,ITGB8,KCNB1,KCN…
GO:BP	positive regulation of cellular process	GO:0048522	FALSE	1.89e-16	15.724	5657	751	314	21128	ABCA3,ABCD2,ABI3BP,ACE,ACKR3,ACTA2,ACTN2,ACTN4,ACVR1C,ACVRL1,ADCY1,ADCYAP1R1,ADIPOQ,ADRA1B,ADRB2,AFAP1L2,AGTR1,AGTR2,AJUBA,AKAP5,ALDH1A2,AMIGO2,ANGPT1,ANKRD6,ANXA3,APLNR,APOB,ARHGEF15,ASPA,ATP1B2,ATP6V1C2,ATP8A1,AVPR1A,BDNF,BMP3,BMP6,BMP7,BRINP3,BTC,C10ORF71,C1QTNF3,C3,CALCRL,CAMK2A,CARD10,CASP10,CASQ2,CASZ1,CAV2,CBFA2T3,CBLN1,CCL21,CCL3,CD248,CD34,CD55,CDH2,CDH5,CDKN1C,CHODL,CIITA,CLDN5,CLIC2,CL…
GO:BP	muscle structure development	GO:0061061	FALSE	3.08e-16	15.5119	663	751	76	21128	ACTC1,ACTN2,ACTN4,APLNR,ASB2,AVPR1A,BDNF,CAV2,CDH2,CHODL,CNTFR,CSRP1,CXCL14,DES,DLL4,DMPK,DNER,DSP,DYSF,EDNRB,EGR2,ERBB3,FGF10,FGF9,FGFR2,FHL1,FHL2,FOS,FZD7,GPER1,HBEGF,HEG1,HEY1,HLF,IGF1,IGF2,ISL1,LDB3,MEGF10,MEOX2,MKX,MYOCD,NEBL,NKD1,NOV,NR1D2,NR4A1,PDGFB,PDLIM7,PGM5,PI16,PLCB1,PRICKLE1,RAMP2,RARB,RBM24,RBM38,RBPMS2,RXRG,RYR2,SGCD,SGCG,SIX1,SLC8A1,SORBS2,SOX6,SRPK3,TCF15,TGFB2,TMEM119,TMOD2,TNN…
GO:BP	neurogenesis	GO:0022008	FALSE	3.31e-16	15.4808	1688	751	135	21128	ACE,ADAM22,ADCY1,ALDH1A2,APOD,ASPA,ATP1B2,BCHE,BDNF,BMP6,BMP7,BRINP3,C3,CAMK2A,CASZ1,CBLN1,CCDC141,CCL3,CDH2,CDH23,CDKN1C,CHODL,CNTN4,COBL,CTHRC1,CX3CR1,DCLK1,DGKG,DLL4,DNER,DSCAML1,DTX1,EDNRB,EFHD1,EGR2,EPHA3,EPHA5,EPHA7,EPHB4,ERBB3,FGF10,FGFR2,FLRT2,FLRT3,FRMD7,FZD7,FZD8,GABRB1,GAS6,GFRA1,GPER1,GPM6A,GPRC5B,GRIN2A,GRIP1,HAND2,HEY1,HOXB3,ID4,ISL1,ITGA6,ITGB4,JAG2,JUN,KCNB1,KCNIP2,KLF4,L1CAM,LGI1…
GO:BP	response to endogenous stimulus	GO:0009719	FALSE	4.06e-16	15.3914	1692	751	135	21128	ABCA3,ACE,ACTN2,ACVR1C,ACVRL1,ADAMTS7,ADIPOQ,ADRB2,AGTR1,AGTR2,ALPL,ANXA3,APOB,ASPN,AVPR1A,BCHE,BDNF,BMP6,BMP7,CAMK2A,CASQ2,CAV2,CCL21,CDH5,CDKN1C,CHRDL1,CIDEA,CKB,CLDN5,CLEC3B,CRIM1,CTSK,CX3CR1,DCN,DLL4,EDNRB,EGR2,ESR1,FAM107A,FGF10,FGF12,FGF9,FGFR2,FHL2,FLRT2,FLRT3,FLT1,FLT4,FOS,GABRB1,GAS6,GFRA1,GPC3,GPD1,GPER1,GPLD1,GREM2,HAS1,HHEX,HTRA3,HYAL2,IGF1,IGF2,IL17RD,ISL1,ITGB8,JUN,KDR,KLF2,KLF4,LBH…
GO:BP	cellular response to stimulus	GO:0051716	FALSE	5.99e-16	15.2228	7491	751	384	21128	ABCG2,ACE,ACKR3,ACKR4,ACOT11,ACTA2,ACTN2,ACTN4,ACVR1C,ACVRL1,ADAMTS18,ADAMTS7,ADCY1,ADCY4,ADCYAP1R1,ADIPOQ,ADRA1B,ADRB2,AFAP1L2,AGTR1,AGTR2,AJUBA,AKAP5,ALDH1A1,ALDH1A2,ALPL,AMOTL2,ANGPT1,ANKRD6,APLNR,APOB,APOD,ARHGAP28,ARHGEF15,ASB2,ASPN,ATP6V1C2,AVPR1A,BCHE,BDNF,BMP3,BMP6,BMP7,BRINP3,BTC,C10ORF71,C1QTNF3,C1QTNF9,C3,CALCRL,CAMK2A,CAP2,CARD10,CASP10,CASQ2,CAV2,CBLN1,CCL15-CCL14,CCL21,CCL3,CD34,CD5…
GO:BP	circulatory system process	GO:0003013	FALSE	2.49e-15	14.6044	596	751	70	21128	ABCG2,ACE,ACTA2,ACTC1,ACVRL1,ADIPOQ,ADRA1B,ADRB2,AGTR1,AGTR2,ANGPT1,ATP1B2,ATP8A1,AVPR1A,BMP6,CASQ2,CD34,CDH5,CLDN5,CLIC2,CTNNA3,DES,DLL4,DMPK,DSG2,DSP,EDNRB,EHD3,ENPEP,FGF12,GAS6,GPD1L,GPER1,GRIP2,HBB,HBEGF,HEG1,ISL1,KCNH2,KCNIP2,KCNJ3,KCNMB2,KLF2,MAP2K6,NOS3,NPR3,NPY1R,PDGFB,PLN,PLVAP,PPARG,RAMP2,RAMP3,RYR2,SCN2B,SCN4B,SCNN1B,SGCD,SGCG,SLC2A4,SLC8A1,SLIT2,SUCNR1,SVEP1,TEK,TGFB2,THRB,TNNT2,TPM1,…
GO:BP	blood circulation	GO:0008015	FALSE	3.19e-15	14.4963	511	751	64	21128	ACE,ACTA2,ACTC1,ACVRL1,ADIPOQ,ADRA1B,ADRB2,AGTR1,AGTR2,ANGPT1,ATP1B2,AVPR1A,BMP6,CASQ2,CD34,CDH5,CLDN5,CLIC2,CTNNA3,DES,DLL4,DMPK,DSG2,DSP,EDNRB,EHD3,ENPEP,FGF12,GAS6,GPD1L,GPER1,GRIP2,HBB,HBEGF,ISL1,KCNH2,KCNIP2,KCNJ3,KCNMB2,KLF2,MAP2K6,NOS3,NPR3,NPY1R,PDGFB,PLN,PLVAP,PPARG,RAMP2,RYR2,SCN2B,SCN4B,SCNN1B,SGCD,SGCG,SLC8A1,SLIT2,SUCNR1,TEK,TGFB2,THRB,TNNT2,TPM1,TTN
GO:BP	regulation of anatomical structure morphogenesis	GO:0022603	FALSE	9.89e-15	14.005	882	751	87	21128	ACVRL1,AGTR2,ANKRD6,ANXA3,APLNR,BDNF,BMP7,C3,CCL3,CD34,CDH2,CDH5,CHODL,CLDN5,COCH,CTHRC1,CX3CR1,DACT1,DCN,ECSCR,EPHA7,ESR1,FGD5,FGF10,FGFR2,FLT1,FLT4,FUT1,FZD7,GPC3,GRIP1,HHEX,ISL1,ITGB8,KDR,KLF2,KLF4,L1CAM,MMRN2,MPL,MYH10,NGEF,NKD1,NOS3,NTRK2,OSR1,PALM,PALM3,PALMD,POU3F2,PPARG,PPP1R16B,PRICKLE1,RAMP2,RELN,RGCC,RHOBTB1,ROR2,RSPO2,RSPO3,SEMA3A,SEMA3D,SEMA3E,SEMA3G,SEMA5B,SEMA6A,SERPINF1,SFRP1,SHAN…
GO:BP	negative regulation of cellular process	GO:0048523	FALSE	1.27e-14	13.897	4755	751	271	21128	ABCD2,ABI3BP,ACACB,ACE,ACKR3,ACTC1,ACTN2,ACTN4,ACVR1C,ACVRL1,ADAM22,ADAMTS18,ADAMTS7,ADCYAP1R1,ADIPOQ,ADRB2,AGTR2,AJUBA,ALDH1A2,AMIGO2,ANGPT1,ANKRD6,APLNR,APOD,ARHGAP28,ARHGEF15,ASPN,ATP1B2,AVPR1A,AZGP1,BACH2,BCHE,BCL6B,BDNF,BMP6,BMP7,BRINP3,BTC,C1QTNF3,CARD10,CASQ2,CAV2,CBFA2T3,CBLN1,CCL21,CCL3,CD34,CDH2,CDH5,CDKN1C,CH25H,CHRDL1,CIDEA,CIITA,CLDN5,CLIC2,CNN1,CNN2,CNTFR,CNTN4,CRIM1,CTHRC1,CX3CR1,C…
GO:BP	cell surface receptor signaling pathway	GO:0007166	FALSE	2e-14	13.6991	2869	751	188	21128	ACKR3,ACKR4,ACTN4,ACVR1C,ACVRL1,ADAMTS18,ADCYAP1R1,ADIPOQ,ADRB2,AFAP1L2,AGTR2,AMOTL2,ANGPT1,ANKRD6,APOD,ASPN,ATP6V1C2,BDNF,BMP3,BMP6,BMP7,BTC,C3,CALCRL,CAMK2A,CAV2,CBLN1,CCL21,CCL3,CD55,CDH2,CDH5,CDKN1C,CFD,CHRDL1,CIDEA,CLDN5,CLEC14A,CLEC1A,CNTFR,CPZ,CRIM1,CTHRC1,CX3CR1,DACT1,DCN,DGKI,DKK2,DLL4,DMPK,DNER,DTX1,EDNRB,EGFL7,EPHA3,EPHA5,EPHA7,EPHB4,ERBB3,FCRL6,FGF10,FGF12,FGF9,FGFR2,FLRT2,FLRT3,FLT1,…
GO:BP	cellular response to endogenous stimulus	GO:0071495	FALSE	2.05e-14	13.6879	1445	751	118	21128	ACE,ACTN2,ACVR1C,ACVRL1,ADAMTS7,ADIPOQ,ADRB2,AGTR1,AGTR2,APOB,ASPN,BDNF,BMP6,BMP7,CAMK2A,CASQ2,CAV2,CDH5,CDKN1C,CHRDL1,CIDEA,CKB,CLDN5,CLEC3B,CRIM1,CTSK,CX3CR1,DCN,DLL4,ESR1,FAM107A,FGF10,FGF12,FGF9,FGFR2,FLRT2,FLRT3,FLT1,FLT4,FOS,GABRB1,GAS6,GFRA1,GPC3,GPD1,GPER1,GPLD1,GREM2,HAS1,HHEX,HTRA3,HYAL2,IGF1,IGF2,IL17RD,ISL1,ITGB8,JUN,KDR,KLF2,KLF4,LBH,LDOC1,LEFTY2,LMO3,LPL,LTBP1,MGARP,MMRN2,MYOCD,NR1D…
GO:BP	generation of neurons	GO:0048699	FALSE	3.32e-14	13.479	1473	751	119	21128	ADCY1,ALDH1A2,APOD,ATP1B2,BCHE,BDNF,BMP6,BMP7,BRINP3,C3,CAMK2A,CASZ1,CBLN1,CCDC141,CDH2,CDH23,CDKN1C,CHODL,CNTN4,COBL,CTHRC1,CX3CR1,DCLK1,DGKG,DLL4,DNER,DSCAML1,DTX1,EDNRB,EFHD1,EGR2,EPHA3,EPHA5,EPHA7,EPHB4,FGFR2,FLRT2,FLRT3,FRMD7,FZD7,FZD8,GABRB1,GAS6,GFRA1,GPM6A,GPRC5B,GRIP1,HAND2,HEY1,ID4,ISL1,ITGA6,JAG2,JUN,KCNB1,KCNIP2,KLF4,L1CAM,LGI1,LGI4,LHX6,MGARP,MYOC,MYOT,NCAM1,NEGR1,NEXN,NGEF,NKD1,NOVA…
GO:BP	tissue morphogenesis	GO:0048729	FALSE	6.4e-14	13.1938	633	751	70	21128	ACTA2,ACTC1,ACTG2,ACVRL1,AGTR2,AJUBA,ALDH1A2,ANKRD6,APLNR,ASB2,BMP7,COBL,CTHRC1,DACT1,DLL4,DSP,EPHA7,ESR1,FGF10,FGFR2,FLRT3,FRAS1,FZD7,GPC3,HAND2,HBEGF,HEG1,HEY1,ID4,ISL1,ITGB4,JAG2,KDR,KLF4,KLHL3,LGR5,MMRN2,NKD1,NOS3,NOTCH4,NRARP,OSR1,PCDH15,PGR,PKD2,PODXL,PRICKLE1,RASIP1,ROR2,RSPO2,RSPO3,RYR2,SEMA3E,SFRP1,SHANK3,SHROOM3,SIX1,SLIT2,SOX10,SOX17,SOX18,TCF15,TGFB2,TIE1,TMEM100,TNNT2,TPM1,TTN,VANGL2…
GO:BP	neuron differentiation	GO:0030182	FALSE	1.06e-13	12.9758	1401	751	114	21128	ADCY1,ALDH1A2,APOD,ATP1B2,BDNF,BMP6,BMP7,BRINP3,C3,CAMK2A,CASZ1,CBLN1,CCDC141,CDH2,CDH23,CDKN1C,CHODL,CNTN4,COBL,CTHRC1,DCLK1,DGKG,DLL4,DSCAML1,DTX1,EDNRB,EFHD1,EGR2,EPHA3,EPHA5,EPHA7,EPHB4,FGFR2,FLRT2,FLRT3,FRMD7,FZD7,FZD8,GABRB1,GFRA1,GPM6A,GPRC5B,GRIP1,HAND2,HEY1,ID4,ISL1,ITGA6,JAG2,JUN,KCNB1,KCNIP2,KLF4,L1CAM,LGI1,LGI4,LHX6,MGARP,MYOC,MYOT,NCAM1,NEGR1,NEXN,NGEF,NKD1,NOVA2,NR4A2,NRBP2,NRK,NRN1…
GO:BP	regulation of signal transduction	GO:0009966	FALSE	1.52e-13	12.8195	2991	751	191	21128	ACKR3,ACTA2,ACTN4,ACVRL1,ADCYAP1R1,ADIPOQ,ADRA1B,ADRB2,AFAP1L2,AGTR2,AJUBA,AKAP5,ANGPT1,ANKRD6,APLNR,APOD,ARHGAP28,ARHGEF15,ASPN,ATP6V1C2,BDNF,BMP3,BMP6,BMP7,BTC,C10ORF71,C1QTNF3,C3,CAMK2A,CASP10,CAV2,CBLN1,CCL21,CCL3,CD55,CDH2,CDH5,CDKN1C,CHRDL1,CIDEA,CRIM1,CTHRC1,CX3CR1,DACT1,DCN,DGKG,DGKI,DKK2,DLL4,DMPK,DTX1,DUSP4,EGFL7,EPHA7,ERBB3,ESR1,FBLN1,FGD5,FGF10,FGF9,FGFR2,FHL2,FLT1,FLT4,FRMD7,FZD7,FZD…
GO:BP	system process	GO:0003008	FALSE	3.03e-13	12.5181	2280	751	157	21128	ABCG2,ABLIM1,ACE,ACTA2,ACTC1,ACVRL1,ADCY1,ADIPOQ,ADRA1B,ADRB2,AGTR1,AGTR2,ANGPT1,ATP1B2,ATP8A1,AVPR1A,AZGP1,BCHE,BDNF,BMP6,C1QTNF3,CALCRL,CASQ2,CBLN1,CCL3,CD34,CDH23,CDH5,CHST10,CLDN5,CLIC2,CLIC5,CNN1,COCH,CTNNA3,CX3CR1,DAPL1,DES,DGKI,DLL4,DMPK,DSG2,DSP,ECEL1,EDNRB,EGR2,EHD3,ENPEP,FAM107A,FGF10,FGF12,FLT4,FOS,GABRA4,GABRB1,GAS6,GATM,GPD1L,GPER1,GRIA1,GRIN2A,GRIP2,HAND2,HBB,HBEGF,HEG1,HMCN1,HYAL2,…
GO:BP	regulation of multicellular organismal development	GO:2000026	FALSE	7.06e-13	12.1511	1400	751	112	21128	ACACB,ACE,ACVRL1,ADAMTS7,ADIPOQ,ADRB2,AMIGO2,ANGPTL7,ANXA3,APLNR,ASPA,ASPN,BDNF,BMP6,BMP7,C3,CBLN1,CCL3,CD34,CDH5,CDKN1C,CHODL,CLDN5,CLSTN2,CTSK,CX3CR1,DCN,DLL4,DTX1,ECSCR,EGR2,EPHA7,FGF10,FGF9,FGFR2,FLRT2,FLRT3,FLT1,FOS,FUT1,GAS6,GPER1,HEY1,HHEX,HLA-DOA,HOXB3,ID4,IGF1,IRF4,ISL1,ITGB8,KDR,KLF2,KLF4,L1CAM,LGI4,LRRC17,LRRN1,MMRN2,MPL,NOS3,NOTCH4,NRARP,NRXN1,NTRK2,OMD,OSR1,OSR2,PI16,PKDCC,PLCB1,PPAR…
GO:BP	regulation of response to stimulus	GO:0048583	FALSE	1.67e-12	11.7761	3998	751	232	21128	ACE,ACKR3,ACTA2,ACTN4,ACVRL1,ADAMTS18,ADCYAP1R1,ADIPOQ,ADRA1B,ADRB2,AFAP1L2,AGTR1,AGTR2,AJUBA,AKAP5,ANGPT1,ANKRD6,APLNR,APOD,ARHGAP28,ARHGEF15,ASPN,ATP6V1C2,BCL6B,BDNF,BMP3,BMP6,BMP7,BTC,C10ORF71,C1QTNF3,C3,C6,C7,CALCRL,CAMK2A,CASP10,CAV2,CBLN1,CCL21,CCL3,CD34,CD55,CD96,CDH2,CDH5,CDKN1C,CFD,CFI,CHRDL1,CIDEA,COCH,CRIM1,CTHRC1,CX3CR1,CXCL14,DACT1,DCN,DGKG,DGKI,DKK2,DLL4,DMPK,DNASE1L3,DPP4,DTX1,DUSP…
GO:BP	regulation of cell population proliferation	GO:0042127	FALSE	2.35e-12	11.6284	1677	751	125	21128	ABI3BP,ACE,ACKR3,ACVR1C,ACVRL1,ADIPOQ,AGTR1,ALDH1A2,ANGPT1,APLNR,APOD,AVPR1A,AZGP1,BCHE,BCL6B,BMP6,BMP7,BTC,CALCRL,CAV2,CBFA2T3,CD248,CD55,CDH2,CDH5,CDKN1C,CLDN5,CNN1,CNN2,CNTFR,CRIP2,CTHRC1,CX3CR1,DACH1,DLL4,DPP4,DPT,EDNRB,EGFL7,ERBB3,ESR1,FABP3,FBLN1,FGF10,FGF9,FGFR2,FLT1,FLT4,FUT1,FZD7,GAS6,GPAM,GPC3,GPER1,GPLD1,HAND2,HBEGF,HHEX,HLA-DMB,ID4,IGF1,IGF2,IGFBP6,IL12RB2,IL31RA,ISL1,JAG2,JUN,KDR,KLF…
GO:BP	positive regulation of developmental process	GO:0051094	FALSE	2.44e-12	11.6118	1311	751	106	21128	ABI3BP,ACACB,ACE,ACVRL1,ADIPOQ,ADRB2,AGTR1,AGTR2,AMIGO2,ANXA3,APLNR,APOB,ASPA,BDNF,BMP6,BMP7,BRINP3,C3,CBLN1,CD34,CDH5,CHODL,CLDN5,CLSTN2,COBL,CTHRC1,CX3CR1,DCN,EGR2,ERBB3,FGF10,FGF9,FGFR2,FLRT2,FLRT3,FLT1,FNDC5,FOS,FUT1,GAS6,GPAM,GPER1,GPRC5B,GRIP1,ID4,IGF1,IGF2,ISL1,ITGB8,KDR,KLF4,L1CAM,LBH,LMO3,LPL,LRRN1,MIXL1,MMRN2,MPL,MYOCD,NOS3,NRXN1,NTRK2,OLFM1,OSR1,OSR2,PDGFB,PDLIM7,PKDCC,PLA2G2A,PLCB1,PO…
GO:BP	muscle tissue development	GO:0060537	FALSE	2.93e-12	11.5324	408	751	52	21128	ACTC1,ACTN2,ALDH1A2,ASB2,BMP7,CAV2,CSRP1,DLL4,DNER,DSG2,DSP,EGR2,ERBB3,FGF9,FGFR2,FHL2,FOS,FZD7,HEG1,HEY1,HLF,IGF1,IGF2,ISL1,MEGF10,MEOX2,MYOCD,NEBL,NR1D2,NR4A1,OSR1,PGM5,PI16,PKD2,PLN,RARB,RBM24,RXRG,RYR2,SGCD,SGCG,SIX1,SLC8A1,SORBS2,SOX6,SRPK3,TGFB2,TNNT2,TPM1,TTN,WNT5A,XK
GO:BP	negative regulation of biological process	GO:0048519	FALSE	3.55e-12	11.4499	5927	751	310	21128	ABCD2,ABI3BP,ACACB,ACE,ACKR3,ACOT11,ACTC1,ACTN2,ACTN4,ACVR1C,ACVRL1,ADAM22,ADAMTS18,ADAMTS7,ADCYAP1R1,ADIPOQ,ADRB2,AGTR2,AJUBA,ALDH1A1,ALDH1A2,AMIGO2,ANGPT1,ANGPTL7,ANKRD6,APLNR,APOD,ARHGAP28,ARHGEF15,ASPN,ATP1B2,AVPR1A,AZGP1,BACH2,BCHE,BCL6B,BDNF,BMP6,BMP7,BRINP3,BTC,C1QTNF3,C3,CALCRL,CARD10,CASQ2,CAV2,CBFA2T3,CBLN1,CCL21,CCL3,CD34,CD55,CD96,CDH2,CDH5,CDKN1C,CH25H,CHRDL1,CIDEA,CIITA,CLDN5,CLIC2,…
GO:BP	response to growth factor	GO:0070848	FALSE	1.68e-11	10.7738	705	751	70	21128	ACVR1C,ACVRL1,ADAMTS7,AGTR2,ANXA3,ASPN,BDNF,BMP6,BMP7,CAV2,CDH5,CDKN1C,CHRDL1,CIDEA,CLDN5,CLEC3B,CRIM1,CTSK,CX3CR1,DCN,DLL4,FGF10,FGF12,FGF9,FGFR2,FLRT2,FLRT3,FLT1,FLT4,FOS,GAS6,GFRA1,GPC3,GREM2,HAS1,HHEX,HTRA3,HYAL2,IL17RD,ITGB8,JUN,KDR,KLF4,LEFTY2,LTBP1,MMRN2,MXRA5,MYOCD,NR4A1,NRXN1,NTRK2,PDGFB,PPARG,RAMP2,RASL11B,RBPMS2,SEMA6A,SFRP1,SFRP4,SFRP5,SLIT2,SMPD3,SOX6,SPRY3,STMN2,TGFB2,TMEM100,TSPAN1…
GO:BP	enzyme-linked receptor protein signaling pathway	GO:0007167	FALSE	1.92e-11	10.716	982	751	86	21128	ACVR1C,ACVRL1,ADIPOQ,ADRB2,AFAP1L2,AGTR2,ANGPT1,APOD,ASPN,BDNF,BMP3,BMP6,BMP7,BTC,CAV2,CDH5,CDKN1C,CHRDL1,CIDEA,CLDN5,CLEC14A,CRIM1,DCN,EPHA3,EPHA5,EPHA7,EPHB4,ERBB3,FGF10,FGF12,FGF9,FGFR2,FLRT2,FLRT3,FLT1,FLT4,FOS,GAS6,GFRA1,GPC3,GPER1,GPLD1,GREM2,HBEGF,HHEX,HTRA3,IGF1,IGF2,IGFBP6,IL17RD,IL31RA,ITGB8,JUN,KDR,LEFTY2,LTBP1,MMRN2,MYOC,MYOCD,NGEF,NOV,NRXN1,NTRK2,PDGFB,PLCB1,PPARG,RASL11B,RBPMS2,ROR2…
GO:BP	cellular response to growth factor stimulus	GO:0071363	FALSE	2.06e-11	10.6859	675	751	68	21128	ACVR1C,ACVRL1,ADAMTS7,AGTR2,ASPN,BDNF,BMP6,BMP7,CAV2,CDH5,CDKN1C,CHRDL1,CIDEA,CLDN5,CLEC3B,CRIM1,CTSK,CX3CR1,DCN,DLL4,FGF10,FGF12,FGF9,FGFR2,FLRT2,FLRT3,FLT1,FLT4,FOS,GAS6,GFRA1,GPC3,GREM2,HAS1,HHEX,HTRA3,HYAL2,IL17RD,ITGB8,JUN,KDR,KLF4,LEFTY2,LTBP1,MMRN2,MYOCD,NR4A1,NRXN1,NTRK2,PDGFB,PPARG,RAMP2,RASL11B,RBPMS2,SEMA6A,SFRP1,SFRP4,SFRP5,SLIT2,SMPD3,SOX6,SPRY3,STMN2,TGFB2,TMEM100,TSPAN12,WNT5A,WWOX
GO:BP	regulation of cell differentiation	GO:0045595	FALSE	4.98e-11	10.3028	1567	751	116	21128	ABI3BP,ACE,ACVRL1,ADAMTS7,ADIPOQ,AGTR1,APOB,ASPA,BCL6B,BDNF,BMP6,BMP7,BRINP3,CASZ1,CCL3,CD34,CDH5,CDKN1C,CHODL,CLDN5,CNTN4,CRIM1,CTHRC1,CX3CR1,CXCL14,DLL4,DMPK,DTX1,EDNRB,EGR2,EPHA3,EPHA7,FGF10,FGF9,FGFR2,FNDC5,FOS,FZD7,GAS6,GPER1,GPRC5B,HAND2,HEY1,HLA-DOA,HOXB3,ID4,IGF1,IGF2,IL17RD,IRF4,ISL1,KDR,KLF4,L1CAM,LBH,LMO3,LPL,LRRC17,MEGF10,MIXL1,MPL,MYOCD,NOTCH4,NOV,NR1D2,NRARP,NTRK2,OLFM1,OSR1,PDGFB,P…
GO:BP	positive regulation of signaling	GO:0023056	FALSE	4.99e-11	10.3017	1727	751	124	21128	ACKR3,ACTA2,ACTN4,ACVRL1,ADCY1,ADCYAP1R1,ADIPOQ,ADRA1B,ADRB2,AFAP1L2,AGTR2,AJUBA,AKAP5,ANGPT1,ANKRD6,ATP6V1C2,BDNF,BMP3,BMP6,BMP7,BTC,C10ORF71,C1QTNF3,C3,CAMK2A,CASP10,CAV2,CCL21,CCL3,CDH2,CDH5,CDKN1C,CLSTN2,CX3CR1,DACT1,DCN,DGKI,DKK2,DLL4,DOC2B,ERBB3,FAM107A,FGF10,FGF9,FGFR2,FLT1,FLT4,FRMD7,FZD7,FZD8,GAS6,GPC3,GPER1,GPLD1,GPRC5B,GRIN2A,GUCY1A2,HAND2,HBEGF,HHEX,HYAL2,IGF1,IGF2,IGFBP6,ISL1,JAG2,JU…
GO:BP	epithelium development	GO:0060429	FALSE	5.15e-11	10.2885	1220	751	98	21128	ACTA2,ACVRL1,ADIPOQ,AGTR2,AJUBA,ALDH1A2,ANKRD6,APLNR,ASB2,BMP6,BMP7,C3,CD34,CDH2,CDH23,CDH5,CDKN1C,CLDN5,COBL,COL15A1,CTHRC1,DACT1,DLL4,DSP,EDNRB,EPHA7,ESR1,FGF10,FGFR2,FLRT3,FRAS1,FZD7,GPC3,HAND2,HBEGF,HEG1,HEY1,ID4,IL31RA,JAG2,JUN,KDR,KLF2,KLF4,KLHL3,LBH,LDB2,LGR5,MEOX1,MEOX2,MMRN2,NKD1,NOTCH4,NR5A2,NRARP,OSR1,PCDH15,PDGFB,PECAM1,PGR,PHGDH,PKD2,PLCB1,PODXL,POF1B,POU3F2,PPARG,PPP1R16B,PRICKLE1,P…
GO:BP	positive regulation of cell communication	GO:0010647	FALSE	5.43e-11	10.2652	1729	751	124	21128	ACKR3,ACTA2,ACTN4,ACVRL1,ADCY1,ADCYAP1R1,ADIPOQ,ADRA1B,ADRB2,AFAP1L2,AGTR2,AJUBA,AKAP5,ANGPT1,ANKRD6,ATP6V1C2,BDNF,BMP3,BMP6,BMP7,BTC,C10ORF71,C1QTNF3,C3,CAMK2A,CASP10,CAV2,CCL21,CCL3,CDH2,CDH5,CDKN1C,CLSTN2,CX3CR1,DACT1,DCN,DGKI,DKK2,DLL4,DOC2B,ERBB3,FAM107A,FGF10,FGF9,FGFR2,FLT1,FLT4,FRMD7,FZD7,FZD8,GAS6,GPC3,GPER1,GPLD1,GPRC5B,GRIN2A,GUCY1A2,HAND2,HBEGF,HHEX,HYAL2,IGF1,IGF2,IGFBP6,ISL1,JAG2,JU…
GO:BP	negative regulation of response to stimulus	GO:0048585	FALSE	6.01e-11	10.2211	1611	751	118	21128	ACKR3,ADAMTS18,ADIPOQ,ADRB2,AGTR2,AJUBA,ANKRD6,APLNR,APOD,ASPN,BDNF,BMP7,C1QTNF3,CALCRL,CAV2,CD34,CD55,CD96,CDH2,CDH5,CHRDL1,CIDEA,CRIM1,CTHRC1,CX3CR1,DACT1,DCN,DGKG,DKK2,DLL4,DPP4,DUSP4,EGFL7,ERBB3,ESR1,FBLN1,FGF10,FGF9,FHL2,GAS6,GPC3,GPD1L,GPER1,GREM2,HEG1,HEY1,HHEX,HTRA3,HYAL2,IGF1,IGFBP6,IL17RD,IRF4,ISL1,ITGA6,KIF26A,KLF4,LBH,LMO3,LPL,LTBP1,MASP1,MCTP1,MDFI,MMP28,MMRN1,MMRN2,MRAP2,MYOC,MYOCD,…
GO:BP	neuron development	GO:0048666	FALSE	6.11e-11	10.214	1130	751	93	21128	ADCY1,APOD,ATP1B2,BDNF,BMP7,C3,CAMK2A,CCDC141,CDH2,CDH23,CDKN1C,CHODL,CNTN4,COBL,CTHRC1,DCLK1,DGKG,DSCAML1,EDNRB,EFHD1,EGR2,EPHA3,EPHA5,EPHA7,EPHB4,FGFR2,FLRT2,FLRT3,FRMD7,GABRB1,GFRA1,GPM6A,GRIP1,HAND2,ISL1,ITGA6,JUN,KCNB1,KCNIP2,KLF4,L1CAM,LGI1,LGI4,LHX6,MGARP,MYOC,MYOT,NCAM1,NEGR1,NEXN,NGEF,NOVA2,NR4A2,NRK,NRN1,NRXN1,NTRK2,OLFM1,OPCML,PCDH12,PCDH15,PHGDH,PLP1,POU3F2,PPP1R9A,PTPRQ,RELN,ROBO4,RO…
GO:BP	negative regulation of locomotion	GO:0040013	FALSE	7.16e-11	10.145	341	751	45	21128	ACVR1C,ACVRL1,ADIPOQ,AGTR2,APOD,ATP1B2,CARD10,CCL21,CLDN5,CNN2,CX3CR1,CYGB,DACH1,DCN,DLL4,DPP4,FBLN1,HAS1,HYAL2,KLF4,MCTP1,MEOX2,MMP28,MMRN2,MYOCD,NOV,PLCB1,PODN,PPARG,PTGER4,RGCC,SEMA3A,SEMA3D,SEMA3E,SEMA3G,SEMA5B,SEMA6A,SERPINF1,SFRP1,SLIT2,SRGAP3,THY1,TIE1,TPM1,WNT5A
GO:BP	muscle cell differentiation	GO:0042692	FALSE	7.21e-11	10.1419	383	751	48	21128	ACTC1,ACTN2,ACTN4,APLNR,ASB2,AVPR1A,BDNF,CAV2,CDH2,CSRP1,DMPK,DNER,DYSF,EDNRB,FGF10,FGF9,FGFR2,FHL2,FZD7,GPER1,HEY1,IGF1,IGF2,ISL1,LDB3,MEGF10,MYOCD,NEBL,NOV,PDGFB,PGM5,PI16,RAMP2,RARB,RBM24,RBM38,RBPMS2,SGCD,SIX1,SLC8A1,SORBS2,SOX6,TMEM119,TMOD2,TNNT2,TPM1,TTN,XK
GO:BP	positive regulation of signal transduction	GO:0009967	FALSE	1.23e-10	9.91066	1528	751	113	21128	ACKR3,ACTA2,ACTN4,ACVRL1,ADCYAP1R1,ADIPOQ,ADRA1B,ADRB2,AFAP1L2,AGTR2,AJUBA,AKAP5,ANGPT1,ANKRD6,ATP6V1C2,BDNF,BMP3,BMP6,BMP7,BTC,C10ORF71,C3,CAMK2A,CASP10,CAV2,CCL21,CCL3,CDH2,CDH5,CDKN1C,CX3CR1,DACT1,DCN,DGKI,DKK2,DLL4,ERBB3,FGF10,FGF9,FGFR2,FLT1,FLT4,FRMD7,FZD7,FZD8,GAS6,GPC3,GPER1,GPRC5B,GRIN2A,GUCY1A2,HAND2,HBEGF,HHEX,HYAL2,IGF1,IGF2,IGFBP6,JAG2,JUN,KDR,KLF2,LEFTY2,LGR5,LIMS2,LMO3,LPAR4,LURAP1…
GO:BP	intracellular signal transduction	GO:0035556	FALSE	1.55e-10	9.81091	2667	751	167	21128	ACKR3,ACKR4,ACOT11,ACTA2,ACTN4,ADCY1,ADCY4,ADCYAP1R1,ADIPOQ,ADRA1B,ADRB2,AGTR1,AGTR2,AJUBA,AKAP5,ANGPT1,ANKRD6,APLNR,ARHGAP28,ARHGEF15,ASB2,AVPR1A,BMP3,BMP6,BMP7,C10ORF71,C1QTNF3,CAP2,CARD10,CASP10,CASQ2,CAV2,CCL21,CCL3,CDH2,CLIC2,CRIP1,CX3CR1,DACT1,DCLK1,DCN,DDAH2,DGKG,DGKI,DMPK,DUSP4,EDNRB,EPHA5,EPHA7,ERBB3,ESR1,FBLN1,FGD5,FGF10,FGF12,FGFR2,FHL2,FLT1,FLT4,FOS,FRMD7,FZD7,FZD8,GAS6,GPD1L,GPER1,GP…
GO:BP	morphogenesis of an epithelium	GO:0002009	FALSE	1.59e-10	9.79957	526	751	57	21128	ACVRL1,AGTR2,AJUBA,ALDH1A2,ANKRD6,APLNR,ASB2,BMP7,COBL,CTHRC1,DACT1,DLL4,EPHA7,ESR1,FGF10,FGFR2,FLRT3,FRAS1,FZD7,GPC3,HAND2,HBEGF,ID4,JAG2,KDR,KLF4,KLHL3,LGR5,MMRN2,NKD1,NOTCH4,NRARP,OSR1,PCDH15,PGR,PKD2,PODXL,PRICKLE1,RASIP1,ROR2,RSPO2,RSPO3,RYR2,SEMA3E,SFRP1,SHANK3,SHROOM3,SIX1,SLIT2,SOX10,SOX17,SOX18,TCF15,TGFB2,TIE1,VANGL2,WNT5A
GO:BP	regulation of cellular component organization	GO:0051128	FALSE	1.71e-10	9.76802	2365	751	153	21128	ABCA3,ACE,ACTN2,ACVRL1,ADIPOQ,ADRB2,AGTR1,AGTR2,AJUBA,AMIGO2,ANGPT1,ANGPTL7,APLNR,APOD,ARHGAP28,ARHGEF15,ASAP3,ATP1B2,ATP8A1,AVPR1A,BDNF,BMP6,BMP7,BTC,C1QL3,C3,CAPN6,CAV2,CBLN1,CCL21,CDH2,CDH5,CDH8,CH25H,CHODL,CLDN5,CLSTN2,COBL,COLQ,CRIM1,DACT1,DCN,DGKG,DMPK,DOC2B,DPP4,DSTN,EHD3,EPHA3,EPHA5,EPHA7,ESR1,FAM107A,FHL1,FLRT2,FLRT3,FRMD7,FSCN1,GPC3,GPER1,GPM6A,GRIP1,GSG1L,HBEGF,HYAL2,IGF1,IGF2,IGFBPL1,…
GO:BP	cell junction organization	GO:0034330	FALSE	2.09e-10	9.67974	708	751	68	21128	ACE,ACTN2,ACVRL1,AJUBA,AMIGO2,APLNR,APOD,ARHGEF15,ARVCF,BDNF,BMP6,C1QL3,C3,CBLN1,CDH2,CDH5,CDH8,CHRDL1,CLDN5,CLSTN2,COLQ,CX3CR1,DMPK,DNER,DRP2,DSG2,DSP,EPHA3,EPHA7,FAM107A,FLRT2,FLRT3,FSCN1,GPM6A,HEG1,ITGA6,ITGB4,KDR,L1CAM,LGI2,LIMS2,LRRN1,MPP7,MYOC,MYOT,NEGR1,NGEF,NRXN1,NTRK2,PALM,PCDH17,PECAM1,POF1B,PRKCH,RAMP2,RELN,SEMA3E,SFRP1,SHANK3,SIX1,SLITRK1,SLITRK6,SVEP1,TEK,TGFB2,THSD1,THY1,WNT5A
GO:BP	regulation of localization	GO:0032879	FALSE	2.75e-10	9.56086	2101	751	140	21128	ABCA3,ABCA8,ACACB,ACE,ACTN2,ACTN4,ACVR1C,ADCY1,ADCYAP1R1,ADIPOQ,ADRB2,AGTR1,AKAP5,ANGPT1,APLNR,APOB,APOD,ATP1B2,ATP8A1,AVPR1A,BDNF,BMP6,C1QTNF3,C3,CAMK2A,CARD10,CASQ2,CCL21,CCL3,CDH2,CIDEA,CLIC2,CLIC5,CNN2,DCLK1,DGKI,DMPK,DOC2B,DYSF,EDNRB,EHD3,EPHA3,EPHA5,ERBB3,FABP3,FGF10,FGF12,FHL1,FXYD6,GAS6,GEM,GPC3,GPD1L,GPER1,GPLD1,GRIN2A,GSG1L,HYAL2,ICA1,IFI27,IGF1,IL16,ISL1,ITLN1,KCNA4,KCNA6,KCNB1,KCND2,K…
GO:BP	negative regulation of cell communication	GO:0010648	FALSE	3.18e-10	9.49789	1353	751	103	21128	ACKR3,ACVR1C,ADIPOQ,ADRB2,AGTR2,AJUBA,ANKRD6,APLNR,APOD,ASPN,AVPR1A,BCHE,BDNF,BMP7,C1QTNF3,CAV2,CBLN1,CDH2,CHRDL1,CIDEA,CRIM1,CTHRC1,CX3CR1,DACT1,DCN,DGKG,DGKI,DKK2,DLL4,DUSP4,EGFL7,ERBB3,ESR1,FBLN1,FGF10,FGF9,FHL2,GAS6,GPC3,GPD1L,GPER1,GREM2,GRIA1,GRIK3,HEG1,HEY1,HHEX,HTRA3,HYAL2,IGF1,IGFBP6,IL17RD,IRF4,ISL1,ITGA6,KCNB1,KIF26A,LBH,LMO3,LTBP1,MDFI,MMRN2,MRAP2,MYOC,MYOCD,NKD1,NOS3,NOV,NPY5R,NR4A2,…
GO:BP	second-messenger-mediated signaling	GO:0019932	FALSE	3.68e-10	9.43469	315	751	42	21128	ACKR3,ACKR4,ADCY1,ADCYAP1R1,AGTR1,AGTR2,AKAP5,APLNR,AVPR1A,C10ORF71,CAP2,CASQ2,CCL3,CLIC2,CX3CR1,DDAH2,DMPK,EDNRB,EPHA5,ERBB3,FHL2,GRIN2A,GUCY1A2,IGF1,KDR,MCTP1,NOS3,NR5A2,PEX5L,PLCG2,PLN,PPP1R9A,PTGFR,RASD1,RCAN2,RCAN3,RYR2,SELP,SGCD,SLC24A4,SLC8A1,TMEM100
GO:BP	regulation of system process	GO:0044057	FALSE	4.88e-10	9.31156	572	751	59	21128	ACE,ADIPOQ,ADRA1B,ADRB2,AGTR1,AGTR2,ATP1B2,AVPR1A,BMP6,CALCRL,CASQ2,CBLN1,CCL3,CLIC2,CNN1,CTNNA3,DES,DMPK,DSG2,DSP,EDNRB,EGR2,EHD3,FGF10,FGF12,GAS6,GPD1L,GPER1,GRIN2A,HAND2,HBEGF,IGF1,ISL1,KCNH2,KCNIP2,KCNJ3,KCNMB2,MGLL,MYOCD,NOS3,NOV,NR4A1,NRXN1,PDGFB,PI16,PLN,PPARG,RELN,RYR2,SCN2B,SCN4B,SHANK3,SLC8A1,SOX10,TGFB2,THRB,TMEM100,TNNT2,TPM1
GO:BP	heart process	GO:0003015	FALSE	5.33e-10	9.27307	252	751	37	21128	ACE,ACTC1,ADRA1B,AGTR2,ATP1B2,AVPR1A,CASQ2,CLIC2,CTNNA3,DES,DMPK,DSG2,DSP,EDNRB,EHD3,FGF12,GPD1L,HBEGF,ISL1,KCNH2,KCNIP2,KCNJ3,MAP2K6,NOS3,PLN,RAMP3,RYR2,SCN2B,SCN4B,SGCD,SGCG,SLC8A1,TGFB2,THRB,TNNT2,TPM1,TTN
GO:BP	monoatomic ion transport	GO:0006811	TRUE	6.01e-10	9.22113	1270	751	98	21128	ACE,ACTN2,ACTN4,ADCYAP1R1,ADRB2,AKAP5,ANO5,APLNR,ATP1B2,ATP6V0E2,ATP6V1C2,ATP8A1,CALCRL,CAMK2A,CASQ2,CCL21,CCL3,CDH23,CLIC2,CLIC5,COX1,COX3,CYTB,DMPK,EDNRB,EHD3,FGF12,FHL1,FXYD6,GABRA4,GABRB1,GAS6,GEM,GPD1L,GPER1,GPM6A,GRIA1,GRIA2,GRIK3,GRIN2A,IL16,KCNA4,KCNA6,KCNB1,KCND2,KCNH2,KCNIP2,KCNJ3,KCNK5,KCNMB2,KCNN3,KLHL3,NOS3,OSR1,PDGFB,PEX5L,PIEZO2,PKD2,PLCG2,PLN,PLP1,PM20D1,PON3,RAMP1,RAMP2,RAMP3,REL…
GO:BP	heart contraction	GO:0060047	FALSE	6.65e-10	9.17749	241	751	36	21128	ACE,ACTC1,ADRA1B,AGTR2,ATP1B2,AVPR1A,CASQ2,CLIC2,CTNNA3,DES,DMPK,DSG2,DSP,EDNRB,EHD3,FGF12,GPD1L,HBEGF,ISL1,KCNH2,KCNIP2,KCNJ3,MAP2K6,NOS3,PLN,RYR2,SCN2B,SCN4B,SGCD,SGCG,SLC8A1,TGFB2,THRB,TNNT2,TPM1,TTN
GO:BP	negative regulation of developmental process	GO:0051093	FALSE	7e-10	9.15507	919	751	79	21128	ACVRL1,ADAMTS7,ADIPOQ,ADRB2,ANGPTL7,ARHGEF15,ASPN,BDNF,BMP7,CBLN1,CCL3,CLDN5,CNTN4,CRIM1,CTSK,CXCL14,DCN,DTX1,ECSCR,EDNRB,EPHA7,FGF10,FGF9,FZD7,GAS6,GPER1,HAND2,HEY1,HHEX,ID4,IGF1,IGF2,IL17RD,ISL1,KLF2,KLF4,LBH,LRRC17,MGARP,MIXL1,MYOCD,NGEF,NKD1,NOS3,NOTCH4,NOV,NRARP,OSR1,PDGFB,PI16,PPARG,PRICKLE1,RARB,RBPMS2,RGCC,RSPO2,SEMA3A,SEMA3D,SEMA3E,SEMA3G,SEMA5B,SEMA6A,SERPINF1,SFRP1,SFRP5,SOX10,SOX17,SO…
GO:BP	heart morphogenesis	GO:0003007	FALSE	7.73e-10	9.11178	255	751	37	21128	ACTC1,ACVRL1,ALDH1A2,APLNR,ASB2,BMP7,CCM2L,CLDN5,DLL4,DSP,EPHB4,FGFR2,FHL2,FLRT2,HAND2,HEG1,HEY1,ISL1,JUN,NOS3,NPY1R,NPY5R,OLFM1,PKD2,RYR2,SIX1,SLIT2,SOX17,SOX18,TEK,TGFB2,TMEM100,TNNT2,TPM1,TTN,VANGL2,WNT5A
GO:BP	negative regulation of signaling	GO:0023057	FALSE	7.77e-10	9.10939	1353	751	102	21128	ACKR3,ACVR1C,ADIPOQ,ADRB2,AGTR2,AJUBA,ANKRD6,APLNR,APOD,ASPN,BCHE,BDNF,BMP7,C1QTNF3,CAV2,CBLN1,CDH2,CHRDL1,CIDEA,CRIM1,CTHRC1,CX3CR1,DACT1,DCN,DGKG,DGKI,DKK2,DLL4,DUSP4,EGFL7,ERBB3,ESR1,FBLN1,FGF10,FGF9,FHL2,GAS6,GPC3,GPD1L,GPER1,GREM2,GRIA1,GRIK3,HEG1,HEY1,HHEX,HTRA3,HYAL2,IGF1,IGFBP6,IL17RD,IRF4,ISL1,ITGA6,KCNB1,KIF26A,LBH,LMO3,LTBP1,MDFI,MMRN2,MRAP2,MYOC,MYOCD,NKD1,NOS3,NOV,NPY5R,NR4A2,NRARP,N…
GO:BP	regulation of transport	GO:0051049	FALSE	7.93e-10	9.1007	1754	751	122	21128	ABCA3,ABCA8,ACE,ACTN2,ACTN4,ACVR1C,ADCY1,ADCYAP1R1,ADIPOQ,ADRB2,AGTR1,AKAP5,ANGPT1,APLNR,APOD,ATP1B2,ATP8A1,AVPR1A,BMP6,C1QTNF3,C3,CAMK2A,CASQ2,CCL21,CCL3,CDH2,CLIC2,CLIC5,CNN2,DGKI,DMPK,DOC2B,DYSF,EDNRB,EHD3,EPHA3,EPHA5,ERBB3,FABP3,FGF10,FGF12,FHL1,FXYD6,GAS6,GEM,GPC3,GPD1L,GPER1,GPLD1,GRIN2A,GSG1L,HYAL2,ICA1,IFI27,IGF1,IL16,ISL1,ITLN1,KCNA4,KCNA6,KCNB1,KCND2,KCNH2,KCNIP2,KCNJ3,KCNK5,MAP2K6,MCTP…
GO:BP	negative regulation of multicellular organismal process	GO:0051241	FALSE	7.98e-10	9.09776	1105	751	89	21128	ABCD2,ABI3BP,ACE,ACOT11,ACVR1C,ACVRL1,ADAMTS18,ADAMTS7,ADIPOQ,ADRB2,AGTR2,ALDH1A1,ANGPT1,ANGPTL7,APOD,AVPR1A,BMP7,C1QTNF3,CALCRL,CARD10,CBLN1,CCL3,CD34,CD96,CIDEA,CLDN5,CTSK,CX3CR1,CYGB,DCN,DLL4,DTX1,ECSCR,EPHA7,FBLN1,FZD7,GAS6,GPER1,HHEX,ID4,IGF1,IL17RD,IL31RA,KLF2,KLF4,LRRC17,MAP2K6,MEOX2,MMRN2,MYOCD,NOS3,NOV,NOVA2,NPR3,NRARP,OSR1,PDGFB,PI16,PLN,PPARG,PRICKLE1,PTGER4,RARB,RGCC,RSPO2,SEMA3A,SEMA…
GO:BP	renal system development	GO:0072001	FALSE	8.67e-10	9.06177	323	751	42	21128	ACE,ACTA2,ADAMTS6,ADIPOQ,AGTR1,AGTR2,ALDH1A2,ANGPT1,BMP6,BMP7,CD34,CDKN1C,EDNRB,ENPEP,EPHA7,FGF10,FGFR2,FRAS1,GFRA1,GPC3,HYAL2,KLHL3,LGR5,MYOCD,OSR1,OSR2,PDGFB,PECAM1,PKD2,PODXL,PROM1,RARB,SERPINF1,SFRP1,SIX1,SLIT2,SOX17,TEK,TGFB2,VANGL2,WFS1,WNT5A
GO:BP	regulation of endothelial cell proliferation	GO:0001936	FALSE	1.11e-09	8.95635	139	751	27	21128	ACVRL1,AGTR1,ALDH1A2,APLNR,BMP6,CAV2,DLL4,EGFL7,FGF10,FLT1,FLT4,FUT1,IGF2,JUN,KDR,MMRN2,NR4A1,NRARP,PDGFB,PPARG,PPP1R16B,RGCC,SCG2,TEK,THBS4,TIE1,WNT5A
GO:BP	positive regulation of locomotion	GO:0040017	FALSE	1.62e-09	8.79066	572	751	58	21128	ACKR3,ACTA2,ACTN4,ANGPT1,ANXA3,ATP8A1,BMP7,CCL21,CCL3,CDH5,CX3CR1,CXCL14,EPB41L4B,FAM107A,FBLN1,FGF10,FGF9,FLT1,FLT4,FUT1,GAS6,GPER1,GPLD1,HBEGF,IGF1,IL16,ITGA6,JUN,KDR,MYOC,NOS3,PDGFB,PECAM1,PLCG2,PLP1,PLVAP,PODXL,RELN,ROR2,SCG2,SELP,SEMA3A,SEMA3D,SEMA3E,SEMA3G,SEMA5B,SEMA6A,SLC26A5,SLC8A1,SLIT2,SUCNR1,TEK,TF,TGFB2,THBS4,THY1,WNT5A,XG
GO:BP	embryo development	GO:0009790	FALSE	1.79e-09	8.74601	1140	751	90	21128	ACE,ACVR1C,ACVRL1,ADIPOQ,AFF3,ALDH1A2,ANGPT1,APLNR,APOB,ASB2,BMP7,C6,CDH23,CDKN1C,CHRDL1,COBL,COL12A1,CTHRC1,DACT1,DHX35,DLL4,DSCAML1,DUSP4,EXOC3L2,FGF10,FGF9,FGFR2,FLRT3,FLT1,FRAS1,FZD7,GPC3,GREM2,HAND2,HEG1,HEY1,HOXB3,HOXD8,IGF1,IGF2,ISL1,ITGB4,JAG2,KDR,KLF2,KLF4,MDFI,MEOX1,MEOX2,MFAP5,MIXL1,MYO3A,NKD1,NOS3,NR5A2,NRARP,NXN,OSR1,OSR2,PCDH12,PCDH15,PDGFB,PHGDH,PKD2,PKDCC,PLCB1,PRICKLE1,PTPRQ,RARB…
GO:BP	actin filament-based process	GO:0030029	FALSE	2.06e-09	8.6856	813	751	72	21128	ACTA2,ACTC1,ACTN2,ACTN4,AMOTL2,ARHGAP28,ARHGEF15,ASAP3,ASB2,CCL21,CNN1,CNN2,COBL,CORO6,CSRP1,CTNNA3,DIAPH3,DSG2,DSP,DSTN,EPB41L4B,EPHA3,EPHA5,FAM107A,FGD5,FGF10,FGF12,FRMD7,FSCN1,GPD1L,HMCN1,KANK3,KANK4,KCNH2,KCNJ3,LDB3,MYH10,MYO3A,MYO5B,MYO5C,MYOC,NEBL,NRK,PCDH15,PDLIM7,PGM5,PLN,POF1B,PPP1R9A,PTGER4,RGCC,RHOBTB1,RYR2,SCN2B,SCN4B,SEMA3E,SFRP1,SGCD,SHANK3,SHROOM3,SLIT2,SORBS2,SPTBN1,TEK,TF,THSD7A,…
GO:BP	response to external stimulus	GO:0009605	FALSE	2.1e-09	8.67786	2861	751	172	21128	ABCD2,ACACB,ACE,ACKR3,ACKR4,ACTA2,ACVR1C,ADAMTS18,ADIPOQ,ADRB2,AGTR1,ALDH1A2,ALPL,ANGPT1,ANXA3,APOB,AVPR1A,BCHE,BCL6B,BDNF,BMP6,BMP7,C1QTNF3,C3,C6,C7,CALCRL,CCDC141,CCL15-CCL14,CCL21,CCL3,CD34,CD55,CD96,CDH2,CDH5,CFD,CFI,CH25H,CIITA,CLEC10A,CNN2,CNTN4,COCH,CTSK,CX3CR1,CXCL14,DAPL1,DCLK1,DNASE1L3,DPP4,DSCAML1,ECSCR,EDNRB,EGR2,EPHA3,EPHA5,EPHA7,EPHB4,ESR1,FABP4,FAM107A,FBXL22,FGF10,FGFR2,FLRT2,FLRT…
GO:BP	axon development	GO:0061564	FALSE	2.16e-09	8.66619	496	751	53	21128	ADCY1,APOD,BDNF,BMP7,CCDC141,CDH2,CHODL,CNTN4,COBL,DCLK1,DSCAML1,EGR2,EPHA3,EPHA5,EPHA7,EPHB4,FGFR2,FLRT2,FLRT3,ISL1,JUN,KLF4,L1CAM,LGI1,MGARP,MYOT,NCAM1,NEXN,NOVA2,NR4A2,NRXN1,NTRK2,OLFM1,PLP1,POU3F2,RELN,ROBO4,S100B,SCARF1,SEMA3A,SEMA3D,SEMA3E,SEMA3G,SEMA5B,SEMA6A,SLIT2,SLITRK1,SLITRK6,SPRY3,THY1,TSPAN2,WNT5A,XK
GO:BP	mesenchyme development	GO:0060485	FALSE	2.17e-09	8.66438	304	751	40	21128	ACTA2,ACTC1,ACTG2,ACVRL1,ALDH1A2,APLNR,BMP7,CDH2,EDNRB,EPHA3,ERBB3,FGF10,FGF9,FGFR2,HAND2,HEY1,IGF1,IL17RD,ISL1,MEOX1,NOS3,NOTCH4,OLFM1,OSR1,PKD2,RBM24,RGCC,SEMA3A,SEMA3D,SEMA3E,SEMA3G,SEMA5B,SEMA6A,SFRP1,SIX1,SOX10,TCF15,TGFB2,TMEM100,WNT5A
GO:BP	cell junction assembly	GO:0034329	FALSE	2.29e-09	8.64005	435	751	49	21128	ACE,ACTN2,ACVRL1,AJUBA,AMIGO2,APLNR,APOD,ARVCF,BDNF,CBLN1,CDH2,CDH5,CDH8,CLDN5,CLSTN2,COLQ,DNER,EPHA3,EPHA7,FAM107A,FLRT2,FLRT3,FSCN1,GPM6A,HEG1,ITGA6,ITGB4,KDR,LGI2,LRRN1,MPP7,MYOC,NEGR1,NRXN1,NTRK2,PCDH17,PECAM1,POF1B,PRKCH,RAMP2,SFRP1,SHANK3,SIX1,SLITRK1,SLITRK6,TEK,THSD1,THY1,WNT5A
GO:BP	extracellular matrix organization	GO:0030198	TRUE	3.01e-09	8.52213	321	751	41	21128	ABI3BP,ADAMTS18,ADAMTS6,ADAMTS7,ADAMTSL5,ANGPTL7,CAV2,COL12A1,COL15A1,COL28A1,COL6A6,COLGALT2,COLQ,CTSK,DPP4,DPT,ECM2,FBLN1,FBLN2,FLRT2,FSCN1,GAS6,HAS1,HMCN1,IMPG2,KAZALD1,MATN2,MMP23B,MMP28,OLFML2A,PTPRQ,RAMP2,RGCC,SMPD3,TCF15,TGFB2,TIE1,TLL1,TNXB,VIT,VWA1
GO:BP	cell morphogenesis	GO:0000902	FALSE	3.23e-09	8.49027	965	751	80	21128	ADCY1,BDNF,BMP7,CAP2,CCDC141,CCL3,CDH2,CDH23,CDH5,CDH8,CHODL,CNTN4,COBL,COCH,COL15A1,DCLK1,DSCAML1,EGR2,EPHA3,EPHA5,EPHA7,EPHB4,FGD5,FGFR2,FLRT2,FLRT3,GPM6A,GRIP1,HEG1,ISL1,KDR,KLF2,L1CAM,LGI1,MPL,MYH10,MYOT,NCAM1,NEXN,NGEF,NOTCH4,NOVA2,NR4A2,NRK,NRN1,NRXN1,NTRK2,OLFM1,PALM,PALM3,PALMD,PCDH15,POF1B,POU3F2,PTPRQ,RELN,RHOBTB1,ROBO4,S100B,SEMA3A,SEMA3D,SEMA3E,SEMA3G,SEMA5B,SEMA6A,SHANK3,SHROOM3,SLC2…
GO:BP	extracellular structure organization	GO:0043062	FALSE	3.33e-09	8.47758	322	751	41	21128	ABI3BP,ADAMTS18,ADAMTS6,ADAMTS7,ADAMTSL5,ANGPTL7,CAV2,COL12A1,COL15A1,COL28A1,COL6A6,COLGALT2,COLQ,CTSK,DPP4,DPT,ECM2,FBLN1,FBLN2,FLRT2,FSCN1,GAS6,HAS1,HMCN1,IMPG2,KAZALD1,MATN2,MMP23B,MMP28,OLFML2A,PTPRQ,RAMP2,RGCC,SMPD3,TCF15,TGFB2,TIE1,TLL1,TNXB,VIT,VWA1
GO:BP	sprouting angiogenesis	GO:0002040	FALSE	4.08e-09	8.38923	125	751	25	21128	ACVRL1,AGTR1,ANGPT1,APLNR,CARD10,CLEC14A,DLL4,EPHB4,FLT4,FUT1,GPLD1,KDR,KLF2,KLF4,MEOX2,MMRN2,NR4A1,NRARP,PPP1R16B,RAMP2,RSPO3,SEMA3E,SEMA6A,SLIT2,TEK
GO:BP	external encapsulating structure organization	GO:0045229	FALSE	4.08e-09	8.38908	324	751	41	21128	ABI3BP,ADAMTS18,ADAMTS6,ADAMTS7,ADAMTSL5,ANGPTL7,CAV2,COL12A1,COL15A1,COL28A1,COL6A6,COLGALT2,COLQ,CTSK,DPP4,DPT,ECM2,FBLN1,FBLN2,FLRT2,FSCN1,GAS6,HAS1,HMCN1,IMPG2,KAZALD1,MATN2,MMP23B,MMP28,OLFML2A,PTPRQ,RAMP2,RGCC,SMPD3,TCF15,TGFB2,TIE1,TLL1,TNXB,VIT,VWA1
GO:BP	tissue migration	GO:0090130	FALSE	4.08e-09	8.38887	310	751	40	21128	ACTA2,ACTC1,ACTG2,ACVRL1,AGTR2,ANGPT1,ANXA3,CARD10,CDH5,CLEC14A,DCN,DLL4,DPP4,EPB41L4B,EPHB4,FGF10,FLT4,FUT1,GPLD1,HBEGF,JUN,KDR,KLF4,MEOX2,MMRN2,NOS3,NOV,NR4A1,PDGFB,PLCG2,PLEKHG5,PPARG,RGCC,SCG2,SERPINF1,SLIT2,SOX18,TEK,TGFB2,WNT5A
GO:BP	regulation of membrane potential	GO:0042391	FALSE	4.24e-09	8.37291	427	751	48	21128	ACTN2,ADRB2,ATP1B2,CASQ2,CBLN1,CTNNA3,DCN,DGKI,DMPK,DSG2,DSP,EHD3,FGF12,FHL1,GABRA4,GABRB1,GPD1L,GPER1,GRIA1,GRIK3,GRIN2A,KCNB1,KCND2,KCNH2,KCNIP2,KCNJ3,KCNK5,KCNMB2,KDR,MYOC,NRXN1,NTRK2,PIEZO2,PLN,RELN,RGS7BP,RIMS4,RYR2,SCN2B,SCN3A,SCN4B,SCN7A,SCN9A,SHANK3,SLC1A7,SLC24A4,SLC26A5,SLC8A1
GO:BP	endothelial cell proliferation	GO:0001935	FALSE	4.35e-09	8.36153	158	751	28	21128	ACVRL1,AGTR1,ALDH1A2,APLNR,BMP6,CAV2,CD34,DLL4,EGFL7,FGF10,FLT1,FLT4,FUT1,IGF2,JUN,KDR,MMRN2,NR4A1,NRARP,PDGFB,PPARG,PPP1R16B,RGCC,SCG2,TEK,THBS4,TIE1,WNT5A
GO:BP	kidney development	GO:0001822	FALSE	6.17e-09	8.20937	314	751	40	21128	ACE,ACTA2,ADAMTS6,ADIPOQ,AGTR1,AGTR2,ALDH1A2,ANGPT1,BMP6,BMP7,CD34,CDKN1C,EDNRB,ENPEP,EPHA7,FGF10,FGFR2,FRAS1,GFRA1,GPC3,HYAL2,KLHL3,OSR1,OSR2,PDGFB,PECAM1,PKD2,PODXL,PROM1,RARB,SERPINF1,SFRP1,SIX1,SLIT2,SOX17,TEK,TGFB2,VANGL2,WFS1,WNT5A
GO:BP	response to chemical	GO:0042221	FALSE	6.28e-09	8.20209	4088	751	223	21128	ABCA3,ABCG2,ACACB,ACE,ACKR3,ACKR4,ACTN2,ACTN4,ACVR1C,ADAMTS7,ADCY1,ADCYAP1R1,ADIPOQ,ADRB2,AFF3,AGTR1,AGTR2,AJUBA,ALDH1A1,ALDH1A2,ALPL,ANGPT1,ANXA3,APOB,APOD,ASPN,AVPR1A,AZGP1,BCHE,BDNF,BMP6,BMP7,BRINP3,CALCRL,CAMK2A,CASQ2,CAV2,CCDC141,CCL15-CCL14,CCL21,CCL3,CD34,CD55,CD69,CD96,CH25H,CIDEA,CIITA,CKB,CLDN5,CLEC3B,CLIC2,CNTFR,CNTN4,COX1,CPNE4,CRIP1,CTSK,CX3CR1,CXCL14,CYGB,DAPL1,DNAJB4,DPP4,DSCAML1,D…
GO:BP	cell population proliferation	GO:0008283	FALSE	8.65e-09	8.06321	1985	751	130	21128	ABI3BP,ACE,ACKR3,ACVR1C,ACVRL1,ADIPOQ,AGTR1,ALDH1A2,ANGPT1,APLNR,APOD,AVPR1A,AZGP1,BCHE,BCL6B,BMP6,BMP7,BTC,CALCRL,CAV2,CBFA2T3,CD248,CD34,CD55,CDH2,CDH5,CDKN1C,CLDN5,CNN1,CNN2,CNTFR,CRIP2,CTHRC1,CX3CR1,DACH1,DLL4,DPP4,DPT,EDNRB,EGFL7,ENPEP,ERBB3,ESR1,FABP3,FBLN1,FGF10,FGF9,FGFR2,FLT1,FLT4,FOS,FUT1,FZD7,GAS6,GPAM,GPC3,GPER1,GPLD1,HAND2,HBEGF,HHEX,HLA-DMB,ID4,IGF1,IGF2,IGFBP6,IL12RB2,IL31RA,ISL1,J…
GO:BP	cell-cell adhesion	GO:0098609	FALSE	9.22e-09	8.03525	948	751	78	21128	ADAMTS18,ADIPOQ,AJUBA,AMIGO2,ARVCF,ATP1B2,BMP6,BMP7,CBLN1,CCL21,CD34,CD55,CDH2,CDH23,CDH5,CDH8,CLDN5,CLSTN2,CNTN4,CSRP1,CTNNA3,CX3CR1,DPP4,DSCAML1,DSG2,DSP,DTX1,EMCN,EPHA7,FLRT3,GPAM,HBB,HLA-DMB,HLA-DOA,HMCN1,ICAM2,IGF1,IGF2,ITGA6,KLF4,L1CAM,LIMS2,MEGF10,MMRN1,MPL,MPZ,MPZL2,MYOT,NEGR1,NEXN,NOTCH4,NOV,NRARP,NRXN1,PCDH1,PCDH12,PCDH15,PCDH17,PCDH19,PCDH20,PECAM1,PODXL,PODXL2,RGCC,ROBO4,SCARF2,SELL,S…
GO:BP	cardiac muscle tissue development	GO:0048738	FALSE	9.68e-09	8.01414	224	751	33	21128	ACTC1,ACTN2,ALDH1A2,ASB2,BMP7,DLL4,DSG2,DSP,ERBB3,FGF9,FGFR2,FHL2,FZD7,HEG1,HEY1,IGF1,ISL1,MYOCD,NEBL,PI16,PLN,RARB,RYR2,SGCD,SGCG,SLC8A1,SORBS2,SOX6,TGFB2,TNNT2,TPM1,TTN,WNT5A
GO:BP	muscle system process	GO:0003012	FALSE	1.3e-08	7.88632	425	751	47	21128	ACTA2,ADRA1B,ADRB2,CALCRL,CASQ2,CLIC2,CNN1,CTNNA3,DES,DMPK,DSG2,DSP,EDNRB,EHD3,FGF12,GATM,GPD1L,GPER1,GRIP2,HAND2,IGF1,KCNH2,KCNIP2,KCNJ3,MAP2K6,MYOC,MYOCD,MYOM1,MYOT,NOS3,NR4A1,PI16,PLN,PPARG,RYR2,SCN2B,SCN4B,SCN7A,SCNN1B,SGCD,SLC8A1,SMPX,SORBS2,TMOD2,TNNT2,TPM1,TTN
GO:BP	striated muscle tissue development	GO:0014706	FALSE	1.41e-08	7.85198	240	751	34	21128	ACTC1,ACTN2,ALDH1A2,ASB2,BMP7,DLL4,DSG2,DSP,ERBB3,FGF9,FGFR2,FHL2,FZD7,HEG1,HEY1,IGF1,ISL1,MYOCD,NEBL,PGM5,PI16,PLN,RARB,RYR2,SGCD,SGCG,SLC8A1,SORBS2,SOX6,TGFB2,TNNT2,TPM1,TTN,WNT5A
GO:BP	neuron projection development	GO:0031175	FALSE	1.51e-08	7.82143	976	751	79	21128	ADCY1,APOD,ATP1B2,BDNF,BMP7,CAMK2A,CCDC141,CDH2,CDH23,CHODL,CNTN4,COBL,CTHRC1,DCLK1,DGKG,DSCAML1,EFHD1,EGR2,EPHA3,EPHA5,EPHA7,EPHB4,FGFR2,FLRT2,FLRT3,FRMD7,GFRA1,GPM6A,GRIP1,ISL1,ITGA6,JUN,KLF4,L1CAM,LGI1,MGARP,MYOC,MYOT,NCAM1,NEGR1,NEXN,NGEF,NOVA2,NR4A2,NRK,NRN1,NRXN1,NTRK2,OLFM1,PCDH15,PHGDH,PLP1,POU3F2,PPP1R9A,RELN,ROBO4,ROR2,S100B,SCARF1,SEMA3A,SEMA3D,SEMA3E,SEMA3G,SEMA5B,SEMA6A,SERPINF1,SERP…
GO:BP	epithelial cell proliferation	GO:0050673	FALSE	1.6e-08	7.79464	443	751	48	21128	ACVRL1,AGTR1,ALDH1A2,APLNR,BMP6,CAV2,CD34,CDKN1C,DACH1,DLL4,EDNRB,EGFL7,ESR1,FGF10,FGF9,FGFR2,FLT1,FLT4,FUT1,FZD7,GPC3,IGF1,IGF2,ISL1,JUN,KDR,LGR5,LIMS2,MMRN2,NOV,NR4A1,NRARP,OSR1,OSR2,PDGFB,PGR,PPARG,PPP1R16B,RGCC,SCG2,SERPINF1,SFRP1,SIX1,TEK,TGFB2,THBS4,TIE1,WNT5A
GO:BP	regulation of monoatomic ion transport	GO:0043269	FALSE	1.61e-08	7.79292	588	751	57	21128	ACE,ACTN2,ACTN4,ADCYAP1R1,ADRB2,AKAP5,APLNR,ATP1B2,CAMK2A,CASQ2,CCL3,CLIC2,CLIC5,DMPK,EHD3,FGF12,FHL1,FXYD6,GEM,GPD1L,GPER1,GRIN2A,IL16,KCNA4,KCNA6,KCNB1,KCND2,KCNH2,KCNIP2,KCNJ3,KCNK5,NOS3,OSR1,PDGFB,PKD2,PLCG2,PLN,PLP1,PM20D1,RAMP3,RELN,REM1,RYR2,SCN2B,SCN3A,SCN4B,SCN7A,SCN9A,SHANK3,SLC26A5,SLC8A1,TF,THY1,TRPC6,TSPAN13,WFS1,WNK2
GO:BP	positive regulation of multicellular organismal process	GO:0051240	FALSE	2.13e-08	7.67106	1695	751	115	21128	ABI3BP,ACACB,ACE,ACTA2,ACVRL1,ADIPOQ,ADRA1B,ADRB2,AFAP1L2,AGTR2,ALPL,AMIGO2,ANXA3,APLNR,ASPA,AVPR1A,BDNF,BMP6,BMP7,C1QTNF3,C3,CBLN1,CCL21,CCL3,CD34,CD55,CDH5,CHODL,CLSTN2,CX3CR1,DPP4,EBF2,EDNRB,EGR2,ERBB3,FABP4,FGF10,FGF9,FGFR2,FLRT2,FLRT3,FLT1,FLT4,FOS,FUT1,GAS6,GATM,GPAM,GPER1,GPIHBP1,GPLD1,GPRC5B,HAND2,HEG1,HLA-DMB,HLA-DOA,HYAL2,ID4,IGF1,IGF2,IL12RB2,IL16,IRF4,ISL1,ITGB8,KDR,KLF4,L1CAM,LBH,LPL…
GO:BP	ossification	GO:0001503	FALSE	2.2e-08	7.65685	416	751	46	21128	ADAMTS7,ADRB2,ALPL,ASPN,BMP3,BMP6,BMP7,CCL3,CHRDL1,CLEC3A,CLEC3B,CRIM1,CTHRC1,CTSK,EGR2,FGF9,FGFR2,FHL2,GPC3,GPLD1,HAND2,ID4,IGF1,IGF2,KAZALD1,LRRC17,MAP2K6,MN1,MYOC,OMD,OSR1,OSR2,PDLIM7,PKDCC,PPARG,PTGER4,ROR2,RSPO2,SFRP1,SLC8A1,SMPD3,TGFB2,TMEM119,TPH1,WNT5A,WWOX
GO:BP	cell surface receptor signaling pathway involved in cell-cell signaling	GO:1905114	FALSE	2.21e-08	7.65529	576	751	56	21128	ADRB2,AMOTL2,ANKRD6,ATP6V1C2,C3,CBLN1,CDH2,CPZ,CTHRC1,DACT1,DGKI,DKK2,DMPK,EDNRB,FGF10,FGF9,FGFR2,FZD7,FZD8,GABRA4,GABRB1,GPC3,GPRC5B,GRIN2A,HHEX,IGFBP6,ISL1,KLF4,LGR5,MDFI,MYOC,NKD1,NR4A2,NRARP,NRXN1,NXN,PKD2,PLCG2,PRICKLE1,RELN,ROR2,RSPO2,RSPO3,SFRP1,SFRP4,SFRP5,SHANK3,SLC1A7,SOX10,SOX17,SOX7,TMEM88,VANGL2,WNK2,WNT5A,WWOX
GO:BP	regulation of epithelial cell proliferation	GO:0050678	FALSE	2.71e-08	7.56712	373	751	43	21128	ACVRL1,AGTR1,ALDH1A2,APLNR,BMP6,CAV2,CDKN1C,DLL4,EDNRB,EGFL7,FGF10,FGF9,FGFR2,FLT1,FLT4,FUT1,FZD7,GPC3,IGF1,IGF2,ISL1,JUN,KDR,LIMS2,MMRN2,NR4A1,NRARP,OSR1,OSR2,PDGFB,PGR,PPARG,PPP1R16B,RGCC,SCG2,SERPINF1,SFRP1,SIX1,TEK,TGFB2,THBS4,TIE1,WNT5A
GO:BP	negative regulation of cell migration	GO:0030336	FALSE	3.2e-08	7.4955	288	751	37	21128	ACVR1C,ACVRL1,ADIPOQ,AGTR2,APOD,ATP1B2,CARD10,CCL21,CLDN5,CNN2,CX3CR1,CYGB,DACH1,DCN,DLL4,DPP4,HAS1,HYAL2,KLF4,MCTP1,MEOX2,MMP28,MMRN2,MYOCD,NOV,PLCB1,PODN,PPARG,PTGER4,RGCC,SERPINF1,SFRP1,SLIT2,SRGAP3,THY1,TIE1,TPM1
GO:BP	calcium-mediated signaling	GO:0019722	FALSE	3.63e-08	7.44061	209	751	31	21128	ACKR3,ACKR4,AGTR1,AKAP5,AVPR1A,C10ORF71,CASQ2,CCL3,CLIC2,CX3CR1,DMPK,EDNRB,ERBB3,FHL2,GRIN2A,IGF1,KDR,MCTP1,NR5A2,PLCG2,PLN,PPP1R9A,PTGFR,RCAN2,RCAN3,RYR2,SELP,SGCD,SLC24A4,SLC8A1,TMEM100
GO:BP	negative regulation of cell motility	GO:2000146	FALSE	3.89e-08	7.41019	304	751	38	21128	ACVR1C,ACVRL1,ADIPOQ,AGTR2,APOD,ATP1B2,CARD10,CCL21,CLDN5,CNN2,CX3CR1,CYGB,DACH1,DCN,DLL4,DPP4,FBLN1,HAS1,HYAL2,KLF4,MCTP1,MEOX2,MMP28,MMRN2,MYOCD,NOV,PLCB1,PODN,PPARG,PTGER4,RGCC,SERPINF1,SFRP1,SLIT2,SRGAP3,THY1,TIE1,TPM1
GO:BP	negative regulation of signal transduction	GO:0009968	FALSE	4.45e-08	7.35167	1248	751	92	21128	ACKR3,ADIPOQ,ADRB2,AGTR2,AJUBA,ANKRD6,APLNR,APOD,ASPN,BDNF,BMP7,C1QTNF3,CAV2,CDH2,CHRDL1,CIDEA,CRIM1,CTHRC1,CX3CR1,DACT1,DCN,DGKG,DKK2,DLL4,DUSP4,EGFL7,ERBB3,ESR1,FBLN1,FGF10,FGF9,FHL2,GAS6,GPC3,GPD1L,GPER1,GREM2,HEG1,HEY1,HHEX,HTRA3,HYAL2,IGF1,IGFBP6,IL17RD,IRF4,ISL1,ITGA6,KIF26A,LBH,LMO3,LTBP1,MDFI,MMRN2,MRAP2,MYOC,MYOCD,NKD1,NOS3,NOV,NR4A2,NRARP,NXN,PALM,PALM3,PPARG,PRICKLE1,RASIP1,RASL11B,RBP…
GO:BP	muscle organ development	GO:0007517	FALSE	4.52e-08	7.34505	349	751	41	21128	ACTC1,ASB2,CAV2,CHODL,CNTFR,DES,DLL4,DNER,DSP,EGR2,ERBB3,FGFR2,FHL1,FOS,HBEGF,HEG1,HLF,IGF1,IGF2,ISL1,MEGF10,MEOX2,MKX,MYOCD,NR1D2,NR4A1,RBM24,RXRG,RYR2,SGCD,SGCG,SIX1,SOX6,SRPK3,TCF15,TGFB2,TNNT2,TPM1,TTN,WNT5A,XK
GO:BP	chemotaxis	GO:0006935	FALSE	4.71e-08	7.32655	621	751	58	21128	ACKR3,ACKR4,AGTR1,ANGPT1,BDNF,BMP7,CCDC141,CCL15-CCL14,CCL21,CCL3,CH25H,CNTN4,CX3CR1,CXCL14,DPP4,DSCAML1,ECSCR,EDNRB,EGR2,EPHA3,EPHA5,EPHA7,EPHB4,FGF10,FLRT2,FLRT3,FLT1,GAS6,HBEGF,IL16,ISL1,KDR,L1CAM,LGI1,MMP28,MYOT,NCAM1,NEXN,NOV,NOVA2,NR4A1,NRXN1,PDGFB,PLEKHG5,RELN,ROBO4,SCG2,SEMA3A,SEMA3D,SEMA3E,SEMA3G,SEMA5B,SEMA6A,SLIT2,SUCNR1,TGFB2,THBS4,WNT5A
GO:BP	taxis	GO:0042330	FALSE	5.36e-08	7.27069	623	751	58	21128	ACKR3,ACKR4,AGTR1,ANGPT1,BDNF,BMP7,CCDC141,CCL15-CCL14,CCL21,CCL3,CH25H,CNTN4,CX3CR1,CXCL14,DPP4,DSCAML1,ECSCR,EDNRB,EGR2,EPHA3,EPHA5,EPHA7,EPHB4,FGF10,FLRT2,FLRT3,FLT1,GAS6,HBEGF,IL16,ISL1,KDR,L1CAM,LGI1,MMP28,MYOT,NCAM1,NEXN,NOV,NOVA2,NR4A1,NRXN1,PDGFB,PLEKHG5,RELN,ROBO4,SCG2,SEMA3A,SEMA3D,SEMA3E,SEMA3G,SEMA5B,SEMA6A,SLIT2,SUCNR1,TGFB2,THBS4,WNT5A
GO:BP	monoatomic cation transport	GO:0006812	FALSE	5.55e-08	7.25569	1059	751	82	21128	ACE,ACTN2,ACTN4,ADCYAP1R1,ADRB2,AKAP5,APLNR,ATP1B2,ATP6V0E2,ATP6V1C2,ATP8A1,CALCRL,CAMK2A,CASQ2,CCL21,CCL3,CDH23,CLIC2,COX1,COX3,CYTB,DMPK,EDNRB,EHD3,FGF12,FHL1,GAS6,GEM,GPD1L,GPER1,GPM6A,GRIN2A,IL16,KCNA4,KCNA6,KCNB1,KCND2,KCNH2,KCNIP2,KCNJ3,KCNK5,KCNMB2,KCNN3,KLHL3,NOS3,OSR1,PDGFB,PEX5L,PIEZO2,PKD2,PLCG2,PLN,PLP1,PM20D1,PON3,RAMP1,RAMP2,RAMP3,REM1,RYR2,RYR3,SCARA5,SCN2B,SCN3A,SCN4B,SCN7A,SCN9A,…
GO:BP	positive regulation of cell motility	GO:2000147	FALSE	5.86e-08	7.23182	557	751	54	21128	ACKR3,ACTA2,ACTN4,ANGPT1,ANXA3,ATP8A1,BMP7,CCL21,CCL3,CDH5,CX3CR1,CXCL14,EPB41L4B,FAM107A,FBLN1,FGF10,FGF9,FLT1,FLT4,FUT1,GAS6,GPER1,GPLD1,HBEGF,IGF1,ITGA6,JUN,KDR,MYOC,NOS3,PDGFB,PECAM1,PLCG2,PLP1,PLVAP,PODXL,RELN,ROR2,SELP,SEMA3A,SEMA3D,SEMA3E,SEMA3G,SEMA5B,SEMA6A,SLC26A5,SLC8A1,TEK,TF,TGFB2,THBS4,THY1,WNT5A,XG
GO:BP	epithelial tube morphogenesis	GO:0060562	FALSE	6.35e-08	7.19709	338	751	40	21128	ACVRL1,AGTR2,APLNR,ASB2,BMP7,COBL,CTHRC1,DLL4,EPHA7,ESR1,FGF10,FGFR2,GPC3,HAND2,KDR,KLHL3,LGR5,MMRN2,NOTCH4,NRARP,OSR1,PGR,PKD2,PODXL,PRICKLE1,RASIP1,RSPO2,RYR2,SEMA3E,SFRP1,SHANK3,SHROOM3,SIX1,SLIT2,SOX17,SOX18,TGFB2,TIE1,VANGL2,WNT5A
GO:BP	positive regulation of response to stimulus	GO:0048584	FALSE	7.74e-08	7.11135	2267	751	140	21128	ACE,ACKR3,ACTA2,ACTN4,ACVRL1,ADCYAP1R1,ADIPOQ,ADRA1B,ADRB2,AFAP1L2,AGTR1,AGTR2,AJUBA,AKAP5,ANGPT1,ANKRD6,ATP6V1C2,BDNF,BMP3,BMP6,BMP7,BTC,C10ORF71,C3,C6,C7,CAMK2A,CASP10,CAV2,CCL21,CCL3,CD55,CDH2,CDH5,CDKN1C,CFD,CFI,COCH,CX3CR1,CXCL14,DACT1,DCN,DGKI,DKK2,DLL4,ERBB3,ESR1,FABP4,FGF10,FGF9,FGFR2,FLT1,FLT4,FRMD7,FZD7,FZD8,GAS6,GPC3,GPER1,GPLD1,GPRC5B,GRIN2A,GUCY1A2,HAND2,HBEGF,HHEX,HLA-DMB,HYAL2,IGF1…
GO:BP	metal ion transport	GO:0030001	FALSE	7.92e-08	7.10101	897	751	73	21128	ACE,ACTN2,ACTN4,ADCYAP1R1,ADRB2,AKAP5,APLNR,ATP1B2,CALCRL,CAMK2A,CASQ2,CCL21,CCL3,CDH23,CLIC2,DMPK,EDNRB,EHD3,FGF12,FHL1,GAS6,GEM,GPD1L,GPER1,GPM6A,GRIN2A,IL16,KCNA4,KCNA6,KCNB1,KCND2,KCNH2,KCNIP2,KCNJ3,KCNK5,KCNMB2,KCNN3,KLHL3,NOS3,OSR1,PDGFB,PKD2,PLCG2,PLN,PLP1,PON3,RAMP1,RAMP2,RAMP3,REM1,RYR2,RYR3,SCARA5,SCN2B,SCN3A,SCN4B,SCN7A,SCN9A,SCNN1B,SLC10A4,SLC24A4,SLC5A4,SLC8A1,TF,THY1,TMEM175,TRPC6,T…
GO:BP	positive regulation of cell migration	GO:0030335	FALSE	8.94e-08	7.04844	530	751	52	21128	ACKR3,ACTA2,ACTN4,ANGPT1,ANXA3,ATP8A1,BMP7,CCL21,CCL3,CDH5,CX3CR1,CXCL14,EPB41L4B,FAM107A,FBLN1,FGF10,FGF9,FLT1,FLT4,FUT1,GAS6,GPER1,GPLD1,HBEGF,IGF1,ITGA6,JUN,KDR,MYOC,NOS3,PDGFB,PECAM1,PLCG2,PLP1,PLVAP,PODXL,RELN,ROR2,SELP,SEMA3A,SEMA3D,SEMA3E,SEMA3G,SEMA5B,SEMA6A,SLC8A1,TEK,TGFB2,THBS4,THY1,WNT5A,XG
GO:BP	cell-cell adhesion via plasma-membrane adhesion molecules	GO:0098742	FALSE	9.87e-08	7.00579	285	751	36	21128	ADIPOQ,AJUBA,AMIGO2,ARVCF,CBLN1,CDH2,CDH23,CDH5,CDH8,CLDN5,CLSTN2,CNTN4,DSCAML1,DSG2,FLRT3,HMCN1,KLF4,L1CAM,MPZ,MPZL2,MYOT,NEXN,NRXN1,PCDH1,PCDH12,PCDH15,PCDH17,PCDH19,PCDH20,PECAM1,ROBO4,SCARF2,SELL,SELP,SLITRK1,TGFB2
GO:BP	endothelial cell migration	GO:0043542	FALSE	1.1e-07	6.96037	218	751	31	21128	ACVRL1,AGTR2,ANGPT1,ANXA3,CARD10,CDH5,CLEC14A,DCN,DLL4,DPP4,EPHB4,FLT4,FUT1,GPLD1,KDR,KLF4,MEOX2,MMRN2,NOS3,NOV,NR4A1,PDGFB,PLEKHG5,PPARG,RGCC,SCG2,SERPINF1,SLIT2,SOX18,TEK,WNT5A
GO:BP	epithelial cell migration	GO:0010631	FALSE	1.18e-07	6.92874	301	751	37	21128	ACVRL1,AGTR2,ANGPT1,ANXA3,CARD10,CDH5,CLEC14A,DCN,DLL4,DPP4,EPB41L4B,EPHB4,FGF10,FLT4,FUT1,GPLD1,HBEGF,JUN,KDR,KLF4,MEOX2,MMRN2,NOS3,NOV,NR4A1,PDGFB,PLCG2,PLEKHG5,PPARG,RGCC,SCG2,SERPINF1,SLIT2,SOX18,TEK,TGFB2,WNT5A
GO:BP	regulation of transmembrane transport	GO:0034762	FALSE	1.41e-07	6.85033	587	751	55	21128	ACE,ACTN2,ACTN4,ADCYAP1R1,ADIPOQ,ADRB2,AKAP5,APLNR,ATP1B2,C3,CASQ2,CLIC2,CLIC5,EHD3,FGF12,FHL1,GEM,GPC3,GPD1L,GPER1,GRIN2A,GSG1L,IGF1,ITLN1,KCNA4,KCNA6,KCNB1,KCND2,KCNH2,KCNIP2,KCNJ3,KCNK5,NRXN1,OSR1,PKD2,PLCG2,PLN,PLP1,PM20D1,RAMP3,RELN,REM1,RYR2,SCN2B,SCN3A,SCN4B,SCN7A,SCN9A,SHANK3,SLC26A5,SLC8A1,THY1,TRPC6,TSPAN13,WNK2
GO:BP	epithelium migration	GO:0090132	FALSE	1.57e-07	6.80291	304	751	37	21128	ACVRL1,AGTR2,ANGPT1,ANXA3,CARD10,CDH5,CLEC14A,DCN,DLL4,DPP4,EPB41L4B,EPHB4,FGF10,FLT4,FUT1,GPLD1,HBEGF,JUN,KDR,KLF4,MEOX2,MMRN2,NOS3,NOV,NR4A1,PDGFB,PLCG2,PLEKHG5,PPARG,RGCC,SCG2,SERPINF1,SLIT2,SOX18,TEK,TGFB2,WNT5A
GO:BP	monoatomic ion transmembrane transport	GO:0034220	FALSE	1.83e-07	6.73802	1027	751	79	21128	ACTN2,ACTN4,ADCYAP1R1,ADRB2,AKAP5,ANO5,APLNR,ATP1B2,ATP6V0E2,ATP6V1C2,ATP8A1,CASQ2,CCL21,CCL3,CLIC2,CLIC5,COX1,COX3,CYTB,EDNRB,EHD3,FGF12,FHL1,GABRA4,GABRB1,GAS6,GEM,GPD1L,GPER1,GPM6A,GRIA1,GRIA2,GRIK3,GRIN2A,KCNA4,KCNA6,KCNB1,KCND2,KCNH2,KCNIP2,KCNJ3,KCNK5,KCNMB2,KCNN3,OSR1,PEX5L,PIEZO2,PKD2,PLCG2,PLN,PLP1,PM20D1,RAMP3,RELN,REM1,RYR2,RYR3,SCARA5,SCN2B,SCN3A,SCN4B,SCN7A,SCN9A,SCNN1B,SHANK3,SLC1A7…
GO:BP	regulation of monoatomic ion transmembrane transport	GO:0034765	FALSE	2.36e-07	6.62712	462	751	47	21128	ACTN2,ACTN4,ADCYAP1R1,ADRB2,AKAP5,APLNR,ATP1B2,CASQ2,CLIC2,CLIC5,EHD3,FGF12,FHL1,GEM,GPD1L,GPER1,GRIN2A,KCNA4,KCNA6,KCNB1,KCND2,KCNH2,KCNIP2,KCNJ3,KCNK5,OSR1,PKD2,PLCG2,PLN,PLP1,PM20D1,RAMP3,RELN,REM1,RYR2,SCN2B,SCN3A,SCN4B,SCN7A,SCN9A,SHANK3,SLC26A5,SLC8A1,THY1,TRPC6,TSPAN13,WNK2
GO:BP	striated muscle cell differentiation	GO:0051146	FALSE	2.47e-07	6.6077	280	751	35	21128	ACTC1,ACTN2,ASB2,AVPR1A,BDNF,CAV2,CDH2,CSRP1,DMPK,DNER,FHL2,FZD7,IGF1,IGF2,ISL1,LDB3,MYOCD,NEBL,NOV,PGM5,PI16,RARB,RBM24,RBM38,SGCD,SIX1,SLC8A1,SORBS2,SOX6,TMEM119,TMOD2,TNNT2,TPM1,TTN,XK
GO:BP	MAPK cascade	GO:0000165	FALSE	2.61e-07	6.58382	773	751	65	21128	ACKR3,ACTA2,ADIPOQ,ADRA1B,ADRB2,AJUBA,ANGPT1,ANKRD6,BMP7,CAV2,CCL21,CCL3,CDH2,DACT1,DUSP4,EPHA7,FBLN1,FGF10,FGF12,FGFR2,FLT1,FLT4,FZD7,FZD8,GAS6,GPER1,HAND2,HYAL2,IGF1,IGF2,IGFBP6,IL31RA,JUN,KDR,LBH,LMO3,MAP2K6,MYOC,NPY5R,NRK,NRXN1,NTRK2,PDGFB,PLA2G2A,PLCB1,PLCG2,PLVAP,PPARG,PTGER4,RAMP3,ROR2,SCG2,SEMA3A,SEMA6A,SFRP1,SH2D3C,SHANK3,SPRY3,TEK,TF,TGFB2,TIMP3,TNFRSF19,WNK2,WNT5A
GO:BP	muscle contraction	GO:0006936	FALSE	2.89e-07	6.5393	340	751	39	21128	ACTA2,ADRA1B,ADRB2,CALCRL,CASQ2,CLIC2,CNN1,CTNNA3,DES,DMPK,DSG2,DSP,EDNRB,EHD3,FGF12,GPD1L,GPER1,GRIP2,KCNH2,KCNIP2,KCNJ3,MAP2K6,MYOCD,MYOM1,MYOT,NR4A1,PLN,RYR2,SCN2B,SCN4B,SCN7A,SCNN1B,SGCD,SLC8A1,SMPX,TMOD2,TNNT2,TPM1,TTN
GO:BP	cellular response to chemical stimulus	GO:0070887	FALSE	3.36e-07	6.47344	2697	751	157	21128	ABCG2,ACE,ACKR3,ACKR4,ACTN2,ACTN4,ADAMTS7,ADCY1,ADIPOQ,ADRB2,AGTR1,AGTR2,AJUBA,ALDH1A1,ALDH1A2,ALPL,ANGPT1,APOB,AVPR1A,BCHE,BMP6,BMP7,BRINP3,CALCRL,CAMK2A,CASQ2,CAV2,CCL15-CCL14,CCL21,CCL3,CD34,CD55,CD69,CH25H,CIITA,CKB,CLEC3B,CLIC2,CNTFR,CPNE4,CRIP1,CTSK,CX3CR1,CXCL14,CYGB,DPP4,DTX1,EDNRB,EFHD1,EGR2,EPHA3,EPHA5,ESR1,FABP4,FAM107A,FGFR2,FLT1,FOS,FZD7,GABRB1,GAS6,GBP4,GPD1,GPER1,GPLD1,GREM2,GRIA1,…
GO:BP	embryonic morphogenesis	GO:0048598	FALSE	3.38e-07	6.47077	618	751	56	21128	ADIPOQ,AFF3,ALDH1A2,APLNR,ASB2,BMP7,CDH23,CDKN1C,COBL,COL12A1,CTHRC1,DACT1,DLL4,DSCAML1,DUSP4,FGF10,FGF9,FGFR2,FLRT3,FLT1,FRAS1,FZD7,GPC3,GREM2,HAND2,HOXB3,IGF2,ITGB4,JAG2,KLF4,MDFI,MFAP5,MIXL1,MYO3A,OSR1,OSR2,PCDH15,PKD2,PRICKLE1,PTPRQ,RARB,RBPMS2,RSPO2,RSPO3,RYR2,SFRP1,SHANK3,SHROOM3,SIX1,SLITRK6,SOX17,SOX18,SOX7,TGFB2,VANGL2,WNT5A
GO:BP	regulation of phosphate metabolic process	GO:0019220	FALSE	3.73e-07	6.42809	1400	751	97	21128	ABCA3,ACE,ACVRL1,ADCYAP1R1,ADIPOQ,ADRB2,AFAP1L2,AGTR2,AJUBA,ANGPT1,APLNR,BDNF,BMP3,BMP6,BMP7,BTC,C3,CARD10,CBFA2T3,CCL21,CDH5,CDKN1C,CX3CR1,DBNDD1,EDNRB,EPHA3,EPHA5,EPHA7,EPHB4,ERBB3,FABP3,FABP4,FBLN1,FGF10,FGF9,FGFR2,FLT1,FLT4,FZD7,FZD8,GAS6,GFRA1,GPD1,GPD1L,GPER1,GPLD1,GPRC5B,HBEGF,HEG1,HHEX,HYAL2,IGF1,IGF2,IL31RA,ISL1,ITGA6,ITLN1,JUN,KDR,LDB2,LEFTY2,MAP2K6,MYOCD,NOS3,NRXN1,NTRK2,NUAK1,PDGFB,PE…
GO:BP	regulation of phosphorus metabolic process	GO:0051174	FALSE	3.88e-07	6.41128	1401	751	97	21128	ABCA3,ACE,ACVRL1,ADCYAP1R1,ADIPOQ,ADRB2,AFAP1L2,AGTR2,AJUBA,ANGPT1,APLNR,BDNF,BMP3,BMP6,BMP7,BTC,C3,CARD10,CBFA2T3,CCL21,CDH5,CDKN1C,CX3CR1,DBNDD1,EDNRB,EPHA3,EPHA5,EPHA7,EPHB4,ERBB3,FABP3,FABP4,FBLN1,FGF10,FGF9,FGFR2,FLT1,FLT4,FZD7,FZD8,GAS6,GFRA1,GPD1,GPD1L,GPER1,GPLD1,GPRC5B,HBEGF,HEG1,HHEX,HYAL2,IGF1,IGF2,IL31RA,ISL1,ITGA6,ITLN1,JUN,KDR,LDB2,LEFTY2,MAP2K6,MYOCD,NOS3,NRXN1,NTRK2,NUAK1,PDGFB,PE…
GO:BP	behavior	GO:0007610	FALSE	4.47e-07	6.34974	640	751	57	21128	ACE,ADAM22,ADCY1,AGTR2,ATP1B2,ATP8A1,AVPR1A,BCHE,BDNF,C3ORF70,CCL3,CDH23,CHST10,CLDN5,CNTFR,CX3CR1,DACH1,DGKI,DPP4,EDNRB,EGR2,FGF12,FOS,GATM,GRIA1,GRIN2A,HAND2,KCND2,LGI4,MRAP2,NEGR1,NPY1R,NPY5R,NR1D2,NR4A2,NRXN1,NTRK2,PCDH15,PCDH17,PER3,PLCB1,PPP1R1B,PRKAR2B,RELN,S100B,SCN9A,SERPINF1,SHANK3,SLC24A4,SLC2A4,SLITRK1,SLITRK6,THBS4,THRB,TMOD2,VWA1,WFS1
GO:BP	regulation of phosphorylation	GO:0042325	FALSE	4.64e-07	6.33328	1244	751	89	21128	ACE,ACVRL1,ADIPOQ,ADRB2,AFAP1L2,AJUBA,ANGPT1,APLNR,BDNF,BMP3,BMP6,BMP7,BTC,C3,CARD10,CBFA2T3,CCL21,CDH5,CDKN1C,CX3CR1,DBNDD1,EDNRB,EPHA3,EPHA5,EPHA7,EPHB4,ERBB3,FABP4,FBLN1,FGF10,FGF9,FGFR2,FLT1,FLT4,FZD7,FZD8,GAS6,GFRA1,GPD1,GPD1L,GPER1,GPRC5B,HBEGF,HEG1,HHEX,HYAL2,IGF1,IGF2,IL31RA,ISL1,ITGA6,ITLN1,JUN,KDR,LDB2,LEFTY2,MAP2K6,MYOCD,NRXN1,NTRK2,PDGFB,PECAM1,PKD2,PLCG2,PPARG,PPP1R1B,PRKAR2B,PTPRB,R…
GO:BP	regulation of heart contraction	GO:0008016	FALSE	5.24e-07	6.28058	205	751	29	21128	ADRA1B,AGTR2,ATP1B2,AVPR1A,CASQ2,CLIC2,CTNNA3,DES,DMPK,DSG2,DSP,EDNRB,EHD3,GPD1L,HBEGF,ISL1,KCNH2,KCNIP2,KCNJ3,NOS3,PLN,RYR2,SCN2B,SCN4B,SLC8A1,TGFB2,THRB,TNNT2,TPM1
GO:BP	cardiocyte differentiation	GO:0035051	FALSE	5.37e-07	6.26968	143	751	24	21128	ABI3BP,ACTC1,ACTN2,ASB2,BMP7,FHL2,FZD7,GPER1,HAND2,IGF1,ISL1,MYOCD,NEBL,PI16,PRICKLE1,RARB,SGCD,SLC8A1,SORBS2,SOX17,SOX18,SOX6,TGFB2,TTN
GO:BP	regulation of cell junction assembly	GO:1901888	FALSE	5.9e-07	6.2293	206	751	29	21128	ACE,ACVRL1,AMIGO2,APLNR,APOD,BDNF,CBLN1,CLDN5,CLSTN2,COLQ,EPHA3,EPHA7,FAM107A,FLRT2,FLRT3,KDR,LRRN1,MYOC,NEGR1,NRXN1,NTRK2,PRKCH,SFRP1,SIX1,SLITRK1,SLITRK6,TEK,THY1,WNT5A
GO:BP	homeostatic process	GO:0042592	FALSE	6.96e-07	6.15726	1666	751	109	21128	ABCA3,ACACB,ACE,ACOT11,ADIPOQ,ADRB2,AGTR1,ALDH1A1,ALPL,ANGPT1,APLNR,APOB,ATP1B2,ATP6V0E2,AVPR1A,AZGP1,BMP6,C1QTNF3,CASQ2,CAV2,CCL21,CCL3,CD34,CDH2,CDH23,CDH5,CIDEA,CKB,CLDN5,CLIC2,CRISPLD1,CTSK,CX3CR1,CYTL1,DMPK,EBF2,EDNRB,EMCN,EPHA5,FABP3,FABP4,GAS6,GATM,GPAM,GPER1,GPIHBP1,GPLD1,GRIA1,HYAL2,IL31RA,IRF4,KCNB1,KCNH2,KDR,KLF2,KLHL3,LCAT,LDB2,LPL,MAP2K6,MPL,MRAP2,MTTP,MYCT1,MYO5B,NELL2,NOS3,NOV,NOVA…
GO:BP	axonogenesis	GO:0007409	FALSE	8.36e-07	6.07789	447	751	45	21128	ADCY1,BDNF,BMP7,CCDC141,CDH2,CHODL,CNTN4,COBL,DCLK1,DSCAML1,EGR2,EPHA3,EPHA5,EPHA7,EPHB4,FGFR2,FLRT2,FLRT3,ISL1,L1CAM,LGI1,MYOT,NCAM1,NEXN,NOVA2,NR4A2,NRXN1,NTRK2,OLFM1,POU3F2,RELN,ROBO4,S100B,SEMA3A,SEMA3D,SEMA3E,SEMA3G,SEMA5B,SEMA6A,SLIT2,SLITRK1,SLITRK6,THY1,WNT5A,XK
GO:BP	positive regulation of phosphate metabolic process	GO:0045937	FALSE	8.39e-07	6.07602	907	751	71	21128	ACE,ACVRL1,ADCYAP1R1,ADIPOQ,ADRB2,AFAP1L2,AGTR2,AJUBA,ANGPT1,APLNR,BDNF,BMP3,BMP6,BMP7,BTC,C3,CARD10,CCL21,CDH5,CX3CR1,EDNRB,EPHA3,EPHA5,EPHA7,EPHB4,ERBB3,FABP3,FGF10,FGF9,FGFR2,FLT1,FLT4,FZD7,FZD8,GAS6,GFRA1,GPD1,GPER1,GPLD1,GPRC5B,HBEGF,IGF1,IGF2,IL31RA,ISL1,ITGA6,ITLN1,KDR,LEFTY2,MAP2K6,NOS3,NRXN1,NTRK2,PDGFB,PECAM1,PKD2,PLCG2,PPARG,PPP1R16B,RAMP3,RELN,RGCC,ROR2,SH2D3C,TEK,TF,TGFB2,THBS4,TIE1,…
GO:BP	positive regulation of phosphorus metabolic process	GO:0010562	FALSE	8.39e-07	6.07602	907	751	71	21128	ACE,ACVRL1,ADCYAP1R1,ADIPOQ,ADRB2,AFAP1L2,AGTR2,AJUBA,ANGPT1,APLNR,BDNF,BMP3,BMP6,BMP7,BTC,C3,CARD10,CCL21,CDH5,CX3CR1,EDNRB,EPHA3,EPHA5,EPHA7,EPHB4,ERBB3,FABP3,FGF10,FGF9,FGFR2,FLT1,FLT4,FZD7,FZD8,GAS6,GFRA1,GPD1,GPER1,GPLD1,GPRC5B,HBEGF,IGF1,IGF2,IL31RA,ISL1,ITGA6,ITLN1,KDR,LEFTY2,MAP2K6,NOS3,NRXN1,NTRK2,PDGFB,PECAM1,PKD2,PLCG2,PPARG,PPP1R16B,RAMP3,RELN,RGCC,ROR2,SH2D3C,TEK,TF,TGFB2,THBS4,TIE1,…
GO:BP	cellular component morphogenesis	GO:0032989	FALSE	9e-07	6.04588	778	751	64	21128	ACTC1,ACTN2,ADCY1,BDNF,BMP7,CCDC141,CDH2,CHODL,CNTN4,COBL,CSRP1,DCLK1,DSCAML1,EGR2,EPHA3,EPHA5,EPHA7,EPHB4,FGFR2,FLRT2,FLRT3,GPM6A,GRIP1,ISL1,ITGB4,L1CAM,LDB3,LGI1,MYOT,NCAM1,NEBL,NEXN,NGEF,NOVA2,NR4A2,NRK,NRN1,NRXN1,NTRK2,OLFM1,PGM5,POU3F2,RELN,ROBO4,S100B,SEMA3A,SEMA3D,SEMA3E,SEMA3G,SEMA5B,SEMA6A,SHANK3,SLIT2,SLITRK1,SLITRK6,SPRY3,SYT17,THY1,TMOD2,TNNT2,TPM1,TTN,WNT5A,XK
GO:BP	regulation of molecular function	GO:0065009	FALSE	9.63e-07	6.01653	3059	751	171	21128	ACACB,ACE,ACTN2,ACTN4,ACVR1C,ADCY1,ADCYAP1R1,ADIPOQ,ADRB2,AFAP1L2,AGTR1,AGTR2,AJUBA,AKAP5,ALDH1A1,ANGPT1,ANXA3,ARHGAP28,ARHGEF15,ASAP3,ATP1B2,AVPR1A,BDNF,BMP7,BTC,C3,CAMK2A,CAP2,CARD10,CASP10,CASQ2,CAV2,CCL21,CCL3,CDKN1C,CLDN5,CLIC2,COL28A1,CRIM1,CTHRC1,CX3CR1,CYTL1,DACT1,DBNDD1,DDAH2,DENND2A,DGKI,DKK2,DMPK,DPM3,EBF2,EDNRB,EHD3,EPHA3,EPHA5,EPHA7,EPHB4,ERBB3,ESR1,FABP4,FBLN1,FGD5,FGF10,FGF12,FGFR2…
GO:BP	regulation of blood circulation	GO:1903522	FALSE	1.04317e-06	5.98164	252	751	32	21128	ACE,ADRA1B,AGTR1,AGTR2,ATP1B2,AVPR1A,CASQ2,CLIC2,CTNNA3,DES,DMPK,DSG2,DSP,EDNRB,EHD3,GPD1L,HBEGF,ISL1,KCNH2,KCNIP2,KCNJ3,KCNMB2,NOS3,PLN,RYR2,SCN2B,SCN4B,SLC8A1,TGFB2,THRB,TNNT2,TPM1
GO:BP	cell morphogenesis involved in differentiation	GO:0000904	FALSE	1.98727e-06	5.70174	648	751	56	21128	ADCY1,BDNF,BMP7,CCDC141,CDH2,CDH23,CHODL,CNTN4,COBL,COL15A1,DCLK1,DSCAML1,EGR2,EPHA3,EPHA5,EPHA7,EPHB4,FGFR2,FLRT2,FLRT3,HEG1,ISL1,L1CAM,LGI1,MPL,MYOT,NCAM1,NEXN,NGEF,NOTCH4,NOVA2,NR4A2,NRXN1,NTRK2,OLFM1,PCDH15,POF1B,POU3F2,PTPRQ,RELN,ROBO4,S100B,SEMA3A,SEMA3D,SEMA3E,SEMA3G,SEMA5B,SEMA6A,SHANK3,SLIT2,SLITRK1,SLITRK6,SOX17,THY1,WNT5A,XK
GO:BP	peptidyl-tyrosine phosphorylation	GO:0018108	FALSE	2.04052e-06	5.69026	379	751	40	21128	ACE,ADIPOQ,AFAP1L2,ANGPT1,BMP6,BTC,EPHA3,EPHA5,EPHA7,EPHB4,ERBB3,FGF10,FGFR2,FLT1,FLT4,GAS6,GFRA1,GPRC5B,HBEGF,HYAL2,IGF1,IGF2,IL12RB2,IL31RA,ISL1,KDR,MAP2K6,NTRK2,PDGFB,PECAM1,PKDCC,PLCG2,RELN,ROR2,SFRP1,TEK,THBS4,THY1,TIE1,TTN
GO:BP	peptidyl-tyrosine modification	GO:0018212	FALSE	2.38221e-06	5.62302	381	751	40	21128	ACE,ADIPOQ,AFAP1L2,ANGPT1,BMP6,BTC,EPHA3,EPHA5,EPHA7,EPHB4,ERBB3,FGF10,FGFR2,FLT1,FLT4,GAS6,GFRA1,GPRC5B,HBEGF,HYAL2,IGF1,IGF2,IL12RB2,IL31RA,ISL1,KDR,MAP2K6,NTRK2,PDGFB,PECAM1,PKDCC,PLCG2,RELN,ROR2,SFRP1,TEK,THBS4,THY1,TIE1,TTN
GO:BP	transmembrane transport	GO:0055085	FALSE	2.46648e-06	5.60792	1555	751	102	21128	ABCA10,ABCA3,ABCA6,ABCA8,ABCA9,ABCD2,ABCG2,ACE,ACTN2,ACTN4,ADCYAP1R1,ADIPOQ,ADRB2,AKAP5,ANO5,APLNR,AQP7,ATP1B2,ATP6V0E2,ATP6V1C2,ATP8A1,AZGP1,C3,CASQ2,CCL21,CCL3,CLIC2,CLIC5,COX1,COX3,CYTB,EDNRB,EHD3,FGF12,FHL1,GABRA4,GABRB1,GAS6,GEM,GPC3,GPD1L,GPER1,GPM6A,GRIA1,GRIA2,GRIK3,GRIN2A,GSG1L,IGF1,ITLN1,KCNA4,KCNA6,KCNB1,KCND2,KCNH2,KCNIP2,KCNJ3,KCNK5,KCNMB2,KCNN3,MPC1,NRXN1,OSR1,PEX5L,PIEZO2,PKD2,PLCG…
GO:BP	positive regulation of endothelial cell proliferation	GO:0001938	FALSE	2.73282e-06	5.56339	97	751	19	21128	ACVRL1,AGTR1,APLNR,BMP6,CAV2,EGFL7,FGF10,FLT4,IGF2,JUN,KDR,NR4A1,NRARP,PDGFB,PPP1R16B,SCG2,TEK,THBS4,WNT5A
GO:BP	regulation of vasculature development	GO:1901342	FALSE	2.76907e-06	5.55767	291	751	34	21128	ACVRL1,ANGPTL7,ANXA3,APLNR,C3,CD34,CDH5,CLDN5,CX3CR1,DCN,ECSCR,FLT1,FUT1,HHEX,ISL1,ITGB8,KDR,KLF2,KLF4,NOS3,PPARG,PPP1R16B,RAMP2,RGCC,SEMA3E,SEMA6A,SERPINF1,SFRP1,TEK,TGFB2,THBS4,TIE1,TSPAN12,WNT5A
GO:BP	growth	GO:0040007	FALSE	2.83957e-06	5.54675	933	751	71	21128	ACACB,ACVR1C,ACVRL1,ADRB2,AGTR1,AGTR2,APOD,AVPR1A,BDNF,CDKN1C,COBL,COLQ,CRIM1,DCLK1,EPHA7,ESR1,FAM107A,FGF10,FGF9,FGFR2,FHL1,FLRT3,FZD7,GPAM,GPC3,HBEGF,HEG1,HYAL2,IGF1,IGF2,IGFBPL1,KAZALD1,KIF26A,KLF2,L1CAM,LGI1,MYOCD,N6AMT1,NKD1,NOV,NPY1R,NRN1,OLFM1,PCDH15,PI16,PKDCC,PLCB1,POU3F2,PPARG,RARB,RSPO2,SCNN1B,SEMA3A,SEMA3D,SEMA3E,SEMA3G,SEMA5B,SEMA6A,SFRP1,SIX1,SLIT2,SLITRK1,SLITRK6,SMPD3,SORBS2,SOX10…
GO:BP	Wnt signaling pathway	GO:0016055	FALSE	2.85958e-06	5.5437	448	751	44	21128	AMOTL2,ANKRD6,ATP6V1C2,CDH2,CPZ,CTHRC1,DACT1,DKK2,EDNRB,FGF10,FGF9,FGFR2,FZD7,FZD8,GPC3,GPRC5B,HHEX,IGFBP6,ISL1,KLF4,LGR5,MDFI,MYOC,NKD1,NR4A2,NRARP,NXN,PKD2,PLCG2,PRICKLE1,ROR2,RSPO2,RSPO3,SFRP1,SFRP4,SFRP5,SOX10,SOX17,SOX7,TMEM88,VANGL2,WNK2,WNT5A,WWOX
GO:BP	stem cell differentiation	GO:0048863	FALSE	2.88452e-06	5.53993	248	751	31	21128	ACE,ALDH1A2,BMP7,CDH2,EDNRB,ESR1,FGFR2,GPM6A,HAND2,ISL1,LBH,MEOX1,MYOCD,OSR1,PRICKLE1,RBM24,SEMA3A,SEMA3D,SEMA3E,SEMA3G,SEMA5B,SEMA6A,SFRP1,SHC4,SIX1,SOX10,SOX17,SOX18,SOX6,TCF15,TGFB2
GO:BP	actin cytoskeleton organization	GO:0030036	FALSE	2.8881e-06	5.53939	727	751	60	21128	ACTC1,ACTN2,ACTN4,AMOTL2,ARHGAP28,ARHGEF15,ASAP3,ASB2,CCL21,CNN1,CNN2,COBL,CORO6,CSRP1,CTNNA3,DIAPH3,DSTN,EPB41L4B,EPHA3,EPHA5,FAM107A,FGD5,FGF10,FRMD7,FSCN1,HMCN1,KANK3,KANK4,LDB3,MYH10,MYO3A,MYO5B,MYO5C,MYOC,NEBL,NRK,PCDH15,PDLIM7,PGM5,POF1B,PPP1R9A,PTGER4,RGCC,RHOBTB1,SEMA3E,SFRP1,SHANK3,SHROOM3,SLIT2,SORBS2,SPTBN1,TEK,TF,THSD7A,THSD7B,TMOD2,TNNT2,TNXB,TPM1,TTN
GO:BP	regulation of MAPK cascade	GO:0043408	FALSE	2.95474e-06	5.52948	673	751	57	21128	ACKR3,ACTA2,ADIPOQ,ADRA1B,ADRB2,AJUBA,ANGPT1,ANKRD6,BMP7,CAV2,CCL21,CCL3,CDH2,DACT1,DUSP4,EPHA7,FBLN1,FGF10,FGFR2,FLT1,FLT4,FZD7,FZD8,GAS6,GPER1,HAND2,HYAL2,IGF1,IGF2,IGFBP6,JUN,KDR,LBH,LMO3,MAP2K6,MYOC,NPY5R,NRK,NRXN1,NTRK2,PDGFB,PLA2G2A,PLCB1,PLCG2,PPARG,RAMP3,ROR2,SEMA3A,SEMA6A,SFRP1,SPRY3,TEK,TGFB2,TIMP3,TNFRSF19,WNK2,WNT5A
GO:BP	cell-cell signaling by wnt	GO:0198738	FALSE	3.28516e-06	5.48344	450	751	44	21128	AMOTL2,ANKRD6,ATP6V1C2,CDH2,CPZ,CTHRC1,DACT1,DKK2,EDNRB,FGF10,FGF9,FGFR2,FZD7,FZD8,GPC3,GPRC5B,HHEX,IGFBP6,ISL1,KLF4,LGR5,MDFI,MYOC,NKD1,NR4A2,NRARP,NXN,PKD2,PLCG2,PRICKLE1,ROR2,RSPO2,RSPO3,SFRP1,SFRP4,SFRP5,SOX10,SOX17,SOX7,TMEM88,VANGL2,WNK2,WNT5A,WWOX
GO:BP	regulation of metal ion transport	GO:0010959	FALSE	4.04417e-06	5.39317	404	751	41	21128	ACE,ACTN2,ACTN4,ADCYAP1R1,ADRB2,AKAP5,APLNR,ATP1B2,CAMK2A,CASQ2,CCL3,CLIC2,DMPK,EHD3,FGF12,FHL1,GEM,GPD1L,GPER1,IL16,KCNH2,KCNIP2,NOS3,OSR1,PDGFB,PKD2,PLCG2,PLN,PLP1,RAMP3,REM1,RYR2,SCN2B,SCN4B,SLC8A1,TF,THY1,TRPC6,TSPAN13,WFS1,WNK2
GO:BP	transmembrane receptor protein tyrosine kinase signaling pathway	GO:0007169	FALSE	4.28894e-06	5.36765	626	751	54	21128	ADIPOQ,ADRB2,AFAP1L2,AGTR2,ANGPT1,APOD,BDNF,BTC,CAV2,CLEC14A,CRIM1,DCN,EPHA3,EPHA5,EPHA7,EPHB4,ERBB3,FGF10,FGF12,FGF9,FGFR2,FLRT2,FLRT3,FLT1,FLT4,GFRA1,GPER1,GPLD1,HBEGF,HHEX,IGF1,IGF2,IGFBP6,IL31RA,KDR,MMRN2,MYOC,MYOCD,NGEF,NRXN1,NTRK2,PDGFB,PLCB1,ROR2,SEMA6A,SHC4,SLC2A4,SMPD3,SPRY3,SVEP1,TEK,TIE1,TSPAN12,WNT5A
GO:BP	transmembrane receptor protein serine/threonine kinase signaling pathway	GO:0007178	FALSE	5.05692e-06	5.29611	375	751	39	21128	ACVR1C,ACVRL1,ASPN,BMP3,BMP6,BMP7,CAV2,CDH5,CDKN1C,CHRDL1,CIDEA,CLDN5,CRIM1,FGF10,FGF9,FOS,GPC3,GREM2,HTRA3,IL17RD,ITGB8,JUN,KDR,LEFTY2,LTBP1,MYOCD,NOV,PPARG,RASL11B,RBPMS2,SFRP1,SFRP4,SFRP5,SMPD3,SPTBN1,TF,TGFB2,TMEM100,WNT5A
GO:BP	axon guidance	GO:0007411	FALSE	5.32963e-06	5.2733	240	751	30	21128	BDNF,BMP7,CCDC141,CNTN4,DSCAML1,EGR2,EPHA3,EPHA5,EPHA7,EPHB4,FLRT2,FLRT3,ISL1,L1CAM,LGI1,MYOT,NCAM1,NEXN,NOVA2,NRXN1,RELN,ROBO4,SEMA3A,SEMA3D,SEMA3E,SEMA3G,SEMA5B,SEMA6A,SLIT2,WNT5A
GO:BP	response to organic substance	GO:0010033	FALSE	5.47165e-06	5.26188	2664	751	151	21128	ABCA3,ACACB,ACE,ACKR3,ACKR4,ACTN2,ACTN4,ACVR1C,ADAMTS7,ADCY1,ADCYAP1R1,ADIPOQ,ADRB2,AFF3,AGTR1,AGTR2,ALDH1A1,ALDH1A2,ALPL,ANGPT1,ANXA3,APOB,AVPR1A,BCHE,BMP6,BMP7,BRINP3,CALCRL,CAMK2A,CASQ2,CAV2,CCL21,CCL3,CD55,CD96,CH25H,CIDEA,CIITA,CKB,CLDN5,CLEC3B,CNTFR,CRIP1,CTSK,CX3CR1,DNAJB4,DTX1,EDNRB,EGR2,EPHA3,EPHA5,ESR1,FABP4,FAM107A,FGF10,FGFR2,FHL2,FOS,FZD7,GABRB1,GAS6,GBP4,GPAM,GPD1,GPER1,GPIHBP1,GPLD…
GO:BP	muscle cell development	GO:0055001	FALSE	5.79146e-06	5.23721	186	751	26	21128	ACTC1,ACTN2,ACTN4,ASB2,CAV2,CSRP1,DNER,DYSF,FHL2,IGF1,ISL1,LDB3,MEGF10,NEBL,PGM5,PI16,RAMP2,SGCD,SIX1,SLC8A1,SORBS2,TMOD2,TNNT2,TPM1,TTN,XK
GO:BP	neuron projection guidance	GO:0097485	FALSE	5.88608e-06	5.23017	241	751	30	21128	BDNF,BMP7,CCDC141,CNTN4,DSCAML1,EGR2,EPHA3,EPHA5,EPHA7,EPHB4,FLRT2,FLRT3,ISL1,L1CAM,LGI1,MYOT,NCAM1,NEXN,NOVA2,NRXN1,RELN,ROBO4,SEMA3A,SEMA3D,SEMA3E,SEMA3G,SEMA5B,SEMA6A,SLIT2,WNT5A
GO:BP	positive regulation of cell population proliferation	GO:0008284	FALSE	6.95802e-06	5.15751	953	751	71	21128	ACVRL1,AGTR1,ALDH1A2,APLNR,AVPR1A,BMP6,BTC,CALCRL,CAV2,CD248,CD55,CLDN5,CNTFR,CRIP2,CTHRC1,CX3CR1,DLL4,DPP4,EDNRB,EGFL7,ERBB3,ESR1,FBLN1,FGF10,FGF9,FGFR2,FLT1,FLT4,FZD7,GAS6,GPAM,GPER1,HBEGF,HLA-DMB,ID4,IGF1,IGF2,IL12RB2,IL31RA,ISL1,JUN,KDR,LBH,MEGF10,MPL,MYOCD,NPY5R,NR4A1,NRARP,NTRK2,OSR1,OSR2,PDGFB,POU3F2,PPP1R16B,PRKCH,PTGFR,RASSF10,RBPMS2,S100B,SCG2,SFRP1,SHC4,SIX1,SMPD3,SOX10,TEK,TGFB2,THBS4…
GO:BP	regulation of angiogenesis	GO:0045765	FALSE	7.2964e-06	5.13689	287	751	33	21128	ACVRL1,ANXA3,APLNR,C3,CD34,CDH5,CLDN5,CX3CR1,DCN,ECSCR,FLT1,FUT1,HHEX,ISL1,ITGB8,KDR,KLF2,KLF4,NOS3,PPARG,PPP1R16B,RAMP2,RGCC,SEMA3E,SEMA6A,SERPINF1,SFRP1,TEK,TGFB2,THBS4,TIE1,TSPAN12,WNT5A
GO:BP	positive regulation of phosphorylation	GO:0042327	FALSE	8.07148e-06	5.09305	822	751	64	21128	ACE,ACVRL1,ADIPOQ,ADRB2,AFAP1L2,AJUBA,ANGPT1,APLNR,BDNF,BMP3,BMP6,BMP7,BTC,C3,CARD10,CCL21,CX3CR1,EDNRB,EPHA3,EPHA5,EPHA7,EPHB4,ERBB3,FGF10,FGF9,FGFR2,FLT1,FLT4,FZD7,FZD8,GAS6,GFRA1,GPD1,GPER1,GPRC5B,HBEGF,IGF1,IGF2,IL31RA,ISL1,ITGA6,ITLN1,KDR,LEFTY2,MAP2K6,NRXN1,NTRK2,PDGFB,PECAM1,PKD2,PLCG2,PPARG,RAMP3,RELN,RGCC,ROR2,SH2D3C,TEK,TF,TGFB2,THBS4,TIE1,TMEM119,WNT5A
GO:BP	response to hormone	GO:0009725	FALSE	8.45359e-06	5.07296	861	751	66	21128	ABCA3,ACE,ACTN2,ACVR1C,ADIPOQ,AGTR1,AGTR2,ALPL,ANXA3,APOB,AVPR1A,BCHE,BMP6,BMP7,CAMK2A,CAV2,CCL21,CKB,CTSK,EDNRB,EGR2,ESR1,FAM107A,FHL2,FOS,GABRB1,GPER1,GPLD1,IGF2,ISL1,LBH,LCAT,LMO3,LPL,MGARP,NOS3,NR1D2,NR4A1,NR4A2,NR5A2,OXCT1,PGR,PLCB1,PPARG,PTGER4,PTGFR,RAMP1,RAMP2,RAMP3,RARB,RXRG,SCNN1B,SERPINF1,SFRP1,SFRP4,SLC24A4,SLC26A5,SLC2A4,SLIT2,SOX10,TBC1D4,TGFB2,THRB,TIMP3,TNFSF10,ZNF366
GO:BP	blood vessel endothelial cell migration	GO:0043534	FALSE	8.91462e-06	5.0499	115	751	20	21128	ACVRL1,AGTR2,ANGPT1,CARD10,CDH5,CLEC14A,DLL4,EPHB4,GPLD1,KDR,KLF4,MEOX2,MMRN2,NOS3,NR4A1,PDGFB,PPARG,RGCC,SLIT2,SOX18
GO:BP	inorganic ion transmembrane transport	GO:0098660	FALSE	8.98139e-06	5.04666	920	751	69	21128	ACTN2,ACTN4,ADCYAP1R1,AKAP5,ANO5,APLNR,ATP1B2,ATP6V0E2,ATP6V1C2,CASQ2,CCL21,CCL3,CLIC2,CLIC5,COX1,COX3,CYTB,EDNRB,EHD3,FGF12,FHL1,GABRA4,GABRB1,GAS6,GEM,GPD1L,GPER1,GPM6A,GRIN2A,KCNA4,KCNA6,KCNB1,KCND2,KCNH2,KCNIP2,KCNJ3,KCNK5,KCNMB2,KCNN3,OSR1,PKD2,PLCG2,PLN,PLP1,PM20D1,RAMP3,REM1,RYR2,RYR3,SCARA5,SCN2B,SCN3A,SCN4B,SCN7A,SCN9A,SCNN1B,SLC1A7,SLC24A4,SLC26A4,SLC26A5,SLC8A1,THY1,TMEM175,TRPC6,TRPM3…
GO:BP	localization	GO:0051179	FALSE	1.0436e-05	4.98146	5578	751	269	21128	ABCA10,ABCA3,ABCA6,ABCA8,ABCA9,ABCD2,ABCG2,ACACB,ACE,ACKR3,ACKR4,ACTN2,ACTN4,ACVR1C,ADAM22,ADCY1,ADCYAP1R1,ADIPOQ,ADRB2,AGTR1,AJUBA,AKAP5,ANGPT1,ANO5,ANXA3,APLNR,APOB,APOD,AQP7,ARL4A,ATP1B2,ATP6V0E2,ATP6V1C2,ATP8A1,AVPR1A,AZGP1,BACH2,BDNF,BMP6,BMP7,C1QTNF3,C3,CA4,CALCRL,CAMK2A,CARD10,CASQ2,CAV2,CBLN1,CCDC141,CCL21,CCL3,CDH2,CDH23,CDH5,CFI,CHRDL1,CIDEA,CIDEC,CLEC10A,CLIC2,CLIC5,CNN2,COLQ,COX1,COX3…
GO:BP	regulation of protein phosphorylation	GO:0001932	FALSE	1.05358e-05	4.97733	1101	751	78	21128	ACE,ACVRL1,ADIPOQ,ADRB2,AFAP1L2,AJUBA,ANGPT1,APLNR,BDNF,BMP3,BMP6,BMP7,BTC,C3,CARD10,CCL21,CDH5,CDKN1C,CX3CR1,DBNDD1,EDNRB,EPHA7,ERBB3,FABP4,FBLN1,FGF10,FGF9,FLT1,FLT4,FZD8,GAS6,GFRA1,GPD1L,GPER1,GPRC5B,HBEGF,HEG1,HHEX,HYAL2,IGF1,IGF2,IL31RA,ISL1,ITLN1,JUN,KDR,LEFTY2,MAP2K6,MYOCD,NRXN1,NTRK2,PDGFB,PECAM1,PKD2,PLCG2,PPARG,PPP1R1B,PRKAR2B,PTPRB,RAMP3,RASIP1,RELN,RGCC,ROR2,SFRP1,SH2D3C,SLC8A1,SLIT2,…
GO:BP	muscle cell proliferation	GO:0033002	FALSE	1.07695e-05	4.96781	205	751	27	21128	ADIPOQ,ANGPT1,APOD,CALCRL,CAV2,CNN1,FGF9,FGFR2,FOS,GPER1,HBEGF,IGF1,JUN,MEGF10,MYOCD,NOS3,NOV,NPR3,NPY5R,OGN,PDGFB,PPARG,RBPMS2,SIX1,SMPD3,TGFB2,TPM1
GO:BP	positive regulation of monoatomic ion transport	GO:0043270	FALSE	1.08729e-05	4.96365	233	751	29	21128	ACTN2,ACTN4,ADCYAP1R1,ADRB2,AKAP5,APLNR,ATP1B2,CAMK2A,CCL3,EHD3,FGF12,FHL1,GPD1L,GPER1,KCNH2,KCNIP2,PDGFB,PKD2,PLCG2,PLP1,RAMP3,RELN,RYR2,SCN4B,SHANK3,THY1,TRPC6,WFS1,WNK2
GO:BP	cell morphogenesis involved in neuron differentiation	GO:0048667	FALSE	1.49777e-05	4.82455	577	751	50	21128	ADCY1,BDNF,BMP7,CCDC141,CDH2,CDH23,CHODL,CNTN4,COBL,DCLK1,DSCAML1,EGR2,EPHA3,EPHA5,EPHA7,EPHB4,FGFR2,FLRT2,FLRT3,ISL1,L1CAM,LGI1,MYOT,NCAM1,NEXN,NGEF,NOVA2,NR4A2,NRXN1,NTRK2,OLFM1,PCDH15,POU3F2,PTPRQ,RELN,ROBO4,S100B,SEMA3A,SEMA3D,SEMA3E,SEMA3G,SEMA5B,SEMA6A,SHANK3,SLIT2,SLITRK1,SLITRK6,THY1,WNT5A,XK
GO:BP	monoatomic cation transmembrane transport	GO:0098655	FALSE	1.54411e-05	4.81132	855	751	65	21128	ACTN2,ACTN4,ADCYAP1R1,AKAP5,APLNR,ATP1B2,ATP6V0E2,ATP6V1C2,ATP8A1,CASQ2,CCL21,CCL3,CLIC2,COX1,COX3,CYTB,EDNRB,EHD3,FGF12,FHL1,GAS6,GEM,GPD1L,GPER1,GPM6A,GRIN2A,KCNA4,KCNA6,KCNB1,KCND2,KCNH2,KCNIP2,KCNJ3,KCNK5,KCNMB2,KCNN3,OSR1,PEX5L,PIEZO2,PKD2,PLCG2,PLN,PLP1,PM20D1,RAMP3,REM1,RYR2,RYR3,SCARA5,SCN2B,SCN3A,SCN4B,SCN7A,SCN9A,SCNN1B,SLC24A4,SLC8A1,THY1,TMEM175,TRPC6,TRPM3,TRPM6,TSPAN13,TUSC3,WNK2
GO:BP	protein phosphorylation	GO:0006468	FALSE	1.76076e-05	4.7543	1571	751	100	21128	ACE,ACVR1C,ACVRL1,ADIPOQ,ADRB2,AFAP1L2,AJUBA,ANGPT1,APLNR,BDNF,BMP3,BMP6,BMP7,BTC,C3,CAMK2A,CARD10,CCL21,CDH5,CDKN1C,CX3CR1,DBNDD1,DCLK1,DMPK,EDNRB,EPHA3,EPHA5,EPHA7,EPHB4,ERBB3,FABP4,FBLN1,FGF10,FGF9,FGFR2,FLT1,FLT4,FZD8,GAS6,GFRA1,GPD1L,GPER1,GPRC5B,HBEGF,HEG1,HHEX,HYAL2,IGF1,IGF2,IL12RB2,IL31RA,ISL1,ITLN1,JUN,KDR,KLHL3,LEFTY2,LIPE,MAP2K6,MYO3A,MYOCD,NRBP2,NRK,NRXN1,NTRK2,NUAK1,PDGFB,PECAM1,PKD…
GO:BP	neuron projection morphogenesis	GO:0048812	FALSE	1.88945e-05	4.72366	635	751	53	21128	ADCY1,BDNF,BMP7,CCDC141,CDH2,CHODL,CNTN4,COBL,DCLK1,DSCAML1,EGR2,EPHA3,EPHA5,EPHA7,EPHB4,FGFR2,FLRT2,FLRT3,GPM6A,GRIP1,ISL1,L1CAM,LGI1,MYOT,NCAM1,NEXN,NGEF,NOVA2,NR4A2,NRK,NRN1,NRXN1,NTRK2,OLFM1,POU3F2,RELN,ROBO4,S100B,SEMA3A,SEMA3D,SEMA3E,SEMA3G,SEMA5B,SEMA6A,SHANK3,SLIT2,SLITRK1,SLITRK6,SPRY3,SYT17,THY1,WNT5A,XK
GO:BP	transport	GO:0006810	FALSE	1.92041e-05	4.71661	4773	751	236	21128	ABCA10,ABCA3,ABCA6,ABCA8,ABCA9,ABCD2,ABCG2,ACE,ACKR3,ACKR4,ACTN2,ACTN4,ACVR1C,ADCY1,ADCYAP1R1,ADIPOQ,ADRB2,AGTR1,AKAP5,ANGPT1,ANO5,ANXA3,APLNR,APOB,APOD,AQP7,ARL4A,ATP1B2,ATP6V0E2,ATP6V1C2,ATP8A1,AVPR1A,AZGP1,BACH2,BMP6,C1QTNF3,C3,CA4,CALCRL,CAMK2A,CASQ2,CAV2,CBLN1,CCL21,CCL3,CDH2,CDH23,CFI,CIDEC,CLEC10A,CLIC2,CLIC5,CNN2,COX1,COX3,CRABP1,CYGB,CYTB,DCLK1,DENND2A,DGKI,DMPK,DNER,DNM1,DOC2B,DPP4,DYSF…
GO:BP	positive regulation of cellular component organization	GO:0051130	FALSE	1.92261e-05	4.71611	1056	751	75	21128	ABCA3,ACTN2,ADRB2,AJUBA,AMIGO2,ANGPT1,ARHGEF15,ATP1B2,ATP8A1,BDNF,BMP7,BTC,C3,CBLN1,CCL21,CDH5,CHODL,CLDN5,CLSTN2,COBL,DCN,DOC2B,DSTN,EPHA3,ESR1,FLRT2,FLRT3,FRMD7,FSCN1,GPC3,GPER1,GPM6A,GRIP1,IGF1,IGF2,ITGA6,KDR,L1CAM,LRRN1,MGARP,MPP7,MYO3A,MYOC,NEGR1,NRXN1,NTRK2,PALM,PDGFB,PLCB1,PLCG2,PPARG,PRRT2,RASIP1,RELN,RGCC,ROR2,SCARF1,SERPINF1,SERPINI1,SFRP1,SFRP4,SHANK3,SLIT2,SLITRK1,SLITRK6,SMPD3,STMN2,…
GO:BP	skeletal system development	GO:0001501	FALSE	2.03337e-05	4.69178	547	751	48	21128	ACVRL1,ADAMTS7,ALPL,BMP3,BMP6,BMP7,CDKN1C,CLEC3A,CTSK,CYTL1,DSCAML1,FGF9,FGFR2,FREM1,GPLD1,HAND2,HOXB3,HOXD8,HYAL2,IGF1,ITGB8,JAG2,KDR,LRRC17,MAP2K6,MDFI,MYOC,NOV,NPR3,OGN,OSR1,OSR2,PKDCC,PTGER4,RAB23,RARB,RSPO2,SFRP1,SFRP4,SIX1,SMPD3,SOX6,TCF15,TGFB2,TLL1,TMEM119,WNT5A,WWOX
GO:BP	canonical Wnt signaling pathway	GO:0060070	FALSE	2.0391e-05	4.69056	299	751	33	21128	ANKRD6,CDH2,CTHRC1,DACT1,DKK2,EDNRB,FGF10,FGF9,FGFR2,FZD7,FZD8,GPC3,GPRC5B,HHEX,IGFBP6,ISL1,KLF4,LGR5,NKD1,NR4A2,NRARP,PRICKLE1,RSPO2,RSPO3,SFRP1,SFRP4,SFRP5,SOX10,SOX17,SOX7,TMEM88,WNK2,WNT5A
GO:BP	embryo development ending in birth or egg hatching	GO:0009792	FALSE	2.33287e-05	4.63211	694	751	56	21128	ACE,ACVR1C,ACVRL1,ALDH1A2,ANGPT1,APOB,BMP7,C6,CDKN1C,COBL,CTHRC1,DACT1,DHX35,DSCAML1,EXOC3L2,FGF9,FGFR2,HAND2,HEG1,HEY1,HOXB3,IGF1,IGF2,ISL1,JAG2,KLF2,KLF4,MDFI,MEOX1,MEOX2,NKD1,NOS3,NR5A2,NRARP,NXN,OSR1,OSR2,PCDH12,PDGFB,PHGDH,PKD2,PRICKLE1,RSPO3,SFRP1,SHROOM3,SIX1,SOX10,SOX17,SOX18,ST8SIA6,TCF15,TGFB2,TIE1,TMEM100,VANGL2,WNT5A
GO:BP	regulation of epithelial cell migration	GO:0010632	FALSE	2.44464e-05	4.61178	227	751	28	21128	ACVRL1,AGTR2,ANGPT1,ANXA3,CARD10,DCN,DLL4,EPB41L4B,FGF10,FLT4,FUT1,GPLD1,HBEGF,JUN,KDR,KLF4,MEOX2,MMRN2,NOS3,PDGFB,PLCG2,PPARG,RGCC,SERPINF1,SLIT2,TEK,TGFB2,WNT5A
GO:BP	plasma membrane bounded cell projection organization	GO:0120036	FALSE	2.51742e-05	4.59904	1518	751	97	21128	ABCD2,ABLIM1,ACTN2,ADCY1,AJUBA,APOD,ATP1B2,BDNF,BMP7,CAMK2A,CCDC141,CCL21,CDH2,CDH23,CHODL,CNTN4,COBL,CTHRC1,DCLK1,DGKG,DSCAML1,EFHD1,EGR2,EHD3,EMP1,EPHA3,EPHA5,EPHA7,EPHB4,FGD5,FGFR2,FLRT2,FLRT3,FRMD7,FSCN1,GFRA1,GPM6A,GRIP1,ISL1,ITGA6,ITGB4,JUN,KLF4,L1CAM,LGI1,MGARP,MYO3A,MYOC,MYOT,NCAM1,NEGR1,NEXN,NGEF,NOVA2,NR4A2,NRK,NRN1,NRXN1,NTRK2,OLFM1,PALM,PCDH15,PHGDH,PKD2,PLP1,PODXL,POU3F2,PPP1R16B,PPP…
GO:BP	cardiac muscle contraction	GO:0060048	FALSE	2.52941e-05	4.59698	134	751	21	21128	ADRA1B,CASQ2,CLIC2,CTNNA3,DSG2,DSP,EHD3,FGF12,GPD1L,KCNH2,KCNJ3,MAP2K6,PLN,RYR2,SCN2B,SCN4B,SGCD,SLC8A1,TNNT2,TPM1,TTN
GO:BP	positive regulation of transport	GO:0051050	FALSE	2.55627e-05	4.59239	905	751	67	21128	ABCA3,ABCA8,ACTN2,ACTN4,ADCYAP1R1,ADIPOQ,ADRB2,AKAP5,ANGPT1,APLNR,ATP1B2,ATP8A1,AVPR1A,BMP6,C1QTNF3,C3,CAMK2A,CCL21,CCL3,CDH2,DOC2B,EDNRB,EHD3,FABP3,FGF12,FHL1,GAS6,GPC3,GPD1L,GPER1,GPLD1,HYAL2,IGF1,ISL1,ITLN1,KCNB1,KCNH2,KCNIP2,MAP2K6,MYH10,MYOM1,MYRIP,OXCT1,PDGFB,PKD2,PLCG2,PLP1,PPARG,PRRT2,RAMP3,RELN,RGCC,RYR2,SCN4B,SEC16B,SFRP4,SHANK3,SMPD3,TF,TGFB2,THY1,TMEM30B,TRPC6,TTN,WFS1,WNK2,WNT5A
GO:BP	positive regulation of cell differentiation	GO:0045597	FALSE	2.93323e-05	4.53265	850	751	64	21128	ABI3BP,ACE,ACVRL1,ADIPOQ,AGTR1,APOB,ASPA,BDNF,BMP6,BMP7,BRINP3,CD34,CDH5,CHODL,CLDN5,CTHRC1,CX3CR1,EGR2,FNDC5,FOS,GAS6,GPER1,GPRC5B,ID4,IGF1,ISL1,KDR,L1CAM,LMO3,LPL,MPL,MYOCD,NTRK2,OLFM1,PDLIM7,PKDCC,PLA2G2A,PLCB1,PPARG,PRKCH,PROM1,RAMP2,RASSF10,RBM24,RELN,RGCC,ROR2,SERPINF1,SFRP1,SFRP4,SH3GL3,SHANK3,SIX1,SLIT2,SLITRK1,SOX10,SOX17,SOX6,TCF15,TGFB2,TMEM100,TMEM119,TPH1,ZBTB46
GO:BP	response to wounding	GO:0009611	TRUE	3.44204e-05	4.46318	574	751	49	21128	ABI3BP,ACTA2,ACVRL1,ADAMTS18,AJUBA,APOD,CD34,CNN2,CSRP1,CX3CR1,DGKG,DGKI,DSP,DYSF,ENTPD1,EPB41L4B,ERBB3,F8,FBLN1,FGF10,FGFR2,FLRT3,FZD7,GAS6,GRIN2A,HBB,HBEGF,IGF1,ISL1,ITGB4,JUN,KCNB1,KDR,KLF4,MMRN1,MPL,NOS3,NOTCH4,PDGFB,PLCG2,PPARG,SCARF1,SELP,TGFB2,THY1,TPM1,TSPAN8,VWF,WNT5A
GO:BP	striated muscle contraction	GO:0006941	FALSE	3.46424e-05	4.46039	175	751	24	21128	ADRA1B,CASQ2,CLIC2,CTNNA3,DMPK,DSG2,DSP,EHD3,FGF12,GPD1L,KCNH2,KCNJ3,MAP2K6,NR4A1,PLN,RYR2,SCN2B,SCN4B,SGCD,SLC8A1,SMPX,TNNT2,TPM1,TTN
GO:BP	regulation of intracellular signal transduction	GO:1902531	FALSE	3.81711e-05	4.41826	1725	751	106	21128	ACKR3,ACTA2,ACTN4,ADCYAP1R1,ADIPOQ,ADRA1B,ADRB2,AJUBA,AKAP5,ANGPT1,ANKRD6,APLNR,ARHGAP28,ARHGEF15,BMP6,BMP7,C10ORF71,C1QTNF3,CASP10,CAV2,CCL21,CCL3,CDH2,CX3CR1,DACT1,DCN,DGKG,DGKI,DUSP4,EPHA7,ERBB3,ESR1,FBLN1,FGD5,FGF10,FGFR2,FHL2,FLT1,FLT4,FRMD7,FZD7,FZD8,GAS6,GPD1L,GPER1,GPRC5B,GUCY1A2,HAND2,HBEGF,HEG1,HYAL2,IGF1,IGF2,IGFBP6,JUN,KDR,LBH,LMO3,LPAR4,LURAP1L,MAP2K6,MYOC,NGEF,NOV,NPY5R,NRK,NRXN1,NT…
GO:BP	positive regulation of phosphatidylinositol 3-kinase signaling	GO:0014068	FALSE	4.06239e-05	4.39122	80	751	16	21128	ANGPT1,DCN,ERBB3,FLT1,GPER1,IGF1,KDR,MYOC,NTRK2,PDGFB,RELN,ROR2,SELP,SEMA3E,TEK,TGFB2
GO:BP	anterograde trans-synaptic signaling	GO:0098916	FALSE	4.09136e-05	4.38813	724	751	57	21128	ACE,ADCY1,ADIPOQ,ADRB2,AKAP5,BCHE,BDNF,CAMK2A,CBLN1,CDH2,CDH8,CHRDL1,CLSTN2,CNTN4,COLQ,CX3CR1,DGKI,DMPK,DNM1,DOC2B,EGR2,FAM107A,FGF12,GABRA4,GABRB1,GPER1,GRIA1,GRIA2,GRIK3,GRIN2A,KCNB1,KCND2,KCNIP2,LGI1,MCTP1,MPZ,NPY5R,NR4A1,NRXN1,NSG1,NTRK2,PCDH17,PLCB1,PLCB4,PLP1,PPP1R9A,PRKAR2B,PRRT2,RELN,RIMBP2,RIMS4,ROR2,S100B,SCN2B,SHANK3,SLC1A7,TMOD2
GO:BP	chemical synaptic transmission	GO:0007268	FALSE	4.09136e-05	4.38813	724	751	57	21128	ACE,ADCY1,ADIPOQ,ADRB2,AKAP5,BCHE,BDNF,CAMK2A,CBLN1,CDH2,CDH8,CHRDL1,CLSTN2,CNTN4,COLQ,CX3CR1,DGKI,DMPK,DNM1,DOC2B,EGR2,FAM107A,FGF12,GABRA4,GABRB1,GPER1,GRIA1,GRIA2,GRIK3,GRIN2A,KCNB1,KCND2,KCNIP2,LGI1,MCTP1,MPZ,NPY5R,NR4A1,NRXN1,NSG1,NTRK2,PCDH17,PLCB1,PLCB4,PLP1,PPP1R9A,PRKAR2B,PRRT2,RELN,RIMBP2,RIMS4,ROR2,S100B,SCN2B,SHANK3,SLC1A7,TMOD2
GO:BP	connective tissue development	GO:0061448	FALSE	4.1478e-05	4.38218	277	751	31	21128	ACTA2,ACVRL1,ADAMTS7,BMP3,BMP6,BMP7,CD34,CRIP1,CTSK,CYTL1,EBF2,FGF9,GPLD1,HAND2,HOXB3,HYAL2,ID4,ITGB8,NOV,OGN,OSR1,OSR2,OXCT1,PDGFB,PKDCC,PPARG,RARB,RSPO2,SMPD3,SOX6,WNT5A
GO:BP	cell projection organization	GO:0030030	FALSE	4.30991e-05	4.36553	1556	751	98	21128	ABCD2,ABLIM1,ACTN2,ADCY1,AJUBA,APOD,ATP1B2,BDNF,BMP7,CAMK2A,CCDC141,CCL21,CDH2,CDH23,CHODL,CNTN4,COBL,CTHRC1,DCLK1,DGKG,DSCAML1,EFHD1,EGR2,EHD3,EMP1,EPHA3,EPHA5,EPHA7,EPHB4,FGD5,FGFR2,FLRT2,FLRT3,FRMD7,FSCN1,GFRA1,GPM6A,GRIP1,ISL1,ITGA6,ITGB4,JUN,KLF4,L1CAM,LGI1,MGARP,MYO3A,MYOC,MYOT,NCAM1,NEGR1,NEXN,NGEF,NOVA2,NR4A2,NRK,NRN1,NRXN1,NTRK2,OLFM1,PALM,PCDH15,PHGDH,PKD2,PLP1,PODXL,POU3F2,PPP1R16B,PPP…
GO:BP	plasma membrane bounded cell projection morphogenesis	GO:0120039	FALSE	4.36568e-05	4.35995	651	751	53	21128	ADCY1,BDNF,BMP7,CCDC141,CDH2,CHODL,CNTN4,COBL,DCLK1,DSCAML1,EGR2,EPHA3,EPHA5,EPHA7,EPHB4,FGFR2,FLRT2,FLRT3,GPM6A,GRIP1,ISL1,L1CAM,LGI1,MYOT,NCAM1,NEXN,NGEF,NOVA2,NR4A2,NRK,NRN1,NRXN1,NTRK2,OLFM1,POU3F2,RELN,ROBO4,S100B,SEMA3A,SEMA3D,SEMA3E,SEMA3G,SEMA5B,SEMA6A,SHANK3,SLIT2,SLITRK1,SLITRK6,SPRY3,SYT17,THY1,WNT5A,XK
GO:BP	regulation of nervous system development	GO:0051960	FALSE	4.75247e-05	4.32308	457	751	42	21128	ACE,AMIGO2,ASPA,BDNF,BMP7,CBLN1,CHODL,CLSTN2,CX3CR1,DLL4,EGR2,EPHA7,FLRT2,FLRT3,GPER1,HEY1,HOXB3,ID4,L1CAM,LGI4,LRRN1,NRXN1,NTRK2,PPARG,PRKCH,RASSF10,RELN,RXRG,SEMA3A,SEMA3D,SEMA3E,SEMA3G,SEMA5B,SEMA6A,SERPINF1,SHANK3,SLIT2,SLITRK1,SLITRK6,SOX10,THY1,WNT5A
GO:BP	vasculogenesis	GO:0001570	FALSE	4.89741e-05	4.31003	81	751	16	21128	ACKR3,APLNR,CD34,EGFL7,HEG1,HEY1,ITGB8,KDR,MYOCD,NTRK2,RAMP2,RASIP1,SOX17,SOX18,TIE1,TMEM100
GO:BP	regulation of canonical Wnt signaling pathway	GO:0060828	FALSE	4.92135e-05	4.30792	249	751	29	21128	ANKRD6,CDH2,CTHRC1,DACT1,DKK2,FGF10,FGF9,FGFR2,FZD7,GPC3,GPRC5B,HHEX,IGFBP6,ISL1,LGR5,NKD1,NRARP,PRICKLE1,RSPO2,RSPO3,SFRP1,SFRP4,SFRP5,SOX10,SOX17,SOX7,TMEM88,WNK2,WNT5A
GO:BP	chordate embryonic development	GO:0043009	FALSE	4.96574e-05	4.30402	672	751	54	21128	ACVR1C,ACVRL1,ALDH1A2,ANGPT1,APOB,BMP7,C6,CDKN1C,COBL,CTHRC1,DACT1,DHX35,DSCAML1,EXOC3L2,FGF9,FGFR2,HAND2,HEG1,HEY1,HOXB3,IGF1,IGF2,ISL1,JAG2,KLF2,KLF4,MDFI,MEOX1,MEOX2,NKD1,NOS3,NRARP,NXN,OSR1,OSR2,PCDH12,PDGFB,PHGDH,PKD2,PRICKLE1,RSPO3,SFRP1,SHROOM3,SIX1,SOX10,SOX17,SOX18,ST8SIA6,TCF15,TGFB2,TIE1,TMEM100,VANGL2,WNT5A
GO:BP	cell projection morphogenesis	GO:0048858	FALSE	5.63071e-05	4.24944	656	751	53	21128	ADCY1,BDNF,BMP7,CCDC141,CDH2,CHODL,CNTN4,COBL,DCLK1,DSCAML1,EGR2,EPHA3,EPHA5,EPHA7,EPHB4,FGFR2,FLRT2,FLRT3,GPM6A,GRIP1,ISL1,L1CAM,LGI1,MYOT,NCAM1,NEXN,NGEF,NOVA2,NR4A2,NRK,NRN1,NRXN1,NTRK2,OLFM1,POU3F2,RELN,ROBO4,S100B,SEMA3A,SEMA3D,SEMA3E,SEMA3G,SEMA5B,SEMA6A,SHANK3,SLIT2,SLITRK1,SLITRK6,SPRY3,SYT17,THY1,WNT5A,XK
GO:BP	trans-synaptic signaling	GO:0099537	FALSE	5.72274e-05	4.2424	731	751	57	21128	ACE,ADCY1,ADIPOQ,ADRB2,AKAP5,BCHE,BDNF,CAMK2A,CBLN1,CDH2,CDH8,CHRDL1,CLSTN2,CNTN4,COLQ,CX3CR1,DGKI,DMPK,DNM1,DOC2B,EGR2,FAM107A,FGF12,GABRA4,GABRB1,GPER1,GRIA1,GRIA2,GRIK3,GRIN2A,KCNB1,KCND2,KCNIP2,LGI1,MCTP1,MPZ,NPY5R,NR4A1,NRXN1,NSG1,NTRK2,PCDH17,PLCB1,PLCB4,PLP1,PPP1R9A,PRKAR2B,PRRT2,RELN,RIMBP2,RIMS4,ROR2,S100B,SCN2B,SHANK3,SLC1A7,TMOD2
GO:BP	regulation of heart rate	GO:0002027	FALSE	5.76299e-05	4.23935	104	751	18	21128	ADRA1B,AGTR2,AVPR1A,CASQ2,CTNNA3,DSG2,DSP,EDNRB,GPD1L,ISL1,KCNH2,KCNJ3,PLN,RYR2,SCN2B,SCN4B,SLC8A1,TPM1
GO:BP	actin filament-based movement	GO:0030048	FALSE	5.93832e-05	4.22634	128	751	20	21128	ACTA2,ACTC1,ACTN4,CTNNA3,DSG2,DSP,FGF12,GPD1L,KCNH2,KCNJ3,MYH10,MYO5B,MYO5C,PLN,RYR2,SCN2B,SCN4B,SGCD,TNNT2,TPM1
GO:BP	epithelial cell differentiation	GO:0030855	FALSE	5.95194e-05	4.22534	713	751	56	21128	ACTA2,ACVRL1,ADIPOQ,BMP6,BMP7,CD34,CDH2,CDH23,CDH5,CDKN1C,CLDN5,COL15A1,DSP,EDNRB,ESR1,FGF10,FGFR2,FZD7,HEG1,HEY1,IL31RA,JAG2,JUN,KDR,KLF2,KLF4,LBH,NOTCH4,NR5A2,OSR1,PCDH15,PDGFB,PECAM1,PGR,PLCB1,PODXL,POF1B,POU3F2,PPARG,PPP1R16B,PRKCH,PROM1,PTPRQ,RARB,ROBO4,SFRP4,SHROOM3,SIX1,SLITRK6,SOX17,SOX18,TCF15,THRB,TIE1,TMEM100,WNT5A
GO:BP	phosphorylation	GO:0016310	FALSE	5.98992e-05	4.22258	1872	751	112	21128	ACE,ACVR1C,ACVRL1,ADIPOQ,ADRB2,AFAP1L2,AJUBA,AK5,ANGPT1,APLNR,BDNF,BMP3,BMP6,BMP7,BTC,C3,CAMK2A,CARD10,CBFA2T3,CCL21,CDH5,CDKN1C,CIITA,CKB,CX3CR1,DBNDD1,DCLK1,DGKG,DGKI,DMPK,EDNRB,EPHA3,EPHA5,EPHA7,EPHB4,ERBB3,FABP4,FBLN1,FGF10,FGF9,FGFR2,FLT1,FLT4,FZD7,FZD8,GAS6,GFRA1,GPD1,GPD1L,GPER1,GPRC5B,HBEGF,HEG1,HHEX,HYAL2,IGF1,IGF2,IL12RB2,IL31RA,ISL1,ITGA6,ITLN1,JUN,KDR,KLHL3,LDB2,LEFTY2,LIPE,MAP2K6,MYO…
GO:BP	inorganic cation transmembrane transport	GO:0098662	FALSE	6.13501e-05	4.21218	828	751	62	21128	ACTN2,ACTN4,ADCYAP1R1,AKAP5,APLNR,ATP1B2,ATP6V0E2,ATP6V1C2,CASQ2,CCL21,CCL3,CLIC2,COX1,COX3,CYTB,EDNRB,EHD3,FGF12,FHL1,GAS6,GEM,GPD1L,GPER1,GPM6A,GRIN2A,KCNA4,KCNA6,KCNB1,KCND2,KCNH2,KCNIP2,KCNJ3,KCNK5,KCNMB2,KCNN3,OSR1,PKD2,PLCG2,PLN,PLP1,PM20D1,RAMP3,REM1,RYR2,RYR3,SCARA5,SCN2B,SCN3A,SCN4B,SCN7A,SCN9A,SCNN1B,SLC24A4,SLC8A1,THY1,TMEM175,TRPC6,TRPM3,TRPM6,TSPAN13,TUSC3,WNK2
GO:BP	regulation of cellular response to growth factor stimulus	GO:0090287	FALSE	6.77999e-05	4.16877	314	751	33	21128	ACVRL1,AGTR2,ASPN,CAV2,CDH5,CDKN1C,CHRDL1,CIDEA,CRIM1,DCN,FGF10,FGF9,GPC3,GREM2,HHEX,HTRA3,IL17RD,KDR,LTBP1,MMRN2,MYOCD,NRXN1,PPARG,RASL11B,RBPMS2,SEMA6A,SFRP1,SFRP4,SFRP5,SLIT2,SPRY3,TSPAN12,WNT5A
GO:BP	synaptic signaling	GO:0099536	FALSE	7.59734e-05	4.11934	756	751	58	21128	ACE,ADCY1,ADIPOQ,ADRB2,AKAP5,BCHE,BDNF,CAMK2A,CBLN1,CDH2,CDH8,CHRDL1,CLSTN2,CNTN4,COLQ,CX3CR1,DGKI,DMPK,DNM1,DOC2B,DRP2,EGR2,FAM107A,FGF12,GABRA4,GABRB1,GPER1,GRIA1,GRIA2,GRIK3,GRIN2A,KCNB1,KCND2,KCNIP2,LGI1,MCTP1,MPZ,NPY5R,NR4A1,NRXN1,NSG1,NTRK2,PCDH17,PLCB1,PLCB4,PLP1,PPP1R9A,PRKAR2B,PRRT2,RELN,RIMBP2,RIMS4,ROR2,S100B,SCN2B,SHANK3,SLC1A7,TMOD2
GO:BP	positive regulation of epithelial cell proliferation	GO:0050679	FALSE	8.33392e-05	4.07915	211	751	26	21128	ACVRL1,AGTR1,APLNR,BMP6,CAV2,EGFL7,FGF10,FGF9,FGFR2,FLT4,FZD7,IGF1,IGF2,JUN,KDR,NR4A1,NRARP,OSR1,OSR2,PDGFB,PPP1R16B,SCG2,SFRP1,TEK,THBS4,WNT5A
GO:BP	response to oxygen-containing compound	GO:1901700	FALSE	8.6464e-05	4.06316	1665	751	102	21128	ACE,ACTN2,ACVR1C,ADCY1,ADCYAP1R1,ADIPOQ,ADRB2,AGTR1,AGTR2,ALDH1A1,ALDH1A2,ALPL,APOB,APOD,AVPR1A,BCHE,BMP6,BMP7,BRINP3,CALCRL,CAMK2A,CAV2,CCL21,CCL3,CD55,CD96,CKB,CLDN5,CTSK,CX3CR1,EDNRB,EGR2,EPHA3,EPHA5,ESR1,FGF10,FGFR2,FOS,FZD7,GABRB1,GAS6,GPAM,GPD1,GPER1,GPIHBP1,GPLD1,GRIN2A,HAND2,HBB,HYAL2,IGF1,IGF2,IL12RB2,JUN,KCNB1,KLF2,KLF4,LDOC1,LPL,MAP2K6,MGARP,MN1,NOS3,NR4A1,NR4A2,NSG1,NTRK2,OSR1,OXCT1,P…
GO:BP	endothelium development	GO:0003158	FALSE	8.86864e-05	4.05214	131	751	20	21128	ACVRL1,BMP6,CD34,CDH5,CLDN5,COL15A1,DLL4,EDNRB,HEG1,HEY1,KDR,NOTCH4,PECAM1,PLCB1,PPP1R16B,ROBO4,SOX17,SOX18,TIE1,TMEM100
GO:BP	mesenchymal cell differentiation	GO:0048762	FALSE	9.06451e-05	4.04266	241	751	28	21128	ALDH1A2,BMP7,CDH2,EDNRB,EPHA3,FGF10,FGFR2,HAND2,HEY1,IGF1,IL17RD,ISL1,NOTCH4,OLFM1,OSR1,RGCC,SEMA3A,SEMA3D,SEMA3E,SEMA3G,SEMA5B,SEMA6A,SFRP1,SIX1,SOX10,TGFB2,TMEM100,WNT5A
GO:BP	regulation of cellular component biogenesis	GO:0044087	FALSE	9.07909e-05	4.04196	955	751	68	21128	ABCA3,ACE,ACVRL1,AJUBA,AMIGO2,APLNR,APOD,ARHGAP28,ARHGEF15,ASAP3,BDNF,BMP7,CBLN1,CCL21,CDH5,CLDN5,CLSTN2,COBL,COLQ,DACT1,EPHA3,EPHA7,ESR1,FAM107A,FLRT2,FLRT3,FRMD7,FSCN1,GPM6A,ISL1,KANK3,KANK4,KDR,LCAT,LDB2,LRRN1,MPP7,MYO3A,MYOC,NEGR1,NRXN1,NTRK2,PALM,PLCG2,PODXL,PPP1R16B,PRKCH,PRRT2,PTGER4,RASIP1,RGCC,SELP,SFRP1,SHANK3,SIX1,SLIT2,SLITRK1,SLITRK6,SMPD3,SPTBN1,STMN2,STXBP6,TEK,THY1,TIE1,TMOD2,TPM1…
GO:BP	positive regulation of molecular function	GO:0044093	FALSE	9.13526e-05	4.03928	1580	751	98	21128	ACE,ACTN2,ACTN4,ACVR1C,ADCY1,ADCYAP1R1,ADIPOQ,ADRB2,AFAP1L2,AGTR1,AGTR2,AJUBA,AKAP5,ANGPT1,ANXA3,ARHGEF15,ASAP3,ATP1B2,AVPR1A,BDNF,BTC,CAMK2A,CAP2,CARD10,CASP10,CAV2,CCL21,CCL3,CLDN5,CLIC2,CTHRC1,CX3CR1,CYTL1,DACT1,EBF2,EHD3,EPHA3,EPHA5,EPHA7,EPHB4,ERBB3,ESR1,FBLN1,FGF10,FGFR2,FLT1,FLT4,FZD8,GAS6,GPER1,GPIHBP1,GPLD1,GPRC5B,GRIN2A,HAND2,HBEGF,IGF1,IGF2,IRF4,ISL1,ITGA6,KCNIP2,KDR,KLF4,MAP2K6,MYOCD,…
GO:BP	cell-substrate adhesion	GO:0031589	FALSE	9.56755e-05	4.0192	367	751	36	21128	ABI3BP,ACTN2,ACTN4,ACVRL1,AJUBA,ANGPT1,APOD,ATP1B2,CCL21,CD34,CD96,ECM2,EPHA3,FAM107A,FBLN1,FBLN2,FREM1,FUT1,FZD7,GAS6,ITGA6,ITGB4,ITGB8,KDR,L1CAM,LIMS2,MYOC,PDGFB,SEMA3E,SFRP1,TEK,THSD1,THY1,TNXB,VIT,VWF
GO:BP	regulation of transmembrane receptor protein serine/threonine kinase signaling pathway	GO:0090092	FALSE	0.000106301	3.97346	273	751	30	21128	ACVRL1,ASPN,BMP3,BMP6,BMP7,CAV2,CDH5,CDKN1C,CHRDL1,CIDEA,CRIM1,FGF10,FGF9,GPC3,GREM2,HTRA3,IL17RD,KDR,LEFTY2,LTBP1,MYOCD,NOV,PPARG,RASL11B,RBPMS2,SFRP1,SFRP4,SFRP5,TGFB2,WNT5A
GO:BP	negative regulation of cell population proliferation	GO:0008285	FALSE	0.000109777	3.95949	707	751	55	21128	ABI3BP,ACKR3,ACVR1C,ACVRL1,ADIPOQ,ALDH1A2,APOD,AZGP1,BCHE,BMP7,CAV2,CBFA2T3,CDH5,CDKN1C,CNN1,DACH1,DLL4,DPT,FABP3,FBLN1,FGF10,FGFR2,FLT1,GPC3,GPER1,GPLD1,IGFBP6,ISL1,JUN,KLF4,LDOC1,LIMS2,MMRN2,MN1,MYOCD,NOS3,NOV,NPR3,OGN,PKD2,PODN,PPARG,RARB,RGCC,SCG2,SERPINF1,SFRP1,SFRP4,SFRP5,SOX10,SOX7,TGFB2,TPM1,WNK2,WNT5A
GO:BP	developmental growth	GO:0048589	FALSE	0.000116413	3.934	652	751	52	21128	ACACB,ACVR1C,ADRB2,APOD,BDNF,CDKN1C,COBL,COLQ,DCLK1,EPHA7,ESR1,FGF10,FGF9,FGFR2,FLRT3,FZD7,GPAM,HEG1,IGF1,IGF2,KLF2,L1CAM,NKD1,NOV,NPY1R,NRN1,OLFM1,PCDH15,PI16,PKDCC,PLCB1,POU3F2,RARB,RSPO2,SCNN1B,SEMA3A,SEMA3D,SEMA3E,SEMA3G,SEMA5B,SEMA6A,SFRP1,SIX1,SLIT2,SLITRK1,SLITRK6,SMPD3,SORBS2,SOX10,SYT17,TGFB2,WNT5A
GO:BP	modulation of chemical synaptic transmission	GO:0050804	FALSE	0.000121215	3.91644	455	751	41	21128	ACE,ADCY1,ADIPOQ,ADRB2,AKAP5,BCHE,BDNF,CAMK2A,CBLN1,CDH2,CHRDL1,CLSTN2,CNTN4,CX3CR1,DGKI,DMPK,DNM1,EGR2,FAM107A,GPER1,GRIA1,GRIK3,GRIN2A,KCNB1,LGI1,MCTP1,NPY5R,NRXN1,NSG1,NTRK2,PCDH17,PLCB1,PLCB4,PPP1R9A,PRKAR2B,PRRT2,RELN,RIMS4,ROR2,S100B,SHANK3
GO:BP	central nervous system development	GO:0007417	FALSE	0.000128746	3.89027	1085	751	74	21128	ACE,ACKR3,ADAM22,ADCY1,AGTR2,ALDH1A2,AMIGO2,ANXA3,APOD,ASPA,ATP1B2,AVPR1A,BMP7,C3,CBLN1,CCDC141,CDH2,CKB,CNTN4,COX1,CX3CR1,DCLK1,DLL4,DNER,DRP2,DSCAML1,EGR2,EPHA5,EPHA7,FGF10,FGF9,FGFR2,FUT1,GABRB1,GNB4,GRIN2A,HOXB3,ID4,ISL1,LHX6,MGARP,NEGR1,NOVA2,NR4A2,NRXN1,NTRK2,OXCT1,PCDH19,PHGDH,PKD2,PLCB1,PLP1,PLXDC1,POU3F2,PPARG,RARB,RELN,ROR2,S100B,SEMA3A,SEMA3E,SERPINI1,SFRP1,SH3GL3,SHANK3,SIX1,SLC8A1,SL…
GO:BP	regulation of trans-synaptic signaling	GO:0099177	FALSE	0.000128781	3.89015	456	751	41	21128	ACE,ADCY1,ADIPOQ,ADRB2,AKAP5,BCHE,BDNF,CAMK2A,CBLN1,CDH2,CHRDL1,CLSTN2,CNTN4,CX3CR1,DGKI,DMPK,DNM1,EGR2,FAM107A,GPER1,GRIA1,GRIK3,GRIN2A,KCNB1,LGI1,MCTP1,NPY5R,NRXN1,NSG1,NTRK2,PCDH17,PLCB1,PLCB4,PPP1R9A,PRKAR2B,PRRT2,RELN,RIMS4,ROR2,S100B,SHANK3
GO:BP	smooth muscle cell proliferation	GO:0048659	FALSE	0.00013355	3.87436	147	751	21	21128	ADIPOQ,APOD,CALCRL,CNN1,FGF9,FGFR2,GPER1,HBEGF,IGF1,JUN,MYOCD,NOS3,NOV,NPR3,NPY5R,OGN,PDGFB,PPARG,RBPMS2,SMPD3,TPM1
GO:BP	mesenchyme morphogenesis	GO:0072132	FALSE	0.000136481	3.86493	56	751	13	21128	ACTA2,ACTC1,ACTG2,ACVRL1,APLNR,BMP7,HEY1,ISL1,NOS3,OSR1,TGFB2,TMEM100,WNT5A
GO:BP	negative regulation of cell differentiation	GO:0045596	FALSE	0.000136926	3.86351	674	751	53	21128	ACVRL1,ADAMTS7,ADIPOQ,BDNF,BMP7,CCL3,CNTN4,CRIM1,CXCL14,DTX1,EDNRB,EPHA7,FGF10,FGF9,FZD7,GPER1,HAND2,HEY1,ID4,IGF1,IGF2,IL17RD,ISL1,LBH,LRRC17,MIXL1,MYOCD,NOTCH4,NOV,NRARP,OSR1,PDGFB,PI16,PPARG,PRICKLE1,RARB,RBPMS2,SEMA3A,SEMA3D,SEMA3E,SEMA3G,SEMA5B,SEMA6A,SFRP1,SOX10,SOX6,TCF15,TGFB2,THY1,TMEM119,TMEM176A,WNT5A,ZBTB46
GO:BP	biomineral tissue development	GO:0031214	FALSE	0.000138332	3.85908	174	751	23	21128	ADRB2,ALPL,ASPN,BMP6,BMP7,CCL3,CLEC3B,FGFR2,GAS6,GPC3,HEY1,IGF1,NOS3,OMD,OSR1,OSR2,PKDCC,ROR2,RSPO2,SLC24A4,SLC8A1,SMPD3,TMEM119
GO:BP	bone mineralization	GO:0030282	FALSE	0.000139429	3.85565	122	751	19	21128	ADRB2,ALPL,ASPN,BMP6,BMP7,CCL3,CLEC3B,FGFR2,GPC3,IGF1,OMD,OSR1,OSR2,PKDCC,ROR2,RSPO2,SLC8A1,SMPD3,TMEM119
GO:BP	cell part morphogenesis	GO:0032990	FALSE	0.000143679	3.84261	675	751	53	21128	ADCY1,BDNF,BMP7,CCDC141,CDH2,CHODL,CNTN4,COBL,DCLK1,DSCAML1,EGR2,EPHA3,EPHA5,EPHA7,EPHB4,FGFR2,FLRT2,FLRT3,GPM6A,GRIP1,ISL1,L1CAM,LGI1,MYOT,NCAM1,NEXN,NGEF,NOVA2,NR4A2,NRK,NRN1,NRXN1,NTRK2,OLFM1,POU3F2,RELN,ROBO4,S100B,SEMA3A,SEMA3D,SEMA3E,SEMA3G,SEMA5B,SEMA6A,SHANK3,SLIT2,SLITRK1,SLITRK6,SPRY3,SYT17,THY1,WNT5A,XK
GO:BP	establishment of localization	GO:0051234	FALSE	0.000144544	3.84	4933	751	238	21128	ABCA10,ABCA3,ABCA6,ABCA8,ABCA9,ABCD2,ABCG2,ACE,ACKR3,ACKR4,ACTN2,ACTN4,ACVR1C,ADCY1,ADCYAP1R1,ADIPOQ,ADRB2,AGTR1,AKAP5,ANGPT1,ANO5,ANXA3,APLNR,APOB,APOD,AQP7,ARL4A,ATP1B2,ATP6V0E2,ATP6V1C2,ATP8A1,AVPR1A,AZGP1,BACH2,BMP6,C1QTNF3,C3,CA4,CALCRL,CAMK2A,CASQ2,CAV2,CBLN1,CCL21,CCL3,CDH2,CDH23,CFI,CIDEC,CLEC10A,CLIC2,CLIC5,CNN2,COLQ,COX1,COX3,CRABP1,CYGB,CYTB,DCLK1,DENND2A,DGKI,DMPK,DNER,DNM1,DOC2B,DPP4…
GO:BP	cellular response to organic substance	GO:0071310	FALSE	0.000144899	3.83894	1993	751	116	21128	ACE,ACKR3,ACKR4,ACTN2,ACTN4,ADAMTS7,ADCY1,ADIPOQ,ADRB2,AGTR1,AGTR2,ALDH1A2,ALPL,ANGPT1,APOB,BMP6,BMP7,BRINP3,CALCRL,CAMK2A,CASQ2,CAV2,CCL21,CCL3,CD55,CIITA,CKB,CLEC3B,CNTFR,CTSK,CX3CR1,DTX1,EDNRB,EGR2,EPHA3,EPHA5,ESR1,FABP4,FAM107A,FGFR2,FOS,FZD7,GABRB1,GAS6,GBP4,GPD1,GPER1,GPLD1,GREM2,HAND2,HYAL2,IFI27,IGF1,IGF2,IL12RB2,IL17RD,IL31RA,ISL1,JUN,KCNB1,KLF2,KLF4,LBH,LDOC1,LMO3,LPL,MAP2K6,MGARP,MN1,M…
GO:BP	regulation of Wnt signaling pathway	GO:0030111	FALSE	0.000155065	3.80949	325	751	33	21128	ANKRD6,ATP6V1C2,CDH2,CTHRC1,DACT1,DKK2,FGF10,FGF9,FGFR2,FZD7,GPC3,GPRC5B,HHEX,IGFBP6,ISL1,LGR5,MDFI,NKD1,NRARP,NXN,PRICKLE1,RSPO2,RSPO3,SFRP1,SFRP4,SFRP5,SOX10,SOX17,SOX7,TMEM88,WNK2,WNT5A,WWOX
GO:BP	non-canonical Wnt signaling pathway	GO:0035567	FALSE	0.000176609	3.75299	67	751	14	21128	ANKRD6,CTHRC1,DACT1,FZD7,GPC3,MYOC,NKD1,PRICKLE1,ROR2,RSPO3,SFRP1,SFRP4,VANGL2,WNT5A
GO:BP	negative chemotaxis	GO:0050919	FALSE	0.00018199	3.73995	48	751	12	21128	DPP4,EPHA7,FLRT2,FLRT3,SEMA3A,SEMA3D,SEMA3E,SEMA3G,SEMA5B,SEMA6A,SLIT2,WNT5A
GO:BP	cardiac chamber morphogenesis	GO:0003206	FALSE	0.000182194	3.73947	124	751	19	21128	APLNR,BMP7,DLL4,DSP,FGFR2,FHL2,HAND2,HEG1,HEY1,ISL1,NOS3,NPY5R,RYR2,SLIT2,TEK,TGFB2,TNNT2,TPM1,WNT5A
GO:BP	endothelial cell differentiation	GO:0045446	FALSE	0.000188674	3.72429	112	751	18	21128	ACVRL1,BMP6,CDH5,CLDN5,COL15A1,EDNRB,HEG1,HEY1,KDR,NOTCH4,PECAM1,PLCB1,PPP1R16B,ROBO4,SOX17,SOX18,TIE1,TMEM100
GO:BP	vascular process in circulatory system	GO:0003018	FALSE	0.000194605	3.71085	265	751	29	21128	ABCG2,ACE,ACTA2,ADRA1B,ADRB2,AGTR1,AGTR2,ANGPT1,ATP1B2,ATP8A1,AVPR1A,BMP6,CDH5,CLDN5,EDNRB,GPER1,GRIP2,HBB,KCNMB2,KLF2,NOS3,NPR3,PLVAP,RAMP2,SCNN1B,SLC2A4,SLC8A1,SLIT2,TEK
GO:BP	glomerulus development	GO:0032835	FALSE	0.000215199	3.66716	68	751	14	21128	ACTA2,ADIPOQ,AGTR2,ANGPT1,BMP7,CD34,EDNRB,ENPEP,OSR1,PDGFB,PECAM1,PODXL,PROM1,TEK
GO:BP	regulation of blood pressure	GO:0008217	FALSE	0.000233391	3.63192	193	751	24	21128	ACE,ACTA2,ACVRL1,ADIPOQ,ADRA1B,ADRB2,AGTR1,AGTR2,AVPR1A,CD34,EDNRB,ENPEP,GAS6,GRIP2,HBB,NOS3,NPR3,NPY1R,PDGFB,PPARG,RAMP2,SCNN1B,SUCNR1,TPM1
GO:BP	regulation of endothelial cell migration	GO:0010594	FALSE	0.000283923	3.5468	167	751	22	21128	ACVRL1,AGTR2,ANGPT1,ANXA3,CARD10,DCN,DLL4,FLT4,FUT1,GPLD1,KDR,KLF4,MEOX2,MMRN2,NOS3,PDGFB,PPARG,RGCC,SERPINF1,SLIT2,TEK,WNT5A
GO:BP	regulation of smooth muscle cell proliferation	GO:0048660	FALSE	0.000349061	3.4571	142	751	20	21128	ADIPOQ,APOD,CALCRL,CNN1,FGF9,FGFR2,GPER1,HBEGF,IGF1,JUN,MYOCD,NOS3,NPR3,NPY5R,OGN,PDGFB,PPARG,RBPMS2,SMPD3,TPM1
GO:BP	calcium ion transport	GO:0006816	FALSE	0.000350688	3.45508	438	751	39	21128	ACE,ADCYAP1R1,AKAP5,APLNR,CALCRL,CAMK2A,CASQ2,CCL21,CCL3,CDH23,CLIC2,EDNRB,EHD3,GAS6,GEM,GPER1,GPM6A,GRIN2A,IL16,NOS3,PDGFB,PKD2,PLCG2,PLN,PLP1,RAMP1,RAMP2,RAMP3,REM1,RYR2,RYR3,SLC24A4,SLC8A1,THY1,TRPC6,TRPM3,TRPM6,TSPAN13,WFS1
GO:BP	homophilic cell adhesion via plasma membrane adhesion molecules	GO:0007156	FALSE	0.000390275	3.40863	170	751	22	21128	AMIGO2,CDH2,CDH23,CDH5,CDH8,CLSTN2,CNTN4,DSCAML1,DSG2,HMCN1,L1CAM,MPZL2,MYOT,NEXN,PCDH1,PCDH12,PCDH15,PCDH17,PCDH19,PCDH20,PECAM1,ROBO4
GO:BP	action potential	GO:0001508	FALSE	0.000392515	3.40614	143	751	20	21128	CTNNA3,DSG2,DSP,FGF12,GPD1L,GPER1,KCNB1,KCND2,KCNH2,KCNIP2,KCNJ3,KCNMB2,NTRK2,RYR2,SCN2B,SCN3A,SCN4B,SCN7A,SCN9A,SLC8A1
GO:BP	chemical homeostasis	GO:0048878	FALSE	0.000406146	3.39132	1014	751	69	21128	ABCA3,ACE,ADIPOQ,AGTR1,ALPL,APLNR,APOB,ATP1B2,ATP6V0E2,AVPR1A,BMP6,C1QTNF3,CASQ2,CAV2,CCL21,CCL3,CDH23,CDH5,CKB,CLIC2,DMPK,EDNRB,EPHA5,FABP3,FABP4,GAS6,GPAM,GPER1,GPIHBP1,GPLD1,GRIA1,HYAL2,KCNB1,KCNH2,KDR,KLHL3,LCAT,LPL,MTTP,MYO5B,NR1D2,NR5A2,OXCT1,PKD2,PLCG2,PLN,PPARG,PRND,RYR2,RYR3,SCARA5,SCN7A,SCNN1B,SERPINF1,SFRP4,SGCD,SLC24A4,SLC26A4,SLC2A4,SLC8A1,SUCNR1,TF,THY1,TMEM175,TRPC6,WFS1,WNK2,WNT5A…
GO:BP	regulation of transporter activity	GO:0032409	FALSE	0.000406547	3.39089	290	751	30	21128	ACTN2,ACTN4,ADIPOQ,ADRB2,AKAP5,ATP1B2,CASQ2,CLIC2,EHD3,FGF12,FHL1,GEM,GPD1L,GSG1L,KCNIP2,NRXN1,OSR1,PKD2,PLCG2,PLN,PM20D1,PPARG,RELN,REM1,RYR2,SCN2B,SCN4B,SHANK3,TRPC6,WNK2
GO:BP	response to lipid	GO:0033993	FALSE	0.000408552	3.38875	913	751	64	21128	ABCA3,ACE,ADCY1,ADCYAP1R1,ADIPOQ,ALDH1A2,ALPL,ANXA3,APOB,AVPR1A,BCHE,BMP6,BMP7,BRINP3,CCL21,CCL3,CD55,CD96,CX3CR1,EDNRB,EPHA3,ESR1,FAM107A,FGF10,FGFR2,FOS,FZD7,GABRB1,GPER1,GPLD1,HAND2,IL12RB2,ISL1,KLF4,LBH,LCAT,LDOC1,LMO3,LPL,MGARP,MN1,NOS3,NR4A1,OSR1,PALM3,PGR,PLCB1,PLCG2,PPARG,PTGER4,PTGFR,RAMP3,RXRG,SCD,SCNN1B,SELP,SERPINF1,SFRP1,SLIT2,SOX10,TGFB2,TIE1,WNT5A,ZNF366
GO:BP	regulation of synapse organization	GO:0050807	FALSE	0.000432296	3.36422	214	751	25	21128	AMIGO2,ARHGEF15,BDNF,C1QL3,CBLN1,CDH2,CDH8,CLSTN2,COLQ,DMPK,EPHA7,FLRT2,FLRT3,GPM6A,LRRN1,NEGR1,NGEF,NRXN1,NTRK2,RELN,SHANK3,SIX1,SLITRK1,SLITRK6,WNT5A
GO:BP	developmental maturation	GO:0021700	FALSE	0.000437328	3.35919	307	751	31	21128	ACVRL1,ADAMTS7,ALDH1A2,ARHGEF15,C3,CCL21,CDH5,CDKN1C,CHRDL1,CX3CR1,EDNRB,IGF1,KCNB1,KCNIP2,KDR,KLF2,LGI4,LHX6,MYOC,NR4A2,NRXN1,PALM,PGR,PPARG,RELN,SCARF1,SLC24A4,SOX10,SOX18,TGFB2,WNT5A
GO:BP	negative regulation of endothelial cell migration	GO:0010596	FALSE	0.000473156	3.325	52	751	12	21128	ACVRL1,AGTR2,CARD10,DCN,DLL4,KLF4,MEOX2,MMRN2,PPARG,RGCC,SERPINF1,SLIT2
GO:BP	positive regulation of gene expression	GO:0010628	FALSE	0.00047465	3.32363	1163	751	76	21128	ACTA2,ACTC1,ACTG2,ADIPOQ,AFAP1L2,ALDH1A2,ANGPT1,APOB,BMP6,BMP7,C1QTNF3,C3,CCL3,CD34,CD55,CDH5,CLDN5,CLEC3B,CNN2,DLL4,EPB41L4B,ERBB3,ESR1,FBLN1,FGF10,FGF9,FLT4,GAS6,GPER1,GPRC5B,HAND2,HEG1,HEY1,HYAL2,ID4,IGF1,IL12RB2,IL16,IRF4,ISL1,ITGB8,KLF4,LPL,MYOCD,MYOM1,NOS3,NRXN1,NTRK2,OLFM1,OSR1,OSR2,PDGFB,PGR,PKD2,PLCB1,PLCG2,PLP1,PPARG,PTGER4,PTGFR,RAMP2,RAMP3,RBM24,RBM38,RGCC,SAMD4A,SEC16B,SFRP4,SLC24A4,…
GO:BP	embryonic organ development	GO:0048568	FALSE	0.000482102	3.31686	461	751	40	21128	ALDH1A2,APLNR,ASB2,BMP7,CDH23,CDKN1C,COBL,CTHRC1,DSCAML1,FGF10,FGF9,FGFR2,HAND2,HEY1,HOXB3,IGF2,KDR,MDFI,MFAP5,MYO3A,OSR1,OSR2,PCDH12,PCDH15,PDGFB,PKD2,PKDCC,PTPRQ,RARB,RBPMS2,RSPO3,RYR2,SIX1,SLITRK6,SOX17,SOX18,TGFB2,TPO,VANGL2,WNT5A
GO:BP	digestive system development	GO:0055123	FALSE	0.000494658	3.3057	145	751	20	21128	ALDH1A2,CDKN1C,COBL,DACT1,EDNRB,FGF10,FGF9,FGFR2,IGF2,MIXL1,MYOCD,PKDCC,RARB,RBPMS2,SFRP1,SFRP5,SOX10,SOX17,TGFB2,WNT5A
GO:BP	positive regulation of cell junction assembly	GO:1901890	FALSE	0.000510846	3.29171	107	751	17	21128	AMIGO2,BDNF,CBLN1,CLDN5,CLSTN2,FLRT2,FLRT3,KDR,LRRN1,MYOC,NRXN1,NTRK2,SFRP1,SLITRK1,SLITRK6,TEK,THY1
GO:BP	regulation of growth	GO:0040008	FALSE	0.000526269	3.27879	627	751	49	21128	ACACB,ACVRL1,ADRB2,AGTR1,AGTR2,AVPR1A,BDNF,COLQ,CRIM1,EPHA7,FAM107A,FGF9,FGFR2,FHL1,GPAM,GPC3,HBEGF,HYAL2,IGF1,IGF2,IGFBPL1,KAZALD1,KIF26A,L1CAM,LGI1,MYOCD,N6AMT1,NKD1,NOV,NPY1R,OLFM1,PI16,PLCB1,POU3F2,PPARG,SEMA3A,SEMA3D,SEMA3E,SEMA3G,SEMA5B,SEMA6A,SFRP1,SIX1,SLIT2,SOX17,SYT17,TGFB2,WFS1,WNT5A
GO:BP	peripheral nervous system development	GO:0007422	FALSE	0.000546555	3.26237	84	751	15	21128	ADAM22,BDNF,EDNRB,EGR2,ERBB3,HAND2,ISL1,ITGB4,LGI4,MYOC,NTRK2,POU3F2,RXRG,SERPINI1,SOX10
GO:BP	positive regulation of metabolic process	GO:0009893	FALSE	0.000580023	3.23655	3857	751	192	21128	ABCD2,ACE,ACTA2,ACTC1,ACTG2,ACTN2,ACTN4,ACVR1C,ACVRL1,ADCYAP1R1,ADIPOQ,ADRB2,AFAP1L2,AGTR1,AGTR2,AJUBA,ALDH1A2,ALPL,ANGPT1,ANXA3,APLNR,APOB,AVPR1A,BDNF,BMP3,BMP6,BMP7,BTC,C1QTNF3,C3,CARD10,CASP10,CASZ1,CBFA2T3,CCL21,CCL3,CD34,CD55,CDH5,CDKN1C,CIITA,CLDN5,CLEC3B,CNN2,CREB5,CSRNP3,CX3CR1,CYTL1,DACT1,DBP,DCN,DDAH2,DLL4,DTX1,EBF2,EBF3,ECSCR,EDNRB,EGR2,EPB41L4B,EPHA3,EPHA5,EPHA7,EPHB4,ERBB3,ESR1,FABP3…
GO:BP	Wnt signaling pathway, planar cell polarity pathway	GO:0060071	FALSE	0.000592018	3.22767	53	751	12	21128	ANKRD6,CTHRC1,DACT1,FZD7,GPC3,NKD1,PRICKLE1,ROR2,RSPO3,SFRP1,VANGL2,WNT5A
GO:BP	regulation of neuron projection development	GO:0010975	FALSE	0.000593668	3.22646	447	751	39	21128	ATP1B2,BDNF,BMP7,CDH2,CHODL,COBL,DGKG,EPHA3,EPHA7,FRMD7,ITGA6,KLF4,L1CAM,MGARP,NEGR1,NGEF,NOVA2,NRXN1,NTRK2,POU3F2,RELN,ROR2,SCARF1,SEMA3A,SEMA3D,SEMA3E,SEMA3G,SEMA5B,SEMA6A,SERPINF1,SERPINI1,SFRP1,SHANK3,SLIT2,SLITRK1,STMN2,THY1,WNT5A,XK
GO:BP	positive regulation of protein phosphorylation	GO:0001934	FALSE	0.000609604	3.21495	745	751	55	21128	ACE,ACVRL1,ADIPOQ,ADRB2,AFAP1L2,AJUBA,ANGPT1,APLNR,BDNF,BMP3,BMP6,BMP7,BTC,C3,CARD10,CCL21,CX3CR1,EDNRB,EPHA7,ERBB3,FGF10,FGF9,FLT1,FLT4,FZD8,GAS6,GFRA1,GPER1,GPRC5B,HBEGF,IGF1,IGF2,IL31RA,ISL1,ITLN1,KDR,LEFTY2,MAP2K6,NRXN1,NTRK2,PDGFB,PECAM1,PKD2,PLCG2,PPARG,RAMP3,RELN,RGCC,ROR2,SH2D3C,TEK,TGFB2,THBS4,TMEM119,WNT5A
GO:BP	sensory organ development	GO:0007423	FALSE	0.00065214	3.18566	594	751	47	21128	ACVRL1,ADAMTS18,ALDH1A2,ANGPTL7,ARHGEF15,BMP6,BMP7,CDH23,CDKN1C,CHRDL1,CTHRC1,CXCL14,CYTL1,DCLK1,DLL4,FGF10,FGF9,FGFR2,FLT1,GPM6A,HAND2,IMPG2,JAG2,JUN,KDR,KLF4,LGR5,MFAP5,MYO3A,NKD1,NTRK2,OSR1,OSR2,PCDH15,PROM1,PTPRQ,RARB,SERPINF1,SIX1,SLC26A5,SLITRK6,TCF15,TGFB2,THRB,THY1,TSPAN12,WNT5A
GO:BP	regulation of monoatomic cation transmembrane transport	GO:1904062	FALSE	0.000653161	3.18498	329	751	32	21128	ACTN2,ACTN4,ADCYAP1R1,AKAP5,APLNR,ATP1B2,CASQ2,CLIC2,EHD3,FGF12,FHL1,GEM,GPD1L,GPER1,GRIN2A,KCNH2,KCNIP2,OSR1,PKD2,PLCG2,PLN,PLP1,PM20D1,RAMP3,REM1,RYR2,SCN2B,SCN4B,SLC8A1,THY1,TSPAN13,WNK2
GO:BP	positive regulation of transmembrane transport	GO:0034764	FALSE	0.000727329	3.13827	235	751	26	21128	ACTN2,ACTN4,ADCYAP1R1,ADIPOQ,ADRB2,AKAP5,APLNR,ATP1B2,C3,EHD3,GPC3,GPER1,IGF1,ITLN1,KCNH2,KCNIP2,PKD2,PLCG2,PLP1,RAMP3,RELN,RYR2,SHANK3,THY1,TRPC6,WNK2
GO:BP	regulation of synapse structure or activity	GO:0050803	FALSE	0.000735651	3.13333	220	751	25	21128	AMIGO2,ARHGEF15,BDNF,C1QL3,CBLN1,CDH2,CDH8,CLSTN2,COLQ,DMPK,EPHA7,FLRT2,FLRT3,GPM6A,LRRN1,NEGR1,NGEF,NRXN1,NTRK2,RELN,SHANK3,SIX1,SLITRK1,SLITRK6,WNT5A
GO:BP	regulation of phosphatidylinositol 3-kinase signaling	GO:0014066	FALSE	0.000769195	3.11396	110	751	17	21128	ANGPT1,DCN,ERBB3,FLT1,GPER1,IGF1,KDR,MYOC,NTRK2,PDGFB,PPP1R16B,RELN,ROR2,SELP,SEMA3E,TEK,TGFB2
GO:BP	response to calcium ion	GO:0051592	TRUE	0.000775463	3.11044	149	751	20	21128	ADCY1,CASQ2,CPNE4,FOS,GPLD1,JUN,KCNB1,KCNIP2,KCNMB2,MTTP,NRXN1,PKD2,PLCG2,RYR2,RYR3,SUCNR1,SYT17,TNNT2,TTN,WNT5A
GO:BP	positive regulation of intracellular signal transduction	GO:1902533	FALSE	0.000903794	3.04393	995	751	67	21128	ACKR3,ACTA2,ACTN4,ADCYAP1R1,ADIPOQ,ADRA1B,ADRB2,AJUBA,AKAP5,ANGPT1,ANKRD6,BMP6,C10ORF71,CASP10,CAV2,CCL21,CCL3,CDH2,CX3CR1,DCN,DGKI,ERBB3,FGF10,FGFR2,FLT1,FLT4,FRMD7,FZD7,FZD8,GAS6,GPER1,GPRC5B,GUCY1A2,HAND2,HBEGF,IGF1,IGF2,IGFBP6,JUN,KDR,LPAR4,LURAP1L,MAP2K6,MYOC,NPY5R,NRXN1,NTRK2,PDGFB,PLA2G2A,PLCB1,PLCG2,PLEKHG5,PPARG,RAMP3,RELN,ROR2,S100B,SELP,SEMA3A,SEMA3E,TEK,TGFB2,TNFRSF19,TNFSF10,UBD,VWF,…
GO:BP	actin-mediated cell contraction	GO:0070252	FALSE	0.000908451	3.0417	99	751	16	21128	ACTA2,ACTC1,CTNNA3,DSG2,DSP,FGF12,GPD1L,KCNH2,KCNJ3,PLN,RYR2,SCN2B,SCN4B,SGCD,TNNT2,TPM1
GO:BP	regulation of kinase activity	GO:0043549	FALSE	0.000946685	3.02379	775	751	56	21128	ACE,ADIPOQ,ADRB2,AFAP1L2,AJUBA,ANGPT1,BMP7,BTC,CARD10,CCL21,CDKN1C,DBNDD1,EPHA3,EPHA5,EPHA7,EPHB4,ERBB3,FABP4,FGFR2,FLT1,FLT4,FZD8,GAS6,GPRC5B,HBEGF,HEG1,HHEX,HYAL2,IGF1,IGF2,KDR,LDB2,MAP2K6,MYOCD,NRXN1,NTRK2,PDGFB,PKD2,PPARG,PPP1R1B,PRKAR2B,PTPRB,RASIP1,RELN,RGCC,ROR2,SFRP1,SLC8A1,SPRY3,TEK,TGFB2,THY1,TIE1,TNXB,TTN,WNT5A
GO:BP	positive regulation of Wnt signaling pathway	GO:0030177	FALSE	0.00101875	2.99193	138	751	19	21128	ANKRD6,ATP6V1C2,DACT1,DKK2,FGF10,FGF9,FGFR2,GPC3,GPRC5B,HHEX,LGR5,NKD1,NRARP,RSPO2,RSPO3,SFRP1,SFRP4,WNK2,WNT5A
GO:BP	wound healing	GO:0042060	FALSE	0.00109013	2.96252	440	751	38	21128	ABI3BP,ACTA2,ACVRL1,ADAMTS18,AJUBA,CD34,CNN2,CSRP1,DGKG,DGKI,DSP,DYSF,ENTPD1,EPB41L4B,ERBB3,F8,FBLN1,FGF10,FGFR2,FZD7,GAS6,HBB,HBEGF,IGF1,KDR,MMRN1,MPL,NOS3,NOTCH4,PDGFB,PLCG2,PPARG,SELP,TGFB2,TPM1,TSPAN8,VWF,WNT5A
GO:BP	regulation of transmembrane transporter activity	GO:0022898	FALSE	0.00123852	2.9071	273	751	28	21128	ACTN2,ACTN4,ADRB2,AKAP5,ATP1B2,CASQ2,CLIC2,EHD3,FGF12,FHL1,GEM,GPD1L,GSG1L,KCNIP2,NRXN1,OSR1,PKD2,PLCG2,PLN,PM20D1,RELN,REM1,RYR2,SCN2B,SCN4B,SHANK3,TRPC6,WNK2
GO:BP	cardiac chamber development	GO:0003205	FALSE	0.0013309	2.87585	168	751	21	21128	ADAMTS6,APLNR,BMP7,DLL4,DSP,FGFR2,FHL2,HAND2,HEG1,HEY1,ISL1,MYOCD,NOS3,NPY5R,RYR2,SLIT2,TEK,TGFB2,TNNT2,TPM1,WNT5A
GO:BP	regulation of establishment of planar polarity	GO:0090175	FALSE	0.0013777	2.86085	57	751	12	21128	ANKRD6,CTHRC1,DACT1,FZD7,GPC3,NKD1,PRICKLE1,ROR2,RSPO3,SFRP1,VANGL2,WNT5A
GO:BP	head development	GO:0060322	FALSE	0.00137918	2.86038	844	751	59	21128	ACE,ADCY1,AGTR2,ALDH1A2,AMIGO2,ANXA3,APOD,ATP1B2,AVPR1A,BMP7,CBLN1,CCDC141,CDH2,CKB,CLDN5,CNTN4,COX1,CRISPLD1,CX3CR1,DCLK1,DSCAML1,EGR2,EPHA5,EPHA7,FGF10,FGF9,FGFR2,FLRT3,FUT1,GNB4,GRIN2A,HOXB3,ID4,ISL1,LHX6,MGARP,NEGR1,NR4A2,NRXN1,NTRK2,OSR2,OXCT1,PCDH19,PHGDH,PLCB1,PLP1,POU3F2,RARB,RELN,SEMA3A,SEMA3E,SFRP1,SHANK3,SIX1,SLC8A1,SLIT2,SOX6,TSPAN2,WNT5A
GO:BP	kidney vasculature development	GO:0061440	FALSE	0.00143489	2.84318	30	751	9	21128	ACTA2,ANGPT1,BMP7,CD34,OSR1,PDGFB,PECAM1,PKD2,TEK
GO:BP	renal system vasculature development	GO:0061437	FALSE	0.00143489	2.84318	30	751	9	21128	ACTA2,ANGPT1,BMP7,CD34,OSR1,PDGFB,PECAM1,PKD2,TEK
GO:BP	renal system process	GO:0003014	FALSE	0.00148276	2.82893	128	751	18	21128	ABCG2,ACE,ADIPOQ,AGTR1,AGTR2,AVPR1A,CD34,EDNRB,GAS6,HBB,HYAL2,KLHL3,MYO5B,NPR3,PDGFB,PON3,SUCNR1,WFS1
GO:BP	regulation of response to external stimulus	GO:0032101	FALSE	0.00150309	2.82302	1030	751	68	21128	ACE,ADAMTS18,ADIPOQ,AGTR1,BCL6B,BMP6,C1QTNF3,C3,CALCRL,CCL21,CCL3,CD34,CD55,CD96,CDH5,COCH,CX3CR1,CXCL14,DNASE1L3,DPP4,EDNRB,ESR1,FABP4,FGF10,GAS6,GPER1,GPRC5B,HYAL2,IGF1,IL16,IRF4,ISL1,KDR,KLF4,LPL,MAP2K6,MGLL,MMP28,MMRN1,MMRN2,MN1,NOS3,NOV,NOVA2,NPY5R,NR1D2,NRXN1,PDGFB,PLA2G2A,PLCG2,PPARG,PTGER4,SCARF1,SCG2,SEMA3A,SEMA3D,SEMA3E,SEMA3G,SEMA5B,SEMA6A,SERPINF1,SLIT2,SUCNR1,TEK,THBS4,TRIL,TSPAN8,WN…
GO:BP	ERK1 and ERK2 cascade	GO:0070371	FALSE	0.00152804	2.81586	325	751	31	21128	ACKR3,ACTA2,ADIPOQ,ANGPT1,CCL21,CCL3,DUSP4,EPHA7,FBLN1,FGF10,FGFR2,FLT4,GAS6,GPER1,HAND2,IGF1,JUN,KDR,LMO3,NPY5R,NRXN1,PDGFB,PLA2G2A,PTGER4,RAMP3,SEMA6A,SPRY3,TEK,TF,TIMP3,WNK2
GO:BP	negative regulation of Wnt signaling pathway	GO:0030178	FALSE	0.00162206	2.78993	170	751	21	21128	ANKRD6,CDH2,CTHRC1,DACT1,DKK2,FGF9,GPC3,IGFBP6,ISL1,MDFI,NKD1,NXN,PRICKLE1,SFRP1,SFRP4,SFRP5,SOX10,SOX17,TMEM88,WNT5A,WWOX
GO:BP	response to BMP	GO:0071772	FALSE	0.00162206	2.78993	170	751	21	21128	ACVRL1,ADAMTS7,BMP6,BMP7,CDH5,CHRDL1,CRIM1,GPC3,GREM2,HTRA3,KDR,LEFTY2,PPARG,RBPMS2,SFRP1,SFRP4,SFRP5,SMPD3,TGFB2,TMEM100,WNT5A
GO:BP	cellular response to BMP stimulus	GO:0071773	FALSE	0.00162206	2.78993	170	751	21	21128	ACVRL1,ADAMTS7,BMP6,BMP7,CDH5,CHRDL1,CRIM1,GPC3,GREM2,HTRA3,KDR,LEFTY2,PPARG,RBPMS2,SFRP1,SFRP4,SFRP5,SMPD3,TGFB2,TMEM100,WNT5A
GO:BP	positive regulation of MAPK cascade	GO:0043410	FALSE	0.0016967	2.7704	484	751	40	21128	ACKR3,ACTA2,ADRA1B,ADRB2,AJUBA,ANGPT1,ANKRD6,CAV2,CCL21,CCL3,CDH2,FGF10,FGFR2,FLT1,FLT4,FZD7,FZD8,GAS6,GPER1,HAND2,IGF1,IGF2,IGFBP6,JUN,KDR,MAP2K6,NPY5R,NRXN1,NTRK2,PDGFB,PLA2G2A,PLCB1,PLCG2,RAMP3,ROR2,SEMA3A,TEK,TGFB2,TNFRSF19,WNT5A
GO:BP	regulation of cell death	GO:0010941	FALSE	0.00172909	2.76218	1638	751	96	21128	ACE,ACKR3,ACTC1,ACTN2,ACTN4,ACVR1C,ADCYAP1R1,ADIPOQ,AGTR2,ALDH1A2,AMIGO2,ANGPT1,BDNF,BMP7,BTC,CAMK2A,CARD10,CASP10,CCL21,CCL3,CD248,CD34,CDH5,CIDEA,CIDEC,CNTFR,CSRNP3,CX3CR1,DDAH2,ECSCR,EDNRB,EPHA7,ERBB3,ESR1,FGF10,FGFR2,FHL2,FLT4,FOS,GAS6,GIMAP8,GPAM,GPER1,GPLD1,GRIN2A,HAND2,HBB,HYAL2,IGF1,IL31RA,ISL1,ITGA6,JUN,KCNB1,KDR,KLF4,LIMS2,MAP2K6,MPZ,MYOCD,NAA38,NOS3,NOV,NPY5R,NR4A1,NR4A2,NRBP2,NTRK2,OL…
GO:BP	epithelial cell development	GO:0002064	FALSE	0.00174713	2.75767	215	751	24	21128	ACTA2,ADIPOQ,BMP6,CDH2,CDH5,CLDN5,COL15A1,EDNRB,ESR1,HEG1,KDR,NOTCH4,PDGFB,PECAM1,PGR,PLCB1,PODXL,POF1B,PPP1R16B,RARB,ROBO4,SHROOM3,SOX18,WNT5A
GO:BP	regulation of monoatomic ion transmembrane transporter activity	GO:0032412	FALSE	0.00179278	2.74647	262	751	27	21128	ACTN2,ACTN4,ADRB2,AKAP5,ATP1B2,CASQ2,CLIC2,EHD3,FGF12,FHL1,GEM,GPD1L,GSG1L,KCNIP2,NRXN1,OSR1,PKD2,PLCG2,PLN,RELN,REM1,RYR2,SCN2B,SCN4B,SHANK3,TRPC6,WNK2
GO:BP	negative regulation of vasculature development	GO:1901343	FALSE	0.00180773	2.74287	104	751	16	21128	ANGPTL7,CLDN5,DCN,ECSCR,HHEX,KLF2,KLF4,PPARG,RGCC,SEMA3E,SEMA6A,SERPINF1,TEK,TGFB2,THBS4,TIE1
GO:BP	regulation of animal organ morphogenesis	GO:2000027	FALSE	0.0018717	2.72776	130	751	18	21128	AGTR2,ANKRD6,BMP7,CD34,CTHRC1,DACT1,FGF10,FZD7,GPC3,NKD1,PRICKLE1,ROR2,RSPO2,RSPO3,SFRP1,SIX1,VANGL2,WNT5A
GO:BP	response to transforming growth factor beta	GO:0071559	FALSE	0.001932	2.71399	263	751	27	21128	ACVRL1,ASPN,CAV2,CDH5,CDKN1C,CIDEA,CLDN5,CLEC3B,CTSK,CX3CR1,FGFR2,FOS,HTRA3,HYAL2,IL17RD,ITGB8,JUN,LTBP1,MXRA5,MYOCD,PPARG,RASL11B,SFRP1,SOX6,TGFB2,WNT5A,WWOX
GO:BP	inflammatory response	GO:0006954	FALSE	0.00195955	2.70784	793	751	56	21128	ABCD2,ABI3BP,ACE,ADCY1,ADIPOQ,AFAP1L2,AGTR1,AGTR2,APOD,BCL6B,BMP6,C1QTNF3,C3,CALCRL,CCL21,CCL3,CD96,CDH5,CIITA,CX3CR1,DNASE1L3,EDNRB,ESR1,F8,FABP4,FOS,GPER1,GPRC5B,HYAL2,IGF1,IL16,IL31RA,ISL1,JUN,KLF4,LPL,MGLL,NOV,NPY5R,NR1D2,PLA2G2A,PLCG2,PLP1,PPARG,PTGER4,PTGFR,SCG2,SCN9A,SCNN1B,SELP,SERPINF1,SUCNR1,TEK,TRIL,TSPAN2,WNT5A
GO:BP	cardiac muscle tissue morphogenesis	GO:0055008	FALSE	0.00204308	2.68971	59	751	12	21128	ACTC1,DLL4,DSP,FGFR2,HEG1,ISL1,RYR2,TGFB2,TNNT2,TPM1,TTN,WNT5A
GO:BP	morphogenesis of a branching epithelium	GO:0061138	FALSE	0.00205975	2.68619	187	751	22	21128	AGTR2,BMP7,DLL4,ESR1,FGF10,FGFR2,GPC3,KDR,NOTCH4,NRARP,PGR,PKD2,RASIP1,RSPO2,RSPO3,SEMA3E,SFRP1,SIX1,SLIT2,SOX10,TIE1,WNT5A
GO:BP	morphogenesis of a branching structure	GO:0001763	FALSE	0.00208899	2.68006	202	751	23	21128	AGTR2,BMP7,DLL4,EPHA7,ESR1,FGF10,FGFR2,GPC3,KDR,NOTCH4,NRARP,PGR,PKD2,RASIP1,RSPO2,RSPO3,SEMA3E,SFRP1,SIX1,SLIT2,SOX10,TIE1,WNT5A
GO:BP	actin filament organization	GO:0007015	FALSE	0.00211659	2.67436	452	751	38	21128	ACTC1,ACTN2,ARHGAP28,ARHGEF15,ASAP3,CCL21,COBL,CORO6,CTNNA3,DIAPH3,DSTN,FAM107A,FRMD7,FSCN1,HMCN1,KANK3,KANK4,MYO5B,MYO5C,MYOC,NEBL,PCDH15,POF1B,PPP1R9A,PTGER4,RGCC,RHOBTB1,SFRP1,SHANK3,SHROOM3,SLIT2,SORBS2,SPTBN1,TF,TMOD2,TNNT2,TPM1,TTN
GO:BP	BMP signaling pathway	GO:0030509	FALSE	0.00222443	2.65278	159	751	20	21128	ACVRL1,BMP6,BMP7,CDH5,CHRDL1,CRIM1,GPC3,GREM2,HTRA3,KDR,LEFTY2,PPARG,RBPMS2,SFRP1,SFRP4,SFRP5,SMPD3,TGFB2,TMEM100,WNT5A
GO:BP	regulation of cell adhesion	GO:0030155	FALSE	0.00228791	2.64056	777	751	55	21128	ABI3BP,ACTN4,ACVRL1,ADAM22,ADAMTS18,ADIPOQ,ANGPT1,APOD,BMP6,BMP7,CCL21,CD55,DPP4,DTX1,ECM2,EMCN,EPB41L4B,EPHA3,EPHA7,ERBB3,FAM107A,FBLN1,FBLN2,FUT1,FZD7,GPAM,HLA-DMB,HLA-DOA,IGF1,IGF2,JAG2,KDR,KLF4,LIMS2,MEGF10,MMRN1,MYOC,NOTCH4,NRARP,NUAK1,PDGFB,PODXL,RGCC,SELP,SEMA3E,SEMA6A,SERPINI1,SFRP1,TEK,TGFB2,THY1,TNXB,TPM1,VIT,WNT5A
GO:BP	regulation of epithelial cell apoptotic process	GO:1904035	FALSE	0.00235128	2.6287	106	751	16	21128	ANGPT1,BTC,CD248,CDH5,ECSCR,ESR1,GAS6,GPER1,HAND2,KDR,RAMP2,RGCC,SCG2,SFRP4,TEK,WFS1
GO:BP	positive regulation of macromolecule metabolic process	GO:0010604	FALSE	0.00244498	2.61172	3540	751	176	21128	ACE,ACTA2,ACTC1,ACTG2,ACTN2,ACTN4,ACVR1C,ACVRL1,ADIPOQ,ADRB2,AFAP1L2,AGTR1,AGTR2,AJUBA,ALDH1A2,ANGPT1,ANXA3,APLNR,APOB,BDNF,BMP3,BMP6,BMP7,BTC,C1QTNF3,C3,CARD10,CASP10,CASZ1,CBFA2T3,CCL21,CCL3,CD34,CD55,CDH5,CDKN1C,CIITA,CLDN5,CLEC3B,CNN2,CREB5,CSRNP3,CX3CR1,CYTL1,DACT1,DBP,DCN,DLL4,DTX1,EBF2,EBF3,ECSCR,EDNRB,EGR2,EPB41L4B,EPHA7,ERBB3,ESR1,FAM107A,FBLN1,FGF10,FGF9,FGFR2,FLT1,FLT4,FOS,FZD7,FZD8,GA…
GO:BP	regulation of systemic arterial blood pressure mediated by a chemical signal	GO:0003044	TRUE	0.00254569	2.59419	50	751	11	21128	ACE,ADRA1B,ADRB2,AGTR1,AGTR2,AVPR1A,EDNRB,ENPEP,NOS3,SUCNR1,TPM1
GO:BP	regulation of apoptotic process	GO:0042981	FALSE	0.00261281	2.58289	1454	751	87	21128	ACE,ACKR3,ACTC1,ACTN2,ACTN4,ACVR1C,ADIPOQ,AGTR2,ALDH1A2,AMIGO2,ANGPT1,BDNF,BMP7,BTC,CAMK2A,CARD10,CASP10,CCL21,CCL3,CD248,CDH5,CIDEA,CIDEC,CNTFR,CSRNP3,CX3CR1,DDAH2,ECSCR,EDNRB,EPHA7,ERBB3,ESR1,FGF10,FGFR2,FHL2,FLT4,GAS6,GIMAP8,GPAM,GPER1,GPLD1,GRIN2A,HAND2,HYAL2,IGF1,IL31RA,ISL1,ITGA6,JUN,KCNB1,KDR,KLF4,LIMS2,MAP2K6,MPZ,MYOCD,NAA38,NOS3,NPY5R,NR4A1,NR4A2,NRBP2,NTRK2,OLFM1,OSR1,PPARG,PRKCH,PTGFR,…
GO:BP	digestive tract development	GO:0048565	FALSE	0.00263041	2.57998	133	751	18	21128	ALDH1A2,COBL,DACT1,EDNRB,FGF10,FGF9,FGFR2,MIXL1,MYOCD,PKDCC,RARB,RBPMS2,SFRP1,SFRP5,SOX10,SOX17,TGFB2,WNT5A
GO:BP	regulation of anatomical structure size	GO:0090066	FALSE	0.00264472	2.57762	511	751	41	21128	ACE,ACTA2,ACTN2,ADRA1B,ADRB2,AGTR1,AGTR2,ARHGAP28,AVPR1A,BDNF,CCL21,DSTN,EDNRB,EPHA7,GPER1,GRIP2,HBB,KANK3,KANK4,KCNMB2,KLF2,L1CAM,MYO3A,NOS3,NPR3,OLFM1,SCNN1B,SEMA3A,SEMA3D,SEMA3E,SEMA3G,SEMA5B,SEMA6A,SHANK3,SLC26A5,SLC8A1,SLIT2,SPTBN1,TMOD2,WNT5A,XK
GO:BP	regulation of synapse assembly	GO:0051963	FALSE	0.00267487	2.5727	107	751	16	21128	AMIGO2,BDNF,CBLN1,CLSTN2,COLQ,EPHA7,FLRT2,FLRT3,LRRN1,NEGR1,NRXN1,NTRK2,SIX1,SLITRK1,SLITRK6,WNT5A
GO:BP	regulation of ERK1 and ERK2 cascade	GO:0070372	FALSE	0.00284328	2.54618	301	751	29	21128	ACKR3,ACTA2,ADIPOQ,ANGPT1,CCL21,CCL3,DUSP4,EPHA7,FBLN1,FGF10,FGFR2,FLT4,GAS6,GPER1,HAND2,IGF1,JUN,KDR,LMO3,NPY5R,NRXN1,PDGFB,PLA2G2A,RAMP3,SEMA6A,SPRY3,TEK,TIMP3,WNK2
GO:BP	positive regulation of monoatomic ion transmembrane transport	GO:0034767	FALSE	0.00288007	2.5406	176	751	21	21128	ACTN2,ACTN4,ADCYAP1R1,ADRB2,AKAP5,APLNR,ATP1B2,EHD3,GPER1,KCNH2,KCNIP2,PKD2,PLCG2,PLP1,RAMP3,RELN,RYR2,SHANK3,THY1,TRPC6,WNK2
GO:BP	epithelial cell apoptotic process	GO:1904019	FALSE	0.00293944	2.53174	134	751	18	21128	ANGPT1,BTC,CD248,CDH5,ECSCR,ESR1,GAS6,GPER1,HAND2,JAG2,KDR,RAMP2,RGCC,RYR2,SCG2,SFRP4,TEK,WFS1
GO:BP	cartilage development	GO:0051216	FALSE	0.00294552	2.53084	206	751	23	21128	ACVRL1,ADAMTS7,BMP3,BMP6,BMP7,CTSK,CYTL1,FGF9,GPLD1,HAND2,HOXB3,HYAL2,ITGB8,NOV,OGN,OSR1,OSR2,PKDCC,RARB,RSPO2,SMPD3,SOX6,WNT5A
GO:BP	synapse assembly	GO:0007416	FALSE	0.00295267	2.52978	191	751	22	21128	AMIGO2,BDNF,CBLN1,CDH2,CLSTN2,COLQ,DNER,EPHA7,FLRT2,FLRT3,GPM6A,LGI2,LRRN1,NEGR1,NRXN1,NTRK2,PCDH17,SHANK3,SIX1,SLITRK1,SLITRK6,WNT5A
GO:BP	fat cell differentiation	GO:0045444	FALSE	0.00297418	2.52663	237	751	25	21128	ADIPOQ,ADRB2,ARL4A,BMP7,C1QTNF3,EBF2,EGR2,FABP3,FABP4,FGF10,FNDC5,GPER1,ID4,KLF4,LMO3,LPL,NR4A1,NR4A2,PLCB1,PPARG,SFRP1,SIX1,SLC2A4,TPH1,WNT5A
GO:BP	mesenchymal cell migration	GO:0090497	FALSE	0.00297886	2.52595	61	751	12	21128	BMP7,CDH2,EDNRB,HAND2,ISL1,SEMA3A,SEMA3D,SEMA3E,SEMA3G,SEMA5B,SEMA6A,SOX10
GO:BP	smooth muscle cell differentiation	GO:0051145	FALSE	0.00297886	2.52595	61	751	12	21128	APLNR,EDNRB,FGF10,FGF9,FGFR2,GPER1,HEY1,MYOCD,PDGFB,RAMP2,RBPMS2,SIX1
GO:BP	anatomical structure maturation	GO:0071695	FALSE	0.00301365	2.52091	253	751	26	21128	ACVRL1,ADAMTS7,ALDH1A2,C3,CCL21,CDH5,CDKN1C,CX3CR1,EDNRB,IGF1,KCNB1,KCNIP2,KDR,KLF2,LGI4,LHX6,MYOC,NR4A2,PGR,PPARG,SCARF1,SLC24A4,SOX10,SOX18,TGFB2,WNT5A
GO:BP	regulation of endothelial cell apoptotic process	GO:2000351	FALSE	0.00314235	2.50275	51	751	11	21128	ANGPT1,CD248,CDH5,ECSCR,GAS6,GPER1,KDR,RAMP2,RGCC,SCG2,TEK
GO:BP	regulation of programmed cell death	GO:0043067	FALSE	0.00317676	2.49802	1483	751	88	21128	ACE,ACKR3,ACTC1,ACTN2,ACTN4,ACVR1C,ADIPOQ,AGTR2,ALDH1A2,AMIGO2,ANGPT1,BDNF,BMP7,BTC,CAMK2A,CARD10,CASP10,CCL21,CCL3,CD248,CDH5,CIDEA,CIDEC,CNTFR,CSRNP3,CX3CR1,DDAH2,ECSCR,EDNRB,EPHA7,ERBB3,ESR1,FGF10,FGFR2,FHL2,FLT4,GAS6,GIMAP8,GPAM,GPER1,GPLD1,GRIN2A,HAND2,HYAL2,IGF1,IL31RA,ISL1,ITGA6,JUN,KCNB1,KDR,KLF4,LIMS2,MAP2K6,MPZ,MYOCD,NAA38,NOS3,NPY5R,NR4A1,NR4A2,NRBP2,NTRK2,OLFM1,OSR1,PLCG2,PPARG,PRKCH,…
GO:BP	regulation of inflammatory response	GO:0050727	FALSE	0.00323009	2.49079	371	751	33	21128	ACE,ADIPOQ,AGTR1,BCL6B,C1QTNF3,C3,CALCRL,CCL3,CDH5,DNASE1L3,EDNRB,ESR1,FABP4,GPER1,GPRC5B,HYAL2,IGF1,IL16,ISL1,KLF4,LPL,MGLL,NOV,NPY5R,NR1D2,PLA2G2A,PLCG2,PPARG,PTGER4,SERPINF1,SUCNR1,TEK,WNT5A
GO:BP	neural crest cell differentiation	GO:0014033	FALSE	0.00325067	2.48803	96	751	15	21128	ALDH1A2,BMP7,CDH2,EDNRB,HAND2,ISL1,SEMA3A,SEMA3D,SEMA3E,SEMA3G,SEMA5B,SEMA6A,SFRP1,SIX1,SOX10
GO:BP	cell growth	GO:0016049	FALSE	0.00330612	2.48068	497	751	40	21128	ACVRL1,AGTR1,AGTR2,AVPR1A,BDNF,COBL,CRIM1,DCLK1,EPHA7,FAM107A,FHL1,FLRT3,HBEGF,HYAL2,IGF1,IGFBPL1,KAZALD1,KIF26A,L1CAM,LGI1,MYOCD,N6AMT1,NOV,NRN1,OLFM1,PI16,PPARG,SEMA3A,SEMA3D,SEMA3E,SEMA3G,SEMA5B,SEMA6A,SFRP1,SLIT2,SORBS2,SOX17,SYT17,TGFB2,WNT5A
GO:BP	sensory system development	GO:0048880	FALSE	0.00359235	2.44462	408	751	35	21128	ACVRL1,ADAMTS18,ALDH1A2,ANGPTL7,ARHGEF15,BMP6,BMP7,C3,CDKN1C,CHRDL1,DCLK1,DLL4,FGF10,FGF9,FLT1,GPM6A,IMPG2,ISL1,JUN,KDR,KLF4,MFAP5,NKD1,NTRK2,OSR2,PROM1,RARB,SEMA3A,SERPINF1,SLITRK6,TGFB2,THRB,THY1,TSPAN12,WNT5A
GO:BP	regulation of chemotaxis	GO:0050920	FALSE	0.00365728	2.43684	224	751	24	21128	CCL21,CCL3,CX3CR1,CXCL14,DPP4,FGF10,GAS6,IL16,KDR,MMP28,NOV,NOVA2,PDGFB,SCG2,SEMA3A,SEMA3D,SEMA3E,SEMA3G,SEMA5B,SEMA6A,SLIT2,SUCNR1,THBS4,WNT5A
GO:BP	response to organic cyclic compound	GO:0014070	FALSE	0.00386911	2.41239	933	751	62	21128	ABCA3,ACACB,ACE,ADCY1,ADCYAP1R1,ADIPOQ,ALDH1A2,ALPL,ANXA3,APOB,AVPR1A,BCHE,BMP6,BMP7,CASQ2,CAV2,CCL3,CIDEA,CIITA,CKB,CTSK,EDNRB,ESR1,FAM107A,FGF10,FOS,GABRB1,GPD1,GPER1,GPLD1,HAND2,ISL1,KLF2,LBH,LCAT,LMO3,MGARP,MN1,NSG1,PALM,PDGFB,PGR,PKD2,PLCB1,PPARG,PPP1R1B,PRKAR2B,PTGFR,RAMP3,RXRG,RYR2,RYR3,SCNN1B,SERPINF1,SFRP1,SIX1,SLC26A5,SLC8A1,SLIT2,SOX10,TGFB2,ZNF366
GO:BP	cardiac muscle cell differentiation	GO:0055007	FALSE	0.00390056	2.40887	110	751	16	21128	ACTC1,ACTN2,ASB2,FHL2,FZD7,IGF1,ISL1,MYOCD,NEBL,PI16,RARB,SGCD,SLC8A1,SORBS2,SOX6,TTN
GO:BP	cellular response to transforming growth factor beta stimulus	GO:0071560	FALSE	0.00404891	2.39266	257	751	26	21128	ACVRL1,ASPN,CAV2,CDH5,CDKN1C,CIDEA,CLDN5,CLEC3B,CTSK,CX3CR1,FGFR2,FOS,HTRA3,HYAL2,IL17RD,ITGB8,JUN,LTBP1,MYOCD,PPARG,RASL11B,SFRP1,SOX6,TGFB2,WNT5A,WWOX
GO:BP	regulation of muscle cell differentiation	GO:0051147	FALSE	0.00407409	2.38997	137	751	18	21128	BDNF,DMPK,FGF9,FGFR2,FZD7,GPER1,IGF1,IGF2,MEGF10,MYOCD,NOV,PDGFB,PI16,RBM24,RBM38,RBPMS2,SOX6,TMEM119
GO:BP	multicellular organismal homeostasis	GO:0048871	FALSE	0.00444756	2.35188	754	751	53	21128	ABCA3,ACACB,ACOT11,ADIPOQ,ADRB2,ALDH1A1,ALPL,ANGPT1,ATP1B2,AZGP1,BMP6,CD34,CDH2,CDH23,CDH5,CIDEA,CLDN5,CRISPLD1,CTSK,CX3CR1,CYTL1,EBF2,EDNRB,EMCN,FABP4,GATM,GPAM,HYAL2,IRF4,KDR,KLF2,LDB2,MAP2K6,MPL,MRAP2,MYCT1,MYO5B,NOS3,NOV,NOVA2,NPR3,NR1D2,PCDH15,PECAM1,PLA2G2A,PM20D1,PROM1,SCD,SCNN1B,ST6GALNAC1,TF,TMEM119,WFS1
GO:BP	regulation of cell projection organization	GO:0031344	FALSE	0.00457058	2.34003	656	751	48	21128	ATP1B2,BDNF,BMP7,CCL21,CDH2,CHODL,COBL,DGKG,EPHA3,EPHA7,FRMD7,FSCN1,GPM6A,GRIP1,ITGA6,KLF4,L1CAM,MGARP,MYO3A,NEGR1,NGEF,NOVA2,NRXN1,NTRK2,PALM,PODXL,POU3F2,PPP1R16B,RELN,ROR2,SCARF1,SEMA3A,SEMA3D,SEMA3E,SEMA3G,SEMA5B,SEMA6A,SERPINF1,SERPINI1,SFRP1,SHANK3,SLIT2,SLITRK1,SPRY3,STMN2,THY1,WNT5A,XK
GO:BP	phosphate-containing compound metabolic process	GO:0006796	FALSE	0.00462172	2.3352	2843	751	146	21128	ABCA3,ABCA8,ACACB,ACE,ACOT11,ACVR1C,ACVRL1,ADCY1,ADCY4,ADCYAP1R1,ADIPOQ,ADRB2,AFAP1L2,AGTR2,AJUBA,AK5,ALPL,ANGPT1,APLNR,BDNF,BMP3,BMP6,BMP7,BTC,C3,CAMK2A,CARD10,CBFA2T3,CCL21,CDH5,CDKN1C,CIITA,CKB,CX3CR1,DBNDD1,DCLK1,DGKG,DGKI,DMPK,DPM3,DUSP28,DUSP4,EDNRB,ELOVL7,ENTPD1,ENTPD3,EPHA3,EPHA5,EPHA7,EPHB4,ERBB3,FABP3,FABP4,FBLN1,FGF10,FGF9,FGFR2,FLT1,FLT4,FZD7,FZD8,GAS6,GFRA1,GIMAP7,GPAM,GPD1,GPD1L,GPE…
GO:BP	negative regulation of blood vessel endothelial cell migration	GO:0043537	FALSE	0.00463012	2.33441	34	751	9	21128	ACVRL1,AGTR2,CARD10,DLL4,KLF4,MEOX2,MMRN2,PPARG,RGCC
GO:BP	regulation of non-canonical Wnt signaling pathway	GO:2000050	FALSE	0.00493546	2.30667	26	751	8	21128	ANKRD6,DACT1,GPC3,NKD1,RSPO3,SFRP1,SFRP4,WNT5A
GO:BP	tissue remodeling	GO:0048771	FALSE	0.00531631	2.27439	168	751	20	21128	ABI3BP,ACE,ACVRL1,ADRB2,AGTR2,CTHRC1,CTSK,DLL4,FGF10,FLT4,HAND2,NOS3,PPARG,RSPO3,SFRP1,TF,THBS4,TIE1,TMEM119,TPH1
GO:BP	cardiac ventricle development	GO:0003231	FALSE	0.00541886	2.26609	126	751	17	21128	APLNR,DLL4,DSP,FGFR2,HAND2,HEG1,HEY1,ISL1,MYOCD,NOS3,NPY5R,RYR2,SLIT2,TGFB2,TNNT2,TPM1,WNT5A
GO:BP	calcium-dependent cell-cell adhesion via plasma membrane cell adhesion molecules	GO:0016339	TRUE	0.00571621	2.24289	44	751	10	21128	AJUBA,ARVCF,CDH2,CDH23,CDH5,CDH8,NRXN1,PCDH12,SELL,SELP
GO:BP	cell migration involved in sprouting angiogenesis	GO:0002042	FALSE	0.0057314	2.24174	54	751	11	21128	CARD10,CLEC14A,DLL4,EPHB4,GPLD1,KDR,KLF4,MEOX2,MMRN2,NR4A1,SLIT2
GO:BP	leukocyte migration	GO:0050900	FALSE	0.00585979	2.23212	399	751	34	21128	APOD,ASB2,CCL21,CCL3,CD34,CH25H,CNN2,CX3CR1,CXCL14,DPP4,EDNRB,FLT1,GAS6,IL16,ITGA6,MMP28,NOV,PDGFB,PECAM1,PLCB1,PLVAP,PODXL2,PTGER4,ROR2,SCG2,SELL,SELP,SLIT2,SMPD3,TGFB2,THBS4,THY1,WNT5A,XG
GO:BP	actomyosin structure organization	GO:0031032	FALSE	0.00587669	2.23087	199	751	22	21128	ACTC1,ACTN2,ARHGAP28,ARHGEF15,ASAP3,CNN1,CNN2,CSRP1,EPB41L4B,FRMD7,LDB3,MYH10,MYOC,NEBL,PGM5,PTGER4,RGCC,SFRP1,TMOD2,TNNT2,TPM1,TTN
GO:BP	inorganic ion homeostasis	GO:0098771	FALSE	0.00634532	2.19755	548	751	42	21128	ACE,AGTR1,ALPL,APLNR,ATP1B2,AVPR1A,BMP6,CASQ2,CAV2,CCL21,CCL3,CDH23,CDH5,CKB,CLIC2,DMPK,EDNRB,GPER1,GRIA1,HYAL2,KCNH2,KDR,KLHL3,PKD2,PLCG2,PLN,PRND,RYR2,RYR3,SCARA5,SCN7A,SCNN1B,SFRP4,SGCD,SLC24A4,SLC8A1,TF,THY1,TRPC6,WFS1,WNT5A,XK
GO:BP	muscle organ morphogenesis	GO:0048644	FALSE	0.0066734	2.17565	77	751	13	21128	ACTC1,DLL4,DSP,FGFR2,HEG1,ISL1,RYR2,TCF15,TGFB2,TNNT2,TPM1,TTN,WNT5A
GO:BP	outflow tract morphogenesis	GO:0003151	FALSE	0.0066734	2.17565	77	751	13	21128	BMP7,CLDN5,FGFR2,HAND2,ISL1,JUN,NPY1R,NPY5R,SIX1,SOX17,SOX18,TGFB2,WNT5A
GO:BP	regulation of calcium ion transport	GO:0051924	FALSE	0.00667665	2.17544	264	751	26	21128	ACE,ADCYAP1R1,AKAP5,APLNR,CAMK2A,CASQ2,CCL3,CLIC2,EHD3,GEM,GPER1,IL16,NOS3,PDGFB,PKD2,PLCG2,PLN,PLP1,RAMP3,REM1,RYR2,SLC8A1,THY1,TRPC6,TSPAN13,WFS1
GO:BP	branching morphogenesis of an epithelial tube	GO:0048754	FALSE	0.00672679	2.17219	156	751	19	21128	AGTR2,BMP7,DLL4,ESR1,FGF10,FGFR2,GPC3,KDR,NOTCH4,NRARP,PGR,PKD2,RASIP1,RSPO2,SEMA3E,SIX1,SLIT2,TIE1,WNT5A
GO:BP	regulation of cardiocyte differentiation	GO:1905207	FALSE	0.00679572	2.16776	27	751	8	21128	ABI3BP,FZD7,GPER1,MYOCD,PRICKLE1,SOX17,SOX6,TGFB2
GO:BP	synapse organization	GO:0050808	FALSE	0.00686718	2.16322	438	751	36	21128	AMIGO2,ARHGEF15,BDNF,C1QL3,C3,CBLN1,CDH2,CDH8,CHRDL1,CLSTN2,COLQ,CX3CR1,DMPK,DNER,DRP2,EPHA7,FLRT2,FLRT3,GPM6A,L1CAM,LGI2,LRRN1,MYOT,NEGR1,NGEF,NRXN1,NTRK2,PALM,PCDH17,RELN,SEMA3E,SHANK3,SIX1,SLITRK1,SLITRK6,WNT5A
GO:BP	negative regulation of angiogenesis	GO:0016525	FALSE	0.00711467	2.14785	102	751	15	21128	CLDN5,DCN,ECSCR,HHEX,KLF2,KLF4,PPARG,RGCC,SEMA3E,SEMA6A,SERPINF1,TEK,TGFB2,THBS4,TIE1
GO:BP	positive regulation of canonical Wnt signaling pathway	GO:0090263	FALSE	0.00711467	2.14785	102	751	15	21128	DACT1,DKK2,FGF10,FGF9,FGFR2,GPC3,GPRC5B,HHEX,LGR5,NRARP,RSPO2,RSPO3,SFRP1,SFRP4,WNK2
GO:BP	response to abiotic stimulus	GO:0009628	FALSE	0.00712613	2.14715	1141	751	71	21128	ACE,ACOT11,ACTN4,ACVRL1,ADIPOQ,ADRB2,AJUBA,AVPR1A,BMP6,BMP7,CBFA2T3,CD34,CDH2,CDH8,CIDEA,CIITA,CNN2,COX1,CRIP1,CYGB,DNAJB4,DPP4,EFHD1,FBXL22,FOS,GPLD1,GRIN2A,GUCY1A2,HYAL2,IGF1,JUN,KCND2,KCNJ3,LPL,MGARP,MPL,MYOCD,NOS3,NR4A1,NR4A2,NRXN1,PALM,PCDH15,PER3,PIEZO2,PKD2,PLIN1,PPARG,PPP1R1B,PTGER4,PTPRQ,RGCC,RYR2,SCARA5,SCN2B,SCN9A,SCNN1B,SEMA5B,SERPINF1,SFRP1,SLC24A4,SLC26A5,SLC2A4,SLC52A3,SLC8A1,SLITR…
GO:BP	regulation of muscle system process	GO:0090257	FALSE	0.00733298	2.13472	233	751	24	21128	ADRA1B,ADRB2,CALCRL,CASQ2,CLIC2,CNN1,CTNNA3,DMPK,DSG2,DSP,EHD3,GPER1,HAND2,IGF1,MYOCD,NOS3,NR4A1,PI16,PLN,PPARG,RYR2,SLC8A1,TNNT2,TPM1
GO:BP	phosphorus metabolic process	GO:0006793	FALSE	0.00752207	2.12366	2868	751	146	21128	ABCA3,ABCA8,ACACB,ACE,ACOT11,ACVR1C,ACVRL1,ADCY1,ADCY4,ADCYAP1R1,ADIPOQ,ADRB2,AFAP1L2,AGTR2,AJUBA,AK5,ALPL,ANGPT1,APLNR,BDNF,BMP3,BMP6,BMP7,BTC,C3,CAMK2A,CARD10,CBFA2T3,CCL21,CDH5,CDKN1C,CIITA,CKB,CX3CR1,DBNDD1,DCLK1,DGKG,DGKI,DMPK,DPM3,DUSP28,DUSP4,EDNRB,ELOVL7,ENTPD1,ENTPD3,EPHA3,EPHA5,EPHA7,EPHB4,ERBB3,FABP3,FABP4,FBLN1,FGF10,FGF9,FGFR2,FLT1,FLT4,FZD7,FZD8,GAS6,GFRA1,GIMAP7,GPAM,GPD1,GPD1L,GPE…
GO:BP	gliogenesis	GO:0042063	FALSE	0.00753992	2.12263	316	751	29	21128	ADAM22,ASPA,ATP1B2,CCL3,CDH2,CX3CR1,DNER,DTX1,EGR2,ERBB3,FGF10,ID4,ITGB4,LGI4,MYOC,NTRK2,PHGDH,PLP1,POU3F2,PPARG,PRKCH,PTPRB,RELN,ROR2,SHANK3,SOX10,SOX6,TGFB2,TSPAN2
GO:BP	regulation of actin filament-based process	GO:0032970	FALSE	0.00770494	2.11323	404	751	34	21128	ACTA2,ACTN2,ARHGAP28,ARHGEF15,ASAP3,CCL21,CNN2,CTNNA3,DSG2,DSP,DSTN,EPHA3,EPHA5,FAM107A,FRMD7,FSCN1,KANK3,KANK4,MYO3A,MYOC,PLN,PTGER4,RGCC,RHOBTB1,RYR2,SEMA3E,SFRP1,SHANK3,SLIT2,SPTBN1,TEK,TMOD2,TNNT2,TPM1
GO:BP	positive regulation of nervous system development	GO:0051962	FALSE	0.00790907	2.10187	283	751	27	21128	ACE,AMIGO2,ASPA,BDNF,CBLN1,CHODL,CLSTN2,CX3CR1,EGR2,FLRT2,FLRT3,GPER1,ID4,L1CAM,LRRN1,NRXN1,NTRK2,PPARG,PRKCH,RASSF10,RELN,SERPINF1,SHANK3,SLIT2,SLITRK1,SLITRK6,SOX10
GO:BP	export from cell	GO:0140352	FALSE	0.00793457	2.10048	871	751	58	21128	ABCA3,ABCG2,ACVR1C,ADCY1,ADIPOQ,AGTR1,ANXA3,ATP1B2,AVPR1A,BMP6,C1QTNF3,CAMK2A,CBLN1,CCL3,DGKI,DOC2B,EDNRB,EPHA5,EXOC3L2,FGF10,GPER1,GPLD1,ICA1,IGF1,ISL1,KCNB1,KCNH2,KCNIP2,KCNK5,MAP2K6,MCTP1,MTTP,MYH10,MYOM1,MYRIP,NOV,NPY5R,NR4A1,NRXN1,NTRK2,OXCT1,PPARG,PRRT2,PRSS12,RAB3C,RGCC,RIMS4,SCG2,SFRP1,SLC24A4,SLC8A1,SMPD3,STXBP6,SUCNR1,SYT17,TGFB2,TPH1,TTN
GO:BP	negative regulation of blood vessel morphogenesis	GO:2000181	FALSE	0.00805791	2.09378	103	751	15	21128	CLDN5,DCN,ECSCR,HHEX,KLF2,KLF4,PPARG,RGCC,SEMA3E,SEMA6A,SERPINF1,TEK,TGFB2,THBS4,TIE1
GO:BP	endothelial cell apoptotic process	GO:0072577	FALSE	0.00835707	2.07795	56	751	11	21128	ANGPT1,CD248,CDH5,ECSCR,GAS6,GPER1,KDR,RAMP2,RGCC,SCG2,TEK
GO:BP	cell death	GO:0008219	FALSE	0.00837074	2.07724	2113	751	114	21128	ACE,ACKR3,ACTC1,ACTN2,ACTN4,ACVR1C,ADCYAP1R1,ADIPOQ,AGTR2,ALDH1A2,AMIGO2,ANGPT1,BDNF,BMP7,BTC,CAMK2A,CARD10,CASP10,CCL21,CCL3,CD248,CD34,CDH5,CIDEA,CIDEC,CNTFR,CRIP1,CSRNP3,CX3CR1,DAPL1,DDAH2,DMPK,DNASE1L3,ECSCR,EDNRB,EMP1,EPHA7,ERBB3,ESR1,FGF10,FGFR2,FHL2,FLT4,FOS,GAS6,GIMAP8,GPAM,GPER1,GPLD1,GRIN2A,HAND2,HBB,HYAL2,IFI27,IGF1,IL31RA,ISL1,ITGA6,JAG2,JUN,KCNB1,KDR,KLF4,LIMS2,MAP2K6,MEGF10,MPZ,MYOC…
GO:BP	negative regulation of epithelial cell migration	GO:0010633	FALSE	0.00843623	2.07385	67	751	12	21128	ACVRL1,AGTR2,CARD10,DCN,DLL4,KLF4,MEOX2,MMRN2,PPARG,RGCC,SERPINF1,SLIT2
GO:BP	pattern specification process	GO:0007389	FALSE	0.00848656	2.07127	479	751	38	21128	ACVRL1,ALDH1A2,APLNR,ASB2,BMP7,C3,CHRDL1,COBL,DLL4,DSCAML1,EGR2,FGF10,FGFR2,GPC3,GREM2,HAND2,HEY1,HHEX,HOXB3,HOXD8,ISL1,MDFI,MEOX1,MEOX2,NKD1,NRARP,OSR1,PKD2,RELN,SFRP1,SHROOM3,SIX1,SOX17,SOX18,TCF15,TLL1,VANGL2,WNT5A
GO:BP	response to inorganic substance	GO:0010035	FALSE	0.00872323	2.05932	555	751	42	21128	ADCY1,ALPL,APOB,ASPN,AVPR1A,BMP6,BMP7,CASQ2,COX1,CPNE4,CRIP1,EDNRB,FABP4,FOS,GPLD1,GRIA1,HBB,JUN,KCNB1,KCNIP2,KCNMB2,KDR,KLF2,LCAT,MTTP,NOS3,NRXN1,PKD2,PLCB1,PLCG2,RYR2,RYR3,SERPINF1,SLC26A5,SLC8A1,SMPD3,SUCNR1,SYT17,TF,TNNT2,TTN,WNT5A
GO:BP	cellular response to oxygen-containing compound	GO:1901701	FALSE	0.00879221	2.0559	1191	751	73	21128	ACE,ACTN2,ADCY1,ADIPOQ,ADRB2,AGTR1,AGTR2,ALDH1A1,ALDH1A2,AVPR1A,BMP6,BMP7,BRINP3,CALCRL,CAMK2A,CAV2,CCL3,CD55,CKB,CX3CR1,EDNRB,EPHA3,EPHA5,ESR1,FGFR2,FOS,FZD7,GAS6,GPD1,GPER1,GPLD1,HAND2,IGF1,IGF2,JUN,KCNB1,KLF2,LDOC1,LPL,MAP2K6,MGARP,MN1,NOS3,NR4A1,NR4A2,NSG1,NTRK2,OSR1,OXCT1,PALM,PDGFB,PKD2,PLCB1,PLCG2,PPARG,PPP1R1B,PTGER4,PTGFR,RAMP3,RYR2,RYR3,SCNN1B,SERPINF1,SFRP1,SIX1,SLC2A4,SLC8A1,SLIT2,SMP…
GO:BP	negative regulation of cellular response to growth factor stimulus	GO:0090288	FALSE	0.00911132	2.04042	104	751	15	21128	AGTR2,CHRDL1,CRIM1,DCN,GREM2,HHEX,HTRA3,MMRN2,PPARG,RBPMS2,SEMA6A,SFRP1,SLIT2,SPRY3,WNT5A
GO:BP	embryonic organ morphogenesis	GO:0048562	FALSE	0.00911645	2.04017	302	751	28	21128	APLNR,ASB2,BMP7,CDH23,CTHRC1,DSCAML1,FGF10,FGF9,FGFR2,HAND2,HOXB3,MDFI,MFAP5,MYO3A,OSR1,OSR2,PCDH15,PKD2,PTPRQ,RARB,RBPMS2,RYR2,SIX1,SLITRK6,SOX17,SOX18,VANGL2,WNT5A
GO:BP	monoatomic ion homeostasis	GO:0050801	FALSE	0.00916516	2.03786	614	751	45	21128	ACE,AGTR1,ALPL,APLNR,ATP1B2,ATP6V0E2,AVPR1A,BMP6,CASQ2,CAV2,CCL21,CCL3,CDH23,CDH5,CKB,CLIC2,DMPK,EDNRB,GPER1,GRIA1,HYAL2,KCNH2,KDR,KLHL3,PKD2,PLCG2,PLN,PRND,RYR2,RYR3,SCARA5,SCN7A,SCNN1B,SGCD,SLC24A4,SLC26A4,SLC8A1,TF,THY1,TMEM175,TRPC6,WFS1,WNK2,WNT5A,XK
GO:BP	glomerulus vasculature development	GO:0072012	FALSE	0.00921865	2.03533	28	751	8	21128	ACTA2,ANGPT1,BMP7,CD34,OSR1,PDGFB,PECAM1,TEK
GO:BP	supramolecular fiber organization	GO:0097435	FALSE	0.00931601	2.03077	814	751	55	21128	ACTC1,ACTN2,ADAMTS7,ARHGAP28,ARHGEF15,ASAP3,CCL21,CDH5,COBL,COL12A1,COLGALT2,CORO6,CSRP1,CTNNA3,DES,DIAPH3,DPT,DSP,DSTN,FAM107A,FRMD7,FSCN1,HMCN1,KANK3,KANK4,LDB3,MFAP5,MYO5B,MYO5C,MYOC,NCKAP5,NEBL,PCDH15,PGM5,POF1B,PPP1R9A,PTGER4,PTPRQ,RGCC,RHOBTB1,SFRP1,SHANK3,SHROOM3,SLIT2,SORBS2,SPTBN1,STMN2,TF,TGFB2,TLL1,TMOD2,TNNT2,TNXB,TPM1,TTN
GO:BP	brain development	GO:0007420	FALSE	0.009795	2.009	795	751	54	21128	ACE,ADCY1,AGTR2,ALDH1A2,AMIGO2,ANXA3,APOD,ATP1B2,AVPR1A,BMP7,CBLN1,CCDC141,CDH2,CKB,CNTN4,COX1,CX3CR1,DCLK1,DSCAML1,EGR2,EPHA5,EPHA7,FGF10,FGF9,FGFR2,FUT1,GNB4,GRIN2A,HOXB3,ID4,ISL1,LHX6,MGARP,NEGR1,NR4A2,NRXN1,NTRK2,OXCT1,PCDH19,PHGDH,PLCB1,PLP1,POU3F2,RARB,RELN,SEMA3A,SEMA3E,SFRP1,SHANK3,SLC8A1,SLIT2,SOX6,TSPAN2,WNT5A
GO:BP	cell-matrix adhesion	GO:0007160	FALSE	0.0106072	1.9744	238	751	24	21128	ACTN2,ACVRL1,AJUBA,APOD,CCL21,CD34,CD96,ECM2,EPHA3,FAM107A,FREM1,FUT1,ITGA6,ITGB4,ITGB8,KDR,L1CAM,MYOC,SEMA3E,SFRP1,TEK,THSD1,THY1,TNXB
GO:BP	cellular response to hormone stimulus	GO:0032870	FALSE	0.01061	1.97428	598	751	44	21128	ACE,ACTN2,ADIPOQ,AGTR1,AGTR2,APOB,BMP7,CAMK2A,CAV2,CKB,ESR1,FAM107A,FOS,GPER1,GPLD1,IGF2,ISL1,LBH,LMO3,LPL,MGARP,NR1D2,NR4A1,NR4A2,NR5A2,PGR,PLCB1,PPARG,PTGER4,PTGFR,RAMP1,RAMP2,RAMP3,RARB,RXRG,SCNN1B,SERPINF1,SFRP1,SLC2A4,SLIT2,SOX10,TBC1D4,THRB,ZNF366
GO:BP	positive regulation of peptidyl-tyrosine phosphorylation	GO:0050731	FALSE	0.0107726	1.96768	191	751	21	21128	ACE,ADIPOQ,AFAP1L2,ANGPT1,BMP6,BTC,ERBB3,FGF10,GAS6,GFRA1,GPRC5B,HBEGF,IGF1,IGF2,IL31RA,ISL1,PDGFB,PECAM1,PLCG2,RELN,THBS4
GO:BP	phosphatidylinositol-mediated signaling	GO:0048015	FALSE	0.0109219	1.9617	176	751	20	21128	ANGPT1,DCN,ERBB3,FLT1,GPER1,IGF1,KDR,MYOC,NPR3,NTRK2,PDGFB,PLCB1,PLCB4,PPP1R16B,RELN,ROR2,SELP,SEMA3E,TEK,TGFB2
GO:BP	regulation of cell growth	GO:0001558	FALSE	0.0110759	1.95562	429	751	35	21128	ACVRL1,AGTR1,AGTR2,AVPR1A,BDNF,CRIM1,EPHA7,FAM107A,FHL1,HBEGF,HYAL2,IGF1,IGFBPL1,KAZALD1,KIF26A,L1CAM,LGI1,MYOCD,N6AMT1,NOV,OLFM1,PI16,PPARG,SEMA3A,SEMA3D,SEMA3E,SEMA3G,SEMA5B,SEMA6A,SFRP1,SLIT2,SOX17,SYT17,TGFB2,WNT5A
GO:BP	regulation of neurogenesis	GO:0050767	FALSE	0.0111645	1.95216	375	751	32	21128	ACE,ASPA,BDNF,BMP7,CHODL,CX3CR1,DLL4,EGR2,EPHA7,GPER1,HEY1,HOXB3,ID4,L1CAM,NTRK2,PPARG,PRKCH,RASSF10,RELN,SEMA3A,SEMA3D,SEMA3E,SEMA3G,SEMA5B,SEMA6A,SERPINF1,SHANK3,SLIT2,SLITRK1,SOX10,THY1,WNT5A
GO:BP	apoptotic process	GO:0006915	FALSE	0.0111741	1.95179	1894	751	104	21128	ACE,ACKR3,ACTC1,ACTN2,ACTN4,ACVR1C,ADIPOQ,AGTR2,ALDH1A2,AMIGO2,ANGPT1,BDNF,BMP7,BTC,CAMK2A,CARD10,CASP10,CCL21,CCL3,CD248,CDH5,CIDEA,CIDEC,CNTFR,CRIP1,CSRNP3,CX3CR1,DAPL1,DDAH2,DMPK,DNASE1L3,ECSCR,EDNRB,EPHA7,ERBB3,ESR1,FGF10,FGFR2,FHL2,FLT4,GAS6,GIMAP8,GPAM,GPER1,GPLD1,GRIN2A,HAND2,HYAL2,IFI27,IGF1,IL31RA,ISL1,ITGA6,JAG2,JUN,KCNB1,KDR,KLF4,LIMS2,MAP2K6,MEGF10,MPZ,MYOCD,NAA38,NOS3,NPY5R,NR4A1,NR4…
GO:BP	negative regulation of molecular function	GO:0044092	FALSE	0.011914	1.92394	1115	751	69	21128	ACACB,ACE,ACTN2,ADIPOQ,ADRB2,AGTR2,AJUBA,AKAP5,ANXA3,ARHGAP28,BMP7,C3,CAMK2A,CASQ2,CDKN1C,CLIC2,COL28A1,CRIM1,DACT1,DBNDD1,DGKI,DKK2,EDNRB,ESR1,FABP4,FRMD7,GAS6,GEM,GPC3,HAND2,HEG1,HEY1,HHEX,HYAL2,ITIH5,JUN,KLF4,MDFI,MYOCD,NOS3,NPR3,NR4A1,OSR1,PALM,PDGFB,PI16,PKD2,PLN,PPARG,PPP1R1A,PPP1R1B,PRKAR2B,PTPRB,RAMP3,RASIP1,REM1,SERPINF1,SERPINI1,SFRP1,SFRP4,SFRP5,SLC8A1,SLIT2,SPRY3,TGFB2,THY1,TIMP3,TNNT…
GO:BP	regulation of plasma membrane bounded cell projection organization	GO:0120035	FALSE	0.0119737	1.92177	640	751	46	21128	ATP1B2,BDNF,BMP7,CCL21,CDH2,CHODL,COBL,DGKG,EPHA3,EPHA7,FRMD7,FSCN1,GPM6A,ITGA6,KLF4,L1CAM,MGARP,MYO3A,NEGR1,NGEF,NOVA2,NRXN1,NTRK2,PALM,PODXL,POU3F2,PPP1R16B,RELN,ROR2,SCARF1,SEMA3A,SEMA3D,SEMA3E,SEMA3G,SEMA5B,SEMA6A,SERPINF1,SERPINI1,SFRP1,SHANK3,SLIT2,SLITRK1,STMN2,THY1,WNT5A,XK
GO:BP	prostate gland morphogenesis	GO:0060512	TRUE	0.0123355	1.90884	29	751	8	21128	BMP7,CRIP1,ESR1,FGF10,FGFR2,ID4,SFRP1,WNT5A
GO:BP	metal ion homeostasis	GO:0055065	FALSE	0.013187	1.87985	526	751	40	21128	ACE,AGTR1,ALPL,APLNR,ATP1B2,AVPR1A,BMP6,CASQ2,CAV2,CCL21,CCL3,CDH23,CDH5,CLIC2,DMPK,EDNRB,GPER1,GRIA1,HYAL2,KCNH2,KDR,KLHL3,PKD2,PLCG2,PLN,PRND,RYR2,RYR3,SCARA5,SCN7A,SCNN1B,SGCD,SLC24A4,SLC8A1,TF,THY1,TRPC6,WFS1,WNT5A,XK
GO:BP	endocardial cushion development	GO:0003197	FALSE	0.0132515	1.87774	48	751	10	21128	ACVRL1,APLNR,BMP7,ERBB3,HEY1,ISL1,NOS3,RBM24,TGFB2,TMEM100
GO:BP	cardiac ventricle morphogenesis	GO:0003208	FALSE	0.0135759	1.86723	70	751	12	21128	DLL4,DSP,FGFR2,HAND2,HEG1,HEY1,ISL1,NPY5R,RYR2,TGFB2,TNNT2,TPM1
GO:BP	muscle tissue morphogenesis	GO:0060415	FALSE	0.0135759	1.86723	70	751	12	21128	ACTC1,DLL4,DSP,FGFR2,HEG1,ISL1,RYR2,TGFB2,TNNT2,TPM1,TTN,WNT5A
GO:BP	kidney epithelium development	GO:0072073	FALSE	0.013686	1.86372	149	751	18	21128	ADIPOQ,AGTR2,BMP7,CD34,EDNRB,EPHA7,FGFR2,GPC3,KLHL3,OSR1,PECAM1,PKD2,PODXL,PROM1,RARB,SFRP1,SIX1,SLIT2
GO:BP	neural crest cell migration	GO:0001755	FALSE	0.014256	1.846	59	751	11	21128	BMP7,EDNRB,HAND2,ISL1,SEMA3A,SEMA3D,SEMA3E,SEMA3G,SEMA5B,SEMA6A,SOX10
GO:BP	regionalization	GO:0003002	FALSE	0.0142835	1.84517	434	751	35	21128	ACVRL1,ALDH1A2,APLNR,ASB2,C3,COBL,DLL4,DSCAML1,EGR2,FGF10,FGFR2,GPC3,GREM2,HAND2,HEY1,HHEX,HOXB3,HOXD8,ISL1,MDFI,MEOX1,MEOX2,NKD1,NRARP,OSR1,PKD2,RELN,SFRP1,SIX1,SOX17,SOX18,TCF15,TLL1,VANGL2,WNT5A
GO:BP	inositol lipid-mediated signaling	GO:0048017	FALSE	0.0153815	1.813	180	751	20	21128	ANGPT1,DCN,ERBB3,FLT1,GPER1,IGF1,KDR,MYOC,NPR3,NTRK2,PDGFB,PLCB1,PLCB4,PPP1R16B,RELN,ROR2,SELP,SEMA3E,TEK,TGFB2
GO:BP	negative regulation of response to external stimulus	GO:0032102	FALSE	0.0154624	1.81072	399	751	33	21128	ADAMTS18,ADIPOQ,C1QTNF3,CALCRL,CD34,CD96,CDH5,DPP4,GPER1,IGF1,ISL1,KLF4,MMP28,MMRN1,NOS3,NOV,NPY5R,NR1D2,NRXN1,PDGFB,PPARG,PTGER4,SEMA3A,SEMA3D,SEMA3E,SEMA3G,SEMA5B,SEMA6A,SERPINF1,SLIT2,TEK,TSPAN8,WNT5A
GO:BP	regulation of ossification	GO:0030278	FALSE	0.0154852	1.81008	122	751	16	21128	ADRB2,BMP6,BMP7,CCL3,EGR2,OMD,OSR1,OSR2,PKDCC,PTGER4,SFRP1,SLC8A1,TGFB2,TMEM119,TPH1,WNT5A
GO:BP	regulation of peptidyl-tyrosine phosphorylation	GO:0050730	FALSE	0.0157365	1.80309	260	751	25	21128	ACE,ADIPOQ,AFAP1L2,ANGPT1,BMP6,BTC,EPHA7,ERBB3,FGF10,GAS6,GFRA1,GPRC5B,HBEGF,HYAL2,IGF1,IGF2,IL31RA,ISL1,PDGFB,PECAM1,PLCG2,RELN,SFRP1,THBS4,THY1
GO:BP	neural crest cell development	GO:0014032	FALSE	0.0157931	1.80153	83	751	13	21128	ALDH1A2,BMP7,CDH2,EDNRB,HAND2,ISL1,SEMA3A,SEMA3D,SEMA3E,SEMA3G,SEMA5B,SEMA6A,SOX10
GO:BP	cardiac muscle cell contraction	GO:0086003	FALSE	0.0158149	1.80093	71	751	12	21128	CTNNA3,DSG2,DSP,FGF12,GPD1L,KCNH2,KCNJ3,PLN,RYR2,SCN2B,SCN4B,SGCD
GO:BP	regulation of catalytic activity	GO:0050790	FALSE	0.0162558	1.78899	2356	751	123	21128	ACACB,ACE,ACVR1C,ADCYAP1R1,ADIPOQ,ADRB2,AFAP1L2,AGTR1,AGTR2,AJUBA,AKAP5,ALDH1A1,ANGPT1,ANXA3,ARHGAP28,ARHGEF15,ASAP3,AVPR1A,BMP7,BTC,C3,CAMK2A,CAP2,CARD10,CASP10,CAV2,CCL21,CCL3,CDKN1C,COL28A1,CRIM1,DBNDD1,DDAH2,DENND2A,DGKI,DMPK,DPM3,EDNRB,EPHA3,EPHA5,EPHA7,EPHB4,ERBB3,ESR1,FABP4,FBLN1,FGD5,FGFR2,FLT1,FLT4,FRMD7,FZD8,GAS6,GPC3,GPER1,GPIHBP1,GPLD1,GPRC5B,GRIN2A,HBEGF,HEG1,HHEX,HYAL2,IGF1,IGF2,ITG…
GO:BP	lymph vessel development	GO:0001945	FALSE	0.0162993	1.78783	30	751	8	21128	ACVRL1,CLEC14A,FLT4,HEG1,KDR,SOX18,SVEP1,TIE1
GO:BP	cardiac conduction	GO:0061337	FALSE	0.0166658	1.77817	96	751	14	21128	ATP1B2,CASQ2,CTNNA3,DSG2,DSP,EHD3,ISL1,KCNH2,KCNJ3,PLN,RYR2,SCN2B,SCN4B,SLC8A1
GO:BP	regulation of muscle contraction	GO:0006937	FALSE	0.0168822	1.77257	166	751	19	21128	ADRA1B,ADRB2,CALCRL,CASQ2,CLIC2,CNN1,CTNNA3,DMPK,DSG2,DSP,EHD3,GPER1,MYOCD,NR4A1,PLN,RYR2,SLC8A1,TNNT2,TPM1
GO:BP	negative regulation of muscle cell differentiation	GO:0051148	FALSE	0.0169014	1.77208	60	751	11	21128	BDNF,FGF9,FZD7,IGF2,MYOCD,NOV,PDGFB,PI16,RBPMS2,SOX6,TMEM119
GO:BP	positive regulation of non-canonical Wnt signaling pathway	GO:2000052	FALSE	0.017083	1.76744	15	751	6	21128	ANKRD6,GPC3,NKD1,RSPO3,SFRP1,WNT5A
GO:BP	visual system development	GO:0150063	FALSE	0.0180882	1.7426	402	751	33	21128	ACVRL1,ADAMTS18,ALDH1A2,ANGPTL7,ARHGEF15,BMP6,BMP7,C3,CDKN1C,CHRDL1,DCLK1,DLL4,FGF10,FGF9,FLT1,GPM6A,IMPG2,JUN,KDR,KLF4,MFAP5,NKD1,NTRK2,OSR2,PROM1,RARB,SERPINF1,SLITRK6,TGFB2,THRB,THY1,TSPAN12,WNT5A
GO:BP	cell-substrate junction assembly	GO:0007044	FALSE	0.0188493	1.72471	97	751	14	21128	ACTN2,ACVRL1,AJUBA,APOD,EPHA3,FAM107A,ITGA6,ITGB4,KDR,MYOC,SFRP1,TEK,THSD1,THY1
GO:BP	negative regulation of canonical Wnt signaling pathway	GO:0090090	FALSE	0.0189576	1.72222	138	751	17	21128	ANKRD6,CDH2,CTHRC1,DACT1,DKK2,GPC3,IGFBP6,ISL1,NKD1,PRICKLE1,SFRP1,SFRP4,SFRP5,SOX10,SOX17,TMEM88,WNT5A
GO:BP	cardiac muscle cell action potential involved in contraction	GO:0086002	FALSE	0.0195178	1.70957	50	751	10	21128	CTNNA3,DSG2,DSP,FGF12,GPD1L,KCNH2,KCNJ3,RYR2,SCN2B,SCN4B
GO:BP	Notch signaling pathway	GO:0007219	FALSE	0.0197413	1.70462	183	751	20	21128	BMP7,CFD,DLL4,DNER,DTX1,EGFL7,FGF10,GRIP2,HEY1,JAG2,NOS3,NOTCH4,NOV,NRARP,NRIP2,PLN,SIX1,SORBS2,TGFB2,TMEM100
GO:BP	nephron development	GO:0072006	FALSE	0.0217819	1.6619	154	751	18	21128	ACTA2,ADIPOQ,AGTR2,ANGPT1,BMP7,CD34,EDNRB,ENPEP,GPC3,KLHL3,OSR1,PDGFB,PECAM1,PKD2,PODXL,PROM1,SIX1,TEK
GO:BP	programmed cell death	GO:0012501	FALSE	0.0223851	1.65004	1948	751	105	21128	ACE,ACKR3,ACTC1,ACTN2,ACTN4,ACVR1C,ADIPOQ,AGTR2,ALDH1A2,AMIGO2,ANGPT1,BDNF,BMP7,BTC,CAMK2A,CARD10,CASP10,CCL21,CCL3,CD248,CDH5,CIDEA,CIDEC,CNTFR,CRIP1,CSRNP3,CX3CR1,DAPL1,DDAH2,DMPK,DNASE1L3,ECSCR,EDNRB,EPHA7,ERBB3,ESR1,FGF10,FGFR2,FHL2,FLT4,GAS6,GIMAP8,GPAM,GPER1,GPLD1,GRIN2A,HAND2,HYAL2,IFI27,IGF1,IL31RA,ISL1,ITGA6,JAG2,JUN,KCNB1,KDR,KLF4,LIMS2,MAP2K6,MEGF10,MPZ,MYOCD,NAA38,NOS3,NPY5R,NR4A1,NR4…
GO:BP	negative regulation of epithelial cell proliferation	GO:0050680	FALSE	0.0230129	1.63803	140	751	17	21128	ACVRL1,CAV2,CDKN1C,DLL4,FGFR2,FLT1,GPC3,ISL1,LIMS2,MMRN2,PPARG,RGCC,SCG2,SERPINF1,SFRP1,TGFB2,WNT5A
GO:BP	regulation of vascular associated smooth muscle cell proliferation	GO:1904705	FALSE	0.0234992	1.62895	62	751	11	21128	ADIPOQ,CALCRL,CNN1,FGF9,GPER1,IGF1,JUN,MYOCD,PDGFB,PPARG,TPM1
GO:BP	negative regulation of chemotaxis	GO:0050922	FALSE	0.0234992	1.62895	62	751	11	21128	DPP4,MMP28,NOV,SEMA3A,SEMA3D,SEMA3E,SEMA3G,SEMA5B,SEMA6A,SLIT2,WNT5A
GO:BP	cellular response to lipid	GO:0071396	FALSE	0.0240052	1.61969	598	751	43	21128	ACE,ADCY1,ALDH1A2,APOB,BMP6,BMP7,BRINP3,CCL3,CD55,CX3CR1,EDNRB,EPHA3,ESR1,FAM107A,FGFR2,FOS,FZD7,GPER1,GPLD1,HAND2,ISL1,LBH,LDOC1,LMO3,LPL,MGARP,MN1,NOS3,OSR1,PGR,PLCB1,PLCG2,PPARG,PTGER4,PTGFR,RAMP3,RXRG,SCNN1B,SERPINF1,SFRP1,SOX10,WNT5A,ZNF366
GO:BP	cardiac muscle cell action potential	GO:0086001	FALSE	0.0245909	1.60923	74	751	12	21128	CTNNA3,DSG2,DSP,FGF12,GPD1L,KCNH2,KCNIP2,KCNJ3,RYR2,SCN2B,SCN4B,SLC8A1
GO:BP	cellular response to organic cyclic compound	GO:0071407	FALSE	0.0246212	1.60869	579	751	42	21128	ACE,ADCY1,ADIPOQ,ALPL,BMP7,CASQ2,CAV2,CCL3,CIITA,CKB,ESR1,FAM107A,GABRB1,GPD1,GPER1,GPLD1,HAND2,ISL1,KLF2,LBH,LMO3,MGARP,MN1,NSG1,PALM,PDGFB,PGR,PKD2,PLCB1,PPARG,PPP1R1B,RAMP3,RXRG,RYR2,RYR3,SCNN1B,SERPINF1,SFRP1,SIX1,SLC8A1,SOX10,ZNF366
GO:BP	regulation of Wnt signaling pathway, planar cell polarity pathway	GO:2000095	FALSE	0.026511	1.57657	16	751	6	21128	ANKRD6,DACT1,GPC3,NKD1,RSPO3,SFRP1
GO:BP	protein localization to cell junction	GO:1902414	TRUE	0.026996	1.5687	100	751	14	21128	ADAM22,CDH5,DSP,GRIN2A,GRIP1,GRIP2,HEG1,LGI1,MPP7,NRXN1,NSG1,PECAM1,RELN,WNT5A
GO:BP	regulation of transferase activity	GO:0051338	FALSE	0.02764	1.55846	908	751	58	21128	ACE,ADIPOQ,ADRB2,AFAP1L2,AGTR1,AJUBA,ANGPT1,BMP7,BTC,CARD10,CCL21,CDKN1C,DBNDD1,EPHA3,EPHA5,EPHA7,EPHB4,ERBB3,FABP4,FGFR2,FLT1,FLT4,FZD8,GAS6,GPRC5B,HBEGF,HEG1,HHEX,HYAL2,IGF1,IGF2,KDR,KLF4,LDB2,MAP2K6,MYOCD,NRXN1,NTRK2,PDGFB,PKD2,PPARG,PPP1R1B,PRKAR2B,PTPRB,RASIP1,RELN,RGCC,ROR2,SFRP1,SLC8A1,SPRY3,TEK,TGFB2,THY1,TIE1,TNXB,TTN,WNT5A
GO:BP	establishment of tissue polarity	GO:0007164	FALSE	0.0283399	1.5476	75	751	12	21128	ANKRD6,CTHRC1,DACT1,FZD7,GPC3,NKD1,PRICKLE1,ROR2,RSPO3,SFRP1,VANGL2,WNT5A
GO:BP	establishment of planar polarity	GO:0001736	FALSE	0.0283399	1.5476	75	751	12	21128	ANKRD6,CTHRC1,DACT1,FZD7,GPC3,NKD1,PRICKLE1,ROR2,RSPO3,SFRP1,VANGL2,WNT5A
GO:BP	cardiac muscle cell development	GO:0055013	FALSE	0.0283399	1.5476	75	751	12	21128	ACTC1,ACTN2,ASB2,FHL2,IGF1,ISL1,NEBL,PI16,SGCD,SLC8A1,SORBS2,TTN
GO:BP	regulation of biomineral tissue development	GO:0070167	FALSE	0.030331	1.51811	101	751	14	21128	ADRB2,ASPN,BMP6,BMP7,CCL3,GAS6,HEY1,NOS3,OMD,OSR1,OSR2,PKDCC,SLC8A1,TMEM119
GO:BP	blood vessel diameter maintenance	GO:0097746	FALSE	0.0305554	1.51491	143	751	17	21128	ACE,ACTA2,ADRA1B,ADRB2,AGTR1,AGTR2,AVPR1A,EDNRB,GPER1,GRIP2,HBB,KCNMB2,KLF2,NOS3,NPR3,SCNN1B,SLC8A1
GO:BP	regulation of tube diameter	GO:0035296	FALSE	0.0305554	1.51491	143	751	17	21128	ACE,ACTA2,ADRA1B,ADRB2,AGTR1,AGTR2,AVPR1A,EDNRB,GPER1,GRIP2,HBB,KCNMB2,KLF2,NOS3,NPR3,SCNN1B,SLC8A1
GO:BP	monoatomic cation homeostasis	GO:0055080	FALSE	0.0306087	1.51416	604	751	43	21128	ACE,AGTR1,ALPL,APLNR,ATP1B2,ATP6V0E2,AVPR1A,BMP6,CASQ2,CAV2,CCL21,CCL3,CDH23,CDH5,CLIC2,DMPK,EDNRB,GPER1,GRIA1,HYAL2,KCNH2,KDR,KLHL3,PKD2,PLCG2,PLN,PRND,RYR2,RYR3,SCARA5,SCN7A,SCNN1B,SGCD,SLC24A4,SLC26A4,SLC8A1,TF,THY1,TMEM175,TRPC6,WFS1,WNT5A,XK
GO:BP	positive regulation of calcium ion transport	GO:0051928	FALSE	0.0318215	1.49728	129	751	16	21128	ADCYAP1R1,AKAP5,APLNR,CAMK2A,CCL3,EHD3,GPER1,PDGFB,PKD2,PLCG2,PLP1,RAMP3,RYR2,THY1,TRPC6,WFS1
GO:BP	positive regulation of synapse assembly	GO:0051965	FALSE	0.0322299	1.49174	64	751	11	21128	AMIGO2,BDNF,CBLN1,CLSTN2,FLRT2,FLRT3,LRRN1,NRXN1,NTRK2,SLITRK1,SLITRK6
GO:BP	blood vessel endothelial cell proliferation involved in sprouting angiogenesis	GO:0002043	FALSE	0.0323021	1.49077	24	751	7	21128	ACVRL1,AGTR1,APLNR,DLL4,MMRN2,NRARP,PPP1R16B
GO:BP	developmental growth involved in morphogenesis	GO:0060560	FALSE	0.0334652	1.47541	238	751	23	21128	BDNF,COBL,DCLK1,EPHA7,ESR1,FGF10,FGFR2,FLRT3,L1CAM,NKD1,NRN1,OLFM1,SEMA3A,SEMA3D,SEMA3E,SEMA3G,SEMA5B,SEMA6A,SFRP1,SIX1,SLIT2,SYT17,WNT5A
GO:BP	regulation of tube size	GO:0035150	FALSE	0.0335204	1.47469	144	751	17	21128	ACE,ACTA2,ADRA1B,ADRB2,AGTR1,AGTR2,AVPR1A,EDNRB,GPER1,GRIP2,HBB,KCNMB2,KLF2,NOS3,NPR3,SCNN1B,SLC8A1
GO:BP	negative regulation of smooth muscle cell proliferation	GO:0048662	FALSE	0.033651	1.473	53	751	10	21128	ADIPOQ,APOD,CNN1,GPER1,MYOCD,NOS3,NPR3,OGN,PPARG,TPM1
GO:BP	regulation of blood vessel endothelial cell migration	GO:0043535	FALSE	0.0345188	1.46194	89	751	13	21128	ACVRL1,AGTR2,ANGPT1,CARD10,DLL4,KDR,KLF4,MEOX2,MMRN2,NOS3,PDGFB,PPARG,RGCC
GO:BP	stem cell development	GO:0048864	FALSE	0.0345188	1.46194	89	751	13	21128	ALDH1A2,BMP7,CDH2,EDNRB,HAND2,ISL1,SEMA3A,SEMA3D,SEMA3E,SEMA3G,SEMA5B,SEMA6A,SOX10
GO:BP	ventricular cardiac muscle cell action potential	GO:0086005	FALSE	0.03518	1.4537	33	751	8	21128	CTNNA3,DSG2,DSP,GPD1L,KCNH2,KCNJ3,RYR2,SCN2B
GO:BP	embryonic digestive tract development	GO:0048566	FALSE	0.03518	1.4537	33	751	8	21128	ALDH1A2,FGF10,FGF9,FGFR2,PKDCC,RARB,RBPMS2,TGFB2
GO:BP	calcium ion transmembrane transport	GO:0070588	FALSE	0.0365946	1.43658	343	751	29	21128	ADCYAP1R1,AKAP5,APLNR,CASQ2,CCL21,CCL3,CLIC2,EDNRB,EHD3,GAS6,GEM,GPER1,GPM6A,GRIN2A,PKD2,PLCG2,PLN,PLP1,RAMP3,REM1,RYR2,RYR3,SLC24A4,SLC8A1,THY1,TRPC6,TRPM3,TRPM6,TSPAN13
GO:BP	phosphatidylinositol 3-kinase signaling	GO:0014065	FALSE	0.0367394	1.43487	145	751	17	21128	ANGPT1,DCN,ERBB3,FLT1,GPER1,IGF1,KDR,MYOC,NTRK2,PDGFB,PPP1R16B,RELN,ROR2,SELP,SEMA3E,TEK,TGFB2
GO:BP	regulation of axonogenesis	GO:0050770	FALSE	0.0369954	1.43185	160	751	18	21128	BDNF,CDH2,CHODL,EPHA7,L1CAM,NTRK2,POU3F2,SEMA3A,SEMA3D,SEMA3E,SEMA3G,SEMA5B,SEMA6A,SLIT2,SLITRK1,THY1,WNT5A,XK
GO:BP	vascular associated smooth muscle cell proliferation	GO:1990874	FALSE	0.0375635	1.42523	65	751	11	21128	ADIPOQ,CALCRL,CNN1,FGF9,GPER1,IGF1,JUN,MYOCD,PDGFB,PPARG,TPM1
GO:BP	eye development	GO:0001654	FALSE	0.0375665	1.4252	398	751	32	21128	ACVRL1,ADAMTS18,ALDH1A2,ANGPTL7,ARHGEF15,BMP6,BMP7,CDKN1C,CHRDL1,DCLK1,DLL4,FGF10,FGF9,FLT1,GPM6A,IMPG2,JUN,KDR,KLF4,MFAP5,NKD1,NTRK2,OSR2,PROM1,RARB,SERPINF1,SLITRK6,TGFB2,THRB,THY1,TSPAN12,WNT5A
GO:BP	cell-substrate junction organization	GO:0150115	FALSE	0.0381092	1.41897	103	751	14	21128	ACTN2,ACVRL1,AJUBA,APOD,EPHA3,FAM107A,ITGA6,ITGB4,KDR,MYOC,SFRP1,TEK,THSD1,THY1
GO:BP	brown fat cell differentiation	GO:0050873	TRUE	0.0399963	1.39798	54	751	10	21128	ADIPOQ,ADRB2,ARL4A,BMP7,EBF2,FABP3,FABP4,FNDC5,SIX1,SLC2A4
GO:BP	positive regulation of ossification	GO:0045778	FALSE	0.0399963	1.39798	54	751	10	21128	ADRB2,BMP6,BMP7,OSR1,OSR2,PKDCC,SLC8A1,TGFB2,TMEM119,WNT5A
GO:BP	positive regulation of protein modification process	GO:0031401	FALSE	0.0400689	1.39719	1005	751	62	21128	ACE,ACVRL1,ADIPOQ,ADRB2,AFAP1L2,AGTR2,AJUBA,ANGPT1,APLNR,BDNF,BMP3,BMP6,BMP7,BTC,C3,CARD10,CCL21,CDH5,CX3CR1,EDNRB,EPHA7,ERBB3,FAM107A,FGF10,FGF9,FLT1,FLT4,FZD8,GAS6,GFRA1,GPER1,GPRC5B,HBEGF,IGF1,IGF2,IL31RA,ISL1,ITLN1,KDR,LEFTY2,MAP2K6,NRXN1,NTRK2,PDGFB,PECAM1,PKD2,PLCG2,PPARG,PPP1R16B,PRICKLE1,RAMP1,RAMP3,RELN,RGCC,ROR2,SH2D3C,TEK,TGFB2,THBS4,TMEM119,WFS1,WNT5A
GO:BP	myelination	GO:0042552	FALSE	0.040231	1.39544	146	751	17	21128	ABCD2,ADAM22,ASPA,CLDN5,EGR2,ID4,ITGB4,LGI4,MPZ,MYOC,NTRK2,PLP1,POU3F2,RXRG,SOX10,TSPAN2,XK
GO:BP	regulation of synaptic plasticity	GO:0048167	FALSE	0.0434277	1.36223	209	751	21	21128	ACE,ADCY1,AKAP5,CAMK2A,CBLN1,CHRDL1,CNTN4,CX3CR1,DGKI,EGR2,FAM107A,GRIA1,GRIN2A,KCNB1,MCTP1,NSG1,NTRK2,PRRT2,RELN,S100B,SHANK3
GO:BP	regulation of protein modification process	GO:0031399	FALSE	0.0437354	1.35917	1540	751	86	21128	ACE,ACVRL1,ADIPOQ,ADRB2,AFAP1L2,AGTR2,AJUBA,ANGPT1,APLNR,BDNF,BMP3,BMP6,BMP7,BTC,C3,CARD10,CCL21,CDH5,CDKN1C,CX3CR1,DBNDD1,EDNRB,EPHA7,ERBB3,FABP4,FAM107A,FBLN1,FGF10,FGF9,FLT1,FLT4,FZD8,GAS6,GFRA1,GPD1L,GPER1,GPRC5B,HBEGF,HEG1,HHEX,HYAL2,IGF1,IGF2,IL31RA,ISL1,ITLN1,JUN,KDR,LEFTY2,MAP2K6,MYOCD,NRXN1,NTRK2,NUAK1,NXN,PDGFB,PECAM1,PKD2,PLCG2,PPARG,PPP1R16B,PPP1R1B,PRICKLE1,PRKAR2B,PTPRB,RAMP1,RAMP3,…
GO:BP	mesenchymal cell proliferation	GO:0010463	FALSE	0.0455199	1.3418	44	751	9	21128	BMP7,FGF9,FGFR2,GPC3,HAND2,KDR,OSR1,SIX1,WNT5A
GO:BP	semaphorin-plexin signaling pathway	GO:0071526	FALSE	0.0455199	1.3418	44	751	9	21128	HAND2,KDR,NCAM1,SEMA3A,SEMA3D,SEMA3E,SEMA3G,SEMA5B,SEMA6A
GO:BP	negative regulation of synaptic transmission	GO:0050805	FALSE	0.047343	1.32474	55	751	10	21128	ADIPOQ,BCHE,CBLN1,DGKI,GRIA1,GRIK3,KCNB1,NPY5R,PCDH17,SHANK3
GO:BP	ventricular cardiac muscle tissue development	GO:0003229	FALSE	0.047343	1.32474	55	751	10	21128	DLL4,DSG2,DSP,FGFR2,HEG1,ISL1,RYR2,TGFB2,TNNT2,TPM1
GO:BP	regulation of BMP signaling pathway	GO:0030510	FALSE	0.0475944	1.32244	105	751	14	21128	ACVRL1,CDH5,CHRDL1,CRIM1,GPC3,GREM2,HTRA3,KDR,PPARG,RBPMS2,SFRP1,SFRP4,SFRP5,WNT5A
GO:BP	ensheathment of neurons	GO:0007272	FALSE	0.048113	1.31774	148	751	17	21128	ABCD2,ADAM22,ASPA,CLDN5,EGR2,ID4,ITGB4,LGI4,MPZ,MYOC,NTRK2,PLP1,POU3F2,RXRG,SOX10,TSPAN2,XK
GO:BP	axon ensheathment	GO:0008366	FALSE	0.048113	1.31774	148	751	17	21128	ABCD2,ADAM22,ASPA,CLDN5,EGR2,ID4,ITGB4,LGI4,MPZ,MYOC,NTRK2,PLP1,POU3F2,RXRG,SOX10,TSPAN2,XK
GO:BP	skeletal muscle organ development	GO:0060538	FALSE	0.049822	1.30258	179	751	19	21128	ASB2,CAV2,CNTFR,DES,DNER,EGR2,FOS,HLF,IGF2,MEGF10,MEOX2,MYOCD,NR1D2,NR4A1,RBM24,RXRG,SIX1,SRPK3,XK
GO:CC	cell periphery	GO:0071944	TRUE	3.78e-49	48.422	6168	789	418	22112	ABCA3,ABCA6,ABCA8,ABCG2,ABI3BP,ACE,ACKR3,ACKR4,ACTA2,ACTG2,ACTN2,ACTN4,ACVR1C,ACVRL1,ADAM22,ADAMTS18,ADAMTS6,ADAMTS7,ADAMTSL5,ADCY1,ADCY4,ADCYAP1R1,ADIPOQ,ADRA1B,ADRB2,AFAP1L2,AGTR1,AGTR2,AJUBA,AKAP5,ALPL,AMIGO2,AMOTL2,ANGPT1,ANGPTL5,ANGPTL7,ANO5,ANXA3,APLNR,APOB,AQP7,ARL4A,ARVCF,ASPN,ATP1B2,ATP8A1,AVPR1A,AZGP1,BCHE,BMP7,BTC,C3,C6,C7,CA4,CALCRL,CAP2,CASP10,CAV2,CBLN1,CCDC141,CD248,CD300LG,CD34,CD…
GO:CC	external encapsulating structure	GO:0030312	FALSE	1.5e-29	28.8242	566	789	88	22112	ABI3BP,ACTA2,ADAMTS18,ADAMTS6,ADAMTS7,ADAMTSL5,ADIPOQ,ALPL,ANGPT1,ANGPTL5,ANGPTL7,ASPN,AZGP1,BMP7,CBLN1,CD248,CDH2,CLEC14A,CLEC3B,COCH,COL12A1,COL15A1,COL21A1,COL28A1,COL6A6,COLQ,CTHRC1,DCN,DGCR6,DPT,ECM2,EGFL7,EMILIN3,FBLN1,FBLN2,FGF10,FGFR2,FLRT2,FLRT3,FRAS1,FREM1,GPC3,GPLD1,HMCN1,HMCN2,IMPG2,ITGB4,KAZALD1,L1CAM,LEFTY2,LINGO1,LRRC17,LRRN1,LRRN2,LTBP1,MATN2,MFAP5,MMP23B,MMP28,MMRN1,MMRN2,MXRA5,M…
GO:CC	extracellular matrix	GO:0031012	FALSE	7.17e-29	28.1442	565	789	87	22112	ABI3BP,ACTA2,ADAMTS18,ADAMTS6,ADAMTS7,ADAMTSL5,ADIPOQ,ALPL,ANGPT1,ANGPTL5,ANGPTL7,ASPN,AZGP1,BMP7,CBLN1,CD248,CDH2,CLEC14A,CLEC3B,COCH,COL12A1,COL15A1,COL21A1,COL28A1,COL6A6,COLQ,CTHRC1,DCN,DGCR6,DPT,ECM2,EGFL7,EMILIN3,FBLN1,FBLN2,FGF10,FGFR2,FLRT2,FLRT3,FRAS1,FREM1,GPC3,GPLD1,HMCN1,HMCN2,IMPG2,ITGB4,KAZALD1,L1CAM,LEFTY2,LINGO1,LRRC17,LRRN1,LRRN2,LTBP1,MATN2,MFAP5,MMP23B,MMP28,MMRN1,MMRN2,MXRA5,M…
GO:CC	plasma membrane	GO:0005886	FALSE	4.98e-27	26.3025	5682	789	346	22112	ABCA3,ABCA6,ABCA8,ABCG2,ACE,ACKR3,ACKR4,ACTN2,ACTN4,ACVR1C,ACVRL1,ADAM22,ADCY1,ADCY4,ADCYAP1R1,ADRA1B,ADRB2,AFAP1L2,AGTR1,AGTR2,AJUBA,AKAP5,ALPL,AMIGO2,AMOTL2,ANGPT1,ANO5,ANXA3,APLNR,APOB,AQP7,ARL4A,ARVCF,ATP1B2,ATP8A1,AVPR1A,AZGP1,BCHE,BTC,C3,C6,C7,CA4,CALCRL,CAP2,CASP10,CAV2,CBLN1,CCDC141,CD248,CD300LG,CD34,CD55,CD69,CD96,CDH2,CDH23,CDH5,CDH8,CHRDL1,CLDN5,CLEC10A,CLEC14A,CLIC2,CLIC5,CLSTN2,CNTF…
GO:CC	extracellular region	GO:0005576	TRUE	5.73e-25	24.242	4234	789	278	22112	ABCA3,ABI3BP,ACE,ACOT11,ACTA2,ACTC1,ACTG2,ACTN2,ACTN4,ADAMTS18,ADAMTS6,ADAMTS7,ADAMTSL5,ADCY1,ADIPOQ,ALDH1A1,ALPL,ANGPT1,ANGPTL5,ANGPTL7,ANXA3,APOB,APOD,ASPN,ATP6V1C2,ATP8A1,AZGP1,BCHE,BDNF,BMP3,BMP6,BMP7,BRINP3,BTC,C16ORF89,C1QL3,C1QTNF2,C1QTNF3,C1QTNF7,C1QTNF9,C3,C6,C7,CA4,CBLN1,CCL15-CCL14,CCL21,CCL3,CD248,CD34,CD55,CDH8,CFD,CFI,CHRDL1,CHST14,CKB,CLEC3A,CLEC3B,CLIC5,CNN2,CNTFR,CNTN3,CNTN4,CNTN…
GO:CC	collagen-containing extracellular matrix	GO:0062023	FALSE	2.1e-24	23.6774	429	789	70	22112	ABI3BP,ACTA2,ADIPOQ,ANGPT1,ANGPTL5,ANGPTL7,ASPN,AZGP1,BMP7,CBLN1,CDH2,CLEC14A,CLEC3B,COCH,COL12A1,COL15A1,COL21A1,COL28A1,COL6A6,COLQ,CTHRC1,DCN,DPT,ECM2,EGFL7,EMILIN3,FBLN1,FBLN2,FGF10,FGFR2,FRAS1,FREM1,GPC3,HMCN1,HMCN2,IMPG2,ITGB4,KAZALD1,L1CAM,LEFTY2,LTBP1,MATN2,MFAP5,MMP23B,MMP28,MMRN1,MMRN2,MXRA5,MYOC,NCAM1,NOV,OGN,OMD,PDGFB,PODN,PTPRQ,SBSPON,SERPINF1,SFRP1,SPON1,SSC5D,TGFB2,THBS4,TIMP3,TINA…
GO:CC	cell junction	GO:0030054	FALSE	1.44e-19	18.8408	2122	789	164	22112	ACTC1,ACTN2,ACTN4,ADAM22,ADCY1,ADCYAP1R1,AFAP1L1,AJUBA,AKAP5,ALDH1A1,AMOTL2,AQP7,ARVCF,ASAP3,ATP1B2,ATP6V0E2,BDNF,CAMK2A,CAP2,CAV2,CBLN1,CCDC85A,CDH2,CDH23,CDH5,CDH8,CHRDL1,CLDN5,CLSTN2,CNN1,CNN2,COLQ,CSRP1,CTNNA3,DACT1,DCLK1,DES,DGKI,DNM1,DOC2B,DPP4,DRP2,DSCAML1,DSG2,DSP,EHD3,EPB41L4B,EPHA7,FAM107A,FGF12,FGFR2,FHL1,FHL2,FLRT2,FLRT3,FLT1,FSCN1,FXYD6,GABRA4,GABRB1,GPER1,GPM6A,GRIA1,GRIA2,GRIK3,GRI…
GO:CC	membrane	GO:0016020	FALSE	2.35e-17	16.6295	9840	789	476	22112	ABCA10,ABCA3,ABCA6,ABCA8,ABCA9,ABCD2,ABCG2,ACACB,ACE,ACKR3,ACKR4,ACTC1,ACTN2,ACTN4,ACVR1C,ACVRL1,ADAM22,ADAM33,ADCY1,ADCY4,ADCYAP1R1,ADRA1B,ADRB2,AFAP1L2,AGTR1,AGTR2,AJUBA,AKAP5,ALPL,AMIGO2,AMOTL2,ANGPT1,ANKRD29,ANO5,ANXA3,APLNR,APOB,AQP7,ARL4A,ARVCF,ATP1B2,ATP6V0E2,ATP6V1C2,ATP8A1,AVPR1A,AZGP1,B3GALT4,BCHE,BTC,C16ORF89,C1QTNF3,C3,C6,C7,CA4,CALCRL,CAMK2A,CAP2,CASP10,CASQ2,CAV2,CBFA2T3,CBLN1,CCDC1…
GO:CC	neuron projection	GO:0043005	FALSE	5.02e-15	14.2992	1391	789	115	22112	ACTN2,ACTN4,ACVRL1,ADAM22,ADCY4,ADCYAP1R1,AKAP5,ALDH1A1,ANXA3,APOD,ARHGEF15,BDNF,BRINP3,CAMK2A,CCDC141,CDH2,CDH23,CDH8,CKB,CLDN5,CLSTN2,CNTN3,CNTN4,COBL,CX3CR1,CYGB,DCLK1,DGKI,DNER,DRP2,DSCAML1,EPHA3,EPHA5,EPHA7,EPHB4,FAM107A,FLRT2,FLRT3,FOS,FRMD7,FSCN1,GABRA4,GABRB1,GFRA1,GPER1,GPM6A,GRIA1,GRIA2,GRIK3,GRIN2A,GRIP1,GRIP2,IL31RA,KCNA4,KCNA6,KCNB1,KCND2,KCNIP2,KCNN3,KLHL14,L1CAM,MGARP,MPL,MYO3A,MYO…
GO:CC	extracellular space	GO:0005615	FALSE	6.5e-14	13.1869	3379	789	208	22112	ABCA3,ABI3BP,ACE,ACOT11,ACTA2,ACTC1,ACTG2,ACTN2,ACTN4,ADCY1,ADIPOQ,ALDH1A1,ALPL,ANGPT1,ANGPTL5,ANGPTL7,ANXA3,APOB,APOD,ASPN,ATP6V1C2,ATP8A1,AZGP1,BCHE,BDNF,BMP3,BMP6,BMP7,BTC,C16ORF89,C1QL3,C1QTNF3,C3,C6,C7,CA4,CBLN1,CCL15-CCL14,CCL21,CCL3,CD248,CD55,CFD,CFI,CHST14,CKB,CLEC3A,CLEC3B,CLIC5,COL12A1,COL15A1,COL21A1,COL28A1,COLQ,CPNE4,CPXM1,CPZ,CREB5,CRISPLD1,CSRP1,CTHRC1,CTSK,CXCL14,CYTL1,DCN,DDAH2,…
GO:CC	cell projection	GO:0042995	FALSE	4.6e-12	11.3372	2389	789	157	22112	ABCG2,ABLIM1,ACE,ACTA2,ACTC1,ACTG2,ACTN2,ACTN4,ACVRL1,ADAM22,ADCY4,ADCYAP1R1,AFAP1L1,AJUBA,AKAP5,ALDH1A1,ANGPT1,ANXA3,APOD,ARHGEF15,ASAP3,ASPN,ATP1B2,BDNF,BRINP3,CA4,CAMK2A,CCDC141,CDH2,CDH23,CDH8,CKB,CLDN5,CLSTN2,CNTN3,CNTN4,COBL,CTNNA3,CX3CR1,CYGB,CYS1,DCLK1,DGKI,DNAH14,DNER,DPP4,DRP2,DSCAML1,EHD3,EPHA3,EPHA5,EPHA7,EPHB4,FAM107A,FGD5,FLRT2,FLRT3,FOS,FRMD7,FSCN1,GABRA4,GABRB1,GFRA1,GPER1,GPM6A,G…
GO:CC	plasma membrane bounded cell projection	GO:0120025	FALSE	1.66e-11	10.7797	2276	789	150	22112	ABCG2,ABLIM1,ACE,ACTA2,ACTC1,ACTG2,ACTN2,ACTN4,ACVRL1,ADAM22,ADCY4,ADCYAP1R1,AJUBA,AKAP5,ALDH1A1,ANGPT1,ANXA3,APOD,ARHGEF15,ASAP3,ATP1B2,BDNF,BRINP3,CA4,CAMK2A,CCDC141,CDH2,CDH23,CDH8,CKB,CLDN5,CLSTN2,CNTN3,CNTN4,COBL,CTNNA3,CX3CR1,CYGB,CYS1,DCLK1,DGKI,DNAH14,DNER,DPP4,DRP2,DSCAML1,EHD3,EPHA3,EPHA5,EPHA7,EPHB4,FAM107A,FGD5,FLRT2,FLRT3,FOS,FRMD7,FSCN1,GABRA4,GABRB1,GFRA1,GPER1,GPM6A,GRIA1,GRIA2,GR…
GO:CC	cell surface	GO:0009986	FALSE	1.69e-11	10.7712	955	789	83	22112	ABCG2,ACE,ACKR3,ACKR4,ACVRL1,ADAMTS7,ADCYAP1R1,ADIPOQ,ATP1B2,AZGP1,C3,CA4,CD248,CD34,CD55,CD69,CDH2,CDH5,CIITA,CLEC10A,CLEC14A,CLSTN2,CNTFR,CTSK,CX3CR1,DPP4,DSCAML1,DSG2,EGFL7,EMCN,ENPEP,EPHA5,FCRL6,FGF10,FGFR2,GFRA1,GPC3,GPIHBP1,GPRC5B,GRIA1,GRIA2,GRIN2A,HBEGF,HEG1,HYAL2,IGSF3,IL12RB2,IL31RA,ITGA6,ITGB4,ITGB8,KCNB1,KCNH2,KCNJ3,KDR,L1CAM,LPL,MPL,NCAM1,NOTCH4,NRXN1,PDGFB,PLVAP,PROM1,RAMP1,RAMP2,RA…
GO:CC	anchoring junction	GO:0070161	FALSE	3e-11	10.5226	983	789	84	22112	ACTC1,ACTN2,ACTN4,ADCYAP1R1,AFAP1L1,AJUBA,AMOTL2,AQP7,ARVCF,ASAP3,CAV2,CCDC85A,CDH2,CDH5,CDH8,CLDN5,CNN1,CNN2,CSRP1,CTNNA3,DES,DPP4,DRP2,DSG2,DSP,EHD3,EPB41L4B,FAM107A,FHL1,FHL2,FLRT2,FLRT3,FLT1,FSCN1,GABRA4,GABRB1,GRIA2,GRIN2A,HEG1,HMCN1,IL16,ITGA6,ITGB4,ITGB8,KCND2,KDR,L1CAM,LDB3,LIMS2,MPP7,NEXN,NOV,OLFM1,PARD6G,PCDH1,PCDH12,PDLIM7,PECAM1,PGM5,PKD2,PLEKHG5,PLXDC1,PODXL,POF1B,PRIMA1,PRKCH,RASIP1…
GO:CC	plasma membrane region	GO:0098590	FALSE	3.21e-09	8.49357	1207	789	91	22112	ABCA8,ABCG2,ACE,ACKR3,ADCYAP1R1,ADRA1B,ADRB2,AKAP5,AQP7,ATP1B2,CA4,CAV2,CBLN1,CD300LG,CD34,CDH2,CDH8,CLDN5,CLIC5,CLSTN2,CNTFR,CTSK,CYS1,DGKI,DNM1,DPP4,DSP,EHD3,ENPEP,EPHA7,ERBB3,FAM107A,FGD5,FLRT3,FSCN1,GABRA4,GABRB1,GPER1,GPIHBP1,GRIA1,GRIA2,GRIK3,GRIN2A,GRIP1,GRIP2,HMCN1,HMCN2,HYAL2,ICAM2,IL31RA,ITGB4,ITLN1,KCNB1,KCND2,LIPE,MPZ,MTTP,MYH10,NOS3,NRXN1,NSG1,PALM,PARD6G,PDGFB,PKD2,PLCG2,PLVAP,PODXL…
GO:CC	somatodendritic compartment	GO:0036477	FALSE	4.95e-09	8.30503	859	789	72	22112	ACTN2,ACVRL1,ADCY4,AKAP5,ANXA3,APOB,APOD,ARHGEF15,BDNF,BRINP3,CAMK2A,CKB,CLSTN2,COBL,CX3CR1,CYGB,DGKI,DNER,DRP2,EPHA5,EPHA7,FRMD7,GABRA4,GABRB1,GFRA1,GPER1,GPM6A,GRIA1,GRIA2,GRIK3,GRIN2A,GRIP1,GRIP2,KCNA4,KCNB1,KCND2,KCNIP2,KCNN3,KLHL14,L1CAM,MPL,MYOT,NEGR1,NOV,NRXN1,NSG1,NTRK2,OLFM1,PALM,PALMD,PLCB4,PLXDC1,PPP1R1B,PPP1R9A,PRKAR2B,PRRT2,PRSS12,RELN,RGS7BP,ROR2,S100B,SAMD4A,SEMA3A,SERPINF1,SERPINI…
GO:CC	synapse	GO:0045202	FALSE	5.52e-09	8.25836	1337	789	97	22112	ACTC1,ACTN2,ADAM22,ADCY1,AKAP5,ALDH1A1,ATP1B2,ATP6V0E2,BDNF,CAMK2A,CAP2,CBLN1,CDH2,CDH23,CDH8,CHRDL1,CLSTN2,COLQ,DACT1,DCLK1,DES,DGKI,DNM1,DOC2B,DRP2,DSCAML1,EPHA7,FAM107A,FGF12,FGFR2,FLRT2,FLRT3,FXYD6,GABRA4,GABRB1,GPER1,GPM6A,GRIA1,GRIA2,GRIK3,GRIN2A,GRIP1,GRIP2,GSG1L,ICA1,IL31RA,KCNA4,KCNA6,KCNB1,KCND2,KCNIP2,KCNJ3,LGI1,MCTP1,MPZ,MYRIP,NMNAT2,NOSTRIN,NPY5R,NR4A1,NRN1,NRXN1,NSG1,NTRK2,OLFM1,PAL…
GO:CC	vesicle	GO:0031982	FALSE	3.46e-08	7.46073	3973	789	213	22112	ABCA3,ACE,ACKR3,ACKR4,ACOT11,ACTA2,ACTC1,ACTG2,ACTN2,ACTN4,ADCY1,ADCYAP1R1,ADRB2,AKAP5,ALDH1A1,ALPL,AMOTL2,ANGPT1,ANO5,ANXA3,APOB,APOD,AQP7,ATP6V0E2,ATP6V1C2,ATP8A1,AVPR1A,AZGP1,BDNF,BMP3,BMP6,BMP7,BTC,C16ORF89,C1QTNF3,C3,C6,C7,CA4,CALCRL,CAMK2A,CAV2,CD248,CD300LG,CD55,CFD,CFI,CHST14,CKB,CLEC3B,CLIC5,CNN2,COL12A1,COL15A1,CPNE4,CREB5,CRISPLD1,CSRP1,CTSK,DDAH2,DES,DGKI,DNER,DNM1,DPP4,DSG2,DSP,DSTN,…
GO:CC	cell-cell junction	GO:0005911	FALSE	3.63e-08	7.43962	510	789	50	22112	ADCYAP1R1,AJUBA,AMOTL2,AQP7,ARVCF,CCDC85A,CDH2,CDH5,CDH8,CLDN5,CNN2,CTNNA3,DES,DPP4,DSG2,DSP,EPB41L4B,FLRT2,FLRT3,FSCN1,HEG1,HMCN1,LDB3,LIMS2,MPP7,NEXN,NOV,PARD6G,PCDH1,PCDH12,PDLIM7,PECAM1,PGM5,PKD2,PLEKHG5,PLXDC1,PODXL,POF1B,PRKCH,RASIP1,SCN4B,SHROOM3,SLC8A1,STXBP6,TEK,TMEM47,TRIM29,TRPC6,VANGL2,WTIP
GO:CC	cell body	GO:0044297	FALSE	2.94e-07	6.53109	576	789	52	22112	ACTA2,ACTC1,ACTG2,ACVRL1,ANXA3,APOB,APOD,ATP1B2,BRINP3,CKB,COBL,CX3CR1,CYGB,DNER,DRP2,EPHA5,EPHA7,FRMD7,GFRA1,GNB4,GPM6A,GRIA1,GRIA2,GRIK3,GRIP1,GRIP2,KCNB1,KCND2,KCNN3,KLHL14,L1CAM,MPL,MYOT,NEGR1,NOV,NRXN1,OLFM1,PLXDC1,PPP1R1B,PRKAR2B,RDH5,RGS7BP,ROR2,S100B,SERPINF1,SERPINI1,SLC8A1,SORBS2,STMN2,TGFB2,THY1,TMEM100
GO:CC	dendritic tree	GO:0097447	FALSE	3.43e-07	6.46431	631	789	55	22112	ACTN2,ACVRL1,ADCY4,AKAP5,ANXA3,APOD,ARHGEF15,BDNF,BRINP3,CAMK2A,CKB,CLSTN2,COBL,CX3CR1,DGKI,DNER,DRP2,EPHA5,EPHA7,GABRA4,GABRB1,GPER1,GPM6A,GRIA1,GRIA2,GRIK3,GRIN2A,GRIP1,GRIP2,KCNA4,KCNB1,KCND2,KCNIP2,L1CAM,NEGR1,NOV,NSG1,NTRK2,PALM,PALMD,PLCB4,PLXDC1,PPP1R9A,PRKAR2B,PRRT2,PRSS12,RELN,RGS7BP,ROR2,SAMD4A,SEMA3A,SLC8A1,SORBS2,THY1,WFS1
GO:CC	dendrite	GO:0030425	FALSE	8.36e-07	6.07775	629	789	54	22112	ACTN2,ACVRL1,ADCY4,AKAP5,ANXA3,APOD,ARHGEF15,BDNF,BRINP3,CAMK2A,CKB,CLSTN2,COBL,DGKI,DNER,DRP2,EPHA5,EPHA7,GABRA4,GABRB1,GPER1,GPM6A,GRIA1,GRIA2,GRIK3,GRIN2A,GRIP1,GRIP2,KCNA4,KCNB1,KCND2,KCNIP2,L1CAM,NEGR1,NOV,NSG1,NTRK2,PALM,PALMD,PLCB4,PLXDC1,PPP1R9A,PRKAR2B,PRRT2,PRSS12,RELN,RGS7BP,ROR2,SAMD4A,SEMA3A,SLC8A1,SORBS2,THY1,WFS1
GO:CC	sarcomere	GO:0030017	TRUE	1.36633e-06	5.86445	217	789	28	22112	ACTC1,ACTN2,ACTN4,ASB2,C10ORF71,CASQ2,CSRP1,DES,FBXL22,FHL2,LDB3,MYOM1,MYOT,NEBL,NEXN,PDLIM7,PGM5,RYR2,RYR3,SLC8A1,SMPX,SORBS2,SPTBN1,SYNC,TMOD2,TNNT2,TPM1,TTN
GO:CC	neuronal cell body	GO:0043025	FALSE	2.40022e-06	5.61975	507	789	46	22112	ACVRL1,ANXA3,APOB,APOD,BRINP3,CKB,COBL,CX3CR1,CYGB,DNER,DRP2,EPHA5,EPHA7,FRMD7,GFRA1,GPM6A,GRIA1,GRIA2,GRIK3,GRIP1,GRIP2,KCNB1,KCND2,KCNN3,KLHL14,L1CAM,MPL,MYOT,NEGR1,NOV,NRXN1,OLFM1,PLXDC1,PPP1R1B,PRKAR2B,RGS7BP,ROR2,S100B,SERPINF1,SERPINI1,SLC8A1,SORBS2,STMN2,TGFB2,THY1,TMEM100
GO:CC	Z disc	GO:0030018	FALSE	3.30881e-06	5.48033	133	789	21	22112	ACTN2,ACTN4,ASB2,C10ORF71,CASQ2,CSRP1,DES,FBXL22,FHL2,LDB3,MYOT,NEBL,NEXN,PDLIM7,PGM5,RYR2,RYR3,SLC8A1,SORBS2,SYNC,TTN
GO:CC	I band	GO:0031674	FALSE	4.09377e-06	5.38788	147	789	22	22112	ACTC1,ACTN2,ACTN4,ASB2,C10ORF71,CASQ2,CSRP1,DES,FBXL22,FHL2,LDB3,MYOT,NEBL,NEXN,PDLIM7,PGM5,RYR2,RYR3,SLC8A1,SORBS2,SYNC,TTN
GO:CC	contractile fiber	GO:0043292	FALSE	6.29668e-06	5.20089	247	789	29	22112	ACTA2,ACTC1,ACTN2,ACTN4,ASB2,C10ORF71,CASQ2,CSRP1,DES,FBXL22,FHL2,LDB3,MYOM1,MYOT,NEBL,NEXN,PDLIM7,PGM5,RYR2,RYR3,SLC8A1,SMPX,SORBS2,SPTBN1,SYNC,TMOD2,TNNT2,TPM1,TTN
GO:CC	glutamatergic synapse	GO:0098978	FALSE	6.84053e-06	5.16491	340	789	35	22112	ACTC1,ADAM22,ADCY1,CBLN1,CDH8,CLSTN2,DGKI,DNM1,DRP2,EPHA7,FLRT3,FXYD6,GPM6A,GRIA1,GRIK3,GRIN2A,GRIP2,GSG1L,KCND2,LGI1,NOSTRIN,NRXN1,NSG1,PCDH17,PLCB1,PLCB4,PPM1H,PRKAR2B,PRRT2,RGS7BP,SH3GL3,SHANK3,SLITRK1,SPTBN1,WNT5A
GO:CC	receptor complex	GO:0043235	TRUE	8.80256e-06	5.05539	529	789	46	22112	ACVR1C,ACVRL1,ADCYAP1R1,ADRB2,CALCRL,CNTFR,EPHA3,EPHA5,EPHA7,EPHB4,ERBB3,FGFR2,FLT1,FLT4,GABRA4,GABRB1,GFRA1,GPRC5B,GRIA1,GRIA2,GRIK3,GRIN2A,IL12RB2,IL31RA,IMPG2,ITGA6,ITGB4,ITGB8,ITLN1,KDR,MTTP,NT5DC3,NTRK2,PEX5L,PLP1,PLXDC1,PPARG,PTPRB,RAMP1,RAMP2,RAMP3,ROR2,TEK,TF,TIE1,TRIL
GO:CC	extracellular vesicle	GO:1903561	FALSE	9.45756e-06	5.02422	2133	789	124	22112	ACE,ACOT11,ACTA2,ACTC1,ACTG2,ACTN2,ACTN4,ADCY1,ALDH1A1,ALPL,ANGPT1,ANXA3,APOB,APOD,ATP6V1C2,ATP8A1,AZGP1,BMP3,C16ORF89,C1QTNF3,C3,C6,C7,CA4,CD248,CD55,CFD,CFI,CHST14,CKB,CLEC3B,CLIC5,COL12A1,COL15A1,CPNE4,CREB5,CRISPLD1,CSRP1,DDAH2,DES,DNM1,DPP4,DSG2,DSP,DSTN,DYSF,ENPEP,ENTPD1,EPHB4,FABP3,FABP4,FBLN1,FBLN2,FLRT2,FSCN1,GALM,GAS6,GATM,GFRA1,GNB4,GPD1,GPD1L,GPLD1,GPM6A,GPRC5B,HBB,HMCN1,IDUA,ISLR,ITG…
GO:CC	extracellular membrane-bounded organelle	GO:0065010	FALSE	9.71309e-06	5.01264	2134	789	124	22112	ACE,ACOT11,ACTA2,ACTC1,ACTG2,ACTN2,ACTN4,ADCY1,ALDH1A1,ALPL,ANGPT1,ANXA3,APOB,APOD,ATP6V1C2,ATP8A1,AZGP1,BMP3,C16ORF89,C1QTNF3,C3,C6,C7,CA4,CD248,CD55,CFD,CFI,CHST14,CKB,CLEC3B,CLIC5,COL12A1,COL15A1,CPNE4,CREB5,CRISPLD1,CSRP1,DDAH2,DES,DNM1,DPP4,DSG2,DSP,DSTN,DYSF,ENPEP,ENTPD1,EPHB4,FABP3,FABP4,FBLN1,FBLN2,FLRT2,FSCN1,GALM,GAS6,GATM,GFRA1,GNB4,GPD1,GPD1L,GPLD1,GPM6A,GPRC5B,HBB,HMCN1,IDUA,ISLR,ITG…
GO:CC	extracellular organelle	GO:0043230	FALSE	9.71309e-06	5.01264	2134	789	124	22112	ACE,ACOT11,ACTA2,ACTC1,ACTG2,ACTN2,ACTN4,ADCY1,ALDH1A1,ALPL,ANGPT1,ANXA3,APOB,APOD,ATP6V1C2,ATP8A1,AZGP1,BMP3,C16ORF89,C1QTNF3,C3,C6,C7,CA4,CD248,CD55,CFD,CFI,CHST14,CKB,CLEC3B,CLIC5,COL12A1,COL15A1,CPNE4,CREB5,CRISPLD1,CSRP1,DDAH2,DES,DNM1,DPP4,DSG2,DSP,DSTN,DYSF,ENPEP,ENTPD1,EPHB4,FABP3,FABP4,FBLN1,FBLN2,FLRT2,FSCN1,GALM,GAS6,GATM,GFRA1,GNB4,GPD1,GPD1L,GPLD1,GPM6A,GPRC5B,HBB,HMCN1,IDUA,ISLR,ITG…
GO:CC	myofibril	GO:0030016	FALSE	1.05557e-05	4.97651	238	789	28	22112	ACTC1,ACTN2,ACTN4,ASB2,C10ORF71,CASQ2,CSRP1,DES,FBXL22,FHL2,LDB3,MYOM1,MYOT,NEBL,NEXN,PDLIM7,PGM5,RYR2,RYR3,SLC8A1,SMPX,SORBS2,SPTBN1,SYNC,TMOD2,TNNT2,TPM1,TTN
GO:CC	extracellular exosome	GO:0070062	FALSE	1.6463e-05	4.78349	2109	789	122	22112	ACE,ACOT11,ACTA2,ACTC1,ACTG2,ACTN2,ACTN4,ADCY1,ALDH1A1,ALPL,ANGPT1,ANXA3,APOB,APOD,ATP6V1C2,ATP8A1,AZGP1,BMP3,C16ORF89,C1QTNF3,C3,C6,C7,CA4,CD248,CD55,CFD,CFI,CHST14,CKB,CLEC3B,CLIC5,COL12A1,COL15A1,CPNE4,CREB5,CRISPLD1,CSRP1,DDAH2,DES,DNM1,DPP4,DSG2,DSP,DSTN,DYSF,ENPEP,ENTPD1,EPHB4,FABP3,FABP4,FBLN1,FLRT2,FSCN1,GALM,GAS6,GATM,GFRA1,GNB4,GPD1,GPD1L,GPLD1,GPM6A,GPRC5B,HBB,HMCN1,IDUA,ISLR,ITGB4,ITG…
GO:CC	axon	GO:0030424	FALSE	1.79335e-05	4.74634	651	789	52	22112	ADAM22,ALDH1A1,ANXA3,BDNF,CDH8,CLDN5,CNTN4,COBL,DGKI,DSCAML1,EPHA5,FLRT3,FRMD7,FSCN1,GFRA1,GPER1,GPM6A,GRIA1,GRIK3,IL31RA,KCNA4,KCNA6,KCNB1,L1CAM,MGARP,MYOC,MYOT,NEXN,NGEF,NMNAT2,NOV,NRXN1,NTRK2,OLFM1,PALM,PLEKHG5,PRRT2,PRSS12,RGS7BP,ROBO4,SCN3A,SCN7A,SCN9A,SEMA3A,SEMA6A,SERPINF1,SH2D3C,SLC8A1,SPTBN1,STMN2,TGFB2,THY1
GO:CC	cytoplasm	GO:0005737	FALSE	6.2749e-05	4.20239	12321	789	509	22112	ABCA3,ABCA6,ABCA8,ABCD2,ABCG2,ABLIM1,ACACB,ACE,ACKR3,ACKR4,ACOT11,ACTA2,ACTC1,ACTG2,ACTN2,ACTN4,ADAMTS7,ADCY1,ADCY4,ADCYAP1R1,ADIPOQ,ADRA1B,ADRB2,AFAP1L1,AFAP1L2,AFF3,AJUBA,AK5,AKAP5,AKR1E2,ALDH1A1,ALDH1A2,ALDH1B1,ALPL,AMOTL2,AMT,ANKRD6,ANO5,ANXA3,APOB,APOD,AQP7,ARHGAP28,ARHGEF15,ARL4A,ARVCF,ASAP3,ASB2,ASPA,ATP1B2,ATP6V0E2,ATP6V1C2,ATP8A1,AVPR1A,B3GALT4,BACH2,BCHE,BDNF,BMP6,BRINP3,BTC,C10ORF71,C1…
GO:CC	actin cytoskeleton	GO:0015629	TRUE	0.000139315	3.856	508	789	42	22112	ABLIM1,ACTA2,ACTC1,ACTG2,ACTN2,ACTN4,AFAP1L1,CDH2,CLDN5,CLIC5,CNN2,COBL,DENND2A,DIAPH3,DSTN,EPHA3,FAM107A,FLT1,FSCN1,KLHL14,LDB3,MYH10,MYO15B,MYO3A,MYO5B,MYO5C,MYOT,MYRIP,NEBL,NEXN,PDLIM7,PGM5,POF1B,PPP1R9A,SHROOM3,SORBS2,SPTBN1,TEK,TMOD2,TNNT2,TPM1,TTN
GO:CC	platelet alpha granule lumen	GO:0031093	TRUE	0.000155257	3.80895	66	789	13	22112	ACTN2,ACTN4,CFD,F8,GAS6,IGF1,IGF2,ISLR,LEFTY2,MMRN1,PDGFB,TGFB2,VWF
GO:CC	platelet alpha granule	GO:0031091	FALSE	0.000203454	3.69153	90	789	15	22112	ACTN2,ACTN4,CFD,F8,GAS6,IGF1,IGF2,ISLR,LEFTY2,MMRN1,PDGFB,PECAM1,SELP,TGFB2,VWF
GO:CC	external side of plasma membrane	GO:0009897	FALSE	0.000363852	3.43907	436	789	37	22112	ABCG2,ACE,ACKR3,ACKR4,ATP1B2,AZGP1,CD248,CD34,CD69,CDH5,CLEC10A,CLEC14A,CNTFR,CTSK,CX3CR1,EMCN,ENPEP,EPHA5,FCRL6,GFRA1,GPIHBP1,GRIA2,HEG1,IL12RB2,IL31RA,ITGA6,KCNJ3,KDR,MPL,NCAM1,SCARA5,SCNN1B,SELP,SLC2A4,STAB2,TF,THY1
GO:CC	contractile actin filament bundle	GO:0097517	FALSE	0.000374301	3.42678	71	789	13	22112	ABLIM1,ACTA2,ACTN4,CNN2,FAM107A,FSCN1,LDB3,MYH10,NEBL,PDLIM7,PGM5,TEK,TPM1
GO:CC	stress fiber	GO:0001725	FALSE	0.000374301	3.42678	71	789	13	22112	ABLIM1,ACTA2,ACTN4,CNN2,FAM107A,FSCN1,LDB3,MYH10,NEBL,PDLIM7,PGM5,TEK,TPM1
GO:CC	endomembrane system	GO:0012505	TRUE	0.000438537	3.35799	4730	789	224	22112	ABCA3,ABCA6,ABCA8,ACE,ACKR3,ACKR4,ACTN2,ACTN4,ADAMTS7,ADCYAP1R1,ADIPOQ,ADRA1B,ADRB2,AJUBA,AKAP5,AMOTL2,ANO5,ANXA3,APOB,APOD,ATP6V0E2,ATP8A1,AVPR1A,B3GALT4,BCHE,BDNF,BRINP3,C3,CA4,CALCRL,CASQ2,CAV2,CBFA2T3,CD300LG,CD55,CDH2,CDH5,CFD,CH25H,CHODL,CHRDL1,CHST10,CHST14,CIDEC,CLEC3B,CLIC5,CLSTN2,CNN2,COL12A1,COL15A1,COL21A1,COL28A1,COLGALT2,CPED1,CTSK,CXCL14,CYP4B1,DACH1,DCN,DGKI,DMPK,DNASE1L3,DNER,DPM…
GO:CC	neuron spine	GO:0044309	FALSE	0.000565484	3.24758	179	789	21	22112	ACTN2,AKAP5,CAMK2A,DGKI,GPER1,GPM6A,GRIA1,GRIA2,GRIN2A,GRIP2,KCNA4,KCND2,NTRK2,PALM,PALMD,PPP1R9A,PRKAR2B,PRRT2,RGS7BP,SHANK3,SLC8A1
GO:CC	basement membrane	GO:0005604	FALSE	0.000808459	3.09234	100	789	15	22112	ACTA2,COL15A1,COL28A1,COLQ,FBLN1,FRAS1,FREM1,HMCN1,HMCN2,ITGB4,MMRN2,SERPINF1,THBS4,TIMP3,VWA1
GO:CC	postsynapse	GO:0098794	FALSE	0.00122593	2.91153	591	789	44	22112	ACTN2,ADCY1,AKAP5,CAMK2A,CAP2,CBLN1,CDH2,CLSTN2,DCLK1,DGKI,DRP2,EPHA7,FLRT3,GABRA4,GABRB1,GPER1,GPM6A,GRIA1,GRIA2,GRIK3,GRIN2A,GRIP1,GRIP2,GSG1L,KCNA4,KCNB1,KCND2,NSG1,NTRK2,PALM,PALMD,PLCB1,PLCB4,PPP1R9A,PRKAR2B,PRRT2,RGS7BP,SH3GL3,SHANK3,SHC4,SLC1A7,SLC8A1,SPTBN1,WNT5A
GO:CC	actomyosin	GO:0042641	FALSE	0.00130747	2.88357	79	789	13	22112	ABLIM1,ACTA2,ACTN4,CNN2,FAM107A,FSCN1,LDB3,MYH10,NEBL,PDLIM7,PGM5,TEK,TPM1
GO:CC	actin filament bundle	GO:0032432	FALSE	0.00130747	2.88357	79	789	13	22112	ABLIM1,ACTA2,ACTN4,CNN2,FAM107A,FSCN1,LDB3,MYH10,NEBL,PDLIM7,PGM5,TEK,TPM1
GO:CC	neuron to neuron synapse	GO:0098984	FALSE	0.00135772	2.86719	336	789	30	22112	ADCY1,AKAP5,ATP1B2,CAMK2A,CAP2,CDH2,CLSTN2,DCLK1,DGKI,DRP2,EPHA7,FLRT3,GPER1,GRIA1,GRIA2,GRIN2A,GRIP1,GRIP2,GSG1L,KCND2,NRXN1,NTRK2,PALM,PLCB4,PPP1R9A,PRRT2,SH3GL3,SHANK3,SLC8A1,SPTBN1
GO:CC	calcitonin family receptor complex	GO:1903439	TRUE	0.00247385	2.60663	5	789	4	22112	CALCRL,RAMP1,RAMP2,RAMP3
GO:CC	adherens junction	GO:0005912	FALSE	0.0024777	2.60595	181	789	20	22112	AJUBA,ARVCF,CCDC85A,CDH2,CDH5,CDH8,CTNNA3,DSP,HMCN1,LDB3,MPP7,NEXN,PDLIM7,PGM5,POF1B,SHROOM3,STXBP6,TMEM47,TRIM29,WTIP
GO:CC	plasma membrane protein complex	GO:0098797	FALSE	0.00314954	2.50175	713	789	49	22112	ACVR1C,ACVRL1,ATP1B2,C6,C7,CALCRL,CASP10,CAV2,CDH2,CDH23,CDH5,CDH8,CNTFR,ERBB3,FZD8,GFRA1,GNB4,GRIA1,GRIA2,GRIK3,GRIN2A,HLA-DMB,HLA-DOA,IGF1,ITGA6,ITGB4,ITGB8,KCNA4,KCNA6,KCNB1,KCND2,KCNH2,KCNIP2,KCNJ3,KCNMB2,MPP7,PGM5,PLP1,RAMP1,RAMP2,RAMP3,SCN2B,SCN3A,SCN4B,SCN7A,SCN9A,SGCD,SGCG,TF
GO:CC	postsynaptic density	GO:0014069	FALSE	0.00372179	2.42925	301	789	27	22112	ADCY1,AKAP5,CAMK2A,CAP2,CDH2,CLSTN2,DCLK1,DGKI,DRP2,FLRT3,GPER1,GRIA1,GRIA2,GRIN2A,GRIP1,GRIP2,GSG1L,KCND2,NTRK2,PALM,PLCB4,PPP1R9A,PRRT2,SH3GL3,SHANK3,SLC8A1,SPTBN1
GO:CC	postsynaptic specialization	GO:0099572	FALSE	0.00472243	2.32583	305	789	27	22112	ADCY1,AKAP5,CAMK2A,CAP2,CDH2,CLSTN2,DCLK1,DGKI,DRP2,FLRT3,GPER1,GRIA1,GRIA2,GRIN2A,GRIP1,GRIP2,GSG1L,KCND2,NTRK2,PALM,PLCB4,PPP1R9A,PRRT2,SH3GL3,SHANK3,SLC8A1,SPTBN1
GO:CC	asymmetric synapse	GO:0032279	FALSE	0.00530941	2.27495	307	789	27	22112	ADCY1,AKAP5,CAMK2A,CAP2,CDH2,CLSTN2,DCLK1,DGKI,DRP2,FLRT3,GPER1,GRIA1,GRIA2,GRIN2A,GRIP1,GRIP2,GSG1L,KCND2,NTRK2,PALM,PLCB4,PPP1R9A,PRRT2,SH3GL3,SHANK3,SLC8A1,SPTBN1
GO:CC	dendritic spine	GO:0043197	FALSE	0.00533668	2.27273	175	789	19	22112	ACTN2,AKAP5,CAMK2A,DGKI,GPER1,GPM6A,GRIA1,GRIA2,GRIN2A,KCNA4,KCND2,NTRK2,PALM,PALMD,PPP1R9A,PRKAR2B,PRRT2,RGS7BP,SLC8A1
GO:CC	cell-substrate junction	GO:0030055	FALSE	0.00541258	2.2666	434	789	34	22112	ACTC1,ACTN2,ACTN4,AJUBA,ASAP3,CAV2,CDH2,CNN1,CNN2,CSRP1,DPP4,EHD3,FAM107A,FHL1,FHL2,FLRT2,FLRT3,FLT1,HMCN1,IL16,ITGA6,ITGB4,ITGB8,L1CAM,LIMS2,NEXN,PDLIM7,PGM5,SCARF2,SMPX,SORBS2,TEK,THSD1,THY1
GO:CC	collagen trimer	GO:0005581	TRUE	0.00812832	2.09	93	789	13	22112	ADIPOQ,C1QL3,C1QTNF2,C1QTNF3,C1QTNF7,C1QTNF9,COL12A1,COL15A1,COL21A1,COL28A1,COL6A6,COLQ,CTHRC1
GO:CC	cell leading edge	GO:0031252	TRUE	0.00898351	2.04655	426	789	33	22112	ABLIM1,ACTA2,ACTC1,ACTG2,AJUBA,AKAP5,ASAP3,CDH2,COBL,CTNNA3,DPP4,FAM107A,FGD5,FSCN1,GABRA4,GPER1,GRIA1,ITGB4,KCNB1,LDB2,MYH10,PDLIM7,PKD2,PLCG2,PLEKHG5,PODXL,S100B,SH2D3C,SORBS2,SPTBN1,STMN2,THY1,TPM1
GO:CC	apical plasma membrane	GO:0016324	FALSE	0.00976072	2.01052	372	789	30	22112	ABCG2,ADRB2,ATP1B2,CA4,CD300LG,CD34,CDH2,CLIC5,CNTFR,CTSK,DPP4,ENPEP,ERBB3,GPIHBP1,HYAL2,KCNB1,PARD6G,PODXL,PROM1,SCNN1B,SHROOM3,SLC24A4,SLC26A4,SLC52A3,SORBS2,TEK,TF,THY1,TRPM6,VANGL2
GO:CC	sodium channel complex	GO:0034706	TRUE	0.0107861	1.96713	27	789	7	22112	GRIK3,SCN2B,SCN3A,SCN4B,SCN7A,SCN9A,SCNN1B
GO:CC	sarcolemma	GO:0042383	FALSE	0.0108803	1.96336	138	789	16	22112	CAV2,CDH2,DES,DYSF,KCNB1,KCNJ3,MYOT,PGM5,RYR2,RYR3,SCN2B,SGCD,SGCG,SLC2A4,SLC8A1,SYNC
GO:CC	interstitial matrix	GO:0005614	FALSE	0.0116145	1.935	12	789	5	22112	ABI3BP,ECM2,KAZALD1,VIT,VWA1
GO:CC	side of membrane	GO:0098552	FALSE	0.0133421	1.87478	631	789	43	22112	ABCG2,ACE,ACKR3,ACKR4,AKAP5,ATP1B2,AZGP1,CAV2,CD248,CD34,CD69,CDH5,CLEC10A,CLEC14A,CNTFR,CTSK,CX3CR1,EMCN,ENPEP,EPHA5,FCRL6,GEM,GFRA1,GNB4,GPIHBP1,GRIA2,HEG1,IL12RB2,IL31RA,ITGA6,KCNJ3,KDR,MPL,NCAM1,PGM5,SCARA5,SCNN1B,SELP,SHANK3,SLC2A4,STAB2,TF,THY1
GO:CC	adrenomedullin receptor complex	GO:1903143	FALSE	0.014324	1.84393	3	789	3	22112	CALCRL,RAMP2,RAMP3
GO:CC	actin-based cell projection	GO:0098858	FALSE	0.0147581	1.83097	221	789	21	22112	ACTA2,ACTC1,ACTG2,ACTN2,ANGPT1,CDH23,FSCN1,GPM6A,HYAL2,ICAM2,MTTP,MYO3A,OSBPL3,PALM,PCDH15,PKHD1L1,PODXL,PPP1R9A,PROM1,TEK,WWOX
GO:CC	ion channel complex	GO:0034702	FALSE	0.0160439	1.79469	309	789	26	22112	CASQ2,CLIC2,CLIC5,GABRA4,GABRB1,GRIA1,GRIA2,GRIK3,GRIN2A,KCNA4,KCNA6,KCNB1,KCND2,KCNH2,KCNIP2,KCNJ3,KCNMB2,PKD2,RYR2,SCN2B,SCN3A,SCN4B,SCN7A,SCN9A,SCNN1B,TRPC6
GO:CC	endoplasmic reticulum lumen	GO:0005788	FALSE	0.0188506	1.72467	312	789	26	22112	ADAMTS7,APOB,BCHE,C3,CASQ2,CDH2,CHRDL1,COL12A1,COL15A1,COL21A1,COL28A1,COLGALT2,F8,GAS6,GPC3,LTBP1,MTTP,PDGFB,RDH5,SCG2,SPON1,SRL,TF,VWA1,WFS1,WNT5A
GO:CC	endocytic vesicle membrane	GO:0030666	TRUE	0.0193614	1.71306	192	789	19	22112	ADRB2,ANXA3,APOB,ATP6V0E2,BTC,CAMK2A,GRIA1,GRIA2,HBEGF,NOS3,NOSTRIN,RAB23,RAB9B,ROR2,SCARF1,STAB2,TF,TYRP1,WNT5A
GO:CC	cell projection membrane	GO:0031253	FALSE	0.0194332	1.71146	349	789	28	22112	ABCG2,ACE,AKAP5,ATP1B2,CA4,CYS1,DPP4,EHD3,FAM107A,FGD5,FSCN1,GABRA4,GPER1,GRIA1,ITLN1,KCNB1,MTTP,PALM,PKD2,PLCG2,PODXL,PROM1,SH2D3C,SLC26A4,SPTBN1,THY1,TPM1,TRPM6
GO:CC	transporter complex	GO:1990351	FALSE	0.0194722	1.71059	424	789	32	22112	ATP1B2,ATP8A1,CASQ2,CLIC2,CLIC5,COX1,CYTB,GABRA4,GABRB1,GRIA1,GRIA2,GRIK3,GRIN2A,KCNA4,KCNA6,KCNB1,KCND2,KCNH2,KCNIP2,KCNJ3,KCNMB2,PKD2,PLN,RYR2,SCN2B,SCN3A,SCN4B,SCN7A,SCN9A,SCNN1B,TMEM30B,TRPC6
GO:CC	focal adhesion	GO:0005925	FALSE	0.0194722	1.71059	424	789	32	22112	ACTC1,ACTN2,ACTN4,AJUBA,ASAP3,CAV2,CDH2,CNN1,CNN2,CSRP1,DPP4,EHD3,FAM107A,FHL1,FHL2,FLRT2,FLRT3,FLT1,IL16,ITGA6,ITGB4,ITGB8,L1CAM,LIMS2,NEXN,PDLIM7,PGM5,SCARF2,SORBS2,TEK,THSD1,THY1
GO:CC	endoplasmic reticulum	GO:0005783	FALSE	0.0220775	1.65605	2033	789	105	22112	ABCA8,ADAMTS7,ADCYAP1R1,ADIPOQ,ANO5,APOB,APOD,ATP8A1,BCHE,BRINP3,C3,CA4,CALCRL,CASQ2,CDH2,CH25H,CHODL,CHRDL1,CIDEC,CLSTN2,COL12A1,COL15A1,COL21A1,COL28A1,COLGALT2,CPED1,CYP4B1,DMPK,DNASE1L3,DPM3,ELOVL7,EPHA5,F8,FAM69B,FGD5,FLRT2,FLRT3,FNDC5,FOS,GAS6,GIMAP1,GIMAP7,GIMAP8,GPC3,GPER1,GRIA1,GRIA2,GRIN2A,GRIP1,HYAL2,IFI27,KCNB1,KDR,KLHL14,LTBP1,MAMDC2,MCTP1,MGLL,MMP23B,MPZ,MRAP2,MTTP,MYOC,NAT8L,NOTCH4…
GO:CC	sarcoplasm	GO:0016528	FALSE	0.02645	1.57757	90	789	12	22112	CASQ2,CTHRC1,DMPK,PLN,RASD1,RYR2,RYR3,SCN3A,SGCD,SLC2A4,SRL,THBS4
GO:CC	transmembrane transporter complex	GO:1902495	FALSE	0.0319931	1.49494	397	789	30	22112	ATP1B2,CASQ2,CLIC2,CLIC5,COX1,CYTB,GABRA4,GABRB1,GRIA1,GRIA2,GRIK3,GRIN2A,KCNA4,KCNA6,KCNB1,KCND2,KCNH2,KCNIP2,KCNJ3,KCNMB2,PKD2,PLN,RYR2,SCN2B,SCN3A,SCN4B,SCN7A,SCN9A,SCNN1B,TRPC6
GO:CC	synaptic membrane	GO:0097060	FALSE	0.0337709	1.47146	305	789	25	22112	CBLN1,CDH8,CLSTN2,DGKI,DNM1,EPHA7,FLRT3,GABRA4,GABRB1,GPER1,GRIA1,GRIA2,GRIK3,GRIN2A,GRIP1,GRIP2,IL31RA,KCNB1,KCND2,NRXN1,NSG1,PRRT2,RIMS4,SHC4,SLC8A1
GO:CC	endocytic vesicle	GO:0030139	FALSE	0.0341985	1.46599	342	789	27	22112	ADRB2,ANXA3,APOB,ATP6V0E2,AVPR1A,BTC,CAMK2A,DPP4,DYSF,EHD3,GRIA1,GRIA2,HBB,HBEGF,HYAL2,NOS3,NOSTRIN,NRXN1,PLEKHG5,RAB23,RAB9B,ROR2,SCARF1,STAB2,TF,TYRP1,WNT5A
GO:CC	apical part of cell	GO:0045177	FALSE	0.0372649	1.4287	439	789	32	22112	ABCG2,ADRB2,ATP1B2,CA4,CD300LG,CD34,CDH2,CLIC5,CNTFR,CTSK,DPP4,ENPEP,EPB41L4B,ERBB3,GPIHBP1,HYAL2,KCNB1,MYO5B,PARD6G,PODXL,PROM1,SCNN1B,SHROOM3,SLC24A4,SLC26A4,SLC52A3,SORBS2,TEK,TF,THY1,TRPM6,VANGL2
GO:CC	cation channel complex	GO:0034703	FALSE	0.0434864	1.36165	204	789	19	22112	CASQ2,GRIK3,KCNA4,KCNA6,KCNB1,KCND2,KCNH2,KCNIP2,KCNJ3,KCNMB2,PKD2,RYR2,SCN2B,SCN3A,SCN4B,SCN7A,SCN9A,SCNN1B,TRPC6
GO:CC	axonal growth cone	GO:0044295	TRUE	0.0497009	1.30364	24	789	6	22112	COBL,FLRT3,GPM6A,L1CAM,NRXN1,OLFM1
KEGG	Dilated cardiomyopathy	KEGG:05414	FALSE	7.4936e-05	4.12531	95	356	17	8091	ACTC1,ADCY1,ADCY4,DES,IGF1,ITGA6,ITGB4,ITGB8,PLN,RYR2,SGCD,SGCG,SLC8A1,TGFB2,TNNT2,TPM1,TTN
KEGG	Circadian entrainment	KEGG:04713	FALSE	0.000101853	3.99203	97	356	17	8091	ADCY1,ADCY4,ADCYAP1R1,CAMK2A,FOS,GNB4,GRIA1,GRIA2,GRIN2A,GUCY1A2,KCNJ3,PER3,PLCB1,PLCB4,RASD1,RYR2,RYR3
KEGG	Calcium signaling pathway	KEGG:04020	FALSE	0.00020987	3.67805	239	356	28	8091	ADCY1,ADCY4,ADRA1B,ADRB2,AGTR1,AVPR1A,CAMK2A,CASQ2,EDNRB,ERBB3,FGF10,FGF9,FGFR2,FLT1,FLT4,GRIN2A,KDR,NOS3,NTRK2,PDGFB,PLCB1,PLCB4,PLCG2,PLN,PTGFR,RYR2,RYR3,SLC8A1
KEGG	Adrenergic signaling in cardiomyocytes	KEGG:04261	FALSE	0.000390084	3.40884	154	356	21	8091	ACTC1,ADCY1,ADCY4,ADRA1B,ADRB2,AGTR1,AGTR2,ATP1B2,CAMK2A,CREB5,PLCB1,PLCB4,PLN,PPP1R1A,PPP2R2B,RYR2,SCN4B,SCN7A,SLC8A1,TNNT2,TPM1
KEGG	Hypertrophic cardiomyopathy	KEGG:05410	FALSE	0.000858093	3.06647	90	356	15	8091	ACE,ACTC1,DES,IGF1,ITGA6,ITGB4,ITGB8,RYR2,SGCD,SGCG,SLC8A1,TGFB2,TNNT2,TPM1,TTN
KEGG	Wnt signaling pathway	KEGG:04310	FALSE	0.00187272	2.72753	170	356	21	8091	CAMK2A,CXXC4,DKK2,FZD7,FZD8,JUN,LGR5,NKD1,PLCB1,PLCB4,PRICKLE1,ROR2,RSPO2,RSPO3,SERPINF1,SFRP1,SFRP4,SFRP5,SOX17,VANGL2,WNT5A
KEGG	Vascular smooth muscle contraction	KEGG:04270	FALSE	0.00242029	2.61613	134	356	18	8091	ACTA2,ACTG2,ADCY1,ADCY4,ADRA1B,AGTR1,AVPR1A,CALCRL,GUCY1A2,KCNMB2,MYH10,PLA2G2A,PLCB1,PLCB4,PRKCH,RAMP1,RAMP2,RAMP3
KEGG	Arrhythmogenic right ventricular cardiomyopathy	KEGG:05412	FALSE	0.00302473	2.51931	77	356	13	8091	ACTN2,CDH2,CTNNA3,DES,DSG2,DSP,ITGA6,ITGB4,ITGB8,RYR2,SGCD,SGCG,SLC8A1
KEGG	Cell adhesion molecules	KEGG:04514	FALSE	0.00440322	2.35623	153	356	19	8091	CD34,CDH2,CDH5,CLDN5,HLA-DMB,HLA-DOA,ICAM2,ITGA6,ITGB8,L1CAM,MPZ,NCAM1,NEGR1,NRXN1,PECAM1,SELL,SELP,SLITRK1,SLITRK6
KEGG	Axon guidance	KEGG:04360	FALSE	0.00485855	2.31349	181	356	21	8091	ABLIM1,BMP7,CAMK2A,EPHA3,EPHA5,EPHA7,EPHB4,L1CAM,NGEF,PARD6G,PLCG2,SEMA3A,SEMA3D,SEMA3E,SEMA3G,SEMA5B,SEMA6A,SLIT2,SRGAP3,TRPC6,WNT5A
KEGG	Regulation of lipolysis in adipocytes	KEGG:04923	FALSE	0.0215778	1.66599	58	356	10	8091	ADCY1,ADCY4,ADRB2,AQP7,CIDEC,FABP4,LIPE,MGLL,NPY1R,PLIN1
KEGG	Rheumatoid arthritis	KEGG:05323	FALSE	0.0499493	1.30147	88	356	12	8091	ANGPT1,ATP6V0E2,ATP6V1C2,CCL3,CTSK,FLT1,FOS,HLA-DMB,HLA-DOA,JUN,TEK,TGFB2
