# Supplementary material for: Integrated bulk and scRNA sequence identified anoikis-related diagnostic biomarkers and potential association with immune infiltration in type A aortic dissection
Source: Aging (Albany NY). 2023 Oct 24;15(20):11268–85. doi: 10.18632/aging.205126 (PMC10637813; doi:10.18632/aging.205126)
Supplement: Supplementary Table 6 [file aging-15-205126-s006.xlsx]

## Sheet: TableS6
Supplementary Table 6. Results of GSEA enrichment analysis between TAAD and HC.
ID	Description	setSize	enrichmentScore	NES	pvalue	p.adjust	qvalues	rank	leading_edge	core_enrichment
SPLICEOSOME	SPLICEOSOME	124	0.49747	1.79937	1.17782e-05	0.00221431	0.0020333	7875	tags=69%, list=40%, signal=42%	HSPA6/HSPA8/SNRPD1/HNRNPA1L2/SNRPF/HNRNPA3/BUD31/SF3B5/RBM8A/DDX23/MAGOHB/SNRPA1/LSM7/PQBP1/PRPF4/THOC3/EFTUD2/U2AF2/PCBP1/SNRPC/LSM4/CTNNBL1/CHERP/HSPA1B/SNRPD2/SRSF4/NCBP2/LSM6/HNRNPC/U2AF1/PRPF40A/SNRPG/EIF4A3/SRSF9/HSPA1A/SYF2/DHX16/SF3B3/SF3A1/WBP11/RBM25/DHX38/USP39/LSM2/PRPF31/BCAS2/PRPF38B/HNRNPU/PRPF19/TCERG1/SNRPE/PPIL1/TRA2B/SF3B4/MAGOH/SF3A3/SRSF1/RBM22/SRSF3/SNRPD3/SNRPA/SNRPB2/HNRNP…
P53_SIGNALING_PATHWAY	P53_SIGNALING_PATHWAY	61	0.598434	1.90507	3.38486e-05	0.00277138	0.00254483	2849	tags=39%, list=14%, signal=34%	IGFBP3/SERPINE1/CD82/GADD45B/RRM2/GTSE1/CDK1/CDKN1A/CCNE1/CDK2/CHEK2/PMAIP1/STEAP3/CCNE2/GADD45G/GADD45A/CCNB2/FAS/SESN2/CCNG2/PTEN/CCNB3/TP53I3/BID
NEUROACTIVE_LIGAND_RECEPTOR_INTERACTION	NEUROACTIVE_LIGAND_RECEPTOR_INTERACTION	167	-0.514226	-1.6601	4.42242e-05	0.00277138	0.00254483	2681	tags=37%, list=14%, signal=32%	GZMA/TACR2/GRIN3A/CALCR/CALCRL/PTGER4/EDNRB/CYSLTR1/GRIA1/OXTR/GRIA2/NPFFR2/CYSLTR2/GABRB2/ADRB2/P2RY13/ADRA2B/F2/GRID2/GPR83/BDKRB1/LPAR4/P2RY10/ADRA2A/SSTR2/THRB/AGTR1/ADRA1D/CTSG/GABRA4/PTGDR/NPY5R/LHCGR/NPY1R/TACR1/OPRK1/GRIA4/ADRA1A/CHRM4/CHRNB4/GABRA2/NMUR1/GRIK1/AVPR1A/CHRM5/GRPR/LEP/HTR1F/GABRB1/ADCYAP1R1/P2RY8/CHRM3/GRIN2A/TRHR/PTGFR/ADRB1/APLNR/P2RY14/AVPR2/GRIN2C/AGTR2/GRIK3
VASCULAR_SMOOTH_MUSCLE_CONTRACTION	VASCULAR_SMOOTH_MUSCLE_CONTRACTION	95	-0.587933	-1.79159	9.00634e-05	0.00423298	0.00388695	4371	tags=43%, list=22%, signal=34%	PLA2G5/MYLK/ADCY9/CALD1/MYL9/PRKCB/ADCY5/ADCY2/ITPR3/CALM1/PLA2G6/ADRA1B/MYH11/ADCY7/KCNMA1/PPP1R14A/NPR1/ACTG2/RAMP1/PRKCQ/CALCRL/MYLK2/KCNMB4/PLCB4/CYP4A22/ACTA2/PRKCH/AGTR1/ADRA1D/ADRA1A/ADCY1/PLCB1/GNAS/AVPR1A/GUCY1A2/ADCY4/CACNA1D/RAMP2/KCNMB2/PLA2G2A/RAMP3
CELL_CYCLE	CELL_CYCLE	122	0.459138	1.656	0.000368016	0.0138374	0.0127062	2842	tags=25%, list=14%, signal=21%	CDC45/ESPL1/GADD45B/ORC1/CDK1/CDC7/CDKN1A/CCNE1/ORC6/CDK2/BUB1B/MYC/CHEK2/E2F2/TTK/PTTG1/CCNE2/MAD2L2/E2F3/PLK1/GADD45G/GADD45A/CCNB2/MAD2L1/CDC20/CCNA1/E2F1/CCNB3/CDC25C/CDC6
CELL_ADHESION_MOLECULES_CAMS	CELL_ADHESION_MOLECULES_CAMS	110	-0.534721	-1.64942	0.000479353	0.0150197	0.0137919	4125	tags=45%, list=21%, signal=35%	PDCD1/HLA-DPA1/HLA-DRA/F11R/ITGA8/NEO1/CADM1/SPN/HLA-DMA/HLA-DRB1/ITGB7/SIGLEC1/PTPRM/CLDN1/ITGAL/NLGN3/CD22/HLA-DOB/HLA-DMB/CD8A/CDH2/NEGR1/HLA-DOA/SELE/SELL/CNTN1/NCAM1/CD34/NLGN4X/CLDN7/CD40LG/HLA-DQB1/ICAM2/HLA-DQA1/HLA-DQA2/ITGB8/JAM2/ICOS/CDH1/PECAM1/ITGA6/MPZ/CDH5/CLDN5/MAG/SELP/L1CAM/NRXN1/CNTN2
CALCIUM_SIGNALING_PATHWAY	CALCIUM_SIGNALING_PATHWAY	145	-0.491867	-1.56692	0.00081585	0.0219114	0.0201202	2674	tags=29%, list=14%, signal=25%	TACR2/BST1/MYLK2/PLN/EDNRB/CYSLTR1/OXTR/CYSLTR2/RYR2/ADRB2/PLCB4/SLC8A3/BDKRB1/PLCG2/AGTR1/SLC8A1/RYR3/ADRA1D/PDE1C/LHCGR/TACR1/ADRA1A/ADCY1/PLCB1/GNAS/AVPR1A/CHRM5/GRPR/CHRM3/GRIN2A/TRHR/PTGFR/ADRB1/ADCY4/ATP2B2/CACNA1D/CACNA1I/NOS1/NOS3/ERBB3/GRIN2C/CAMK2A
DILATED_CARDIOMYOPATHY	DILATED_CARDIOMYOPATHY	78	-0.538113	-1.5918	0.00191998	0.0451194	0.0414311	2112	tags=46%, list=11%, signal=41%	SGCB/LMNA/TNNI3/CACNA2D2/ADCY9/ITGA8/ADCY5/ADCY2/SGCD/ITGB7/ITGA7/DMD/ADCY7/PLN/RYR2/TPM1/MYL2/TGFB2/ACTC1/SLC8A1/CACNA2D3/ITGB8/ADCY1/GNAS/TTN/DES/ITGA6/SGCG/MYBPC3/IGF1/ADRB1/ADCY4/CACNA1D/MYH6/ITGB4/TNNT2
PROTEASOME	PROTEASOME	40	0.536665	1.58692	0.0054369	0.113571	0.104287	7660	tags=78%, list=39%, signal=47%	PSMA6/PSMD11/PSMD12/PSMB8/POMP/PSMB10/PSMB3/PSMD4/PSMC4/PSMC5/PSMA4/PSME4/PSMD14/PSME3/PSMD8/PSMA3/PSMA1/PSMC2/PSMB5/PSMD7/PSME1/PSMD2/PSMD6/PSMA5/PSMB1/PSMC1/PSMC6/PSMB7/PSMD3/PSMB4/PSMB2
ABC_TRANSPORTERS	ABC_TRANSPORTERS	38	-0.619475	-1.64261	0.00745485	0.133644	0.122719	2292	tags=39%, list=12%, signal=35%	ABCA3/ABCA7/ABCB1/ABCG1/ABCA8/ABCB5/ABCC6/ABCA6/ABCA4/ABCA9/ABCG2/ABCD2/ABCA10/ABCC8/ABCB11
HYPERTROPHIC_CARDIOMYOPATHY_HCM	HYPERTROPHIC_CARDIOMYOPATHY_HCM	73	-0.50736	-1.49774	0.00817236	0.133644	0.122719	2112	tags=26%, list=11%, signal=23%	RYR2/TPM1/MYL2/TGFB2/ACTC1/SLC8A1/CACNA2D3/ITGB8/TTN/DES/ITGA6/SGCG/MYBPC3/IGF1/ACE/CACNA1D/MYH6/ITGB4/TNNT2
RENIN_ANGIOTENSIN_SYSTEM	RENIN_ANGIOTENSIN_SYSTEM	15	-0.723556	-1.59125	0.00853048	0.133644	0.122719	1517	tags=47%, list=8%, signal=43%	AGTR1/CTSG/ENPEP/ACE2/ACE/CMA1/AGTR2
WNT_SIGNALING_PATHWAY	WNT_SIGNALING_PATHWAY	134	-0.452396	-1.42866	0.00928021	0.134206	0.123235	3087	tags=29%, list=16%, signal=25%	TBL1X/WIF1/PRKCB/WNT3/FZD6/PPP2R5A/FZD4/FZD2/CTNNBIP1/BTRC/CAMK2G/WNT5B/FZD8/NFATC2/LEF1/FZD7/SFRP1/CXXC4/WNT4/PLCB4/PRICKLE1/JUN/FZD10/LRP5/NKD1/SFRP2/DKK2/WNT5A/SFRP4/PLCB1/APC2/SOX17/VANGL2/WNT11/NKD2/CER1/WNT9B/SFRP5/CAMK2A
APOPTOSIS	APOPTOSIS	80	0.418748	1.40278	0.0116713	0.156729	0.143917	4449	tags=35%, list=23%, signal=27%	IL1RAP/BIRC3/TNFRSF10D/IRAK2/IL1R1/PIK3R5/NFKBIA/IL1A/IRAK4/FAS/MYD88/TNFRSF1A/IRAK3/RELA/BCL2L1/IRAK1/TRADD/BID/FADD/NFKB1/CASP3/CFLAR/BAX/AKT1/ENDOD1/DFFA/BIRC2/RIPK1
GNRH_SIGNALING_PATHWAY	GNRH_SIGNALING_PATHWAY	82	-0.483916	-1.43998	0.0162662	0.196319	0.18027	4392	tags=30%, list=22%, signal=24%	MAP3K1/PLA2G5/ADCY9/PLD1/PRKCB/GNRH1/ADCY5/ADCY2/ITPR3/MAPK12/CALM1/PLA2G6/ADCY7/CAMK2G/HBEGF/PLCB4/JUN/MAP2K6/ADCY1/PLCB1/GNAS/ADCY4/CACNA1D/CAMK2A/PLA2G2A
CARDIAC_MUSCLE_CONTRACTION	CARDIAC_MUSCLE_CONTRACTION	59	-0.517321	-1.47466	0.016708	0.196319	0.18027	2112	tags=22%, list=11%, signal=20%	RYR2/TPM1/MYL2/COX4I2/ACTC1/ATP1B4/COX6A2/SLC8A1/ATP1B2/CACNA2D3/CACNA1D/MYH6/TNNT2
TYPE_I_DIABETES_MELLITUS	TYPE_I_DIABETES_MELLITUS	33	-0.581951	-1.49712	0.0200807	0.222069	0.203916	4516	tags=52%, list=23%, signal=40%	FASLG/HLA-DPB1/HLA-DPA1/HLA-DRA/HLA-DMA/HLA-DRB1/PRF1/HLA-DOB/HLA-DMB/GZMB/HLA-DOA/PTPRN2/HLA-DQB1/HLA-DQA1/HLA-DQA2/ICA1/LTA
NOD_LIKE_RECEPTOR_SIGNALING_PATHWAY	NOD_LIKE_RECEPTOR_SIGNALING_PATHWAY	58	0.468479	1.47516	0.0227841	0.22641	0.207901	1875	tags=19%, list=10%, signal=17%	CCL7/IL6/CCL2/BIRC3/CXCL1/NLRC4/NOD2/TNFAIP3/NFKBIA/CARD6/MAPK13
RNA_POLYMERASE	RNA_POLYMERASE	28	0.561324	1.56767	0.0236326	0.22641	0.207901	5147	tags=61%, list=26%, signal=45%	POLR3GL/POLR2I/POLR2H/POLR2L/POLR1C/POLR2K/POLR3A/POLR2J2/POLR2D/POLR2A/POLR3D/POLR3C/POLR1B/POLR3B/POLR3F/POLR1D/POLR1A
PROTEIN_EXPORT	PROTEIN_EXPORT	22	0.616169	1.58166	0.0240861	0.22641	0.207901	5242	tags=45%, list=27%, signal=33%	SEC61A2/HSPA5/SEC61G/SRPRB/SRP72/SRP19/SEC61A1/SEC63/SRP68/IMMP1L
AXON_GUIDANCE	AXON_GUIDANCE	114	-0.441407	-1.3754	0.0255194	0.228459	0.209783	4042	tags=32%, list=21%, signal=26%	PTK2/UNC5C/EPHA6/CFL2/NTN4/PLXNA1/SEMA6B/PLXNB3/ABLIM2/EFNB2/SEMA3C/ROBO3/SLIT3/PAK3/SEMA3B/NFATC2/SEMA4G/ABLIM1/SLIT1/SRGAP3/SLIT2/SEMA3E/EPHB3/EPHA3/SEMA3F/SEMA3D/EPHB4/SEMA6A/EFNB3/NGEF/SEMA5B/EPHA5/SEMA3A/EPHA7/UNC5A/SEMA3G/L1CAM
ASTHMA	ASTHMA	21	-0.663235	-1.56889	0.0290143	0.247941	0.227672	4418	tags=67%, list=22%, signal=52%	HLA-DPB1/HLA-DPA1/HLA-DRA/HLA-DMA/HLA-DRB1/HLA-DOB/HLA-DMB/HLA-DOA/CD40LG/HLA-DQB1/HLA-DQA1/HLA-DQA2/FCER1A/CCL11
PPAR_SIGNALING_PATHWAY	PPAR_SIGNALING_PATHWAY	57	-0.506703	-1.44556	0.0388489	0.310467	0.285088	2313	tags=30%, list=12%, signal=26%	SLC27A4/ACSL6/CYP4A22/SCD/CD36/FABP3/PPARG/PLIN1/PCK1/APOA1/CYP7A1/LPL/FABP4/SLC27A6/RXRG/AQP7/ADIPOQ
HEDGEHOG_SIGNALING_PATHWAY	HEDGEHOG_SIGNALING_PATHWAY	41	-0.545035	-1.46756	0.0396341	0.310467	0.285088	3864	tags=44%, list=20%, signal=35%	WNT3/GAS1/BMP4/HHIP/BTRC/WNT5B/RAB23/LRP2/WNT4/PTCH2/WNT5A/BMP8B/BMP6/WNT11/WNT9B/DHH/BMP5/BMP7
Anoikis	Anoikis	304	0.28661	1.12064	0.0544587	0.384974	0.353503	2999	tags=22%, list=15%, signal=19%	ANGPTL4/VEGFA/HMOX1/SOD2/SERPINA1/IL1RAP/IL6/HK2/ITGA5/CDCP1/BIRC3/PBK/LAMC2/SLC2A1/MUC1/ITGB3/HMGA1/TUBB3/ITGA2/PLAUR/BIRC5/HGF/MMP11/SNAI2/MMP13/TIMP1/CDKN1A/ANGPTL2/HIF1A/ELANE/PHLDA2/PTGS2/MYC/CHEK2/CEBPB/SHC1/ARHGEF7/SPINK1/PDK4/FN1/PTPN1/PLK1/PTK6/STAT3/ITPRIP/BNIP3/UBE2C/HAVCR2/EZH2/FAS/CDKN3/LAMB3/E2F1/MIR21/TNFRSF1A/SESN2/PTRH2/MCL1/PTEN/RELA/BCL2L1/BID/FADD/MMP9/RANBP9/CLU
COMPLEMENT_AND_COAGULATION_CASCADES	COMPLEMENT_AND_COAGULATION_CASCADES	54	-0.495824	-1.39956	0.055313	0.384974	0.353503	2050	tags=31%, list=10%, signal=28%	F10/CD55/F2/BDKRB1/C2/F8/F7/MASP1/C4BPA/CR2/C3/C7/CFI/C4BPB/C6/CFD/VWF
VIRAL_MYOCARDITIS	VIRAL_MYOCARDITIS	61	-0.485491	-1.39445	0.0557143	0.384974	0.353503	4479	tags=43%, list=23%, signal=33%	CCND1/SGCB/HLA-DPB1/MYH15/HLA-DPA1/HLA-DRA/HLA-DMA/HLA-DRB1/CAV1/PRF1/SGCD/MYH11/DMD/ITGAL/HLA-DOB/HLA-DMB/MYH7B/HLA-DOA/CD55/CD40LG/HLA-DQB1/MYH10/HLA-DQA1/HLA-DQA2/SGCG/MYH6
ALLOGRAFT_REJECTION	ALLOGRAFT_REJECTION	28	-0.566093	-1.41028	0.0581583	0.384974	0.353503	4516	tags=54%, list=23%, signal=41%	FASLG/HLA-DPB1/HLA-DPA1/HLA-DRA/HLA-DMA/HLA-DRB1/PRF1/HLA-DOB/HLA-DMB/GZMB/HLA-DOA/CD40LG/HLA-DQB1/HLA-DQA1/HLA-DQA2
LONG_TERM_DEPRESSION	LONG_TERM_DEPRESSION	55	-0.487751	-1.38341	0.0606061	0.384974	0.353503	2277	tags=29%, list=12%, signal=26%	PRKCB/ITPR3/PLA2G6/GNAZ/RYR1/GRIA1/GRIA2/PLCB4/GRID2/PLCB1/GNAS/GUCY1A2/PRKG2/IGF1/NOS1/PLA2G2A
SMALL_CELL_LUNG_CANCER	SMALL_CELL_LUNG_CANCER	81	0.39006	1.30708	0.0628236	0.384974	0.353503	3063	tags=32%, list=16%, signal=27%	ITGA2B/BIRC3/LAMC2/ITGA2/TRAF1/CCNE1/CDK2/PTGS2/MYC/PIK3R5/NOS2/E2F2/LAMB1/CCNE2/NFKBIA/FN1/E2F3/TRAF4/CKS1B/LAMB3/E2F1/PTEN/RELA/BCL2L1/TRAF3/NFKB1
RNA_DEGRADATION	RNA_DEGRADATION	54	0.415073	1.29105	0.0634797	0.384974	0.353503	7016	tags=56%, list=36%, signal=36%	ENO1/HSPD1/XRN2/ENO2/LSM7/CNOT6/EXOSC8/PATL1/CNOT8/LSM4/LSM6/MPHOSPH6/PAPOLA/DIS3/CNOT10/PNPT1/SKIV2L/EXOSC4/LSM2/HSPA9/EXOSC2/CNOT1/DCP1A/CNOT3/DCPS/DCP2/EXOSC5/EXOSC9/EXOSC1/LSM5
LONG_TERM_POTENTIATION	LONG_TERM_POTENTIATION	60	-0.474548	-1.35851	0.0674319	0.396162	0.363777	3985	tags=25%, list=20%, signal=20%	CAMK4/PRKCB/ITPR3/GRIN2D/CALM1/CAMK2G/GRIA1/GRIA2/PLCB4/ADCY1/PLCB1/PPP1R1A/GRIN2A/GRIN2C/CAMK2A
TYPE_II_DIABETES_MELLITUS	TYPE_II_DIABETES_MELLITUS	39	-0.502441	-1.34708	0.0763473	0.423631	0.389001	1230	tags=13%, list=6%, signal=12%	IRS4/ABCC8/SLC2A4/CACNA1D/ADIPOQ
RIG_I_LIKE_RECEPTOR_SIGNALING_PATHWAY	RIG_I_LIKE_RECEPTOR_SIGNALING_PATHWAY	49	0.41965	1.28449	0.0833333	0.423631	0.389001	4449	tags=35%, list=23%, signal=27%	IFNA5/IFNE/IKBKE/DDX3Y/NFKBIA/MAPK13/TANK/RELA/TRADD/FADD/TRAF3/NFKB1/NFKBIB/TBK1/MAVS/TBKBP1/RIPK1
ALPHA_LINOLENIC_ACID_METABOLISM	ALPHA_LINOLENIC_ACID_METABOLISM	11	-0.677027	-1.4067	0.0834725	0.423631	0.389001	26	tags=45%, list=0%, signal=45%	ACOX3/PLA2G5/FADS2/PLA2G6/PLA2G2A
MTOR_SIGNALING_PATHWAY	MTOR_SIGNALING_PATHWAY	47	0.428871	1.30775	0.087549	0.423631	0.389001	1306	tags=13%, list=7%, signal=12%	VEGFA/DDIT4/PGF/EIF4EBP1/HIF1A/PIK3R5
SYSTEMIC_LUPUS_ERYTHEMATOSUS	SYSTEMIC_LUPUS_ERYTHEMATOSUS	52	-0.466132	-1.30962	0.0877193	0.423631	0.389001	2915	tags=37%, list=15%, signal=31%	HLA-DPA1/HLA-DRA/HLA-DMA/HLA-DRB1/ACTN4/HLA-DOB/HLA-DMB/ACTN2/HLA-DOA/C2/CD40LG/HLA-DQB1/CTSG/HLA-DQA1/HLA-DQA2/GRIN2A/C3/C7/C6
TGF_BETA_SIGNALING_PATHWAY	TGF_BETA_SIGNALING_PATHWAY	78	-0.435799	-1.28915	0.0895105	0.423631	0.389001	2497	tags=19%, list=13%, signal=17%	CHRD/FST/INHBB/TGFB2/ACVRL1/ID4/LEFTY2/BMP8B/BMP6/LTBP1/DCN/ACVR1C/THBS4/BMP5/BMP7
GLYCEROPHOSPHOLIPID_METABOLISM	GLYCEROPHOSPHOLIPID_METABOLISM	61	-0.457217	-1.31324	0.0914286	0.423631	0.389001	4375	tags=31%, list=22%, signal=24%	CDS2/PLA2G5/PLD1/AGPAT2/LPCAT4/CHKB/PLA2G6/GPAM/MBOAT1/CDS1/PCYT2/DGKI/LCAT/GPD1L/GPAT2/DGKG/DGKB/GPD1/PLA2G2A
ARRHYTHMOGENIC_RIGHT_VENTRICULAR_CARDIOMYOPATHY_ARVC	ARRHYTHMOGENIC_RIGHT_VENTRICULAR_CARDIOMYOPATHY_ARVC	63	-0.449519	-1.30316	0.0942335	0.423631	0.389001	3322	tags=43%, list=17%, signal=36%	CACNA2D1/CACNB4/SGCB/JUP/LMNA/CACNA2D2/ITGA8/SGCD/ITGB7/ITGA7/DMD/ACTN4/LEF1/ACTN2/CDH2/RYR2/DSP/DSG2/CTNNA3/SLC8A1/CACNA2D3/ITGB8/DES/ITGA6/SGCG/CACNA1D/ITGB4
RENAL_CELL_CARCINOMA	RENAL_CELL_CARCINOMA	62	0.392504	1.2559	0.095082	0.423631	0.389001	1306	tags=11%, list=7%, signal=11%	VEGFA/EGLN3/SLC2A1/PGF/HGF/HIF1A/PIK3R5
DNA_REPLICATION	DNA_REPLICATION	36	0.460304	1.31701	0.0964912	0.423631	0.389001	6857	tags=58%, list=35%, signal=38%	RFC2/POLE2/FEN1/POLE3/POLE4/MCM2/POLD4/RFC1/POLD3/POLD2/MCM4/RFC4/PCNA/RPA3/PRIM1/DNA2/MCM6/RFC5/PRIM2/RNASEH1/RPA1
REGULATION_OF_ACTIN_CYTOSKELETON	REGULATION_OF_ACTIN_CYTOSKELETON	191	-0.367446	-1.20645	0.0968944	0.423631	0.389001	4042	tags=25%, list=21%, signal=20%	PTK2/MYL9/ITGA8/CFL2/MYL12B/RRAS/PIK3CG/PDGFD/MYL12A/PFN2/IQGAP2/ITGB7/ITGA7/CSK/MYL7/TIAM1/ACTN4/ITGAL/BAIAP2/PAK3/FGFR2/MYL5/MYLK2/ACTN2/MYL2/F2/BDKRB1/ARHGEF4/ITGAD/PDGFB/FGF18/PIP5K1B/MYH10/DIAPH3/ITGB8/FGF11/CHRM4/FGF16/FGFR3/APC2/CHRM5/ITGA6/FGF10/CHRM3/EGF/ITGB4/FGF12/FGF9
GLYCOLYSIS_GLUCONEOGENESIS	GLYCOLYSIS_GLUCONEOGENESIS	50	0.410562	1.26273	0.102804	0.432548	0.397188	3859	tags=40%, list=20%, signal=32%	ADH6/ADH4/HK2/ALDOA/HK3/PGK1/LDHA/TPI1/GAPDH/ALDOC/ENO1/PKM/PGAM4/PFKP/ENO2/PCK2/PGAM2/GPI/ALDH3A2/ADH1A
AMYOTROPHIC_LATERAL_SCLEROSIS_ALS	AMYOTROPHIC_LATERAL_SCLEROSIS_ALS	49	-0.459108	-1.27626	0.10472	0.432548	0.397188	2277	tags=22%, list=12%, signal=20%	MAPK12/GRIN2D/NEFM/GRIA1/GRIA2/MAP2K6/SLC1A2/PRPH/GRIN2A/NOS1/GRIN2C
CYTOSOLIC_DNA_SENSING_PATHWAY	CYTOSOLIC_DNA_SENSING_PATHWAY	39	0.443796	1.2897	0.110778	0.432548	0.397188	4933	tags=54%, list=25%, signal=40%	IFNA5/IL6/POLR3GL/IKBKE/NFKBIA/IL33/POLR1C/RELA/NFKB1/POLR3A/NFKBIB/PYCARD/TBK1/MAVS/POLR3D/POLR3C/RIPK1/POLR3B/POLR3F/IL18/POLR1D
NUCLEOTIDE_EXCISION_REPAIR	NUCLEOTIDE_EXCISION_REPAIR	44	0.417134	1.25375	0.111782	0.432548	0.397188	5258	tags=36%, list=27%, signal=27%	RFC2/POLE2/POLE3/POLE4/POLD4/RFC1/RAD23A/POLD3/ERCC1/POLD2/ERCC4/CDK7/RFC4/PCNA/RPA3/RAD23B
AUTOIMMUNE_THYROID_DISEASE	AUTOIMMUNE_THYROID_DISEASE	31	-0.511484	-1.29949	0.112342	0.432548	0.397188	4516	tags=55%, list=23%, signal=42%	FASLG/HLA-DPB1/HLA-DPA1/TG/HLA-DRA/HLA-DMA/HLA-DRB1/PRF1/HLA-DOB/HLA-DMB/GZMB/HLA-DOA/CD40LG/HLA-DQB1/HLA-DQA1/HLA-DQA2/TPO
TRYPTOPHAN_METABOLISM	TRYPTOPHAN_METABOLISM	32	-0.509802	-1.30144	0.113924	0.432548	0.397188	6204	tags=53%, list=31%, signal=36%	MAOB/EHHADH/AADAT/ACAT2/CAT/ECHS1/ALDH7A1/INMT/HADH/HAAO/ALDH2/ACAT1/IL4I1/ALDH1B1/OGDHL/TPH1/IDO1
BASAL_CELL_CARCINOMA	BASAL_CELL_CARCINOMA	45	-0.462481	-1.2654	0.116766	0.432548	0.397188	3864	tags=38%, list=20%, signal=30%	WNT3/BMP4/FZD6/FZD4/HHIP/FZD2/WNT5B/FZD8/LEF1/FZD7/WNT4/FZD10/PTCH2/WNT5A/APC2/WNT11/WNT9B
MELANOMA	MELANOMA	62	-0.441577	-1.26994	0.119082	0.432548	0.397188	1466	tags=16%, list=7%, signal=15%	PDGFB/FGF18/FGF11/FGF16/CDH1/FGF10/IGF1/EGF/FGF12/FGF9
GLYCOSAMINOGLYCAN_BIOSYNTHESIS_KERATAN_SULFATE	GLYCOSAMINOGLYCAN_BIOSYNTHESIS_KERATAN_SULFATE	14	0.586395	1.36233	0.121287	0.432548	0.397188	2097	tags=29%, list=11%, signal=26%	CHST1/ST3GAL1/B4GALT1/CHST2
SULFUR_METABOLISM	SULFUR_METABOLISM	12	0.617322	1.39218	0.124069	0.432548	0.397188	1377	tags=25%, list=7%, signal=23%	CHST13/SULT1A2/SULT1A3
NOTCH_SIGNALING_PATHWAY	NOTCH_SIGNALING_PATHWAY	43	-0.4664	-1.26114	0.124242	0.432548	0.397188	4538	tags=28%, list=23%, signal=22%	DLL1/MFNG/NOTCH1/LFNG/DTX4/KAT2B/PSEN2/DTX2/DLL4/NOTCH4/JAG2/DTX1
HISTIDINE_METABOLISM	HISTIDINE_METABOLISM	21	-0.553991	-1.31048	0.132376	0.44877	0.412084	6204	tags=52%, list=31%, signal=36%	MAOB/TRMT11/HEMK1/HNMT/ALDH7A1/HDC/ALDH2/ALDH3A1/ALDH1B1/ALDH1A3/ASPA
MISMATCH_REPAIR	MISMATCH_REPAIR	23	0.486633	1.27297	0.133676	0.44877	0.412084	5073	tags=43%, list=26%, signal=32%	RFC2/EXO1/POLD4/RFC1/POLD3/POLD2/RFC4/PCNA/RPA3/PMS2
ADIPOCYTOKINE_SIGNALING_PATHWAY	ADIPOCYTOKINE_SIGNALING_PATHWAY	62	-0.431738	-1.24165	0.136298	0.449546	0.412797	2892	tags=19%, list=15%, signal=17%	PPARGC1A/ACSL5/PRKCQ/ACSL6/ACACB/CD36/IRS4/PCK1/LEP/SLC2A4/RXRG/ADIPOQ
MELANOGENESIS	MELANOGENESIS	83	-0.406154	-1.21139	0.147586	0.478383	0.439277	3983	tags=34%, list=20%, signal=27%	PRKCB/WNT3/ADCY5/ADCY2/FZD6/FZD4/CALM1/FZD2/ADCY7/CAMK2G/WNT5B/FZD8/LEF1/FZD7/EDNRB/WNT4/PLCB4/EDN1/FZD10/TYRP1/WNT5A/ADCY1/PLCB1/GNAS/WNT11/ADCY4/WNT9B/CAMK2A
HOMOLOGOUS_RECOMBINATION	HOMOLOGOUS_RECOMBINATION	26	0.4552	1.23324	0.151436	0.482542	0.443096	5324	tags=38%, list=27%, signal=28%	RAD51/EME1/BLM/XRCC2/POLD4/POLD3/POLD2/RPA3/XRCC3/BRCA2
GLYCOSAMINOGLYCAN_BIOSYNTHESIS_CHONDROITIN_SULFATE	GLYCOSAMINOGLYCAN_BIOSYNTHESIS_CHONDROITIN_SULFATE	21	0.504007	1.28193	0.154667	0.484622	0.445006	5419	tags=52%, list=28%, signal=38%	CHST13/CHSY1/CHST3/XYLT1/DSE/UST/B3GAT3/CSGALNACT2/B4GALT7/XYLT2/B3GALT6
VALINE_LEUCINE_AND_ISOLEUCINE_DEGRADATION	VALINE_LEUCINE_AND_ISOLEUCINE_DEGRADATION	42	-0.455741	-1.23083	0.161339	0.489712	0.44968	6410	tags=52%, list=33%, signal=35%	HMGCS1/ACADSB/IVD/EHHADH/ACAA2/ACAT2/ACADM/HIBADH/ECHS1/ALDH7A1/HIBCH/ABAT/ALDH6A1/HADH/ALDH2/BCKDHB/ACAT1/PCCB/OXCT2/OXCT1/IL4I1/ALDH1B1
THYROID_CANCER	THYROID_CANCER	27	-0.504213	-1.25144	0.161501	0.489712	0.44968	2780	tags=19%, list=14%, signal=16%	RET/LEF1/PPARG/CDH1/RXRG
PENTOSE_AND_GLUCURONATE_INTERCONVERSIONS	PENTOSE_AND_GLUCURONATE_INTERCONVERSIONS	9	-0.662636	-1.29963	0.165812	0.494804	0.454355	367	tags=44%, list=2%, signal=44%	DCXR/GUSB/CRYL1/UGT2B4
ALZHEIMERS_DISEASE	ALZHEIMERS_DISEASE	132	-0.366737	-1.15574	0.170828	0.496829	0.456215	2059	tags=8%, list=10%, signal=8%	SNCA/PLCB4/COX4I2/COX6A2/RYR3/PLCB1/GRIN2A/CACNA1D/LPL/NOS1/GRIN2C
ECM_RECEPTOR_INTERACTION	ECM_RECEPTOR_INTERACTION	78	-0.399377	-1.1814	0.172028	0.496829	0.456215	1928	tags=18%, list=10%, signal=16%	TNXB/CHAD/GP5/CD36/ITGB8/SV2B/ITGA6/TNN/LAMA3/THBS4/ITGB4/COL6A6/VWF/RELN
AMINO_SUGAR_AND_NUCLEOTIDE_SUGAR_METABOLISM	AMINO_SUGAR_AND_NUCLEOTIDE_SUGAR_METABOLISM	40	0.405224	1.19825	0.174419	0.496829	0.456215	5294	tags=40%, list=27%, signal=29%	HK2/HK3/NANS/GNPNAT1/UAP1/UGDH/NPL/CHIT1/GPI/GMDS/GALK1/PGM1/GMPPB/PGM2/PGM3/GNE
PRIMARY_BILE_ACID_BIOSYNTHESIS	PRIMARY_BILE_ACID_BIOSYNTHESIS	12	-0.601981	-1.28145	0.186978	0.524656	0.481767	5881	tags=58%, list=30%, signal=41%	SCP2/CYP27A1/CYP7B1/ACOX2/CYP46A1/CYP7A1/CH25H
CHRONIC_MYELOID_LEUKEMIA	CHRONIC_MYELOID_LEUKEMIA	70	0.346127	1.13366	0.191126	0.528408	0.485212	3372	tags=23%, list=17%, signal=19%	CDKN1A/MYC/PIK3R5/E2F2/SHC1/NFKBIA/BCR/E2F3/E2F1/RELA/BCL2L1/SOS1/SHC3/NFKB1/CBLB/SMAD3
BLADDER_CANCER	BLADDER_CANCER	39	0.400814	1.16479	0.197605	0.535443	0.491672	1970	tags=18%, list=10%, signal=16%	MMP1/VEGFA/PGF/CDKN1A/MYC/E2F2/E2F3
GRAFT_VERSUS_HOST_DISEASE	GRAFT_VERSUS_HOST_DISEASE	31	-0.470598	-1.19561	0.199367	0.535443	0.491672	4516	tags=48%, list=23%, signal=37%	FASLG/HLA-DPB1/HLA-DPA1/HLA-DRA/HLA-DMA/HLA-DRB1/PRF1/HLA-DOB/HLA-DMB/GZMB/HLA-DOA/HLA-DQB1/HLA-DQA1/HLA-DQA2/KIR2DL1
AMINOACYL_TRNA_BIOSYNTHESIS	AMINOACYL_TRNA_BIOSYNTHESIS	22	0.467176	1.19921	0.209424	0.541285	0.497037	52	tags=5%, list=0%, signal=5%	YARS2
GLYCEROLIPID_METABOLISM	GLYCEROLIPID_METABOLISM	37	-0.451928	-1.18811	0.211568	0.541285	0.497037	3513	tags=30%, list=18%, signal=24%	ALDH2/GPAM/MBOAT1/MGLL/DGKI/GPAT2/ALDH1B1/DGKG/LIPF/DGKB/LPL
FOCAL_ADHESION	FOCAL_ADHESION	189	-0.34257	-1.127	0.21358	0.541285	0.497037	4505	tags=30%, list=23%, signal=23%	PIK3R3/CCND1/PDGFC/PARVB/VEGFB/LAMA5/MYLK/LAMB4/TNR/PTK2/MYL9/PRKCB/ITGA8/COL1A2/MYL12B/PIK3CG/PDGFD/MYL12A/LAMC3/ILK/CAV1/FLNB/ITGB7/ITGA7/MYL7/FLNA/COL11A1/COL4A6/ACTN4/SHC2/PAK3/CAV2/MYL5/SHC4/MYLK2/ACTN2/JUN/MYL2/TNXB/CHAD/PDGFB/ITGB8/FLT1/ITGA6/TNN/KDR/FLT4/IGF1/LAMA3/EGF/THBS4/ITGB4/RASGRF1/COL6A6/VWF/RELN
NON_HOMOLOGOUS_END_JOINING	NON_HOMOLOGOUS_END_JOINING	11	0.571264	1.25601	0.215881	0.541285	0.497037	6797	tags=73%, list=34%, signal=48%	FEN1/POLM/NHEJ1/XRCC4/DCLRE1C/XRCC6/XRCC5/PRKDC
PENTOSE_PHOSPHATE_PATHWAY	PENTOSE_PHOSPHATE_PATHWAY	23	0.451495	1.18105	0.215938	0.541285	0.497037	4858	tags=57%, list=25%, signal=43%	TKTL1/ALDOA/ALDOC/TKT/PFKP/PGD/PRPS2/GPI/H6PD/TALDO1/PGM1/PRPS1/PGM2
BETA_ALANINE_METABOLISM	BETA_ALANINE_METABOLISM	20	-0.517135	-1.2156	0.221138	0.547026	0.502308	6093	tags=50%, list=31%, signal=35%	EHHADH/ACADM/ECHS1/ALDH7A1/HIBCH/ABAT/ALDH2/UPB1/ALDH1B1/DPYS
CYTOKINE_CYTOKINE_RECEPTOR_INTERACTION	CYTOKINE_CYTOKINE_RECEPTOR_INTERACTION	199	-0.336595	-1.11252	0.230207	0.557176	0.511629	2308	tags=23%, list=12%, signal=21%	CD27/LTB/INHBB/IL7/IL2RB/TNFSF9/TGFB2/ACVRL1/CXCL9/XCL2/MPL/IL17B/TNFSF10/CD40LG/IL3RA/PDGFB/XCR1/CCL3/CCL3L3/CXCR3/EDA/IL23R/FLT1/CCR7/TNFRSF19/IL12RB2/LEP/KDR/FLT4/IL20RA/EDAR/CX3CR1/TNFRSF8/CCL14/CCL23/CCL16/IL23A/LTA/EGF/CXCL11/CCL11/CCL21/BMP7/TPO/CNTFR/CXCL14
PROXIMAL_TUBULE_BICARBONATE_RECLAMATION	PROXIMAL_TUBULE_BICARBONATE_RECLAMATION	20	-0.509271	-1.19711	0.23252	0.557176	0.511629	4714	tags=60%, list=24%, signal=46%	ATP1B1/GLS2/SLC38A3/MDH1/ATP1A2/ATP1A4/GLS/CA2/ATP1B4/ATP1B2/PCK1/CA4
PHOSPHATIDYLINOSITOL_SIGNALING_SYSTEM	PHOSPHATIDYLINOSITOL_SIGNALING_SYSTEM	69	-0.389837	-1.13816	0.234133	0.557176	0.511629	5248	tags=35%, list=27%, signal=26%	INPP4A/PLCB2/ITPKB/CALM2/PLCD1/PIK3R3/INPP4B/CDS2/PLCD3/INPP5D/PRKCB/PIK3CG/ITPR3/CALM1/INPP5A/PIK3C2B/CDS1/DGKI/PLCB4/DGKG/PLCG2/PIP5K1B/PLCB1/DGKB
PORPHYRIN_AND_CHLOROPHYLL_METABOLISM	PORPHYRIN_AND_CHLOROPHYLL_METABOLISM	21	0.450338	1.14542	0.258667	0.605736	0.556219	1099	tags=14%, list=6%, signal=14%	HMOX1/CP/FTH1
REGULATION_OF_AUTOPHAGY	REGULATION_OF_AUTOPHAGY	20	0.455255	1.14153	0.260982	0.605736	0.556219	244	tags=5%, list=1%, signal=5%	IFNA5
HIF-1 signaling pathway	HIF-1 signaling pathway	90	0.320823	1.09063	0.274809	0.63005	0.578546	2782	tags=30%, list=14%, signal=26%	VEGFA/HMOX1/HKDC1/IL6/HK2/EGLN3/SERPINE1/SLC2A1/EIF4EBP1/TIMP1/CDKN1A/HIF1A/ALDOA/NOS2/HK3/PGK1/LDHA/GAPDH/ENO1/STAT3/PDK1/CAMK2B/PRKCG/CAMK2D/IFNGR1/RELA/TFRC
GAP_JUNCTION	GAP_JUNCTION	76	-0.369115	-1.08611	0.289174	0.654996	0.601452	2002	tags=28%, list=10%, signal=25%	TUBA1A/PDGFC/ADCY9/PRKCB/ADCY5/ADCY2/PDGFD/ITPR3/TUBB1/ADCY7/PLCB4/TUBB4A/PDGFB/ADCY1/PLCB1/GNAS/GUCY1A2/PRKG2/ADRB1/ADCY4/EGF
VASOPRESSIN_REGULATED_WATER_REABSORPTION	VASOPRESSIN_REGULATED_WATER_REABSORPTION	40	-0.407695	-1.09597	0.296353	0.663265	0.609045	1056	tags=8%, list=5%, signal=7%	CREB5/GNAS/AVPR2
STEROID_HORMONE_BIOSYNTHESIS	STEROID_HORMONE_BIOSYNTHESIS	26	-0.445599	-1.0965	0.308562	0.682467	0.626677	1962	tags=23%, list=10%, signal=21%	HSD17B3/CYP11A1/CYP3A5/CYP7A1/UGT2B4/HSD11B2
MAPK_SIGNALING_PATHWAY	MAPK_SIGNALING_PATHWAY	227	-0.318559	-1.06602	0.313772	0.685921	0.629849	1512	tags=9%, list=8%, signal=9%	NR4A1/BDNF/PDGFB/FGF18/DUSP4/CACNA2D3/MAP2K6/FGF11/FGF16/FGFR3/FOS/NTRK2/FGF10/CACNA1D/EGF/CACNA1I/RASGRF1/PTPN5/FGF12/FGF9/PLA2G2A
ENDOCYTOSIS	ENDOCYTOSIS	168	-0.33054	-1.06709	0.328698	0.71029	0.652226	3448	tags=14%, list=17%, signal=11%	PSD3/MVB12B/ARRB1/GRK4/ARAP2/RET/FGFR2/ASAP3/PARD6G/IL2RB/ADRB2/EHD3/PIP5K1B/FGFR3/FLT1/IQSEC3/PSD/DNM1/KDR/ADRB1/SH3GL3/EGF/ERBB3
ARGININE_AND_PROLINE_METABOLISM	ARGININE_AND_PROLINE_METABOLISM	49	-0.383936	-1.06729	0.333333	0.712121	0.653907	1949	tags=18%, list=10%, signal=17%	ALDH1B1/GATM/CKB/PRODH/OTC/CKM/NOS1/NOS3/DAO
FRUCTOSE_AND_MANNOSE_METABOLISM	FRUCTOSE_AND_MANNOSE_METABOLISM	30	0.383453	1.07697	0.342391	0.723254	0.66413	2518	tags=27%, list=13%, signal=23%	AKR1B10/HK2/ALDOA/HK3/TPI1/ALDOC/PFKFB4/SORD
ALDOSTERONE_REGULATED_SODIUM_REABSORPTION	ALDOSTERONE_REGULATED_SODIUM_REABSORPTION	37	-0.404474	-1.06335	0.351598	0.727423	0.667959	1656	tags=41%, list=8%, signal=37%	SGK1/ATP1B1/PIK3R3/SLC9A3R2/ATP1A2/PRKCB/PIK3CG/NR3C2/ATP1A4/ATP1B4/ATP1B2/IRS4/IGF1/HSD11B2/SCNN1B
ETHER_LIPID_METABOLISM	ETHER_LIPID_METABOLISM	22	-0.456395	-1.08333	0.356452	0.727423	0.667959	1176	tags=27%, list=6%, signal=26%	PLA2G5/PLD1/LPCAT4/PLA2G6/ENPP6/PLA2G2A
PANCREATIC_CANCER	PANCREATIC_CANCER	67	0.323538	1.04202	0.370629	0.727423	0.667959	3372	tags=19%, list=17%, signal=16%	VEGFA/RAD51/PGF/PIK3R5/E2F2/E2F3/STAT3/E2F1/RELA/BCL2L1/NFKB1/RAC2/SMAD3
GLYCOSAMINOGLYCAN_BIOSYNTHESIS_HEPARAN_SULFATE	GLYCOSAMINOGLYCAN_BIOSYNTHESIS_HEPARAN_SULFATE	22	-0.451496	-1.0717	0.372581	0.727423	0.667959	3060	tags=36%, list=16%, signal=31%	NDST1/EXT1/HS3ST1/GLCE/HS3ST3B1/EXTL1/NDST3/NDST4
CYSTEINE_AND_METHIONINE_METABOLISM	CYSTEINE_AND_METHIONINE_METABOLISM	28	0.37501	1.04733	0.373368	0.727423	0.667959	2156	tags=14%, list=11%, signal=13%	AMD1/SDS/LDHA/BHMT
DRUG_METABOLISM_CYTOCHROME_P450	DRUG_METABOLISM_CYTOCHROME_P450	40	-0.38842	-1.04416	0.37386	0.727423	0.667959	1320	tags=22%, list=7%, signal=21%	FMO3/GSTM5/ALDH3A1/ALDH1A3/CYP3A5/CYP2D6/FMO1/UGT2B4/GSTA1
PANTOTHENATE_AND_COA_BIOSYNTHESIS	PANTOTHENATE_AND_COA_BIOSYNTHESIS	16	-0.487385	-1.0869	0.37479	0.727423	0.667959	2638	tags=38%, list=13%, signal=33%	PPCDC/ENPP3/VNN1/ENPP1/UPB1/DPYS
MATURITY_ONSET_DIABETES_OF_THE_YOUNG	MATURITY_ONSET_DIABETES_OF_THE_YOUNG	7	-0.594324	-1.1012	0.376114	0.727423	0.667959	1689	tags=57%, list=9%, signal=52%	PAX6/HNF4G/HHEX/NR5A2
FOLATE_BIOSYNTHESIS	FOLATE_BIOSYNTHESIS	8	-0.572455	-1.09151	0.379189	0.727423	0.667959	137	tags=38%, list=1%, signal=37%	GGH/QDPR/ALPL
ACUTE_MYELOID_LEUKEMIA	ACUTE_MYELOID_LEUKEMIA	55	0.329323	1.0224	0.385113	0.731326	0.671543	3063	tags=20%, list=16%, signal=17%	EIF4EBP1/RARA/MYC/PIK3R5/PIM1/STAT3/CCNA1/PPARD/RELA/SOS1/NFKB1
PRIMARY_IMMUNODEFICIENCY	PRIMARY_IMMUNODEFICIENCY	29	-0.416232	-1.04208	0.3952	0.742976	0.68224	3152	tags=31%, list=16%, signal=26%	ADA/CD3D/CD3E/LCK/CD8A/CIITA/CD40LG/ICOS/ZAP70
TAURINE_AND_HYPOTAURINE_METABOLISM	TAURINE_AND_HYPOTAURINE_METABOLISM	7	-0.580907	-1.07634	0.40107	0.746545	0.685517	257	tags=43%, list=1%, signal=42%	GGT7/CSAD/GGT1
GLYCOSPHINGOLIPID_BIOSYNTHESIS_LACTO_AND_NEOLACTO_SERIES	GLYCOSPHINGOLIPID_BIOSYNTHESIS_LACTO_AND_NEOLACTO_SERIES	18	-0.46088	-1.06521	0.405583	0.747545	0.686435	4821	tags=39%, list=24%, signal=29%	FUT7/ST8SIA1/B3GNT2/B3GNT5/ABO/B3GALT2/FUT1
TOLL_LIKE_RECEPTOR_SIGNALING_PATHWAY	TOLL_LIKE_RECEPTOR_SIGNALING_PATHWAY	84	0.301327	1.01819	0.416667	0.760518	0.698348	3869	tags=29%, list=20%, signal=23%	IFNA5/SPP1/TLR2/IL6/LBP/IKBKE/PIK3R5/NFKBIA/MAPK13/TLR5/IRAK4/MYD88/CD40/RELA/IRAK1/FADD/TRAF3/NFKB1/IFNAR1/MAP3K8/IFNAR2/CD14/TBK1/AKT1
ASCORBATE_AND_ALDARATE_METABOLISM	ASCORBATE_AND_ALDARATE_METABOLISM	7	-0.566466	-1.04959	0.424242	0.761777	0.699504	3513	tags=57%, list=18%, signal=47%	ALDH7A1/ALDH2/ALDH1B1/UGT2B4
TERPENOID_BACKBONE_BIOSYNTHESIS	TERPENOID_BACKBONE_BIOSYNTHESIS	13	-0.481626	-1.03679	0.425461	0.761777	0.699504	7400	tags=85%, list=38%, signal=53%	PMVK/GGPS1/FDPS/PDSS1/DHDDS/HMGCS1/MVD/ACAT2/IDI1/MVK/ACAT1
ALANINE_ASPARTATE_AND_GLUTAMATE_METABOLISM	ALANINE_ASPARTATE_AND_GLUTAMATE_METABOLISM	26	-0.416909	-1.0259	0.434572	0.763547	0.701129	3257	tags=31%, list=17%, signal=26%	GLS2/ABAT/GLS/ALDH4A1/ALDH5A1/GPT/IL4I1/ASPA
PROPANOATE_METABOLISM	PROPANOATE_METABOLISM	28	-0.410708	-1.02318	0.434572	0.763547	0.701129	6093	tags=46%, list=31%, signal=32%	EHHADH/ACAT2/ACADM/ECHS1/ALDH7A1/HIBCH/ABAT/ALDH6A1/ALDH2/ACAT1/PCCB/ALDH1B1/ACACB
PATHWAYS_IN_CANCER	PATHWAYS_IN_CANCER	293	0.254339	0.996888	0.438849	0.763922	0.701474	2896	tags=20%, list=15%, signal=17%	MMP1/FGF5/FGF23/VEGFA/IL6/EGLN3/RAD51/ITGA2B/BIRC3/LAMC2/SLC2A1/WNT10B/BMP2/PGF/ITGA2/BIRC5/HGF/WNT2/RASSF5/TRAF1/CDKN1A/CCNE1/HIF1A/PDGFRA/RARA/CDK2/PTGS2/MYC/PIK3R5/NOS2/E2F2/LAMB1/PDGFA/CCNE2/NFKBIA/BCR/NKX3-1/FN1/E2F3/STAT3/NFKB2/FZD5/TRAF4/AXIN2/CKS1B/FAS/PRKCG/CCNA1/LAMB3/E2F1/PPARD/PTEN/RELA/BCL2L1/SOS1/BID/FADD/TRAF3/MMP9
TASTE_TRANSDUCTION	TASTE_TRANSDUCTION	33	-0.386904	-0.995344	0.470958	0.812294	0.745891	3184	tags=42%, list=16%, signal=36%	PLCB2/ASIC2/TAS2R20/TAS2R13/TAS2R31/ITPR3/TAS2R14/TAS2R19/TAS1R3/KCNB1/GNAS/TAS2R7/ADCY4/SCNN1B
GLYCOSAMINOGLYCAN_DEGRADATION	GLYCOSAMINOGLYCAN_DEGRADATION	19	-0.425216	-0.991498	0.476974	0.815191	0.748552	4870	tags=32%, list=25%, signal=24%	NAGLU/IDS/HS3ST3B1/HYAL2/IDUA/HYAL1
PHENYLALANINE_METABOLISM	PHENYLALANINE_METABOLISM	13	-0.462446	-0.995506	0.482412	0.817058	0.750266	3733	tags=31%, list=19%, signal=25%	HPD/ALDH3A1/IL4I1/ALDH1A3
INOSITOL_PHOSPHATE_METABOLISM	INOSITOL_PHOSPHATE_METABOLISM	49	-0.351054	-0.975883	0.488201	0.81948	0.75249	5658	tags=33%, list=29%, signal=23%	INPP5K/ISYNA1/INPP4A/PLCB2/ITPKB/PLCD1/INPP4B/PLCD3/ALDH6A1/PIK3CG/INPP5A/PIK3C2B/PLCB4/PLCG2/PIP5K1B/PLCB1
ERBB_SIGNALING_PATHWAY	ERBB_SIGNALING_PATHWAY	80	-0.327563	-0.973775	0.505571	0.836134	0.767783	3049	tags=15%, list=15%, signal=13%	AREG/CAMK2G/SHC2/PAK3/SHC4/HBEGF/JUN/PLCG2/BTC/EGF/ERBB3/CAMK2A
ENDOMETRIAL_CANCER	ENDOMETRIAL_CANCER	49	-0.34549	-0.960415	0.517699	0.836134	0.767783	5571	tags=27%, list=28%, signal=19%	MAP2K2/ERBB2/APC/MAPK1/PIK3R3/CCND1/PIK3CG/ILK/LEF1/CTNNA3/APC2/CDH1/EGF
LIMONENE_AND_PINENE_DEGRADATION	LIMONENE_AND_PINENE_DEGRADATION	9	-0.505696	-0.991822	0.519658	0.836134	0.767783	6093	tags=56%, list=31%, signal=38%	EHHADH/ECHS1/ALDH7A1/ALDH2/ALDH1B1
OLFACTORY_TRANSDUCTION	OLFACTORY_TRANSDUCTION	37	-0.366033	-0.962294	0.523592	0.836134	0.767783	1387	tags=16%, list=7%, signal=15%	PDE1C/CLCA2/OR5P2/PRKG2/CAMK2A/OR51E1
FC_EPSILON_RI_SIGNALING_PATHWAY	FC_EPSILON_RI_SIGNALING_PATHWAY	63	-0.329157	-0.954226	0.52602	0.836134	0.767783	5632	tags=27%, list=29%, signal=19%	MAPK10/MAP2K2/LAT/MAPK1/MAPK11/MAP2K4/PIK3R3/PLA2G5/INPP5D/PRKCB/PIK3CG/MAPK12/PLA2G6/PLCG2/MAP2K6/FCER1A/PLA2G2A
JAK_STAT_SIGNALING_PATHWAY	JAK_STAT_SIGNALING_PATHWAY	112	0.273504	0.97548	0.528	0.836134	0.767783	3074	tags=25%, list=16%, signal=21%	LIF/IFNA5/IL11/IFNE/IL6/OSMR/TSLP/IL24/MYC/PIK3R5/CLCF1/EPOR/IL22RA1/PIM1/IL4R/IL15RA/JAK3/SPRY4/PRLR/STAT3/IL20RB/SPRY2/IFNGR1/BCL2L1/CISH/SOS1/IL2RA/SOCS3
TIGHT_JUNCTION	TIGHT_JUNCTION	111	-0.314565	-0.973177	0.529255	0.836134	0.767783	4001	tags=27%, list=20%, signal=22%	CASK/MYL9/PRKCB/F11R/EPB41L2/PPP2R2C/MYL12B/RRAS/MYL12A/MYH11/MYL7/CLDN1/ACTN4/LLGL2/MYL5/PRKCQ/PPP2R2B/MYH7B/ACTN2/PARD6G/MYL2/PRKCH/CLDN7/CTNNA3/MYH10/JAM2/TJP3/RAB3B/CLDN5/MYH6
PURINE_METABOLISM	PURINE_METABOLISM	139	-0.306234	-0.972303	0.544402	0.852896	0.783174	3261	tags=17%, list=17%, signal=15%	GMPR/PDE3B/ADA/NT5C1A/ADCY7/PDE10A/NPR1/POLR2J3/PDE8B/ENPP1/ENTPD1/NT5M/AK7/PDE1C/AMPD1/ADCY1/AK5/GUCY2C/GUCY1A2/PDE9A/ADCY4/PDE6A/ENTPD2/ENTPD3
NITROGEN_METABOLISM	NITROGEN_METABOLISM	18	0.375516	0.925407	0.562341	0.857489	0.787392	1193	tags=17%, list=6%, signal=16%	CA9/CA12/CA13
LEISHMANIA_INFECTION	LEISHMANIA_INFECTION	66	-0.321109	-0.934174	0.572238	0.857489	0.787392	4030	tags=29%, list=20%, signal=23%	HLA-DPA1/HLA-DRA/PRKCB/HLA-DMA/JAK2/MAPK12/HLA-DRB1/MARCKSL1/NCF1/HLA-DOB/HLA-DMB/HLA-DOA/JUN/TGFB2/HLA-DQB1/HLA-DQA1/HLA-DQA2/FOS/C3
ANTIGEN_PROCESSING_AND_PRESENTATION	ANTIGEN_PROCESSING_AND_PRESENTATION	62	-0.325023	-0.934744	0.572453	0.857489	0.787392	2570	tags=31%, list=13%, signal=27%	RFXAP/HLA-DPB1/CD74/HLA-DPA1/HLA-DRA/HLA-DMA/HLA-DRB1/HLA-DOB/KLRC4/HLA-DMB/CD8A/HLA-DOA/CIITA/HLA-DQB1/HLA-DQA1/HLA-DQA2/KIR2DL1/KLRC3/LTA
CIRCADIAN_RHYTHM_MAMMAL	CIRCADIAN_RHYTHM_MAMMAL	13	0.394909	0.908895	0.577778	0.857489	0.787392	3313	tags=38%, list=17%, signal=32%	BHLHE40/ARNTL/NPAS2/NR1D1/CSNK1E
FATTY_ACID_METABOLISM	FATTY_ACID_METABOLISM	40	0.312274	0.923395	0.581395	0.857489	0.787392	347	tags=5%, list=2%, signal=5%	ADH6/ADH4
ONE_CARBON_POOL_BY_FOLATE	ONE_CARBON_POOL_BY_FOLATE	16	0.374221	0.905	0.584767	0.857489	0.787392	5151	tags=44%, list=26%, signal=32%	MTHFD2/SHMT2/GART/TYMS/MTHFR/ATIC/MTFMT
RETINOL_METABOLISM	RETINOL_METABOLISM	31	-0.365167	-0.927749	0.585443	0.857489	0.787392	2811	tags=29%, list=14%, signal=25%	CYP26B1/RDH5/ALDH1A2/CYP4A22/ALDH1A1/DHRS9/CYP3A5/LRAT/UGT2B4
INTESTINAL_IMMUNE_NETWORK_FOR_IGA_PRODUCTION	INTESTINAL_IMMUNE_NETWORK_FOR_IGA_PRODUCTION	35	-0.353874	-0.924395	0.58689	0.857489	0.787392	4586	tags=46%, list=23%, signal=35%	TNFSF13B/HLA-DPB1/IL15/HLA-DPA1/HLA-DRA/HLA-DMA/HLA-DRB1/ITGB7/HLA-DOB/HLA-DMB/HLA-DOA/CD40LG/HLA-DQB1/HLA-DQA1/HLA-DQA2/ICOS
VEGF_SIGNALING_PATHWAY	VEGF_SIGNALING_PATHWAY	63	-0.319152	-0.925221	0.589311	0.857489	0.787392	4505	tags=22%, list=23%, signal=17%	PIK3R3/PLA2G5/PTK2/PRKCB/PIK3CG/MAPK12/PLA2G6/SH2D2A/SHC2/NFATC2/PLCG2/KDR/NOS3/PLA2G2A
DRUG_METABOLISM_OTHER_ENZYMES	DRUG_METABOLISM_OTHER_ENZYMES	27	-0.374991	-0.930714	0.597064	0.857489	0.787392	3349	tags=26%, list=17%, signal=22%	NAT2/CES1/UPB1/CDA/CYP3A5/UGT2B4/DPYS
NATURAL_KILLER_CELL_MEDIATED_CYTOTOXICITY	NATURAL_KILLER_CELL_MEDIATED_CYTOTOXICITY	102	0.268601	0.94015	0.598425	0.857489	0.787392	3580	tags=24%, list=18%, signal=19%	ULBP1/IFNA5/RAET1G/TNFRSF10D/ICAM1/PIK3R5/HCST/FCGR3A/SHC1/ULBP3/FAS/PRKCG/IFNGR1/TYROBP/SOS1/BID/SHC3/IFNAR1/PRKCA/RAC2/ULBP2/CASP3/VAV2/IFNAR2
BIOSYNTHESIS_OF_UNSATURATED_FATTY_ACIDS	BIOSYNTHESIS_OF_UNSATURATED_FATTY_ACIDS	18	-0.38673	-0.89383	0.604269	0.857489	0.787392	5028	tags=39%, list=26%, signal=29%	HSD17B12/ACOX3/FADS2/ACOT2/PECR/SCD/ELOVL2
CITRATE_CYCLE_TCA_CYCLE	CITRATE_CYCLE_TCA_CYCLE	29	-0.369769	-0.925751	0.6096	0.857489	0.787392	7891	tags=52%, list=40%, signal=31%	ACO2/FH/SUCLG1/SDHB/SDHD/SUCLA2/OGDH/IDH1/MDH2/PC/SDHA/IDH3G/MDH1/OGDHL/PCK1
HEMATOPOIETIC_CELL_LINEAGE	HEMATOPOIETIC_CELL_LINEAGE	73	-0.310746	-0.917328	0.611189	0.857489	0.787392	3558	tags=30%, list=18%, signal=25%	HLA-DRB1/THPO/IL5RA/IL11RA/CD3D/CD3E/CD22/CD8A/IL7/CD5/CD55/CD34/GP5/CD36/IL3RA/CD1C/MS4A1/ITGA6/CR2/FCER2/CD1E/TPO
SELENOAMINO_ACID_METABOLISM	SELENOAMINO_ACID_METABOLISM	22	-0.380341	-0.902805	0.617742	0.860263	0.789939	257	tags=23%, list=1%, signal=22%	TRMT11/GGT7/HEMK1/SEPHS1/GGT1
ARACHIDONIC_ACID_METABOLISM	ARACHIDONIC_ACID_METABOLISM	38	-0.341208	-0.904751	0.623494	0.861889	0.791432	257	tags=16%, list=1%, signal=16%	HPGDS/LTC4S/CYP4A22/GGT1/PTGDS/PLA2G2A
ADHERENS_JUNCTION	ADHERENS_JUNCTION	66	-0.308926	-0.898731	0.643059	0.876774	0.805101	3094	tags=14%, list=16%, signal=12%	PTPRM/LMO7/ACTN4/BAIAP2/LEF1/ACTN2/CTNNA3/CDH1/PTPRB
STEROID_BIOSYNTHESIS	STEROID_BIOSYNTHESIS	17	0.356089	0.869006	0.64359	0.876774	0.805101	3024	tags=29%, list=15%, signal=25%	CYP27B1/SOAT1/NSDHL/EBP/DHCR24
VALINE_LEUCINE_AND_ISOLEUCINE_BIOSYNTHESIS	VALINE_LEUCINE_AND_ISOLEUCINE_BIOSYNTHESIS	7	0.42777	0.842687	0.655329	0.886344	0.813888	1848	tags=14%, list=9%, signal=13%	BCAT1
NON_SMALL_CELL_LUNG_CANCER	NON_SMALL_CELL_LUNG_CANCER	52	-0.314834	-0.88454	0.662281	0.889348	0.816647	1725	tags=8%, list=9%, signal=7%	PLCG2/RARB/EGF/RXRG
GALACTOSE_METABOLISM	GALACTOSE_METABOLISM	21	0.337631	0.858755	0.674667	0.899556	0.82602	4858	tags=38%, list=25%, signal=29%	HK2/HK3/B4GALT1/PFKP/GALK1/PGM1/GLA/PGM2
LINOLEIC_ACID_METABOLISM	LINOLEIC_ACID_METABOLISM	16	-0.377917	-0.842783	0.682353	0.901406	0.827718	843	tags=12%, list=4%, signal=12%	CYP3A5/PLA2G2A
GLYOXYLATE_AND_DICARBOXYLATE_METABOLISM	GLYOXYLATE_AND_DICARBOXYLATE_METABOLISM	14	0.36371	0.844984	0.685644	0.901406	0.827718	774	tags=7%, list=4%, signal=7%	MTHFD2
CHEMOKINE_SIGNALING_PATHWAY	CHEMOKINE_SIGNALING_PATHWAY	164	-0.282126	-0.908945	0.701135	0.915371	0.840542	3465	tags=24%, list=18%, signal=20%	XCL1/GNG7/ARRB1/CCL8/ELMO1/CSK/CCL4/GRK4/GNG11/TIAM1/GNB4/ADCY7/RASGRP2/NCF1/SHC2/CCL13/CCL19/CXCL10/SHC4/ITK/PLCB4/CXCL9/XCL2/GNGT2/XCR1/CCL3/CCL3L3/CXCR3/ADCY1/PLCB1/CCR7/CX3CR1/CCL14/CCL23/ADCY4/CCL16/CXCL11/CCL11/CCL21/CXCL14
T_CELL_RECEPTOR_SIGNALING_PATHWAY	T_CELL_RECEPTOR_SIGNALING_PATHWAY	96	-0.286232	-0.875341	0.716755	0.92931	0.853342	3727	tags=17%, list=19%, signal=14%	PIK3CG/MAPK12/CD3D/CD3E/LCK/PAK3/NFATC2/PRKCQ/CD8A/RASGRP1/ITK/JUN/CD40LG/ICOS/ZAP70/FOS
BUTANOATE_METABOLISM	BUTANOATE_METABOLISM	29	-0.334964	-0.838612	0.7344	0.933926	0.857581	4255	tags=48%, list=22%, signal=38%	HMGCS1/EHHADH/ACAT2/ECHS1/ALDH7A1/ABAT/HADH/ALDH2/ACAT1/ALDH5A1/OXCT2/OXCT1/ALDH1B1/ACSM5
PROGESTERONE_MEDIATED_OOCYTE_MATURATION	PROGESTERONE_MEDIATED_OOCYTE_MATURATION	78	0.260977	0.871433	0.735192	0.933926	0.857581	2775	tags=18%, list=14%, signal=15%	GNAI2/CDK1/CDK2/PIK3R5/MAD2L2/SPDYA/MAPK13/PLK1/RPS6KA1/CCNB2/MAD2L1/CCNA1/CCNB3/CDC25C
STARCH_AND_SUCROSE_METABOLISM	STARCH_AND_SUCROSE_METABOLISM	27	0.304751	0.840414	0.735219	0.933926	0.857581	2194	tags=22%, list=11%, signal=20%	HK2/PYGL/HK3/AMY1B/UGDH/GBE1
GLYCINE_SERINE_AND_THREONINE_METABOLISM	GLYCINE_SERINE_AND_THREONINE_METABOLISM	28	-0.325306	-0.81042	0.751212	0.947837	0.870355	3850	tags=21%, list=20%, signal=17%	SHMT1/DMGDH/PHGDH/GATM/AMT/DAO
SPHINGOLIPID_METABOLISM	SPHINGOLIPID_METABOLISM	31	-0.322628	-0.819673	0.762658	0.955013	0.876944	94	tags=16%, list=0%, signal=16%	SGMS1/GAL3ST1/ASAH1/ASAH2/SMPD3
GLYCOSPHINGOLIPID_BIOSYNTHESIS_GLOBO_SERIES	GLYCOSPHINGOLIPID_BIOSYNTHESIS_GLOBO_SERIES	12	-0.360087	-0.766522	0.767947	0.955013	0.876944	581	tags=25%, list=3%, signal=24%	ST8SIA1/B3GALNT1/FUT1
BASE_EXCISION_REPAIR	BASE_EXCISION_REPAIR	33	0.285456	0.816238	0.778082	0.955013	0.876944	5309	tags=33%, list=27%, signal=24%	POLE2/FEN1/POLE3/POLE4/POLD4/POLD3/POLD2/APEX1/PCNA/PARP3/APEX2
GLIOMA	GLIOMA	60	-0.288136	-0.82486	0.790531	0.955013	0.876944	2941	tags=22%, list=15%, signal=18%	PIK3R3/CCND1/PRKCB/PIK3CG/CALM1/CAMK2G/SHC2/SHC4/PLCG2/PDGFB/IGF1/EGF/CAMK2A
RIBOFLAVIN_METABOLISM	RIBOFLAVIN_METABOLISM	13	-0.353184	-0.760298	0.792295	0.955013	0.876944	2638	tags=46%, list=13%, signal=40%	ACP6/PHPT1/RFK/ENPP3/ENPP1/MTMR7
SNARE_INTERACTIONS_IN_VESICULAR_TRANSPORT	SNARE_INTERACTIONS_IN_VESICULAR_TRANSPORT	38	0.28871	0.836563	0.798817	0.955013	0.876944	5726	tags=32%, list=29%, signal=22%	STX1A/STX19/STX6/STX11/USE1/STX4/VTI1B/VAMP8/STX8/BET1L/BET1/YKT6
PRION_DISEASES	PRION_DISEASES	32	-0.307646	-0.785371	0.808544	0.955013	0.876944	407	tags=9%, list=2%, signal=9%	NCAM1/C7/C6
PYRIMIDINE_METABOLISM	PYRIMIDINE_METABOLISM	93	0.251632	0.861912	0.810811	0.955013	0.876944	4505	tags=37%, list=23%, signal=28%	PNP/RRM2/UPP1/POLR3GL/POLE2/NME1/TK1/POLR2I/POLR2H/UCK2/POLR2L/POLE3/POLR1C/NT5E/CANT1/POLE4/POLR2K/POLR3A/POLR2J2/TYMS/POLD4/POLD3/TYMP/NME6/POLR2D/POLD2/RRM1/POLR2A/POLR3D/POLR3C/RRM2B/NME2/POLR1B/POLR3B
NICOTINATE_AND_NICOTINAMIDE_METABOLISM	NICOTINATE_AND_NICOTINAMIDE_METABOLISM	23	0.297227	0.777507	0.812339	0.955013	0.876944	2588	tags=22%, list=13%, signal=19%	NAMPT/PNP/NNMT/CD38/NT5E
METABOLISM_OF_XENOBIOTICS_BY_CYTOCHROME_P450	METABOLISM_OF_XENOBIOTICS_BY_CYTOCHROME_P450	38	0.283581	0.821702	0.813609	0.955013	0.876944	1999	tags=18%, list=10%, signal=17%	ADH6/ADH4/CYP3A43/AKR1C1/CYP1B1/CYP3A4/AKR1C3
O_GLYCAN_BIOSYNTHESIS	O_GLYCAN_BIOSYNTHESIS	25	-0.314805	-0.764072	0.814935	0.955013	0.876944	2482	tags=20%, list=13%, signal=18%	GALNT3/GALNT4/GALNT16/GALNTL6/ST6GALNAC1
PROSTATE_CANCER	PROSTATE_CANCER	82	0.2497	0.84099	0.817857	0.955013	0.876944	3063	tags=21%, list=16%, signal=18%	CDKN1A/CCNE1/PDGFRA/CDK2/PIK3R5/E2F2/PDGFA/CCNE2/NFKBIA/NKX3-1/CREB3L1/E2F3/E2F1/PTEN/RELA/SOS1/NFKB1
GLYCOSPHINGOLIPID_BIOSYNTHESIS_GANGLIO_SERIES	GLYCOSPHINGOLIPID_BIOSYNTHESIS_GANGLIO_SERIES	15	0.305567	0.725841	0.823245	0.95537	0.877272	2757	tags=20%, list=14%, signal=17%	ST8SIA5/ST3GAL1/ST6GALNAC4
OXIDATIVE_PHOSPHORYLATION	OXIDATIVE_PHOSPHORYLATION	92	-0.267901	-0.812557	0.843455	0.972819	0.893294	6458	tags=24%, list=33%, signal=16%	NDUFC1/ATP6V1E1/LHPP/NDUFA11/SDHA/UQCR11/NDUFA4/COX8A/NDUFB1/NDUFA8/COX4I1/NDUFB7/NDUFV1/COX17/NDUFS7/COX7A1/NDUFS8/ATP6V0E2/COX4I2/COX6A2/ATP6V1C2/ATP12A
