# Supplementary material for: Integrated bulk and scRNA sequence identified anoikis-related diagnostic biomarkers and potential association with immune infiltration in type A aortic dissection
Source: Aging (Albany NY). 2023 Oct 24;15(20):11268–85. doi: 10.18632/aging.205126 (PMC10637813; doi:10.18632/aging.205126)
Supplement: Supplementary Table 7 [file aging-15-205126-s007.xlsx]

## Sheet: TableS7
Supplementary Table 7. 338 ARGs according to previous articles.
Anoikis-Related Gene Signature
BRMS1
PTK2
NTRK2
BCL2L11
SRC
CEACAM6
CAV1
AKT1
ITGB1
CEACAM5
EGFR
BCL2
CASP8
SIK1
PTRH2
STAT3
TLE1
DAPK2
CTNNB1
ZNF304
MAPK1
BMF
ITGA5
TP53
MCL1
BCL2L1
CASP3
CDH1
BAD
PIK3CA
PAK1
ITGAV
FN1
MAPK3
PTGS2
BAX
BCAR1
PTEN
ERBB2
ANGPTL4
PDK4
CYCS
BRAF
YAP1
ANKRD13C
ITGA2
ANXA5
BIRC5
MTOR
TIMP1
BDNF
CSPG4
BSG
AKT2
STK11
IGF1
IGF1R
ITGA6
ILK
CFLAR
RHOA
HIF1A
DAP3
MYBBP1A
TLE5
ITGA3
PTK2B
CCND1
CTTN
CALR
ATF4
CDCP1
PLAUR
SKP2
CHEK2
HGF
E2F1
EGF
PIK3CG
ITGB4
DAPK1
MAPK8
PIK3R1
PIK3R3
MAP2K1
CXCL12
LGALS3
FBXW7-AS1
BAK1
ABHD4
CD44
ITGA4
FADD
PHLDA2
TGFB1
HMCN1
MMP2
CEBPB
CEMIP
CDKN3
CBL
CASP9
SFN
MTDH
PRKCA
TNFRSF10B
CXCL8
MIR200C
AR
CDKN2A
CPT1A
PIK3CB
CLDN1
MIR204
MIR26A1
CDKN1A
CDKN1B
KLF12
NTRK1
PLAU
MYC
SMAD4
PLK1
MUC1
LGALS1
PYCARD
SESN2
ITGB3
KRAS
THBS1
BID
HRAS
CDK11B
CDK11A
XIAP
PPARG
IL6
MIR145
CCR7
MSLN
RAC1
GRHL2
BIRC3
NOTCH1
RHOG
CCAR2
NQO1
MMP13
FAS
MTA1
MYO5A
EDA2R
CCN6
MMP9
ABL1
MAPK11
SOD2
PTHLH
PDGFB
GLI2
EZH2
RIPK1
CXCR4
HMGA1
SIK2
TNFSF10
ANGPTL2
S100A4
NTF3
ETV4
MIR21
MIR124-1
HTRA1
LATS1
CEACAM3
EIF2AK3
LAMC2
LAMA3
LAMB3
CDH2
CSNK2A1
EDIL3
ZEB2
TLN1
EPHA2
SIRT3
OLFM3
CLU
SPINK1
CPEB2
NAT1
TSG101
MIR200A
MIR6744
SERPINA1
AKT3
RELA
TNFRSF1A
FASLG
AFP
ITGA8
NOX4
PBK
SATB1
CD63
EEF1A1
LTB4R2
MAVS
HRC
CCN2
RHOB
PPP1R13B
PLG
MET
RAF1
PARP1
PRKCQ
BRCA2
RB1
SP1
HAVCR2
DOCK1
VTN
INHBB
PDCD4
PRPF4B
RANBP9
SESN1
SESN3
CD24
ZBTB7A
MIR141
ELANE
KDR
MDM2
NFE2L2
ZEB1
KL
PRKCI
CRYAB
EPHB6
FGF2
HK2
LTF
IQGAP1
MGAT5
SDCBP
ABHD2
SPIB
TRIM31
MIR1827
PDGFRB
PLAT
TLR3
NRAS
ROCK1
PAK4
VEGFA
CASP10
PIN1
IL1RAP
UBE2C
YWHAZ
TWIST1
BMP6
BNIP3L
ELK1
KDM3A
PRDX4
BNIP3
LMO3
ZNF32
MIR200B
MIR525
MIR363
TUBB3
HSP90B1
SLC2A1
HMOX1
PTPN11
PRKACA
PAK3
CD36
PIK3R2
PPP2CA
CASP6
CDH3
EEF2K
LRP1
PAK2
PTK6
LPAR1
TCF7L2
CEACAM1
GDF2
GLO1
IL17A
RBL2
SIRPA
TRAF2
ADCY10
VPS37A
TNFRSF12A
APOBEC3G
BAG1
COL13A1
MNX1
RAD9A
IFI27
MEGF11
ITPRIP
BCL2L15
SNAI2
PTPN1
NOTCH3
GLUD1
SIRT1
FASN
MYH9
RPS6KB1
TPM1
PPP2R1A
COL4A2
CTNND1
CD151
MMP11
ARHGEF7
PPP2R2A
SEMA7A
PPP2R5A
BST2
CCN1
PPP2R2D
CCDC178
MIR10A
MIR30B
MIR30C1
SHC1
