# Supplementary material for: Integrated bulk and scRNA sequence identified anoikis-related diagnostic biomarkers and potential association with immune infiltration in type A aortic dissection
Source: Aging (Albany NY). 2023 Oct 24;15(20):11268–85. doi: 10.18632/aging.205126 (PMC10637813; doi:10.18632/aging.205126)
Supplement: Supplementary Table 8 [file aging-15-205126-s008.xlsx]

## Sheet: TableS8
Supplementary Table 8. Results of predicted miRNA of hub ARGs.
AverageShortestPathLength	BetweennessCentrality	ClosenessCentrality	ClusteringCoefficient	Degree	Eccentricity	group	IsSingleNode	name	NeighborhoodConnectivity	NumberOfDirectedEdges	NumberOfUndirectedEdges	PartnerOfMultiEdgedNodePairs	Radiality	selected	SelfLoops	shared name	Stress	TopologicalCoefficient
2.54103	0.0160057	0.393541	0	4	4	miRNA	FALSE	hsa-miR-182-5p	140.75	0	4	0	0.992591	FALSE	0	hsa-miR-182-5p	168118	0.296081
2.73708	0.13871	0.365353	0	83	3	mRNA	FALSE	CHEK2	1.78313	0	83	0	0.991649	FALSE	0	CHEK2	964054	0.111876
3.73556	0	0.267697	0	1	4	miRNA	FALSE	hsa-miR-2053	83	0	1	0	0.986848	FALSE	0	hsa-miR-2053	0	0
3.73556	0	0.267697	0	1	4	miRNA	FALSE	hsa-miR-513a-5p	83	0	1	0	0.986848	FALSE	0	hsa-miR-513a-5p	0	0
3.73556	0	0.267697	0	1	4	miRNA	FALSE	hsa-miR-4465	83	0	1	0	0.986848	FALSE	0	hsa-miR-4465	0	0
2.93009	0.00743227	0.341286	0	3	4	miRNA	FALSE	hsa-miR-26b-5p	131.667	0	3	0	0.990721	FALSE	0	hsa-miR-26b-5p	69016	0.378744
2.88146	0.00885938	0.347046	0	4	4	miRNA	FALSE	hsa-miR-26a-5p	108	0	4	0	0.990955	FALSE	0	hsa-miR-26a-5p	86198	0.297222
3.12766	0.00421574	0.319728	0	2	4	miRNA	FALSE	hsa-miR-1297	145.5	0	2	0	0.989771	FALSE	0	hsa-miR-1297	28670	0.514235
3.73556	0	0.267697	0	1	4	miRNA	FALSE	hsa-miR-8068	83	0	1	0	0.986848	FALSE	0	hsa-miR-8068	0	0
3.73556	0	0.267697	0	1	4	miRNA	FALSE	hsa-miR-5697	83	0	1	0	0.986848	FALSE	0	hsa-miR-5697	0	0
3.73556	0	0.267697	0	1	4	miRNA	FALSE	hsa-miR-6074	83	0	1	0	0.986848	FALSE	0	hsa-miR-6074	0	0
3.18237	0.00316634	0.314231	0	2	4	miRNA	FALSE	hsa-miR-5694	136	0	2	0	0.989508	FALSE	0	hsa-miR-5694	24764	0.513308
2.96353	0.00979622	0.337436	0	3	4	miRNA	FALSE	hsa-miR-383-5p	120.333	0	3	0	0.99056	FALSE	0	hsa-miR-383-5p	61938	0.357285
3.25228	0.00289751	0.307477	0	2	4	miRNA	FALSE	hsa-miR-376c-3p	125.5	0	2	0	0.989172	FALSE	0	hsa-miR-376c-3p	22200	0.51875
3.73556	0	0.267697	0	1	4	miRNA	FALSE	hsa-miR-595	83	0	1	0	0.986848	FALSE	0	hsa-miR-595	0	0
3.73556	0	0.267697	0	1	4	miRNA	FALSE	hsa-miR-4803	83	0	1	0	0.986848	FALSE	0	hsa-miR-4803	0	0
3.05775	0.00531852	0.327038	0	3	4	miRNA	FALSE	hsa-miR-27a-3p	118.333	0	3	0	0.990107	FALSE	0	hsa-miR-27a-3p	54800	0.387239
3.12766	0.00421574	0.319728	0	2	4	miRNA	FALSE	hsa-miR-3681-3p	145.5	0	2	0	0.989771	FALSE	0	hsa-miR-3681-3p	28670	0.514235
3.12766	0.00421574	0.319728	0	2	4	miRNA	FALSE	hsa-miR-216a-3p	145.5	0	2	0	0.989771	FALSE	0	hsa-miR-216a-3p	28670	0.514235
2.82371	0.00754481	0.354144	0	3	4	miRNA	FALSE	hsa-miR-27b-3p	146.667	0	3	0	0.991232	FALSE	0	hsa-miR-27b-3p	81986	0.383333
2.26748	0.0236044	0.441019	0	5	4	miRNA	FALSE	hsa-miR-128-3p	139.4	0	5	0	0.993906	FALSE	0	hsa-miR-128-3p	255980	0.246702
3.73556	0	0.267697	0	1	4	miRNA	FALSE	hsa-miR-4999-3p	83	0	1	0	0.986848	FALSE	0	hsa-miR-4999-3p	0	0
3.73556	0	0.267697	0	1	4	miRNA	FALSE	hsa-miR-7153-3p	83	0	1	0	0.986848	FALSE	0	hsa-miR-7153-3p	0	0
3.73556	0	0.267697	0	1	4	miRNA	FALSE	hsa-miR-3680-5p	83	0	1	0	0.986848	FALSE	0	hsa-miR-3680-5p	0	0
3.73556	0	0.267697	0	1	4	miRNA	FALSE	hsa-miR-2113	83	0	1	0	0.986848	FALSE	0	hsa-miR-2113	0	0
3.73556	0	0.267697	0	1	4	miRNA	FALSE	hsa-miR-548q	83	0	1	0	0.986848	FALSE	0	hsa-miR-548q	0	0
3.73556	0	0.267697	0	1	4	miRNA	FALSE	hsa-miR-548aw	83	0	1	0	0.986848	FALSE	0	hsa-miR-548aw	0	0
3.73556	0	0.267697	0	1	4	miRNA	FALSE	hsa-miR-1468-3p	83	0	1	0	0.986848	FALSE	0	hsa-miR-1468-3p	0	0
3.73556	0	0.267697	0	1	4	miRNA	FALSE	hsa-miR-548x-5p	83	0	1	0	0.986848	FALSE	0	hsa-miR-548x-5p	0	0
3.73556	0	0.267697	0	1	4	miRNA	FALSE	hsa-miR-548g-5p	83	0	1	0	0.986848	FALSE	0	hsa-miR-548g-5p	0	0
3.73556	0	0.267697	0	1	4	miRNA	FALSE	hsa-miR-548f-5p	83	0	1	0	0.986848	FALSE	0	hsa-miR-548f-5p	0	0
3.73556	0	0.267697	0	1	4	miRNA	FALSE	hsa-miR-548aj-5p	83	0	1	0	0.986848	FALSE	0	hsa-miR-548aj-5p	0	0
3.73556	0	0.267697	0	1	4	miRNA	FALSE	hsa-miR-5695	83	0	1	0	0.986848	FALSE	0	hsa-miR-5695	0	0
3.73556	0	0.267697	0	1	4	miRNA	FALSE	hsa-miR-3691-3p	83	0	1	0	0.986848	FALSE	0	hsa-miR-3691-3p	0	0
3.73556	0	0.267697	0	1	4	miRNA	FALSE	hsa-miR-6736-3p	83	0	1	0	0.986848	FALSE	0	hsa-miR-6736-3p	0	0
3.73556	0	0.267697	0	1	4	miRNA	FALSE	hsa-miR-454-3p	83	0	1	0	0.986848	FALSE	0	hsa-miR-454-3p	0	0
3.73556	0	0.267697	0	1	4	miRNA	FALSE	hsa-miR-4295	83	0	1	0	0.986848	FALSE	0	hsa-miR-4295	0	0
3.73556	0	0.267697	0	1	4	miRNA	FALSE	hsa-miR-3666	83	0	1	0	0.986848	FALSE	0	hsa-miR-3666	0	0
3.73556	0	0.267697	0	1	4	miRNA	FALSE	hsa-miR-301b-3p	83	0	1	0	0.986848	FALSE	0	hsa-miR-301b-3p	0	0
3.50152	0.000466929	0.28559	0	2	4	miRNA	FALSE	hsa-miR-301a-3p	93.5	0	2	0	0.987973	FALSE	0	hsa-miR-301a-3p	7758	0.585443
3.63222	0.000569683	0.275314	0	2	4	miRNA	FALSE	hsa-miR-130b-3p	60	0	2	0	0.987345	FALSE	0	hsa-miR-130b-3p	4368	0.513043
3.19757	0.00378252	0.312738	0	3	4	miRNA	FALSE	hsa-miR-130a-3p	96	0	3	0	0.989435	FALSE	0	hsa-miR-130a-3p	31986	0.36965
3.25228	0.00289751	0.307477	0	2	4	miRNA	FALSE	hsa-miR-519c-3p	125.5	0	2	0	0.989172	FALSE	0	hsa-miR-519c-3p	22200	0.51875
3.73556	0	0.267697	0	1	4	miRNA	FALSE	hsa-miR-519b-3p	83	0	1	0	0.986848	FALSE	0	hsa-miR-519b-3p	0	0
3.73556	0	0.267697	0	1	4	miRNA	FALSE	hsa-miR-519a-3p	83	0	1	0	0.986848	FALSE	0	hsa-miR-519a-3p	0	0
3.50152	0.000466929	0.28559	0	2	4	miRNA	FALSE	hsa-miR-559	93.5	0	2	0	0.987973	FALSE	0	hsa-miR-559	7758	0.585443
3.50152	0.000466929	0.28559	0	2	4	miRNA	FALSE	hsa-miR-548y	93.5	0	2	0	0.987973	FALSE	0	hsa-miR-548y	7758	0.585443
3.50152	0.000466929	0.28559	0	2	4	miRNA	FALSE	hsa-miR-548w	93.5	0	2	0	0.987973	FALSE	0	hsa-miR-548w	7758	0.585443
3.50152	0.000466929	0.28559	0	2	4	miRNA	FALSE	hsa-miR-548o-5p	93.5	0	2	0	0.987973	FALSE	0	hsa-miR-548o-5p	7758	0.585443
3.50152	0.000466929	0.28559	0	2	4	miRNA	FALSE	hsa-miR-548j-5p	93.5	0	2	0	0.987973	FALSE	0	hsa-miR-548j-5p	7758	0.585443
3.50152	0.000466929	0.28559	0	2	4	miRNA	FALSE	hsa-miR-548i	93.5	0	2	0	0.987973	FALSE	0	hsa-miR-548i	7758	0.585443
3.50152	0.000466929	0.28559	0	2	4	miRNA	FALSE	hsa-miR-548h-5p	93.5	0	2	0	0.987973	FALSE	0	hsa-miR-548h-5p	7758	0.585443
3.50152	0.000466929	0.28559	0	2	4	miRNA	FALSE	hsa-miR-548d-5p	93.5	0	2	0	0.987973	FALSE	0	hsa-miR-548d-5p	7758	0.585443
3.50152	0.000466929	0.28559	0	2	4	miRNA	FALSE	hsa-miR-548c-5p	93.5	0	2	0	0.987973	FALSE	0	hsa-miR-548c-5p	7758	0.585443
3.50152	0.000466929	0.28559	0	2	4	miRNA	FALSE	hsa-miR-548bb-5p	93.5	0	2	0	0.987973	FALSE	0	hsa-miR-548bb-5p	7758	0.585443
3.50152	0.000466929	0.28559	0	2	4	miRNA	FALSE	hsa-miR-548b-5p	93.5	0	2	0	0.987973	FALSE	0	hsa-miR-548b-5p	7758	0.585443
3.50152	0.000466929	0.28559	0	2	4	miRNA	FALSE	hsa-miR-548ay-5p	93.5	0	2	0	0.987973	FALSE	0	hsa-miR-548ay-5p	7758	0.585443
3.50152	0.000466929	0.28559	0	2	4	miRNA	FALSE	hsa-miR-548au-5p	93.5	0	2	0	0.987973	FALSE	0	hsa-miR-548au-5p	7758	0.585443
3.50152	0.000466929	0.28559	0	2	4	miRNA	FALSE	hsa-miR-548as-5p	93.5	0	2	0	0.987973	FALSE	0	hsa-miR-548as-5p	7758	0.585443
3.50152	0.000466929	0.28559	0	2	4	miRNA	FALSE	hsa-miR-548ar-5p	93.5	0	2	0	0.987973	FALSE	0	hsa-miR-548ar-5p	7758	0.585443
3.50152	0.000466929	0.28559	0	2	4	miRNA	FALSE	hsa-miR-548aq-5p	93.5	0	2	0	0.987973	FALSE	0	hsa-miR-548aq-5p	7758	0.585443
3.50152	0.000466929	0.28559	0	2	4	miRNA	FALSE	hsa-miR-548ap-5p	93.5	0	2	0	0.987973	FALSE	0	hsa-miR-548ap-5p	7758	0.585443
3.50152	0.000466929	0.28559	0	2	4	miRNA	FALSE	hsa-miR-548am-5p	93.5	0	2	0	0.987973	FALSE	0	hsa-miR-548am-5p	7758	0.585443
3.50152	0.000466929	0.28559	0	2	4	miRNA	FALSE	hsa-miR-548ak	93.5	0	2	0	0.987973	FALSE	0	hsa-miR-548ak	7758	0.585443
3.50152	0.000466929	0.28559	0	2	4	miRNA	FALSE	hsa-miR-548ae-5p	93.5	0	2	0	0.987973	FALSE	0	hsa-miR-548ae-5p	7758	0.585443
3.50152	0.000466929	0.28559	0	2	4	miRNA	FALSE	hsa-miR-548ad-5p	93.5	0	2	0	0.987973	FALSE	0	hsa-miR-548ad-5p	7758	0.585443
3.50152	0.000466929	0.28559	0	2	4	miRNA	FALSE	hsa-miR-548ab	93.5	0	2	0	0.987973	FALSE	0	hsa-miR-548ab	7758	0.585443
3.50152	0.000466929	0.28559	0	2	4	miRNA	FALSE	hsa-miR-548a-5p	93.5	0	2	0	0.987973	FALSE	0	hsa-miR-548a-5p	7758	0.585443
3.73556	0	0.267697	0	1	4	miRNA	FALSE	hsa-miR-548n	83	0	1	0	0.986848	FALSE	0	hsa-miR-548n	0	0
2.82371	0.00754481	0.354144	0	3	4	miRNA	FALSE	hsa-miR-19b-3p	146.667	0	3	0	0.991232	FALSE	0	hsa-miR-19b-3p	81986	0.383333
3.25228	0.00289751	0.307477	0	2	4	miRNA	FALSE	hsa-miR-19a-3p	125.5	0	2	0	0.989172	FALSE	0	hsa-miR-19a-3p	22200	0.51875
3.73556	0	0.267697	0	1	4	miRNA	FALSE	hsa-miR-3942-3p	83	0	1	0	0.986848	FALSE	0	hsa-miR-3942-3p	0	0
3.73556	0	0.267697	0	1	4	miRNA	FALSE	hsa-miR-4756-3p	83	0	1	0	0.986848	FALSE	0	hsa-miR-4756-3p	0	0
3.73556	0	0.267697	0	1	4	miRNA	FALSE	hsa-miR-3919	83	0	1	0	0.986848	FALSE	0	hsa-miR-3919	0	0
3.18237	0.00316634	0.314231	0	2	4	miRNA	FALSE	hsa-miR-205-3p	136	0	2	0	0.989508	FALSE	0	hsa-miR-205-3p	24764	0.513308
3.73556	0	0.267697	0	1	4	miRNA	FALSE	hsa-miR-5582-5p	83	0	1	0	0.986848	FALSE	0	hsa-miR-5582-5p	0	0
2.16109	0.0301639	0.462729	0	5	4	miRNA	FALSE	hsa-miR-124-3p	147.4	0	5	0	0.994418	FALSE	0	hsa-miR-124-3p	301806	0.245638
3.73556	0	0.267697	0	1	4	miRNA	FALSE	hsa-miR-548an	83	0	1	0	0.986848	FALSE	0	hsa-miR-548an	0	0
3.73556	0	0.267697	0	1	4	miRNA	FALSE	hsa-miR-30a-3p	83	0	1	0	0.986848	FALSE	0	hsa-miR-30a-3p	0	0
3.73556	0	0.267697	0	1	4	miRNA	FALSE	hsa-miR-30d-3p	83	0	1	0	0.986848	FALSE	0	hsa-miR-30d-3p	0	0
3.73556	0	0.267697	0	1	4	miRNA	FALSE	hsa-miR-30e-3p	83	0	1	0	0.986848	FALSE	0	hsa-miR-30e-3p	0	0
2.86322	0.0123128	0.349257	0	4	4	miRNA	FALSE	hsa-miR-129-2-3p	104.25	0	4	0	0.991042	FALSE	0	hsa-miR-129-2-3p	83704	0.282104
3.08511	0.00606594	0.324138	0	3	4	miRNA	FALSE	hsa-miR-205-5p	107	0	3	0	0.989975	FALSE	0	hsa-miR-205-5p	42420	0.360544
3.59271	0.00194733	0.278342	0	2	4	miRNA	FALSE	hsa-miR-212-3p	66	0	2	0	0.987535	FALSE	0	hsa-miR-212-3p	6760	0.507812
3.4772	0	0.287587	0	1	4	miRNA	FALSE	hsa-miR-17-92	168	0	1	0	0.98809	FALSE	0	hsa-miR-17-92	0	0
2.47872	0.327558	0.403433	0	168	3	mRNA	FALSE	HIF1A	1.77976	0	168	0	0.992891	FALSE	0	HIF1A	3878616	0.111395
2.28875	0.018344	0.436919	0	5	4	miRNA	FALSE	hsa-miR-20a-5p	143.6	0	5	0	0.993804	FALSE	0	hsa-miR-20a-5p	259280	0.257401
3.03647	0.00148097	0.329329	0	2	4	miRNA	FALSE	hsa-miR-20b-5p	178.5	0	2	0	0.990209	FALSE	0	hsa-miR-20b-5p	35022	0.57074
2.5076	0.00909382	0.398788	0	4	4	miRNA	FALSE	hsa-miR-107	150.5	0	4	0	0.992752	FALSE	0	hsa-miR-107	159138	0.309524
3.4772	0	0.287587	0	1	4	miRNA	FALSE	hsa-miR-18a-5p	168	0	1	0	0.98809	FALSE	0	hsa-miR-18a-5p	0	0
2.84498	0.00442365	0.351496	0	3	4	miRNA	FALSE	hsa-miR-17-5p	153.667	0	3	0	0.99113	FALSE	0	hsa-miR-17-5p	80500	0.409294
3.03647	0.00148097	0.329329	0	2	4	miRNA	FALSE	hsa-miR-424-5p	178.5	0	2	0	0.990209	FALSE	0	hsa-miR-424-5p	35022	0.57074
3.00304	0.00204069	0.332996	0	3	4	miRNA	FALSE	hsa-miR-199a-5p	131.333	0	3	0	0.99037	FALSE	0	hsa-miR-199a-5p	45264	0.406023
2.52888	0.00796132	0.395433	0	3	4	miRNA	FALSE	hsa-miR-138-5p	188.333	0	3	0	0.99265	FALSE	0	hsa-miR-138-5p	140254	0.392732
3.4772	0	0.287587	0	1	4	miRNA	FALSE	hsa-miR-199b-5p	168	0	1	0	0.98809	FALSE	0	hsa-miR-199b-5p	0	0
3.4772	0	0.287587	0	1	4	miRNA	FALSE	hsa-miR-33a-5p	168	0	1	0	0.98809	FALSE	0	hsa-miR-33a-5p	0	0
3.4772	0	0.287587	0	1	4	miRNA	FALSE	hsa-miR-106b-3p	168	0	1	0	0.98809	FALSE	0	hsa-miR-106b-3p	0	0
2.67781	0.0102545	0.373439	0	4	4	miRNA	FALSE	hsa-let-7b-5p	125.5	0	4	0	0.991934	FALSE	0	hsa-let-7b-5p	118712	0.291569
3.20365	0.00195409	0.312144	0	2	4	miRNA	FALSE	hsa-miR-210-3p	136	0	2	0	0.989406	FALSE	0	hsa-miR-210-3p	24842	0.527344
3.4772	0	0.287587	0	1	4	miRNA	FALSE	hsa-miR-3121-3p	168	0	1	0	0.98809	FALSE	0	hsa-miR-3121-3p	0	0
3.4772	0	0.287587	0	1	4	miRNA	FALSE	hsa-miR-3668	168	0	1	0	0.98809	FALSE	0	hsa-miR-3668	0	0
3.4772	0	0.287587	0	1	4	miRNA	FALSE	hsa-miR-6815-3p	168	0	1	0	0.98809	FALSE	0	hsa-miR-6815-3p	0	0
2.91489	0.00372184	0.343066	0	2	4	miRNA	FALSE	hsa-miR-589-3p	188	0	2	0	0.990794	FALSE	0	hsa-miR-589-3p	52060	0.532764
3.4772	0	0.287587	0	1	4	miRNA	FALSE	hsa-miR-889-3p	168	0	1	0	0.98809	FALSE	0	hsa-miR-889-3p	0	0
3.4772	0	0.287587	0	1	4	miRNA	FALSE	hsa-miR-935	168	0	1	0	0.98809	FALSE	0	hsa-miR-935	0	0
3.4772	0	0.287587	0	1	4	miRNA	FALSE	hsa-miR-1910-3p	168	0	1	0	0.98809	FALSE	0	hsa-miR-1910-3p	0	0
3.4772	0	0.287587	0	1	4	miRNA	FALSE	hsa-miR-3074-3p	168	0	1	0	0.98809	FALSE	0	hsa-miR-3074-3p	0	0
3.4772	0	0.287587	0	1	4	miRNA	FALSE	hsa-miR-5094	168	0	1	0	0.98809	FALSE	0	hsa-miR-5094	0	0
3.4772	0	0.287587	0	1	4	miRNA	FALSE	hsa-miR-6511a-5p	168	0	1	0	0.98809	FALSE	0	hsa-miR-6511a-5p	0	0
3.4772	0	0.287587	0	1	4	miRNA	FALSE	hsa-miR-6755-5p	168	0	1	0	0.98809	FALSE	0	hsa-miR-6755-5p	0	0
3.4772	0	0.287587	0	1	4	miRNA	FALSE	hsa-miR-6806-5p	168	0	1	0	0.98809	FALSE	0	hsa-miR-6806-5p	0	0
3.03647	0.00148097	0.329329	0	2	4	miRNA	FALSE	hsa-miR-93-5p	178.5	0	2	0	0.990209	FALSE	0	hsa-miR-93-5p	35022	0.57074
2.52888	0.00796132	0.395433	0	3	4	miRNA	FALSE	hsa-miR-106a-5p	188.333	0	3	0	0.99265	FALSE	0	hsa-miR-106a-5p	140254	0.392732
3.03647	0.00148097	0.329329	0	2	4	miRNA	FALSE	hsa-miR-106b-5p	178.5	0	2	0	0.990209	FALSE	0	hsa-miR-106b-5p	35022	0.57074
3.4772	0	0.287587	0	1	4	miRNA	FALSE	hsa-miR-519d-3p	168	0	1	0	0.98809	FALSE	0	hsa-miR-519d-3p	0	0
3.4772	0	0.287587	0	1	4	miRNA	FALSE	hsa-miR-4282	168	0	1	0	0.98809	FALSE	0	hsa-miR-4282	0	0
3.4772	0	0.287587	0	1	4	miRNA	FALSE	hsa-miR-8055	168	0	1	0	0.98809	FALSE	0	hsa-miR-8055	0	0
3.4772	0	0.287587	0	1	4	miRNA	FALSE	hsa-miR-153-5p	168	0	1	0	0.98809	FALSE	0	hsa-miR-153-5p	0	0
3.4772	0	0.287587	0	1	4	miRNA	FALSE	hsa-miR-18b-5p	168	0	1	0	0.98809	FALSE	0	hsa-miR-18b-5p	0	0
3.03647	0.00148097	0.329329	0	2	4	miRNA	FALSE	hsa-miR-3662	178.5	0	2	0	0.990209	FALSE	0	hsa-miR-3662	35022	0.57074
3.4772	0	0.287587	0	1	4	miRNA	FALSE	hsa-miR-4735-3p	168	0	1	0	0.98809	FALSE	0	hsa-miR-4735-3p	0	0
3.4772	0	0.287587	0	1	4	miRNA	FALSE	hsa-miR-576-3p	168	0	1	0	0.98809	FALSE	0	hsa-miR-576-3p	0	0
3.4772	0	0.287587	0	1	4	miRNA	FALSE	hsa-miR-151a-3p	168	0	1	0	0.98809	FALSE	0	hsa-miR-151a-3p	0	0
3.4772	0	0.287587	0	1	4	miRNA	FALSE	hsa-miR-5681b	168	0	1	0	0.98809	FALSE	0	hsa-miR-5681b	0	0
2.33739	0.0169308	0.427828	0	5	4	miRNA	FALSE	hsa-miR-155-5p	138.2	0	5	0	0.99357	FALSE	0	hsa-miR-155-5p	235834	0.255019
3.03647	0.00148097	0.329329	0	2	4	miRNA	FALSE	hsa-miR-5692a	178.5	0	2	0	0.990209	FALSE	0	hsa-miR-5692a	35022	0.57074
3.23708	0.00312735	0.30892	0	2	4	miRNA	FALSE	hsa-miR-22-3p	128.5	0	2	0	0.989245	FALSE	0	hsa-miR-22-3p	23638	0.520408
3.00304	0.00204069	0.332996	0	3	4	miRNA	FALSE	hsa-miR-21-5p	131.333	0	3	0	0.99037	FALSE	0	hsa-miR-21-5p	45264	0.406023
3.4772	0	0.287587	0	1	4	miRNA	FALSE	hsa-miR-5089-3p	168	0	1	0	0.98809	FALSE	0	hsa-miR-5089-3p	0	0
3.4772	0	0.287587	0	1	4	miRNA	FALSE	hsa-miR-4662a-5p	168	0	1	0	0.98809	FALSE	0	hsa-miR-4662a-5p	0	0
3.4772	0	0.287587	0	1	4	miRNA	FALSE	hsa-miR-1322	168	0	1	0	0.98809	FALSE	0	hsa-miR-1322	0	0
3.4772	0	0.287587	0	1	4	miRNA	FALSE	hsa-miR-509-5p	168	0	1	0	0.98809	FALSE	0	hsa-miR-509-5p	0	0
3.4772	0	0.287587	0	1	4	miRNA	FALSE	hsa-miR-509-3-5p	168	0	1	0	0.98809	FALSE	0	hsa-miR-509-3-5p	0	0
3.4772	0	0.287587	0	1	4	miRNA	FALSE	hsa-miR-4418	168	0	1	0	0.98809	FALSE	0	hsa-miR-4418	0	0
3.4772	0	0.287587	0	1	4	miRNA	FALSE	hsa-miR-6807-3p	168	0	1	0	0.98809	FALSE	0	hsa-miR-6807-3p	0	0
3.4772	0	0.287587	0	1	4	miRNA	FALSE	hsa-miR-217	168	0	1	0	0.98809	FALSE	0	hsa-miR-217	0	0
3.4772	0	0.287587	0	1	4	miRNA	FALSE	hsa-miR-4799-5p	168	0	1	0	0.98809	FALSE	0	hsa-miR-4799-5p	0	0
3.4772	0	0.287587	0	1	4	miRNA	FALSE	hsa-miR-4463	168	0	1	0	0.98809	FALSE	0	hsa-miR-4463	0	0
3.4772	0	0.287587	0	1	4	miRNA	FALSE	hsa-miR-4499	168	0	1	0	0.98809	FALSE	0	hsa-miR-4499	0	0
3.4772	0	0.287587	0	1	4	miRNA	FALSE	hsa-miR-329-5p	168	0	1	0	0.98809	FALSE	0	hsa-miR-329-5p	0	0
3.4772	0	0.287587	0	1	4	miRNA	FALSE	hsa-miR-4748	168	0	1	0	0.98809	FALSE	0	hsa-miR-4748	0	0
3.4772	0	0.287587	0	1	4	miRNA	FALSE	hsa-miR-4464	168	0	1	0	0.98809	FALSE	0	hsa-miR-4464	0	0
3.4772	0	0.287587	0	1	4	miRNA	FALSE	hsa-miR-449c-5p	168	0	1	0	0.98809	FALSE	0	hsa-miR-449c-5p	0	0
3.03647	0.00148097	0.329329	0	2	4	miRNA	FALSE	hsa-miR-34b-5p	178.5	0	2	0	0.990209	FALSE	0	hsa-miR-34b-5p	35022	0.57074
3.4772	0	0.287587	0	1	4	miRNA	FALSE	hsa-miR-2682-5p	168	0	1	0	0.98809	FALSE	0	hsa-miR-2682-5p	0	0
3.35258	0.00158232	0.298277	0	2	4	miRNA	FALSE	hsa-miR-940	108.5	0	2	0	0.98869	FALSE	0	hsa-miR-940	11964	0.519324
3.4772	0	0.287587	0	1	4	miRNA	FALSE	hsa-miR-6893-5p	168	0	1	0	0.98809	FALSE	0	hsa-miR-6893-5p	0	0
3.4772	0	0.287587	0	1	4	miRNA	FALSE	hsa-miR-6808-5p	168	0	1	0	0.98809	FALSE	0	hsa-miR-6808-5p	0	0
3.4772	0	0.287587	0	1	4	miRNA	FALSE	hsa-miR-106a-3p	168	0	1	0	0.98809	FALSE	0	hsa-miR-106a-3p	0	0
3.4772	0	0.287587	0	1	4	miRNA	FALSE	hsa-miR-299-5p	168	0	1	0	0.98809	FALSE	0	hsa-miR-299-5p	0	0
3.4772	0	0.287587	0	1	4	miRNA	FALSE	hsa-miR-4470	168	0	1	0	0.98809	FALSE	0	hsa-miR-4470	0	0
3.4772	0	0.287587	0	1	4	miRNA	FALSE	hsa-miR-4487	168	0	1	0	0.98809	FALSE	0	hsa-miR-4487	0	0
3.4772	0	0.287587	0	1	4	miRNA	FALSE	hsa-miR-558	168	0	1	0	0.98809	FALSE	0	hsa-miR-558	0	0
3.4772	0	0.287587	0	1	4	miRNA	FALSE	hsa-miR-3160-3p	168	0	1	0	0.98809	FALSE	0	hsa-miR-3160-3p	0	0
3.4772	0	0.287587	0	1	4	miRNA	FALSE	hsa-miR-3128	168	0	1	0	0.98809	FALSE	0	hsa-miR-3128	0	0
3.4772	0	0.287587	0	1	4	miRNA	FALSE	hsa-miR-625-3p	168	0	1	0	0.98809	FALSE	0	hsa-miR-625-3p	0	0
3.4772	0	0.287587	0	1	4	miRNA	FALSE	hsa-miR-548ah-5p	168	0	1	0	0.98809	FALSE	0	hsa-miR-548ah-5p	0	0
3.4772	0	0.287587	0	1	4	miRNA	FALSE	hsa-miR-3609	168	0	1	0	0.98809	FALSE	0	hsa-miR-3609	0	0
3.4772	0	0.287587	0	1	4	miRNA	FALSE	hsa-miR-494-3p	168	0	1	0	0.98809	FALSE	0	hsa-miR-494-3p	0	0
3.4772	0	0.287587	0	1	4	miRNA	FALSE	hsa-miR-142-5p	168	0	1	0	0.98809	FALSE	0	hsa-miR-142-5p	0	0
3.4772	0	0.287587	0	1	4	miRNA	FALSE	hsa-miR-433-3p	168	0	1	0	0.98809	FALSE	0	hsa-miR-433-3p	0	0
2.82371	0.00680076	0.354144	0	3	4	miRNA	FALSE	hsa-miR-429	148.667	0	3	0	0.991232	FALSE	0	hsa-miR-429	82764	0.388596
2.52888	0.00796132	0.395433	0	3	4	miRNA	FALSE	hsa-miR-338-3p	188.333	0	3	0	0.99265	FALSE	0	hsa-miR-338-3p	140254	0.392732
3.03647	0.00148097	0.329329	0	2	4	miRNA	FALSE	hsa-miR-186-5p	178.5	0	2	0	0.990209	FALSE	0	hsa-miR-186-5p	35022	0.57074
3.4772	0	0.287587	0	1	4	miRNA	FALSE	hsa-miR-138-1-3p	168	0	1	0	0.98809	FALSE	0	hsa-miR-138-1-3p	0	0
2.43769	0.0127375	0.410224	0	5	4	miRNA	FALSE	hsa-miR-145-5p	130.2	0	5	0	0.993088	FALSE	0	hsa-miR-145-5p	194626	0.255842
3.4772	0	0.287587	0	1	4	miRNA	FALSE	hsa-miR-200c-5p	168	0	1	0	0.98809	FALSE	0	hsa-miR-200c-5p	0	0
3.4772	0	0.287587	0	1	4	miRNA	FALSE	hsa-miR-497-3p	168	0	1	0	0.98809	FALSE	0	hsa-miR-497-3p	0	0
2.91489	0.00372184	0.343066	0	2	4	miRNA	FALSE	hsa-let-7d-5p	188	0	2	0	0.990794	FALSE	0	hsa-let-7d-5p	52060	0.532764
3.4772	0	0.287587	0	1	4	miRNA	FALSE	hsa-miR-100-3p	168	0	1	0	0.98809	FALSE	0	hsa-miR-100-3p	0	0
3.4772	0	0.287587	0	1	4	miRNA	FALSE	hsa-miR-10a-5p	168	0	1	0	0.98809	FALSE	0	hsa-miR-10a-5p	0	0
3.4772	0	0.287587	0	1	4	miRNA	FALSE	hsa-miR-10b-3p	168	0	1	0	0.98809	FALSE	0	hsa-miR-10b-3p	0	0
3.41337	0.000315331	0.292965	0	2	4	miRNA	FALSE	hsa-miR-10b-5p	102.5	0	2	0	0.988397	FALSE	0	hsa-miR-10b-5p	5418	0.542781
3.4772	0	0.287587	0	1	4	miRNA	FALSE	hsa-miR-1260a	168	0	1	0	0.98809	FALSE	0	hsa-miR-1260a	0	0
3.4772	0	0.287587	0	1	4	miRNA	FALSE	hsa-miR-1260b	168	0	1	0	0.98809	FALSE	0	hsa-miR-1260b	0	0
3.4772	0	0.287587	0	1	4	miRNA	FALSE	hsa-miR-1276	168	0	1	0	0.98809	FALSE	0	hsa-miR-1276	0	0
3.03647	0.00148097	0.329329	0	2	4	miRNA	FALSE	hsa-miR-1277-5p	178.5	0	2	0	0.990209	FALSE	0	hsa-miR-1277-5p	35022	0.57074
3.03647	0.00148097	0.329329	0	2	4	miRNA	FALSE	hsa-miR-140-5p	178.5	0	2	0	0.990209	FALSE	0	hsa-miR-140-5p	35022	0.57074
3.4772	0	0.287587	0	1	4	miRNA	FALSE	hsa-miR-146a-3p	168	0	1	0	0.98809	FALSE	0	hsa-miR-146a-3p	0	0
2.61398	0.0130896	0.382558	0	5	4	miRNA	FALSE	hsa-miR-148a-3p	117.4	0	5	0	0.99224	FALSE	0	hsa-miR-148a-3p	161164	0.260403
3.18541	0.00379411	0.313931	0	3	4	miRNA	FALSE	hsa-miR-148b-3p	98	0	3	0	0.989493	FALSE	0	hsa-miR-148b-3p	32904	0.371648
3.03647	0.00148097	0.329329	0	2	4	miRNA	FALSE	hsa-miR-16-1-3p	178.5	0	2	0	0.990209	FALSE	0	hsa-miR-16-1-3p	35022	0.57074
3.4772	0	0.287587	0	1	4	miRNA	FALSE	hsa-miR-16-2-3p	168	0	1	0	0.98809	FALSE	0	hsa-miR-16-2-3p	0	0
3.20365	0.00195409	0.312144	0	2	4	miRNA	FALSE	hsa-miR-183-5p	136	0	2	0	0.989406	FALSE	0	hsa-miR-183-5p	24842	0.527344
2.91489	0.00372184	0.343066	0	2	4	miRNA	FALSE	hsa-miR-193a-3p	188	0	2	0	0.990794	FALSE	0	hsa-miR-193a-3p	52060	0.532764
3.4772	0	0.287587	0	1	4	miRNA	FALSE	hsa-miR-193b-3p	168	0	1	0	0.98809	FALSE	0	hsa-miR-193b-3p	0	0
2.91489	0.00372184	0.343066	0	2	4	miRNA	FALSE	hsa-miR-196a-5p	188	0	2	0	0.990794	FALSE	0	hsa-miR-196a-5p	52060	0.532764
2.91489	0.00372184	0.343066	0	2	4	miRNA	FALSE	hsa-miR-196b-5p	188	0	2	0	0.990794	FALSE	0	hsa-miR-196b-5p	52060	0.532764
2.52888	0.00796132	0.395433	0	3	4	miRNA	FALSE	hsa-miR-218-5p	188.333	0	3	0	0.99265	FALSE	0	hsa-miR-218-5p	140254	0.392732
3.4772	0	0.287587	0	1	4	miRNA	FALSE	hsa-miR-22-5p	168	0	1	0	0.98809	FALSE	0	hsa-miR-22-5p	0	0
3.4772	0	0.287587	0	1	4	miRNA	FALSE	hsa-miR-23a-3p	168	0	1	0	0.98809	FALSE	0	hsa-miR-23a-3p	0	0
2.18845	0.0232895	0.456944	0	5	4	miRNA	FALSE	hsa-miR-23b-3p	151.6	0	5	0	0.994286	FALSE	0	hsa-miR-23b-3p	305828	0.256559
3.4772	0	0.287587	0	1	4	miRNA	FALSE	hsa-miR-23b-5p	168	0	1	0	0.98809	FALSE	0	hsa-miR-23b-5p	0	0
3.4772	0	0.287587	0	1	4	miRNA	FALSE	hsa-miR-23c	168	0	1	0	0.98809	FALSE	0	hsa-miR-23c	0	0
3.03647	0.00148097	0.329329	0	2	4	miRNA	FALSE	hsa-miR-299-3p	178.5	0	2	0	0.990209	FALSE	0	hsa-miR-299-3p	35022	0.57074
3.03647	0.00148097	0.329329	0	2	4	miRNA	FALSE	hsa-miR-29a-3p	178.5	0	2	0	0.990209	FALSE	0	hsa-miR-29a-3p	35022	0.57074
3.4772	0	0.287587	0	1	4	miRNA	FALSE	hsa-miR-29a-5p	168	0	1	0	0.98809	FALSE	0	hsa-miR-29a-5p	0	0
3.03647	0.00148097	0.329329	0	2	4	miRNA	FALSE	hsa-miR-29b-3p	178.5	0	2	0	0.990209	FALSE	0	hsa-miR-29b-3p	35022	0.57074
3.03647	0.00148097	0.329329	0	2	4	miRNA	FALSE	hsa-miR-29c-3p	178.5	0	2	0	0.990209	FALSE	0	hsa-miR-29c-3p	35022	0.57074
3.4772	0	0.287587	0	1	4	miRNA	FALSE	hsa-miR-31-5p	168	0	1	0	0.98809	FALSE	0	hsa-miR-31-5p	0	0
3.4772	0	0.287587	0	1	4	miRNA	FALSE	hsa-miR-32-3p	168	0	1	0	0.98809	FALSE	0	hsa-miR-32-3p	0	0
3.4772	0	0.287587	0	1	4	miRNA	FALSE	hsa-miR-324-5p	168	0	1	0	0.98809	FALSE	0	hsa-miR-324-5p	0	0
3.4772	0	0.287587	0	1	4	miRNA	FALSE	hsa-miR-325	168	0	1	0	0.98809	FALSE	0	hsa-miR-325	0	0
3.4772	0	0.287587	0	1	4	miRNA	FALSE	hsa-miR-337-5p	168	0	1	0	0.98809	FALSE	0	hsa-miR-337-5p	0	0
3.4772	0	0.287587	0	1	4	miRNA	FALSE	hsa-miR-342-5p	168	0	1	0	0.98809	FALSE	0	hsa-miR-342-5p	0	0
2.28875	0.0199139	0.436919	0	5	4	miRNA	FALSE	hsa-miR-34a-5p	140.6	0	5	0	0.993804	FALSE	0	hsa-miR-34a-5p	252724	0.251986
3.41337	0.000315331	0.292965	0	2	4	miRNA	FALSE	hsa-miR-3613-3p	102.5	0	2	0	0.988397	FALSE	0	hsa-miR-3613-3p	5418	0.542781
3.4772	0	0.287587	0	1	4	miRNA	FALSE	hsa-miR-370-3p	168	0	1	0	0.98809	FALSE	0	hsa-miR-370-3p	0	0
2.52888	0.00796132	0.395433	0	3	4	miRNA	FALSE	hsa-miR-373-3p	188.333	0	3	0	0.99265	FALSE	0	hsa-miR-373-3p	140254	0.392732
2.81763	0.00526801	0.354908	0	4	4	miRNA	FALSE	hsa-miR-375	124.5	0	4	0	0.991261	FALSE	0	hsa-miR-375	94914	0.324147
3.4772	0	0.287587	0	1	4	miRNA	FALSE	hsa-miR-376a-3p	168	0	1	0	0.98809	FALSE	0	hsa-miR-376a-3p	0	0
3.4772	0	0.287587	0	1	4	miRNA	FALSE	hsa-miR-376b-3p	168	0	1	0	0.98809	FALSE	0	hsa-miR-376b-3p	0	0
3.4772	0	0.287587	0	1	4	miRNA	FALSE	hsa-miR-377-3p	168	0	1	0	0.98809	FALSE	0	hsa-miR-377-3p	0	0
3.4772	0	0.287587	0	1	4	miRNA	FALSE	hsa-miR-382-5p	168	0	1	0	0.98809	FALSE	0	hsa-miR-382-5p	0	0
3.4772	0	0.287587	0	1	4	miRNA	FALSE	hsa-miR-3909	168	0	1	0	0.98809	FALSE	0	hsa-miR-3909	0	0
3.03647	0.00148097	0.329329	0	2	4	miRNA	FALSE	hsa-miR-410-3p	178.5	0	2	0	0.990209	FALSE	0	hsa-miR-410-3p	35022	0.57074
3.4772	0	0.287587	0	1	4	miRNA	FALSE	hsa-miR-412-3p	168	0	1	0	0.98809	FALSE	0	hsa-miR-412-3p	0	0
3.20365	0.00195409	0.312144	0	2	4	miRNA	FALSE	hsa-miR-485-5p	136	0	2	0	0.989406	FALSE	0	hsa-miR-485-5p	24842	0.527344
3.4772	0	0.287587	0	1	4	miRNA	FALSE	hsa-miR-501-3p	168	0	1	0	0.98809	FALSE	0	hsa-miR-501-3p	0	0
3.4772	0	0.287587	0	1	4	miRNA	FALSE	hsa-miR-502-3p	168	0	1	0	0.98809	FALSE	0	hsa-miR-502-3p	0	0
3.03647	0.00148097	0.329329	0	2	4	miRNA	FALSE	hsa-miR-518c-5p	178.5	0	2	0	0.990209	FALSE	0	hsa-miR-518c-5p	35022	0.57074
3.4772	0	0.287587	0	1	4	miRNA	FALSE	hsa-miR-548d-3p	168	0	1	0	0.98809	FALSE	0	hsa-miR-548d-3p	0	0
3.4772	0	0.287587	0	1	4	miRNA	FALSE	hsa-miR-548h-3p	168	0	1	0	0.98809	FALSE	0	hsa-miR-548h-3p	0	0
3.4772	0	0.287587	0	1	4	miRNA	FALSE	hsa-miR-548o-3p	168	0	1	0	0.98809	FALSE	0	hsa-miR-548o-3p	0	0
3.4772	0	0.287587	0	1	4	miRNA	FALSE	hsa-miR-548z	168	0	1	0	0.98809	FALSE	0	hsa-miR-548z	0	0
3.4772	0	0.287587	0	1	4	miRNA	FALSE	hsa-miR-575	168	0	1	0	0.98809	FALSE	0	hsa-miR-575	0	0
3.4772	0	0.287587	0	1	4	miRNA	FALSE	hsa-miR-580-3p	168	0	1	0	0.98809	FALSE	0	hsa-miR-580-3p	0	0
2.91489	0.00372184	0.343066	0	2	4	miRNA	FALSE	hsa-miR-583	188	0	2	0	0.990794	FALSE	0	hsa-miR-583	52060	0.532764
3.20365	0.00195409	0.312144	0	2	4	miRNA	FALSE	hsa-miR-587	136	0	2	0	0.989406	FALSE	0	hsa-miR-587	24842	0.527344
3.03647	0.00148097	0.329329	0	2	4	miRNA	FALSE	hsa-miR-590-3p	178.5	0	2	0	0.990209	FALSE	0	hsa-miR-590-3p	35022	0.57074
3.4772	0	0.287587	0	1	4	miRNA	FALSE	hsa-miR-616-5p	168	0	1	0	0.98809	FALSE	0	hsa-miR-616-5p	0	0
3.4772	0	0.287587	0	1	4	miRNA	FALSE	hsa-miR-647	168	0	1	0	0.98809	FALSE	0	hsa-miR-647	0	0
3.20365	0.00195409	0.312144	0	2	4	miRNA	FALSE	hsa-miR-659-3p	136	0	2	0	0.989406	FALSE	0	hsa-miR-659-3p	24842	0.527344
3.4772	0	0.287587	0	1	4	miRNA	FALSE	hsa-miR-93-3p	168	0	1	0	0.98809	FALSE	0	hsa-miR-93-3p	0	0
3.03647	0.00148097	0.329329	0	2	4	miRNA	FALSE	hsa-miR-9-5p	178.5	0	2	0	0.990209	FALSE	0	hsa-miR-9-5p	35022	0.57074
3.4772	0	0.287587	0	1	4	miRNA	FALSE	hsa-miR-96-5p	168	0	1	0	0.98809	FALSE	0	hsa-miR-96-5p	0	0
2.10334	0.0310269	0.475434	0	7	4	miRNA	FALSE	hsa-miR-1-3p	120.571	0	7	0	0.994695	FALSE	0	hsa-miR-1-3p	382138	0.195059
2.43769	0.0127375	0.410224	0	5	4	miRNA	FALSE	hsa-miR-16-5p	130.2	0	5	0	0.993088	FALSE	0	hsa-miR-16-5p	194626	0.255842
2.43769	0.0127375	0.410224	0	5	4	miRNA	FALSE	hsa-miR-195-5p	130.2	0	5	0	0.993088	FALSE	0	hsa-miR-195-5p	194626	0.255842
3.15198	0.00255406	0.317261	0	3	4	miRNA	FALSE	hsa-miR-27a-5p	103	0	3	0	0.989654	FALSE	0	hsa-miR-27a-5p	34432	0.375
3.4772	0	0.287587	0	1	4	miRNA	FALSE	hsa-miR-664a-3p	168	0	1	0	0.98809	FALSE	0	hsa-miR-664a-3p	0	0
2.5228	0.0181768	0.396386	0	6	4	miRNA	FALSE	hsa-miR-374a-5p	106	0	6	0	0.992679	FALSE	0	hsa-miR-374a-5p	200098	0.220588
3.03647	0.00148097	0.329329	0	2	4	miRNA	FALSE	hsa-miR-133a-3p	178.5	0	2	0	0.990209	FALSE	0	hsa-miR-133a-3p	35022	0.57074
2.67325	0.162932	0.374076	0	104	3	mRNA	FALSE	PTPN1	2.09615	0	104	0	0.991956	FALSE	0	PTPN1	1957510	0.156593
3.67173	0	0.272351	0	1	4	miRNA	FALSE	hsa-miR-122-5p	104	0	1	0	0.987155	FALSE	0	hsa-miR-122-5p	0	0
3.19757	0.000988595	0.312738	0	2	4	miRNA	FALSE	hsa-miR-362-3p	146.5	0	2	0	0.989435	FALSE	0	hsa-miR-362-3p	20636	0.563953
3.19757	0.000988595	0.312738	0	2	4	miRNA	FALSE	hsa-miR-1293	146.5	0	2	0	0.989435	FALSE	0	hsa-miR-1293	20636	0.563953
3.19757	0.000988595	0.312738	0	2	4	miRNA	FALSE	hsa-miR-194-3p	146.5	0	2	0	0.989435	FALSE	0	hsa-miR-194-3p	20636	0.563953
3.67173	0	0.272351	0	1	4	miRNA	FALSE	hsa-miR-3150b-3p	104	0	1	0	0.987155	FALSE	0	hsa-miR-3150b-3p	0	0
3.19757	0.000988595	0.312738	0	2	4	miRNA	FALSE	hsa-miR-363-5p	146.5	0	2	0	0.989435	FALSE	0	hsa-miR-363-5p	20636	0.563953
3.67173	0	0.272351	0	1	4	miRNA	FALSE	hsa-miR-3689d	104	0	1	0	0.987155	FALSE	0	hsa-miR-3689d	0	0
3.67173	0	0.272351	0	1	4	miRNA	FALSE	hsa-miR-3973	104	0	1	0	0.987155	FALSE	0	hsa-miR-3973	0	0
3.19757	0.000988595	0.312738	0	2	4	miRNA	FALSE	hsa-miR-4483	146.5	0	2	0	0.989435	FALSE	0	hsa-miR-4483	20636	0.563953
3.67173	0	0.272351	0	1	4	miRNA	FALSE	hsa-miR-4784	104	0	1	0	0.987155	FALSE	0	hsa-miR-4784	0	0
3.67173	0	0.272351	0	1	4	miRNA	FALSE	hsa-miR-6134	104	0	1	0	0.987155	FALSE	0	hsa-miR-6134	0	0
3.19757	0.000988595	0.312738	0	2	4	miRNA	FALSE	hsa-miR-6745	146.5	0	2	0	0.989435	FALSE	0	hsa-miR-6745	20636	0.563953
3.19757	0.000988595	0.312738	0	2	4	miRNA	FALSE	hsa-miR-6748-5p	146.5	0	2	0	0.989435	FALSE	0	hsa-miR-6748-5p	20636	0.563953
3.19757	0.000988595	0.312738	0	2	4	miRNA	FALSE	hsa-miR-6756-5p	146.5	0	2	0	0.989435	FALSE	0	hsa-miR-6756-5p	20636	0.563953
3.19757	0.000988595	0.312738	0	2	4	miRNA	FALSE	hsa-miR-6766-5p	146.5	0	2	0	0.989435	FALSE	0	hsa-miR-6766-5p	20636	0.563953
3.67173	0	0.272351	0	1	4	miRNA	FALSE	hsa-miR-6851-5p	104	0	1	0	0.987155	FALSE	0	hsa-miR-6851-5p	0	0
3.67173	0	0.272351	0	1	4	miRNA	FALSE	hsa-miR-6880-5p	104	0	1	0	0.987155	FALSE	0	hsa-miR-6880-5p	0	0
3.67173	0	0.272351	0	1	4	miRNA	FALSE	hsa-miR-7847-3p	104	0	1	0	0.987155	FALSE	0	hsa-miR-7847-3p	0	0
3.08207	0.00274961	0.324458	0	2	4	miRNA	FALSE	hsa-let-7e-5p	156	0	2	0	0.98999	FALSE	0	hsa-let-7e-5p	32588	0.523649
3.67173	0	0.272351	0	1	4	miRNA	FALSE	hsa-let-7g-3p	104	0	1	0	0.987155	FALSE	0	hsa-let-7g-3p	0	0
3.19757	0.000988595	0.312738	0	2	4	miRNA	FALSE	hsa-miR-101-3p	146.5	0	2	0	0.989435	FALSE	0	hsa-miR-101-3p	20636	0.563953
3.09726	0.00321506	0.322866	0	3	4	miRNA	FALSE	hsa-miR-126-5p	114	0	3	0	0.989917	FALSE	0	hsa-miR-126-5p	39160	0.389655
3.67173	0	0.272351	0	1	4	miRNA	FALSE	hsa-miR-135b-5p	104	0	1	0	0.987155	FALSE	0	hsa-miR-135b-5p	0	0
3.08207	0.00274961	0.324458	0	2	4	miRNA	FALSE	hsa-miR-140-3p	156	0	2	0	0.98999	FALSE	0	hsa-miR-140-3p	32588	0.523649
3.19757	0.000988595	0.312738	0	2	4	miRNA	FALSE	hsa-miR-152-3p	146.5	0	2	0	0.989435	FALSE	0	hsa-miR-152-3p	20636	0.563953
3.67173	0	0.272351	0	1	4	miRNA	FALSE	hsa-miR-192-5p	104	0	1	0	0.987155	FALSE	0	hsa-miR-192-5p	0	0
3.67173	0	0.272351	0	1	4	miRNA	FALSE	hsa-miR-198	104	0	1	0	0.987155	FALSE	0	hsa-miR-198	0	0
3.19757	0.000988595	0.312738	0	2	4	miRNA	FALSE	hsa-miR-203a-3p	146.5	0	2	0	0.989435	FALSE	0	hsa-miR-203a-3p	20636	0.563953
3.67173	0	0.272351	0	1	4	miRNA	FALSE	hsa-miR-204-5p	104	0	1	0	0.987155	FALSE	0	hsa-miR-204-5p	0	0
3.67173	0	0.272351	0	1	4	miRNA	FALSE	hsa-miR-211-5p	104	0	1	0	0.987155	FALSE	0	hsa-miR-211-5p	0	0
3.67173	0	0.272351	0	1	4	miRNA	FALSE	hsa-miR-218-2-3p	104	0	1	0	0.987155	FALSE	0	hsa-miR-218-2-3p	0	0
3.67173	0	0.272351	0	1	4	miRNA	FALSE	hsa-miR-221-5p	104	0	1	0	0.987155	FALSE	0	hsa-miR-221-5p	0	0
3.19757	0.000988595	0.312738	0	2	4	miRNA	FALSE	hsa-miR-30a-5p	146.5	0	2	0	0.989435	FALSE	0	hsa-miR-30a-5p	20636	0.563953
3.08207	0.00274961	0.324458	0	2	4	miRNA	FALSE	hsa-miR-30b-3p	156	0	2	0	0.98999	FALSE	0	hsa-miR-30b-3p	32588	0.523649
3.67173	0	0.272351	0	1	4	miRNA	FALSE	hsa-miR-30b-5p	104	0	1	0	0.987155	FALSE	0	hsa-miR-30b-5p	0	0
2.68997	0.00649672	0.371751	0	3	4	miRNA	FALSE	hsa-miR-30c-5p	167	0	3	0	0.991875	FALSE	0	hsa-miR-30c-5p	106396	0.391509
3.15502	0.00151763	0.316956	0	3	4	miRNA	FALSE	hsa-miR-30d-5p	110	0	3	0	0.989639	FALSE	0	hsa-miR-30d-5p	29632	0.402214
3.19757	0.000988595	0.312738	0	2	4	miRNA	FALSE	hsa-miR-30e-5p	146.5	0	2	0	0.989435	FALSE	0	hsa-miR-30e-5p	20636	0.563953
3.67173	0	0.272351	0	1	4	miRNA	FALSE	hsa-miR-3187-3p	104	0	1	0	0.987155	FALSE	0	hsa-miR-3187-3p	0	0
3.19757	0.000988595	0.312738	0	2	4	miRNA	FALSE	hsa-miR-329-3p	146.5	0	2	0	0.989435	FALSE	0	hsa-miR-329-3p	20636	0.563953
3.19757	0.000988595	0.312738	0	2	4	miRNA	FALSE	hsa-miR-330-3p	146.5	0	2	0	0.989435	FALSE	0	hsa-miR-330-3p	20636	0.563953
3.67173	0	0.272351	0	1	4	miRNA	FALSE	hsa-miR-338-5p	104	0	1	0	0.987155	FALSE	0	hsa-miR-338-5p	0	0
3.67173	0	0.272351	0	1	4	miRNA	FALSE	hsa-miR-339-3p	104	0	1	0	0.987155	FALSE	0	hsa-miR-339-3p	0	0
2.68997	0.00649672	0.371751	0	3	4	miRNA	FALSE	hsa-miR-378a-3p	167	0	3	0	0.991875	FALSE	0	hsa-miR-378a-3p	106396	0.391509
3.67173	0	0.272351	0	1	4	miRNA	FALSE	hsa-miR-378c	104	0	1	0	0.987155	FALSE	0	hsa-miR-378c	0	0
3.67173	0	0.272351	0	1	4	miRNA	FALSE	hsa-miR-378d	104	0	1	0	0.987155	FALSE	0	hsa-miR-378d	0	0
3.08207	0.00274961	0.324458	0	2	4	miRNA	FALSE	hsa-miR-422a	156	0	2	0	0.98999	FALSE	0	hsa-miR-422a	32588	0.523649
3.67173	0	0.272351	0	1	4	miRNA	FALSE	hsa-miR-425-5p	104	0	1	0	0.987155	FALSE	0	hsa-miR-425-5p	0	0
3.67173	0	0.272351	0	1	4	miRNA	FALSE	hsa-miR-4708-3p	104	0	1	0	0.987155	FALSE	0	hsa-miR-4708-3p	0	0
3.35258	0.00278642	0.298277	0	3	4	miRNA	FALSE	hsa-miR-484	76.6667	0	3	0	0.98869	FALSE	0	hsa-miR-484	22680	0.367314
3.67173	0	0.272351	0	1	4	miRNA	FALSE	hsa-miR-489-3p	104	0	1	0	0.987155	FALSE	0	hsa-miR-489-3p	0	0
3.67173	0	0.272351	0	1	4	miRNA	FALSE	hsa-miR-506-3p	104	0	1	0	0.987155	FALSE	0	hsa-miR-506-3p	0	0
2.51368	0.0130053	0.397823	0	4	4	miRNA	FALSE	hsa-miR-522-5p	147.5	0	4	0	0.992723	FALSE	0	hsa-miR-522-5p	170266	0.304574
3.67173	0	0.272351	0	1	4	miRNA	FALSE	hsa-miR-561-3p	104	0	1	0	0.987155	FALSE	0	hsa-miR-561-3p	0	0
3.19757	0.000988595	0.312738	0	2	4	miRNA	FALSE	hsa-miR-612	146.5	0	2	0	0.989435	FALSE	0	hsa-miR-612	20636	0.563953
3.19757	0.000988595	0.312738	0	2	4	miRNA	FALSE	hsa-miR-665	146.5	0	2	0	0.989435	FALSE	0	hsa-miR-665	20636	0.563953
2.68997	0.00649672	0.371751	0	3	4	miRNA	FALSE	hsa-miR-7-5p	167	0	3	0	0.991875	FALSE	0	hsa-miR-7-5p	106396	0.391509
3.08207	0.00274961	0.324458	0	2	4	miRNA	FALSE	hsa-miR-765	156	0	2	0	0.98999	FALSE	0	hsa-miR-765	32588	0.523649
3.15502	0.00151763	0.316956	0	3	4	miRNA	FALSE	hsa-miR-873-5p	110	0	3	0	0.989639	FALSE	0	hsa-miR-873-5p	29632	0.402214
3.67173	0	0.272351	0	1	4	miRNA	FALSE	hsa-miR-942-5p	104	0	1	0	0.987155	FALSE	0	hsa-miR-942-5p	0	0
2.8845	0.00860871	0.346681	0	4	4	miRNA	FALSE	hsa-miR-126-3p	107.75	0	4	0	0.99094	FALSE	0	hsa-miR-126-3p	84214	0.297354
2.97872	0.00533138	0.335714	0	3	4	miRNA	FALSE	hsa-miR-191-5p	127.333	0	3	0	0.990487	FALSE	0	hsa-miR-191-5p	59400	0.383992
3.67173	0	0.272351	0	1	4	miRNA	FALSE	hsa-miR-598-3p	104	0	1	0	0.987155	FALSE	0	hsa-miR-598-3p	0	0
2.80851	0.00459235	0.356061	0	3	4	miRNA	FALSE	hsa-miR-335-5p	148.667	0	3	0	0.991305	FALSE	0	hsa-miR-335-5p	74540	0.38355
2.84043	0.0717275	0.35206	0	49	3	mRNA	FALSE	SERPINA1	2.38776	0	49	0	0.991152	FALSE	0	SERPINA1	610868	0.198251
3.83891	0	0.260491	0	1	4	miRNA	FALSE	hsa-miR-1249-5p	49	0	1	0	0.986351	FALSE	0	hsa-miR-1249-5p	0	0
3.06687	0.00409821	0.326065	0	3	4	miRNA	FALSE	hsa-miR-1343-3p	115.333	0	3	0	0.990063	FALSE	0	hsa-miR-1343-3p	41868	0.381111
3.83891	0	0.260491	0	1	4	miRNA	FALSE	hsa-miR-3529-5p	49	0	1	0	0.986351	FALSE	0	hsa-miR-3529-5p	0	0
3.83891	0	0.260491	0	1	4	miRNA	FALSE	hsa-miR-379-5p	49	0	1	0	0.986351	FALSE	0	hsa-miR-379-5p	0	0
3.26748	0.000881577	0.306047	0	2	4	miRNA	FALSE	hsa-miR-4419a	128.5	0	2	0	0.989099	FALSE	0	hsa-miR-4419a	10472	0.542553
3.83891	0	0.260491	0	1	4	miRNA	FALSE	hsa-miR-4451	49	0	1	0	0.986351	FALSE	0	hsa-miR-4451	0	0
3.26748	0.000881577	0.306047	0	2	4	miRNA	FALSE	hsa-miR-4510	128.5	0	2	0	0.989099	FALSE	0	hsa-miR-4510	10472	0.542553
3.83891	0	0.260491	0	1	4	miRNA	FALSE	hsa-miR-4650-3p	49	0	1	0	0.986351	FALSE	0	hsa-miR-4650-3p	0	0
3.83891	0	0.260491	0	1	4	miRNA	FALSE	hsa-miR-4690-5p	49	0	1	0	0.986351	FALSE	0	hsa-miR-4690-5p	0	0
3.26748	0.000881577	0.306047	0	2	4	miRNA	FALSE	hsa-miR-6081	128.5	0	2	0	0.989099	FALSE	0	hsa-miR-6081	10472	0.542553
3.26748	0.000881577	0.306047	0	2	4	miRNA	FALSE	hsa-miR-6127	128.5	0	2	0	0.989099	FALSE	0	hsa-miR-6127	10472	0.542553
3.26748	0.000881577	0.306047	0	2	4	miRNA	FALSE	hsa-miR-6129	128.5	0	2	0	0.989099	FALSE	0	hsa-miR-6129	10472	0.542553
3.26748	0.000881577	0.306047	0	2	4	miRNA	FALSE	hsa-miR-6130	128.5	0	2	0	0.989099	FALSE	0	hsa-miR-6130	10472	0.542553
3.26748	0.000881577	0.306047	0	2	4	miRNA	FALSE	hsa-miR-6133	128.5	0	2	0	0.989099	FALSE	0	hsa-miR-6133	10472	0.542553
3.83891	0	0.260491	0	1	4	miRNA	FALSE	hsa-miR-6783-3p	49	0	1	0	0.986351	FALSE	0	hsa-miR-6783-3p	0	0
3.83891	0	0.260491	0	1	4	miRNA	FALSE	hsa-miR-6797-5p	49	0	1	0	0.986351	FALSE	0	hsa-miR-6797-5p	0	0
3.83891	0	0.260491	0	1	4	miRNA	FALSE	hsa-miR-6832-5p	49	0	1	0	0.986351	FALSE	0	hsa-miR-6832-5p	0	0
3.83891	0	0.260491	0	1	4	miRNA	FALSE	hsa-miR-1271-5p	49	0	1	0	0.986351	FALSE	0	hsa-miR-1271-5p	0	0
3.83891	0	0.260491	0	1	4	miRNA	FALSE	hsa-miR-132-5p	49	0	1	0	0.986351	FALSE	0	hsa-miR-132-5p	0	0
3.83891	0	0.260491	0	1	4	miRNA	FALSE	hsa-miR-145-3p	49	0	1	0	0.986351	FALSE	0	hsa-miR-145-3p	0	0
2.80851	0.00459235	0.356061	0	3	4	miRNA	FALSE	hsa-miR-15a-5p	148.667	0	3	0	0.991305	FALSE	0	hsa-miR-15a-5p	74540	0.38355
2.80851	0.00459235	0.356061	0	3	4	miRNA	FALSE	hsa-miR-15b-5p	148.667	0	3	0	0.991305	FALSE	0	hsa-miR-15b-5p	74540	0.38355
3.31307	0.000952261	0.301835	0	2	4	miRNA	FALSE	hsa-miR-190a-5p	119	0	2	0	0.988879	FALSE	0	hsa-miR-190a-5p	10896	0.536364
3.83891	0	0.260491	0	1	4	miRNA	FALSE	hsa-miR-190b	49	0	1	0	0.986351	FALSE	0	hsa-miR-190b	0	0
3.83891	0	0.260491	0	1	4	miRNA	FALSE	hsa-miR-212-5p	49	0	1	0	0.986351	FALSE	0	hsa-miR-212-5p	0	0
2.60182	0.0113976	0.384346	0	5	4	miRNA	FALSE	hsa-miR-214-3p	114.4	0	5	0	0.992299	FALSE	0	hsa-miR-214-3p	149510	0.251441
2.80851	0.00459235	0.356061	0	3	4	miRNA	FALSE	hsa-miR-296-5p	148.667	0	3	0	0.991305	FALSE	0	hsa-miR-296-5p	74540	0.38355
3.83891	0	0.260491	0	1	4	miRNA	FALSE	hsa-miR-3194-5p	49	0	1	0	0.986351	FALSE	0	hsa-miR-3194-5p	0	0
3.58663	0.00105086	0.278814	0	2	4	miRNA	FALSE	hsa-miR-328-3p	69	0	2	0	0.987564	FALSE	0	hsa-miR-328-3p	6290	0.523077
3.83891	0	0.260491	0	1	4	miRNA	FALSE	hsa-miR-3619-5p	49	0	1	0	0.986351	FALSE	0	hsa-miR-3619-5p	0	0
3.83891	0	0.260491	0	1	4	miRNA	FALSE	hsa-miR-455-3p	49	0	1	0	0.986351	FALSE	0	hsa-miR-455-3p	0	0
3.83891	0	0.260491	0	1	4	miRNA	FALSE	hsa-miR-4726-3p	49	0	1	0	0.986351	FALSE	0	hsa-miR-4726-3p	0	0
3.83891	0	0.260491	0	1	4	miRNA	FALSE	hsa-miR-548au-3p	49	0	1	0	0.986351	FALSE	0	hsa-miR-548au-3p	0	0
3.83891	0	0.260491	0	1	4	miRNA	FALSE	hsa-miR-769-5p	49	0	1	0	0.986351	FALSE	0	hsa-miR-769-5p	0	0
3.26748	0.000881577	0.306047	0	2	4	miRNA	FALSE	hsa-miR-671-5p	128.5	0	2	0	0.989099	FALSE	0	hsa-miR-671-5p	10472	0.542553
3.87538	0	0.258039	0	1	4	miRNA	FALSE	hsa-miR-143-3p	37	0	1	0	0.986176	FALSE	0	hsa-miR-143-3p	0	0
2.8769	0.0269123	0.347596	0	37	3	mRNA	FALSE	HK2	3.16216	0	37	0	0.990976	FALSE	0	HK2	391666	0.30888
3.3617	0.00024439	0.297468	0	2	4	miRNA	FALSE	hsa-miR-125a-5p	113	0	2	0	0.988646	FALSE	0	hsa-miR-125a-5p	4824	0.54902
2.84498	0.00357569	0.351496	0	3	4	miRNA	FALSE	hsa-miR-125b-5p	144.667	0	3	0	0.99113	FALSE	0	hsa-miR-125b-5p	66638	0.385165
3.08207	0.00308998	0.324458	0	3	4	miRNA	FALSE	hsa-miR-98-5p	111.333	0	3	0	0.98999	FALSE	0	hsa-miR-98-5p	37596	0.374011
3.87538	0	0.258039	0	1	4	miRNA	FALSE	hsa-miR-181b-5p	37	0	1	0	0.986176	FALSE	0	hsa-miR-181b-5p	0	0
3.3617	0.00024439	0.297468	0	2	4	miRNA	FALSE	hsa-miR-10a-3p	113	0	2	0	0.988646	FALSE	0	hsa-miR-10a-3p	4824	0.54902
3.87538	0	0.258039	0	1	4	miRNA	FALSE	hsa-miR-127-5p	37	0	1	0	0.986176	FALSE	0	hsa-miR-127-5p	0	0
3.3617	0.00024439	0.297468	0	2	4	miRNA	FALSE	hsa-miR-181a-5p	113	0	2	0	0.988646	FALSE	0	hsa-miR-181a-5p	4824	0.54902
3.3617	0.00024439	0.297468	0	2	4	miRNA	FALSE	hsa-miR-181c-5p	113	0	2	0	0.988646	FALSE	0	hsa-miR-181c-5p	4824	0.54902
3.87538	0	0.258039	0	1	4	miRNA	FALSE	hsa-miR-181d-5p	37	0	1	0	0.986176	FALSE	0	hsa-miR-181d-5p	0	0
3.27964	0.00057278	0.304912	0	2	4	miRNA	FALSE	hsa-miR-103a-3p	122.5	0	2	0	0.98904	FALSE	0	hsa-miR-103a-3p	8642	0.525974
3.3617	0.00024439	0.297468	0	2	4	miRNA	FALSE	hsa-miR-200b-3p	113	0	2	0	0.988646	FALSE	0	hsa-miR-200b-3p	4824	0.54902
3.3617	0.00024439	0.297468	0	2	4	miRNA	FALSE	hsa-miR-21-3p	113	0	2	0	0.988646	FALSE	0	hsa-miR-21-3p	4824	0.54902
3.71733	0	0.269011	0	1	4	miRNA	FALSE	hsa-miR-1262	89	0	1	0	0.986936	FALSE	0	hsa-miR-1262	0	0
2.71884	0.173075	0.367803	0	89	3	mRNA	FALSE	SLC2A1	1.86517	0	89	0	0.991736	FALSE	0	SLC2A1	1423390	0.123596
3.1459	0.00216577	0.317874	0	2	4	miRNA	FALSE	hsa-miR-324-3p	148.5	0	2	0	0.989683	FALSE	0	hsa-miR-324-3p	25106	0.536364
3.19149	0.00219244	0.313333	0	2	4	miRNA	FALSE	hsa-miR-320a	139	0	2	0	0.989464	FALSE	0	hsa-miR-320a	24104	0.530769
3.1459	0.00216577	0.317874	0	2	4	miRNA	FALSE	hsa-miR-149-5p	148.5	0	2	0	0.989683	FALSE	0	hsa-miR-149-5p	25106	0.536364
3.71733	0	0.269011	0	1	4	miRNA	FALSE	hsa-miR-3653-5p	89	0	1	0	0.986936	FALSE	0	hsa-miR-3653-5p	0	0
3.71733	0	0.269011	0	1	4	miRNA	FALSE	hsa-miR-1291	89	0	1	0	0.986936	FALSE	0	hsa-miR-1291	0	0
3.71733	0	0.269011	0	1	4	miRNA	FALSE	hsa-miR-4531	89	0	1	0	0.986936	FALSE	0	hsa-miR-4531	0	0
3.71733	0	0.269011	0	1	4	miRNA	FALSE	hsa-miR-6842-3p	89	0	1	0	0.986936	FALSE	0	hsa-miR-6842-3p	0	0
3.71733	0	0.269011	0	1	4	miRNA	FALSE	hsa-miR-5787	89	0	1	0	0.986936	FALSE	0	hsa-miR-5787	0	0
3.71733	0	0.269011	0	1	4	miRNA	FALSE	hsa-miR-4505	89	0	1	0	0.986936	FALSE	0	hsa-miR-4505	0	0
3.71733	0	0.269011	0	1	4	miRNA	FALSE	hsa-miR-4430	89	0	1	0	0.986936	FALSE	0	hsa-miR-4430	0	0
3.71733	0	0.269011	0	1	4	miRNA	FALSE	hsa-miR-3652	89	0	1	0	0.986936	FALSE	0	hsa-miR-3652	0	0
3.71733	0	0.269011	0	1	4	miRNA	FALSE	hsa-miR-4745-3p	89	0	1	0	0.986936	FALSE	0	hsa-miR-4745-3p	0	0
3.71733	0	0.269011	0	1	4	miRNA	FALSE	hsa-miR-1538	89	0	1	0	0.986936	FALSE	0	hsa-miR-1538	0	0
3.71733	0	0.269011	0	1	4	miRNA	FALSE	hsa-miR-5703	89	0	1	0	0.986936	FALSE	0	hsa-miR-5703	0	0
3.71733	0	0.269011	0	1	4	miRNA	FALSE	hsa-miR-4434	89	0	1	0	0.986936	FALSE	0	hsa-miR-4434	0	0
3.71733	0	0.269011	0	1	4	miRNA	FALSE	hsa-miR-4516	89	0	1	0	0.986936	FALSE	0	hsa-miR-4516	0	0
3.71733	0	0.269011	0	1	4	miRNA	FALSE	hsa-miR-3135b	89	0	1	0	0.986936	FALSE	0	hsa-miR-3135b	0	0
3.71733	0	0.269011	0	1	4	miRNA	FALSE	hsa-miR-1225-3p	89	0	1	0	0.986936	FALSE	0	hsa-miR-1225-3p	0	0
3.71733	0	0.269011	0	1	4	miRNA	FALSE	hsa-miR-4638-5p	89	0	1	0	0.986936	FALSE	0	hsa-miR-4638-5p	0	0
3.71733	0	0.269011	0	1	4	miRNA	FALSE	hsa-miR-4747-3p	89	0	1	0	0.986936	FALSE	0	hsa-miR-4747-3p	0	0
3.1459	0.00216577	0.317874	0	2	4	miRNA	FALSE	hsa-miR-4323	148.5	0	2	0	0.989683	FALSE	0	hsa-miR-4323	25106	0.536364
3.71733	0	0.269011	0	1	4	miRNA	FALSE	hsa-miR-3064-5p	89	0	1	0	0.986936	FALSE	0	hsa-miR-3064-5p	0	0
3.71733	0	0.269011	0	1	4	miRNA	FALSE	hsa-miR-6504-5p	89	0	1	0	0.986936	FALSE	0	hsa-miR-6504-5p	0	0
3.71733	0	0.269011	0	1	4	miRNA	FALSE	hsa-miR-2909	89	0	1	0	0.986936	FALSE	0	hsa-miR-2909	0	0
3.71733	0	0.269011	0	1	4	miRNA	FALSE	hsa-miR-6772-3p	89	0	1	0	0.986936	FALSE	0	hsa-miR-6772-3p	0	0
3.71733	0	0.269011	0	1	4	miRNA	FALSE	hsa-miR-6514-3p	89	0	1	0	0.986936	FALSE	0	hsa-miR-6514-3p	0	0
3.71733	0	0.269011	0	1	4	miRNA	FALSE	hsa-miR-1200	89	0	1	0	0.986936	FALSE	0	hsa-miR-1200	0	0
3.71733	0	0.269011	0	1	4	miRNA	FALSE	hsa-miR-1296-5p	89	0	1	0	0.986936	FALSE	0	hsa-miR-1296-5p	0	0
3.71733	0	0.269011	0	1	4	miRNA	FALSE	hsa-miR-6882-3p	89	0	1	0	0.986936	FALSE	0	hsa-miR-6882-3p	0	0
3.71733	0	0.269011	0	1	4	miRNA	FALSE	hsa-miR-4448	89	0	1	0	0.986936	FALSE	0	hsa-miR-4448	0	0
3.71733	0	0.269011	0	1	4	miRNA	FALSE	hsa-miR-4268	89	0	1	0	0.986936	FALSE	0	hsa-miR-4268	0	0
3.71733	0	0.269011	0	1	4	miRNA	FALSE	hsa-miR-6811-3p	89	0	1	0	0.986936	FALSE	0	hsa-miR-6811-3p	0	0
3.71733	0	0.269011	0	1	4	miRNA	FALSE	hsa-miR-214-5p	89	0	1	0	0.986936	FALSE	0	hsa-miR-214-5p	0	0
3.71733	0	0.269011	0	1	4	miRNA	FALSE	hsa-miR-7157-3p	89	0	1	0	0.986936	FALSE	0	hsa-miR-7157-3p	0	0
3.71733	0	0.269011	0	1	4	miRNA	FALSE	hsa-miR-6737-3p	89	0	1	0	0.986936	FALSE	0	hsa-miR-6737-3p	0	0
3.71733	0	0.269011	0	1	4	miRNA	FALSE	hsa-miR-5008-3p	89	0	1	0	0.986936	FALSE	0	hsa-miR-5008-3p	0	0
3.71733	0	0.269011	0	1	4	miRNA	FALSE	hsa-miR-6761-5p	89	0	1	0	0.986936	FALSE	0	hsa-miR-6761-5p	0	0
3.19149	0.00219244	0.313333	0	2	4	miRNA	FALSE	hsa-miR-6870-3p	139	0	2	0	0.989464	FALSE	0	hsa-miR-6870-3p	24104	0.530769
3.71733	0	0.269011	0	1	4	miRNA	FALSE	hsa-miR-1914-5p	89	0	1	0	0.986936	FALSE	0	hsa-miR-1914-5p	0	0
3.71733	0	0.269011	0	1	4	miRNA	FALSE	hsa-miR-544b	89	0	1	0	0.986936	FALSE	0	hsa-miR-544b	0	0
3.71733	0	0.269011	0	1	4	miRNA	FALSE	hsa-miR-4324	89	0	1	0	0.986936	FALSE	0	hsa-miR-4324	0	0
3.71733	0	0.269011	0	1	4	miRNA	FALSE	hsa-miR-4267	89	0	1	0	0.986936	FALSE	0	hsa-miR-4267	0	0
3.71733	0	0.269011	0	1	4	miRNA	FALSE	hsa-miR-5586-5p	89	0	1	0	0.986936	FALSE	0	hsa-miR-5586-5p	0	0
3.71733	0	0.269011	0	1	4	miRNA	FALSE	hsa-miR-3184-3p	89	0	1	0	0.986936	FALSE	0	hsa-miR-3184-3p	0	0
3.71733	0	0.269011	0	1	4	miRNA	FALSE	hsa-miR-132-3p	89	0	1	0	0.986936	FALSE	0	hsa-miR-132-3p	0	0
3.19149	0.00219244	0.313333	0	2	4	miRNA	FALSE	hsa-miR-150-5p	139	0	2	0	0.989464	FALSE	0	hsa-miR-150-5p	24104	0.530769
3.71733	0	0.269011	0	1	4	miRNA	FALSE	hsa-let-7a-3p	89	0	1	0	0.986936	FALSE	0	hsa-let-7a-3p	0	0
3.1459	0.00216577	0.317874	0	2	4	miRNA	FALSE	hsa-let-7a-5p	148.5	0	2	0	0.989683	FALSE	0	hsa-let-7a-5p	25106	0.536364
3.1459	0.00216577	0.317874	0	2	4	miRNA	FALSE	hsa-let-7c-5p	148.5	0	2	0	0.989683	FALSE	0	hsa-let-7c-5p	25106	0.536364
3.71733	0	0.269011	0	1	4	miRNA	FALSE	hsa-let-7f-2-3p	89	0	1	0	0.986936	FALSE	0	hsa-let-7f-2-3p	0	0
3.1459	0.00216577	0.317874	0	2	4	miRNA	FALSE	hsa-let-7f-5p	148.5	0	2	0	0.989683	FALSE	0	hsa-let-7f-5p	25106	0.536364
3.1459	0.00216577	0.317874	0	2	4	miRNA	FALSE	hsa-let-7g-5p	148.5	0	2	0	0.989683	FALSE	0	hsa-let-7g-5p	25106	0.536364
3.1459	0.00216577	0.317874	0	2	4	miRNA	FALSE	hsa-let-7i-5p	148.5	0	2	0	0.989683	FALSE	0	hsa-let-7i-5p	25106	0.536364
3.71733	0	0.269011	0	1	4	miRNA	FALSE	hsa-miR-25-3p	89	0	1	0	0.986936	FALSE	0	hsa-miR-25-3p	0	0
3.71733	0	0.269011	0	1	4	miRNA	FALSE	hsa-miR-3065-3p	89	0	1	0	0.986936	FALSE	0	hsa-miR-3065-3p	0	0
3.1459	0.00216577	0.317874	0	2	4	miRNA	FALSE	hsa-miR-30c-2-3p	148.5	0	2	0	0.989683	FALSE	0	hsa-miR-30c-2-3p	25106	0.536364
3.71733	0	0.269011	0	1	4	miRNA	FALSE	hsa-miR-3158-3p	89	0	1	0	0.986936	FALSE	0	hsa-miR-3158-3p	0	0
3.71733	0	0.269011	0	1	4	miRNA	FALSE	hsa-miR-330-5p	89	0	1	0	0.986936	FALSE	0	hsa-miR-330-5p	0	0
3.71733	0	0.269011	0	1	4	miRNA	FALSE	hsa-miR-449a	89	0	1	0	0.986936	FALSE	0	hsa-miR-449a	0	0
3.71733	0	0.269011	0	1	4	miRNA	FALSE	hsa-miR-545-3p	89	0	1	0	0.986936	FALSE	0	hsa-miR-545-3p	0	0
3.71733	0	0.269011	0	1	4	miRNA	FALSE	hsa-miR-589-5p	89	0	1	0	0.986936	FALSE	0	hsa-miR-589-5p	0	0
3.71733	0	0.269011	0	1	4	miRNA	FALSE	hsa-miR-627-5p	89	0	1	0	0.986936	FALSE	0	hsa-miR-627-5p	0	0
3.1459	0.00216577	0.317874	0	2	4	miRNA	FALSE	hsa-miR-766-3p	148.5	0	2	0	0.989683	FALSE	0	hsa-miR-766-3p	25106	0.536364
3.71733	0	0.269011	0	1	4	miRNA	FALSE	hsa-miR-767-5p	89	0	1	0	0.986936	FALSE	0	hsa-miR-767-5p	0	0
3.71733	0	0.269011	0	1	4	miRNA	FALSE	hsa-miR-769-3p	89	0	1	0	0.986936	FALSE	0	hsa-miR-769-3p	0	0
3.19149	0.00219244	0.313333	0	2	4	miRNA	FALSE	hsa-miR-503-5p	139	0	2	0	0.989464	FALSE	0	hsa-miR-503-5p	24104	0.530769
3.71733	0	0.269011	0	1	4	miRNA	FALSE	hsa-miR-194-5p	89	0	1	0	0.986936	FALSE	0	hsa-miR-194-5p	0	0
3.35562	0	0.298007	0	1	4	miRNA	FALSE	hsa-let-71f1	208	0	1	0	0.988675	FALSE	0	hsa-let-71f1	0	0
2.35714	0.428315	0.424242	0	208	3	mRNA	FALSE	HMGA1	1.65865	0	208	0	0.993475	FALSE	0	HMGA1	4680294	0.0940934
3.35562	0	0.298007	0	1	4	miRNA	FALSE	hsa-let-7a3b	208	0	1	0	0.988675	FALSE	0	hsa-let-7a3b	0	0
3.35562	0	0.298007	0	1	4	miRNA	FALSE	hsa-miR-1301-3p	208	0	1	0	0.988675	FALSE	0	hsa-miR-1301-3p	0	0
3.35562	0	0.298007	0	1	4	miRNA	FALSE	hsa-miR-877-3p	208	0	1	0	0.988675	FALSE	0	hsa-miR-877-3p	0	0
3.35562	0	0.298007	0	1	4	miRNA	FALSE	hsa-miR-877-5p	208	0	1	0	0.988675	FALSE	0	hsa-miR-877-5p	0	0
3.35562	0	0.298007	0	1	4	miRNA	FALSE	hsa-miR-744-5p	208	0	1	0	0.988675	FALSE	0	hsa-miR-744-5p	0	0
3.35562	0	0.298007	0	1	4	miRNA	FALSE	hsa-miR-296-3p	208	0	1	0	0.988675	FALSE	0	hsa-miR-296-3p	0	0
3.35562	0	0.298007	0	1	4	miRNA	FALSE	hsa-miR-18a-3p	208	0	1	0	0.988675	FALSE	0	hsa-miR-18a-3p	0	0
3.35562	0	0.298007	0	1	4	miRNA	FALSE	hsa-miR-331-3p	208	0	1	0	0.988675	FALSE	0	hsa-miR-331-3p	0	0
3.35562	0	0.298007	0	1	4	miRNA	FALSE	hsa-miR-222-3p	208	0	1	0	0.988675	FALSE	0	hsa-miR-222-3p	0	0
3.35562	0	0.298007	0	1	4	miRNA	FALSE	hsa-miR-142-3p	208	0	1	0	0.988675	FALSE	0	hsa-miR-142-3p	0	0
2.88146	0.00275852	0.347046	0	2	4	miRNA	FALSE	hsa-miR-185-3p	198.5	0	2	0	0.990955	FALSE	0	hsa-miR-185-3p	53172	0.54558
3.35562	0	0.298007	0	1	4	miRNA	FALSE	hsa-miR-4675	208	0	1	0	0.988675	FALSE	0	hsa-miR-4675	0	0
3.35562	0	0.298007	0	1	4	miRNA	FALSE	hsa-miR-4741	208	0	1	0	0.988675	FALSE	0	hsa-miR-4741	0	0
3.35562	0	0.298007	0	1	4	miRNA	FALSE	hsa-miR-6805-5p	208	0	1	0	0.988675	FALSE	0	hsa-miR-6805-5p	0	0
3.35562	0	0.298007	0	1	4	miRNA	FALSE	hsa-miR-6846-5p	208	0	1	0	0.988675	FALSE	0	hsa-miR-6846-5p	0	0
3.35562	0	0.298007	0	1	4	miRNA	FALSE	hsa-miR-6848-5p	208	0	1	0	0.988675	FALSE	0	hsa-miR-6848-5p	0	0
3.35562	0	0.298007	0	1	4	miRNA	FALSE	hsa-miR-1184	208	0	1	0	0.988675	FALSE	0	hsa-miR-1184	0	0
3.35562	0	0.298007	0	1	4	miRNA	FALSE	hsa-miR-1233-3p	208	0	1	0	0.988675	FALSE	0	hsa-miR-1233-3p	0	0
3.35562	0	0.298007	0	1	4	miRNA	FALSE	hsa-miR-3173-5p	208	0	1	0	0.988675	FALSE	0	hsa-miR-3173-5p	0	0
3.35562	0	0.298007	0	1	4	miRNA	FALSE	hsa-miR-4286	208	0	1	0	0.988675	FALSE	0	hsa-miR-4286	0	0
3.35562	0	0.298007	0	1	4	miRNA	FALSE	hsa-miR-4641	208	0	1	0	0.988675	FALSE	0	hsa-miR-4641	0	0
3.35562	0	0.298007	0	1	4	miRNA	FALSE	hsa-miR-6779-3p	208	0	1	0	0.988675	FALSE	0	hsa-miR-6779-3p	0	0
3.35562	0	0.298007	0	1	4	miRNA	FALSE	hsa-miR-6783-5p	208	0	1	0	0.988675	FALSE	0	hsa-miR-6783-5p	0	0
3.35562	0	0.298007	0	1	4	miRNA	FALSE	hsa-miR-6799-3p	208	0	1	0	0.988675	FALSE	0	hsa-miR-6799-3p	0	0
3.35562	0	0.298007	0	1	4	miRNA	FALSE	hsa-miR-6827-5p	208	0	1	0	0.988675	FALSE	0	hsa-miR-6827-5p	0	0
3.35562	0	0.298007	0	1	4	miRNA	FALSE	hsa-miR-6871-5p	208	0	1	0	0.988675	FALSE	0	hsa-miR-6871-5p	0	0
3.35562	0	0.298007	0	1	4	miRNA	FALSE	hsa-miR-7978	208	0	1	0	0.988675	FALSE	0	hsa-miR-7978	0	0
3.35562	0	0.298007	0	1	4	miRNA	FALSE	hsa-miR-520a-5p	208	0	1	0	0.988675	FALSE	0	hsa-miR-520a-5p	0	0
3.35562	0	0.298007	0	1	4	miRNA	FALSE	hsa-miR-525-5p	208	0	1	0	0.988675	FALSE	0	hsa-miR-525-5p	0	0
3.35562	0	0.298007	0	1	4	miRNA	FALSE	hsa-miR-4257	208	0	1	0	0.988675	FALSE	0	hsa-miR-4257	0	0
3.35562	0	0.298007	0	1	4	miRNA	FALSE	hsa-miR-4458	208	0	1	0	0.988675	FALSE	0	hsa-miR-4458	0	0
3.35562	0	0.298007	0	1	4	miRNA	FALSE	hsa-miR-4500	208	0	1	0	0.988675	FALSE	0	hsa-miR-4500	0	0
3.35562	0	0.298007	0	1	4	miRNA	FALSE	hsa-miR-6847-5p	208	0	1	0	0.988675	FALSE	0	hsa-miR-6847-5p	0	0
2.88146	0.00275852	0.347046	0	2	4	miRNA	FALSE	hsa-miR-185-5p	198.5	0	2	0	0.990955	FALSE	0	hsa-miR-185-5p	53172	0.54558
3.35562	0	0.298007	0	1	4	miRNA	FALSE	hsa-miR-3611	208	0	1	0	0.988675	FALSE	0	hsa-miR-3611	0	0
3.35562	0	0.298007	0	1	4	miRNA	FALSE	hsa-miR-3148	208	0	1	0	0.988675	FALSE	0	hsa-miR-3148	0	0
3.35562	0	0.298007	0	1	4	miRNA	FALSE	hsa-miR-6859-5p	208	0	1	0	0.988675	FALSE	0	hsa-miR-6859-5p	0	0
3.35562	0	0.298007	0	1	4	miRNA	FALSE	hsa-miR-3916	208	0	1	0	0.988675	FALSE	0	hsa-miR-3916	0	0
3.35562	0	0.298007	0	1	4	miRNA	FALSE	hsa-miR-4694-3p	208	0	1	0	0.988675	FALSE	0	hsa-miR-4694-3p	0	0
3.35562	0	0.298007	0	1	4	miRNA	FALSE	hsa-miR-3125	208	0	1	0	0.988675	FALSE	0	hsa-miR-3125	0	0
3.35562	0	0.298007	0	1	4	miRNA	FALSE	hsa-miR-758-3p	208	0	1	0	0.988675	FALSE	0	hsa-miR-758-3p	0	0
3.35562	0	0.298007	0	1	4	miRNA	FALSE	hsa-miR-7108-5p	208	0	1	0	0.988675	FALSE	0	hsa-miR-7108-5p	0	0
3.35562	0	0.298007	0	1	4	miRNA	FALSE	hsa-miR-588	208	0	1	0	0.988675	FALSE	0	hsa-miR-588	0	0
3.35562	0	0.298007	0	1	4	miRNA	FALSE	hsa-miR-4701-5p	208	0	1	0	0.988675	FALSE	0	hsa-miR-4701-5p	0	0
3.35562	0	0.298007	0	1	4	miRNA	FALSE	hsa-miR-4709-3p	208	0	1	0	0.988675	FALSE	0	hsa-miR-4709-3p	0	0
3.35562	0	0.298007	0	1	4	miRNA	FALSE	hsa-miR-6824-5p	208	0	1	0	0.988675	FALSE	0	hsa-miR-6824-5p	0	0
3.35562	0	0.298007	0	1	4	miRNA	FALSE	hsa-miR-6802-3p	208	0	1	0	0.988675	FALSE	0	hsa-miR-6802-3p	0	0
3.35562	0	0.298007	0	1	4	miRNA	FALSE	hsa-miR-663b	208	0	1	0	0.988675	FALSE	0	hsa-miR-663b	0	0
3.35562	0	0.298007	0	1	4	miRNA	FALSE	hsa-miR-7974	208	0	1	0	0.988675	FALSE	0	hsa-miR-7974	0	0
3.35562	0	0.298007	0	1	4	miRNA	FALSE	hsa-miR-6809-5p	208	0	1	0	0.988675	FALSE	0	hsa-miR-6809-5p	0	0
3.35562	0	0.298007	0	1	4	miRNA	FALSE	hsa-miR-6862-3p	208	0	1	0	0.988675	FALSE	0	hsa-miR-6862-3p	0	0
3.35562	0	0.298007	0	1	4	miRNA	FALSE	hsa-miR-6784-3p	208	0	1	0	0.988675	FALSE	0	hsa-miR-6784-3p	0	0
2.88146	0.00275852	0.347046	0	2	4	miRNA	FALSE	hsa-miR-6873-5p	198.5	0	2	0	0.990955	FALSE	0	hsa-miR-6873-5p	53172	0.54558
3.35562	0	0.298007	0	1	4	miRNA	FALSE	hsa-miR-3650	208	0	1	0	0.988675	FALSE	0	hsa-miR-3650	0	0
3.35562	0	0.298007	0	1	4	miRNA	FALSE	hsa-miR-920	208	0	1	0	0.988675	FALSE	0	hsa-miR-920	0	0
3.35562	0	0.298007	0	1	4	miRNA	FALSE	hsa-miR-6726-5p	208	0	1	0	0.988675	FALSE	0	hsa-miR-6726-5p	0	0
3.35562	0	0.298007	0	1	4	miRNA	FALSE	hsa-miR-5591-5p	208	0	1	0	0.988675	FALSE	0	hsa-miR-5591-5p	0	0
3.35562	0	0.298007	0	1	4	miRNA	FALSE	hsa-miR-4300	208	0	1	0	0.988675	FALSE	0	hsa-miR-4300	0	0
3.35562	0	0.298007	0	1	4	miRNA	FALSE	hsa-miR-6090	208	0	1	0	0.988675	FALSE	0	hsa-miR-6090	0	0
3.35562	0	0.298007	0	1	4	miRNA	FALSE	hsa-miR-4659b-5p	208	0	1	0	0.988675	FALSE	0	hsa-miR-4659b-5p	0	0
3.35562	0	0.298007	0	1	4	miRNA	FALSE	hsa-miR-4659a-5p	208	0	1	0	0.988675	FALSE	0	hsa-miR-4659a-5p	0	0
3.35562	0	0.298007	0	1	4	miRNA	FALSE	hsa-miR-2355-5p	208	0	1	0	0.988675	FALSE	0	hsa-miR-2355-5p	0	0
3.35562	0	0.298007	0	1	4	miRNA	FALSE	hsa-miR-4749-3p	208	0	1	0	0.988675	FALSE	0	hsa-miR-4749-3p	0	0
3.35562	0	0.298007	0	1	4	miRNA	FALSE	hsa-miR-3189-5p	208	0	1	0	0.988675	FALSE	0	hsa-miR-3189-5p	0	0
3.35562	0	0.298007	0	1	4	miRNA	FALSE	hsa-miR-4758-3p	208	0	1	0	0.988675	FALSE	0	hsa-miR-4758-3p	0	0
3.35562	0	0.298007	0	1	4	miRNA	FALSE	hsa-miR-5699-5p	208	0	1	0	0.988675	FALSE	0	hsa-miR-5699-5p	0	0
3.35562	0	0.298007	0	1	4	miRNA	FALSE	hsa-miR-1236-3p	208	0	1	0	0.988675	FALSE	0	hsa-miR-1236-3p	0	0
3.35562	0	0.298007	0	1	4	miRNA	FALSE	hsa-miR-6872-3p	208	0	1	0	0.988675	FALSE	0	hsa-miR-6872-3p	0	0
3.35562	0	0.298007	0	1	4	miRNA	FALSE	hsa-miR-6769a-3p	208	0	1	0	0.988675	FALSE	0	hsa-miR-6769a-3p	0	0
3.35562	0	0.298007	0	1	4	miRNA	FALSE	hsa-miR-625-5p	208	0	1	0	0.988675	FALSE	0	hsa-miR-625-5p	0	0
3.35562	0	0.298007	0	1	4	miRNA	FALSE	hsa-miR-1207-5p	208	0	1	0	0.988675	FALSE	0	hsa-miR-1207-5p	0	0
3.35562	0	0.298007	0	1	4	miRNA	FALSE	hsa-miR-1224-3p	208	0	1	0	0.988675	FALSE	0	hsa-miR-1224-3p	0	0
2.88146	0.00275852	0.347046	0	2	4	miRNA	FALSE	hsa-miR-125a-3p	198.5	0	2	0	0.990955	FALSE	0	hsa-miR-125a-3p	53172	0.54558
3.35562	0	0.298007	0	1	4	miRNA	FALSE	hsa-miR-1273h-5p	208	0	1	0	0.988675	FALSE	0	hsa-miR-1273h-5p	0	0
3.35562	0	0.298007	0	1	4	miRNA	FALSE	hsa-miR-1321	208	0	1	0	0.988675	FALSE	0	hsa-miR-1321	0	0
3.35562	0	0.298007	0	1	4	miRNA	FALSE	hsa-miR-1343-5p	208	0	1	0	0.988675	FALSE	0	hsa-miR-1343-5p	0	0
3.35562	0	0.298007	0	1	4	miRNA	FALSE	hsa-miR-1976	208	0	1	0	0.988675	FALSE	0	hsa-miR-1976	0	0
3.35562	0	0.298007	0	1	4	miRNA	FALSE	hsa-miR-30c-1-3p	208	0	1	0	0.988675	FALSE	0	hsa-miR-30c-1-3p	0	0
3.35562	0	0.298007	0	1	4	miRNA	FALSE	hsa-miR-3667-3p	208	0	1	0	0.988675	FALSE	0	hsa-miR-3667-3p	0	0
3.35562	0	0.298007	0	1	4	miRNA	FALSE	hsa-miR-3689a-3p	208	0	1	0	0.988675	FALSE	0	hsa-miR-3689a-3p	0	0
3.35562	0	0.298007	0	1	4	miRNA	FALSE	hsa-miR-3689b-3p	208	0	1	0	0.988675	FALSE	0	hsa-miR-3689b-3p	0	0
3.35562	0	0.298007	0	1	4	miRNA	FALSE	hsa-miR-3689c	208	0	1	0	0.988675	FALSE	0	hsa-miR-3689c	0	0
3.35562	0	0.298007	0	1	4	miRNA	FALSE	hsa-miR-3934-5p	208	0	1	0	0.988675	FALSE	0	hsa-miR-3934-5p	0	0
3.35562	0	0.298007	0	1	4	miRNA	FALSE	hsa-miR-4270	208	0	1	0	0.988675	FALSE	0	hsa-miR-4270	0	0
3.35562	0	0.298007	0	1	4	miRNA	FALSE	hsa-miR-4278	208	0	1	0	0.988675	FALSE	0	hsa-miR-4278	0	0
3.35562	0	0.298007	0	1	4	miRNA	FALSE	hsa-miR-4297	208	0	1	0	0.988675	FALSE	0	hsa-miR-4297	0	0
3.35562	0	0.298007	0	1	4	miRNA	FALSE	hsa-miR-4425	208	0	1	0	0.988675	FALSE	0	hsa-miR-4425	0	0
3.35562	0	0.298007	0	1	4	miRNA	FALSE	hsa-miR-4441	208	0	1	0	0.988675	FALSE	0	hsa-miR-4441	0	0
3.35562	0	0.298007	0	1	4	miRNA	FALSE	hsa-miR-4459	208	0	1	0	0.988675	FALSE	0	hsa-miR-4459	0	0
3.35562	0	0.298007	0	1	4	miRNA	FALSE	hsa-miR-4667-3p	208	0	1	0	0.988675	FALSE	0	hsa-miR-4667-3p	0	0
3.35562	0	0.298007	0	1	4	miRNA	FALSE	hsa-miR-4690-3p	208	0	1	0	0.988675	FALSE	0	hsa-miR-4690-3p	0	0
3.35562	0	0.298007	0	1	4	miRNA	FALSE	hsa-miR-4722-3p	208	0	1	0	0.988675	FALSE	0	hsa-miR-4722-3p	0	0
3.35562	0	0.298007	0	1	4	miRNA	FALSE	hsa-miR-4722-5p	208	0	1	0	0.988675	FALSE	0	hsa-miR-4722-5p	0	0
3.35562	0	0.298007	0	1	4	miRNA	FALSE	hsa-miR-4739	208	0	1	0	0.988675	FALSE	0	hsa-miR-4739	0	0
3.35562	0	0.298007	0	1	4	miRNA	FALSE	hsa-miR-4756-5p	208	0	1	0	0.988675	FALSE	0	hsa-miR-4756-5p	0	0
3.35562	0	0.298007	0	1	4	miRNA	FALSE	hsa-miR-4763-3p	208	0	1	0	0.988675	FALSE	0	hsa-miR-4763-3p	0	0
3.35562	0	0.298007	0	1	4	miRNA	FALSE	hsa-miR-4779	208	0	1	0	0.988675	FALSE	0	hsa-miR-4779	0	0
3.35562	0	0.298007	0	1	4	miRNA	FALSE	hsa-miR-486-3p	208	0	1	0	0.988675	FALSE	0	hsa-miR-486-3p	0	0
3.35562	0	0.298007	0	1	4	miRNA	FALSE	hsa-miR-486-5p	208	0	1	0	0.988675	FALSE	0	hsa-miR-486-5p	0	0
3.35562	0	0.298007	0	1	4	miRNA	FALSE	hsa-miR-5581-5p	208	0	1	0	0.988675	FALSE	0	hsa-miR-5581-5p	0	0
3.35562	0	0.298007	0	1	4	miRNA	FALSE	hsa-miR-5685	208	0	1	0	0.988675	FALSE	0	hsa-miR-5685	0	0
3.35562	0	0.298007	0	1	4	miRNA	FALSE	hsa-miR-6165	208	0	1	0	0.988675	FALSE	0	hsa-miR-6165	0	0
2.88146	0.00275852	0.347046	0	2	4	miRNA	FALSE	hsa-miR-660-3p	198.5	0	2	0	0.990955	FALSE	0	hsa-miR-660-3p	53172	0.54558
3.35562	0	0.298007	0	1	4	miRNA	FALSE	hsa-miR-6721-5p	208	0	1	0	0.988675	FALSE	0	hsa-miR-6721-5p	0	0
3.35562	0	0.298007	0	1	4	miRNA	FALSE	hsa-miR-6727-3p	208	0	1	0	0.988675	FALSE	0	hsa-miR-6727-3p	0	0
3.35562	0	0.298007	0	1	4	miRNA	FALSE	hsa-miR-6747-3p	208	0	1	0	0.988675	FALSE	0	hsa-miR-6747-3p	0	0
3.35562	0	0.298007	0	1	4	miRNA	FALSE	hsa-miR-6754-5p	208	0	1	0	0.988675	FALSE	0	hsa-miR-6754-5p	0	0
3.35562	0	0.298007	0	1	4	miRNA	FALSE	hsa-miR-6779-5p	208	0	1	0	0.988675	FALSE	0	hsa-miR-6779-5p	0	0
3.35562	0	0.298007	0	1	4	miRNA	FALSE	hsa-miR-6780a-5p	208	0	1	0	0.988675	FALSE	0	hsa-miR-6780a-5p	0	0
3.35562	0	0.298007	0	1	4	miRNA	FALSE	hsa-miR-6788-5p	208	0	1	0	0.988675	FALSE	0	hsa-miR-6788-5p	0	0
3.35562	0	0.298007	0	1	4	miRNA	FALSE	hsa-miR-6789-5p	208	0	1	0	0.988675	FALSE	0	hsa-miR-6789-5p	0	0
3.35562	0	0.298007	0	1	4	miRNA	FALSE	hsa-miR-6815-5p	208	0	1	0	0.988675	FALSE	0	hsa-miR-6815-5p	0	0
3.35562	0	0.298007	0	1	4	miRNA	FALSE	hsa-miR-6865-5p	208	0	1	0	0.988675	FALSE	0	hsa-miR-6865-5p	0	0
3.35562	0	0.298007	0	1	4	miRNA	FALSE	hsa-miR-6887-3p	208	0	1	0	0.988675	FALSE	0	hsa-miR-6887-3p	0	0
3.35562	0	0.298007	0	1	4	miRNA	FALSE	hsa-miR-7106-5p	208	0	1	0	0.988675	FALSE	0	hsa-miR-7106-5p	0	0
3.35562	0	0.298007	0	1	4	miRNA	FALSE	hsa-miR-7112-5p	208	0	1	0	0.988675	FALSE	0	hsa-miR-7112-5p	0	0
3.35562	0	0.298007	0	1	4	miRNA	FALSE	hsa-miR-7152-5p	208	0	1	0	0.988675	FALSE	0	hsa-miR-7152-5p	0	0
3.35562	0	0.298007	0	1	4	miRNA	FALSE	hsa-miR-764	208	0	1	0	0.988675	FALSE	0	hsa-miR-764	0	0
3.35562	0	0.298007	0	1	4	miRNA	FALSE	hsa-miR-887-5p	208	0	1	0	0.988675	FALSE	0	hsa-miR-887-5p	0	0
3.35562	0	0.298007	0	1	4	miRNA	FALSE	hsa-miR-92a-1-5p	208	0	1	0	0.988675	FALSE	0	hsa-miR-92a-1-5p	0	0
3.35562	0	0.298007	0	1	4	miRNA	FALSE	hsa-miR-939-5p	208	0	1	0	0.988675	FALSE	0	hsa-miR-939-5p	0	0
2.88146	0.00275852	0.347046	0	2	4	miRNA	FALSE	hsa-miR-1292-5p	198.5	0	2	0	0.990955	FALSE	0	hsa-miR-1292-5p	53172	0.54558
3.35562	0	0.298007	0	1	4	miRNA	FALSE	hsa-miR-149-3p	208	0	1	0	0.988675	FALSE	0	hsa-miR-149-3p	0	0
3.35562	0	0.298007	0	1	4	miRNA	FALSE	hsa-miR-17-3p	208	0	1	0	0.988675	FALSE	0	hsa-miR-17-3p	0	0
3.35562	0	0.298007	0	1	4	miRNA	FALSE	hsa-miR-1914-3p	208	0	1	0	0.988675	FALSE	0	hsa-miR-1914-3p	0	0
3.35562	0	0.298007	0	1	4	miRNA	FALSE	hsa-miR-197-3p	208	0	1	0	0.988675	FALSE	0	hsa-miR-197-3p	0	0
3.35562	0	0.298007	0	1	4	miRNA	FALSE	hsa-miR-20a-3p	208	0	1	0	0.988675	FALSE	0	hsa-miR-20a-3p	0	0
3.35562	0	0.298007	0	1	4	miRNA	FALSE	hsa-miR-216a-5p	208	0	1	0	0.988675	FALSE	0	hsa-miR-216a-5p	0	0
3.35562	0	0.298007	0	1	4	miRNA	FALSE	hsa-miR-3145-3p	208	0	1	0	0.988675	FALSE	0	hsa-miR-3145-3p	0	0
3.35562	0	0.298007	0	1	4	miRNA	FALSE	hsa-miR-3179	208	0	1	0	0.988675	FALSE	0	hsa-miR-3179	0	0
3.35562	0	0.298007	0	1	4	miRNA	FALSE	hsa-miR-335-3p	208	0	1	0	0.988675	FALSE	0	hsa-miR-335-3p	0	0
3.35562	0	0.298007	0	1	4	miRNA	FALSE	hsa-miR-346	208	0	1	0	0.988675	FALSE	0	hsa-miR-346	0	0
3.35562	0	0.298007	0	1	4	miRNA	FALSE	hsa-miR-483-3p	208	0	1	0	0.988675	FALSE	0	hsa-miR-483-3p	0	0
2.88146	0.00275852	0.347046	0	2	4	miRNA	FALSE	hsa-miR-497-5p	198.5	0	2	0	0.990955	FALSE	0	hsa-miR-497-5p	53172	0.54558
3.35562	0	0.298007	0	1	4	miRNA	FALSE	hsa-miR-505-5p	208	0	1	0	0.988675	FALSE	0	hsa-miR-505-5p	0	0
3.35562	0	0.298007	0	1	4	miRNA	FALSE	hsa-miR-510-5p	208	0	1	0	0.988675	FALSE	0	hsa-miR-510-5p	0	0
3.35562	0	0.298007	0	1	4	miRNA	FALSE	hsa-miR-564	208	0	1	0	0.988675	FALSE	0	hsa-miR-564	0	0
3.35562	0	0.298007	0	1	4	miRNA	FALSE	hsa-miR-658	208	0	1	0	0.988675	FALSE	0	hsa-miR-658	0	0
3.35562	0	0.298007	0	1	4	miRNA	FALSE	hsa-miR-664a-5p	208	0	1	0	0.988675	FALSE	0	hsa-miR-664a-5p	0	0
3.35562	0	0.298007	0	1	4	miRNA	FALSE	hsa-miR-675-5p	208	0	1	0	0.988675	FALSE	0	hsa-miR-675-5p	0	0
2.88146	0.00275852	0.347046	0	2	4	miRNA	FALSE	hsa-miR-147a	198.5	0	2	0	0.990955	FALSE	0	hsa-miR-147a	53172	0.54558
2.41489	0.352546	0.414097	0	189	3	mRNA	FALSE	VEGFA	1.93122	0	189	0	0.993198	FALSE	0	VEGFA	4981988	0.133031
3.41337	0	0.292965	0	1	4	miRNA	FALSE	hsa-miR-302d-3p	189	0	1	0	0.988397	FALSE	0	hsa-miR-302d-3p	0	0
3.41337	0	0.292965	0	1	4	miRNA	FALSE	hsa-miR-372-3p	189	0	1	0	0.988397	FALSE	0	hsa-miR-372-3p	0	0
3.41337	0	0.292965	0	1	4	miRNA	FALSE	hsa-miR-520h	189	0	1	0	0.988397	FALSE	0	hsa-miR-520h	0	0
3.41337	0	0.292965	0	1	4	miRNA	FALSE	hsa-miR-378a-5p	189	0	1	0	0.988397	FALSE	0	hsa-miR-378a-5p	0	0
3.41337	0	0.292965	0	1	4	miRNA	FALSE	hsa-miR-504-5p	189	0	1	0	0.988397	FALSE	0	hsa-miR-504-5p	0	0
3.41337	0	0.292965	0	1	4	miRNA	FALSE	hsa-miR-520g-3p	189	0	1	0	0.988397	FALSE	0	hsa-miR-520g-3p	0	0
3.41337	0	0.292965	0	1	4	miRNA	FALSE	hsa-miR-134-5p	189	0	1	0	0.988397	FALSE	0	hsa-miR-134-5p	0	0
3.41337	0	0.292965	0	1	4	miRNA	FALSE	hsa-miR-361-5p	189	0	1	0	0.988397	FALSE	0	hsa-miR-361-5p	0	0
3.41337	0	0.292965	0	1	4	miRNA	FALSE	hsa-miR-34b-3p	189	0	1	0	0.988397	FALSE	0	hsa-miR-34b-3p	0	0
3.41337	0	0.292965	0	1	4	miRNA	FALSE	hsa-miR-200c-3p	189	0	1	0	0.988397	FALSE	0	hsa-miR-200c-3p	0	0
3.41337	0	0.292965	0	1	4	miRNA	FALSE	hsa-miR-598-5p	189	0	1	0	0.988397	FALSE	0	hsa-miR-598-5p	0	0
3.41337	0	0.292965	0	1	4	miRNA	FALSE	hsa-miR-374b-3p	189	0	1	0	0.988397	FALSE	0	hsa-miR-374b-3p	0	0
3.41337	0	0.292965	0	1	4	miRNA	FALSE	hsa-miR-3163	189	0	1	0	0.988397	FALSE	0	hsa-miR-3163	0	0
3.41337	0	0.292965	0	1	4	miRNA	FALSE	hsa-miR-4524a-5p	189	0	1	0	0.988397	FALSE	0	hsa-miR-4524a-5p	0	0
3.41337	0	0.292965	0	1	4	miRNA	FALSE	hsa-miR-451b	189	0	1	0	0.988397	FALSE	0	hsa-miR-451b	0	0
3.41337	0	0.292965	0	1	4	miRNA	FALSE	hsa-miR-4524b-5p	189	0	1	0	0.988397	FALSE	0	hsa-miR-4524b-5p	0	0
3.41337	0	0.292965	0	1	4	miRNA	FALSE	hsa-miR-6838-5p	189	0	1	0	0.988397	FALSE	0	hsa-miR-6838-5p	0	0
3.41337	0	0.292965	0	1	4	miRNA	FALSE	hsa-miR-568	189	0	1	0	0.988397	FALSE	0	hsa-miR-568	0	0
3.41337	0	0.292965	0	1	4	miRNA	FALSE	hsa-miR-423-3p	189	0	1	0	0.988397	FALSE	0	hsa-miR-423-3p	0	0
3.41337	0	0.292965	0	1	4	miRNA	FALSE	hsa-miR-141-5p	189	0	1	0	0.988397	FALSE	0	hsa-miR-141-5p	0	0
3.41337	0	0.292965	0	1	4	miRNA	FALSE	hsa-miR-297	189	0	1	0	0.988397	FALSE	0	hsa-miR-297	0	0
3.41337	0	0.292965	0	1	4	miRNA	FALSE	hsa-miR-718	189	0	1	0	0.988397	FALSE	0	hsa-miR-718	0	0
3.41337	0	0.292965	0	1	4	miRNA	FALSE	hsa-miR-3924	189	0	1	0	0.988397	FALSE	0	hsa-miR-3924	0	0
3.41337	0	0.292965	0	1	4	miRNA	FALSE	hsa-miR-6759-5p	189	0	1	0	0.988397	FALSE	0	hsa-miR-6759-5p	0	0
3.41337	0	0.292965	0	1	4	miRNA	FALSE	hsa-miR-6769a-5p	189	0	1	0	0.988397	FALSE	0	hsa-miR-6769a-5p	0	0
3.41337	0	0.292965	0	1	4	miRNA	FALSE	hsa-miR-6769b-5p	189	0	1	0	0.988397	FALSE	0	hsa-miR-6769b-5p	0	0
3.41337	0	0.292965	0	1	4	miRNA	FALSE	hsa-miR-95-5p	189	0	1	0	0.988397	FALSE	0	hsa-miR-95-5p	0	0
3.41337	0	0.292965	0	1	4	miRNA	FALSE	hsa-miR-1252-3p	189	0	1	0	0.988397	FALSE	0	hsa-miR-1252-3p	0	0
3.41337	0	0.292965	0	1	4	miRNA	FALSE	hsa-miR-3646	189	0	1	0	0.988397	FALSE	0	hsa-miR-3646	0	0
3.41337	0	0.292965	0	1	4	miRNA	FALSE	hsa-miR-5682	189	0	1	0	0.988397	FALSE	0	hsa-miR-5682	0	0
3.41337	0	0.292965	0	1	4	miRNA	FALSE	hsa-miR-6871-3p	189	0	1	0	0.988397	FALSE	0	hsa-miR-6871-3p	0	0
3.41337	0	0.292965	0	1	4	miRNA	FALSE	hsa-miR-7-2-3p	189	0	1	0	0.988397	FALSE	0	hsa-miR-7-2-3p	0	0
3.41337	0	0.292965	0	1	4	miRNA	FALSE	hsa-miR-7-1-3p	189	0	1	0	0.988397	FALSE	0	hsa-miR-7-1-3p	0	0
3.41337	0	0.292965	0	1	4	miRNA	FALSE	hsa-miR-5688	189	0	1	0	0.988397	FALSE	0	hsa-miR-5688	0	0
3.41337	0	0.292965	0	1	4	miRNA	FALSE	hsa-miR-495-3p	189	0	1	0	0.988397	FALSE	0	hsa-miR-495-3p	0	0
3.41337	0	0.292965	0	1	4	miRNA	FALSE	hsa-miR-646	189	0	1	0	0.988397	FALSE	0	hsa-miR-646	0	0
3.41337	0	0.292965	0	1	4	miRNA	FALSE	hsa-miR-374b-5p	189	0	1	0	0.988397	FALSE	0	hsa-miR-374b-5p	0	0
3.41337	0	0.292965	0	1	4	miRNA	FALSE	hsa-miR-6793-5p	189	0	1	0	0.988397	FALSE	0	hsa-miR-6793-5p	0	0
3.41337	0	0.292965	0	1	4	miRNA	FALSE	hsa-miR-567	189	0	1	0	0.988397	FALSE	0	hsa-miR-567	0	0
3.41337	0	0.292965	0	1	4	miRNA	FALSE	hsa-miR-5692c	189	0	1	0	0.988397	FALSE	0	hsa-miR-5692c	0	0
3.41337	0	0.292965	0	1	4	miRNA	FALSE	hsa-miR-5692b	189	0	1	0	0.988397	FALSE	0	hsa-miR-5692b	0	0
3.41337	0	0.292965	0	1	4	miRNA	FALSE	hsa-miR-369-3p	189	0	1	0	0.988397	FALSE	0	hsa-miR-369-3p	0	0
3.41337	0	0.292965	0	1	4	miRNA	FALSE	hsa-miR-4789-5p	189	0	1	0	0.988397	FALSE	0	hsa-miR-4789-5p	0	0
3.41337	0	0.292965	0	1	4	miRNA	FALSE	hsa-miR-3941	189	0	1	0	0.988397	FALSE	0	hsa-miR-3941	0	0
3.41337	0	0.292965	0	1	4	miRNA	FALSE	hsa-miR-4719	189	0	1	0	0.988397	FALSE	0	hsa-miR-4719	0	0
3.41337	0	0.292965	0	1	4	miRNA	FALSE	hsa-miR-603	189	0	1	0	0.988397	FALSE	0	hsa-miR-603	0	0
3.41337	0	0.292965	0	1	4	miRNA	FALSE	hsa-miR-8485	189	0	1	0	0.988397	FALSE	0	hsa-miR-8485	0	0
3.41337	0	0.292965	0	1	4	miRNA	FALSE	hsa-miR-576-5p	189	0	1	0	0.988397	FALSE	0	hsa-miR-576-5p	0	0
3.41337	0	0.292965	0	1	4	miRNA	FALSE	hsa-miR-4263	189	0	1	0	0.988397	FALSE	0	hsa-miR-4263	0	0
3.41337	0	0.292965	0	1	4	miRNA	FALSE	hsa-miR-4735-5p	189	0	1	0	0.988397	FALSE	0	hsa-miR-4735-5p	0	0
3.41337	0	0.292965	0	1	4	miRNA	FALSE	hsa-miR-670-5p	189	0	1	0	0.988397	FALSE	0	hsa-miR-670-5p	0	0
3.41337	0	0.292965	0	1	4	miRNA	FALSE	hsa-miR-5193	189	0	1	0	0.988397	FALSE	0	hsa-miR-5193	0	0
3.41337	0	0.292965	0	1	4	miRNA	FALSE	hsa-miR-4497	189	0	1	0	0.988397	FALSE	0	hsa-miR-4497	0	0
3.41337	0	0.292965	0	1	4	miRNA	FALSE	hsa-miR-1-5p	189	0	1	0	0.988397	FALSE	0	hsa-miR-1-5p	0	0
3.41337	0	0.292965	0	1	4	miRNA	FALSE	hsa-miR-101-5p	189	0	1	0	0.988397	FALSE	0	hsa-miR-101-5p	0	0
3.41337	0	0.292965	0	1	4	miRNA	FALSE	hsa-miR-942-3p	189	0	1	0	0.988397	FALSE	0	hsa-miR-942-3p	0	0
3.41337	0	0.292965	0	1	4	miRNA	FALSE	hsa-miR-206	189	0	1	0	0.988397	FALSE	0	hsa-miR-206	0	0
3.41337	0	0.292965	0	1	4	miRNA	FALSE	hsa-miR-199a-3p	189	0	1	0	0.988397	FALSE	0	hsa-miR-199a-3p	0	0
3.41337	0	0.292965	0	1	4	miRNA	FALSE	hsa-miR-3126-5p	189	0	1	0	0.988397	FALSE	0	hsa-miR-3126-5p	0	0
3.41337	0	0.292965	0	1	4	miRNA	FALSE	hsa-miR-6875-5p	189	0	1	0	0.988397	FALSE	0	hsa-miR-6875-5p	0	0
3.41337	0	0.292965	0	1	4	miRNA	FALSE	hsa-miR-141-3p	189	0	1	0	0.988397	FALSE	0	hsa-miR-141-3p	0	0
3.41337	0	0.292965	0	1	4	miRNA	FALSE	hsa-miR-146a-5p	189	0	1	0	0.988397	FALSE	0	hsa-miR-146a-5p	0	0
3.41337	0	0.292965	0	1	4	miRNA	FALSE	hsa-miR-19a-5p	189	0	1	0	0.988397	FALSE	0	hsa-miR-19a-5p	0	0
3.41337	0	0.292965	0	1	4	miRNA	FALSE	hsa-miR-19b-1-5p	189	0	1	0	0.988397	FALSE	0	hsa-miR-19b-1-5p	0	0
3.41337	0	0.292965	0	1	4	miRNA	FALSE	hsa-miR-200a-3p	189	0	1	0	0.988397	FALSE	0	hsa-miR-200a-3p	0	0
3.41337	0	0.292965	0	1	4	miRNA	FALSE	hsa-miR-223-3p	189	0	1	0	0.988397	FALSE	0	hsa-miR-223-3p	0	0
3.41337	0	0.292965	0	1	4	miRNA	FALSE	hsa-miR-24-3p	189	0	1	0	0.988397	FALSE	0	hsa-miR-24-3p	0	0
3.41337	0	0.292965	0	1	4	miRNA	FALSE	hsa-miR-3127-3p	189	0	1	0	0.988397	FALSE	0	hsa-miR-3127-3p	0	0
3.41337	0	0.292965	0	1	4	miRNA	FALSE	hsa-miR-326	189	0	1	0	0.988397	FALSE	0	hsa-miR-326	0	0
3.41337	0	0.292965	0	1	4	miRNA	FALSE	hsa-miR-339-5p	189	0	1	0	0.988397	FALSE	0	hsa-miR-339-5p	0	0
3.41337	0	0.292965	0	1	4	miRNA	FALSE	hsa-miR-33a-3p	189	0	1	0	0.988397	FALSE	0	hsa-miR-33a-3p	0	0
3.41337	0	0.292965	0	1	4	miRNA	FALSE	hsa-miR-340-3p	189	0	1	0	0.988397	FALSE	0	hsa-miR-340-3p	0	0
3.41337	0	0.292965	0	1	4	miRNA	FALSE	hsa-miR-374a-3p	189	0	1	0	0.988397	FALSE	0	hsa-miR-374a-3p	0	0
3.41337	0	0.292965	0	1	4	miRNA	FALSE	hsa-miR-409-5p	189	0	1	0	0.988397	FALSE	0	hsa-miR-409-5p	0	0
3.41337	0	0.292965	0	1	4	miRNA	FALSE	hsa-miR-4792	189	0	1	0	0.988397	FALSE	0	hsa-miR-4792	0	0
3.41337	0	0.292965	0	1	4	miRNA	FALSE	hsa-miR-511-5p	189	0	1	0	0.988397	FALSE	0	hsa-miR-511-5p	0	0
3.41337	0	0.292965	0	1	4	miRNA	FALSE	hsa-miR-520a-3p	189	0	1	0	0.988397	FALSE	0	hsa-miR-520a-3p	0	0
3.41337	0	0.292965	0	1	4	miRNA	FALSE	hsa-miR-523-3p	189	0	1	0	0.988397	FALSE	0	hsa-miR-523-3p	0	0
3.41337	0	0.292965	0	1	4	miRNA	FALSE	hsa-miR-526b-5p	189	0	1	0	0.988397	FALSE	0	hsa-miR-526b-5p	0	0
3.41337	0	0.292965	0	1	4	miRNA	FALSE	hsa-miR-532-5p	189	0	1	0	0.988397	FALSE	0	hsa-miR-532-5p	0	0
3.41337	0	0.292965	0	1	4	miRNA	FALSE	hsa-miR-629-5p	189	0	1	0	0.988397	FALSE	0	hsa-miR-629-5p	0	0
3.41337	0	0.292965	0	1	4	miRNA	FALSE	hsa-miR-642b-5p	189	0	1	0	0.988397	FALSE	0	hsa-miR-642b-5p	0	0
3.41337	0	0.292965	0	1	4	miRNA	FALSE	hsa-miR-708-3p	189	0	1	0	0.988397	FALSE	0	hsa-miR-708-3p	0	0
3.41337	0	0.292965	0	1	4	miRNA	FALSE	hsa-miR-766-5p	189	0	1	0	0.988397	FALSE	0	hsa-miR-766-5p	0	0
3.41337	0	0.292965	0	1	4	miRNA	FALSE	hsa-miR-874-3p	189	0	1	0	0.988397	FALSE	0	hsa-miR-874-3p	0	0
3.41337	0	0.292965	0	1	4	miRNA	FALSE	hsa-miR-876-3p	189	0	1	0	0.988397	FALSE	0	hsa-miR-876-3p	0	0
3.41337	0	0.292965	0	1	4	miRNA	FALSE	hsa-miR-99b-5p	189	0	1	0	0.988397	FALSE	0	hsa-miR-99b-5p	0	0
3.41337	0	0.292965	0	1	4	miRNA	FALSE	hsa-miR-3168	189	0	1	0	0.988397	FALSE	0	hsa-miR-3168	0	0
