# Supplementary material for: Integrated bulk and scRNA sequence identified anoikis-related diagnostic biomarkers and potential association with immune infiltration in type A aortic dissection
Source: Aging (Albany NY). 2023 Oct 24;15(20):11268–85. doi: 10.18632/aging.205126 (PMC10637813; doi:10.18632/aging.205126)
Supplement: Supplementary Table 9 [file aging-15-205126-s009.xlsx]

## Sheet: TableS9
Supplmentary Table 9. Results of immune cell infiltration by ssGSEA.
	group	Activated CD8 T cell	Central memory CD8 T cell	Effector memeory CD8 T cell	Activated CD4 T cell	Central memory CD4 T cell	Effector memeory CD4 T cell	T follicular helper cell	Gamma delta T cell	Type 1 T helper cell	Type 17 T helper cell	Type 2 T helper cell	Regulatory T cell	Activated B cell	Immature B cell	Memory B cell	Natural killer cell	CD56bright natural killer cell	CD56dim natural killer cell	Myeloid derived suppressor cell	Natural killer T cell	Activated dendritic cell	Plasmacytoid dendritic cell	Immature dendritic cell	Macrophage	Eosinophil	Mast cell	Monocyte	Neutrophil
Normal1	HC	0.564457	0.743043	0.709521	0.430184	0.957426	0.791774	0.552165	0.700054	0.540053	0.288996	0.534058	0.771623	0.24437	0.512236	0.586527	0.883265	0.588375	0.643073	0.671479	0.522897	0.628059	0.788178	0.831722	0.549712	0.362264	0.575398	0.772488	0.140493
Normal10	HC	0.488096	0.726565	0.661276	0.333497	0.986523	0.643863	0.533967	0.684516	0.550556	0.341049	0.439791	0.689831	0.165506	0.512987	0.495214	0.888421	0.578476	0.69045	0.626037	0.525858	0.534898	0.82285	0.826314	0.548746	0.340736	0.44854	0.757534	0.0625537
Normal2	HC	0.545326	0.781828	0.677017	0.465659	0.948548	0.70369	0.568059	0.709671	0.569813	0.289353	0.544891	0.670683	0.217724	0.456874	0.609597	0.878373	0.573265	0.641473	0.577537	0.53795	0.568912	0.801303	0.746792	0.428309	0.41235	0.453345	0.740531	0.0388781
Normal3	HC	0.470296	0.724436	0.62734	0.437653	0.938361	0.684498	0.537699	0.656478	0.53684	0.296853	0.46957	0.670819	0.0895248	0.45983	0.606186	0.843673	0.562116	0.678204	0.516885	0.485191	0.485847	0.791344	0.717018	0.422544	0.398784	0.468875	0.786343	0.0703552
Normal4	HC	0.490901	0.73417	0.648947	0.498445	0.970886	0.7591	0.567614	0.695502	0.61716	0.321216	0.544455	0.710582	0.227824	0.573742	0.537888	0.882862	0.606009	0.60574	0.730302	0.528962	0.586715	0.785427	0.889945	0.512213	0.531563	0.517152	0.787088	0.328654
Normal5	HC	0.452837	0.696192	0.694284	0.464664	0.963662	0.667492	0.524477	0.690907	0.575708	0.329033	0.522104	0.694884	0.17039	0.435379	0.581434	0.873559	0.564238	0.638547	0.610923	0.508973	0.599846	0.766455	0.788444	0.400096	0.382625	0.453335	0.78995	0.100566
Normal6	HC	0.619887	0.798308	0.718826	0.40129	0.969064	0.819335	0.652732	0.693046	0.655453	0.29275	0.583666	0.81619	0.280311	0.597562	0.581439	0.876892	0.618083	0.591993	0.745324	0.517925	0.595904	0.816742	0.850636	0.536752	0.505125	0.597973	0.751567	0.321225
Normal7	HC	0.576971	0.738882	0.680098	0.454915	0.956837	0.759353	0.562505	0.710691	0.623512	0.301547	0.539362	0.73168	0.222093	0.413968	0.50709	0.866683	0.571805	0.66474	0.662057	0.50909	0.575638	0.792831	0.807548	0.484268	0.35658	0.488056	0.752826	0
Normal8	HC	0.453248	0.694992	0.631709	0.430833	0.925125	0.652515	0.535996	0.649294	0.553066	0.317737	0.515325	0.713479	0.123145	0.447699	0.542135	0.865956	0.57646	0.642382	0.633608	0.523955	0.512891	0.759481	0.706205	0.45163	0.361347	0.452589	0.74884	0.0608212
Normal9	HC	0.592893	0.69976	0.641289	0.478687	0.973285	0.718659	0.582653	0.682118	0.576988	0.326665	0.476491	0.734067	0.210439	0.510421	0.587676	0.847059	0.589316	0.644222	0.648364	0.543941	0.645132	0.759658	0.841284	0.519832	0.370826	0.566362	0.788658	0.0381178
Patient10	AD	0.535194	0.825275	0.587666	0.53677	0.994172	0.675005	0.566242	0.685567	0.453901	0.301195	0.563556	0.762674	0.119275	0.411525	0.621492	0.832957	0.549331	0.691687	0.691853	0.518132	0.596301	0.783695	0.839998	0.529778	0.253286	0.556698	0.785819	0.125075
Patient1	AD	0.510984	0.672049	0.66213	0.485987	0.974225	0.776783	0.501627	0.64865	0.472919	0.347174	0.525193	0.62647	0.0747579	0.371251	0.626908	0.843641	0.568118	0.694849	0.47312	0.590388	0.571922	0.743182	0.794455	0.560248	0.402261	0.560805	0.812409	0.0215784
Patient2	AD	0.527974	0.869578	0.689639	0.541755	0.986643	0.786633	0.607677	0.765278	0.517462	0.358368	0.558003	0.858735	0.045049	0.452699	0.575592	0.851458	0.57776	0.684496	0.79873	0.588569	0.666631	0.811785	0.853376	0.589371	0.279393	0.622569	0.836421	0.148164
Patient3	AD	0.466115	0.783104	0.65892	0.55998	0.993358	0.743412	0.588036	0.746088	0.52408	0.336687	0.590116	0.823049	0.14416	0.41347	0.558531	0.839447	0.564613	0.631857	0.795515	0.572646	0.669255	0.80384	0.840299	0.605758	0.303823	0.557343	0.837332	0.204995
Patient4	AD	0.499538	0.750561	0.645513	0.502576	0.98159	0.732139	0.517644	0.663014	0.536973	0.350324	0.482949	0.629955	0.0234072	0.342994	0.570777	0.860913	0.544943	0.683298	0.663919	0.547936	0.619947	0.834636	0.828274	0.519613	0.229714	0.585774	0.807257	0.211309
Patient5	AD	0.537198	0.757239	0.69358	0.437781	0.985556	0.740079	0.590925	0.685963	0.48343	0.336617	0.508561	0.749853	0.115789	0.486509	0.615524	0.827013	0.568429	0.696412	0.715783	0.536299	0.63265	0.813116	0.826654	0.531404	0.248239	0.575728	0.809371	0.157416
Patient6	AD	0.372014	0.724229	0.593738	0.432055	0.994616	0.665716	0.533368	0.728358	0.4184	0.344036	0.539936	0.685248	0.0211087	0.243998	0.559594	0.809126	0.550991	0.648002	0.665211	0.544009	0.587554	0.783778	0.753905	0.541344	0.199883	0.478873	0.815026	0.0612248
Patient7	AD	0.472854	0.866936	0.678612	0.479463	0.987415	0.680411	0.544597	0.683421	0.503447	0.33368	0.537318	0.776953	0.0687401	0.390423	0.567198	0.834745	0.557082	0.679862	0.715224	0.544899	0.602464	0.810472	0.804993	0.517812	0.342908	0.600769	0.802295	0.265985
Patient8	AD	0.442659	0.858268	0.730402	0.571452	1	0.804285	0.601546	0.751126	0.560593	0.328529	0.571555	0.893822	0.149098	0.409839	0.563986	0.847649	0.605193	0.678468	0.789533	0.559441	0.687236	0.802628	0.853143	0.596571	0.339091	0.656521	0.80854	0.137604
Patient9	AD	0.454532	0.780098	0.669883	0.459601	0.951571	0.614562	0.549917	0.724693	0.537083	0.333123	0.486933	0.762837	0.0920753	0.444297	0.537221	0.867313	0.565358	0.726048	0.746333	0.548683	0.642278	0.872988	0.809523	0.552824	0.27444	0.512404	0.848318	0.287849
