# Supplementary material for: Integrated bulk and scRNA sequence identified anoikis-related diagnostic biomarkers and potential association with immune infiltration in type A aortic dissection
Source: Aging (Albany NY). 2023 Oct 24;15(20):11268–85. doi: 10.18632/aging.205126 (PMC10637813; doi:10.18632/aging.205126)
Supplement: Supplementary Table 10 [file aging-15-205126-s010.xlsx]

## Sheet: TableS10
Supplementary Table 10. Top10 markers of different clusters of macrophages.
p_val	avg_log2FC	pct.1	pct.2	p_val_adj	cluster	gene
0	1.72338	0.611	0.325	0	0	CCL2
0	1.66865	0.658	0.439	0	0	FN1
0	1.66213	0.883	0.579	0	0	FABP5
0	1.61647	0.758	0.525	0	0	SPP1
0	1.21062	0.909	0.671	0	0	CTSL
0	1.10949	0.986	0.901	0	0	CTSD
0	1.07611	0.743	0.386	0	0	CD36
1.16775e-195	1.23772	0.381	0.197	6.8693e-191	0	APOC1
1.32188e-122	1.54355	0.256	0.131	7.77593e-118	0	FABP4
0.00277625	1.07957	0.124	0.138	1	0	IGLC2
0	1.64632	0.682	0.339	0	1	EREG
0	1.18954	0.973	0.897	0	1	TIMP1
0	1.18628	0.844	0.567	0	1	VCAN
0	0.862765	0.639	0.331	0	1	CD300E
0	0.840302	0.996	0.947	0	1	SRGN
8.99566e-268	1.16725	0.612	0.381	5.2917e-263	1	THBS1
1.90426e-242	1.14689	0.533	0.302	1.12018e-237	1	G0S2
2.85465e-204	1.12396	0.654	0.46	1.67925e-199	1	IL1B
3.41343e-147	1.00339	0.492	0.313	2.00795e-142	1	CCL20
8.24604e-119	0.925419	0.691	0.558	4.85073e-114	1	CXCL8
0	2.06928	0.455	0.104	0	2	FCGBP
0	1.70613	0.937	0.36	0	2	C1QC
0	1.68748	0.995	0.843	0	2	CD74
0	1.60343	0.945	0.417	0	2	C1QB
0	1.5851	0.965	0.67	0	2	HLA-DRB5
0	1.55188	0.851	0.281	0	2	HLA-DQA1
0	1.54237	0.966	0.618	0	2	HLA-DPA1
0	1.51987	0.797	0.345	0	2	RGS1
0	1.50611	0.979	0.711	0	2	HLA-DRB1
0	1.45921	0.949	0.559	0	2	HLA-DPB1
0	4.06036	0.985	0.544	0	3	S100A8
0	4.00054	0.822	0.189	0	3	S100A12
0	3.55063	0.991	0.817	0	3	S100A9
0	2.1581	0.489	0.161	0	3	IL1R2
0	2.11503	0.861	0.338	0	3	FCN1
0	2.10711	0.933	0.819	0	3	LYZ
0	1.56889	0.554	0.112	0	3	MCEMP1
2.25248e-296	1.68661	0.667	0.323	1.32502e-291	3	G0S2
1.2544e-190	2.1208	0.515	0.275	7.37898e-186	3	RETN
3.55721e-179	1.98168	0.834	0.699	2.09253e-174	3	IFITM2
0	2.60024	0.852	0.316	0	4	F13A1
0	2.4513	0.783	0.291	0	4	SELENOP
0	2.37262	0.965	0.568	0	4	RNASE1
0	2.3261	0.841	0.375	0	4	PLTP
0	2.27056	0.897	0.301	0	4	LYVE1
0	2.04789	0.71	0.253	0	4	PMP22
0	1.9708	0.612	0.175	0	4	SLC40A1
0	1.96033	0.467	0.053	0	4	TTN
0	1.807	0.914	0.466	0	4	MRC1
0	1.67966	0.867	0.485	0	4	C1QA
9.5058e-16	1.3029	0.483	0.521	5.59178e-11	5	MGP
3.98497e-12	0.65311	0.224	0.366	2.34416e-07	5	F13A1
5.15875e-12	0.796939	0.975	0.999	3.03464e-07	5	MALAT1
8.07307e-10	0.753295	0.29	0.483	4.74898e-05	5	DSTN
7.03506e-08	0.651628	0.163	0.25	0.00413838	5	APOC1
4.42961e-06	1.3779	0.337	0.364	0.260572	5	TAGLN
2.07578e-05	1.0573	0.269	0.266	1	5	IGKC
0.000852932	1.00015	0.165	0.15	1	5	MYH11
0.00186744	1.23946	0.28	0.303	1	5	TPM2
0.00754472	0.976036	0.225	0.232	1	5	ACTA2
0	2.93851	0.887	0.181	0	6	STMN1
0	2.44225	0.65	0.026	0	6	CENPF
0	2.42838	0.693	0.012	0	6	MKI67
0	2.2083	0.617	0.021	0	6	TOP2A
2.73553e-292	1.92741	0.93	0.643	1.60918e-287	6	H2AFZ
2.49355e-284	1.95246	0.932	0.634	1.46683e-279	6	HMGN2
3.34886e-176	2.88898	0.665	0.285	1.96997e-171	6	HIST1H4C
1.07939e-59	2.13004	0.462	0.223	6.34954e-55	6	ACTA2
1.23696e-39	1.88426	0.565	0.355	7.27642e-35	6	TAGLN
0.00223539	4.3949	0.297	0.265	1	6	IGKC
0	4.55817	0.599	0.031	0	7	CXCL10
0	3.88564	0.929	0.393	0	7	ISG15
0	3.08155	0.41	0.013	0	7	CXCL11
0	3.06851	0.806	0.201	0	7	GBP1
0	3.00201	0.718	0.091	0	7	IFIT1
0	2.97142	0.817	0.182	0	7	TNFSF10
0	2.96973	0.737	0.148	0	7	IFIT2
0	2.91072	0.796	0.139	0	7	IFIT3
0	2.88125	0.739	0.121	0	7	APOBEC3A
0	2.64645	0.824	0.212	0	7	MX1
0	4.62283	0.948	0.243	0	8	DCN
0	4.19201	0.88	0.173	0	8	IGFBP5
0	3.8001	0.928	0.164	0	8	IGFBP6
0	3.67684	0.87	0.103	0	8	COL1A1
0	3.64819	0.954	0.157	0	8	COL1A2
0	3.5868	0.908	0.146	0	8	FBLN1
1.94782e-294	3.93824	0.719	0.166	1.14581e-289	8	PLA2G2A
9.15923e-287	3.69523	0.974	0.508	5.38792e-282	8	MGP
4.31983e-202	3.60699	0.922	0.559	2.54114e-197	8	CFD
9.25726e-197	4.04352	0.745	0.247	5.44558e-192	8	APOD
0	3.65917	0.193	0.005	0	9	CCL17
0	2.62415	0.986	0.368	0	9	HLA-DQA1
0	2.03845	0.187	0.003	0	9	CCL22
1.18013e-274	2.51325	0.996	0.514	6.94211e-270	9	HLA-DQB1
4.78046e-265	2.53483	0.998	0.62	2.81211e-260	9	HLA-DPB1
7.73596e-250	2.26435	1	0.847	4.55068e-245	9	HLA-DRA
1.64981e-245	2.06443	0.704	0.165	9.70502e-241	9	HLA-DQA2
8.45477e-241	2.1767	0.998	0.672	4.97352e-236	9	HLA-DPA1
6.46808e-238	2.30265	1	0.753	3.80485e-233	9	HLA-DRB1
6.57522e-210	2.61558	0.803	0.259	3.86787e-205	9	AREG
