# Supplementary material for: Integrated bulk and scRNA sequence identified anoikis-related diagnostic biomarkers and potential association with immune infiltration in type A aortic dissection
Source: Aging (Albany NY). 2023 Oct 24;15(20):11268–85. doi: 10.18632/aging.205126 (PMC10637813; doi:10.18632/aging.205126)
Supplement: Supplementary Table 11 [file aging-15-205126-s011.xlsx]

## Sheet: TableS11
Supplementary Table 11. Results of DEGs by differentiation trajectory analysis.
status	family	pval	qval	id	gene_short_name	num_cells_expressed
MTATP8P1	OK	negbinomial.size	8.3809e-18	1.18162e-17	MTATP8P1	MTATP8P1	10
MTATP6P1	OK	negbinomial.size	1.65331e-127	7.71964e-127	MTATP6P1	MTATP6P1	10157
MTCO3P12	OK	negbinomial.size	8.39972e-11	1.01553e-10	MTCO3P12	MTCO3P12	13
NOC2L	OK	negbinomial.size	2.19656e-23	3.43794e-23	NOC2L	NOC2L	20
HES4	OK	negbinomial.size	2.38934e-83	7.86942e-83	HES4	HES4	75
ISG15	OK	negbinomial.size	0	0	ISG15	ISG15	2800
TNFRSF4	OK	negbinomial.size	4.30969e-23	6.7059e-23	TNFRSF4	TNFRSF4	16
SDF4	OK	negbinomial.size	6.95715e-56	1.73391e-55	SDF4	SDF4	300
UBE2J2	OK	negbinomial.size	8.1281e-08	9.13628e-08	UBE2J2	UBE2J2	13
MXRA8	OK	negbinomial.size	9.54859e-170	5.79155e-169	MXRA8	MXRA8	30
AURKAIP1	OK	negbinomial.size	4.36769e-55	1.07629e-54	AURKAIP1	AURKAIP1	1182
CCNL2	OK	negbinomial.size	9.05035e-09	1.0402e-08	CCNL2	CCNL2	20
MRPL20	OK	negbinomial.size	1.64287e-35	3.1236e-35	MRPL20	MRPL20	1006
SSU72	OK	negbinomial.size	8.15957e-18	1.15094e-17	SSU72	SSU72	499
CDK11B	OK	negbinomial.size	0.000769888	0.000795872	CDK11B	CDK11B	13
NADK	OK	negbinomial.size	1.91e-38	3.80015e-38	NADK	NADK	22
GNB1	OK	negbinomial.size	2.38644e-42	5.03594e-42	GNB1	GNB1	2542
FAAP20	OK	negbinomial.size	6.47894e-07	7.15521e-07	FAAP20	FAAP20	83
SKI	OK	negbinomial.size	1.39504e-30	2.47351e-30	SKI	SKI	44
RER1	OK	negbinomial.size	1.7431e-19	2.53458e-19	RER1	RER1	475
AL139246.5	OK	negbinomial.size	0.0357022	0.0359842	AL139246.5	AL139246.5	10
TNFRSF14	OK	negbinomial.size	7.10851e-37	1.3785e-36	TNFRSF14	TNFRSF14	186
KCNAB2	OK	negbinomial.size	5.83646e-13	7.41326e-13	KCNAB2	KCNAB2	90
RPL22	OK	negbinomial.size	4.8899e-42	1.02482e-41	RPL22	RPL22	6449
ACOT7	OK	negbinomial.size	7.7095e-79	2.41331e-78	ACOT7	ACOT7	12
KLHL21	OK	negbinomial.size	1.97775e-07	2.20847e-07	KLHL21	KLHL21	15
CAMTA1	OK	negbinomial.size	1.03546e-20	1.53701e-20	CAMTA1	CAMTA1	184
VAMP3	OK	negbinomial.size	8.11785e-09	9.34246e-09	VAMP3	VAMP3	121
PER3	OK	negbinomial.size	1.69106e-98	6.32443e-98	PER3	PER3	20
TNFRSF9	OK	negbinomial.size	2.74347e-27	4.61223e-27	TNFRSF9	TNFRSF9	15
PARK7	OK	negbinomial.size	3.70704e-79	1.16698e-78	PARK7	PARK7	2939
ERRFI1	OK	negbinomial.size	4.31384e-37	8.3894e-37	ERRFI1	ERRFI1	84
RERE	OK	negbinomial.size	2.44788e-29	4.2553e-29	RERE	RERE	54
ENO1	OK	negbinomial.size	0	0	ENO1	ENO1	10639
SLC2A5	OK	negbinomial.size	3.05028e-119	1.35112e-118	SLC2A5	SLC2A5	70
GPR157	OK	negbinomial.size	1.25819e-35	2.39666e-35	GPR157	GPR157	21
SLC25A33	OK	negbinomial.size	1.44639e-06	1.58281e-06	SLC25A33	SLC25A33	12
CLSTN1	OK	negbinomial.size	3.26988e-16	4.45932e-16	CLSTN1	CLSTN1	26
LZIC	OK	negbinomial.size	1.65921e-09	1.93939e-09	LZIC	LZIC	60
RBP7	OK	negbinomial.size	5.36778e-151	2.91775e-150	RBP7	RBP7	253
KIF1B	OK	negbinomial.size	4.75588e-43	1.01091e-42	KIF1B	KIF1B	492
PGD	OK	negbinomial.size	1.50376e-175	9.43859e-175	PGD	PGD	701
TARDBP	OK	negbinomial.size	5.32857e-12	6.63067e-12	TARDBP	TARDBP	34
SRM	OK	negbinomial.size	2.41358e-175	1.51337e-174	SRM	SRM	516
ANGPTL7	OK	negbinomial.size	4.70428e-65	1.29521e-64	ANGPTL7	ANGPTL7	15
AGTRAP	OK	negbinomial.size	9.04767e-109	3.68035e-108	AGTRAP	AGTRAP	213
MTHFR	OK	negbinomial.size	2.38069e-19	3.4535e-19	MTHFR	MTHFR	86
KIAA2013	OK	negbinomial.size	0.00419168	0.00427472	KIAA2013	KIAA2013	21
PLOD1	OK	negbinomial.size	7.38623e-29	1.27603e-28	PLOD1	PLOD1	15
MIIP	OK	negbinomial.size	2.71082e-11	3.31334e-11	MIIP	MIIP	11
TNFRSF1B	OK	negbinomial.size	0	0	TNFRSF1B	TNFRSF1B	3116
VPS13D	OK	negbinomial.size	2.02267e-07	2.25741e-07	VPS13D	VPS13D	17
DHRS3	OK	negbinomial.size	1.89163e-40	3.87175e-40	DHRS3	DHRS3	188
PDPN	OK	negbinomial.size	1.68058e-70	4.86543e-70	PDPN	PDPN	25
PRDM2	OK	negbinomial.size	0.00290784	0.00297635	PRDM2	PRDM2	132
TMEM51	OK	negbinomial.size	3.45427e-37	6.73698e-37	TMEM51	TMEM51	13
EFHD2	OK	negbinomial.size	0	0	EFHD2	EFHD2	6272
DDI2	OK	negbinomial.size	8.57186e-12	1.06126e-11	DDI2	DDI2	15
PLEKHM2	OK	negbinomial.size	3.28968e-48	7.48611e-48	PLEKHM2	PLEKHM2	153
FBLIM1	OK	negbinomial.size	2.58186e-44	5.58688e-44	FBLIM1	FBLIM1	19
AL450998.2	OK	negbinomial.size	7.69509e-06	8.27746e-06	AL450998.2	AL450998.2	22
SPEN	OK	negbinomial.size	9.36676e-12	1.15944e-11	SPEN	SPEN	304
SZRD1	OK	negbinomial.size	2.90776e-30	5.12898e-30	SZRD1	SZRD1	123
NECAP2	OK	negbinomial.size	9.49427e-16	1.28591e-15	NECAP2	NECAP2	130
NBPF1	OK	negbinomial.size	2.02398e-101	7.74932e-101	NBPF1	NBPF1	14
ATP13A2	OK	negbinomial.size	1.95399e-25	3.17763e-25	ATP13A2	ATP13A2	14
SDHB	OK	negbinomial.size	2.96678e-08	3.36689e-08	SDHB	SDHB	80
RCC2	OK	negbinomial.size	8.1837e-33	1.49965e-32	RCC2	RCC2	84
IGSF21	OK	negbinomial.size	0	0	IGSF21	IGSF21	193
AL365209.1	OK	negbinomial.size	2.41049e-137	1.20348e-136	AL365209.1	AL365209.1	10
MRTO4	OK	negbinomial.size	3.4268e-59	8.89138e-59	MRTO4	MRTO4	74
AKR7A2	OK	negbinomial.size	7.1591e-14	9.29757e-14	AKR7A2	AKR7A2	11
CAPZB	OK	negbinomial.size	1.46671e-89	5.09646e-89	CAPZB	CAPZB	5999
MICOS10	OK	negbinomial.size	2.89071e-35	5.48081e-35	MICOS10	MICOS10	777
NBL1	OK	negbinomial.size	3.01387e-106	1.20437e-105	NBL1	NBL1	18
PLA2G2A	OK	negbinomial.size	0	0	PLA2G2A	PLA2G2A	393
CDA	OK	negbinomial.size	0	0	CDA	CDA	44
DDOST	OK	negbinomial.size	1.77671e-26	2.93848e-26	DDOST	DDOST	139
HP1BP3	OK	negbinomial.size	1.17327e-75	3.5794e-75	HP1BP3	HP1BP3	711
EIF4G3	OK	negbinomial.size	7.95342e-35	1.50101e-34	EIF4G3	EIF4G3	249
ECE1	OK	negbinomial.size	3.01686e-201	2.13656e-200	ECE1	ECE1	17
USP48	OK	negbinomial.size	1.65521e-06	1.80907e-06	USP48	USP48	39
HSPG2	OK	negbinomial.size	2.89424e-137	1.44265e-136	HSPG2	HSPG2	33
CDC42	OK	negbinomial.size	2.77476e-44	5.99583e-44	CDC42	CDC42	8579
C1QA	OK	negbinomial.size	0	0	C1QA	C1QA	8518
C1QC	OK	negbinomial.size	0	0	C1QC	C1QC	7105
C1QB	OK	negbinomial.size	0	0	C1QB	C1QB	8362
LUZP1	OK	negbinomial.size	4.78944e-59	1.23955e-58	LUZP1	LUZP1	134
HNRNPR	OK	negbinomial.size	2.51389e-50	5.87117e-50	HNRNPR	HNRNPR	794
ID3	OK	negbinomial.size	5.83256e-191	3.9221e-190	ID3	ID3	276
RPL11	OK	negbinomial.size	5.45827e-169	3.29432e-168	RPL11	RPL11	17776
ELOA	OK	negbinomial.size	8.59863e-07	9.47055e-07	ELOA	ELOA	20
PITHD1	OK	negbinomial.size	5.91306e-40	1.20303e-39	PITHD1	PITHD1	156
LYPLA2	OK	negbinomial.size	4.19816e-29	7.26906e-29	LYPLA2	LYPLA2	20
FUCA1	OK	negbinomial.size	0	0	FUCA1	FUCA1	429
PNRC2	OK	negbinomial.size	2.1136e-10	2.5274e-10	PNRC2	PNRC2	495
SRSF10	OK	negbinomial.size	2.54352e-43	5.42347e-43	SRSF10	SRSF10	384
SRRM1	OK	negbinomial.size	6.42781e-44	1.38164e-43	SRRM1	SRRM1	1734
CLIC4	OK	negbinomial.size	1.31805e-63	3.58224e-63	CLIC4	CLIC4	126
RUNX3	OK	negbinomial.size	3.72101e-81	1.1947e-80	RUNX3	RUNX3	87
SYF2	OK	negbinomial.size	3.34953e-07	3.72197e-07	SYF2	SYF2	847
RSRP1	OK	negbinomial.size	9.08826e-82	2.93488e-81	RSRP1	RSRP1	1413
TMEM50A	OK	negbinomial.size	1.17613e-16	1.6191e-16	TMEM50A	TMEM50A	1046
MACO1	OK	negbinomial.size	2.33013e-05	2.48293e-05	MACO1	MACO1	15
STMN1	OK	negbinomial.size	0	0	STMN1	STMN1	617
ZNF593	OK	negbinomial.size	1.14573e-54	2.80973e-54	ZNF593	ZNF593	78
SH3BGRL3	OK	negbinomial.size	0	0	SH3BGRL3	SH3BGRL3	18555
UBXN11	OK	negbinomial.size	5.87155e-68	1.66987e-67	UBXN11	UBXN11	21
CD52	OK	negbinomial.size	0	0	CD52	CD52	4070
HMGN2	OK	negbinomial.size	1.95413e-268	1.89714e-267	HMGN2	HMGN2	2822
RPS6KA1	OK	negbinomial.size	1.52938e-51	3.61736e-51	RPS6KA1	RPS6KA1	88
ARID1A	OK	negbinomial.size	0.0353602	0.0356453	ARID1A	ARID1A	281
NUDC	OK	negbinomial.size	8.45475e-32	1.52604e-31	NUDC	NUDC	316
WASF2	OK	negbinomial.size	1.73753e-138	8.72466e-138	WASF2	WASF2	2662
FGR	OK	negbinomial.size	0	0	FGR	FGR	807
IFI6	OK	negbinomial.size	0	0	IFI6	IFI6	2918
STX12	OK	negbinomial.size	4.97995e-25	8.0409e-25	STX12	STX12	189
THEMIS2	OK	negbinomial.size	8.58489e-92	3.03468e-91	THEMIS2	THEMIS2	561
RPA2	OK	negbinomial.size	1.4822e-19	2.15829e-19	RPA2	RPA2	17
PTAFR	OK	negbinomial.size	6.09363e-122	2.76107e-121	PTAFR	PTAFR	370
DNAJC8	OK	negbinomial.size	9.34837e-33	1.71052e-32	DNAJC8	DNAJC8	915
ATP5IF1	OK	negbinomial.size	2.66539e-37	5.21833e-37	ATP5IF1	ATP5IF1	1361
SESN2	OK	negbinomial.size	5.13326e-17	7.12423e-17	SESN2	SESN2	45
PHACTR4	OK	negbinomial.size	3.60231e-65	9.93147e-65	PHACTR4	PHACTR4	291
SNHG3	OK	negbinomial.size	1.62205e-23	2.5446e-23	SNHG3	SNHG3	75
SNHG12	OK	negbinomial.size	1.93641e-73	5.76968e-73	SNHG12	SNHG12	286
TAF12	OK	negbinomial.size	0.439415	0.439702	TAF12	TAF12	12
RAB42	OK	negbinomial.size	5.15739e-130	2.45487e-129	RAB42	RAB42	31
GMEB1	OK	negbinomial.size	0.00354362	0.00361743	GMEB1	GMEB1	11
YTHDF2	OK	negbinomial.size	7.14488e-07	7.88498e-07	YTHDF2	YTHDF2	105
SRSF4	OK	negbinomial.size	2.91647e-12	3.65215e-12	SRSF4	SRSF4	217
LAPTM5	OK	negbinomial.size	0	0	LAPTM5	LAPTM5	17070
SDC3	OK	negbinomial.size	7.21611e-229	5.77854e-228	SDC3	SDC3	183
PUM1	OK	negbinomial.size	5.79589e-12	7.2078e-12	PUM1	PUM1	201
ZCCHC17	OK	negbinomial.size	3.08098e-13	3.93456e-13	ZCCHC17	ZCCHC17	23
FABP3	OK	negbinomial.size	2.12145e-26	3.50675e-26	FABP3	FABP3	12
TINAGL1	OK	negbinomial.size	3.32216e-38	6.58839e-38	TINAGL1	TINAGL1	19
PTP4A2	OK	negbinomial.size	1.57316e-122	7.15988e-122	PTP4A2	PTP4A2	3522
KHDRBS1	OK	negbinomial.size	1.12056e-21	1.69286e-21	KHDRBS1	KHDRBS1	768
KPNA6	OK	negbinomial.size	1.7835e-09	2.08268e-09	KPNA6	KPNA6	19
TXLNA	OK	negbinomial.size	6.9873e-07	7.71247e-07	TXLNA	TXLNA	24
EIF3I	OK	negbinomial.size	1.09404e-38	2.18879e-38	EIF3I	EIF3I	537
LCK	OK	negbinomial.size	2.04135e-59	5.30335e-59	LCK	LCK	12
HDAC1	OK	negbinomial.size	1.17443e-17	1.65126e-17	HDAC1	HDAC1	19
MARCKSL1	OK	negbinomial.size	1.93123e-296	2.05752e-295	MARCKSL1	MARCKSL1	398
BSDC1	OK	negbinomial.size	1.95817e-06	2.13676e-06	BSDC1	BSDC1	10
ZBTB8OS	OK	negbinomial.size	1.21168e-06	1.32953e-06	ZBTB8OS	ZBTB8OS	43
RBBP4	OK	negbinomial.size	4.04894e-09	4.69325e-09	RBBP4	RBBP4	132
YARS	OK	negbinomial.size	1.73133e-15	2.33256e-15	YARS	YARS	16
RNF19B	OK	negbinomial.size	7.41186e-38	1.46326e-37	RNF19B	RNF19B	46
AK2	OK	negbinomial.size	1.49601e-22	2.30497e-22	AK2	AK2	46
PHC2	OK	negbinomial.size	6.10617e-209	4.47445e-208	PHC2	PHC2	1074
SMIM12	OK	negbinomial.size	2.02347e-05	2.15691e-05	SMIM12	SMIM12	25
GJA4	OK	negbinomial.size	1.28657e-20	1.90698e-20	GJA4	GJA4	11
SFPQ	OK	negbinomial.size	2.16409e-33	4.00279e-33	SFPQ	SFPQ	3576
ZMYM4	OK	negbinomial.size	3.25712e-08	3.69366e-08	ZMYM4	ZMYM4	18
KIAA0319L	OK	negbinomial.size	3.92751e-09	4.55422e-09	KIAA0319L	KIAA0319L	12
PSMB2	OK	negbinomial.size	3.51851e-37	6.85572e-37	PSMB2	PSMB2	375
CLSPN	OK	negbinomial.size	0	0	CLSPN	CLSPN	131
AGO4	OK	negbinomial.size	2.63785e-05	2.8079e-05	AGO4	AGO4	16
AGO1	OK	negbinomial.size	1.91765e-13	2.46227e-13	AGO1	AGO1	23
AGO3	OK	negbinomial.size	0.000142373	0.000149167	AGO3	AGO3	90
TRAPPC3	OK	negbinomial.size	5.87045e-05	6.19187e-05	TRAPPC3	TRAPPC3	35
MAP7D1	OK	negbinomial.size	1.42639e-16	1.96141e-16	MAP7D1	MAP7D1	141
THRAP3	OK	negbinomial.size	6.08764e-33	1.11689e-32	THRAP3	THRAP3	409
EVA1B	OK	negbinomial.size	2.48753e-22	3.81441e-22	EVA1B	EVA1B	69
STK40	OK	negbinomial.size	3.84151e-53	9.26866e-53	STK40	STK40	31
LSM10	OK	negbinomial.size	1.41452e-31	2.54864e-31	LSM10	LSM10	112
MRPS15	OK	negbinomial.size	2.51852e-38	5.00599e-38	MRPS15	MRPS15	150
CSF3R	OK	negbinomial.size	0	0	CSF3R	CSF3R	238
ZC3H12A	OK	negbinomial.size	2.89197e-25	4.68931e-25	ZC3H12A	ZC3H12A	88
MEAF6	OK	negbinomial.size	1.30046e-09	1.52529e-09	MEAF6	MEAF6	25
GNL2	OK	negbinomial.size	3.16138e-09	3.67349e-09	GNL2	GNL2	18
CDCA8	OK	negbinomial.size	1.88522e-100	7.15099e-100	CDCA8	CDCA8	10
C1orf122	OK	negbinomial.size	1.45759e-52	3.49615e-52	C1orf122	C1orf122	209
MTF1	OK	negbinomial.size	2.62262e-45	5.74818e-45	MTF1	MTF1	31
SF3A3	OK	negbinomial.size	1.99703e-16	2.73932e-16	SF3A3	SF3A3	42
FHL3	OK	negbinomial.size	1.45171e-19	2.11441e-19	FHL3	FHL3	20
UTP11	OK	negbinomial.size	4.67191e-17	6.48835e-17	UTP11	UTP11	23
POU3F1	OK	negbinomial.size	1.24381e-36	2.39684e-36	POU3F1	POU3F1	14
RRAGC	OK	negbinomial.size	3.47322e-07	3.85801e-07	RRAGC	RRAGC	17
AKIRIN1	OK	negbinomial.size	2.18541e-06	2.3809e-06	AKIRIN1	AKIRIN1	94
NDUFS5	OK	negbinomial.size	1.83868e-80	5.86348e-80	NDUFS5	NDUFS5	3431
MACF1	OK	negbinomial.size	9.50591e-37	1.84049e-36	MACF1	MACF1	1466
PABPC4	OK	negbinomial.size	3.08384e-81	9.90647e-81	PABPC4	PABPC4	2025
CAP1	OK	negbinomial.size	4.32892e-87	1.46919e-86	CAP1	CAP1	6853
PPT1	OK	negbinomial.size	5.59962e-61	1.47987e-60	PPT1	PPT1	1694
RLF	OK	negbinomial.size	2.9656e-05	3.15404e-05	RLF	RLF	47
ZMPSTE24	OK	negbinomial.size	1.00904e-22	1.56017e-22	ZMPSTE24	ZMPSTE24	17
SMAP2	OK	negbinomial.size	1.46938e-270	1.43335e-269	SMAP2	SMAP2	2934
NFYC	OK	negbinomial.size	1.99667e-07	2.2292e-07	NFYC	NFYC	15
CITED4	OK	negbinomial.size	1.09358e-18	1.56488e-18	CITED4	CITED4	10
HIVEP3	OK	negbinomial.size	3.53579e-34	6.61989e-34	HIVEP3	HIVEP3	21
PPCS	OK	negbinomial.size	1.59027e-10	1.90945e-10	PPCS	PPCS	151
YBX1	OK	negbinomial.size	8.41493e-257	7.84625e-256	YBX1	YBX1	13329
SVBP	OK	negbinomial.size	0.00158106	0.00162483	SVBP	SVBP	20
EBNA1BP2	OK	negbinomial.size	5.17284e-62	1.38017e-61	EBNA1BP2	EBNA1BP2	66
CDC20	OK	negbinomial.size	4.58709e-241	3.87059e-240	CDC20	CDC20	57
ELOVL1	OK	negbinomial.size	3.00663e-21	4.50774e-21	ELOVL1	ELOVL1	104
MED8	OK	negbinomial.size	6.13686e-13	7.78836e-13	MED8	MED8	16
ATP6V0B	OK	negbinomial.size	2.10039e-203	1.5014e-202	ATP6V0B	ATP6V0B	7460
RNF220	OK	negbinomial.size	3.02396e-08	3.43115e-08	RNF220	RNF220	15
RPS8	OK	negbinomial.size	8.6403e-135	4.24122e-134	RPS8	RPS8	18728
PLK3	OK	negbinomial.size	4.08315e-32	7.39603e-32	PLK3	PLK3	361
UROD	OK	negbinomial.size	1.78265e-17	2.49498e-17	UROD	UROD	19
PRDX1	OK	negbinomial.size	0	0	PRDX1	PRDX1	5779
AKR1A1	OK	negbinomial.size	2.79694e-122	1.26919e-121	AKR1A1	AKR1A1	818
NASP	OK	negbinomial.size	3.32429e-251	2.9686e-250	NASP	NASP	732
GPBP1L1	OK	negbinomial.size	0.0510581	0.0513515	GPBP1L1	GPBP1L1	32
PIK3R3	OK	negbinomial.size	1.55682e-62	4.1811e-62	PIK3R3	PIK3R3	20
UQCRH	OK	negbinomial.size	2.91215e-30	5.13525e-30	UQCRH	UQCRH	4268
MKNK1	OK	negbinomial.size	5.33347e-41	1.10158e-40	MKNK1	MKNK1	240
EFCAB14	OK	negbinomial.size	4.69901e-09	5.43853e-09	EFCAB14	EFCAB14	143
CMPK1	OK	negbinomial.size	8.19175e-22	1.24214e-21	CMPK1	CMPK1	167
CDKN2C	OK	negbinomial.size	2.69705e-104	1.05843e-103	CDKN2C	CDKN2C	43
RNF11	OK	negbinomial.size	4.76745e-05	5.05196e-05	RNF11	RNF11	20
EPS15	OK	negbinomial.size	6.51443e-126	3.01415e-125	EPS15	EPS15	289
OSBPL9	OK	negbinomial.size	1.09477e-16	1.50878e-16	OSBPL9	OSBPL9	16
NRDC	OK	negbinomial.size	2.94648e-06	3.19846e-06	NRDC	NRDC	342
BTF3L4	OK	negbinomial.size	7.18814e-15	9.58524e-15	BTF3L4	BTF3L4	153
PRPF38A	OK	negbinomial.size	0.000352418	0.000366414	PRPF38A	PRPF38A	23
TUT4	OK	negbinomial.size	3.04154e-08	3.45046e-08	TUT4	TUT4	41
ZYG11B	OK	negbinomial.size	3.66318e-24	5.81967e-24	ZYG11B	ZYG11B	33
SCP2	OK	negbinomial.size	1.55162e-51	3.66855e-51	SCP2	SCP2	372
PODN	OK	negbinomial.size	0	0	PODN	PODN	169
CZIB	OK	negbinomial.size	3.32341e-17	4.63236e-17	CZIB	CZIB	17
MAGOH	OK	negbinomial.size	4.26187e-11	5.18328e-11	MAGOH	MAGOH	115
HSPB11	OK	negbinomial.size	2.48995e-31	4.46922e-31	HSPB11	HSPB11	33
TMEM59	OK	negbinomial.size	1.00648e-32	1.83996e-32	TMEM59	TMEM59	1416
SSBP3	OK	negbinomial.size	2.89496e-49	6.69986e-49	SSBP3	SSBP3	24
USP24	OK	negbinomial.size	0.00181633	0.00186441	USP24	USP24	11
PLPP3	OK	negbinomial.size	0	0	PLPP3	PLPP3	185
MYSM1	OK	negbinomial.size	4.71417e-08	5.33217e-08	MYSM1	MYSM1	15
JUN	OK	negbinomial.size	2.80392e-276	2.79753e-275	JUN	JUN	14268
NFIA	OK	negbinomial.size	0	0	NFIA	NFIA	201
TM2D1	OK	negbinomial.size	0.00140926	0.00145046	TM2D1	TM2D1	14
USP1	OK	negbinomial.size	3.46006e-67	9.7724e-67	USP1	USP1	95
DOCK7	OK	negbinomial.size	9.91295e-37	1.91688e-36	DOCK7	DOCK7	24
ATG4C	OK	negbinomial.size	1.16911e-41	2.43522e-41	ATG4C	ATG4C	10
JAK1	OK	negbinomial.size	3.10946e-61	8.24612e-61	JAK1	JAK1	1658
LEPROT	OK	negbinomial.size	1.54566e-32	2.81806e-32	LEPROT	LEPROT	675
PDE4B	OK	negbinomial.size	0	0	PDE4B	PDE4B	1578
TCTEX1D1	OK	negbinomial.size	4.04832e-37	7.87803e-37	TCTEX1D1	TCTEX1D1	13
MIER1	OK	negbinomial.size	1.76044e-07	1.96797e-07	MIER1	MIER1	164
SERBP1	OK	negbinomial.size	1.93905e-83	6.39322e-83	SERBP1	SERBP1	3519
GADD45A	OK	negbinomial.size	4.72631e-51	1.11188e-50	GADD45A	GADD45A	580
GNG12	OK	negbinomial.size	1.37349e-144	7.14867e-144	GNG12	GNG12	16
WLS	OK	negbinomial.size	5.55832e-251	4.94917e-250	WLS	WLS	65
SRSF11	OK	negbinomial.size	2.0553e-29	3.58099e-29	SRSF11	SRSF11	1344
ZRANB2	OK	negbinomial.size	1.33218e-66	3.73499e-66	ZRANB2	ZRANB2	159
TYW3	OK	negbinomial.size	1.57884e-14	2.08898e-14	TYW3	TYW3	17
ACADM	OK	negbinomial.size	3.59258e-18	5.10038e-18	ACADM	ACADM	13
RABGGTB	OK	negbinomial.size	1.67857e-13	2.16028e-13	RABGGTB	RABGGTB	17
USP33	OK	negbinomial.size	9.85223e-10	1.15911e-09	USP33	USP33	19
MIGA1	OK	negbinomial.size	1.89401e-07	2.11535e-07	MIGA1	MIGA1	10
NEXN	OK	negbinomial.size	1.0528e-110	4.35479e-110	NEXN	NEXN	41
FUBP1	OK	negbinomial.size	2.28662e-09	2.66562e-09	FUBP1	FUBP1	59
DNAJB4	OK	negbinomial.size	5.67122e-74	1.69804e-73	DNAJB4	DNAJB4	377
AC103591.3	OK	negbinomial.size	3.96957e-07	4.40376e-07	AC103591.3	AC103591.3	75
IFI44L	OK	negbinomial.size	0	0	IFI44L	IFI44L	977
IFI44	OK	negbinomial.size	4.9701e-170	3.02954e-169	IFI44	IFI44	326
PRKACB	OK	negbinomial.size	8.44993e-175	5.28207e-174	PRKACB	PRKACB	131
RPF1	OK	negbinomial.size	5.23903e-05	5.54401e-05	RPF1	RPF1	11
GNG5	OK	negbinomial.size	3.15702e-25	5.11097e-25	GNG5	GNG5	101
CTBS	OK	negbinomial.size	7.45268e-14	9.67474e-14	CTBS	CTBS	18
C1orf52	OK	negbinomial.size	0.00144553	0.00148704	C1orf52	C1orf52	17
BCL10	OK	negbinomial.size	2.7442e-06	2.98067e-06	BCL10	BCL10	90
CCN1	OK	negbinomial.size	9.91163e-198	6.93927e-197	CCN1	CCN1	77
ODF2L	OK	negbinomial.size	9.13538e-28	1.54852e-27	ODF2L	ODF2L	24
SH3GLB1	OK	negbinomial.size	1.723e-36	3.31401e-36	SH3GLB1	SH3GLB1	1547
SELENOF	OK	negbinomial.size	6.23451e-14	8.11055e-14	SELENOF	SELENOF	536
LMO4	OK	negbinomial.size	3.01366e-27	5.06077e-27	LMO4	LMO4	828
PKN2	OK	negbinomial.size	2.33438e-21	3.50414e-21	PKN2	PKN2	76
GTF2B	OK	negbinomial.size	1.30854e-38	2.60857e-38	GTF2B	GTF2B	145
GBP3	OK	negbinomial.size	3.82891e-64	1.04341e-63	GBP3	GBP3	20
GBP1	OK	negbinomial.size	0	0	GBP1	GBP1	780
GBP2	OK	negbinomial.size	3.08702e-236	2.54866e-235	GBP2	GBP2	1153
GBP4	OK	negbinomial.size	0	0	GBP4	GBP4	203
GBP5	OK	negbinomial.size	0	0	GBP5	GBP5	180
LRRC8C	OK	negbinomial.size	0.0235279	0.0237763	LRRC8C	LRRC8C	15
ZNF326	OK	negbinomial.size	9.48852e-07	1.04375e-06	ZNF326	ZNF326	62
ZNF644	OK	negbinomial.size	1.05933e-17	1.49046e-17	ZNF644	ZNF644	151
TGFBR3	OK	negbinomial.size	3.3622e-248	2.95507e-247	TGFBR3	TGFBR3	75
RPAP2	OK	negbinomial.size	1.96228e-14	2.5896e-14	RPAP2	RPAP2	10
EVI5	OK	negbinomial.size	6.83967e-11	8.28387e-11	EVI5	EVI5	34
RPL5	OK	negbinomial.size	2.35107e-145	1.23628e-144	RPL5	RPL5	12422
MTF2	OK	negbinomial.size	3.94937e-05	4.19086e-05	MTF2	MTF2	30
TMED5	OK	negbinomial.size	1.07904e-40	2.21744e-40	TMED5	TMED5	494
CCDC18	OK	negbinomial.size	1.22987e-13	1.58648e-13	CCDC18	CCDC18	14
CCDC18-AS1	OK	negbinomial.size	3.93281e-34	7.35196e-34	CCDC18-AS1	CCDC18-AS1	10
DR1	OK	negbinomial.size	0.0480241	0.0483398	DR1	DR1	56
DNTTIP2	OK	negbinomial.size	2.66703e-19	3.86338e-19	DNTTIP2	DNTTIP2	402
GCLM	OK	negbinomial.size	3.26821e-17	4.55645e-17	GCLM	GCLM	48
ARHGAP29	OK	negbinomial.size	2.79879e-65	7.73361e-65	ARHGAP29	ARHGAP29	22
F3	OK	negbinomial.size	8.54039e-21	1.26956e-20	F3	F3	19
CNN3	OK	negbinomial.size	3.4911e-87	1.18682e-86	CNN3	CNN3	19
DPYD	OK	negbinomial.size	2.27665e-42	4.80756e-42	DPYD	DPYD	313
RTCA	OK	negbinomial.size	2.62049e-06	2.84782e-06	RTCA	RTCA	20
VCAM1	OK	negbinomial.size	1.01258e-92	3.60854e-92	VCAM1	VCAM1	29
SLC30A7	OK	negbinomial.size	2.21831e-10	2.64797e-10	SLC30A7	SLC30A7	18
RNPC3	OK	negbinomial.size	1.75299e-18	2.50031e-18	RNPC3	RNPC3	14
VAV3	OK	negbinomial.size	2.08483e-48	4.75668e-48	VAV3	VAV3	60
SLC25A24	OK	negbinomial.size	1.70979e-39	3.45227e-39	SLC25A24	SLC25A24	197
FAM102B	OK	negbinomial.size	1.16691e-06	1.28086e-06	FAM102B	FAM102B	14
PRPF38B	OK	negbinomial.size	2.58848e-46	5.7453e-46	PRPF38B	PRPF38B	1016
STXBP3	OK	negbinomial.size	0.262186	0.262658	STXBP3	STXBP3	42
TAF13	OK	negbinomial.size	1.31151e-20	1.94254e-20	TAF13	TAF13	24
TMEM167B	OK	negbinomial.size	1.73819e-08	1.98363e-08	TMEM167B	TMEM167B	43
SARS	OK	negbinomial.size	2.26392e-06	2.46512e-06	SARS	SARS	98
SORT1	OK	negbinomial.size	8.20484e-18	1.15706e-17	SORT1	SORT1	58
PSMA5	OK	negbinomial.size	3.67898e-61	9.75224e-61	PSMA5	PSMA5	406
GNAI3	OK	negbinomial.size	8.6302e-30	1.51053e-29	GNAI3	GNAI3	766
AMPD2	OK	negbinomial.size	5.0174e-82	1.62627e-81	AMPD2	AMPD2	29
GSTM3	OK	negbinomial.size	1.62445e-78	5.07465e-78	GSTM3	GSTM3	26
CSF1	OK	negbinomial.size	1.23577e-65	3.43015e-65	CSF1	CSF1	49
AHCYL1	OK	negbinomial.size	3.15855e-12	3.95206e-12	AHCYL1	AHCYL1	347
LAMTOR5	OK	negbinomial.size	4.14994e-08	4.69831e-08	LAMTOR5	LAMTOR5	670
CD53	OK	negbinomial.size	3.06321e-166	1.82364e-165	CD53	CD53	4794
LRIF1	OK	negbinomial.size	1.22175e-27	2.06639e-27	LRIF1	LRIF1	183
DRAM2	OK	negbinomial.size	2.81431e-72	8.27675e-72	DRAM2	DRAM2	198
CEPT1	OK	negbinomial.size	1.23921e-37	2.43862e-37	CEPT1	CEPT1	51
DENND2D	OK	negbinomial.size	5.0702e-56	1.26621e-55	DENND2D	DENND2D	19
ATP5PB	OK	negbinomial.size	3.4049e-32	6.17478e-32	ATP5PB	ATP5PB	1075
C1orf162	OK	negbinomial.size	0	0	C1orf162	C1orf162	7398
TMIGD3	OK	negbinomial.size	5.59783e-189	3.72743e-188	TMIGD3	TMIGD3	994
ADORA3	OK	negbinomial.size	1.17598e-225	9.25974e-225	ADORA3	ADORA3	91
RAP1A	OK	negbinomial.size	2.40554e-30	4.25168e-30	RAP1A	RAP1A	1063
CTTNBP2NL	OK	negbinomial.size	1.15116e-92	4.09764e-92	CTTNBP2NL	CTTNBP2NL	74
CAPZA1	OK	negbinomial.size	9.43018e-69	2.70203e-68	CAPZA1	CAPZA1	2417
RHOC	OK	negbinomial.size	3.16527e-165	1.87348e-164	RHOC	RHOC	735
SLC16A1	OK	negbinomial.size	9.43705e-27	1.56755e-26	SLC16A1	SLC16A1	26
SLC16A1-AS1	OK	negbinomial.size	1.96858e-17	2.75206e-17	SLC16A1-AS1	SLC16A1-AS1	25
RSBN1	OK	negbinomial.size	2.77883e-14	3.65067e-14	RSBN1	RSBN1	28
PTPN22	OK	negbinomial.size	1.78868e-53	4.3293e-53	PTPN22	PTPN22	22
HIPK1	OK	negbinomial.size	1.74447e-08	1.99006e-08	HIPK1	HIPK1	108
OLFML3	OK	negbinomial.size	1.63575e-179	1.04381e-178	OLFML3	OLFML3	42
TRIM33	OK	negbinomial.size	0.010861	0.0110138	TRIM33	TRIM33	29
BCAS2	OK	negbinomial.size	6.43688e-05	6.77998e-05	BCAS2	BCAS2	128
NRAS	OK	negbinomial.size	1.10791e-25	1.81037e-25	NRAS	NRAS	21
CSDE1	OK	negbinomial.size	5.75398e-20	8.43073e-20	CSDE1	CSDE1	3099
CASQ2	OK	negbinomial.size	1.81654e-35	3.45166e-35	CASQ2	CASQ2	13
ATP1A1	OK	negbinomial.size	5.12403e-139	2.57928e-138	ATP1A1	ATP1A1	3056
CD58	OK	negbinomial.size	1.32429e-36	2.55034e-36	CD58	CD58	81
CD2	OK	negbinomial.size	5.35961e-145	2.80384e-144	CD2	CD2	52
TTF2	OK	negbinomial.size	1.55431e-31	2.79885e-31	TTF2	TTF2	12
MAN1A2	OK	negbinomial.size	5.21417e-20	7.65079e-20	MAN1A2	MAN1A2	66
TENT5C	OK	negbinomial.size	2.31784e-36	4.45112e-36	TENT5C	TENT5C	12
PHGDH	OK	negbinomial.size	1.69443e-137	8.47351e-137	PHGDH	PHGDH	17
NOTCH2	OK	negbinomial.size	3.75206e-23	5.84566e-23	NOTCH2	NOTCH2	109
SEC22B	OK	negbinomial.size	1.647e-19	2.39599e-19	SEC22B	SEC22B	62
RF00003	OK	negbinomial.size	6.49611e-14	8.44729e-14	RF00003	RF00003	70
RNVU1-19	OK	negbinomial.size	2.20465e-16	3.02005e-16	RNVU1-19	RNVU1-19	11
FCGR1B	OK	negbinomial.size	1.49764e-64	4.09762e-64	FCGR1B	FCGR1B	43
SRGAP2C	OK	negbinomial.size	3.75595e-55	9.2666e-55	SRGAP2C	SRGAP2C	41
SRGAP2B	OK	negbinomial.size	6.4906e-60	1.69631e-59	SRGAP2B	SRGAP2B	61
AC245014.3	OK	negbinomial.size	2.18959e-09	2.55348e-09	AC245014.3	AC245014.3	17
RNF115	OK	negbinomial.size	1.47293e-17	2.0657e-17	RNF115	RNF115	33
RBM8A	OK	negbinomial.size	4.49464e-28	7.68037e-28	RBM8A	RBM8A	852
POLR3GL	OK	negbinomial.size	3.27269e-27	5.48973e-27	POLR3GL	POLR3GL	32
TXNIP	OK	negbinomial.size	0	0	TXNIP	TXNIP	11589
RF00003.9	OK	negbinomial.size	0.00205889	0.00211163	RF00003.9	RF00003.9	15
PDE4DIP	OK	negbinomial.size	4.31492e-40	8.79055e-40	PDE4DIP	PDE4DIP	99
FCGR1A	OK	negbinomial.size	4.36663e-251	3.89374e-250	FCGR1A	FCGR1A	951
HIST2H2BE	OK	negbinomial.size	3.101e-11	3.78119e-11	HIST2H2BE	HIST2H2BE	10
HIST2H2AC	OK	negbinomial.size	1.81911e-37	3.56718e-37	HIST2H2AC	HIST2H2AC	26
PLEKHO1	OK	negbinomial.size	1.83322e-237	1.51761e-236	PLEKHO1	PLEKHO1	2626
ANP32E	OK	negbinomial.size	4.3999e-166	2.6118e-165	ANP32E	ANP32E	254
APH1A	OK	negbinomial.size	6.72566e-41	1.38772e-40	APH1A	APH1A	165
C1orf54	OK	negbinomial.size	8.77089e-221	6.75006e-220	C1orf54	C1orf54	189
MRPS21	OK	negbinomial.size	1.24093e-29	2.16827e-29	MRPS21	MRPS21	608
ECM1	OK	negbinomial.size	2.58551e-136	1.28146e-135	ECM1	ECM1	106
ADAMTSL4	OK	negbinomial.size	9.63205e-25	1.54547e-24	ADAMTSL4	ADAMTSL4	40
MCL1	OK	negbinomial.size	0	0	MCL1	MCL1	8268
ENSA	OK	negbinomial.size	1.70507e-13	2.19299e-13	ENSA	ENSA	546
CTSS	OK	negbinomial.size	0	0	CTSS	CTSS	12267
CTSK	OK	negbinomial.size	1.52806e-82	4.99514e-82	CTSK	CTSK	21
CERS2	OK	negbinomial.size	3.80468e-29	6.59708e-29	CERS2	CERS2	74
CDC42SE1	OK	negbinomial.size	4.65249e-57	1.17676e-56	CDC42SE1	CDC42SE1	246
TNFAIP8L2	OK	negbinomial.size	2.66448e-19	3.8606e-19	TNFAIP8L2	TNFAIP8L2	21
SCNM1	OK	negbinomial.size	1.57868e-09	1.84701e-09	SCNM1	SCNM1	19
PSMD4	OK	negbinomial.size	6.42342e-20	9.40485e-20	PSMD4	PSMD4	341
PSMB4	OK	negbinomial.size	5.5998e-21	8.35265e-21	PSMB4	PSMB4	582
POGZ	OK	negbinomial.size	7.47062e-12	9.26605e-12	POGZ	POGZ	56
SNX27	OK	negbinomial.size	1.21433e-13	1.56743e-13	SNX27	SNX27	100
S100A10	OK	negbinomial.size	0	0	S100A10	S100A10	15180
S100A11	OK	negbinomial.size	0	0	S100A11	S100A11	18997
TCHH	OK	negbinomial.size	3.03916e-71	8.8488e-71	TCHH	TCHH	80
S100A9	OK	negbinomial.size	0	0	S100A9	S100A9	12695
S100A12	OK	negbinomial.size	0	0	S100A12	S100A12	2137
S100A8	OK	negbinomial.size	0	0	S100A8	S100A8	7878
S100A6	OK	negbinomial.size	0	0	S100A6	S100A6	18266
S100A4	OK	negbinomial.size	0	0	S100A4	S100A4	16514
S100A16	OK	negbinomial.size	8.51103e-72	2.4899e-71	S100A16	S100A16	25
S100A13	OK	negbinomial.size	5.37255e-216	4.03336e-215	S100A13	S100A13	90
CHTOP	OK	negbinomial.size	0.000281818	0.000293559	CHTOP	CHTOP	27
ILF2	OK	negbinomial.size	8.40664e-18	1.18498e-17	ILF2	ILF2	150
SLC27A3	OK	negbinomial.size	4.24451e-58	1.08567e-57	SLC27A3	SLC27A3	29
DENND4B	OK	negbinomial.size	3.72348e-09	4.32008e-09	DENND4B	DENND4B	31
JTB	OK	negbinomial.size	5.92617e-09	6.84459e-09	JTB	JTB	505
RAB13	OK	negbinomial.size	2.81479e-78	8.77526e-78	RAB13	RAB13	562
RPS27	OK	negbinomial.size	0	0	RPS27	RPS27	16650
TPM3	OK	negbinomial.size	1.30378e-164	7.6724e-164	TPM3	TPM3	12363
C1orf43	OK	negbinomial.size	7.93945e-17	1.09815e-16	C1orf43	C1orf43	324
UBAP2L	OK	negbinomial.size	5.73003e-08	6.4633e-08	UBAP2L	UBAP2L	45
HAX1	OK	negbinomial.size	6.6332e-15	8.851e-15	HAX1	HAX1	51
IL6R-AS1	OK	negbinomial.size	0.000908115	0.00093734	IL6R-AS1	IL6R-AS1	14
IL6R	OK	negbinomial.size	3.15735e-83	1.03766e-82	IL6R	IL6R	292
UBE2Q1	OK	negbinomial.size	0.0175586	0.0177675	UBE2Q1	UBE2Q1	25
ADAR	OK	negbinomial.size	7.90053e-73	2.33697e-72	ADAR	ADAR	358
PMVK	OK	negbinomial.size	3.43032e-21	5.13542e-21	PMVK	PMVK	42
SHC1	OK	negbinomial.size	9.23868e-18	1.30106e-17	SHC1	SHC1	13
CKS1B	OK	negbinomial.size	7.14471e-244	6.12147e-243	CKS1B	CKS1B	103
ADAM15	OK	negbinomial.size	2.57032e-24	4.0962e-24	ADAM15	ADAM15	67
SLC50A1	OK	negbinomial.size	8.69798e-14	1.12675e-13	SLC50A1	SLC50A1	11
DPM3	OK	negbinomial.size	4.36703e-10	5.17756e-10	DPM3	DPM3	43
KRTCAP2	OK	negbinomial.size	1.60166e-14	2.11871e-14	KRTCAP2	KRTCAP2	213
FDPS	OK	negbinomial.size	1.22647e-37	2.41432e-37	FDPS	FDPS	73
ASH1L	OK	negbinomial.size	2.45037e-09	2.85271e-09	ASH1L	ASH1L	290
DAP3	OK	negbinomial.size	4.94416e-19	7.11986e-19	DAP3	DAP3	52
GON4L	OK	negbinomial.size	1.54799e-07	1.733e-07	GON4L	GON4L	16
SYT11	OK	negbinomial.size	1.07357e-74	3.23816e-74	SYT11	SYT11	40
RIT1	OK	negbinomial.size	7.6009e-35	1.4358e-34	RIT1	RIT1	129
KHDC4	OK	negbinomial.size	1.97351e-06	2.15311e-06	KHDC4	KHDC4	14
ARHGEF2	OK	negbinomial.size	4.67499e-14	6.10509e-14	ARHGEF2	ARHGEF2	120
SSR2	OK	negbinomial.size	9.46037e-16	1.28161e-15	SSR2	SSR2	1333
LAMTOR2	OK	negbinomial.size	1.04447e-25	1.70852e-25	LAMTOR2	LAMTOR2	1275
LMNA	OK	negbinomial.size	0	0	LMNA	LMNA	5794
SEMA4A	OK	negbinomial.size	3.05502e-24	4.86105e-24	SEMA4A	SEMA4A	238
SLC25A44	OK	negbinomial.size	3.84702e-19	5.55167e-19	SLC25A44	SLC25A44	73
PMF1	OK	negbinomial.size	0.000122074	0.000128074	PMF1	PMF1	11
GLMP	OK	negbinomial.size	3.06943e-90	1.07386e-89	GLMP	GLMP	84
CCT3	OK	negbinomial.size	1.25113e-59	3.26007e-59	CCT3	CCT3	723
MEF2D	OK	negbinomial.size	9.62658e-14	1.24598e-13	MEF2D	MEF2D	42
NAXE	OK	negbinomial.size	3.90193e-12	4.86629e-12	NAXE	NAXE	13
GPATCH4	OK	negbinomial.size	3.14763e-56	7.88002e-56	GPATCH4	GPATCH4	93
NES	OK	negbinomial.size	1.90227e-97	7.02428e-97	NES	NES	47
ISG20L2	OK	negbinomial.size	9.45833e-12	1.17054e-11	ISG20L2	ISG20L2	54
MRPL24	OK	negbinomial.size	1.34321e-57	3.42001e-57	MRPL24	MRPL24	49
HDGF	OK	negbinomial.size	1.2612e-41	2.62435e-41	HDGF	HDGF	237
ETV3	OK	negbinomial.size	7.45661e-28	1.26711e-27	ETV3	ETV3	64
CD1D	OK	negbinomial.size	4.69558e-120	2.09658e-119	CD1D	CD1D	17
AL138899.1	OK	negbinomial.size	7.7758e-72	2.2759e-71	AL138899.1	AL138899.1	19
CD1C	OK	negbinomial.size	0	0	CD1C	CD1C	121
CD1E	OK	negbinomial.size	7.49132e-114	3.17371e-113	CD1E	CD1E	27
MNDA	OK	negbinomial.size	0	0	MNDA	MNDA	4066
IFI16	OK	negbinomial.size	2.78948e-202	1.98241e-201	IFI16	IFI16	4070
CADM3	OK	negbinomial.size	1.18861e-65	3.30223e-65	CADM3	CADM3	10
ACKR1	OK	negbinomial.size	1.17779e-84	3.92339e-84	ACKR1	ACKR1	31
FCER1A	OK	negbinomial.size	0	0	FCER1A	FCER1A	101
DUSP23	OK	negbinomial.size	9.76228e-37	1.88834e-36	DUSP23	DUSP23	196
SLAMF8	OK	negbinomial.size	1.00915e-241	8.52696e-241	SLAMF8	SLAMF8	208
TAGLN2	OK	negbinomial.size	8.12848e-135	3.99319e-134	TAGLN2	TAGLN2	7348
SLAMF9	OK	negbinomial.size	4.94609e-69	1.42119e-68	SLAMF9	SLAMF9	39
PIGM	OK	negbinomial.size	9.40945e-16	1.27499e-15	PIGM	PIGM	12
PEA15	OK	negbinomial.size	3.00472e-116	1.30268e-115	PEA15	PEA15	754
COPA	OK	negbinomial.size	3.60592e-07	4.00323e-07	COPA	COPA	666
NCSTN	OK	negbinomial.size	2.46843e-16	3.3755e-16	NCSTN	NCSTN	17
CD84	OK	negbinomial.size	2.23333e-281	2.26139e-280	CD84	CD84	1993
CD48	OK	negbinomial.size	0	0	CD48	CD48	461
SLAMF7	OK	negbinomial.size	2.70359e-256	2.51323e-255	SLAMF7	SLAMF7	153
TSTD1	OK	negbinomial.size	1.18213e-38	2.36078e-38	TSTD1	TSTD1	22
ARHGAP30	OK	negbinomial.size	1.76791e-50	4.14156e-50	ARHGAP30	ARHGAP30	536
PFDN2	OK	negbinomial.size	1.88111e-60	4.94155e-60	PFDN2	PFDN2	610
UFC1	OK	negbinomial.size	1.53755e-10	1.84651e-10	UFC1	UFC1	327
ADAMTS4	OK	negbinomial.size	6.3374e-22	9.62632e-22	ADAMTS4	ADAMTS4	16
NDUFS2	OK	negbinomial.size	6.02897e-19	8.66576e-19	NDUFS2	NDUFS2	146
FCER1G	OK	negbinomial.size	0	0	FCER1G	FCER1G	16381
TOMM40L	OK	negbinomial.size	6.4826e-48	1.46865e-47	TOMM40L	TOMM40L	15
SDHC	OK	negbinomial.size	0.0286667	0.0289264	SDHC	SDHC	71
FCGR2A	OK	negbinomial.size	0	0	FCGR2A	FCGR2A	5799
HSPA6	OK	negbinomial.size	3.50586e-264	3.31946e-263	HSPA6	HSPA6	1274
FCGR3A	OK	negbinomial.size	0	0	FCGR3A	FCGR3A	7574
FCGR2C	OK	negbinomial.size	1.51074e-151	8.22651e-151	FCGR2C	FCGR2C	54
FCGR3B	OK	negbinomial.size	2.34039e-235	1.92188e-234	FCGR3B	FCGR3B	10
FCGR2B	OK	negbinomial.size	0	0	FCGR2B	FCGR2B	696
ATF6	OK	negbinomial.size	4.78908e-33	8.80225e-33	ATF6	ATF6	186
OLFML2B	OK	negbinomial.size	1.34881e-246	1.17203e-245	OLFML2B	OLFML2B	308
UHMK1	OK	negbinomial.size	4.70854e-32	8.52631e-32	UHMK1	UHMK1	119
UAP1	OK	negbinomial.size	4.26966e-48	9.70176e-48	UAP1	UAP1	60
DDR2	OK	negbinomial.size	2.73148e-276	2.7297e-275	DDR2	DDR2	75
RGS5	OK	negbinomial.size	0	0	RGS5	RGS5	109
NUF2	OK	negbinomial.size	4.12339e-142	2.1138e-141	NUF2	NUF2	14
PBX1	OK	negbinomial.size	1.02001e-161	5.89491e-161	PBX1	PBX1	23
MGST3	OK	negbinomial.size	5.98777e-191	4.01764e-190	MGST3	MGST3	1962
ALDH9A1	OK	negbinomial.size	1.59111e-39	3.21687e-39	ALDH9A1	ALDH9A1	35
TMCO1	OK	negbinomial.size	8.09928e-32	1.46317e-31	TMCO1	TMCO1	410
POU2F1	OK	negbinomial.size	2.18119e-23	3.41477e-23	POU2F1	POU2F1	26
CD247	OK	negbinomial.size	1.24632e-70	3.61332e-70	CD247	CD247	12
CREG1	OK	negbinomial.size	0	0	CREG1	CREG1	2990
RCSD1	OK	negbinomial.size	8.9797e-85	2.99944e-84	RCSD1	RCSD1	247
MPZL1	OK	negbinomial.size	3.4306e-41	7.10234e-41	MPZL1	MPZL1	21
MPC2	OK	negbinomial.size	5.54532e-171	3.39367e-170	MPC2	MPC2	218
DCAF6	OK	negbinomial.size	5.73099e-07	6.34063e-07	DCAF6	DCAF6	11
TIPRL	OK	negbinomial.size	5.33693e-05	5.64372e-05	TIPRL	TIPRL	37
SFT2D2	OK	negbinomial.size	3.9632e-41	8.19391e-41	SFT2D2	SFT2D2	176
XCL2	OK	negbinomial.size	2.98677e-84	9.92241e-84	XCL2	XCL2	14
DPT	OK	negbinomial.size	2.71321e-81	8.72499e-81	DPT	DPT	14
ATP1B1	OK	negbinomial.size	4.68858e-267	4.50898e-266	ATP1B1	ATP1B1	372
SLC19A2	OK	negbinomial.size	6.26162e-11	7.59128e-11	SLC19A2	SLC19A2	22
SELL	OK	negbinomial.size	0	0	SELL	SELL	136
PRRX1	OK	negbinomial.size	0	0	PRRX1	PRRX1	206
FMO2	OK	negbinomial.size	2.5478e-184	1.65864e-183	FMO2	FMO2	63
PRRC2C	OK	negbinomial.size	6.11929e-15	8.16884e-15	PRRC2C	PRRC2C	4403
MYOC	OK	negbinomial.size	7.25898e-174	4.50999e-173	MYOC	MYOC	28
SUCO	OK	negbinomial.size	0.0472372	0.0475555	SUCO	SUCO	17
PRDX6	OK	negbinomial.size	8.80371e-19	1.26215e-18	PRDX6	PRDX6	830
CENPL	OK	negbinomial.size	3.60695e-50	8.4144e-50	CENPL	CENPL	12
GAS5	OK	negbinomial.size	2.64637e-71	7.71616e-71	GAS5	GAS5	1129
RC3H1	OK	negbinomial.size	7.27363e-09	8.38823e-09	RC3H1	RC3H1	42
RABGAP1L	OK	negbinomial.size	4.74254e-59	1.22845e-58	RABGAP1L	RABGAP1L	67
CACYBP	OK	negbinomial.size	4.20326e-51	9.89972e-51	CACYBP	CACYBP	633
KIAA0040	OK	negbinomial.size	1.23815e-19	1.80593e-19	KIAA0040	KIAA0040	14
AL365357.1	OK	negbinomial.size	4.61053e-30	8.10216e-30	AL365357.1	AL365357.1	17
TOR3A	OK	negbinomial.size	1.38088e-17	1.93753e-17	TOR3A	TOR3A	25
ABL2	OK	negbinomial.size	6.83917e-192	4.63973e-191	ABL2	ABL2	962
SOAT1	OK	negbinomial.size	5.60188e-18	7.92726e-18	SOAT1	SOAT1	235
TOR1AIP2	OK	negbinomial.size	0.00113657	0.00117157	TOR1AIP2	TOR1AIP2	121
TOR1AIP1	OK	negbinomial.size	3.85497e-12	4.8087e-12	TOR1AIP1	TOR1AIP1	27
CEP350	OK	negbinomial.size	6.26271e-45	1.36824e-44	CEP350	CEP350	650
QSOX1	OK	negbinomial.size	5.69669e-177	3.60144e-176	QSOX1	QSOX1	190
STX6	OK	negbinomial.size	2.08052e-40	4.25267e-40	STX6	STX6	78
MR1	OK	negbinomial.size	8.74771e-28	1.48362e-27	MR1	MR1	44
IER5	OK	negbinomial.size	7.42653e-184	4.81937e-183	IER5	IER5	2819
GLUL	OK	negbinomial.size	0	0	GLUL	GLUL	12100
RGS16	OK	negbinomial.size	8.81508e-64	2.39792e-63	RGS16	RGS16	68
NPL	OK	negbinomial.size	5.31211e-290	5.50626e-289	NPL	NPL	873
DHX9	OK	negbinomial.size	7.40269e-14	9.61189e-14	DHX9	DHX9	152
LAMC1	OK	negbinomial.size	2.57604e-130	1.23096e-129	LAMC1	LAMC1	42
NCF2	OK	negbinomial.size	0	0	NCF2	NCF2	1481
ARPC5	OK	negbinomial.size	4.10888e-97	1.51633e-96	ARPC5	ARPC5	9997
RGL1	OK	negbinomial.size	1.01852e-297	1.0985e-296	RGL1	RGL1	674
C1orf21	OK	negbinomial.size	1.53925e-80	4.91117e-80	C1orf21	C1orf21	12
EDEM3	OK	negbinomial.size	2.85356e-23	4.45601e-23	EDEM3	EDEM3	105
FAM129A	OK	negbinomial.size	2.07542e-239	1.7298e-238	FAM129A	FAM129A	553
AL356273.3	OK	negbinomial.size	9.24681e-67	2.59963e-66	AL356273.3	AL356273.3	65
IVNS1ABP	OK	negbinomial.size	9.52405e-121	4.26805e-120	IVNS1ABP	IVNS1ABP	556
PRG4	OK	negbinomial.size	9.3325e-110	3.82926e-109	PRG4	PRG4	16
TPR	OK	negbinomial.size	4.16607e-44	8.98322e-44	TPR	TPR	687
ODR4	OK	negbinomial.size	8.05053e-06	8.6522e-06	ODR4	ODR4	11
PTGS2	OK	negbinomial.size	0	0	PTGS2	PTGS2	690
RGS18	OK	negbinomial.size	3.27887e-144	1.70223e-143	RGS18	RGS18	108
AL136987.1	OK	negbinomial.size	2.51347e-41	5.20891e-41	AL136987.1	AL136987.1	21
RGS1	OK	negbinomial.size	0	0	RGS1	RGS1	3620
RGS13	OK	negbinomial.size	1.47117e-35	2.80062e-35	RGS13	RGS13	17
RGS2	OK	negbinomial.size	0	0	RGS2	RGS2	5314
UCHL5	OK	negbinomial.size	5.61612e-09	6.48894e-09	UCHL5	UCHL5	13
RO60	OK	negbinomial.size	9.72585e-10	1.14468e-09	RO60	RO60	99
GLRX2	OK	negbinomial.size	6.55877e-10	7.75357e-10	GLRX2	GLRX2	14
CDC73	OK	negbinomial.size	0.000726662	0.000751567	CDC73	CDC73	42
CFH	OK	negbinomial.size	0	0	CFH	CFH	134
ASPM	OK	negbinomial.size	0	0	ASPM	ASPM	134
DENND1B	OK	negbinomial.size	6.9523e-21	1.03499e-20	DENND1B	DENND1B	50
PTPRC	OK	negbinomial.size	0	0	PTPRC	PTPRC	6646
MIR181A1HG	OK	negbinomial.size	1.86317e-49	4.32013e-49	MIR181A1HG	MIR181A1HG	108
ZNF281	OK	negbinomial.size	1.36041e-269	1.32494e-268	ZNF281	ZNF281	271
KIF14	OK	negbinomial.size	2.89042e-74	8.6755e-74	KIF14	KIF14	18
CAMSAP2	OK	negbinomial.size	5.05648e-20	7.42118e-20	CAMSAP2	CAMSAP2	44
LAD1	OK	negbinomial.size	5.00715e-68	1.42536e-67	LAD1	LAD1	15
PHLDA3	OK	negbinomial.size	1.06149e-48	2.43183e-48	PHLDA3	PHLDA3	11
CSRP1	OK	negbinomial.size	3.19848e-41	6.62404e-41	CSRP1	CSRP1	137
NAV1	OK	negbinomial.size	3.26055e-76	1.00021e-75	NAV1	NAV1	88
IPO9	OK	negbinomial.size	2.24964e-13	2.88347e-13	IPO9	IPO9	14
LMOD1	OK	negbinomial.size	4.985e-141	2.53639e-140	LMOD1	LMOD1	48
TIMM17A	OK	negbinomial.size	2.08224e-20	3.07147e-20	TIMM17A	TIMM17A	59
RNPEP	OK	negbinomial.size	1.40443e-19	2.04652e-19	RNPEP	RNPEP	90
ARL8A	OK	negbinomial.size	5.86075e-26	9.62803e-26	ARL8A	ARL8A	170
PTPN7	OK	negbinomial.size	1.93613e-62	5.19068e-62	PTPN7	PTPN7	105
UBE2T	OK	negbinomial.size	8.70569e-114	3.68563e-113	UBE2T	UBE2T	13
PPP1R12B	OK	negbinomial.size	2.14674e-43	4.5822e-43	PPP1R12B	PPP1R12B	20
KDM5B	OK	negbinomial.size	7.96279e-20	1.16448e-19	KDM5B	KDM5B	85
ADIPOR1	OK	negbinomial.size	7.08024e-52	1.68245e-51	ADIPOR1	ADIPOR1	188
CYB5R1	OK	negbinomial.size	5.3321e-21	7.95917e-21	CYB5R1	CYB5R1	14
TMEM183A	OK	negbinomial.size	0.0151801	0.0153733	TMEM183A	TMEM183A	21
BTG2	OK	negbinomial.size	7.24581e-230	5.83283e-229	BTG2	BTG2	1329
PRELP	OK	negbinomial.size	0	0	PRELP	PRELP	180
ATP2B4	OK	negbinomial.size	7.00375e-42	1.46383e-41	ATP2B4	ATP2B4	57
SNRPE	OK	negbinomial.size	1.09429e-46	2.44034e-46	SNRPE	SNRPE	332
PPP1R15B	OK	negbinomial.size	1.02012e-106	4.08714e-106	PPP1R15B	PPP1R15B	795
MDM4	OK	negbinomial.size	1.53844e-08	1.75863e-08	MDM4	MDM4	213
DSTYK	OK	negbinomial.size	4.29438e-06	4.64303e-06	DSTYK	DSTYK	15
ELK4	OK	negbinomial.size	1.31974e-16	1.81558e-16	ELK4	ELK4	17
NUCKS1	OK	negbinomial.size	0	0	NUCKS1	NUCKS1	3014
RAB29	OK	negbinomial.size	1.34705e-31	2.42777e-31	RAB29	RAB29	55
RAB7B	OK	negbinomial.size	6.08275e-69	1.74615e-68	RAB7B	RAB7B	50
RHEX	OK	negbinomial.size	1.40539e-193	9.60871e-193	RHEX	RHEX	29
SRGAP2	OK	negbinomial.size	1.09938e-48	2.5158e-48	SRGAP2	SRGAP2	197
RASSF5	OK	negbinomial.size	1.2094e-168	7.2921e-168	RASSF5	RASSF5	164
MAPKAPK2	OK	negbinomial.size	2.61101e-57	6.63145e-57	MAPKAPK2	MAPKAPK2	216
IL10	OK	negbinomial.size	8.63553e-274	8.53246e-273	IL10	IL10	748
CD55	OK	negbinomial.size	0	0	CD55	CD55	2097
CR1	OK	negbinomial.size	0	0	CR1	CR1	189
CD46	OK	negbinomial.size	5.76716e-13	7.32828e-13	CD46	CD46	171
MIR29B2CHG	OK	negbinomial.size	1.08969e-16	1.50213e-16	MIR29B2CHG	MIR29B2CHG	31
CD34	OK	negbinomial.size	5.97835e-191	4.01572e-190	CD34	CD34	52
LAMB3	OK	negbinomial.size	4.11151e-83	1.35051e-82	LAMB3	LAMB3	11
G0S2	OK	negbinomial.size	0	0	G0S2	G0S2	3847
TRAF3IP3	OK	negbinomial.size	6.13775e-66	1.70909e-65	TRAF3IP3	TRAF3IP3	21
SLC30A1	OK	negbinomial.size	6.0877e-11	7.38188e-11	SLC30A1	SLC30A1	218
LPGAT1	OK	negbinomial.size	0.00445637	0.00454163	LPGAT1	LPGAT1	39
PPP2R5A	OK	negbinomial.size	2.38878e-12	2.99501e-12	PPP2R5A	PPP2R5A	15
NENF	OK	negbinomial.size	7.67025e-79	2.40225e-78	NENF	NENF	273
ATF3	OK	negbinomial.size	1.81e-265	1.72174e-264	ATF3	ATF3	4542
BATF3	OK	negbinomial.size	1.37777e-74	4.14958e-74	BATF3	BATF3	28
NSL1	OK	negbinomial.size	8.86355e-51	2.08039e-50	NSL1	NSL1	65
TATDN3	OK	negbinomial.size	6.56363e-13	8.32825e-13	TATDN3	TATDN3	12
PROX1	OK	negbinomial.size	2.00661e-106	8.02384e-106	PROX1	PROX1	17
CENPF	OK	negbinomial.size	0	0	CENPF	CENPF	294
RRP15	OK	negbinomial.size	4.99391e-22	7.61201e-22	RRP15	RRP15	14
EPRS	OK	negbinomial.size	2.48096e-49	5.74391e-49	EPRS	EPRS	182
IARS2	OK	negbinomial.size	3.68672e-15	4.94199e-15	IARS2	IARS2	33
RAB3GAP2	OK	negbinomial.size	8.64986e-07	9.52355e-07	RAB3GAP2	RAB3GAP2	16
HLX	OK	negbinomial.size	1.50908e-09	1.76694e-09	HLX	HLX	42
DUSP10	OK	negbinomial.size	1.94508e-20	2.87191e-20	DUSP10	DUSP10	77
MIA3	OK	negbinomial.size	1.54758e-26	2.5609e-26	MIA3	MIA3	80
AIDA	OK	negbinomial.size	3.94783e-46	8.72767e-46	AIDA	AIDA	56
BROX	OK	negbinomial.size	1.26538e-15	1.70893e-15	BROX	BROX	92
AL392172.1	OK	negbinomial.size	1.54427e-108	6.25674e-108	AL392172.1	AL392172.1	40
TLR5	OK	negbinomial.size	7.27555e-67	2.04731e-66	TLR5	TLR5	45
CAPN2	OK	negbinomial.size	9.23776e-82	2.98159e-81	CAPN2	CAPN2	367
TP53BP2	OK	negbinomial.size	2.23302e-36	4.29094e-36	TP53BP2	TP53BP2	69
DEGS1	OK	negbinomial.size	1.7992e-23	2.82034e-23	DEGS1	DEGS1	218
CNIH4	OK	negbinomial.size	1.08865e-41	2.26993e-41	CNIH4	CNIH4	186
WDR26	OK	negbinomial.size	1.18377e-47	2.67495e-47	WDR26	WDR26	378
LBR	OK	negbinomial.size	1.25031e-58	3.22365e-58	LBR	LBR	243
ENAH	OK	negbinomial.size	4.03834e-60	1.05722e-59	ENAH	ENAH	13
SRP9	OK	negbinomial.size	6.04848e-20	8.85799e-20	SRP9	SRP9	305
EPHX1	OK	negbinomial.size	4.15783e-219	3.17592e-218	EPHX1	EPHX1	52
SDE2	OK	negbinomial.size	1.17813e-11	1.45274e-11	SDE2	SDE2	20
H3F3A	OK	negbinomial.size	0	0	H3F3A	H3F3A	14339
ACBD3	OK	negbinomial.size	2.55557e-10	3.04354e-10	ACBD3	ACBD3	87
PARP1	OK	negbinomial.size	1.01515e-144	5.29261e-144	PARP1	PARP1	215
ARF1	OK	negbinomial.size	8.45266e-28	1.43438e-27	ARF1	ARF1	2972
C1orf35	OK	negbinomial.size	3.46326e-13	4.41723e-13	C1orf35	C1orf35	14
MRPL55	OK	negbinomial.size	1.25955e-06	1.38131e-06	MRPL55	MRPL55	24
GUK1	OK	negbinomial.size	9.27428e-40	1.88189e-39	GUK1	GUK1	3046
HIST3H2A	OK	negbinomial.size	2.25249e-32	4.09458e-32	HIST3H2A	HIST3H2A	34
RNF187	OK	negbinomial.size	0.0282099	0.0284702	RNF187	RNF187	25
RHOU	OK	negbinomial.size	1.93861e-47	4.36776e-47	RHOU	RHOU	107
RAB4A	OK	negbinomial.size	5.56057e-07	6.15319e-07	RAB4A	RAB4A	32
CCSAP	OK	negbinomial.size	2.01654e-20	2.97528e-20	CCSAP	CCSAP	21
GALNT2	OK	negbinomial.size	5.96336e-12	7.41306e-12	GALNT2	GALNT2	17
AGT	OK	negbinomial.size	1.45002e-50	3.39946e-50	AGT	AGT	14
C1orf131	OK	negbinomial.size	1.39663e-13	1.80045e-13	C1orf131	C1orf131	14
EGLN1	OK	negbinomial.size	2.00552e-08	2.28445e-08	EGLN1	EGLN1	19
AL445524.1	OK	negbinomial.size	2.89606e-79	9.12149e-79	AL445524.1	AL445524.1	20
TSNAX	OK	negbinomial.size	0.387676	0.387993	TSNAX	TSNAX	55
SIPA1L2	OK	negbinomial.size	3.79705e-18	5.38817e-18	SIPA1L2	SIPA1L2	38
COA6	OK	negbinomial.size	1.17962e-15	1.59417e-15	COA6	COA6	60
IRF2BP2	OK	negbinomial.size	1.21308e-66	3.40263e-66	IRF2BP2	IRF2BP2	2204
TOMM20	OK	negbinomial.size	5.89009e-29	1.01929e-28	TOMM20	TOMM20	1077
ARID4B	OK	negbinomial.size	6.2652e-18	8.85979e-18	ARID4B	ARID4B	627
B3GALNT2	OK	negbinomial.size	4.43606e-12	5.52568e-12	B3GALNT2	B3GALNT2	35
LYST	OK	negbinomial.size	1.50322e-79	4.74677e-79	LYST	LYST	131
NID1	OK	negbinomial.size	2.21624e-255	2.03854e-254	NID1	NID1	99
GPR137B	OK	negbinomial.size	5.92412e-52	1.40991e-51	GPR137B	GPR137B	79
ERO1B	OK	negbinomial.size	3.85995e-67	1.08968e-66	ERO1B	ERO1B	232
LGALS8	OK	negbinomial.size	2.29157e-09	2.67088e-09	LGALS8	LGALS8	101
MTR	OK	negbinomial.size	1.27973e-33	2.3742e-33	MTR	MTR	17
KMO	OK	negbinomial.size	4.1417e-22	6.32247e-22	KMO	KMO	35
OPN3	OK	negbinomial.size	2.44328e-60	6.40733e-60	OPN3	OPN3	92
CHML	OK	negbinomial.size	4.4837e-121	2.01816e-120	CHML	CHML	804
CEP170	OK	negbinomial.size	5.98451e-89	2.06541e-88	CEP170	CEP170	632
SDCCAG8	OK	negbinomial.size	9.9948e-35	1.88394e-34	SDCCAG8	SDCCAG8	201
ADSS	OK	negbinomial.size	6.68124e-34	1.24481e-33	ADSS	ADSS	96
DESI2	OK	negbinomial.size	1.99493e-15	2.68356e-15	DESI2	DESI2	18
COX20	OK	negbinomial.size	1.73396e-64	4.74207e-64	COX20	COX20	393
HNRNPU	OK	negbinomial.size	1.33462e-30	2.36707e-30	HNRNPU	HNRNPU	8743
SCCPDH	OK	negbinomial.size	1.33317e-34	2.50753e-34	SCCPDH	SCCPDH	20
AHCTF1	OK	negbinomial.size	1.87508e-34	3.51815e-34	AHCTF1	AHCTF1	66
NLRP3	OK	negbinomial.size	0	0	NLRP3	NLRP3	1235
ACP1	OK	negbinomial.size	4.32123e-27	7.23274e-27	ACP1	ACP1	90
TMEM18	OK	negbinomial.size	6.65077e-10	7.85931e-10	TMEM18	TMEM18	11
ADI1	OK	negbinomial.size	2.9428e-46	6.51993e-46	ADI1	ADI1	160
RNASEH1	OK	negbinomial.size	3.73032e-09	4.3272e-09	RNASEH1	RNASEH1	16
RPS7	OK	negbinomial.size	3.37177e-140	1.70565e-139	RPS7	RPS7	14326
CMPK2	OK	negbinomial.size	4.46278e-109	1.82017e-108	CMPK2	CMPK2	35
RSAD2	OK	negbinomial.size	0	0	RSAD2	RSAD2	323
ID2	OK	negbinomial.size	1.78701e-190	1.19511e-189	ID2	ID2	5057
KIDINS220	OK	negbinomial.size	1.82211e-14	2.40599e-14	KIDINS220	KIDINS220	144
ITGB1BP1	OK	negbinomial.size	1.98722e-11	2.43914e-11	ITGB1BP1	ITGB1BP1	58
IAH1	OK	negbinomial.size	0.00301519	0.00308468	IAH1	IAH1	53
ADAM17	OK	negbinomial.size	4.71382e-114	2.00534e-113	ADAM17	ADAM17	1388
YWHAQ	OK	negbinomial.size	1.66383e-38	3.31144e-38	YWHAQ	YWHAQ	605
KLF11	OK	negbinomial.size	2.86237e-24	4.55688e-24	KLF11	KLF11	32
RRM2	OK	negbinomial.size	0	0	RRM2	RRM2	123
HPCAL1	OK	negbinomial.size	2.58751e-92	9.17839e-92	HPCAL1	HPCAL1	252
ODC1	OK	negbinomial.size	1.01766e-48	2.33228e-48	ODC1	ODC1	219
PDIA6	OK	negbinomial.size	9.44254e-154	5.22538e-153	PDIA6	PDIA6	3002
PQLC3	OK	negbinomial.size	2.32084e-24	3.70246e-24	PQLC3	PQLC3	18
ROCK2	OK	negbinomial.size	4.05243e-21	6.0638e-21	ROCK2	ROCK2	100
LPIN1	OK	negbinomial.size	8.25857e-24	1.30392e-23	LPIN1	LPIN1	61
DDX1	OK	negbinomial.size	7.33804e-23	1.1369e-22	DDX1	DDX1	54
FAM49A	OK	negbinomial.size	3.98679e-92	1.41255e-91	FAM49A	FAM49A	218
OSR1	OK	negbinomial.size	5.6567e-110	2.3257e-109	OSR1	OSR1	18
LAPTM4A	OK	negbinomial.size	7.96135e-42	1.66228e-41	LAPTM4A	LAPTM4A	2036
PUM2	OK	negbinomial.size	1.66115e-06	1.81523e-06	PUM2	PUM2	31
RHOB	OK	negbinomial.size	5.07444e-291	5.27777e-290	RHOB	RHOB	5148
UBXN2A	OK	negbinomial.size	0.00358395	0.003658	UBXN2A	UBXN2A	20
SF3B6	OK	negbinomial.size	2.60926e-10	3.10617e-10	SF3B6	SF3B6	601
TP53I3	OK	negbinomial.size	4.43374e-09	5.13345e-09	TP53I3	TP53I3	26
ITSN2	OK	negbinomial.size	5.87344e-22	8.93044e-22	ITSN2	ITSN2	480
NCOA1	OK	negbinomial.size	1.99757e-19	2.90254e-19	NCOA1	NCOA1	40
PTRHD1	OK	negbinomial.size	4.22641e-13	5.38722e-13	PTRHD1	PTRHD1	29
ADCY3	OK	negbinomial.size	4.04153e-23	6.29504e-23	ADCY3	ADCY3	12
ASXL2	OK	negbinomial.size	0.00220626	0.00226164	ASXL2	ASXL2	13
RAB10	OK	negbinomial.size	3.22987e-68	9.20717e-68	RAB10	RAB10	949
HADHA	OK	negbinomial.size	2.9937e-11	3.65473e-11	HADHA	HADHA	1173
HADHB	OK	negbinomial.size	1.28961e-09	1.51286e-09	HADHB	HADHB	217
SLC35F6	OK	negbinomial.size	3.11168e-57	7.88017e-57	SLC35F6	SLC35F6	44
OST4	OK	negbinomial.size	5.13993e-56	1.2831e-55	OST4	OST4	4644
EMILIN1	OK	negbinomial.size	1.45755e-102	5.64409e-102	EMILIN1	EMILIN1	25
ATRAID	OK	negbinomial.size	5.53301e-33	1.01574e-32	ATRAID	ATRAID	223
MPV17	OK	negbinomial.size	4.139e-18	5.87068e-18	MPV17	MPV17	15
SNX17	OK	negbinomial.size	4.40567e-28	7.53044e-28	SNX17	SNX17	241
PPM1G	OK	negbinomial.size	3.50732e-43	7.46815e-43	PPM1G	PPM1G	343
NRBP1	OK	negbinomial.size	2.10988e-19	3.06355e-19	NRBP1	NRBP1	160
SLC4A1AP	OK	negbinomial.size	0.00442601	0.00451143	SLC4A1AP	SLC4A1AP	10
MRPL33	OK	negbinomial.size	3.06373e-11	3.73799e-11	MRPL33	MRPL33	215
FOSL2	OK	negbinomial.size	5.57390039668719e-319	6.38237459757243e-318	FOSL2	FOSL2	1165
AC104695.4	OK	negbinomial.size	1.59335e-109	6.529e-109	AC104695.4	AC104695.4	238
AC104695.3	OK	negbinomial.size	2.88969e-31	5.18063e-31	AC104695.3	AC104695.3	14
PPP1CB	OK	negbinomial.size	5.16588e-16	7.02468e-16	PPP1CB	PPP1CB	1732
WDR43	OK	negbinomial.size	1.0848e-36	2.09438e-36	WDR43	WDR43	85
CLIP4	OK	negbinomial.size	1.57147e-68	4.49433e-68	CLIP4	CLIP4	11
YPEL5	OK	negbinomial.size	2.74289e-145	1.44108e-144	YPEL5	YPEL5	1084
LBH	OK	negbinomial.size	9.64527e-93	3.43928e-92	LBH	LBH	57
DPY30	OK	negbinomial.size	3.45741e-12	4.31894e-12	DPY30	DPY30	35
YIPF4	OK	negbinomial.size	0.00277404	0.00283987	YIPF4	YIPF4	145
BIRC6	OK	negbinomial.size	2.7897e-11	3.40908e-11	BIRC6	BIRC6	191
LTBP1	OK	negbinomial.size	0	0	LTBP1	LTBP1	168
RASGRP3	OK	negbinomial.size	1.31587e-107	5.30329e-107	RASGRP3	RASGRP3	123
FEZ2	OK	negbinomial.size	2.93085e-75	8.90152e-75	FEZ2	FEZ2	170
VIT	OK	negbinomial.size	3.21273e-102	1.23937e-101	VIT	VIT	14
GPATCH11	OK	negbinomial.size	3.9652e-25	6.41257e-25	GPATCH11	GPATCH11	42
EIF2AK2	OK	negbinomial.size	8.55896e-146	4.52001e-145	EIF2AK2	EIF2AK2	383
CEBPZOS	OK	negbinomial.size	2.35635e-13	3.01861e-13	CEBPZOS	CEBPZOS	22
CEBPZ	OK	negbinomial.size	5.59373e-14	7.28624e-14	CEBPZ	CEBPZ	145
PRKD3	OK	negbinomial.size	5.38604e-11	6.53882e-11	PRKD3	PRKD3	20
CDC42EP3	OK	negbinomial.size	2.34643e-33	4.33612e-33	CDC42EP3	CDC42EP3	87
CYP1B1	OK	negbinomial.size	0	0	CYP1B1	CYP1B1	2033
GALM	OK	negbinomial.size	1.6927e-162	9.8382e-162	GALM	GALM	189
SRSF7	OK	negbinomial.size	6.63309e-218	5.05402e-217	SRSF7	SRSF7	2722
SOS1	OK	negbinomial.size	0.00052399	0.000543325	SOS1	SOS1	19
SLC8A1	OK	negbinomial.size	3.40779e-93	1.22082e-92	SLC8A1	SLC8A1	316
EML4	OK	negbinomial.size	1.10925e-87	3.79411e-87	EML4	EML4	283
COX7A2L	OK	negbinomial.size	4.81862e-07	5.33892e-07	COX7A2L	COX7A2L	190
ZFP36L2	OK	negbinomial.size	0	0	ZFP36L2	ZFP36L2	6948
LRPPRC	OK	negbinomial.size	1.75427e-28	3.02042e-28	LRPPRC	LRPPRC	47
PPM1B	OK	negbinomial.size	1.41963e-05	1.51694e-05	PPM1B	PPM1B	18
EPAS1	OK	negbinomial.size	3.63564e-68	1.03542e-67	EPAS1	EPAS1	79
RHOQ	OK	negbinomial.size	4.12655e-53	9.95247e-53	RHOQ	RHOQ	1396
MCFD2	OK	negbinomial.size	7.64229e-30	1.33838e-29	MCFD2	MCFD2	64
CALM2	OK	negbinomial.size	5.47964e-39	1.0988e-38	CALM2	CALM2	8487
BCYRN1	OK	negbinomial.size	9.98068e-83	3.26786e-82	BCYRN1	BCYRN1	111
MSH6	OK	negbinomial.size	2.32039e-42	4.89825e-42	MSH6	MSH6	35
FBXO11	OK	negbinomial.size	2.62618e-14	3.45457e-14	FBXO11	FBXO11	68
FOXN2	OK	negbinomial.size	2.78933e-37	5.45751e-37	FOXN2	FOXN2	72
ERLEC1	OK	negbinomial.size	5.47671e-28	9.33769e-28	ERLEC1	ERLEC1	49
PSME4	OK	negbinomial.size	1.68497e-15	2.2706e-15	PSME4	PSME4	90
SPTBN1	OK	negbinomial.size	2.29674e-282	2.32944e-281	SPTBN1	SPTBN1	161
RTN4	OK	negbinomial.size	4.64558e-44	1.00031e-43	RTN4	RTN4	7867
RPS27A	OK	negbinomial.size	3.1411e-226	2.48289e-225	RPS27A	RPS27A	15925
MTIF2	OK	negbinomial.size	2.29441e-12	2.87728e-12	MTIF2	MTIF2	20
CCDC88A	OK	negbinomial.size	2.26547e-80	7.2095e-80	CCDC88A	CCDC88A	4860
PPP4R3B	OK	negbinomial.size	0.0318783	0.0321565	PPP4R3B	PPP4R3B	48
PNPT1	OK	negbinomial.size	1.91612e-40	3.91925e-40	PNPT1	PNPT1	22
EFEMP1	OK	negbinomial.size	6.40043763758439e-318	7.30150468115674e-317	EFEMP1	EFEMP1	138
BCL11A	OK	negbinomial.size	4.5766e-79	1.43849e-78	BCL11A	BCL11A	68
PAPOLG	OK	negbinomial.size	1.00743e-23	1.58691e-23	PAPOLG	PAPOLG	27
REL	OK	negbinomial.size	4.00397e-162	2.32056e-161	REL	REL	1869
AHSA2P	OK	negbinomial.size	2.58965e-39	5.21335e-39	AHSA2P	AHSA2P	14
USP34	OK	negbinomial.size	1.17616e-11	1.45061e-11	USP34	USP34	116
XPO1	OK	negbinomial.size	1.6367e-25	2.66802e-25	XPO1	XPO1	453
CCT4	OK	negbinomial.size	3.83705e-16	5.22931e-16	CCT4	CCT4	444
COMMD1	OK	negbinomial.size	1.11919e-14	1.48563e-14	COMMD1	COMMD1	37
B3GNT2	OK	negbinomial.size	8.24178e-38	1.62554e-37	B3GNT2	B3GNT2	100
MDH1	OK	negbinomial.size	8.8617e-67	2.49251e-66	MDH1	MDH1	150
UGP2	OK	negbinomial.size	2.82459e-10	3.36185e-10	UGP2	UGP2	595
PELI1	OK	negbinomial.size	4.61405e-62	1.23216e-61	PELI1	PELI1	439
AFTPH	OK	negbinomial.size	2.13126e-10	2.54704e-10	AFTPH	AFTPH	73
SERTAD2	OK	negbinomial.size	1.95248e-19	2.83769e-19	SERTAD2	SERTAD2	202
SLC1A4	OK	negbinomial.size	4.34006e-17	6.02885e-17	SLC1A4	SLC1A4	10
CEP68	OK	negbinomial.size	2.18598e-13	2.80328e-13	CEP68	CEP68	32
RAB1A	OK	negbinomial.size	2.22392e-25	3.61181e-25	RAB1A	RAB1A	732
ACTR2	OK	negbinomial.size	1.56572e-153	8.62553e-153	ACTR2	ACTR2	9823
C1D	OK	negbinomial.size	0.380875	0.381248	C1D	C1D	28
PNO1	OK	negbinomial.size	1.69596e-20	2.50771e-20	PNO1	PNO1	21
PPP3R1	OK	negbinomial.size	1.24866e-48	2.85634e-48	PPP3R1	PPP3R1	83
CNRIP1	OK	negbinomial.size	3.35073e-185	2.19301e-184	CNRIP1	CNRIP1	14
PLEK	OK	negbinomial.size	1.36728e-179	8.73404e-179	PLEK	PLEK	5593
ARHGAP25	OK	negbinomial.size	5.34749e-42	1.11957e-41	ARHGAP25	ARHGAP25	36
ANTXR1	OK	negbinomial.size	2.86692e-89	9.92247e-89	ANTXR1	ANTXR1	18
AAK1	OK	negbinomial.size	2.67903e-57	6.79858e-57	AAK1	AAK1	705
ANXA4	OK	negbinomial.size	4.83814e-116	2.09459e-115	ANXA4	ANXA4	367
SNRNP27	OK	negbinomial.size	6.62354e-13	8.40253e-13	SNRNP27	SNRNP27	34
MXD1	OK	negbinomial.size	0	0	MXD1	MXD1	1287
PCBP1	OK	negbinomial.size	4.56378e-58	1.16636e-57	PCBP1	PCBP1	6455
TIA1	OK	negbinomial.size	1.27369e-12	1.60581e-12	TIA1	TIA1	19
PCYOX1	OK	negbinomial.size	1.05789e-80	3.38062e-80	PCYOX1	PCYOX1	30
SNRPG	OK	negbinomial.size	3.36231e-68	9.58023e-68	SNRPG	SNRPG	1020
FAM136A	OK	negbinomial.size	2.93743e-38	5.83297e-38	FAM136A	FAM136A	36
NAGK	OK	negbinomial.size	5.16468e-156	2.89733e-155	NAGK	NAGK	933
MPHOSPH10	OK	negbinomial.size	3.86018e-33	7.10348e-33	MPHOSPH10	MPHOSPH10	42
ZNF638	OK	negbinomial.size	1.19907e-09	1.40772e-09	ZNF638	ZNF638	203
CCT7	OK	negbinomial.size	4.46594e-82	1.44906e-81	CCT7	CCT7	332
EGR4	OK	negbinomial.size	0.0278913	0.0281532	EGR4	EGR4	12
TPRKB	OK	negbinomial.size	8.76152e-38	1.72749e-37	TPRKB	TPRKB	46
ACTG2	OK	negbinomial.size	4.9623e-86	1.67028e-85	ACTG2	ACTG2	35
DGUOK	OK	negbinomial.size	1.80949e-15	2.43678e-15	DGUOK	DGUOK	130
TET3	OK	negbinomial.size	2.41969e-35	4.59344e-35	TET3	TET3	22
BOLA3	OK	negbinomial.size	3.41471e-96	1.25111e-95	BOLA3	BOLA3	71
MOB1A	OK	negbinomial.size	1.83905e-72	5.42418e-72	MOB1A	MOB1A	2376
MTHFD2	OK	negbinomial.size	5.28001e-27	8.82306e-27	MTHFD2	MTHFD2	298
DCTN1	OK	negbinomial.size	2.89302e-09	3.3642e-09	DCTN1	DCTN1	19
AUP1	OK	negbinomial.size	1.31174e-32	2.39301e-32	AUP1	AUP1	384
HK2	OK	negbinomial.size	2.69559e-37	5.27578e-37	HK2	HK2	48
POLE4	OK	negbinomial.size	1.63742e-66	4.58448e-66	POLE4	POLE4	288
SUCLG1	OK	negbinomial.size	3.54712e-14	4.64905e-14	SUCLG1	SUCLG1	57
TMSB10	OK	negbinomial.size	0	0	TMSB10	TMSB10	20624
KCMF1	OK	negbinomial.size	0.0647764	0.0650845	KCMF1	KCMF1	30
TGOLN2	OK	negbinomial.size	5.44598e-42	1.1398e-41	TGOLN2	TGOLN2	2644
CAPG	OK	negbinomial.size	7.09049e-242	5.99949e-241	CAPG	CAPG	3920
MAT2A	OK	negbinomial.size	1.11512e-41	2.32435e-41	MAT2A	MAT2A	767
VAMP8	OK	negbinomial.size	1.76295e-154	9.81803e-154	VAMP8	VAMP8	7807
VAMP5	OK	negbinomial.size	0	0	VAMP5	VAMP5	1451
RNF181	OK	negbinomial.size	1.02041e-46	2.27641e-46	RNF181	RNF181	639
GNLY	OK	negbinomial.size	0	0	GNLY	GNLY	52
ST3GAL5	OK	negbinomial.size	2.9604e-71	8.62359e-71	ST3GAL5	ST3GAL5	111
PTCD3	OK	negbinomial.size	6.63387e-10	7.84084e-10	PTCD3	PTCD3	20
IMMT	OK	negbinomial.size	4.23579e-26	6.97352e-26	IMMT	IMMT	83
MRPL35	OK	negbinomial.size	2.50674e-16	3.42697e-16	MRPL35	MRPL35	11
KDM3A	OK	negbinomial.size	2.28987e-15	3.07626e-15	KDM3A	KDM3A	24
CHMP3	OK	negbinomial.size	2.95946e-23	4.61902e-23	CHMP3	CHMP3	208
RNF103	OK	negbinomial.size	7.55858e-10	8.91831e-10	RNF103	RNF103	26
CD8A	OK	negbinomial.size	2.9963e-42	6.30551e-42	CD8A	CD8A	11
LINC01943	OK	negbinomial.size	3.88629e-111	1.61297e-110	LINC01943	LINC01943	39
CYTOR	OK	negbinomial.size	4.12716e-168	2.47872e-167	CYTOR	CYTOR	629
RNU2-63P	OK	negbinomial.size	1.77238e-122	8.06058e-122	RNU2-63P	RNU2-63P	711
KRCC1	OK	negbinomial.size	3.32675e-13	4.24488e-13	KRCC1	KRCC1	33
EIF2AK3	OK	negbinomial.size	1.10704e-84	3.69173e-84	EIF2AK3	EIF2AK3	132
IGKC	OK	negbinomial.size	0	0	IGKC	IGKC	1210
MRPS5	OK	negbinomial.size	2.70626e-19	3.91836e-19	MRPS5	MRPS5	97
ANKRD36C	OK	negbinomial.size	3.20685e-111	1.33188e-110	ANKRD36C	ANKRD36C	34
DUSP2	OK	negbinomial.size	1.34047e-170	8.19531e-170	DUSP2	DUSP2	1071
STARD7	OK	negbinomial.size	4.65768e-20	6.84079e-20	STARD7	STARD7	156
TMEM127	OK	negbinomial.size	8.74786e-33	1.6016e-32	TMEM127	TMEM127	35
CIAO1	OK	negbinomial.size	3.8582e-06	4.17586e-06	CIAO1	CIAO1	18
SNRNP200	OK	negbinomial.size	6.69282e-13	8.48866e-13	SNRNP200	SNRNP200	70
ARID5A	OK	negbinomial.size	1.69547e-34	3.18311e-34	ARID5A	ARID5A	129
AC092683.1	OK	negbinomial.size	1.17065e-104	4.61184e-104	AC092683.1	AC092683.1	24
ANKRD36B	OK	negbinomial.size	6.92436e-145	3.61933e-144	ANKRD36B	ANKRD36B	97
COX5B	OK	negbinomial.size	7.5691e-63	2.03996e-62	COX5B	COX5B	5588
TMEM131	OK	negbinomial.size	3.05592e-11	3.72993e-11	TMEM131	TMEM131	34
MGAT4A	OK	negbinomial.size	3.72549e-96	1.36416e-95	MGAT4A	MGAT4A	312
MITD1	OK	negbinomial.size	1.18771e-19	1.734e-19	MITD1	MITD1	27
EIF5B	OK	negbinomial.size	6.29387e-128	2.94773e-127	EIF5B	EIF5B	1864
REV1	OK	negbinomial.size	4.24225e-09	4.9136e-09	REV1	REV1	24
PDCL3	OK	negbinomial.size	1.01497e-57	2.58748e-57	PDCL3	PDCL3	147
RPL31	OK	negbinomial.size	1.06539e-49	2.47594e-49	RPL31	RPL31	7086
RNF149	OK	negbinomial.size	0	0	RNF149	RNF149	1527
MAP4K4	OK	negbinomial.size	2.05263e-153	1.12978e-152	MAP4K4	MAP4K4	465
IL1R2	OK	negbinomial.size	0	0	IL1R2	IL1R2	1001
IL1R1	OK	negbinomial.size	3.13802e-289	3.23085e-288	IL1R1	IL1R1	446
IL1RL1	OK	negbinomial.size	9.91419e-124	4.5358e-123	IL1RL1	IL1RL1	17
IL18R1	OK	negbinomial.size	8.37126e-189	5.56811e-188	IL18R1	IL18R1	54
C2orf40	OK	negbinomial.size	2.72858e-65	7.5464e-65	C2orf40	C2orf40	29
GCC2	OK	negbinomial.size	1.30749e-42	2.76577e-42	GCC2	GCC2	589
LIMS1	OK	negbinomial.size	0	0	LIMS1	LIMS1	5959
RANBP2	OK	negbinomial.size	2.97759e-19	4.30612e-19	RANBP2	RANBP2	555
SOWAHC	OK	negbinomial.size	8.67374e-27	1.44233e-26	SOWAHC	SOWAHC	14
MTLN	OK	negbinomial.size	1.81188e-48	4.13701e-48	MTLN	MTLN	72
BUB1	OK	negbinomial.size	5.16063e-97	1.90217e-96	BUB1	BUB1	10
MIR4435-2HG	OK	negbinomial.size	2.03421e-40	4.15941e-40	MIR4435-2HG	MIR4435-2HG	52
BCL2L11	OK	negbinomial.size	3.22267e-42	6.77956e-42	BCL2L11	BCL2L11	93
MERTK	OK	negbinomial.size	1.10432e-292	1.15445e-291	MERTK	MERTK	648
TMEM87B	OK	negbinomial.size	4.0889e-41	8.45095e-41	TMEM87B	TMEM87B	45
TTL	OK	negbinomial.size	1.37221e-46	3.05789e-46	TTL	TTL	74
CHCHD5	OK	negbinomial.size	4.69063e-21	7.00849e-21	CHCHD5	CHCHD5	59
SLC20A1	OK	negbinomial.size	4.58511e-12	5.71019e-12	SLC20A1	SLC20A1	484
CKAP2L	OK	negbinomial.size	3.76307e-166	2.23594e-165	CKAP2L	CKAP2L	24
IL1A	OK	negbinomial.size	2.17361e-28	3.73611e-28	IL1A	IL1A	15
IL1B	OK	negbinomial.size	0	0	IL1B	IL1B	6039
IL1RN	OK	negbinomial.size	0	0	IL1RN	IL1RN	1124
PAX8-AS1	OK	negbinomial.size	4.11725e-44	8.88109e-44	PAX8-AS1	PAX8-AS1	55
SLC35F5	OK	negbinomial.size	1.78159e-10	2.1354e-10	SLC35F5	SLC35F5	28
AC110769.2	OK	negbinomial.size	2.5764e-16	3.52142e-16	AC110769.2	AC110769.2	35
ACTR3	OK	negbinomial.size	8.88237e-147	4.7152e-146	ACTR3	ACTR3	5334
DDX18	OK	negbinomial.size	2.15105e-19	3.12259e-19	DDX18	DDX18	794
CCDC93	OK	negbinomial.size	2.67705e-05	2.84914e-05	CCDC93	CCDC93	16
MARCO	OK	negbinomial.size	0	0	MARCO	MARCO	4034
DBI	OK	negbinomial.size	3.73651e-118	1.64439e-117	DBI	DBI	5290
TMEM37	OK	negbinomial.size	2.30724e-280	2.33237e-279	TMEM37	TMEM37	59
RALB	OK	negbinomial.size	7.71726e-34	1.43565e-33	RALB	RALB	59
TFCP2L1	OK	negbinomial.size	1.17451e-50	2.75461e-50	TFCP2L1	TFCP2L1	10
NIFK	OK	negbinomial.size	2.86511e-28	4.91919e-28	NIFK	NIFK	223
TSN	OK	negbinomial.size	2.38341e-10	2.84117e-10	TSN	TSN	10
GYPC	OK	negbinomial.size	0	0	GYPC	GYPC	2369
BIN1	OK	negbinomial.size	8.33072e-79	2.60643e-78	BIN1	BIN1	154
MAP3K2	OK	negbinomial.size	3.61149e-31	6.45956e-31	MAP3K2	MAP3K2	830
IWS1	OK	negbinomial.size	6.43266e-06	6.93166e-06	IWS1	IWS1	48
WDR33	OK	negbinomial.size	2.14101e-06	2.33336e-06	WDR33	WDR33	14
SFT2D3	OK	negbinomial.size	0.0142243	0.0144101	SFT2D3	SFT2D3	12
UGGT1	OK	negbinomial.size	6.6162e-09	7.6358e-09	UGGT1	UGGT1	28
MZT2B	OK	negbinomial.size	3.03678e-211	2.24136e-210	MZT2B	MZT2B	1679
IMP4	OK	negbinomial.size	3.35959e-38	6.66048e-38	IMP4	IMP4	52
PTPN18	OK	negbinomial.size	2.62804e-42	5.53813e-42	PTPN18	PTPN18	321
PLEKHB2	OK	negbinomial.size	8.38033e-41	1.7268e-40	PLEKHB2	PLEKHB2	965
MZT2A	OK	negbinomial.size	5.05549e-114	2.14771e-113	MZT2A	MZT2A	169
NCKAP5	OK	negbinomial.size	1.08057e-229	8.68708e-229	NCKAP5	NCKAP5	24
MGAT5	OK	negbinomial.size	7.53972e-115	3.23221e-114	MGAT5	MGAT5	25
RAB3GAP1	OK	negbinomial.size	0.0059534	0.00605621	RAB3GAP1	RAB3GAP1	17
UBXN4	OK	negbinomial.size	6.04647e-10	7.15485e-10	UBXN4	UBXN4	1239
MCM6	OK	negbinomial.size	2.91814e-100	1.10417e-99	MCM6	MCM6	24
DARS	OK	negbinomial.size	3.78908e-52	9.04596e-52	DARS	DARS	150
CXCR4	OK	negbinomial.size	0	0	CXCR4	CXCR4	3172
HNMT	OK	negbinomial.size	3.54405e-141	1.80472e-140	HNMT	HNMT	1259
SPOPL	OK	negbinomial.size	2.06218e-11	2.52962e-11	SPOPL	SPOPL	23
KYNU	OK	negbinomial.size	1.21976e-173	7.5707e-173	KYNU	KYNU	458
ZEB2	OK	negbinomial.size	0	0	ZEB2	ZEB2	11586
AC009951.1	OK	negbinomial.size	3.13179e-228	2.50462e-227	AC009951.1	AC009951.1	286
MMADHC	OK	negbinomial.size	5.51305e-16	7.4951e-16	MMADHC	MMADHC	27
RND3	OK	negbinomial.size	0	0	RND3	RND3	487
NMI	OK	negbinomial.size	7.40065e-81	2.37115e-80	NMI	NMI	166
TNFAIP6	OK	negbinomial.size	0	0	TNFAIP6	TNFAIP6	354
RIF1	OK	negbinomial.size	2.61424e-30	4.61656e-30	RIF1	RIF1	168
ARL5A	OK	negbinomial.size	1.67348e-10	2.00778e-10	ARL5A	ARL5A	18
FMNL2	OK	negbinomial.size	4.41761e-266	4.22848e-265	FMNL2	FMNL2	207
PRPF40A	OK	negbinomial.size	2.74355e-27	4.61223e-27	PRPF40A	PRPF40A	1684
NR4A2	OK	negbinomial.size	0	0	NR4A2	NR4A2	5472
CYTIP	OK	negbinomial.size	2.30601e-204	1.66e-203	CYTIP	CYTIP	361
BAZ2B	OK	negbinomial.size	1.47546e-23	2.31583e-23	BAZ2B	BAZ2B	475
2023-03-07	OK	negbinomial.size	0.00016784	0.000175578	2023-03-07	2023-03-07	77
CD302	OK	negbinomial.size	1.14517e-302	1.25274e-301	CD302	CD302	1216
RBMS1	OK	negbinomial.size	4.26361e-58	1.0901e-57	RBMS1	RBMS1	1058
TANK	OK	negbinomial.size	9.15925e-41	1.88604e-40	TANK	TANK	606
PSMD14	OK	negbinomial.size	8.43364e-90	2.93882e-89	PSMD14	PSMD14	283
IFIH1	OK	negbinomial.size	1.64524e-167	9.84249e-167	IFIH1	IFIH1	134
GCA	OK	negbinomial.size	0	0	GCA	GCA	342
SCN9A	OK	negbinomial.size	0	0	SCN9A	SCN9A	80
CERS6	OK	negbinomial.size	1.78965e-39	3.61232e-39	CERS6	CERS6	86
SPC25	OK	negbinomial.size	1.99399e-178	1.26582e-177	SPC25	SPC25	18
DHRS9	OK	negbinomial.size	2.32898e-130	1.11463e-129	DHRS9	DHRS9	205
BBS5	OK	negbinomial.size	8.37652e-44	1.7961e-43	BBS5	BBS5	15
PPIG	OK	negbinomial.size	1.54136e-34	2.89465e-34	PPIG	PPIG	869
KLHL23	OK	negbinomial.size	5.85835e-52	1.3948e-51	KLHL23	KLHL23	21
SSB	OK	negbinomial.size	1.87002e-169	1.13311e-168	SSB	SSB	1678
METTL5	OK	negbinomial.size	2.1382e-24	3.41199e-24	METTL5	METTL5	31
TLK1	OK	negbinomial.size	0.04254	0.0428408	TLK1	TLK1	13
CYBRD1	OK	negbinomial.size	3.8166e-283	3.87736e-282	CYBRD1	CYBRD1	129
DYNC1I2	OK	negbinomial.size	9.73647e-27	1.61641e-26	DYNC1I2	DYNC1I2	587
ITGA6	OK	negbinomial.size	4.72421e-19	6.80633e-19	ITGA6	ITGA6	10
PDK1	OK	negbinomial.size	9.09783e-10	1.07138e-09	PDK1	PDK1	22
MAP3K20	OK	negbinomial.size	0	0	MAP3K20	MAP3K20	669
SP3	OK	negbinomial.size	4.62751e-28	7.90521e-28	SP3	SP3	175
OLA1	OK	negbinomial.size	1.37728e-11	1.69763e-11	OLA1	OLA1	63
CIR1	OK	negbinomial.size	2.88019e-46	6.38351e-46	CIR1	CIR1	213
GPR155	OK	negbinomial.size	3.16434e-208	2.31322e-207	GPR155	GPR155	121
WIPF1	OK	negbinomial.size	1.09596e-64	3.00665e-64	WIPF1	WIPF1	2039
ATP5MC3	OK	negbinomial.size	3.84656e-61	1.01921e-60	ATP5MC3	ATP5MC3	2872
HNRNPA3	OK	negbinomial.size	2.78759e-64	7.60997e-64	HNRNPA3	HNRNPA3	4024
NFE2L2	OK	negbinomial.size	1.32919e-74	4.00721e-74	NFE2L2	NFE2L2	3189
AGPS	OK	negbinomial.size	5.19533e-19	7.47629e-19	AGPS	AGPS	20
PLEKHA3	OK	negbinomial.size	5.66715e-05	5.98568e-05	PLEKHA3	PLEKHA3	29
TTN	OK	negbinomial.size	0	0	TTN	TTN	551
CCDC141	OK	negbinomial.size	0	0	CCDC141	CCDC141	41
SESTD1	OK	negbinomial.size	1.48065e-28	2.55147e-28	SESTD1	SESTD1	60
CWC22	OK	negbinomial.size	0.00181806	0.00186588	CWC22	CWC22	11
UBE2E3	OK	negbinomial.size	2.99059e-09	3.47635e-09	UBE2E3	UBE2E3	34
ITGA4	OK	negbinomial.size	5.45605e-245	4.70095e-244	ITGA4	ITGA4	789
ITPRID2	OK	negbinomial.size	9.21704e-09	1.05896e-08	ITPRID2	ITPRID2	56
DNAJC10	OK	negbinomial.size	4.70527e-31	8.3963e-31	DNAJC10	DNAJC10	101
FRZB	OK	negbinomial.size	1.84165e-37	3.61022e-37	FRZB	FRZB	17
AC096667.1	OK	negbinomial.size	2.41026e-64	6.58575e-64	AC096667.1	AC096667.1	10
ZC3H15	OK	negbinomial.size	1.52233e-22	2.34434e-22	ZC3H15	ZC3H15	1030
ITGAV	OK	negbinomial.size	3.43426e-56	8.59407e-56	ITGAV	ITGAV	176
CALCRL	OK	negbinomial.size	6.74789e-31	1.20167e-30	CALCRL	CALCRL	16
TFPI	OK	negbinomial.size	2.12915e-268	2.06379e-267	TFPI	TFPI	413
COL3A1	OK	negbinomial.size	0	0	COL3A1	COL3A1	364
COL5A2	OK	negbinomial.size	1.41592e-128	6.66713e-128	COL5A2	COL5A2	22
SLC40A1	OK	negbinomial.size	0	0	SLC40A1	SLC40A1	1430
ORMDL1	OK	negbinomial.size	7.89828e-25	1.26961e-24	ORMDL1	ORMDL1	330
GLS	OK	negbinomial.size	1.29275e-22	1.99531e-22	GLS	GLS	650
STAT1	OK	negbinomial.size	0	0	STAT1	STAT1	922
NABP1	OK	negbinomial.size	2.23533e-145	1.17744e-144	NABP1	NABP1	2039
CAVIN2	OK	negbinomial.size	2.36042e-64	6.45246e-64	CAVIN2	CAVIN2	35
SLC39A10	OK	negbinomial.size	7.7077e-83	2.53041e-82	SLC39A10	SLC39A10	134
STK17B	OK	negbinomial.size	1.49141e-226	1.18347e-225	STK17B	STK17B	1721
PGAP1	OK	negbinomial.size	1.29299e-25	2.1111e-25	PGAP1	PGAP1	11
ANKRD44	OK	negbinomial.size	6.44121e-44	1.38404e-43	ANKRD44	ANKRD44	100
SF3B1	OK	negbinomial.size	9.18512e-07	1.01074e-06	SF3B1	SF3B1	1254
COQ10B	OK	negbinomial.size	0.00274565	0.00281128	COQ10B	COQ10B	23
HSPD1	OK	negbinomial.size	2.6549e-182	1.70482e-181	HSPD1	HSPD1	4826
HSPE1	OK	negbinomial.size	5.08111e-107	2.04111e-106	HSPE1	HSPE1	3922
SPATS2L	OK	negbinomial.size	1.66134e-224	1.29319e-223	SPATS2L	SPATS2L	245
SGO2	OK	negbinomial.size	1.14859e-124	5.27063e-124	SGO2	SGO2	32
BZW1	OK	negbinomial.size	2.17296e-79	6.8475e-79	BZW1	BZW1	1595
CLK1	OK	negbinomial.size	4.15918e-40	8.4789e-40	CLK1	CLK1	1048
FAM126B	OK	negbinomial.size	1.58985e-24	2.54227e-24	FAM126B	FAM126B	16
NDUFB3	OK	negbinomial.size	5.85956e-15	7.82552e-15	NDUFB3	NDUFB3	319
CFLAR	OK	negbinomial.size	1.77053e-225	1.39234e-224	CFLAR	CFLAR	3918
CASP8	OK	negbinomial.size	1.45692e-09	1.70619e-09	CASP8	CASP8	24
SUMO1	OK	negbinomial.size	6.42901e-17	8.90841e-17	SUMO1	SUMO1	252
NOP58	OK	negbinomial.size	3.93346e-42	8.25784e-42	NOP58	NOP58	188
BMPR2	OK	negbinomial.size	2.19573e-22	3.36951e-22	BMPR2	BMPR2	25
CYP20A1	OK	negbinomial.size	2.13705e-16	2.93007e-16	CYP20A1	CYP20A1	16
ABI2	OK	negbinomial.size	1.92553e-46	4.28315e-46	ABI2	ABI2	26
RAPH1	OK	negbinomial.size	6.75261e-103	2.62145e-102	RAPH1	RAPH1	112
CD28	OK	negbinomial.size	0	0	CD28	CD28	104
NRP2	OK	negbinomial.size	0	0	NRP2	NRP2	1799
INO80D	OK	negbinomial.size	9.84757e-05	0.000103458	INO80D	INO80D	19
NDUFS1	OK	negbinomial.size	2.10809e-17	2.94574e-17	NDUFS1	NDUFS1	29
EEF1B2	OK	negbinomial.size	5.68621e-154	3.15523e-153	EEF1B2	EEF1B2	8417
KLF7	OK	negbinomial.size	3.53791e-47	7.93601e-47	KLF7	KLF7	208
CREB1	OK	negbinomial.size	1.00714e-09	1.18467e-09	CREB1	CREB1	47
METTL21A	OK	negbinomial.size	0.00371938	0.00379433	METTL21A	METTL21A	14
CCNYL1	OK	negbinomial.size	4.17304e-09	4.83435e-09	CCNYL1	CCNYL1	17
IDH1	OK	negbinomial.size	1.02853e-150	5.57096e-150	IDH1	IDH1	350
PIKFYVE	OK	negbinomial.size	5.30118e-05	5.60785e-05	PIKFYVE	PIKFYVE	21
BARD1	OK	negbinomial.size	1.35468e-52	3.25186e-52	BARD1	BARD1	20
ATIC	OK	negbinomial.size	6.46068e-78	2.00193e-77	ATIC	ATIC	49
FN1	OK	negbinomial.size	0	0	FN1	FN1	5422
XRCC5	OK	negbinomial.size	8.78677e-36	1.67688e-35	XRCC5	XRCC5	1386
RPL37A	OK	negbinomial.size	2.19719e-61	5.83189e-61	RPL37A	RPL37A	17760
IGFBP2	OK	negbinomial.size	6.35155e-154	3.51805e-153	IGFBP2	IGFBP2	69
IGFBP5	OK	negbinomial.size	0	0	IGFBP5	IGFBP5	539
TNS1	OK	negbinomial.size	1.12198e-88	3.85919e-88	TNS1	TNS1	88
CXCR2P1	OK	negbinomial.size	2.15113e-79	6.78222e-79	CXCR2P1	CXCR2P1	36
ARPC2	OK	negbinomial.size	8.91703e-97	3.27689e-96	ARPC2	ARPC2	12368
GPBAR1	OK	negbinomial.size	1.48599e-44	3.23037e-44	GPBAR1	GPBAR1	10
AAMP	OK	negbinomial.size	6.87609e-05	7.23886e-05	AAMP	AAMP	11
PNKD	OK	negbinomial.size	6.84122e-33	1.25477e-32	PNKD	PNKD	162
TMBIM1	OK	negbinomial.size	1.22958e-27	2.07906e-27	TMBIM1	TMBIM1	214
SLC11A1	OK	negbinomial.size	0	0	SLC11A1	SLC11A1	4550
CTDSP1	OK	negbinomial.size	7.12117e-27	1.18641e-26	CTDSP1	CTDSP1	79
VIL1	OK	negbinomial.size	3.09792e-63	8.37504e-63	VIL1	VIL1	20
USP37	OK	negbinomial.size	0.00150623	0.00154844	USP37	USP37	12
CYP27A1	OK	negbinomial.size	4.01872e-244	3.45283e-243	CYP27A1	CYP27A1	277
RETREG2	OK	negbinomial.size	1.99126e-05	2.12314e-05	RETREG2	RETREG2	13
TUBA4A	OK	negbinomial.size	1.77293e-275	1.76029e-274	TUBA4A	TUBA4A	241
DNAJB2	OK	negbinomial.size	1.45561e-09	1.70498e-09	DNAJB2	DNAJB2	14
ACSL3	OK	negbinomial.size	2.24805e-278	2.26506e-277	ACSL3	ACSL3	1361
WDFY1	OK	negbinomial.size	2.87465e-21	4.31092e-21	WDFY1	WDFY1	16
SERPINE2	OK	negbinomial.size	1.29646e-127	6.06267e-127	SERPINE2	SERPINE2	24
CUL3	OK	negbinomial.size	1.83599e-11	2.25667e-11	CUL3	CUL3	53
DOCK10	OK	negbinomial.size	4.93776e-144	2.56128e-143	DOCK10	DOCK10	506
MFF	OK	negbinomial.size	1.37538e-21	2.07374e-21	MFF	MFF	157
AGFG1	OK	negbinomial.size	4.42524e-169	2.67347e-168	AGFG1	AGFG1	1865
CCL20	OK	negbinomial.size	0	0	CCL20	CCL20	4213
PID1	OK	negbinomial.size	3.00316e-157	1.69094e-156	PID1	PID1	446
TRIP12	OK	negbinomial.size	1.63179e-22	2.51227e-22	TRIP12	TRIP12	330
SP110	OK	negbinomial.size	3.05903e-173	1.89289e-172	SP110	SP110	414
SP140L	OK	negbinomial.size	8.49705e-17	1.17448e-16	SP140L	SP140L	16
SP100	OK	negbinomial.size	3.01896e-40	6.16471e-40	SP100	SP100	907
CAB39	OK	negbinomial.size	6.1598e-35	1.16466e-34	CAB39	CAB39	554
ITM2C	OK	negbinomial.size	3.00366e-118	1.32282e-117	ITM2C	ITM2C	31
PSMD1	OK	negbinomial.size	2.06476e-38	4.10672e-38	PSMD1	PSMD1	424
NCL	OK	negbinomial.size	4.48815e-214	3.34075e-213	NCL	NCL	5648
PTMA	OK	negbinomial.size	0	0	PTMA	PTMA	20009
EIF4E2	OK	negbinomial.size	2.00393e-41	4.15998e-41	EIF4E2	EIF4E2	216
GIGYF2	OK	negbinomial.size	0.00233961	0.00239714	GIGYF2	GIGYF2	36
INPP5D	OK	negbinomial.size	2.06094e-42	4.35656e-42	INPP5D	INPP5D	107
DGKD	OK	negbinomial.size	1.66045e-31	2.98648e-31	DGKD	DGKD	30
ARL4C	OK	negbinomial.size	0	0	ARL4C	ARL4C	3205
ACKR3	OK	negbinomial.size	1.44215e-168	8.68694e-168	ACKR3	ACKR3	218
COPS8	OK	negbinomial.size	1.20324e-11	1.4834e-11	COPS8	COPS8	10
COL6A3	OK	negbinomial.size	0	0	COL6A3	COL6A3	147
LRRFIP1	OK	negbinomial.size	9.73007e-142	4.98381e-141	LRRFIP1	LRRFIP1	7246
RAMP1	OK	negbinomial.size	3.29973e-113	1.39024e-112	RAMP1	RAMP1	58
UBE2F	OK	negbinomial.size	4.81303e-20	7.06727e-20	UBE2F	UBE2F	32
NDUFA10	OK	negbinomial.size	5.78768e-05	6.10877e-05	NDUFA10	NDUFA10	92
COPS9	OK	negbinomial.size	1.12191e-15	1.51684e-15	COPS9	COPS9	1145
RNPEPL1	OK	negbinomial.size	2.69477e-16	3.68157e-16	RNPEPL1	RNPEPL1	220
PPP1R7	OK	negbinomial.size	2.86144e-11	3.49605e-11	PPP1R7	PPP1R7	73
HDLBP	OK	negbinomial.size	1.16695e-36	2.25016e-36	HDLBP	HDLBP	711
2023-09-02	OK	negbinomial.size	5.30381e-24	8.40433e-24	2023-09-02	2023-09-02	1119
DTYMK	OK	negbinomial.size	7.05553e-103	2.73731e-102	DTYMK	DTYMK	40
CRBN	OK	negbinomial.size	8.79286e-25	1.41193e-24	CRBN	CRBN	44
ITPR1	OK	negbinomial.size	2.69569e-16	3.68201e-16	ITPR1	ITPR1	56
BHLHE40	OK	negbinomial.size	2.62748e-42	5.53813e-42	BHLHE40	BHLHE40	449
ARL8B	OK	negbinomial.size	9.38755e-67	2.63799e-66	ARL8B	ARL8B	642
EDEM1	OK	negbinomial.size	2.09982e-11	2.5727e-11	EDEM1	EDEM1	69
THUMPD3-AS1	OK	negbinomial.size	2.82874e-37	5.53275e-37	THUMPD3-AS1	THUMPD3-AS1	874
SETD5	OK	negbinomial.size	1.58218e-07	1.77095e-07	SETD5	SETD5	40
MTMR14	OK	negbinomial.size	3.85077e-08	4.36122e-08	MTMR14	MTMR14	52
CAMK1	OK	negbinomial.size	1.20826e-17	1.69806e-17	CAMK1	CAMK1	80
TADA3	OK	negbinomial.size	5.82126e-07	6.43817e-07	TADA3	TADA3	22
ARPC4	OK	negbinomial.size	4.08656e-105	1.61303e-104	ARPC4	ARPC4	2666
EMC3	OK	negbinomial.size	1.77853e-09	2.07727e-09	EMC3	EMC3	108
BRK1	OK	negbinomial.size	4.54821e-22	6.9361e-22	BRK1	BRK1	1602
VHL	OK	negbinomial.size	4.38169e-06	4.73659e-06	VHL	VHL	22
IRAK2	OK	negbinomial.size	2.23038e-51	5.26524e-51	IRAK2	IRAK2	14
SEC13	OK	negbinomial.size	2.144e-16	2.93894e-16	SEC13	SEC13	45
HRH1	OK	negbinomial.size	3.24954e-88	1.1146e-87	HRH1	HRH1	36
ATG7	OK	negbinomial.size	2.95901e-30	5.21487e-30	ATG7	ATG7	24
VGLL4	OK	negbinomial.size	1.74264e-21	2.62296e-21	VGLL4	VGLL4	21
TIMP4	OK	negbinomial.size	5.21229e-14	6.7995e-14	TIMP4	TIMP4	15
PPARG	OK	negbinomial.size	1.12443e-116	4.8853e-116	PPARG	PPARG	72
RAF1	OK	negbinomial.size	7.60436e-06	8.1813e-06	RAF1	RAF1	24
RPL32	OK	negbinomial.size	1.77488e-117	7.77192e-117	RPL32	RPL32	18212
IQSEC1	OK	negbinomial.size	1.49209e-52	3.57751e-52	IQSEC1	IQSEC1	71
FBLN2	OK	negbinomial.size	0	1.72052e-307	FBLN2	FBLN2	87
TMEM43	OK	negbinomial.size	2.54633e-17	3.5565e-17	TMEM43	TMEM43	13
XPC	OK	negbinomial.size	1.28288e-06	1.40614e-06	XPC	XPC	29
LSM3	OK	negbinomial.size	3.95837e-47	8.86941e-47	LSM3	LSM3	314
SLC6A6	OK	negbinomial.size	2.9649e-132	1.43694e-131	SLC6A6	SLC6A6	211
CCDC174	OK	negbinomial.size	5.54951e-09	6.41318e-09	CCDC174	CCDC174	13
FGD5-AS1	OK	negbinomial.size	4.32314e-30	7.60148e-30	FGD5-AS1	FGD5-AS1	181
MRPS25	OK	negbinomial.size	2.7171e-20	4.00407e-20	MRPS25	MRPS25	15
SH3BP5	OK	negbinomial.size	1.10358e-190	7.38855e-190	SH3BP5	SH3BP5	1020
EAF1	OK	negbinomial.size	5.73615e-93	2.05255e-92	EAF1	EAF1	108
ANKRD28	OK	negbinomial.size	7.68286e-252	6.88087e-251	ANKRD28	ANKRD28	855
GALNT15	OK	negbinomial.size	5.12897e-58	1.30972e-57	GALNT15	GALNT15	20
DPH3	OK	negbinomial.size	7.34513e-36	1.40438e-35	DPH3	DPH3	73
RFTN1	OK	negbinomial.size	1.6928e-39	3.41908e-39	RFTN1	RFTN1	26
TBC1D5	OK	negbinomial.size	4.80648e-21	7.17984e-21	TBC1D5	TBC1D5	51
SATB1	OK	negbinomial.size	7.10838e-108	2.87432e-107	SATB1	SATB1	282
RAB5A	OK	negbinomial.size	0.374244	0.374673	RAB5A	RAB5A	77
UBE2E2	OK	negbinomial.size	9.41546e-19	1.34922e-18	UBE2E2	UBE2E2	21
UBE2E1	OK	negbinomial.size	2.05873e-08	2.34376e-08	UBE2E1	UBE2E1	44
RPL15	OK	negbinomial.size	6.78949e-136	3.35152e-135	RPL15	RPL15	14880
NR1D2	OK	negbinomial.size	8.44003e-56	2.09836e-55	NR1D2	NR1D2	54
TOP2B	OK	negbinomial.size	0.0012807	0.00131925	TOP2B	TOP2B	45
NGLY1	OK	negbinomial.size	6.22438e-06	6.70958e-06	NGLY1	NGLY1	13
SLC4A7	OK	negbinomial.size	1.02118e-121	4.61338e-121	SLC4A7	SLC4A7	502
CMC1	OK	negbinomial.size	1.73101e-13	2.2259e-13	CMC1	CMC1	24
AZI2	OK	negbinomial.size	3.99008e-75	1.20946e-74	AZI2	AZI2	341
RBMS3	OK	negbinomial.size	1.03178e-163	6.0485e-163	RBMS3	RBMS3	30
TGFBR2	OK	negbinomial.size	1.72176e-142	8.86345e-142	TGFBR2	TGFBR2	396
STT3B	OK	negbinomial.size	2.08407e-42	4.40394e-42	STT3B	STT3B	297
CMTM7	OK	negbinomial.size	3.73318e-14	4.88977e-14	CMTM7	CMTM7	48
CMTM6	OK	negbinomial.size	7.62449e-81	2.44031e-80	CMTM6	CMTM6	2000
DYNC1LI1	OK	negbinomial.size	3.18289e-06	3.45105e-06	DYNC1LI1	DYNC1LI1	106
GLB1	OK	negbinomial.size	3.18629e-17	4.44427e-17	GLB1	GLB1	38
CRTAP	OK	negbinomial.size	1.60572e-44	3.48817e-44	CRTAP	CRTAP	536
SUSD5	OK	negbinomial.size	3.7127e-22	5.67607e-22	SUSD5	SUSD5	12
UBP1	OK	negbinomial.size	9.23575e-11	1.11462e-10	UBP1	UBP1	15
CLASP2	OK	negbinomial.size	0.000167903	0.000175614	CLASP2	CLASP2	11
PDCD6IP	OK	negbinomial.size	3.68257e-18	5.22693e-18	PDCD6IP	PDCD6IP	221
EPM2AIP1	OK	negbinomial.size	1.83415e-17	2.56647e-17	EPM2AIP1	EPM2AIP1	63
LRRFIP2	OK	negbinomial.size	4.8946e-05	5.18132e-05	LRRFIP2	LRRFIP2	25
GOLGA4	OK	negbinomial.size	3.45514e-142	1.7742e-141	GOLGA4	GOLGA4	1092
ACAA1	OK	negbinomial.size	2.05106e-22	3.15064e-22	ACAA1	ACAA1	87
MYD88	OK	negbinomial.size	1.08904e-92	3.87874e-92	MYD88	MYD88	127
OXSR1	OK	negbinomial.size	1.60938e-56	4.04059e-56	OXSR1	OXSR1	69
CSRNP1	OK	negbinomial.size	1.4651e-87	5.00013e-87	CSRNP1	CSRNP1	435
CX3CR1	OK	negbinomial.size	9.97805e-214	7.41815e-213	CX3CR1	CX3CR1	85
RPSA	OK	negbinomial.size	1.59084e-240	1.33683e-239	RPSA	RPSA	10807
EIF1B	OK	negbinomial.size	6.8745e-36	1.31481e-35	EIF1B	EIF1B	510
RPL14	OK	negbinomial.size	1.77822e-93	6.38909e-93	RPL14	RPL14	14435
CTNNB1	OK	negbinomial.size	7.796e-120	3.47333e-119	CTNNB1	CTNNB1	1606
SS18L2	OK	negbinomial.size	1.24201e-08	1.42216e-08	SS18L2	SS18L2	51
NKTR	OK	negbinomial.size	4.05591e-63	1.09504e-62	NKTR	NKTR	421
HIGD1A	OK	negbinomial.size	0.00226749	0.00232401	HIGD1A	HIGD1A	14
SNRK	OK	negbinomial.size	5.70244e-40	1.16057e-39	SNRK	SNRK	26
ABHD5	OK	negbinomial.size	2.5911e-87	8.81839e-87	ABHD5	ABHD5	439
ZDHHC3	OK	negbinomial.size	4.46179e-10	5.28806e-10	ZDHHC3	ZDHHC3	21
CDCP1	OK	negbinomial.size	4.04414e-131	1.94614e-130	CDCP1	CDCP1	172
TMEM158	OK	negbinomial.size	2.14081e-115	9.24214e-115	TMEM158	TMEM158	130
CCR1	OK	negbinomial.size	8.16011e-218	6.20209e-217	CCR1	CCR1	1267
CCR2	OK	negbinomial.size	1.33758e-194	9.1861e-194	CCR2	CCR2	26
CCR5	OK	negbinomial.size	1.021e-36	1.97307e-36	CCR5	CCR5	14
CCRL2	OK	negbinomial.size	1.15193e-133	5.62735e-133	CCRL2	CCRL2	164
CCDC12	OK	negbinomial.size	7.97337e-15	1.06184e-14	CCDC12	CCDC12	24
SETD2	OK	negbinomial.size	0.00807136	0.00819714	SETD2	SETD2	77
KLHL18	OK	negbinomial.size	8.63628e-05	9.08411e-05	KLHL18	KLHL18	20
SMARCC1	OK	negbinomial.size	8.00857e-22	1.21467e-21	SMARCC1	SMARCC1	89
MAP4	OK	negbinomial.size	1.42216e-33	2.63605e-33	MAP4	MAP4	161
TMA7	OK	negbinomial.size	3.76192e-65	1.03669e-64	TMA7	TMA7	6155
SHISA5	OK	negbinomial.size	1.61314e-44	3.50305e-44	SHISA5	SHISA5	170
UQCRC1	OK	negbinomial.size	4.1144e-97	1.51745e-96	UQCRC1	UQCRC1	517
IP6K2	OK	negbinomial.size	7.27445e-10	8.58637e-10	IP6K2	IP6K2	13
PRKAR2A	OK	negbinomial.size	2.23757e-25	3.63301e-25	PRKAR2A	PRKAR2A	151
ARIH2	OK	negbinomial.size	0.00484773	0.00493637	ARIH2	ARIH2	55
NDUFAF3	OK	negbinomial.size	1.2215e-34	2.2996e-34	NDUFAF3	NDUFAF3	260
IMPDH2	OK	negbinomial.size	5.63822e-47	1.25874e-46	IMPDH2	IMPDH2	82
QARS	OK	negbinomial.size	9.00544e-10	1.06071e-09	QARS	QARS	40
LAMB2	OK	negbinomial.size	2.53996e-68	7.2506e-68	LAMB2	LAMB2	11
C3orf62	OK	negbinomial.size	3.11656e-07	3.46498e-07	C3orf62	C3orf62	18
USP4	OK	negbinomial.size	6.10438e-05	6.43418e-05	USP4	USP4	36
GPX1	OK	negbinomial.size	0	0	GPX1	GPX1	17015
RHOA	OK	negbinomial.size	4.46655e-55	1.1002e-54	RHOA	RHOA	9444
GMPPB	OK	negbinomial.size	7.68679e-19	1.10331e-18	GMPPB	GMPPB	10
RBM6	OK	negbinomial.size	9.91862e-07	1.09048e-06	RBM6	RBM6	78
RBM5	OK	negbinomial.size	1.59847e-24	2.55538e-24	RBM5	RBM5	97
GNAI2	OK	negbinomial.size	2.70394e-48	6.15546e-48	GNAI2	GNAI2	11195
IFRD2	OK	negbinomial.size	5.44918e-33	1.00065e-32	IFRD2	IFRD2	12
TUSC2	OK	negbinomial.size	9.51019e-26	1.55607e-25	TUSC2	TUSC2	17
RASSF1	OK	negbinomial.size	5.17576e-36	9.91454e-36	RASSF1	RASSF1	16
MAPKAPK3	OK	negbinomial.size	1.01697e-61	2.70867e-61	MAPKAPK3	MAPKAPK3	171
MANF	OK	negbinomial.size	1.46263e-69	4.21254e-69	MANF	MANF	882
TEX264	OK	negbinomial.size	1.44433e-11	1.77921e-11	TEX264	TEX264	28
RPL29	OK	negbinomial.size	2.21112e-105	8.74454e-105	RPL29	RPL29	16590
ALAS1	OK	negbinomial.size	5.7667e-07	6.37898e-07	ALAS1	ALAS1	11
TWF2	OK	negbinomial.size	1.1708e-39	2.37337e-39	TWF2	TWF2	499
WDR82	OK	negbinomial.size	3.79096e-06	4.1038e-06	WDR82	WDR82	109
NISCH	OK	negbinomial.size	8.38681e-75	2.53092e-74	NISCH	NISCH	128
STAB1	OK	negbinomial.size	0	0	STAB1	STAB1	7053
NT5DC2	OK	negbinomial.size	1.00907e-114	4.32278e-114	NT5DC2	NT5DC2	151
SMIM4	OK	negbinomial.size	9.64438e-23	1.49233e-22	SMIM4	SMIM4	119
PBRM1	OK	negbinomial.size	2.51693e-26	4.15375e-26	PBRM1	PBRM1	375
GNL3	OK	negbinomial.size	2.68144e-43	5.71356e-43	GNL3	GNL3	110
SPCS1	OK	negbinomial.size	2.41564e-13	3.09327e-13	SPCS1	SPCS1	688
PRKCD	OK	negbinomial.size	2.04961e-08	2.33382e-08	PRKCD	PRKCD	16
TKT	OK	negbinomial.size	0	0	TKT	TKT	2690
DCP1A	OK	negbinomial.size	0.00192762	0.00197733	DCP1A	DCP1A	24
SELENOK	OK	negbinomial.size	2.53769e-48	5.78559e-48	SELENOK	SELENOK	1019
CCDC66	OK	negbinomial.size	6.69779e-06	7.21355e-06	CCDC66	CCDC66	17
TASOR	OK	negbinomial.size	7.9278e-09	9.12889e-09	TASOR	TASOR	71
ARHGEF3	OK	negbinomial.size	1.20551e-39	2.44293e-39	ARHGEF3	ARHGEF3	16
APPL1	OK	negbinomial.size	2.38765e-84	7.93638e-84	APPL1	APPL1	283
ARF4	OK	negbinomial.size	2.64178e-12	3.3102e-12	ARF4	ARF4	653
FLNB	OK	negbinomial.size	5.16997e-148	2.76122e-147	FLNB	FLNB	132
DNASE1L3	OK	negbinomial.size	8.71711e-28	1.47884e-27	DNASE1L3	DNASE1L3	16
PXK	OK	negbinomial.size	1.48268e-48	3.38788e-48	PXK	PXK	40
PDHB	OK	negbinomial.size	3.62391e-05	3.85017e-05	PDHB	PDHB	12
THOC7	OK	negbinomial.size	1.10908e-10	1.33745e-10	THOC7	THOC7	110
PSMD6	OK	negbinomial.size	4.02338e-09	4.66451e-09	PSMD6	PSMD6	45
KBTBD8	OK	negbinomial.size	2.8296e-37	5.53275e-37	KBTBD8	KBTBD8	102
SUCLG2	OK	negbinomial.size	2.96021e-28	5.07962e-28	SUCLG2	SUCLG2	32
TMF1	OK	negbinomial.size	0.00312382	0.00319452	TMF1	TMF1	171
ARL6IP5	OK	negbinomial.size	1.45761e-64	3.99165e-64	ARL6IP5	ARL6IP5	2855
FRMD4B	OK	negbinomial.size	0	0	FRMD4B	FRMD4B	982
MITF	OK	negbinomial.size	2.89564e-118	1.27616e-117	MITF	MITF	126
FOXP1	OK	negbinomial.size	2.24453e-67	6.35103e-67	FOXP1	FOXP1	1205
LINC00877	OK	negbinomial.size	4.832e-57	1.22166e-56	LINC00877	LINC00877	10
RYBP	OK	negbinomial.size	9.06663e-63	2.44141e-62	RYBP	RYBP	370
PPP4R2	OK	negbinomial.size	2.99704e-20	4.41449e-20	PPP4R2	PPP4R2	98
GBE1	OK	negbinomial.size	1.02347e-15	1.38528e-15	GBE1	GBE1	18
CHMP2B	OK	negbinomial.size	0.000793941	0.000820598	CHMP2B	CHMP2B	110
CGGBP1	OK	negbinomial.size	4.58257e-05	4.85773e-05	CGGBP1	CGGBP1	63
CRYBG3	OK	negbinomial.size	8.8885e-25	1.42691e-24	CRYBG3	CRYBG3	22
CLDND1	OK	negbinomial.size	1.12941e-08	1.29492e-08	CLDND1	CLDND1	15
ST3GAL6	OK	negbinomial.size	1.27395e-61	3.38872e-61	ST3GAL6	ST3GAL6	109
COL8A1	OK	negbinomial.size	5.21181e-36	9.98048e-36	COL8A1	COL8A1	12
CMSS1	OK	negbinomial.size	1.58316e-58	4.06985e-58	CMSS1	CMSS1	27
FILIP1L	OK	negbinomial.size	0	0	FILIP1L	FILIP1L	1383
NIT2	OK	negbinomial.size	1.49913e-26	2.48275e-26	NIT2	NIT2	16
TOMM70	OK	negbinomial.size	7.58782e-15	1.01138e-14	TOMM70	TOMM70	13
TFG	OK	negbinomial.size	2.78344e-08	3.16293e-08	TFG	TFG	40
ABI3BP	OK	negbinomial.size	0	0	ABI3BP	ABI3BP	119
SENP7	OK	negbinomial.size	3.18207e-17	4.43939e-17	SENP7	SENP7	10
TRMT10C	OK	negbinomial.size	1.37469e-09	1.61174e-09	TRMT10C	TRMT10C	41
PCNP	OK	negbinomial.size	8.27028e-06	8.88058e-06	PCNP	PCNP	113
ZBTB11	OK	negbinomial.size	0.000144598	0.000151446	ZBTB11	ZBTB11	62
RPL24	OK	negbinomial.size	2.40892e-65	6.66834e-65	RPL24	RPL24	14804
NFKBIZ	OK	negbinomial.size	2.47606e-146	1.30874e-145	NFKBIZ	NFKBIZ	2478
ALCAM	OK	negbinomial.size	0	0	ALCAM	ALCAM	1609
CBLB	OK	negbinomial.size	7.79081e-42	1.62723e-41	CBLB	CBLB	28
BBX	OK	negbinomial.size	1.24683e-53	3.02499e-53	BBX	BBX	267
CD47	OK	negbinomial.size	9.02981e-126	4.17169e-125	CD47	CD47	557
GCSAM	OK	negbinomial.size	2.61288e-48	5.95036e-48	GCSAM	GCSAM	16
ATG3	OK	negbinomial.size	2.45006e-44	5.30543e-44	ATG3	ATG3	585
CCDC80	OK	negbinomial.size	0	0	CCDC80	CCDC80	326
BOC	OK	negbinomial.size	8.98934e-119	3.97608e-118	BOC	BOC	14
SIDT1	OK	negbinomial.size	1.59775e-27	2.69563e-27	SIDT1	SIDT1	12
NAA50	OK	negbinomial.size	9.93057e-65	2.72679e-64	NAA50	NAA50	380
ATP6V1A	OK	negbinomial.size	4.40788e-20	6.47546e-20	ATP6V1A	ATP6V1A	217
ZBTB20	OK	negbinomial.size	1.41323e-174	8.80715e-174	ZBTB20	ZBTB20	80
B4GALT4	OK	negbinomial.size	0.000490501	0.000508945	B4GALT4	B4GALT4	20
ARHGAP31	OK	negbinomial.size	5.24802e-10	6.21605e-10	ARHGAP31	ARHGAP31	11
POGLUT1	OK	negbinomial.size	1.76255e-08	2.00993e-08	POGLUT1	POGLUT1	22
TIMMDC1	OK	negbinomial.size	1.44985e-09	1.69856e-09	TIMMDC1	TIMMDC1	26
CD80	OK	negbinomial.size	4.75688e-96	1.74078e-95	CD80	CD80	17
COX17	OK	negbinomial.size	1.52297e-55	3.7711e-55	COX17	COX17	786
GSK3B	OK	negbinomial.size	0.00908373	0.00921765	GSK3B	GSK3B	13
LRRC58	OK	negbinomial.size	7.11975e-50	1.65776e-49	LRRC58	LRRC58	88
FSTL1	OK	negbinomial.size	0	0	FSTL1	FSTL1	232
NDUFB4	OK	negbinomial.size	1.06106e-12	1.3405e-12	NDUFB4	NDUFB4	778
HCLS1	OK	negbinomial.size	2.73543e-196	1.89562e-195	HCLS1	HCLS1	4948
GOLGB1	OK	negbinomial.size	3.15126e-209	2.31193e-208	GOLGB1	GOLGB1	1203
EAF2	OK	negbinomial.size	7.9395e-18	1.12068e-17	EAF2	EAF2	28
CD86	OK	negbinomial.size	3.20826e-145	1.68269e-144	CD86	CD86	887
CSTA	OK	negbinomial.size	0	0	CSTA	CSTA	640
FAM162A	OK	negbinomial.size	1.21128e-52	2.90879e-52	FAM162A	FAM162A	98
KPNA1	OK	negbinomial.size	1.22674e-12	1.54726e-12	KPNA1	KPNA1	20
PARP9	OK	negbinomial.size	1.23232e-100	4.6831e-100	PARP9	PARP9	196
DTX3L	OK	negbinomial.size	1.23119e-55	3.05232e-55	DTX3L	DTX3L	70
PARP14	OK	negbinomial.size	4.87461e-256	4.51768e-255	PARP14	PARP14	692
MYLK	OK	negbinomial.size	6.06121e-138	3.03854e-137	MYLK	MYLK	67
CCDC14	OK	negbinomial.size	1.11564e-35	2.12711e-35	CCDC14	CCDC14	19
ITGB5	OK	negbinomial.size	1.65007e-192	1.12315e-191	ITGB5	ITGB5	175
HEG1	OK	negbinomial.size	1.80747e-25	2.94171e-25	HEG1	HEG1	10
ZNF148	OK	negbinomial.size	5.98653e-12	7.44035e-12	ZNF148	ZNF148	73
OSBPL11	OK	negbinomial.size	3.29712e-11	4.01873e-11	OSBPL11	OSBPL11	399
TPRA1	OK	negbinomial.size	1.19555e-14	1.58527e-14	TPRA1	TPRA1	19
MGLL	OK	negbinomial.size	1.1068e-305	1.2283e-304	MGLL	MGLL	584
SEC61A1	OK	negbinomial.size	4.35484e-59	1.1285e-58	SEC61A1	SEC61A1	282
RUVBL1	OK	negbinomial.size	2.20944e-44	4.78607e-44	RUVBL1	RUVBL1	28
GATA2	OK	negbinomial.size	4.57105e-149	2.45419e-148	GATA2	GATA2	32
RPN1	OK	negbinomial.size	7.2828e-121	3.26846e-120	RPN1	RPN1	1284
RAB7A	OK	negbinomial.size	4.13163e-17	5.74453e-17	RAB7A	RAB7A	1505
CNBP	OK	negbinomial.size	9.89009e-24	1.5587e-23	CNBP	CNBP	2226
H1FX	OK	negbinomial.size	1.94415e-37	3.80994e-37	H1FX	H1FX	1511
MBD4	OK	negbinomial.size	6.65984e-10	7.86851e-10	MBD4	MBD4	158
PLXND1	OK	negbinomial.size	5.89515e-236	4.85399e-235	PLXND1	PLXND1	713
ATP2C1	OK	negbinomial.size	6.60609e-49	1.51683e-48	ATP2C1	ATP2C1	76
NUDT16	OK	negbinomial.size	4.98341e-94	1.80108e-93	NUDT16	NUDT16	384
MRPL3	OK	negbinomial.size	1.55276e-47	3.50357e-47	MRPL3	MRPL3	98
DNAJC13	OK	negbinomial.size	3.83568e-22	5.86261e-22	DNAJC13	DNAJC13	37
NPHP3	OK	negbinomial.size	5.35645e-24	8.48555e-24	NPHP3	NPHP3	10
CDV3	OK	negbinomial.size	5.38142e-100	2.02996e-99	CDV3	CDV3	4361
TOPBP1	OK	negbinomial.size	6.69609e-23	1.03796e-22	TOPBP1	TOPBP1	18
SRPRB	OK	negbinomial.size	9.50149e-46	2.09299e-45	SRPRB	SRPRB	42
ANAPC13	OK	negbinomial.size	1.21791e-07	1.36472e-07	ANAPC13	ANAPC13	28
CEP63	OK	negbinomial.size	0.00345448	0.0035282	CEP63	CEP63	19
MSL2	OK	negbinomial.size	0.000369602	0.000384151	MSL2	MSL2	12
STAG1	OK	negbinomial.size	4.92083e-13	6.26194e-13	STAG1	STAG1	22
NCK1	OK	negbinomial.size	1.0014e-15	1.35571e-15	NCK1	NCK1	17
ARMC8	OK	negbinomial.size	9.92787e-05	0.000104283	ARMC8	ARMC8	11
MRAS	OK	negbinomial.size	4.27771e-59	1.10945e-58	MRAS	MRAS	33
PIK3CB	OK	negbinomial.size	1.03849e-32	1.89792e-32	PIK3CB	PIK3CB	10
COPB2	OK	negbinomial.size	1.3253e-12	1.66985e-12	COPB2	COPB2	131
RBP1	OK	negbinomial.size	1.3072e-136	6.48415e-136	RBP1	RBP1	35
SLC25A36	OK	negbinomial.size	8.46393e-14	1.09689e-13	SLC25A36	SLC25A36	91
ZBTB38	OK	negbinomial.size	1.083e-94	3.93271e-94	ZBTB38	ZBTB38	100
RASA2	OK	negbinomial.size	5.30677e-23	8.24063e-23	RASA2	RASA2	46
RNF7	OK	negbinomial.size	3.86246e-87	1.31234e-86	RNF7	RNF7	1299
ATP1B3	OK	negbinomial.size	0	0	ATP1B3	ATP1B3	6124
TFDP2	OK	negbinomial.size	8.78903e-21	1.30588e-20	TFDP2	TFDP2	49
GK5	OK	negbinomial.size	2.1591e-191	1.45829e-190	GK5	GK5	68
XRN1	OK	negbinomial.size	1.23184e-61	3.27813e-61	XRN1	XRN1	89
PCOLCE2	OK	negbinomial.size	5.03254774790696e-312	5.66716682052902e-311	PCOLCE2	PCOLCE2	155
U2SURP	OK	negbinomial.size	3.33331e-32	6.04675e-32	U2SURP	U2SURP	372
CHST2	OK	negbinomial.size	1.26854e-51	3.00739e-51	CHST2	CHST2	11
SLC9A9	OK	negbinomial.size	3.94966e-98	1.47175e-97	SLC9A9	SLC9A9	52
DIPK2A	OK	negbinomial.size	1.04715e-08	1.20196e-08	DIPK2A	DIPK2A	206
PLOD2	OK	negbinomial.size	1.90478e-32	3.4656e-32	PLOD2	PLOD2	13
PLSCR1	OK	negbinomial.size	4.04641e-193	2.76347e-192	PLSCR1	PLSCR1	1098
CPB1	OK	negbinomial.size	3.24062e-62	8.66522e-62	CPB1	CPB1	11
CPA3	OK	negbinomial.size	0	0	CPA3	CPA3	90
GYG1	OK	negbinomial.size	7.08475e-31	1.26093e-30	GYG1	GYG1	35
HPS3	OK	negbinomial.size	1.96493e-16	2.69589e-16	HPS3	HPS3	54
CP	OK	negbinomial.size	2.39613e-34	4.49165e-34	CP	CP	22
TM4SF1	OK	negbinomial.size	8.80565e-45	1.91969e-44	TM4SF1	TM4SF1	48
WWTR1	OK	negbinomial.size	3.28159e-78	1.02149e-77	WWTR1	WWTR1	28
COMMD2	OK	negbinomial.size	0.00147375	0.00151581	COMMD2	COMMD2	15
RNF13	OK	negbinomial.size	1.63862e-56	4.11234e-56	RNF13	RNF13	1345
TSC22D2	OK	negbinomial.size	1.14171e-21	1.72439e-21	TSC22D2	TSC22D2	211
SERP1	OK	negbinomial.size	9.37565e-197	6.51193e-196	SERP1	SERP1	5748
EIF2A	OK	negbinomial.size	6.84692e-05	7.2094e-05	EIF2A	EIF2A	86
SELENOT	OK	negbinomial.size	8.75726e-22	1.32593e-21	SELENOT	SELENOT	628
SIAH2	OK	negbinomial.size	1.28697e-20	1.90711e-20	SIAH2	SIAH2	158
MED12L	OK	negbinomial.size	1.16572e-08	1.33555e-08	MED12L	MED12L	16
GPR171	OK	negbinomial.size	2.17698e-73	6.48015e-73	GPR171	GPR171	22
P2RY14	OK	negbinomial.size	1.60209e-216	1.2057e-215	P2RY14	P2RY14	43
P2RY13	OK	negbinomial.size	5.35038e-155	2.99055e-154	P2RY13	P2RY13	303
IGSF10	OK	negbinomial.size	1.77349e-134	8.69847e-134	IGSF10	IGSF10	29
SUCNR1	OK	negbinomial.size	3.42763e-107	1.3778e-106	SUCNR1	SUCNR1	84
MBNL1	OK	negbinomial.size	2.22479e-15	2.9908e-15	MBNL1	MBNL1	3717
P2RY1	OK	negbinomial.size	5.72672e-80	1.81395e-79	P2RY1	P2RY1	101
RAP2B	OK	negbinomial.size	6.84962e-117	2.98653e-116	RAP2B	RAP2B	1498
DHX36	OK	negbinomial.size	0.00141111	0.00145211	DHX36	DHX36	450
SLC33A1	OK	negbinomial.size	4.98818e-08	5.63481e-08	SLC33A1	SLC33A1	13
GMPS	OK	negbinomial.size	3.46157e-19	5.00014e-19	GMPS	GMPS	11
SSR3	OK	negbinomial.size	1.5336e-70	4.44411e-70	SSR3	SSR3	1533
TIPARP	OK	negbinomial.size	5.87693e-154	3.2581e-153	TIPARP	TIPARP	1172
CCNL1	OK	negbinomial.size	2.34938e-62	6.29585e-62	CCNL1	CCNL1	3399
PTX3	OK	negbinomial.size	1.1262e-54	2.76295e-54	PTX3	PTX3	127
RSRC1	OK	negbinomial.size	2.52524e-40	5.15999e-40	RSRC1	RSRC1	43
RARRES1	OK	negbinomial.size	0	0	RARRES1	RARRES1	119
MFSD1	OK	negbinomial.size	2.57264e-217	1.95049e-216	MFSD1	MFSD1	3684
SMC4	OK	negbinomial.size	4.65774e-100	1.75806e-99	SMC4	SMC4	300
KPNA4	OK	negbinomial.size	9.65486e-13	1.2205e-12	KPNA4	KPNA4	427
PDCD10	OK	negbinomial.size	1.19703e-05	1.28065e-05	PDCD10	PDCD10	143
GOLIM4	OK	negbinomial.size	1.90861e-273	1.87977e-272	GOLIM4	GOLIM4	401
SEC62	OK	negbinomial.size	2.49831e-30	4.41437e-30	SEC62	SEC62	2167
PHC3	OK	negbinomial.size	1.01066e-11	1.2495e-11	PHC3	PHC3	17
SKIL	OK	negbinomial.size	9.72557e-85	3.2468e-84	SKIL	SKIL	1169
RPL22L1	OK	negbinomial.size	6.56926e-22	9.97602e-22	RPL22L1	RPL22L1	974
FNDC3B	OK	negbinomial.size	0	0	FNDC3B	FNDC3B	1473
TNFSF10	OK	negbinomial.size	0	0	TNFSF10	TNFSF10	662
NCEH1	OK	negbinomial.size	1.36417e-203	9.76271e-203	NCEH1	NCEH1	312
TBL1XR1	OK	negbinomial.size	7.61413e-35	1.43786e-34	TBL1XR1	TBL1XR1	241
ZMAT3	OK	negbinomial.size	9.33752e-27	1.55186e-26	ZMAT3	ZMAT3	61
PIK3CA	OK	negbinomial.size	0.038335	0.038625	PIK3CA	PIK3CA	26
GNB4	OK	negbinomial.size	2.65984e-86	8.9775e-86	GNB4	GNB4	283
MRPL47	OK	negbinomial.size	2.17428e-25	3.53212e-25	MRPL47	MRPL47	66
NDUFB5	OK	negbinomial.size	3.20874e-22	4.91296e-22	NDUFB5	NDUFB5	169
TTC14	OK	negbinomial.size	6.09062e-21	9.07814e-21	TTC14	TTC14	32
FXR1	OK	negbinomial.size	1.67719e-08	1.91509e-08	FXR1	FXR1	239
DNAJC19	OK	negbinomial.size	7.66414e-16	1.03919e-15	DNAJC19	DNAJC19	17
ATP11B	OK	negbinomial.size	7.71588e-56	1.92066e-55	ATP11B	ATP11B	30
DCUN1D1	OK	negbinomial.size	7.74573e-08	8.71288e-08	DCUN1D1	DCUN1D1	22
LAMP3	OK	negbinomial.size	4.77695e-205	3.4509e-204	LAMP3	LAMP3	52
B3GNT5	OK	negbinomial.size	1.06847e-248	9.4179e-248	B3GNT5	B3GNT5	983
KLHL6	OK	negbinomial.size	9.62357e-12	1.19027e-11	KLHL6	KLHL6	21
KLHL24	OK	negbinomial.size	3.1454e-64	8.58294e-64	KLHL24	KLHL24	134
PARL	OK	negbinomial.size	1.20394e-08	1.37909e-08	PARL	PARL	27
ABCC5	OK	negbinomial.size	1.57424e-118	6.95801e-118	ABCC5	ABCC5	85
AP2M1	OK	negbinomial.size	5.53366e-99	2.07589e-98	AP2M1	AP2M1	2143
ALG3	OK	negbinomial.size	4.39914e-44	9.47912e-44	ALG3	ALG3	19
PSMD2	OK	negbinomial.size	2.40325e-20	3.54242e-20	PSMD2	PSMD2	231
EIF4G1	OK	negbinomial.size	5.59206e-50	1.30255e-49	EIF4G1	EIF4G1	643
POLR2H	OK	negbinomial.size	2.47423e-14	3.2589e-14	POLR2H	POLR2H	37
MAP3K13	OK	negbinomial.size	6.01151e-26	9.87041e-26	MAP3K13	MAP3K13	51
IGF2BP2	OK	negbinomial.size	9.33685e-106	3.7045e-105	IGF2BP2	IGF2BP2	23
TRA2B	OK	negbinomial.size	2.8604e-62	7.65523e-62	TRA2B	TRA2B	4756
ETV5	OK	negbinomial.size	5.39225e-257	5.04319e-256	ETV5	ETV5	168
DNAJB11	OK	negbinomial.size	2.35862e-32	4.28623e-32	DNAJB11	DNAJB11	275
EIF4A2	OK	negbinomial.size	6.91875e-150	3.7343e-149	EIF4A2	EIF4A2	2071
ST6GAL1	OK	negbinomial.size	1.40743e-198	9.88749e-198	ST6GAL1	ST6GAL1	51
BCL6	OK	negbinomial.size	3.72802e-53	8.99836e-53	BCL6	BCL6	282
LPP	OK	negbinomial.size	5.26944e-114	2.2355e-113	LPP	LPP	474
CLDN1	OK	negbinomial.size	0	0	CLDN1	CLDN1	147
IL1RAP	OK	negbinomial.size	2.84143e-152	1.55555e-151	IL1RAP	IL1RAP	75
CCDC50	OK	negbinomial.size	1.45072e-187	9.5766e-187	CCDC50	CCDC50	161
OPA1	OK	negbinomial.size	7.05196e-05	7.42273e-05	OPA1	OPA1	11
HES1	OK	negbinomial.size	1.34302e-14	1.77927e-14	HES1	HES1	374
ATP13A3	OK	negbinomial.size	0	0	ATP13A3	ATP13A3	1938
LSG1	OK	negbinomial.size	2.12627e-07	2.37172e-07	LSG1	LSG1	23
FAM43A	OK	negbinomial.size	5.354e-14	6.9814e-14	FAM43A	FAM43A	18
ACAP2	OK	negbinomial.size	9.19625e-11	1.11007e-10	ACAP2	ACAP2	604
PPP1R2	OK	negbinomial.size	1.61586e-07	1.80799e-07	PPP1R2	PPP1R2	321
APOD	OK	negbinomial.size	0	0	APOD	APOD	480
MUC20-OT1	OK	negbinomial.size	1.43483e-27	2.42275e-27	MUC20-OT1	MUC20-OT1	67
TFRC	OK	negbinomial.size	1.18919e-85	3.99395e-85	TFRC	TFRC	936
PCYT1A	OK	negbinomial.size	1.16568e-08	1.33555e-08	PCYT1A	PCYT1A	41
TM4SF19	OK	negbinomial.size	1.70113e-53	4.11901e-53	TM4SF19	TM4SF19	17
UBXN7	OK	negbinomial.size	5.91268e-07	6.53692e-07	UBXN7	UBXN7	20
RNF168	OK	negbinomial.size	8.00897e-09	9.21889e-09	RNF168	RNF168	56
PAK2	OK	negbinomial.size	3.19866e-28	5.48418e-28	PAK2	PAK2	2161
NCBP2	OK	negbinomial.size	3.51422e-10	4.17536e-10	NCBP2	NCBP2	66
MELTF	OK	negbinomial.size	2.99222e-44	6.46118e-44	MELTF	MELTF	12
DLG1	OK	negbinomial.size	0.0256393	0.0258972	DLG1	DLG1	12
RUBCN	OK	negbinomial.size	1.07302e-14	1.42557e-14	RUBCN	RUBCN	25
FYTTD1	OK	negbinomial.size	1.09526e-12	1.38314e-12	FYTTD1	FYTTD1	140
RPL35A	OK	negbinomial.size	4.47118e-173	2.75835e-172	RPL35A	RPL35A	14879
ZNF141	OK	negbinomial.size	2.85068e-30	5.03119e-30	ZNF141	ZNF141	147
ATP5ME	OK	negbinomial.size	2.59868e-90	9.10206e-90	ATP5ME	ATP5ME	4962
GAK	OK	negbinomial.size	2.33454e-11	2.85799e-11	GAK	GAK	55
SPON2	OK	negbinomial.size	1.80062e-81	5.79338e-81	SPON2	SPON2	26
CTBP1	OK	negbinomial.size	3.89323e-11	4.73683e-11	CTBP1	CTBP1	40
UVSSA	OK	negbinomial.size	1.83709e-13	2.36033e-13	UVSSA	UVSSA	14
SLBP	OK	negbinomial.size	3.14059e-30	5.53169e-30	SLBP	SLBP	59
TACC3	OK	negbinomial.size	5.80091e-115	2.49028e-114	TACC3	TACC3	80
NSD2	OK	negbinomial.size	4.35485e-77	1.34194e-76	NSD2	NSD2	24
C4orf48	OK	negbinomial.size	1.13702e-176	7.17338e-176	C4orf48	C4orf48	1617
MXD4	OK	negbinomial.size	4.78452e-80	1.51708e-79	MXD4	MXD4	272
RNF4	OK	negbinomial.size	0.00026205	0.00027306	RNF4	RNF4	12
TNIP2	OK	negbinomial.size	2.95586e-36	5.67102e-36	TNIP2	TNIP2	58
SH3BP2	OK	negbinomial.size	1.19728e-37	2.35761e-37	SH3BP2	SH3BP2	292
ADD1	OK	negbinomial.size	3.96239e-12	4.94068e-12	ADD1	ADD1	116
MFSD10	OK	negbinomial.size	1.08389e-14	1.4394e-14	MFSD10	MFSD10	88
NOP14	OK	negbinomial.size	7.06452e-45	1.54176e-44	NOP14	NOP14	40
HTT	OK	negbinomial.size	3.38326e-11	4.12209e-11	HTT	HTT	27
RGS12	OK	negbinomial.size	4.01404e-10	4.76089e-10	RGS12	RGS12	18
LRPAP1	OK	negbinomial.size	5.64269e-15	7.54247e-15	LRPAP1	LRPAP1	615
LYAR	OK	negbinomial.size	1.03135e-40	2.12157e-40	LYAR	LYAR	84
MSX1	OK	negbinomial.size	5.33135e-49	1.22597e-48	MSX1	MSX1	11
MRFAP1	OK	negbinomial.size	2.67119e-13	3.41836e-13	MRFAP1	MRFAP1	406
S100P	OK	negbinomial.size	2.66251e-188	1.7633e-187	S100P	S100P	15
KIAA0232	OK	negbinomial.size	8.46516e-11	1.02324e-10	KIAA0232	KIAA0232	20
TBC1D14	OK	negbinomial.size	8.48464e-48	1.91938e-47	TBC1D14	TBC1D14	79
GRPEL1	OK	negbinomial.size	8.43944e-15	1.12343e-14	GRPEL1	GRPEL1	47
SH3TC1	OK	negbinomial.size	2.24542e-36	4.3134e-36	SH3TC1	SH3TC1	49
HTRA3	OK	negbinomial.size	3.40076e-188	2.24979e-187	HTRA3	HTRA3	60
WDR1	OK	negbinomial.size	1.88042e-113	7.94444e-113	WDR1	WDR1	1484
HS3ST1	OK	negbinomial.size	1.84246e-159	1.04703e-158	HS3ST1	HS3ST1	115
BOD1L1	OK	negbinomial.size	3.50542e-10	4.1657e-10	BOD1L1	BOD1L1	800
CPEB2	OK	negbinomial.size	2.01113e-20	2.968e-20	CPEB2	CPEB2	94
FBXL5	OK	negbinomial.size	4.45907e-78	1.38521e-77	FBXL5	FBXL5	103
FAM200B	OK	negbinomial.size	4.88745e-39	9.81335e-39	FAM200B	FAM200B	36
BST1	OK	negbinomial.size	1.55566e-148	8.31586e-148	BST1	BST1	50
CD38	OK	negbinomial.size	2.38774e-83	7.86836e-83	CD38	CD38	44
LAP3	OK	negbinomial.size	8.37559411873805e-310	0	LAP3	LAP3	1492
MED28	OK	negbinomial.size	0.00134915	0.00138929	MED28	MED28	30
NCAPG	OK	negbinomial.size	1.43221e-217	1.0872e-216	NCAPG	NCAPG	26
LCORL	OK	negbinomial.size	5.33827e-11	6.48212e-11	LCORL	LCORL	28
SLIT2	OK	negbinomial.size	5.04203e-120	2.24963e-119	SLIT2	SLIT2	14
DHX15	OK	negbinomial.size	2.72615e-29	4.73502e-29	DHX15	DHX15	73
SOD3	OK	negbinomial.size	6.9571e-297	7.42495e-296	SOD3	SOD3	109
LGI2	OK	negbinomial.size	2.15333e-122	9.78585e-122	LGI2	LGI2	13
SEL1L3	OK	negbinomial.size	3.11331e-63	8.41294e-63	SEL1L3	SEL1L3	20
SMIM20	OK	negbinomial.size	2.45179e-24	3.91036e-24	SMIM20	SMIM20	11
RBPJ	OK	negbinomial.size	0	0	RBPJ	RBPJ	4060
STIM2	OK	negbinomial.size	4.67487e-08	5.28869e-08	STIM2	STIM2	11
PCDH7	OK	negbinomial.size	1.7032e-43	3.64181e-43	PCDH7	PCDH7	12
ARAP2	OK	negbinomial.size	7.31508e-27	1.21838e-26	ARAP2	ARAP2	47
RELL1	OK	negbinomial.size	2.54583e-48	5.802e-48	RELL1	RELL1	21
TBC1D1	OK	negbinomial.size	4.35543e-16	5.9292e-16	TBC1D1	TBC1D1	108
KLF3	OK	negbinomial.size	2.29772e-30	4.06582e-30	KLF3	KLF3	496
TLR1	OK	negbinomial.size	3.73405e-49	8.62549e-49	TLR1	TLR1	114
TLR6	OK	negbinomial.size	2.54528e-11	3.11287e-11	TLR6	TLR6	17
FAM114A1	OK	negbinomial.size	2.13015e-85	7.13466e-85	FAM114A1	FAM114A1	28
KLHL5	OK	negbinomial.size	4.86169e-24	7.70774e-24	KLHL5	KLHL5	22
RFC1	OK	negbinomial.size	2.78799e-65	7.70724e-65	RFC1	RFC1	79
RPL9	OK	negbinomial.size	1.4669e-63	3.98327e-63	RPL9	RPL9	15282
UGDH	OK	negbinomial.size	1.92747e-47	4.34425e-47	UGDH	UGDH	24
SMIM14	OK	negbinomial.size	8.32126e-46	1.83367e-45	SMIM14	SMIM14	91
UBE2K	OK	negbinomial.size	1.72546e-14	2.27952e-14	UBE2K	UBE2K	278
PDS5A	OK	negbinomial.size	3.91095e-10	4.64132e-10	PDS5A	PDS5A	70
N4BP2	OK	negbinomial.size	4.86889e-19	7.01313e-19	N4BP2	N4BP2	106
RHOH	OK	negbinomial.size	1.92043e-100	7.28006e-100	RHOH	RHOH	70
RBM47	OK	negbinomial.size	3.20019e-101	1.22374e-100	RBM47	RBM47	1193
UCHL1	OK	negbinomial.size	9.02421e-22	1.36601e-21	UCHL1	UCHL1	15
LIMCH1	OK	negbinomial.size	3.24702e-62	8.67856e-62	LIMCH1	LIMCH1	17
TMEM33	OK	negbinomial.size	1.07522e-21	1.62516e-21	TMEM33	TMEM33	105
COMMD8	OK	negbinomial.size	3.58678e-15	4.80906e-15	COMMD8	COMMD8	47
NFXL1	OK	negbinomial.size	9.28383e-18	1.3071e-17	NFXL1	NFXL1	34
SLAIN2	OK	negbinomial.size	8.54918e-17	1.18142e-16	SLAIN2	SLAIN2	71
FRYL	OK	negbinomial.size	0.0489806	0.0492782	FRYL	FRYL	34
OCIAD1	OK	negbinomial.size	3.83239e-11	4.66466e-11	OCIAD1	OCIAD1	286
DANCR	OK	negbinomial.size	2.56107e-47	5.75748e-47	DANCR	DANCR	37
CHIC2	OK	negbinomial.size	2.88767e-72	8.48841e-72	CHIC2	CHIC2	11
PDGFRA	OK	negbinomial.size	7.85612e-249	6.93467e-248	PDGFRA	PDGFRA	70
KIT	OK	negbinomial.size	2.18878e-184	1.42795e-183	KIT	KIT	31
TMEM165	OK	negbinomial.size	6.29933e-12	7.82594e-12	TMEM165	TMEM165	738
CLOCK	OK	negbinomial.size	5.92582e-36	1.13407e-35	CLOCK	CLOCK	14
EXOC1	OK	negbinomial.size	3.78528e-08	4.28864e-08	EXOC1	EXOC1	53
CEP135	OK	negbinomial.size	0.00997726	0.010121	CEP135	CEP135	27
PAICS	OK	negbinomial.size	4.15226e-78	1.29121e-77	PAICS	PAICS	41
SRP72	OK	negbinomial.size	2.77372e-30	4.89677e-30	SRP72	SRP72	502
HOPX	OK	negbinomial.size	1.3986e-85	4.69471e-85	HOPX	HOPX	17
REST	OK	negbinomial.size	0.0067605	0.00687269	REST	REST	140
POLR2B	OK	negbinomial.size	3.63554e-07	4.03538e-07	POLR2B	POLR2B	41
IGFBP7	OK	negbinomial.size	0	0	IGFBP7	IGFBP7	1043
CENPC	OK	negbinomial.size	4.40286e-21	6.58494e-21	CENPC	CENPC	41
UBA6	OK	negbinomial.size	4.86763e-05	5.15545e-05	UBA6	UBA6	37
YTHDC1	OK	negbinomial.size	5.33452e-05	5.64214e-05	YTHDC1	YTHDC1	224
JCHAIN	OK	negbinomial.size	7.89113991520128e-317	8.96866848238015e-316	JCHAIN	JCHAIN	64
UTP3	OK	negbinomial.size	1.97397e-05	2.10525e-05	UTP3	UTP3	23
RUFY3	OK	negbinomial.size	2.26025e-55	5.58545e-55	RUFY3	RUFY3	77
GRSF1	OK	negbinomial.size	2.13556e-11	2.61597e-11	GRSF1	GRSF1	55
MOB1B	OK	negbinomial.size	1.11841e-62	3.00763e-62	MOB1B	MOB1B	38
DCK	OK	negbinomial.size	6.63497e-90	2.31468e-89	DCK	DCK	42
ANKRD17	OK	negbinomial.size	3.13076e-06	3.39512e-06	ANKRD17	ANKRD17	79
CXCL8	OK	negbinomial.size	0	0	CXCL8	CXCL8	7922
CXCL6	OK	negbinomial.size	1.85548e-25	3.01904e-25	CXCL6	CXCL6	14
PF4V1	OK	negbinomial.size	2.06383e-13	2.6472e-13	PF4V1	PF4V1	11
CXCL1	OK	negbinomial.size	5.18852e-239	4.30689e-238	CXCL1	CXCL1	669
PPBP	OK	negbinomial.size	0	0	PPBP	PPBP	396
CXCL5	OK	negbinomial.size	0	0	CXCL5	CXCL5	882
CXCL3	OK	negbinomial.size	0	0	CXCL3	CXCL3	5350
CXCL2	OK	negbinomial.size	0	0	CXCL2	CXCL2	5789
MTHFD2L	OK	negbinomial.size	5.81665e-24	9.20268e-24	MTHFD2L	MTHFD2L	12
EREG	OK	negbinomial.size	0	0	EREG	EREG	5463
AREG	OK	negbinomial.size	0	0	AREG	AREG	2490
G3BP2	OK	negbinomial.size	3.95261e-06	4.27728e-06	G3BP2	G3BP2	280
USO1	OK	negbinomial.size	5.36958e-21	8.01316e-21	USO1	USO1	87
NAAA	OK	negbinomial.size	2.00108e-46	4.44797e-46	NAAA	NAAA	39
SDAD1	OK	negbinomial.size	8.54885e-19	1.2259e-18	SDAD1	SDAD1	19
CXCL9	OK	negbinomial.size	0	0	CXCL9	CXCL9	146
CXCL10	OK	negbinomial.size	0	0	CXCL10	CXCL10	441
CXCL11	OK	negbinomial.size	0	0	CXCL11	CXCL11	216
SCARB2	OK	negbinomial.size	1.57447e-240	1.32489e-239	SCARB2	SCARB2	1637
2023-09-11	OK	negbinomial.size	6.33191e-255	5.81548e-254	2023-09-11	2023-09-11	188
CCNI	OK	negbinomial.size	4.95397e-91	1.74514e-90	CCNI	CCNI	5550
CCNG2	OK	negbinomial.size	8.26835e-26	1.35469e-25	CCNG2	CCNG2	40
CNOT6L	OK	negbinomial.size	5.70322e-08	6.43424e-08	CNOT6L	CNOT6L	96
MRPL1	OK	negbinomial.size	4.08504e-31	7.30016e-31	MRPL1	MRPL1	20
LINC01094	OK	negbinomial.size	2.53769e-144	1.31968e-143	LINC01094	LINC01094	154
AC098818.2	OK	negbinomial.size	3.1407e-23	4.90064e-23	AC098818.2	AC098818.2	13
BMP2K	OK	negbinomial.size	6.88539e-126	3.18339e-125	BMP2K	BMP2K	617
ANTXR2	OK	negbinomial.size	4.75438e-26	7.81679e-26	ANTXR2	ANTXR2	63
PRDM8	OK	negbinomial.size	2.13016e-46	4.73318e-46	PRDM8	PRDM8	37
RASGEF1B	OK	negbinomial.size	7.75404e-102	2.98188e-101	RASGEF1B	RASGEF1B	1783
HNRNPD	OK	negbinomial.size	3.16003e-57	7.99931e-57	HNRNPD	HNRNPD	1709
HNRNPDL	OK	negbinomial.size	7.59988e-56	1.89256e-55	HNRNPDL	HNRNPDL	5462
SEC31A	OK	negbinomial.size	3.22453e-27	5.41191e-27	SEC31A	SEC31A	377
THAP9-AS1	OK	negbinomial.size	2.25617e-10	2.69237e-10	THAP9-AS1	THAP9-AS1	26
PLAC8	OK	negbinomial.size	0	0	PLAC8	PLAC8	209
HPSE	OK	negbinomial.size	2.54262e-235	2.08515e-234	HPSE	HPSE	138
MRPS18C	OK	negbinomial.size	8.71773e-15	1.15997e-14	MRPS18C	MRPS18C	121
GPAT3	OK	negbinomial.size	6.37401e-196	4.40713e-195	GPAT3	GPAT3	96
WDFY3	OK	negbinomial.size	4.79216e-37	9.3137e-37	WDFY3	WDFY3	82
ARHGAP24	OK	negbinomial.size	5.68951e-24	9.00386e-24	ARHGAP24	ARHGAP24	16
AFF1	OK	negbinomial.size	2.16899e-45	4.76246e-45	AFF1	AFF1	85
KLHL8	OK	negbinomial.size	9.38566e-15	1.2483e-14	KLHL8	KLHL8	20
HSD17B11	OK	negbinomial.size	2.77759e-25	4.50623e-25	HSD17B11	HSD17B11	307
SPARCL1	OK	negbinomial.size	0	0	SPARCL1	SPARCL1	858
AC093895.1	OK	negbinomial.size	2.6427e-179	1.68462e-178	AC093895.1	AC093895.1	94
IBSP	OK	negbinomial.size	0	0	IBSP	IBSP	369
SPP1	OK	negbinomial.size	0	0	SPP1	SPP1	7502
PKD2	OK	negbinomial.size	5.75086e-15	7.6837e-15	PKD2	PKD2	10
PPM1K	OK	negbinomial.size	4.22844e-61	1.11991e-60	PPM1K	PPM1K	119
HERC5	OK	negbinomial.size	1.53919e-277	1.54575e-276	HERC5	HERC5	206
PYURF	OK	negbinomial.size	9.32867e-13	1.17976e-12	PYURF	PYURF	112
FAM13A	OK	negbinomial.size	1.2109e-121	5.46644e-121	FAM13A	FAM13A	231
GPRIN3	OK	negbinomial.size	1.39937e-138	7.03819e-138	GPRIN3	GPRIN3	545
SNCA	OK	negbinomial.size	9.0148e-39	1.80473e-38	SNCA	SNCA	21
HPGDS	OK	negbinomial.size	0	0	HPGDS	HPGDS	115
PDLIM5	OK	negbinomial.size	7.35496e-19	1.05618e-18	PDLIM5	PDLIM5	76
EIF4E	OK	negbinomial.size	7.3302e-184	4.76191e-183	EIF4E	EIF4E	1870
ADH5	OK	negbinomial.size	6.29543e-91	2.21643e-90	ADH5	ADH5	69
ADH1B	OK	negbinomial.size	0	0	ADH1B	ADH1B	242
DAPP1	OK	negbinomial.size	8.76003e-82	2.83187e-81	DAPP1	DAPP1	109
LAMTOR3	OK	negbinomial.size	3.67819e-08	4.16807e-08	LAMTOR3	LAMTOR3	32
DNAJB14	OK	negbinomial.size	6.44631e-19	9.26127e-19	DNAJB14	DNAJB14	111
H2AFZ	OK	negbinomial.size	0	0	H2AFZ	H2AFZ	3292
PPP3CA	OK	negbinomial.size	3.57433e-11	4.35315e-11	PPP3CA	PPP3CA	131
SLC39A8	OK	negbinomial.size	0	0	SLC39A8	SLC39A8	2030
NFKB1	OK	negbinomial.size	2.02654e-110	8.36562e-110	NFKB1	NFKB1	708
MANBA	OK	negbinomial.size	4.77563e-59	1.2365e-58	MANBA	MANBA	185
UBE2D3	OK	negbinomial.size	1.35117e-96	4.96239e-96	UBE2D3	UBE2D3	6862
CISD2	OK	negbinomial.size	1.0944e-38	2.18881e-38	CISD2	CISD2	163
CENPE	OK	negbinomial.size	3.99488e-180	2.55722e-179	CENPE	CENPE	77
TET2	OK	negbinomial.size	6.64639e-246	5.75895e-245	TET2	TET2	1024
AIMP1	OK	negbinomial.size	1.88289e-18	2.68371e-18	AIMP1	AIMP1	214
PAPSS1	OK	negbinomial.size	1.15934e-36	2.23617e-36	PAPSS1	PAPSS1	168
SGMS2	OK	negbinomial.size	4.46074e-79	1.4028e-78	SGMS2	SGMS2	90
RPL34	OK	negbinomial.size	4.43066e-253	4.00327e-252	RPL34	RPL34	17708
OSTC	OK	negbinomial.size	4.02009e-30	7.07066e-30	OSTC	OSTC	614
MCUB	OK	negbinomial.size	2.14013e-160	1.22642e-159	MCUB	MCUB	521
FAM241A	OK	negbinomial.size	1.99838e-08	2.27675e-08	FAM241A	FAM241A	31
TIFA	OK	negbinomial.size	1.74594e-32	3.18134e-32	TIFA	TIFA	14
LARP7	OK	negbinomial.size	1.71278e-18	2.44353e-18	LARP7	LARP7	321
CAMK2D	OK	negbinomial.size	4.97455e-27	8.32171e-27	CAMK2D	CAMK2D	112
SNHG8	OK	negbinomial.size	3.50967e-37	6.84068e-37	SNHG8	SNHG8	994
SEC24D	OK	negbinomial.size	9.63745e-20	1.40804e-19	SEC24D	SEC24D	75
SYNPO2	OK	negbinomial.size	5.55047e-65	1.5275e-64	SYNPO2	SYNPO2	62
MYOZ2	OK	negbinomial.size	1.31235e-27	2.21717e-27	MYOZ2	MYOZ2	11
USP53	OK	negbinomial.size	0	0	USP53	USP53	920
C4orf3	OK	negbinomial.size	6.5485e-74	1.95879e-73	C4orf3	C4orf3	1425
PDE5A	OK	negbinomial.size	1.46979e-76	4.51325e-76	PDE5A	PDE5A	10
MAD2L1	OK	negbinomial.size	3.72487e-156	2.09345e-155	MAD2L1	MAD2L1	21
ANXA5	OK	negbinomial.size	2.75437e-299	2.98642e-298	ANXA5	ANXA5	10969
CCNA2	OK	negbinomial.size	1.49219e-174	9.28979e-174	CCNA2	CCNA2	28
KIAA1109	OK	negbinomial.size	6.59816e-28	1.12247e-27	KIAA1109	KIAA1109	39
SPRY1	OK	negbinomial.size	1.62013e-152	8.87738e-152	SPRY1	SPRY1	88
ANKRD50	OK	negbinomial.size	1.57813e-06	1.72543e-06	ANKRD50	ANKRD50	10
LARP1B	OK	negbinomial.size	0.000116411	0.000122174	LARP1B	LARP1B	17
PGRMC2	OK	negbinomial.size	2.97041e-25	4.81396e-25	PGRMC2	PGRMC2	11
AC078850.1	OK	negbinomial.size	1.87733e-225	1.47443e-224	AC078850.1	AC078850.1	157
JADE1	OK	negbinomial.size	1.1404e-24	1.82834e-24	JADE1	JADE1	57
SCLT1	OK	negbinomial.size	3.83186e-19	5.5311e-19	SCLT1	SCLT1	23
SLC7A11	OK	negbinomial.size	1.69649e-54	4.15045e-54	SLC7A11	SLC7A11	45
ELF2	OK	negbinomial.size	2.11675e-22	3.24912e-22	ELF2	ELF2	121
NDUFC1	OK	negbinomial.size	1.085e-11	1.34006e-11	NDUFC1	NDUFC1	382
NAA15	OK	negbinomial.size	1.17558e-14	1.55946e-14	NAA15	NAA15	27
SETD7	OK	negbinomial.size	2.43885e-14	3.21368e-14	SETD7	SETD7	15
MGST2	OK	negbinomial.size	3.10868e-24	4.94514e-24	MGST2	MGST2	114
MAML3	OK	negbinomial.size	3.54389e-43	7.54338e-43	MAML3	MAML3	16
TBC1D9	OK	negbinomial.size	4.94986e-48	1.12265e-47	TBC1D9	TBC1D9	72
ZNF330	OK	negbinomial.size	1.27712e-12	1.6098e-12	ZNF330	ZNF330	70
INPP4B	OK	negbinomial.size	1.18232e-38	2.36078e-38	INPP4B	INPP4B	12
USP38	OK	negbinomial.size	2.30745e-09	2.68887e-09	USP38	USP38	36
SMARCA5	OK	negbinomial.size	5.90161e-05	6.2226e-05	SMARCA5	SMARCA5	514
ABCE1	OK	negbinomial.size	6.15919e-66	1.71428e-65	ABCE1	ABCE1	98
OTUD4	OK	negbinomial.size	8.06792e-12	9.99678e-12	OTUD4	OTUD4	21
LSM6	OK	negbinomial.size	2.4489e-19	3.55076e-19	LSM6	LSM6	50
PRMT9	OK	negbinomial.size	3.10904e-60	8.14627e-60	PRMT9	PRMT9	262
ARHGAP10	OK	negbinomial.size	5.07936e-47	1.13563e-46	ARHGAP10	ARHGAP10	82
RPS3A	OK	negbinomial.size	1.25602e-240	1.05837e-239	RPS3A	RPS3A	14005
FBXW7	OK	negbinomial.size	1.14372e-16	1.57484e-16	FBXW7	FBXW7	44
AC106865.1	OK	negbinomial.size	6.74614e-28	1.14733e-27	AC106865.1	AC106865.1	28
TLR2	OK	negbinomial.size	3.41043e-232	2.77086e-231	TLR2	TLR2	1509
SFRP2	OK	negbinomial.size	0	0	SFRP2	SFRP2	231
GUCY1A1	OK	negbinomial.size	1.42642e-53	3.45658e-53	GUCY1A1	GUCY1A1	15
TDO2	OK	negbinomial.size	1.35486e-44	2.9474e-44	TDO2	TDO2	16
PDGFC	OK	negbinomial.size	6.00985e-216	4.50628e-215	PDGFC	PDGFC	48
GASK1B	OK	negbinomial.size	7.07211e-56	1.76185e-55	GASK1B	GASK1B	303
TMEM144	OK	negbinomial.size	3.82185e-05	4.05765e-05	TMEM144	TMEM144	12
PPID	OK	negbinomial.size	1.62041e-07	1.81275e-07	PPID	PPID	43
FNIP2	OK	negbinomial.size	6.58364e-176	4.1408e-175	FNIP2	FNIP2	1642
RAPGEF2	OK	negbinomial.size	9.55024e-33	1.74693e-32	RAPGEF2	RAPGEF2	65
NAF1	OK	negbinomial.size	5.82432e-12	7.24169e-12	NAF1	NAF1	42
TMA16	OK	negbinomial.size	1.12265e-20	1.66563e-20	TMA16	TMA16	27
2023-03-01	OK	negbinomial.size	1.99618e-129	9.45025e-129	2023-03-01	2023-03-01	1198
TMEM192	OK	negbinomial.size	5.8476e-39	1.1722e-38	TMEM192	TMEM192	28
KLHL2	OK	negbinomial.size	1.33332e-25	2.17521e-25	KLHL2	KLHL2	16
MSMO1	OK	negbinomial.size	4.14643e-16	5.64844e-16	MSMO1	MSMO1	13
CPE	OK	negbinomial.size	7.31357470488464e-318	8.32768742668498e-317	CPE	CPE	145
DDX60	OK	negbinomial.size	2.38988e-52	5.71891e-52	DDX60	DDX60	21
DDX60L	OK	negbinomial.size	5.92826e-266	5.66561e-265	DDX60L	DDX60L	821
PALLD	OK	negbinomial.size	1.25907e-126	5.84321e-126	PALLD	PALLD	145
CLCN3	OK	negbinomial.size	0.229838	0.230403	CLCN3	CLCN3	43
HPF1	OK	negbinomial.size	1.68927e-25	2.75224e-25	HPF1	HPF1	12
HMGB2	OK	negbinomial.size	0	0	HMGB2	HMGB2	2389
AC097534.2	OK	negbinomial.size	1.08239e-27	1.8327e-27	AC097534.2	AC097534.2	10
SAP30	OK	negbinomial.size	0	0	SAP30	SAP30	2659
SCRG1	OK	negbinomial.size	4.70372e-28	8.03317e-28	SCRG1	SCRG1	16
HPGD	OK	negbinomial.size	3.56225e-268	3.44201e-267	HPGD	HPGD	133
SPCS3	OK	negbinomial.size	1.76381e-59	4.58622e-59	SPCS3	SPCS3	1754
CDKN2AIP	OK	negbinomial.size	3.99725e-54	9.75974e-54	CDKN2AIP	CDKN2AIP	74
ING2	OK	negbinomial.size	1.16786e-41	2.43344e-41	ING2	ING2	141
IRF2	OK	negbinomial.size	4.17074e-12	5.19625e-12	IRF2	IRF2	61
CASP3	OK	negbinomial.size	4.53614e-13	5.77722e-13	CASP3	CASP3	93
CENPU	OK	negbinomial.size	3.97281e-65	1.09431e-64	CENPU	CENPU	33
ACSL1	OK	negbinomial.size	0	0	ACSL1	ACSL1	2613
AC084871.2	OK	negbinomial.size	9.28585e-18	1.3071e-17	AC084871.2	AC084871.2	10
MIR3945HG	OK	negbinomial.size	1.15221e-90	4.04496e-90	MIR3945HG	MIR3945HG	119
CFAP97	OK	negbinomial.size	2.90782e-75	8.83597e-75	CFAP97	CFAP97	41
ANKRD37	OK	negbinomial.size	4.4238e-26	7.27717e-26	ANKRD37	ANKRD37	68
PDLIM3	OK	negbinomial.size	1.95466e-45	4.29493e-45	PDLIM3	PDLIM3	17
SORBS2	OK	negbinomial.size	1.1995e-41	2.49767e-41	SORBS2	SORBS2	13
FAT1	OK	negbinomial.size	5.87408e-54	1.43023e-53	FAT1	FAT1	10
FRG1	OK	negbinomial.size	8.31867e-06	8.93098e-06	FRG1	FRG1	37
EXOC3	OK	negbinomial.size	5.07935e-07	5.62373e-07	EXOC3	EXOC3	11
BRD9	OK	negbinomial.size	3.52786e-16	4.80901e-16	BRD9	BRD9	30
SLC12A7	OK	negbinomial.size	1.30499e-22	2.0137e-22	SLC12A7	SLC12A7	21
CLPTM1L	OK	negbinomial.size	1.41229e-13	1.82026e-13	CLPTM1L	CLPTM1L	34
LPCAT1	OK	negbinomial.size	1.73534e-145	9.14863e-145	LPCAT1	LPCAT1	109
MRPL36	OK	negbinomial.size	5.6923e-14	7.41305e-14	MRPL36	MRPL36	21
NDUFS6	OK	negbinomial.size	1.86921e-82	6.09407e-82	NDUFS6	NDUFS6	2132
ICE1	OK	negbinomial.size	5.48649e-06	5.92147e-06	ICE1	ICE1	19
MED10	OK	negbinomial.size	1.58597e-13	2.04239e-13	MED10	MED10	51
CCT5	OK	negbinomial.size	1.26843e-148	6.79229e-148	CCT5	CCT5	1373
2023-03-06	OK	negbinomial.size	0.000292047	0.000304059	2023-03-06	2023-03-06	57
DAP	OK	negbinomial.size	0.013131	0.0133091	DAP	DAP	46
TRIO	OK	negbinomial.size	1.78205e-22	2.74154e-22	TRIO	TRIO	15
OTULINL	OK	negbinomial.size	9.90961e-21	1.47131e-20	OTULINL	OTULINL	112
OTULIN	OK	negbinomial.size	1.52e-12	1.91241e-12	OTULIN	OTULIN	28
ANKH	OK	negbinomial.size	1.61531e-206	1.17105e-205	ANKH	ANKH	427
ZNF622	OK	negbinomial.size	2.31665e-06	2.52119e-06	ZNF622	ZNF622	40
BASP1	OK	negbinomial.size	0	0	BASP1	BASP1	2080
GOLPH3	OK	negbinomial.size	0.000225955	0.000235729	GOLPH3	GOLPH3	18
ZFR	OK	negbinomial.size	5.75803e-09	6.65165e-09	ZFR	ZFR	122
SUB1	OK	negbinomial.size	9.19464e-162	5.31882e-161	SUB1	SUB1	3458
TARS	OK	negbinomial.size	9.77237e-20	1.42741e-19	TARS	TARS	44
RAI14	OK	negbinomial.size	3.78729e-48	8.60888e-48	RAI14	RAI14	37
BRIX1	OK	negbinomial.size	3.8152e-27	6.38926e-27	BRIX1	BRIX1	19
DNAJC21	OK	negbinomial.size	2.26315e-10	2.69938e-10	DNAJC21	DNAJC21	146
IL7R	OK	negbinomial.size	0	0	IL7R	IL7R	644
SLC1A3	OK	negbinomial.size	0	0	SLC1A3	SLC1A3	1391
AC008957.3	OK	negbinomial.size	7.40316e-52	1.7585e-51	AC008957.3	AC008957.3	10
NIPBL	OK	negbinomial.size	0.000526239	0.000545564	NIPBL	NIPBL	828
WDR70	OK	negbinomial.size	2.15274e-10	2.5712e-10	WDR70	WDR70	11
LIFR	OK	negbinomial.size	6.26354e-95	2.27853e-94	LIFR	LIFR	31
RICTOR	OK	negbinomial.size	2.07472e-10	2.48217e-10	RICTOR	RICTOR	26
FYB1	OK	negbinomial.size	2.07134e-194	1.42094e-193	FYB1	FYB1	5666
DAB2	OK	negbinomial.size	0	0	DAB2	DAB2	5262
PTGER4	OK	negbinomial.size	1.46745e-148	7.85115e-148	PTGER4	PTGER4	700
RPL37	OK	negbinomial.size	3.72232e-179	2.37037e-178	RPL37	RPL37	18268
C7	OK	negbinomial.size	0	0	C7	C7	236
SELENOP	OK	negbinomial.size	0	0	SELENOP	SELENOP	4170
ZNF131	OK	negbinomial.size	0.0397667	0.0400544	ZNF131	ZNF131	36
HMGCS1	OK	negbinomial.size	8.91356e-06	9.56128e-06	HMGCS1	HMGCS1	40
EMB	OK	negbinomial.size	5.49521e-294	5.77421e-293	EMB	EMB	549
PARP8	OK	negbinomial.size	7.97289e-12	9.88303e-12	PARP8	PARP8	21
ITGA1	OK	negbinomial.size	1.13709e-56	2.85952e-56	ITGA1	ITGA1	15
MOCS2	OK	negbinomial.size	8.75909e-40	1.77853e-39	MOCS2	MOCS2	17
FST	OK	negbinomial.size	1.25725e-135	6.19125e-135	FST	FST	27
NDUFS4	OK	negbinomial.size	3.86236e-14	5.05464e-14	NDUFS4	NDUFS4	77
SNX18	OK	negbinomial.size	5.99549e-22	9.11147e-22	SNX18	SNX18	115
GZMK	OK	negbinomial.size	8.99031e-63	2.42193e-62	GZMK	GZMK	29
GZMA	OK	negbinomial.size	0	0	GZMA	GZMA	91
DHX29	OK	negbinomial.size	1.01351e-13	1.3107e-13	DHX29	DHX29	77
MTREX	OK	negbinomial.size	4.29851e-11	5.22577e-11	MTREX	MTREX	10
IL6ST	OK	negbinomial.size	6.41694e-136	3.17017e-135	IL6ST	IL6ST	392
MAP3K1	OK	negbinomial.size	1.29797e-25	2.11867e-25	MAP3K1	MAP3K1	158
GPBP1	OK	negbinomial.size	9.88314e-27	1.63943e-26	GPBP1	GPBP1	1023
PLK2	OK	negbinomial.size	1.38083e-44	3.00283e-44	PLK2	PLK2	236
GAPT	OK	negbinomial.size	2.9336e-83	9.65677e-83	GAPT	GAPT	57
PDE4D	OK	negbinomial.size	4.43222e-160	2.5281e-159	PDE4D	PDE4D	63
NDUFAF2	OK	negbinomial.size	3.8067e-34	7.12057e-34	NDUFAF2	NDUFAF2	40
SMIM15	OK	negbinomial.size	4.47732e-25	7.23504e-25	SMIM15	SMIM15	63
ZSWIM6	OK	negbinomial.size	3.82749e-38	7.58072e-38	ZSWIM6	ZSWIM6	144
AC122718.1	OK	negbinomial.size	5.81744e-44	1.25132e-43	AC122718.1	AC122718.1	33
KIF2A	OK	negbinomial.size	3.11224e-59	8.07865e-59	KIF2A	KIF2A	32
SREK1IP1	OK	negbinomial.size	0.0153076	0.0154999	SREK1IP1	SREK1IP1	102
CENPK	OK	negbinomial.size	4.23416e-152	2.31387e-151	CENPK	CENPK	25
SGTB	OK	negbinomial.size	9.2751e-23	1.43556e-22	SGTB	SGTB	103
NLN	OK	negbinomial.size	1.4583e-63	3.96167e-63	NLN	NLN	36
ERBIN	OK	negbinomial.size	4.15897e-12	5.18263e-12	ERBIN	ERBIN	278
SREK1	OK	negbinomial.size	4.10233e-18	5.82003e-18	SREK1	SREK1	153
CD180	OK	negbinomial.size	3.63745e-84	1.2071e-83	CD180	CD180	62
PIK3R1	OK	negbinomial.size	9.55768e-116	4.13491e-115	PIK3R1	PIK3R1	1124
CCNB1	OK	negbinomial.size	1.22085e-229	9.80204e-229	CCNB1	CCNB1	60
MRPS36	OK	negbinomial.size	0.00450737	0.00459284	MRPS36	MRPS36	75
AK6	OK	negbinomial.size	5.86051e-07	6.48042e-07	AK6	AK6	13
TAF9	OK	negbinomial.size	1.65325e-24	2.64226e-24	TAF9	TAF9	97
NAIP	OK	negbinomial.size	1.19737e-76	3.68226e-76	NAIP	NAIP	95
BDP1	OK	negbinomial.size	5.51535e-20	8.0869e-20	BDP1	BDP1	346
MAP1B	OK	negbinomial.size	0	0	MAP1B	MAP1B	157
TNPO1	OK	negbinomial.size	1.31483e-23	2.06635e-23	TNPO1	TNPO1	125
FCHO2	OK	negbinomial.size	2.21264e-188	1.46854e-187	FCHO2	FCHO2	327
BTF3	OK	negbinomial.size	3.51105e-42	7.37863e-42	BTF3	BTF3	7963
ENC1	OK	negbinomial.size	1.38259e-23	2.17174e-23	ENC1	ENC1	128
HEXB	OK	negbinomial.size	7.38086e-55	1.81296e-54	HEXB	HEXB	696
NSA2	OK	negbinomial.size	1.91515e-06	2.09018e-06	NSA2	NSA2	2160
COL4A3BP	OK	negbinomial.size	2.16967e-16	2.9728e-16	COL4A3BP	COL4A3BP	188
POLK	OK	negbinomial.size	1.07437e-08	1.23228e-08	POLK	POLK	42
IQGAP2	OK	negbinomial.size	0	0	IQGAP2	IQGAP2	1265
TBCA	OK	negbinomial.size	3.38645e-10	4.0251e-10	TBCA	TBCA	1778
AP3B1	OK	negbinomial.size	2.63077e-07	2.92807e-07	AP3B1	AP3B1	109
SCAMP1	OK	negbinomial.size	2.40427e-11	2.94218e-11	SCAMP1	SCAMP1	17
LHFPL2	OK	negbinomial.size	0	0	LHFPL2	LHFPL2	1610
JMY	OK	negbinomial.size	1.64563e-35	3.12787e-35	JMY	JMY	199
HOMER1	OK	negbinomial.size	1.24828e-07	1.39849e-07	HOMER1	HOMER1	21
TENT2	OK	negbinomial.size	7.85032e-35	1.48201e-34	TENT2	TENT2	55
SERINC5	OK	negbinomial.size	8.58412e-07	9.45797e-07	SERINC5	SERINC5	40
ZFYVE16	OK	negbinomial.size	1.04239e-56	2.62245e-56	ZFYVE16	ZFYVE16	1129
DHFR	OK	negbinomial.size	5.04676e-139	2.54247e-138	DHFR	DHFR	59
MSH3	OK	negbinomial.size	4.13381e-05	4.38506e-05	MSH3	MSH3	11
SSBP2	OK	negbinomial.size	3.78384e-34	7.07996e-34	SSBP2	SSBP2	19
RPS23	OK	negbinomial.size	7.51892e-218	5.72185e-217	RPS23	RPS23	16514
TMEM167A	OK	negbinomial.size	7.35426e-152	4.01535e-151	TMEM167A	TMEM167A	1246
VCAN	OK	negbinomial.size	0	0	VCAN	VCAN	9211
EDIL3	OK	negbinomial.size	1.3625e-36	2.62309e-36	EDIL3	EDIL3	16
COX7C	OK	negbinomial.size	5.09924e-19	7.34147e-19	COX7C	COX7C	6821
RASA1	OK	negbinomial.size	5.48549e-24	8.68323e-24	RASA1	RASA1	30
CCNH	OK	negbinomial.size	7.8864e-61	2.07973e-60	CCNH	CCNH	207
MEF2C	OK	negbinomial.size	3.88841e-179	2.47356e-178	MEF2C	MEF2C	2357
LUCAT1	OK	negbinomial.size	0	0	LUCAT1	LUCAT1	3649
ARRDC3	OK	negbinomial.size	5.67382e-57	1.43154e-56	ARRDC3	ARRDC3	1238
MCTP1	OK	negbinomial.size	2.46241e-16	3.36863e-16	MCTP1	MCTP1	60
TTC37	OK	negbinomial.size	6.77071e-46	1.49414e-45	TTC37	TTC37	78
RHOBTB3	OK	negbinomial.size	2.32949e-162	1.35265e-161	RHOBTB3	RHOBTB3	110
GLRX	OK	negbinomial.size	4.06419e-115	1.75086e-114	GLRX	GLRX	2337
ELL2	OK	negbinomial.size	9.33138e-268	8.98805e-267	ELL2	ELL2	1994
CAST	OK	negbinomial.size	1.0582e-27	1.79224e-27	CAST	CAST	4585
ERAP1	OK	negbinomial.size	3.15781e-27	5.30139e-27	ERAP1	ERAP1	26
LNPEP	OK	negbinomial.size	2.40838e-14	3.17489e-14	LNPEP	LNPEP	49
CHD1	OK	negbinomial.size	6.62084e-187	4.36121e-186	CHD1	CHD1	954
ST8SIA4	OK	negbinomial.size	2.92178e-25	4.73639e-25	ST8SIA4	ST8SIA4	165
PAM	OK	negbinomial.size	3.17332e-28	5.44227e-28	PAM	PAM	11
PPIP5K2	OK	negbinomial.size	8.89819e-08	9.99455e-08	PPIP5K2	PPIP5K2	51
FER	OK	negbinomial.size	1.81259e-32	3.30081e-32	FER	FER	10
PJA2	OK	negbinomial.size	5.6634e-15	7.5685e-15	PJA2	PJA2	458
MAN2A1	OK	negbinomial.size	4.48602e-21	6.70768e-21	MAN2A1	MAN2A1	95
WDR36	OK	negbinomial.size	4.49138e-69	1.29114e-68	WDR36	WDR36	12
STARD4	OK	negbinomial.size	1.18604e-23	1.86587e-23	STARD4	STARD4	28
EPB41L4A-AS1	OK	negbinomial.size	3.75065e-19	5.41515e-19	EPB41L4A-AS1	EPB41L4A-AS1	19
APC	OK	negbinomial.size	9.13287e-08	1.02563e-07	APC	APC	63
SRP19	OK	negbinomial.size	2.45468e-06	2.66951e-06	SRP19	SRP19	57
REEP5	OK	negbinomial.size	2.74232e-47	6.1604e-47	REEP5	REEP5	1563
DCP2	OK	negbinomial.size	6.38793e-09	7.37374e-09	DCP2	DCP2	137
YTHDC2	OK	negbinomial.size	0.000128885	0.000135128	YTHDC2	YTHDC2	12
PGGT1B	OK	negbinomial.size	8.20832e-07	9.05043e-07	PGGT1B	PGGT1B	14
CCDC112	OK	negbinomial.size	1.81491e-62	4.86996e-62	CCDC112	CCDC112	72
FEM1C	OK	negbinomial.size	0.0591526	0.0594632	FEM1C	FEM1C	40
TMED7	OK	negbinomial.size	2.61125e-11	3.19228e-11	TMED7	TMED7	39
ATG12	OK	negbinomial.size	0.0331745	0.033453	ATG12	ATG12	93
AP3S1	OK	negbinomial.size	7.79952e-08	8.77177e-08	AP3S1	AP3S1	64
DMXL1	OK	negbinomial.size	7.18118e-12	8.91065e-12	DMXL1	DMXL1	20
TNFAIP8	OK	negbinomial.size	1.26806e-39	2.56799e-39	TNFAIP8	TNFAIP8	478
HSD17B4	OK	negbinomial.size	4.67796e-82	1.51706e-81	HSD17B4	HSD17B4	335
SRFBP1	OK	negbinomial.size	1.38125e-37	2.71638e-37	SRFBP1	SRFBP1	15
LOX	OK	negbinomial.size	3.03203e-163	1.77066e-162	LOX	LOX	36
SNX2	OK	negbinomial.size	5.62886e-61	1.48695e-60	SNX2	SNX2	1156
SNX24	OK	negbinomial.size	2.93835e-44	6.34709e-44	SNX24	SNX24	37
PPIC	OK	negbinomial.size	4.32914e-108	1.75167e-107	PPIC	PPIC	12
PHAX	OK	negbinomial.size	1.44078e-24	2.3051e-24	PHAX	PHAX	23
LMNB1	OK	negbinomial.size	2.165e-245	1.87063e-244	LMNB1	LMNB1	72
PRRC1	OK	negbinomial.size	1.17918e-21	1.78055e-21	PRRC1	PRRC1	15
SLC12A2	OK	negbinomial.size	5.18042e-14	6.75937e-14	SLC12A2	SLC12A2	14
HINT1	OK	negbinomial.size	3.36301e-245	2.90166e-244	HINT1	HINT1	3292
CDC42SE2	OK	negbinomial.size	3.19451e-25	5.17029e-25	CDC42SE2	CDC42SE2	106
FNIP1	OK	negbinomial.size	0.0105136	0.0106633	FNIP1	FNIP1	95
IRF1	OK	negbinomial.size	3.02643e-98	1.12911e-97	IRF1	IRF1	1438
UQCRQ	OK	negbinomial.size	5.52108e-53	1.33001e-52	UQCRQ	UQCRQ	2490
AFF4	OK	negbinomial.size	6.44957e-40	1.31045e-39	AFF4	AFF4	917
ZCCHC10	OK	negbinomial.size	0.000287663	0.000299545	ZCCHC10	ZCCHC10	24
HSPA4	OK	negbinomial.size	3.08263e-38	6.11733e-38	HSPA4	HSPA4	194
VDAC1	OK	negbinomial.size	5.02438e-115	2.16147e-114	VDAC1	VDAC1	1696
SKP1	OK	negbinomial.size	6.20349e-07	6.85472e-07	SKP1	SKP1	1975
PPP2CA	OK	negbinomial.size	7.13642e-12	8.85691e-12	PPP2CA	PPP2CA	184
UBE2B	OK	negbinomial.size	9.23581e-24	1.45633e-23	UBE2B	UBE2B	804
SAR1B	OK	negbinomial.size	0.00351365	0.00358743	SAR1B	SAR1B	39
SEC24A	OK	negbinomial.size	8.43096e-06	9.04836e-06	SEC24A	SEC24A	11
CAMLG	OK	negbinomial.size	1.62407e-10	1.94965e-10	CAMLG	CAMLG	155
DDX46	OK	negbinomial.size	3.3092e-28	5.66895e-28	DDX46	DDX46	542
C5orf24	OK	negbinomial.size	5.30686e-36	1.01593e-35	C5orf24	C5orf24	38
TXNDC15	OK	negbinomial.size	5.42758e-14	7.07282e-14	TXNDC15	TXNDC15	11
H2AFY	OK	negbinomial.size	5.13335568168041e-315	5.8127424965654e-314	H2AFY	H2AFY	6670
CXCL14	OK	negbinomial.size	0	0	CXCL14	CXCL14	167
TGFBI	OK	negbinomial.size	0	0	TGFBI	TGFBI	8076
SMAD5	OK	negbinomial.size	7.98961e-37	1.54838e-36	SMAD5	SMAD5	27
SPOCK1	OK	negbinomial.size	1.07882e-167	6.46657e-167	SPOCK1	SPOCK1	37
HNRNPA0	OK	negbinomial.size	7.02978e-17	9.73648e-17	HNRNPA0	HNRNPA0	407
FAM13B	OK	negbinomial.size	0.000160499	0.000167956	FAM13B	FAM13B	22
FAM53C	OK	negbinomial.size	2.72886e-44	5.89872e-44	FAM53C	FAM53C	312
KDM3B	OK	negbinomial.size	2.15711e-07	2.40569e-07	KDM3B	KDM3B	10
EGR1	OK	negbinomial.size	0	0	EGR1	EGR1	2970
ETF1	OK	negbinomial.size	2.12764e-44	4.61051e-44	ETF1	ETF1	566
HSPA9	OK	negbinomial.size	8.3734e-32	1.5118e-31	HSPA9	HSPA9	1025
CTNNA1	OK	negbinomial.size	1.38981e-10	1.67138e-10	CTNNA1	CTNNA1	429
SIL1	OK	negbinomial.size	3.93855e-35	7.45829e-35	SIL1	SIL1	60
PAIP2	OK	negbinomial.size	1.84248e-12	2.31387e-12	PAIP2	PAIP2	514
MZB1	OK	negbinomial.size	1.67355e-154	9.32861e-154	MZB1	MZB1	47
TMEM173	OK	negbinomial.size	4.17912e-29	7.23813e-29	TMEM173	TMEM173	86
UBE2D2	OK	negbinomial.size	2.22848e-07	2.48393e-07	UBE2D2	UBE2D2	500
CXXC5	OK	negbinomial.size	9.11657e-106	3.61945e-105	CXXC5	CXXC5	102
PURA	OK	negbinomial.size	1.6891e-52	4.04672e-52	PURA	PURA	95
CYSTM1	OK	negbinomial.size	6.44475e-129	3.0393e-128	CYSTM1	CYSTM1	189
PFDN1	OK	negbinomial.size	7.21413e-12	8.94973e-12	PFDN1	PFDN1	98
HBEGF	OK	negbinomial.size	0	0	HBEGF	HBEGF	3252
SRA1	OK	negbinomial.size	1.60646e-52	3.85023e-52	SRA1	SRA1	271
SLC35A4	OK	negbinomial.size	4.48357e-15	6.00096e-15	SLC35A4	SLC35A4	16
CD14	OK	negbinomial.size	0	0	CD14	CD14	11792
NDUFA2	OK	negbinomial.size	1.86558e-18	2.66027e-18	NDUFA2	NDUFA2	1009
IK	OK	negbinomial.size	7.57756e-12	9.39679e-12	IK	IK	308
ZMAT2	OK	negbinomial.size	8.24842e-11	9.97627e-11	ZMAT2	ZMAT2	136
VTRNA1-3	OK	negbinomial.size	1.37078e-13	1.76787e-13	VTRNA1-3	VTRNA1-3	32
TAF7	OK	negbinomial.size	3.40427e-17	4.74399e-17	TAF7	TAF7	408
DIAPH1	OK	negbinomial.size	7.7891e-100	2.93457e-99	DIAPH1	DIAPH1	234
GNPDA1	OK	negbinomial.size	3.20308e-111	1.33121e-110	GNPDA1	GNPDA1	357
NDFIP1	OK	negbinomial.size	5.53609e-22	8.42376e-22	NDFIP1	NDFIP1	451
ARHGAP26	OK	negbinomial.size	1.99336e-45	4.37838e-45	ARHGAP26	ARHGAP26	370
NR3C1	OK	negbinomial.size	1.91297e-09	2.23301e-09	NR3C1	NR3C1	457
YIPF5	OK	negbinomial.size	0.000261943	0.000272995	YIPF5	YIPF5	31
LARS	OK	negbinomial.size	4.75995e-66	1.32603e-65	LARS	LARS	411
TCERG1	OK	negbinomial.size	7.11273e-18	1.00467e-17	TCERG1	TCERG1	104
DPYSL3	OK	negbinomial.size	3.25498e-46	7.20375e-46	DPYSL3	DPYSL3	23
JAKMIP2	OK	negbinomial.size	1.87549e-90	6.57657e-90	JAKMIP2	JAKMIP2	41
SPINK1	OK	negbinomial.size	1.05939e-09	1.24565e-09	SPINK1	SPINK1	13
FBXO38	OK	negbinomial.size	5.37109e-38	1.06208e-37	FBXO38	FBXO38	23
ADRB2	OK	negbinomial.size	2.0345e-39	4.09979e-39	ADRB2	ADRB2	105
ABLIM3	OK	negbinomial.size	1.0998e-66	3.08772e-66	ABLIM3	ABLIM3	23
CARMN	OK	negbinomial.size	1.30415e-79	4.12452e-79	CARMN	CARMN	39
CSNK1A1	OK	negbinomial.size	3.95281e-10	4.68918e-10	CSNK1A1	CSNK1A1	449
AC021078.1	OK	negbinomial.size	7.22289e-49	1.65783e-48	AC021078.1	AC021078.1	234
SLC26A2	OK	negbinomial.size	8.47456e-22	1.28408e-21	SLC26A2	SLC26A2	46
HMGXB3	OK	negbinomial.size	1.96572e-10	2.35288e-10	HMGXB3	HMGXB3	15
CSF1R	OK	negbinomial.size	0	0	CSF1R	CSF1R	4852
PDGFRB	OK	negbinomial.size	1.53565e-223	1.19232e-222	PDGFRB	PDGFRB	58
TCOF1	OK	negbinomial.size	1.6653e-33	3.083e-33	TCOF1	TCOF1	59
CD74	OK	negbinomial.size	0	0	CD74	CD74	13967
RPS14	OK	negbinomial.size	4.27784e-236	3.52706e-235	RPS14	RPS14	18645
SYNPO	OK	negbinomial.size	5.22907e-27	8.74033e-27	SYNPO	SYNPO	21
RBM22	OK	negbinomial.size	0.123223	0.123688	RBM22	RBM22	60
DCTN4	OK	negbinomial.size	2.25599e-13	2.89065e-13	DCTN4	DCTN4	36
SMIM3	OK	negbinomial.size	3.73125e-104	1.46149e-103	SMIM3	SMIM3	322
GPX3	OK	negbinomial.size	0	0	GPX3	GPX3	397
TNIP1	OK	negbinomial.size	1.09339e-42	2.31529e-42	TNIP1	TNIP1	74
ANXA6	OK	negbinomial.size	7.0202e-57	1.76978e-56	ANXA6	ANXA6	225
CCDC69	OK	negbinomial.size	2.32212e-225	1.82142e-224	CCDC69	CCDC69	88
GM2A	OK	negbinomial.size	8.63495e-43	1.83037e-42	GM2A	GM2A	341
SLC36A1	OK	negbinomial.size	4.87824e-58	1.24621e-57	SLC36A1	SLC36A1	11
SPARC	OK	negbinomial.size	0	0	SPARC	SPARC	364
ATOX1	OK	negbinomial.size	1.90077e-199	1.33994e-198	ATOX1	ATOX1	1886
G3BP1	OK	negbinomial.size	3.11722e-65	8.59798e-65	G3BP1	G3BP1	659
LARP1	OK	negbinomial.size	4.81782e-44	1.03703e-43	LARP1	LARP1	336
MRPL22	OK	negbinomial.size	1.69905e-20	2.51168e-20	MRPL22	MRPL22	14
HAVCR2	OK	negbinomial.size	4.34607e-101	1.65985e-100	HAVCR2	HAVCR2	1174
CYFIP2	OK	negbinomial.size	1.77494e-52	4.25069e-52	CYFIP2	CYFIP2	11
ADAM19	OK	negbinomial.size	1.12683e-97	4.17856e-97	ADAM19	ADAM19	13
CLINT1	OK	negbinomial.size	8.59643e-06	9.22272e-06	CLINT1	CLINT1	183
EBF1	OK	negbinomial.size	3.26437e-228	2.60724e-227	EBF1	EBF1	49
RNF145	OK	negbinomial.size	7.97292e-18	1.12514e-17	RNF145	RNF145	113
UBLCP1	OK	negbinomial.size	0.00090529	0.000934582	UBLCP1	UBLCP1	14
TTC1	OK	negbinomial.size	3.80021e-12	4.74233e-12	TTC1	TTC1	115
PWWP2A	OK	negbinomial.size	0.000840942	0.000868737	PWWP2A	PWWP2A	11
SLU7	OK	negbinomial.size	0.105676	0.106109	SLU7	SLU7	78
PTTG1	OK	negbinomial.size	0	0	PTTG1	PTTG1	166
GABRB2	OK	negbinomial.size	1.31899e-91	4.65712e-91	GABRB2	GABRB2	16
NUDCD2	OK	negbinomial.size	4.2623e-22	6.50333e-22	NUDCD2	NUDCD2	13
HMMR	OK	negbinomial.size	9.1289e-266	8.71085e-265	HMMR	HMMR	78
MAT2B	OK	negbinomial.size	7.73518e-05	8.14047e-05	MAT2B	MAT2B	37
RARS	OK	negbinomial.size	1.2771e-18	1.82536e-18	RARS	RARS	34
PANK3	OK	negbinomial.size	1.65808e-17	2.32222e-17	PANK3	PANK3	27
SLIT3	OK	negbinomial.size	3.54135e-166	2.10624e-165	SLIT3	SLIT3	40
DOCK2	OK	negbinomial.size	1.30086e-08	1.48926e-08	DOCK2	DOCK2	219
LCP2	OK	negbinomial.size	4.44406e-74	1.33256e-73	LCP2	LCP2	1624
KCNMB1	OK	negbinomial.size	1.82237e-14	2.40599e-14	KCNMB1	KCNMB1	21
NPM1	OK	negbinomial.size	2.99837e-217	2.26766e-216	NPM1	NPM1	6197
FBXW11	OK	negbinomial.size	1.15029e-06	1.26284e-06	FBXW11	FBXW11	33
STK10	OK	negbinomial.size	6.55034e-53	1.57733e-52	STK10	STK10	130
SH3PXD2B	OK	negbinomial.size	1.60662e-47	3.62376e-47	SH3PXD2B	SH3PXD2B	116
NEURL1B	OK	negbinomial.size	8.18121e-41	1.68634e-40	NEURL1B	NEURL1B	13
DUSP1	OK	negbinomial.size	0	0	DUSP1	DUSP1	14537
ERGIC1	OK	negbinomial.size	3.80116e-219	2.9071e-218	ERGIC1	ERGIC1	769
RPL26L1	OK	negbinomial.size	3.36085e-11	4.0956e-11	RPL26L1	RPL26L1	15
ATP6V0E1	OK	negbinomial.size	1.0201e-52	2.45065e-52	ATP6V0E1	ATP6V0E1	5823
CREBRF	OK	negbinomial.size	1.03314e-68	2.95886e-68	CREBRF	CREBRF	622
CPEB4	OK	negbinomial.size	4.27097e-78	1.32745e-77	CPEB4	CPEB4	764
HRH2	OK	negbinomial.size	3.04785e-52	7.28203e-52	HRH2	HRH2	173
NOP16	OK	negbinomial.size	8.06658e-35	1.52189e-34	NOP16	NOP16	20
HIGD2A	OK	negbinomial.size	2.88723e-16	3.94099e-16	HIGD2A	HIGD2A	886
CLTB	OK	negbinomial.size	5.96144e-13	7.56886e-13	CLTB	CLTB	147
HK3	OK	negbinomial.size	3.25505e-84	1.08078e-83	HK3	HK3	11
NSD1	OK	negbinomial.size	5.24753e-08	5.92669e-08	NSD1	NSD1	103
MXD3	OK	negbinomial.size	1.751e-75	5.33132e-75	MXD3	MXD3	14
PRELID1	OK	negbinomial.size	2.0902e-297	2.24249e-296	PRELID1	PRELID1	2374
LMAN2	OK	negbinomial.size	1.6783e-22	2.58323e-22	LMAN2	LMAN2	662
GRK6	OK	negbinomial.size	2.4674e-63	6.67931e-63	GRK6	GRK6	32
PDLIM7	OK	negbinomial.size	6.39989e-151	3.4726e-150	PDLIM7	PDLIM7	175
DOK3	OK	negbinomial.size	4.13873e-58	1.0595e-57	DOK3	DOK3	30
TMED9	OK	negbinomial.size	1.79309e-97	6.62514e-97	TMED9	TMED9	937
NHP2	OK	negbinomial.size	2.82355e-141	1.43902e-140	NHP2	NHP2	725
HNRNPAB	OK	negbinomial.size	6.98619e-145	3.64854e-144	HNRNPAB	HNRNPAB	1809
PHYKPL	OK	negbinomial.size	9.79385e-19	1.40246e-18	PHYKPL	PHYKPL	14
ADAMTS2	OK	negbinomial.size	2.47982e-66	6.93352e-66	ADAMTS2	ADAMTS2	27
RUFY1	OK	negbinomial.size	7.6498e-11	9.25774e-11	RUFY1	RUFY1	49
HNRNPH1	OK	negbinomial.size	6.10097e-27	1.01783e-26	HNRNPH1	HNRNPH1	1212
CANX	OK	negbinomial.size	1.53148e-247	1.33835e-246	CANX	CANX	6686
LTC4S	OK	negbinomial.size	0	0	LTC4S	LTC4S	244
MGAT4B	OK	negbinomial.size	1.35922e-15	1.83445e-15	MGAT4B	MGAT4B	16
SQSTM1	OK	negbinomial.size	2.68864e-74	8.0778e-74	SQSTM1	SQSTM1	4375
MRNIP	OK	negbinomial.size	5.48556e-27	9.16404e-27	MRNIP	MRNIP	22
AC008393.1	OK	negbinomial.size	6.91592e-09	7.9772e-09	AC008393.1	AC008393.1	22
TBC1D9B	OK	negbinomial.size	5.7644e-31	1.02773e-30	TBC1D9B	TBC1D9B	41
RNF130	OK	negbinomial.size	4.0156e-71	1.16807e-70	RNF130	RNF130	2682
GFPT2	OK	negbinomial.size	8.87837e-50	2.06488e-49	GFPT2	GFPT2	11
MGAT1	OK	negbinomial.size	1.16642e-83	3.85411e-83	MGAT1	MGAT1	3155
HEIH	OK	negbinomial.size	1.76741e-33	3.27105e-33	HEIH	HEIH	117
LINC00847	OK	negbinomial.size	1.91949e-17	2.68465e-17	LINC00847	LINC00847	27
RACK1	OK	negbinomial.size	8.55365e-57	2.15282e-56	RACK1	RACK1	15063
TRIM52	OK	negbinomial.size	0.00060866	0.000630052	TRIM52	TRIM52	34
DUSP22	OK	negbinomial.size	5.6873e-05	6.00489e-05	DUSP22	DUSP22	25
IRF4	OK	negbinomial.size	1.02274e-149	5.51524e-149	IRF4	IRF4	73
FOXC1	OK	negbinomial.size	5.26976e-54	1.28564e-53	FOXC1	FOXC1	24
SERPINB1	OK	negbinomial.size	0	0	SERPINB1	SERPINB1	2189
SERPINB9	OK	negbinomial.size	0	0	SERPINB9	SERPINB9	718
SERPINB6	OK	negbinomial.size	3.70321e-24	5.88174e-24	SERPINB6	SERPINB6	727
NQO2	OK	negbinomial.size	3.58352e-33	6.59634e-33	NQO2	NQO2	377
TUBB2A	OK	negbinomial.size	4.83992e-70	1.3979e-69	TUBB2A	TUBB2A	85
TUBB2B	OK	negbinomial.size	7.63359e-38	1.50655e-37	TUBB2B	TUBB2B	10
[truncated: 4,128 more rows]
